# Supplementary material
Source: PubMed Central journal article supplement (PMC3223292)
Supplement: NIHMS328607-supplement-02.pdf [file NIHMS328607-supplement-02.pdf]

**Table S2. Intra-*Schistosoma* comparative genomic analyses (homologous synteny blocks at 10 kb resolution).**

| Feature type <sup>1</sup> | SMA chr <sup>2</sup> | SMA feature start <sup>3</sup> | SMA feature end <sup>4</sup> | SJA scaffold <sup>5</sup> | SJA feature start <sup>6</sup> | SJA feature end <sup>7</sup> | Alignment orientation <sup>8</sup> | SJA_gene_id <sup>9</sup> | GO term <sup>10</sup> | P-value <sup>11</sup> |
|---------------------------|----------------------|--------------------------------|------------------------------|---------------------------|--------------------------------|------------------------------|------------------------------------|--------------------------|-----------------------|-----------------------|
| HSB10kb_1                 | 1                    | 6213894                        | 6391666                      | SJC_S000000               | 651                            | 125858                       | +                                  | Sjp_0000020.1            | NA                    | NA                    |
| HSB10kb_1                 | 1                    | 6213894                        | 6391666                      | SJC_S000000               | 651                            | 125858                       | +                                  | Sjp_0000030.1            | transporter activity  | 0.782                 |
| HSB10kb_1                 | 1                    | 6213894                        | 6391666                      | SJC_S000000               | 651                            | 125858                       | +                                  | Sjp_0000040.1            | NA                    | NA                    |
| HSB10kb_1                 | 1                    | 6213894                        | 6391666                      | SJC_S000000               | 651                            | 125858                       | +                                  | Sjp_0000050.1            | NA                    | NA                    |
| HSB10kb_1                 | 1                    | 6213894                        | 6391666                      | SJC_S000000               | 651                            | 125858                       | +                                  | Sjp_0000060.1            | NA                    | NA                    |
| EBR10kb_1                 | "1,1"                | NA                             | NA                           | SJC_S000000               | 125859                         | 152905                       | NA                                 | NA                       | NA                    | NA                    |
| HSB10kb_2                 | 1                    | 6509984                        | 6522764                      | SJC_S000000               | 152906                         | 179053                       | +                                  | NA                       | NA                    | NA                    |
| EBR10kb_2                 | "1,1"                | NA                             | NA                           | SJC_S000000               | 179054                         | 258888                       | NA                                 | Sjp_0000070.1            | NA                    | NA                    |
| HSB10kb_3                 | 1                    | 6491521                        | 6505604                      | SJC_S000000               | 258889                         | 275975                       | +                                  | Sjp_0000070.1            | NA                    | NA                    |
| EBR10kb_3                 | "1,1"                | NA                             | NA                           | SJC_S000000               | 275976                         | 293686                       | NA                                 | Sjp_0000070.1            | NA                    | NA                    |
| HSB10kb_4                 | 1                    | 6523230                        | 6697552                      | SJC_S000000               | 293687                         | 458650                       | +                                  | Sjp_0000070.1            | NA                    | NA                    |
| HSB10kb_4                 | 1                    | 6523230                        | 6697552                      | SJC_S000000               | 293687                         | 458650                       | +                                  | Sjp_0000080.1            | NA                    | NA                    |
| EBR10kb_4                 | "1,1"                | NA                             | NA                           | SJC_S000000               | 458651                         | 500169                       | NA                                 | Sjp_0000090.1            | catalytic activity    | 0.035844              |
| HSB10kb_5                 | 1                    | 35741407                       | 35800627                     | SJC_S000000               | 500170                         | 576700                       | +                                  | Sjp_0000090.1            | catalytic activity    | 0.035844              |
| HSB10kb_5                 | 1                    | 35741407                       | 35800627                     | SJC_S000000               | 500170                         | 576700                       | +                                  | Sjp_0000100.1            | NA                    | NA                    |

<sup>1</sup> Features are defined as either Homologous Synteny Blocks (HSB10Kb\_n) or Evolutionary Breakpoint Regions (EBR10Kb\_n), where n is the number of that feature; "unknown" signifies that neither feature was defined for a gene.

<sup>2</sup> Provides the *S. mansoni* chromosome number for an HSB or a pair of chromosome numbers for an EBR.

<sup>3</sup> The feature start position in the *S. mansoni* chromosome.

<sup>4</sup> The feature end position in the *S. mansoni* chromosome.

<sup>5</sup> The *S. japonicum* scaffold identifier.

<sup>6</sup> The positions in the *S. japonicum* scaffold where the HSB or EBR feature begins.

<sup>7</sup> The positions in the *S. japonicum* scaffold where the HSB or EBR feature ends.

<sup>8</sup> The alignment orientation of an HSB to the *S. mansoni* chromosome.

<sup>9</sup> The *S. japonicum* gene systematic identifier.

<sup>10</sup> An associated gene ontology (GO) term for the *S. japonicum* gene based on the name of its gene product or NA if no GO term was assigned (see Figure 3 legend for more details).

<sup>11</sup> The *p*-value associated with the enrichment of GO categories in the evolutionary breakpoint regions and surrounding intervals.

NA: not applicable

|           |       |          |          |             |         |         |    |               |                               |          |
|-----------|-------|----------|----------|-------------|---------|---------|----|---------------|-------------------------------|----------|
| HSB10kb_5 | 1     | 35741407 | 35800627 | SJC_S000000 | 500170  | 576700  | +  | Sjp_0000110.1 | catalytic activity            | 0.035844 |
| HSB10kb_5 | 1     | 35741407 | 35800627 | SJC_S000000 | 500170  | 576700  | +  | Sjp_0000120.1 | NA                            | NA       |
| EBR10kb_5 | "1,1" | NA       | NA       | SJC_S000000 | 576701  | 583700  | NA | Sjp_0000120.1 | NA                            | NA       |
| HSB10kb_6 | 1     | 6806132  | 6817058  | SJC_S000000 | 583701  | 598862  | +  | Sjp_0000120.1 | NA                            | NA       |
| EBR10kb_6 | "1,1" | NA       | NA       | SJC_S000000 | 598863  | 635904  | NA | Sjp_0000130.1 | NA                            | NA       |
| EBR10kb_6 | "1,1" | NA       | NA       | SJC_S000000 | 598863  | 635904  | NA | Sjp_0000140.1 | NA                            | NA       |
| EBR10kb_6 | "1,1" | NA       | NA       | SJC_S000000 | 598863  | 635904  | NA | Sjp_0000150.1 | NA                            | NA       |
| HSB10kb_7 | 1     | 6819089  | 7011160  | SJC_S000000 | 635905  | 844313  | +  | Sjp_0000150.1 | NA                            | NA       |
| HSB10kb_7 | 1     | 6819089  | 7011160  | SJC_S000000 | 635905  | 844313  | +  | Sjp_0000160.1 | NA                            | NA       |
| HSB10kb_7 | 1     | 6819089  | 7011160  | SJC_S000000 | 635905  | 844313  | +  | Sjp_0000170.1 | NA                            | NA       |
| HSB10kb_7 | 1     | 6819089  | 7011160  | SJC_S000000 | 635905  | 844313  | +  | Sjp_0000180.1 | NA                            | NA       |
| HSB10kb_7 | 1     | 6819089  | 7011160  | SJC_S000000 | 635905  | 844313  | +  | Sjp_0000200.1 | biological regulation         | 0.76396  |
| HSB10kb_7 | 1     | 6819089  | 7011160  | SJC_S000000 | 635905  | 844313  | +  | Sjp_0000210.1 | enzyme regulator activity     | 0.1755   |
| HSB10kb_7 | 1     | 6819089  | 7011160  | SJC_S000000 | 635905  | 844313  | +  | Sjp_0000220.1 | NA                            | NA       |
| EBR10kb_7 | "1,1" | NA       | NA       | SJC_S000000 | 844314  | 893786  | NA | Sjp_0000230.1 | NA                            | NA       |
| EBR10kb_7 | "1,1" | NA       | NA       | SJC_S000000 | 844314  | 893786  | NA | Sjp_0000240.1 | cell part                     | 0.009037 |
| HSB10kb_8 | 1     | 39179188 | 39208863 | SJC_S000000 | 893787  | 920252  | -  | Sjp_0000250.1 | response to stimulus          | NA       |
| HSB10kb_8 | 1     | 39179188 | 39208863 | SJC_S000000 | 893787  | 920252  | -  | Sjp_0000260.1 | cell part                     | 0.009037 |
| EBR10kb_8 | "1,1" | NA       | NA       | SJC_S000000 | 920253  | 920837  | NA | NA            | NA                            | NA       |
| HSB10kb_9 | 1     | 7056367  | 7201546  | SJC_S000000 | 920838  | 1068976 | +  | Sjp_0000280.1 | establishment of localization | NA       |
| HSB10kb_9 | 1     | 7056367  | 7201546  | SJC_S000000 | 920838  | 1068976 | +  | Sjp_0000290.1 | NA                            | NA       |
| HSB10kb_9 | 1     | 7056367  | 7201546  | SJC_S000000 | 920838  | 1068976 | +  | Sjp_0000300.1 | NA                            | NA       |
| HSB10kb_9 | 1     | 7056367  | 7201546  | SJC_S000000 | 920838  | 1068976 | +  | Sjp_0000310.1 | NA                            | NA       |
| HSB10kb_9 | 1     | 7056367  | 7201546  | SJC_S000000 | 920838  | 1068976 | +  | Sjp_0000320.1 | NA                            | NA       |
| HSB10kb_9 | 1     | 7056367  | 7201546  | SJC_S000000 | 920838  | 1068976 | +  | Sjp_0000330.1 | establishment of localization | NA       |
| HSB10kb_9 | 1     | 7056367  | 7201546  | SJC_S000000 | 920838  | 1068976 | +  | Sjp_0000340.1 | establishment of localization | NA       |
| EBR10kb_9 | "1,1" | NA       | NA       | SJC_S000000 | 1068977 | 1075621 | NA | Sjp_0000340.1 | establishment                 | NA       |

|            |       |          |          |             |         |         |    |               |                               |          |
|------------|-------|----------|----------|-------------|---------|---------|----|---------------|-------------------------------|----------|
|            |       |          |          |             |         |         |    |               | of localization               |          |
| EBR10kb_9  | "1,1" | NA       | NA       | SJC_S000000 | 1068977 | 1075621 | NA | Sjp_0000350.1 | NA                            | NA       |
| HSB10kb_10 | 1     | 7202701  | 7224442  | SJC_S000000 | 1075622 | 1092268 | -  | Sjp_0000350.1 | NA                            | NA       |
| EBR10kb_10 | "1,1" | NA       | NA       | SJC_S000000 | 1092269 | 1093243 | NA | NA            | NA                            | NA       |
| HSB10kb_11 | 1     | 7229142  | 7562557  | SJC_S000000 | 1093244 | 1432429 | +  | Sjp_0000360.1 | cell part                     | 0.009037 |
| HSB10kb_11 | 1     | 7229142  | 7562557  | SJC_S000000 | 1093244 | 1432429 | +  | Sjp_0000370.1 | NA                            | NA       |
| HSB10kb_11 | 1     | 7229142  | 7562557  | SJC_S000000 | 1093244 | 1432429 | +  | Sjp_0000380.1 | NA                            | NA       |
| HSB10kb_11 | 1     | 7229142  | 7562557  | SJC_S000000 | 1093244 | 1432429 | +  | Sjp_0000390.1 | NA                            | NA       |
| HSB10kb_11 | 1     | 7229142  | 7562557  | SJC_S000000 | 1093244 | 1432429 | +  | Sjp_0000400.1 | cell part                     | 0.009037 |
| HSB10kb_11 | 1     | 7229142  | 7562557  | SJC_S000000 | 1093244 | 1432429 | +  | Sjp_0000410.1 | cell part                     | 0.009037 |
| EBR10kb_11 | "1,1" | NA       | NA       | SJC_S000000 | 1432430 | 1500366 | NA | Sjp_0000420.1 | NA                            | NA       |
| HSB10kb_12 | 1     | 7894497  | 7926983  | SJC_S000000 | 1500367 | 1511203 |    | NA            | NA                            | NA       |
| EBR10kb_12 | "1,1" | NA       | NA       | SJC_S000000 | 1511204 | 1531195 | NA | Sjp_0000430.1 | NA                            | NA       |
| HSB10kb_13 | 1     | 7677839  | 7775629  | SJC_S000000 | 1531196 | 1654722 | +  | Sjp_0000430.1 | NA                            | NA       |
| HSB10kb_13 | 1     | 7677839  | 7775629  | SJC_S000000 | 1531196 | 1654722 | +  | Sjp_0000440.1 | NA                            | NA       |
| HSB10kb_13 | 1     | 7677839  | 7775629  | SJC_S000000 | 1531196 | 1654722 | +  | Sjp_0000450.1 | NA                            | NA       |
| HSB10kb_14 | 4     | 20613307 | 21378640 | SJC_S000001 | 25262   | 737150  | +  | Sjp_0000460.1 | cellular process              | 0.63852  |
| HSB10kb_14 | 4     | 20613307 | 21378640 | SJC_S000001 | 25262   | 737150  | +  | Sjp_0000470.1 | NA                            | NA       |
| HSB10kb_14 | 4     | 20613307 | 21378640 | SJC_S000001 | 25262   | 737150  | +  | Sjp_0000480.1 | biological regulation         | 0.76396  |
| HSB10kb_14 | 4     | 20613307 | 21378640 | SJC_S000001 | 25262   | 737150  | +  | Sjp_0000490.1 | NA                            | NA       |
| HSB10kb_14 | 4     | 20613307 | 21378640 | SJC_S000001 | 25262   | 737150  | +  | Sjp_0000500.1 | NA                            | NA       |
| HSB10kb_14 | 4     | 20613307 | 21378640 | SJC_S000001 | 25262   | 737150  | +  | Sjp_0000510.1 | NA                            | NA       |
| HSB10kb_14 | 4     | 20613307 | 21378640 | SJC_S000001 | 25262   | 737150  | +  | Sjp_0000520.1 | NA                            | NA       |
| HSB10kb_14 | 4     | 20613307 | 21378640 | SJC_S000001 | 25262   | 737150  | +  | Sjp_0000530.1 | NA                            | NA       |
| HSB10kb_14 | 4     | 20613307 | 21378640 | SJC_S000001 | 25262   | 737150  | +  | Sjp_0000540.1 | molecular transducer activity | 0.50162  |
| HSB10kb_14 | 4     | 20613307 | 21378640 | SJC_S000001 | 25262   | 737150  | +  | Sjp_0000550.1 | NA                            | NA       |
| HSB10kb_14 | 4     | 20613307 | 21378640 | SJC_S000001 | 25262   | 737150  | +  | Sjp_0000560.1 | cellular process              | 0.63852  |
| HSB10kb_14 | 4     | 20613307 | 21378640 | SJC_S000001 | 25262   | 737150  | +  | Sjp_0000570.1 | biological regulation         | 0.76396  |
| HSB10kb_14 | 4     | 20613307 | 21378640 | SJC_S000001 | 25262   | 737150  | +  | Sjp_0000580.1 | NA                            | NA       |
| HSB10kb_14 | 4     | 20613307 | 21378640 | SJC_S000001 | 25262   | 737150  | +  | Sjp_0000600.1 | NA                            | NA       |

|            |       |          |          |             |        |         |    |               |                                  |          |
|------------|-------|----------|----------|-------------|--------|---------|----|---------------|----------------------------------|----------|
| HSB10kb_14 | 4     | 20613307 | 21378640 | SJC_S000001 | 25262  | 737150  | +  | Sjp_0000610.1 | transcription regulator activity | NA       |
| HSB10kb_14 | 4     | 20613307 | 21378640 | SJC_S000001 | 25262  | 737150  | +  | Sjp_0000620.1 | NA                               | NA       |
| HSB10kb_14 | 4     | 20613307 | 21378640 | SJC_S000001 | 25262  | 737150  | +  | Sjp_0000630.1 | NA                               | NA       |
| HSB10kb_14 | 4     | 20613307 | 21378640 | SJC_S000001 | 25262  | 737150  | +  | Sjp_0000640.1 | catalytic activity               | 0.035844 |
| HSB10kb_14 | 4     | 20613307 | 21378640 | SJC_S000001 | 25262  | 737150  | +  | Sjp_0000650.1 | catalytic activity               | 0.035844 |
| HSB10kb_14 | 4     | 20613307 | 21378640 | SJC_S000001 | 25262  | 737150  | +  | Sjp_0000660.1 | NA                               | NA       |
| HSB10kb_14 | 4     | 20613307 | 21378640 | SJC_S000001 | 25262  | 737150  | +  | Sjp_0000670.1 | NA                               | NA       |
| HSB10kb_14 | 4     | 20613307 | 21378640 | SJC_S000001 | 25262  | 737150  | +  | Sjp_0000680.1 | catalytic activity               | 0.035844 |
| HSB10kb_14 | 4     | 20613307 | 21378640 | SJC_S000001 | 25262  | 737150  | +  | Sjp_0000690.1 | NA                               | NA       |
| EBR10kb_13 | "4,4" | NA       | NA       | SJC_S000001 | 737151 | 750327  | NA | Sjp_0000700.1 | biological regulation            | 0.76396  |
| HSB10kb_15 | 4     | 21400642 | 21566874 | SJC_S000001 | 750328 | 909913  | -  | Sjp_0000700.1 | biological regulation            | 0.76396  |
| HSB10kb_15 | 4     | 21400642 | 21566874 | SJC_S000001 | 750328 | 909913  | -  | Sjp_0000710.1 | NA                               | NA       |
| HSB10kb_15 | 4     | 21400642 | 21566874 | SJC_S000001 | 750328 | 909913  | -  | Sjp_0000720.1 | NA                               | NA       |
| HSB10kb_15 | 4     | 21400642 | 21566874 | SJC_S000001 | 750328 | 909913  | -  | Sjp_0000730.1 | NA                               | NA       |
| HSB10kb_15 | 4     | 21400642 | 21566874 | SJC_S000001 | 750328 | 909913  | -  | Sjp_0000740.1 | NA                               | NA       |
| EBR10kb_14 | "4,4" | NA       | NA       | SJC_S000001 | 909914 | 961532  | NA | Sjp_0000750.1 | NA                               | NA       |
| EBR10kb_14 | "4,4" | NA       | NA       | SJC_S000001 | 909914 | 961532  | NA | Sjp_0000760.1 | NA                               | NA       |
| HSB10kb_16 | 4     | 21639457 | 21994016 | SJC_S000001 | 961533 | 1224722 | +  | Sjp_0000760.1 | NA                               | NA       |
| HSB10kb_16 | 4     | 21639457 | 21994016 | SJC_S000001 | 961533 | 1224722 | +  | Sjp_0000770.1 | NA                               | NA       |
| HSB10kb_16 | 4     | 21639457 | 21994016 | SJC_S000001 | 961533 | 1224722 | +  | Sjp_0000780.1 | biological regulation            | 0.76396  |
| HSB10kb_16 | 4     | 21639457 | 21994016 | SJC_S000001 | 961533 | 1224722 | +  | Sjp_0000790.1 | binding                          | 0.052762 |
| HSB10kb_16 | 4     | 21639457 | 21994016 | SJC_S000001 | 961533 | 1224722 | +  | Sjp_0000800.1 | cellular process                 | 0.63852  |
| HSB10kb_16 | 4     | 21639457 | 21994016 | SJC_S000001 | 961533 | 1224722 | +  | Sjp_0000810.1 | cell part                        | 0.009037 |
| HSB10kb_16 | 4     | 21639457 | 21994016 | SJC_S000001 | 961533 | 1224722 | +  | Sjp_0000820.1 | cell part                        | 0.009037 |
| HSB10kb_16 | 4     | 21639457 | 21994016 | SJC_S000001 | 961533 | 1224722 | +  | Sjp_0000830.1 | catalytic activity               | 0.035844 |
| HSB10kb_16 | 4     | 21639457 | 21994016 | SJC_S000001 | 961533 | 1224722 | +  | Sjp_0000840.1 | biological regulation            | 0.76396  |
| HSB10kb_16 | 4     | 21639457 | 21994016 | SJC_S000001 | 961533 | 1224722 | +  | Sjp_0000850.1 | NA                               | NA       |
| HSB10kb_16 | 4     | 21639457 | 21994016 | SJC_S000001 | 961533 | 1224722 | +  | Sjp_0000860.1 | NA                               | NA       |

|            |       |          |          |             |         |         |    |               |                       |          |
|------------|-------|----------|----------|-------------|---------|---------|----|---------------|-----------------------|----------|
| EBR10kb_15 | "4,4" | NA       | NA       | SJC_S000001 | 1224723 | 1241704 | NA | Sjp_0000870.1 | NA                    | NA       |
| HSB10kb_17 | 4     | 22046383 | 22412455 | SJC_S000001 | 1241705 | 1574960 | +  | Sjp_0000870.1 | NA                    | NA       |
| HSB10kb_17 | 4     | 22046383 | 22412455 | SJC_S000001 | 1241705 | 1574960 | +  | Sjp_0000880.1 | binding               | 0.052762 |
| HSB10kb_17 | 4     | 22046383 | 22412455 | SJC_S000001 | 1241705 | 1574960 | +  | Sjp_0000890.1 | catalytic activity    | 0.035844 |
| HSB10kb_17 | 4     | 22046383 | 22412455 | SJC_S000001 | 1241705 | 1574960 | +  | Sjp_0000900.1 | catalytic activity    | 0.035844 |
| HSB10kb_17 | 4     | 22046383 | 22412455 | SJC_S000001 | 1241705 | 1574960 | +  | Sjp_0000910.1 | catalytic activity    | 0.035844 |
| HSB10kb_17 | 4     | 22046383 | 22412455 | SJC_S000001 | 1241705 | 1574960 | +  | Sjp_0000920.1 | transporter activity  | 0.782    |
| HSB10kb_17 | 4     | 22046383 | 22412455 | SJC_S000001 | 1241705 | 1574960 | +  | Sjp_0000930.1 | metabolic process     | 0.41934  |
| HSB10kb_17 | 4     | 22046383 | 22412455 | SJC_S000001 | 1241705 | 1574960 | +  | Sjp_0000940.1 | cellular process      | 0.63852  |
| HSB10kb_17 | 4     | 22046383 | 22412455 | SJC_S000001 | 1241705 | 1574960 | +  | Sjp_0000950.1 | biological regulation | 0.76396  |
| HSB10kb_17 | 4     | 22046383 | 22412455 | SJC_S000001 | 1241705 | 1574960 | +  | Sjp_0000960.1 | NA                    | NA       |
| HSB10kb_17 | 4     | 22046383 | 22412455 | SJC_S000001 | 1241705 | 1574960 | +  | Sjp_0000970.1 | NA                    | NA       |
| HSB10kb_17 | 4     | 22046383 | 22412455 | SJC_S000001 | 1241705 | 1574960 | +  | Sjp_0000990.1 | NA                    | NA       |
| HSB10kb_18 | 5     | 8067709  | 8163319  | SJC_S000002 | 18331   | 126213  | +  | Sjp_0001000.1 | NA                    | NA       |
| HSB10kb_18 | 5     | 8067709  | 8163319  | SJC_S000002 | 18331   | 126213  | +  | Sjp_0001010.1 | NA                    | NA       |
| EBR10kb_16 | "5,5" | NA       | NA       | SJC_S000002 | 126214  | 164007  | NA | Sjp_0001010.1 | NA                    | NA       |
| EBR10kb_16 | "5,5" | NA       | NA       | SJC_S000002 | 126214  | 164007  | NA | Sjp_0001020.1 | catalytic activity    | 0.035844 |
| HSB10kb_19 | 5     | 7678713  | 7701376  | SJC_S000002 | 164008  | 175654  |    | NA            | NA                    | NA       |
| EBR10kb_17 | "5,5" | NA       | NA       | SJC_S000002 | 175655  | 221678  | NA | Sjp_0001030.1 | catalytic activity    | 0.035844 |
| HSB10kb_20 | 5     | 7714226  | 7926284  | SJC_S000002 | 221679  | 485529  | -  | Sjp_0001040.1 | catalytic activity    | 0.035844 |
| HSB10kb_20 | 5     | 7714226  | 7926284  | SJC_S000002 | 221679  | 485529  | -  | Sjp_0001050.1 | NA                    | NA       |
| HSB10kb_20 | 5     | 7714226  | 7926284  | SJC_S000002 | 221679  | 485529  | -  | Sjp_0001060.1 | NA                    | NA       |
| HSB10kb_20 | 5     | 7714226  | 7926284  | SJC_S000002 | 221679  | 485529  | -  | Sjp_0001070.1 | NA                    | NA       |
| HSB10kb_20 | 5     | 7714226  | 7926284  | SJC_S000002 | 221679  | 485529  | -  | Sjp_0001080.1 | NA                    | NA       |
| HSB10kb_20 | 5     | 7714226  | 7926284  | SJC_S000002 | 221679  | 485529  | -  | Sjp_0001090.1 | NA                    | NA       |
| HSB10kb_20 | 5     | 7714226  | 7926284  | SJC_S000002 | 221679  | 485529  | -  | Sjp_0001100.1 | NA                    | NA       |
| HSB10kb_20 | 5     | 7714226  | 7926284  | SJC_S000002 | 221679  | 485529  | -  | Sjp_0001110.1 | NA                    | NA       |
| HSB10kb_20 | 5     | 7714226  | 7926284  | SJC_S000002 | 221679  | 485529  | -  | Sjp_0001120.1 | NA                    | NA       |
| EBR10kb_18 | "5,5" | NA       | NA       | SJC_S000002 | 485530  | 514904  | NA | Sjp_0001130.1 | NA                    | NA       |
| EBR10kb_18 | "5,5" | NA       | NA       | SJC_S000002 | 485530  | 514904  | NA | Sjp_0001140.1 | NA                    | NA       |
| HSB10kb_21 | 5     | 7627001  | 7664857  | SJC_S000002 | 514905  | 562402  | +  | Sjp_0001140.1 | NA                    | NA       |

|            |       |         |         |             |        |        |    |               |                       |          |
|------------|-------|---------|---------|-------------|--------|--------|----|---------------|-----------------------|----------|
| EBR10kb_19 | "5,5" | NA      | NA      | SJC_S000002 | 562403 | 589036 | NA | Sjp_0001150.1 | NA                    | NA       |
| EBR10kb_19 | "5,5" | NA      | NA      | SJC_S000002 | 562403 | 589036 | NA | Sjp_0001160.1 | NA                    | NA       |
| HSB10kb_22 | 5     | 7509245 | 7557003 | SJC_S000002 | 589037 | 646144 | -  | Sjp_0001160.1 | NA                    | NA       |
| HSB10kb_22 | 5     | 7509245 | 7557003 | SJC_S000002 | 589037 | 646144 | -  | Sjp_0001170.1 | biological regulation | 0.76396  |
| HSB10kb_22 | 5     | 7509245 | 7557003 | SJC_S000002 | 589037 | 646144 | -  | Sjp_0001180.1 | NA                    | NA       |
| EBR10kb_20 | "5,5" | NA      | NA      | SJC_S000002 | 646145 | 719971 | NA | Sjp_0001190.1 | NA                    | NA       |
| EBR10kb_20 | "5,5" | NA      | NA      | SJC_S000002 | 646145 | 719971 | NA | Sjp_0001200.1 | binding               | 0.052762 |
| HSB10kb_23 | 5     | 7356689 | 7376438 | SJC_S000002 | 719972 | 743079 | +  | Sjp_0001200.1 | binding               | 0.052762 |
| HSB10kb_23 | 5     | 7356689 | 7376438 | SJC_S000002 | 719972 | 743079 | +  | Sjp_0001210.1 | binding               | 0.052762 |
| unknown    | NA    | NA      | NA      | SJC_S000002 | NA     | NA     | NA | Sjp_0001220.1 | cell part             | 0.009037 |
| unknown    | NA    | NA      | NA      | SJC_S000002 | NA     | NA     | NA | Sjp_0001230.1 | NA                    | NA       |
| unknown    | NA    | NA      | NA      | SJC_S000002 | NA     | NA     | NA | Sjp_0001240.1 | biological regulation | 0.76396  |
| unknown    | NA    | NA      | NA      | SJC_S000002 | NA     | NA     | NA | Sjp_0001250.1 | cell part             | 0.009037 |
| unknown    | NA    | NA      | NA      | SJC_S000002 | NA     | NA     | NA | Sjp_0001260.1 | binding               | 0.052762 |
| unknown    | NA    | NA      | NA      | SJC_S000002 | NA     | NA     | NA | Sjp_0001270.1 | cell part             | 0.009037 |
| unknown    | NA    | NA      | NA      | SJC_S000002 | NA     | NA     | NA | Sjp_0001280.1 | NA                    | NA       |
| unknown    | NA    | NA      | NA      | SJC_S000002 | NA     | NA     | NA | Sjp_0001290.1 | NA                    | NA       |
| unknown    | NA    | NA      | NA      | SJC_S000002 | NA     | NA     | NA | Sjp_0001300.1 | NA                    | NA       |
| unknown    | NA    | NA      | NA      | SJC_S000002 | NA     | NA     | NA | Sjp_0001310.1 | cell part             | 0.009037 |
| unknown    | NA    | NA      | NA      | SJC_S000002 | NA     | NA     | NA | Sjp_0001320.1 | NA                    | NA       |
| unknown    | NA    | NA      | NA      | SJC_S000002 | NA     | NA     | NA | Sjp_0001330.1 | NA                    | NA       |
| unknown    | NA    | NA      | NA      | SJC_S000002 | NA     | NA     | NA | Sjp_0001340.1 | NA                    | NA       |
| unknown    | NA    | NA      | NA      | SJC_S000002 | NA     | NA     | NA | Sjp_0001350.1 | NA                    | NA       |
| unknown    | NA    | NA      | NA      | SJC_S000002 | NA     | NA     | NA | Sjp_0001360.1 | catalytic activity    | 0.035844 |
| unknown    | NA    | NA      | NA      | SJC_S000002 | NA     | NA     | NA | Sjp_0001370.1 | NA                    | NA       |
| unknown    | NA    | NA      | NA      | SJC_S000002 | NA     | NA     | NA | Sjp_0001380.1 | NA                    | NA       |
| unknown    | NA    | NA      | NA      | SJC_S000003 | NA     | NA     | NA | Sjp_0001390.1 | cell part             | 0.009037 |
| unknown    | NA    | NA      | NA      | SJC_S000003 | NA     | NA     | NA | Sjp_0001400.1 | binding               | 0.052762 |
| unknown    | NA    | NA      | NA      | SJC_S000003 | NA     | NA     | NA | Sjp_0001410.1 | NA                    | NA       |
| unknown    | NA    | NA      | NA      | SJC_S000003 | NA     | NA     | NA | Sjp_0001420.1 | NA                    | NA       |
| unknown    | NA    | NA      | NA      | SJC_S000003 | NA     | NA     | NA | Sjp_0001430.1 | NA                    | NA       |
| unknown    | NA    | NA      | NA      | SJC_S000003 | NA     | NA     | NA | Sjp_0001440.1 | NA                    | NA       |

|            |         |          |          |             |        |         |    |               |                                               |          |
|------------|---------|----------|----------|-------------|--------|---------|----|---------------|-----------------------------------------------|----------|
| unknown    | NA      | NA       | NA       | SJC_S000003 | NA     | NA      | NA | Sjp_0001450.1 | NA                                            | NA       |
| unknown    | NA      | NA       | NA       | SJC_S000003 | NA     | NA      | NA | Sjp_0001460.1 | biological regulation                         | 0.76396  |
| unknown    | NA      | NA       | NA       | SJC_S000003 | NA     | NA      | NA | Sjp_0001470.1 | NA                                            | NA       |
| unknown    | NA      | NA       | NA       | SJC_S000003 | NA     | NA      | NA | Sjp_0001480.1 | NA                                            | NA       |
| unknown    | NA      | NA       | NA       | SJC_S000003 | NA     | NA      | NA | Sjp_0001490.1 | NA                                            | NA       |
| unknown    | NA      | NA       | NA       | SJC_S000003 | NA     | NA      | NA | Sjp_0001500.1 | NA                                            | NA       |
| unknown    | NA      | NA       | NA       | SJC_S000003 | NA     | NA      | NA | Sjp_0001510.1 | NA                                            | NA       |
| unknown    | NA      | NA       | NA       | SJC_S000003 | NA     | NA      | NA | Sjp_0001520.1 | NA                                            | NA       |
| unknown    | NA      | NA       | NA       | SJC_S000003 | NA     | NA      | NA | Sjp_0001530.1 | binding                                       | 0.052762 |
| HSB10kb_24 | WZ      | 21708953 | 21774754 | SJC_S000003 | 454059 | 513683  | +  | Sjp_0001540.1 | NA                                            | NA       |
| HSB10kb_24 | WZ      | 21708953 | 21774754 | SJC_S000003 | 454059 | 513683  | +  | Sjp_0001550.1 | NA                                            | NA       |
| HSB10kb_24 | WZ      | 21708953 | 21774754 | SJC_S000003 | 454059 | 513683  | +  | Sjp_0001560.1 | cellular component organization or biogenesis | NA       |
| EBR10kb_21 | "WZ,WZ" | NA       | NA       | SJC_S000003 | 513684 | 533163  | NA | Sjp_0001560.1 | cellular component organization or biogenesis | NA       |
| HSB10kb_25 | WZ      | 21539424 | 21677821 | SJC_S000003 | 533164 | 681179  | -  | Sjp_0001580.1 | NA                                            | NA       |
| EBR10kb_22 | "WZ,WZ" | NA       | NA       | SJC_S000003 | 681180 | 800574  | NA | Sjp_0001590.1 | NA                                            | NA       |
| HSB10kb_26 | WZ      | 119211   | 713019   | SJC_S000003 | 800575 | 1411242 | +  | Sjp_0001600.1 | NA                                            | NA       |
| HSB10kb_26 | WZ      | 119211   | 713019   | SJC_S000003 | 800575 | 1411242 | +  | Sjp_0001610.1 | biological regulation                         | 0.76396  |
| HSB10kb_26 | WZ      | 119211   | 713019   | SJC_S000003 | 800575 | 1411242 | +  | Sjp_0001620.1 | NA                                            | NA       |
| HSB10kb_26 | WZ      | 119211   | 713019   | SJC_S000003 | 800575 | 1411242 | +  | Sjp_0001630.1 | NA                                            | NA       |
| HSB10kb_26 | WZ      | 119211   | 713019   | SJC_S000003 | 800575 | 1411242 | +  | Sjp_0001640.1 | NA                                            | NA       |
| HSB10kb_26 | WZ      | 119211   | 713019   | SJC_S000003 | 800575 | 1411242 | +  | Sjp_0001650.1 | NA                                            | NA       |
| HSB10kb_26 | WZ      | 119211   | 713019   | SJC_S000003 | 800575 | 1411242 | +  | Sjp_0001660.1 | NA                                            | NA       |
| HSB10kb_26 | WZ      | 119211   | 713019   | SJC_S000003 | 800575 | 1411242 | +  | Sjp_0001670.1 | catalytic activity                            | 0.035844 |
| HSB10kb_26 | WZ      | 119211   | 713019   | SJC_S000003 | 800575 | 1411242 | +  | Sjp_0001690.1 | NA                                            | NA       |
| HSB10kb_26 | WZ      | 119211   | 713019   | SJC_S000003 | 800575 | 1411242 | +  | Sjp_0001700.1 | NA                                            | NA       |
| HSB10kb_26 | WZ      | 119211   | 713019   | SJC_S000003 | 800575 | 1411242 | +  | Sjp_0001710.1 | NA                                            | NA       |

|            |       |         |         |             |        |         |    |               |                               |          |
|------------|-------|---------|---------|-------------|--------|---------|----|---------------|-------------------------------|----------|
| HSB10kb_26 | WZ    | 119211  | 713019  | SJC_S000003 | 800575 | 1411242 | +  | Sjp_0001720.1 | NA                            | NA       |
| HSB10kb_26 | WZ    | 119211  | 713019  | SJC_S000003 | 800575 | 1411242 | +  | Sjp_0001730.1 | NA                            | NA       |
| HSB10kb_26 | WZ    | 119211  | 713019  | SJC_S000003 | 800575 | 1411242 | +  | Sjp_0001740.1 | NA                            | NA       |
| HSB10kb_26 | WZ    | 119211  | 713019  | SJC_S000003 | 800575 | 1411242 | +  | Sjp_0001750.1 | NA                            | NA       |
| HSB10kb_26 | WZ    | 119211  | 713019  | SJC_S000003 | 800575 | 1411242 | +  | Sjp_0001760.1 | binding                       | 0.052762 |
| HSB10kb_26 | WZ    | 119211  | 713019  | SJC_S000003 | 800575 | 1411242 | +  | Sjp_0001770.1 | NA                            | NA       |
| unknown    | NA    | NA      | NA      | SJC_S000003 | NA     | NA      | NA | Sjp_0001780.1 | NA                            | NA       |
| unknown    | NA    | NA      | NA      | SJC_S000003 | NA     | NA      | NA | Sjp_0001790.1 | NA                            | NA       |
| unknown    | NA    | NA      | NA      | SJC_S000004 | NA     | NA      | NA | Sjp_0001800.1 | NA                            | NA       |
| unknown    | NA    | NA      | NA      | SJC_S000004 | NA     | NA      | NA | Sjp_0001810.1 | NA                            | NA       |
| unknown    | NA    | NA      | NA      | SJC_S000004 | NA     | NA      | NA | Sjp_0001830.1 | catalytic activity            | 0.035844 |
| unknown    | NA    | NA      | NA      | SJC_S000004 | NA     | NA      | NA | Sjp_0001840.1 | catalytic activity            | 0.035844 |
| unknown    | NA    | NA      | NA      | SJC_S000004 | NA     | NA      | NA | Sjp_0001850.1 | NA                            | NA       |
| unknown    | NA    | NA      | NA      | SJC_S000004 | NA     | NA      | NA | Sjp_0001860.1 | NA                            | NA       |
| unknown    | NA    | NA      | NA      | SJC_S000004 | NA     | NA      | NA | Sjp_0001870.1 | biological regulation         | 0.76396  |
| unknown    | NA    | NA      | NA      | SJC_S000004 | NA     | NA      | NA | Sjp_0001880.1 | molecular transducer activity | 0.50162  |
| unknown    | NA    | NA      | NA      | SJC_S000004 | NA     | NA      | NA | Sjp_0001890.1 | catalytic activity            | 0.035844 |
| unknown    | NA    | NA      | NA      | SJC_S000004 | NA     | NA      | NA | Sjp_0001900.1 | binding                       | 0.052762 |
| unknown    | NA    | NA      | NA      | SJC_S000004 | NA     | NA      | NA | Sjp_0001910.1 | NA                            | NA       |
| unknown    | NA    | NA      | NA      | SJC_S000004 | NA     | NA      | NA | Sjp_0001920.1 | binding                       | 0.052762 |
| unknown    | NA    | NA      | NA      | SJC_S000004 | NA     | NA      | NA | Sjp_0001930.1 | NA                            | NA       |
| HSB10kb_27 | 4     | 9398598 | 9422468 | SJC_S000004 | 332672 | 359246  | -  | Sjp_0001940.1 | NA                            | NA       |
| HSB10kb_27 | 4     | 9398598 | 9422468 | SJC_S000004 | 332672 | 359246  | -  | Sjp_0001950.1 | catalytic activity            | 0.035844 |
| EBR10kb_23 | "4,1" | NA      | NA      | SJC_S000004 | 359247 | 586909  | NA | Sjp_0001960.1 | cell part                     | 0.009037 |
| EBR10kb_23 | "4,1" | NA      | NA      | SJC_S000004 | 359247 | 586909  | NA | Sjp_0001970.1 | NA                            | NA       |
| EBR10kb_23 | "4,1" | NA      | NA      | SJC_S000004 | 359247 | 586909  | NA | Sjp_0001990.1 | NA                            | NA       |
| EBR10kb_23 | "4,1" | NA      | NA      | SJC_S000004 | 359247 | 586909  | NA | Sjp_0002000.1 | NA                            | NA       |
| EBR10kb_23 | "4,1" | NA      | NA      | SJC_S000004 | 359247 | 586909  | NA | Sjp_0002010.1 | NA                            | NA       |
| EBR10kb_23 | "4,1" | NA      | NA      | SJC_S000004 | 359247 | 586909  | NA | Sjp_0002020.1 | multi-organism process        | NA       |
| EBR10kb_23 | "4,1" | NA      | NA      | SJC_S000004 | 359247 | 586909  | NA | Sjp_0002030.1 | NA                            | NA       |



|            |       |          |          |             |         |         |    |               |                                               |          |
|------------|-------|----------|----------|-------------|---------|---------|----|---------------|-----------------------------------------------|----------|
| EBR10kb_23 | "4,1" | NA       | NA       | SJC_S000004 | 359247  | 586909  | NA | Sjp_0002040.1 | NA                                            | NA       |
| HSB10kb_28 | 1     | 12606022 | 12974509 | SJC_S000004 | 586910  | 1017751 | +  | Sjp_0002050.1 | cell part                                     | 0.009037 |
| HSB10kb_28 | 1     | 12606022 | 12974509 | SJC_S000004 | 586910  | 1017751 | +  | Sjp_0002060.1 | NA                                            | NA       |
| HSB10kb_28 | 1     | 12606022 | 12974509 | SJC_S000004 | 586910  | 1017751 | +  | Sjp_0002070.1 | biological regulation                         | 0.76396  |
| HSB10kb_28 | 1     | 12606022 | 12974509 | SJC_S000004 | 586910  | 1017751 | +  | Sjp_0002080.1 | transporter activity                          | 0.782    |
| HSB10kb_28 | 1     | 12606022 | 12974509 | SJC_S000004 | 586910  | 1017751 | +  | Sjp_0002090.1 | cellular process                              | 0.63852  |
| HSB10kb_28 | 1     | 12606022 | 12974509 | SJC_S000004 | 586910  | 1017751 | +  | Sjp_0002100.1 | transporter activity                          | 0.782    |
| HSB10kb_28 | 1     | 12606022 | 12974509 | SJC_S000004 | 586910  | 1017751 | +  | Sjp_0002110.1 | transporter activity                          | 0.782    |
| HSB10kb_28 | 1     | 12606022 | 12974509 | SJC_S000004 | 586910  | 1017751 | +  | Sjp_0002120.1 | NA                                            | NA       |
| HSB10kb_28 | 1     | 12606022 | 12974509 | SJC_S000004 | 586910  | 1017751 | +  | Sjp_0002130.1 | NA                                            | NA       |
| HSB10kb_28 | 1     | 12606022 | 12974509 | SJC_S000004 | 586910  | 1017751 | +  | Sjp_0002140.1 | catalytic activity                            | 0.035844 |
| HSB10kb_28 | 1     | 12606022 | 12974509 | SJC_S000004 | 586910  | 1017751 | +  | Sjp_0002150.1 | catalytic activity                            | 0.035844 |
| EBR10kb_24 | "1,3" | NA       | NA       | SJC_S000004 | 1017752 | 1090821 | NA | Sjp_0002150.1 | catalytic activity                            | 0.035844 |
| EBR10kb_24 | "1,3" | NA       | NA       | SJC_S000004 | 1017752 | 1090821 | NA | Sjp_0002160.1 | catalytic activity                            | 0.035844 |
| HSB10kb_29 | 3     | 5870358  | 5935779  | SJC_S000004 | 1090822 | 1194130 | +  | Sjp_0002160.1 | catalytic activity                            | 0.035844 |
| HSB10kb_29 | 3     | 5870358  | 5935779  | SJC_S000004 | 1090822 | 1194130 | +  | Sjp_0002170.1 | catalytic activity                            | 0.035844 |
| HSB10kb_29 | 3     | 5870358  | 5935779  | SJC_S000004 | 1090822 | 1194130 | +  | Sjp_0002180.1 | NA                                            | NA       |
| unknown    | NA    | NA       | NA       | SJC_S000005 | NA      | NA      | NA | Sjp_0002190.1 | NA                                            | NA       |
| unknown    | NA    | NA       | NA       | SJC_S000005 | NA      | NA      | NA | Sjp_0002200.1 | NA                                            | NA       |
| unknown    | NA    | NA       | NA       | SJC_S000005 | NA      | NA      | NA | Sjp_0002210.1 | NA                                            | NA       |
| unknown    | NA    | NA       | NA       | SJC_S000005 | NA      | NA      | NA | Sjp_0002220.1 | NA                                            | NA       |
| unknown    | NA    | NA       | NA       | SJC_S000005 | NA      | NA      | NA | Sjp_0002230.1 | NA                                            | NA       |
| unknown    | NA    | NA       | NA       | SJC_S000005 | NA      | NA      | NA | Sjp_0002240.1 | cellular component organization or biogenesis | NA       |
| unknown    | NA    | NA       | NA       | SJC_S000005 | NA      | NA      | NA | Sjp_0002250.1 | NA                                            | NA       |
| unknown    | NA    | NA       | NA       | SJC_S000005 | NA      | NA      | NA | Sjp_0002260.1 | cell part                                     | 0.009037 |
| unknown    | NA    | NA       | NA       | SJC_S000005 | NA      | NA      | NA | Sjp_0002270.1 | NA                                            | NA       |
| unknown    | NA    | NA       | NA       | SJC_S000005 | NA      | NA      | NA | Sjp_0002290.1 | cell part                                     | 0.009037 |

|            |        |          |          |             |         |         |    |               |                       |          |
|------------|--------|----------|----------|-------------|---------|---------|----|---------------|-----------------------|----------|
| unknown    | NA     | NA       | NA       | SJC_S000005 | NA      | NA      | NA | Sjp_0002300.1 | NA                    | NA       |
| unknown    | NA     | NA       | NA       | SJC_S000005 | NA      | NA      | NA | Sjp_0002310.1 | cell part             | 0.009037 |
| unknown    | NA     | NA       | NA       | SJC_S000005 | NA      | NA      | NA | Sjp_0002320.1 | NA                    | NA       |
| unknown    | NA     | NA       | NA       | SJC_S000005 | NA      | NA      | NA | Sjp_0002330.1 | binding               | 0.052762 |
| unknown    | NA     | NA       | NA       | SJC_S000005 | NA      | NA      | NA | Sjp_0002340.1 | NA                    | NA       |
| unknown    | NA     | NA       | NA       | SJC_S000005 | NA      | NA      | NA | Sjp_0002350.1 | binding               | 0.052762 |
| HSB10kb_30 | WZ     | 54231930 | 54408216 | SJC_S000005 | 596516  | 754969  | -  | Sjp_0002360.1 | binding               | 0.052762 |
| HSB10kb_30 | WZ     | 54231930 | 54408216 | SJC_S000005 | 596516  | 754969  | -  | Sjp_0002370.1 | NA                    | NA       |
| HSB10kb_30 | WZ     | 54231930 | 54408216 | SJC_S000005 | 596516  | 754969  | -  | Sjp_0002380.1 | catalytic activity    | 0.035844 |
| HSB10kb_30 | WZ     | 54231930 | 54408216 | SJC_S000005 | 596516  | 754969  | -  | Sjp_0002390.1 | NA                    | NA       |
| HSB10kb_30 | WZ     | 54231930 | 54408216 | SJC_S000005 | 596516  | 754969  | -  | Sjp_0002400.1 | NA                    | NA       |
| HSB10kb_30 | WZ     | 54231930 | 54408216 | SJC_S000005 | 596516  | 754969  | -  | Sjp_0002410.1 | biological regulation | 0.76396  |
| HSB10kb_30 | WZ     | 54231930 | 54408216 | SJC_S000005 | 596516  | 754969  | -  | Sjp_0002420.1 | NA                    | NA       |
| HSB10kb_30 | WZ     | 54231930 | 54408216 | SJC_S000005 | 596516  | 754969  | -  | Sjp_0002430.1 | cellular process      | 0.63852  |
| HSB10kb_30 | WZ     | 54231930 | 54408216 | SJC_S000005 | 596516  | 754969  | -  | Sjp_0002440.1 | NA                    | NA       |
| EBR10kb_25 | "WZ,2" | NA       | NA       | SJC_S000005 | 754970  | 1034547 | NA | Sjp_0002450.1 | NA                    | NA       |
| EBR10kb_25 | "WZ,2" | NA       | NA       | SJC_S000005 | 754970  | 1034547 | NA | Sjp_0002460.1 | NA                    | NA       |
| EBR10kb_25 | "WZ,2" | NA       | NA       | SJC_S000005 | 754970  | 1034547 | NA | Sjp_0002470.1 | NA                    | NA       |
| EBR10kb_25 | "WZ,2" | NA       | NA       | SJC_S000005 | 754970  | 1034547 | NA | Sjp_0002480.1 | NA                    | NA       |
| EBR10kb_25 | "WZ,2" | NA       | NA       | SJC_S000005 | 754970  | 1034547 | NA | Sjp_0002490.1 | catalytic activity    | 0.035844 |
| EBR10kb_25 | "WZ,2" | NA       | NA       | SJC_S000005 | 754970  | 1034547 | NA | Sjp_0002500.1 | NA                    | NA       |
| EBR10kb_25 | "WZ,2" | NA       | NA       | SJC_S000005 | 754970  | 1034547 | NA | Sjp_0002510.1 | response to stimulus  | NA       |
| EBR10kb_25 | "WZ,2" | NA       | NA       | SJC_S000005 | 754970  | 1034547 | NA | Sjp_0002520.1 | NA                    | NA       |
| EBR10kb_25 | "WZ,2" | NA       | NA       | SJC_S000005 | 754970  | 1034547 | NA | Sjp_0002530.1 | response to stimulus  | NA       |
| EBR10kb_25 | "WZ,2" | NA       | NA       | SJC_S000005 | 754970  | 1034547 | NA | Sjp_0002540.1 | NA                    | NA       |
| EBR10kb_25 | "WZ,2" | NA       | NA       | SJC_S000005 | 754970  | 1034547 | NA | Sjp_0002550.1 | NA                    | NA       |
| HSB10kb_31 | 2      | 2535426  | 2613616  | SJC_S000005 | 1034548 | 1110065 | +  | Sjp_0002560.1 | binding               | 0.052762 |
| HSB10kb_31 | 2      | 2535426  | 2613616  | SJC_S000005 | 1034548 | 1110065 | +  | Sjp_0002570.1 | biological regulation | 0.76396  |
| HSB10kb_31 | 2      | 2535426  | 2613616  | SJC_S000005 | 1034548 | 1110065 | +  | Sjp_0002580.1 | cellular process      | 0.63852  |
| unknown    | NA     | NA       | NA       | SJC_S000005 | NA      | NA      | NA | Sjp_0002590.1 | NA                    | NA       |

|            |    |          |          |             |        |        |    |               |                               |          |
|------------|----|----------|----------|-------------|--------|--------|----|---------------|-------------------------------|----------|
| unknown    | NA | NA       | NA       | SJC_S000005 | NA     | NA     | NA | Sjp_0002600.1 | NA                            | NA       |
| unknown    | NA | NA       | NA       | SJC_S000006 | NA     | NA     | NA | Sjp_0002610.1 | NA                            | NA       |
| unknown    | NA | NA       | NA       | SJC_S000006 | NA     | NA     | NA | Sjp_0002620.1 | NA                            | NA       |
| unknown    | NA | NA       | NA       | SJC_S000006 | NA     | NA     | NA | Sjp_0002630.1 | catalytic activity            | 0.035844 |
| unknown    | NA | NA       | NA       | SJC_S000006 | NA     | NA     | NA | Sjp_0002640.1 | NA                            | NA       |
| unknown    | NA | NA       | NA       | SJC_S000006 | NA     | NA     | NA | Sjp_0002650.1 | NA                            | NA       |
| unknown    | NA | NA       | NA       | SJC_S000006 | NA     | NA     | NA | Sjp_0002660.1 | developmental process         | NA       |
| unknown    | NA | NA       | NA       | SJC_S000006 | NA     | NA     | NA | Sjp_0002670.1 | NA                            | NA       |
| unknown    | NA | NA       | NA       | SJC_S000006 | NA     | NA     | NA | Sjp_0002680.1 | catalytic activity            | 0.035844 |
| unknown    | NA | NA       | NA       | SJC_S000006 | NA     | NA     | NA | Sjp_0002690.1 | cell part                     | 0.009037 |
| unknown    | NA | NA       | NA       | SJC_S000006 | NA     | NA     | NA | Sjp_0002700.1 | catalytic activity            | 0.035844 |
| unknown    | NA | NA       | NA       | SJC_S000006 | NA     | NA     | NA | Sjp_0002720.1 | NA                            | NA       |
| unknown    | NA | NA       | NA       | SJC_S000006 | NA     | NA     | NA | Sjp_0002730.1 | cell part                     | 0.009037 |
| HSB10kb_32 | 7  | 8844453  | 8865337  | SJC_S000006 | 492659 | 525479 | -  | Sjp_0002740.1 | molecular transducer activity | 0.50162  |
| HSB10kb_32 | 7  | 8844453  | 8865337  | SJC_S000006 | 492659 | 525479 | -  | Sjp_0002750.1 | binding                       | 0.052762 |
| HSB10kb_32 | 7  | 8844453  | 8865337  | SJC_S000006 | 492659 | 525479 | -  | Sjp_0002760.1 | cellular process              | 0.63852  |
| HSB10kb_32 | 7  | 8844453  | 8865337  | SJC_S000006 | 492659 | 525479 | -  | Sjp_0002770.1 | biological regulation         | 0.76396  |
| unknown    | NA | NA       | NA       | SJC_S000006 | NA     | NA     | NA | Sjp_0002780.1 | binding                       | 0.052762 |
| unknown    | NA | NA       | NA       | SJC_S000006 | NA     | NA     | NA | Sjp_0002790.1 | virion part                   | NA       |
| unknown    | NA | NA       | NA       | SJC_S000006 | NA     | NA     | NA | Sjp_0002800.1 | binding                       | 0.052762 |
| unknown    | NA | NA       | NA       | SJC_S000006 | NA     | NA     | NA | Sjp_0002810.1 | binding                       | 0.052762 |
| unknown    | NA | NA       | NA       | SJC_S000006 | NA     | NA     | NA | Sjp_0002830.1 | NA                            | NA       |
| unknown    | NA | NA       | NA       | SJC_S000006 | NA     | NA     | NA | Sjp_0002840.1 | biological regulation         | 0.76396  |
| unknown    | NA | NA       | NA       | SJC_S000006 | NA     | NA     | NA | Sjp_0002850.1 | biological regulation         | 0.76396  |
| unknown    | NA | NA       | NA       | SJC_S000006 | NA     | NA     | NA | Sjp_0002860.1 | NA                            | NA       |
| unknown    | NA | NA       | NA       | SJC_S000007 | NA     | NA     | NA | Sjp_0002870.1 | NA                            | NA       |
| HSB10kb_33 | 3  | 16432806 | 16572857 | SJC_S000007 | 22891  | 154282 | -  | Sjp_0002880.1 | NA                            | NA       |
| HSB10kb_33 | 3  | 16432806 | 16572857 | SJC_S000007 | 22891  | 154282 | -  | Sjp_0002890.1 | NA                            | NA       |

|            |        |          |          |             |        |        |    |               |                       |          |
|------------|--------|----------|----------|-------------|--------|--------|----|---------------|-----------------------|----------|
| HSB10kb_33 | 3      | 16432806 | 16572857 | SJC_S000007 | 22891  | 154282 | -  | Sjp_0002900.1 | immune system process | NA       |
| HSB10kb_33 | 3      | 16432806 | 16572857 | SJC_S000007 | 22891  | 154282 | -  | Sjp_0002910.1 | NA                    | NA       |
| HSB10kb_33 | 3      | 16432806 | 16572857 | SJC_S000007 | 22891  | 154282 | -  | Sjp_0002920.1 | NA                    | NA       |
| HSB10kb_33 | 3      | 16432806 | 16572857 | SJC_S000007 | 22891  | 154282 | -  | Sjp_0002930.1 | NA                    | NA       |
| EBR10kb_26 | "3,3"  | NA       | NA       | SJC_S000007 | 154283 | 165771 | NA | Sjp_0002930.1 | NA                    | NA       |
| EBR10kb_26 | "3,3"  | NA       | NA       | SJC_S000007 | 154283 | 165771 | NA | Sjp_0002940.1 | catalytic activity    | 0.035844 |
| HSB10kb_34 | 3      | 17620202 | 17646306 | SJC_S000007 | 165772 | 184179 | +  | Sjp_0002940.1 | catalytic activity    | 0.035844 |
| HSB10kb_34 | 3      | 17620202 | 17646306 | SJC_S000007 | 165772 | 184179 | +  | Sjp_0002950.1 | NA                    | NA       |
| HSB10kb_34 | 3      | 17620202 | 17646306 | SJC_S000007 | 165772 | 184179 | +  | Sjp_0002960.1 | NA                    | NA       |
| EBR10kb_27 | "3,3"  | NA       | NA       | SJC_S000007 | 184180 | 201118 | NA | Sjp_0002960.1 | NA                    | NA       |
| EBR10kb_27 | "3,3"  | NA       | NA       | SJC_S000007 | 184180 | 201118 | NA | Sjp_0002970.1 | biological regulation | 0.76396  |
| HSB10kb_35 | 3      | 17646822 | 17678335 | SJC_S000007 | 201119 | 225041 | -  | Sjp_0002970.1 | biological regulation | 0.76396  |
| HSB10kb_35 | 3      | 17646822 | 17678335 | SJC_S000007 | 201119 | 225041 | -  | Sjp_0002980.1 | developmental process | NA       |
| HSB10kb_35 | 3      | 17646822 | 17678335 | SJC_S000007 | 201119 | 225041 | -  | Sjp_0002990.1 | NA                    | NA       |
| EBR10kb_28 | "3,3"  | NA       | NA       | SJC_S000007 | 225042 | 258478 | NA | Sjp_0002990.1 | NA                    | NA       |
| HSB10kb_36 | 3      | 17714741 | 17919185 | SJC_S000007 | 258479 | 502312 | +  | Sjp_0002990.1 | NA                    | NA       |
| HSB10kb_36 | 3      | 17714741 | 17919185 | SJC_S000007 | 258479 | 502312 | +  | Sjp_0003000.1 | NA                    | NA       |
| HSB10kb_36 | 3      | 17714741 | 17919185 | SJC_S000007 | 258479 | 502312 | +  | Sjp_0003010.1 | NA                    | NA       |
| HSB10kb_36 | 3      | 17714741 | 17919185 | SJC_S000007 | 258479 | 502312 | +  | Sjp_0003020.1 | NA                    | NA       |
| HSB10kb_36 | 3      | 17714741 | 17919185 | SJC_S000007 | 258479 | 502312 | +  | Sjp_0003030.1 | developmental process | NA       |
| HSB10kb_36 | 3      | 17714741 | 17919185 | SJC_S000007 | 258479 | 502312 | +  | Sjp_0003040.1 | NA                    | NA       |
| HSB10kb_36 | 3      | 17714741 | 17919185 | SJC_S000007 | 258479 | 502312 | +  | Sjp_0003050.1 | NA                    | NA       |
| HSB10kb_36 | 3      | 17714741 | 17919185 | SJC_S000007 | 258479 | 502312 | +  | Sjp_0003060.1 | NA                    | NA       |
| EBR10kb_29 | "3,WZ" | NA       | NA       | SJC_S000007 | 502313 | 641145 | NA | Sjp_0003060.1 | NA                    | NA       |
| EBR10kb_29 | "3,WZ" | NA       | NA       | SJC_S000007 | 502313 | 641145 | NA | Sjp_0003070.1 | transporter activity  | 0.782    |
| EBR10kb_29 | "3,WZ" | NA       | NA       | SJC_S000007 | 502313 | 641145 | NA | Sjp_0003080.1 | NA                    | NA       |
| HSB10kb_37 | WZ     | 51543595 | 51605179 | SJC_S000007 | 641146 | 684693 | -  | Sjp_0003090.1 | cellular process      | 0.63852  |
| HSB10kb_37 | WZ     | 51543595 | 51605179 | SJC_S000007 | 641146 | 684693 | -  | Sjp_0003100.1 | biological            | 0.76396  |

|            |         |          |          |             |        |        |    |               |                           |          |
|------------|---------|----------|----------|-------------|--------|--------|----|---------------|---------------------------|----------|
|            |         |          |          |             |        |        |    |               | regulation                |          |
| HSB10kb_37 | WZ      | 51543595 | 51605179 | SJC_S000007 | 641146 | 684693 | -  | Sjp_0003110.1 | biological regulation     | 0.76396  |
| HSB10kb_37 | WZ      | 51543595 | 51605179 | SJC_S000007 | 641146 | 684693 | -  | Sjp_0003120.1 | NA                        | NA       |
| EBR10kb_30 | "WZ,WZ" | NA       | NA       | SJC_S000007 | 684694 | 704538 | NA | Sjp_0003130.1 | NA                        | NA       |
| HSB10kb_38 | WZ      | 53010051 | 53146167 | SJC_S000007 | 704539 | 807759 | +  | Sjp_0003140.1 | NA                        | NA       |
| HSB10kb_38 | WZ      | 53010051 | 53146167 | SJC_S000007 | 704539 | 807759 | +  | Sjp_0003150.1 | NA                        | NA       |
| HSB10kb_38 | WZ      | 53010051 | 53146167 | SJC_S000007 | 704539 | 807759 | +  | Sjp_0003160.1 | NA                        | NA       |
| HSB10kb_38 | WZ      | 53010051 | 53146167 | SJC_S000007 | 704539 | 807759 | +  | Sjp_0003170.1 | NA                        | NA       |
| HSB10kb_38 | WZ      | 53010051 | 53146167 | SJC_S000007 | 704539 | 807759 | +  | Sjp_0003180.1 | NA                        | NA       |
| HSB10kb_38 | WZ      | 53010051 | 53146167 | SJC_S000007 | 704539 | 807759 | +  | Sjp_0003190.1 | NA                        | NA       |
| HSB10kb_38 | WZ      | 53010051 | 53146167 | SJC_S000007 | 704539 | 807759 | +  | Sjp_0003200.1 | NA                        | NA       |
| EBR10kb_31 | "WZ,WZ" | NA       | NA       | SJC_S000007 | 807760 | 873789 | NA | Sjp_0003210.1 | NA                        | NA       |
| EBR10kb_31 | "WZ,WZ" | NA       | NA       | SJC_S000007 | 807760 | 873789 | NA | Sjp_0003220.1 | NA                        | NA       |
| HSB10kb_39 | WZ      | 53159941 | 53221232 | SJC_S000007 | 873790 | 941274 | -  | Sjp_0003230.1 | NA                        | NA       |
| HSB10kb_39 | WZ      | 53159941 | 53221232 | SJC_S000007 | 873790 | 941274 | -  | Sjp_0003240.1 | enzyme regulator activity | 0.1755   |
| unknown    | NA      | NA       | NA       | SJC_S000008 | NA     | NA     | NA | Sjp_0003250.1 | NA                        | NA       |
| HSB10kb_40 | 4       | 15015096 | 15082039 | SJC_S000008 | 51107  | 140114 | +  | Sjp_0003260.1 | NA                        | NA       |
| EBR10kb_32 | "4,4"   | NA       | NA       | SJC_S000008 | 140115 | 154833 | NA | Sjp_0003270.1 | NA                        | NA       |
| HSB10kb_41 | 4       | 15135396 | 15222171 | SJC_S000008 | 154834 | 232295 | -  | Sjp_0003270.1 | NA                        | NA       |
| HSB10kb_41 | 4       | 15135396 | 15222171 | SJC_S000008 | 154834 | 232295 | -  | Sjp_0003280.1 | NA                        | NA       |
| HSB10kb_41 | 4       | 15135396 | 15222171 | SJC_S000008 | 154834 | 232295 | -  | Sjp_0003290.1 | catalytic activity        | 0.035844 |
| EBR10kb_33 | "4,4"   | NA       | NA       | SJC_S000008 | 232296 | 376812 | NA | Sjp_0003300.1 | NA                        | NA       |
| EBR10kb_33 | "4,4"   | NA       | NA       | SJC_S000008 | 232296 | 376812 | NA | Sjp_0003310.1 | catalytic activity        | 0.035844 |
| EBR10kb_33 | "4,4"   | NA       | NA       | SJC_S000008 | 232296 | 376812 | NA | Sjp_0003320.1 | NA                        | NA       |
| EBR10kb_33 | "4,4"   | NA       | NA       | SJC_S000008 | 232296 | 376812 | NA | Sjp_0003330.1 | cell part                 | 0.009037 |
| HSB10kb_42 | 4       | 18846755 | 18902724 | SJC_S000008 | 376813 | 439307 | -  | Sjp_0003330.1 | cell part                 | 0.009037 |
| HSB10kb_42 | 4       | 18846755 | 18902724 | SJC_S000008 | 376813 | 439307 | -  | Sjp_0003340.1 | NA                        | NA       |
| HSB10kb_42 | 4       | 18846755 | 18902724 | SJC_S000008 | 376813 | 439307 | -  | Sjp_0003350.1 | NA                        | NA       |
| unknown    | NA      | NA       | NA       | SJC_S000008 | NA     | NA     | NA | Sjp_0003360.1 | NA                        | NA       |
| unknown    | NA      | NA       | NA       | SJC_S000008 | NA     | NA     | NA | Sjp_0003370.1 | NA                        | NA       |
| unknown    | NA      | NA       | NA       | SJC_S000008 | NA     | NA     | NA | Sjp_0003380.1 | NA                        | NA       |

|            |       |          |          |             |        |        |    |               |                                  |          |
|------------|-------|----------|----------|-------------|--------|--------|----|---------------|----------------------------------|----------|
| unknown    | NA    | NA       | NA       | SJC_S000008 | NA     | NA     | NA | Sjp_0003390.1 | multi-organism process           | NA       |
| unknown    | NA    | NA       | NA       | SJC_S000008 | NA     | NA     | NA | Sjp_0003400.1 | NA                               | NA       |
| unknown    | NA    | NA       | NA       | SJC_S000008 | NA     | NA     | NA | Sjp_0003410.1 | NA                               | NA       |
| unknown    | NA    | NA       | NA       | SJC_S000008 | NA     | NA     | NA | Sjp_0003420.1 | transcription regulator activity | NA       |
| unknown    | NA    | NA       | NA       | SJC_S000008 | NA     | NA     | NA | Sjp_0003430.1 | NA                               | NA       |
| unknown    | NA    | NA       | NA       | SJC_S000008 | NA     | NA     | NA | Sjp_0003440.1 | NA                               | NA       |
| unknown    | NA    | NA       | NA       | SJC_S000008 | NA     | NA     | NA | Sjp_0003450.1 | cell part                        | 0.009037 |
| unknown    | NA    | NA       | NA       | SJC_S000008 | NA     | NA     | NA | Sjp_0003460.1 | metabolic process                | 0.41934  |
| unknown    | NA    | NA       | NA       | SJC_S000008 | NA     | NA     | NA | Sjp_0003470.1 | NA                               | NA       |
| unknown    | NA    | NA       | NA       | SJC_S000008 | NA     | NA     | NA | Sjp_0003480.1 | binding                          | 0.052762 |
| unknown    | NA    | NA       | NA       | SJC_S000008 | NA     | NA     | NA | Sjp_0003490.1 | NA                               | NA       |
| unknown    | NA    | NA       | NA       | SJC_S000008 | NA     | NA     | NA | Sjp_0003500.1 | NA                               | NA       |
| unknown    | NA    | NA       | NA       | SJC_S000008 | NA     | NA     | NA | Sjp_0003510.1 | catalytic activity               | 0.035844 |
| HSB10kb_43 | 1     | 59879234 | 60231654 | SJC_S000009 | 4955   | 366048 | +  | Sjp_0003530.1 | catalytic activity               | 0.035844 |
| HSB10kb_43 | 1     | 59879234 | 60231654 | SJC_S000009 | 4955   | 366048 | +  | Sjp_0003540.1 | catalytic activity               | 0.035844 |
| HSB10kb_43 | 1     | 59879234 | 60231654 | SJC_S000009 | 4955   | 366048 | +  | Sjp_0003550.1 | catalytic activity               | 0.035844 |
| HSB10kb_43 | 1     | 59879234 | 60231654 | SJC_S000009 | 4955   | 366048 | +  | Sjp_0003560.1 | catalytic activity               | 0.035844 |
| HSB10kb_43 | 1     | 59879234 | 60231654 | SJC_S000009 | 4955   | 366048 | +  | Sjp_0003570.1 | NA                               | NA       |
| HSB10kb_43 | 1     | 59879234 | 60231654 | SJC_S000009 | 4955   | 366048 | +  | Sjp_0003580.1 | NA                               | NA       |
| HSB10kb_43 | 1     | 59879234 | 60231654 | SJC_S000009 | 4955   | 366048 | +  | Sjp_0003590.1 | NA                               | NA       |
| HSB10kb_43 | 1     | 59879234 | 60231654 | SJC_S000009 | 4955   | 366048 | +  | Sjp_0003610.1 | NA                               | NA       |
| HSB10kb_43 | 1     | 59879234 | 60231654 | SJC_S000009 | 4955   | 366048 | +  | Sjp_0003620.1 | catalytic activity               | 0.035844 |
| EBR10kb_34 | "1,1" | NA       | NA       | SJC_S000009 | 366049 | 379829 | NA | Sjp_0003620.1 | catalytic activity               | 0.035844 |
| HSB10kb_44 | 1     | 52107244 | 52144672 | SJC_S000009 | 379830 | 410151 | +  | Sjp_0003620.1 | catalytic activity               | 0.035844 |
| HSB10kb_44 | 1     | 52107244 | 52144672 | SJC_S000009 | 379830 | 410151 | +  | Sjp_0003630.1 | NA                               | NA       |
| EBR10kb_35 | "1,4" | NA       | NA       | SJC_S000009 | 410152 | 528334 | NA | Sjp_0003630.1 | NA                               | NA       |
| EBR10kb_35 | "1,4" | NA       | NA       | SJC_S000009 | 410152 | 528334 | NA | Sjp_0003640.1 | NA                               | NA       |
| EBR10kb_35 | "1,4" | NA       | NA       | SJC_S000009 | 410152 | 528334 | NA | Sjp_0003650.1 | biological regulation            | 0.76396  |
| EBR10kb_35 | "1,4" | NA       | NA       | SJC_S000009 | 410152 | 528334 | NA | Sjp_0003660.1 | NA                               | NA       |

|            |       |          |          |             |        |        |    |               |                           |          |
|------------|-------|----------|----------|-------------|--------|--------|----|---------------|---------------------------|----------|
| HSB10kb_45 | 4     | 20389889 | 20435828 | SJC_S000009 | 528335 | 543818 | -  | Sjp_0003670.1 | NA                        | NA       |
| EBR10kb_36 | "4,4" | NA       | NA       | SJC_S000009 | 543819 | 597767 | NA | Sjp_0003670.1 | NA                        | NA       |
| EBR10kb_36 | "4,4" | NA       | NA       | SJC_S000009 | 543819 | 597767 | NA | Sjp_0003690.1 | NA                        | NA       |
| HSB10kb_46 | 4     | 20265977 | 20295993 | SJC_S000009 | 597768 | 637307 | +  | Sjp_0003700.1 | catalytic activity        | 0.035844 |
| HSB10kb_46 | 4     | 20265977 | 20295993 | SJC_S000009 | 597768 | 637307 | +  | Sjp_0003710.1 | NA                        | NA       |
| unknown    | NA    | NA       | NA       | SJC_S000009 | NA     | NA     | NA | Sjp_0003720.1 | NA                        | NA       |
| unknown    | NA    | NA       | NA       | SJC_S000010 | NA     | NA     | NA | Sjp_0003730.1 | binding                   | 0.052762 |
| unknown    | NA    | NA       | NA       | SJC_S000010 | NA     | NA     | NA | Sjp_0003740.1 | binding                   | 0.052762 |
| HSB10kb_47 | 4     | 23748746 | 23970622 | SJC_S000010 | 84282  | 294678 | -  | Sjp_0003750.1 | extracellular region part | NA       |
| HSB10kb_47 | 4     | 23748746 | 23970622 | SJC_S000010 | 84282  | 294678 | -  | Sjp_0003760.1 | NA                        | NA       |
| HSB10kb_47 | 4     | 23748746 | 23970622 | SJC_S000010 | 84282  | 294678 | -  | Sjp_0003770.1 | binding                   | 0.052762 |
| HSB10kb_47 | 4     | 23748746 | 23970622 | SJC_S000010 | 84282  | 294678 | -  | Sjp_0003780.1 | transporter activity      | 0.782    |
| HSB10kb_47 | 4     | 23748746 | 23970622 | SJC_S000010 | 84282  | 294678 | -  | Sjp_0003790.1 | transporter activity      | 0.782    |
| HSB10kb_47 | 4     | 23748746 | 23970622 | SJC_S000010 | 84282  | 294678 | -  | Sjp_0003800.1 | NA                        | NA       |
| EBR10kb_37 | "4,4" | NA       | NA       | SJC_S000010 | 294679 | 305668 | NA | Sjp_0003800.1 | NA                        | NA       |
| HSB10kb_48 | 4     | 23733584 | 23746826 | SJC_S000010 | 305669 | 345594 | +  | Sjp_0003810.1 | NA                        | NA       |
| EBR10kb_38 | "4,4" | NA       | NA       | SJC_S000010 | 345595 | 351390 | NA | NA            | NA                        | NA       |
| HSB10kb_49 | 4     | 23193483 | 23690013 | SJC_S000010 | 351391 | 789945 | -  | Sjp_0003830.1 | transporter activity      | 0.782    |
| HSB10kb_49 | 4     | 23193483 | 23690013 | SJC_S000010 | 351391 | 789945 | -  | Sjp_0003840.1 | NA                        | NA       |
| HSB10kb_49 | 4     | 23193483 | 23690013 | SJC_S000010 | 351391 | 789945 | -  | Sjp_0003850.1 | NA                        | NA       |
| HSB10kb_49 | 4     | 23193483 | 23690013 | SJC_S000010 | 351391 | 789945 | -  | Sjp_0003860.1 | NA                        | NA       |
| HSB10kb_49 | 4     | 23193483 | 23690013 | SJC_S000010 | 351391 | 789945 | -  | Sjp_0003870.1 | response to stimulus      | NA       |
| HSB10kb_49 | 4     | 23193483 | 23690013 | SJC_S000010 | 351391 | 789945 | -  | Sjp_0003880.1 | NA                        | NA       |
| HSB10kb_49 | 4     | 23193483 | 23690013 | SJC_S000010 | 351391 | 789945 | -  | Sjp_0003890.1 | NA                        | NA       |
| EBR10kb_39 | "4,4" | NA       | NA       | SJC_S000010 | 789946 | 863743 | NA | Sjp_0003900.1 | NA                        | NA       |
| HSB10kb_50 | 4     | 23100244 | 23118896 | SJC_S000010 | 863744 | 881165 | -  | Sjp_0003910.1 | NA                        | NA       |
| HSB10kb_50 | 4     | 23100244 | 23118896 | SJC_S000010 | 863744 | 881165 | -  | Sjp_0003920.1 | NA                        | NA       |
| EBR10kb_40 | "4,4" | NA       | NA       | SJC_S000010 | 881166 | 885572 | NA | NA            | NA                        | NA       |
| HSB10kb_51 | 4     | 23060561 | 23088125 | SJC_S000010 | 885573 | 923940 | +  | Sjp_0003940.1 | catalytic activity        | 0.035844 |

|            |       |          |          |             |         |         |    |               |                    |          |
|------------|-------|----------|----------|-------------|---------|---------|----|---------------|--------------------|----------|
| EBR10kb_41 | "4,4" | NA       | NA       | SJC_S000010 | 923941  | 1003884 | NA | Sjp_0003950.1 | NA                 | NA       |
| EBR10kb_41 | "4,4" | NA       | NA       | SJC_S000010 | 923941  | 1003884 | NA | Sjp_0003960.1 | NA                 | NA       |
| EBR10kb_41 | "4,4" | NA       | NA       | SJC_S000010 | 923941  | 1003884 | NA | Sjp_0003970.1 | NA                 | NA       |
| EBR10kb_41 | "4,4" | NA       | NA       | SJC_S000010 | 923941  | 1003884 | NA | Sjp_0003980.1 | catalytic activity | 0.035844 |
| EBR10kb_41 | "4,4" | NA       | NA       | SJC_S000010 | 923941  | 1003884 | NA | Sjp_0003990.1 | NA                 | NA       |
| HSB10kb_52 | 4     | 26509126 | 26524425 | SJC_S000010 | 1003885 | 1016300 | +  | Sjp_0003990.1 | NA                 | NA       |
| EBR10kb_42 | "4,4" | NA       | NA       | SJC_S000010 | 1016301 | 1036132 | NA | Sjp_0004000.1 | NA                 | NA       |
| HSB10kb_53 | 4     | 26592672 | 26672233 | SJC_S000010 | 1036133 | 1136505 | -  | Sjp_0004000.1 | NA                 | NA       |
| HSB10kb_53 | 4     | 26592672 | 26672233 | SJC_S000010 | 1036133 | 1136505 | -  | Sjp_0004010.1 | NA                 | NA       |
| HSB10kb_53 | 4     | 26592672 | 26672233 | SJC_S000010 | 1036133 | 1136505 | -  | Sjp_0004020.1 | NA                 | NA       |
| HSB10kb_53 | 4     | 26592672 | 26672233 | SJC_S000010 | 1036133 | 1136505 | -  | Sjp_0004030.1 | NA                 | NA       |
| HSB10kb_53 | 4     | 26592672 | 26672233 | SJC_S000010 | 1036133 | 1136505 | -  | Sjp_0004040.1 | NA                 | NA       |
| unknown    | NA    | NA       | NA       | SJC_S000011 | NA      | NA      | NA | Sjp_0004050.1 | NA                 | NA       |
| HSB10kb_54 | 4     | 30095327 | 30335988 | SJC_S000011 | 16634   | 232435  | -  | Sjp_0004060.1 | cell part          | 0.009037 |
| HSB10kb_54 | 4     | 30095327 | 30335988 | SJC_S000011 | 16634   | 232435  | -  | Sjp_0004070.1 | NA                 | NA       |
| HSB10kb_54 | 4     | 30095327 | 30335988 | SJC_S000011 | 16634   | 232435  | -  | Sjp_0004090.1 | NA                 | NA       |
| HSB10kb_54 | 4     | 30095327 | 30335988 | SJC_S000011 | 16634   | 232435  | -  | Sjp_0004100.1 | NA                 | NA       |
| HSB10kb_54 | 4     | 30095327 | 30335988 | SJC_S000011 | 16634   | 232435  | -  | Sjp_0004110.1 | NA                 | NA       |
| HSB10kb_54 | 4     | 30095327 | 30335988 | SJC_S000011 | 16634   | 232435  | -  | Sjp_0004120.1 | binding            | 0.052762 |
| HSB10kb_54 | 4     | 30095327 | 30335988 | SJC_S000011 | 16634   | 232435  | -  | Sjp_0004130.1 | NA                 | NA       |
| EBR10kb_43 | "4,4" | NA       | NA       | SJC_S000011 | 232436  | 264300  | NA | NA            | NA                 | NA       |
| HSB10kb_55 | 4     | 29771224 | 30041891 | SJC_S000011 | 264301  | 506806  | -  | Sjp_0004150.1 | NA                 | NA       |
| HSB10kb_55 | 4     | 29771224 | 30041891 | SJC_S000011 | 264301  | 506806  | -  | Sjp_0004160.1 | NA                 | NA       |
| HSB10kb_55 | 4     | 29771224 | 30041891 | SJC_S000011 | 264301  | 506806  | -  | Sjp_0004170.1 | NA                 | NA       |
| HSB10kb_55 | 4     | 29771224 | 30041891 | SJC_S000011 | 264301  | 506806  | -  | Sjp_0004180.1 | binding            | 0.052762 |
| HSB10kb_55 | 4     | 29771224 | 30041891 | SJC_S000011 | 264301  | 506806  | -  | Sjp_0004190.1 | cell part          | 0.009037 |
| HSB10kb_55 | 4     | 29771224 | 30041891 | SJC_S000011 | 264301  | 506806  | -  | Sjp_0004200.1 | NA                 | NA       |
| HSB10kb_55 | 4     | 29771224 | 30041891 | SJC_S000011 | 264301  | 506806  | -  | Sjp_0004210.1 | NA                 | NA       |
| HSB10kb_55 | 4     | 29771224 | 30041891 | SJC_S000011 | 264301  | 506806  | -  | Sjp_0004220.1 | NA                 | NA       |
| EBR10kb_44 | "4,4" | NA       | NA       | SJC_S000011 | 506807  | 548235  | NA | Sjp_0004230.1 | catalytic activity | 0.035844 |
| HSB10kb_56 | 4     | 30057318 | 30080370 | SJC_S000011 | 548236  | 571795  | +  | Sjp_0004230.1 | catalytic activity | 0.035844 |
| HSB10kb_56 | 4     | 30057318 | 30080370 | SJC_S000011 | 548236  | 571795  | +  | Sjp_0004240.1 | NA                 | NA       |
| unknown    | NA    | NA       | NA       | SJC_S000011 | NA      | NA      | NA | Sjp_0004250.1 | NA                 | NA       |
| unknown    | NA    | NA       | NA       | SJC_S000011 | NA      | NA      | NA | Sjp_0004260.1 | NA                 | NA       |



|         |    |    |    |             |    |    |    |               |                                  |          |
|---------|----|----|----|-------------|----|----|----|---------------|----------------------------------|----------|
| unknown | NA | NA | NA | SJC_S000011 | NA | NA | NA | Sjp_0004270.1 | NA                               | NA       |
| unknown | NA | NA | NA | SJC_S000011 | NA | NA | NA | Sjp_0004280.1 | NA                               | NA       |
| unknown | NA | NA | NA | SJC_S000011 | NA | NA | NA | Sjp_0004290.1 | NA                               | NA       |
| unknown | NA | NA | NA | SJC_S000012 | NA | NA | NA | Sjp_0004300.1 | NA                               | NA       |
| unknown | NA | NA | NA | SJC_S000012 | NA | NA | NA | Sjp_0004310.1 | catalytic activity               | 0.035844 |
| unknown | NA | NA | NA | SJC_S000012 | NA | NA | NA | Sjp_0004320.1 | enzyme regulator activity        | 0.1755   |
| unknown | NA | NA | NA | SJC_S000012 | NA | NA | NA | Sjp_0004330.1 | enzyme regulator activity        | 0.1755   |
| unknown | NA | NA | NA | SJC_S000012 | NA | NA | NA | Sjp_0004340.1 | NA                               | NA       |
| unknown | NA | NA | NA | SJC_S000012 | NA | NA | NA | Sjp_0004350.1 | catalytic activity               | 0.035844 |
| unknown | NA | NA | NA | SJC_S000012 | NA | NA | NA | Sjp_0004360.1 | transporter activity             | 0.782    |
| unknown | NA | NA | NA | SJC_S000012 | NA | NA | NA | Sjp_0004370.1 | cell part                        | 0.009037 |
| unknown | NA | NA | NA | SJC_S000012 | NA | NA | NA | Sjp_0004380.1 | binding                          | 0.052762 |
| unknown | NA | NA | NA | SJC_S000012 | NA | NA | NA | Sjp_0004390.1 | transcription regulator activity | NA       |
| unknown | NA | NA | NA | SJC_S000012 | NA | NA | NA | Sjp_0004400.1 | catalytic activity               | 0.035844 |
| unknown | NA | NA | NA | SJC_S000012 | NA | NA | NA | Sjp_0004410.1 | catalytic activity               | 0.035844 |
| unknown | NA | NA | NA | SJC_S000012 | NA | NA | NA | Sjp_0004420.1 | NA                               | NA       |
| unknown | NA | NA | NA | SJC_S000012 | NA | NA | NA | Sjp_0004430.1 | NA                               | NA       |
| unknown | NA | NA | NA | SJC_S000012 | NA | NA | NA | Sjp_0004440.1 | NA                               | NA       |
| unknown | NA | NA | NA | SJC_S000012 | NA | NA | NA | Sjp_0004450.1 | biological regulation            | 0.76396  |
| unknown | NA | NA | NA | SJC_S000012 | NA | NA | NA | Sjp_0004460.1 | transporter activity             | 0.782    |
| unknown | NA | NA | NA | SJC_S000012 | NA | NA | NA | Sjp_0004470.1 | NA                               | NA       |
| unknown | NA | NA | NA | SJC_S000012 | NA | NA | NA | Sjp_0004480.1 | NA                               | NA       |
| unknown | NA | NA | NA | SJC_S000012 | NA | NA | NA | Sjp_0004490.1 | NA                               | NA       |
| unknown | NA | NA | NA | SJC_S000012 | NA | NA | NA | Sjp_0004500.1 | binding                          | 0.052762 |
| unknown | NA | NA | NA | SJC_S000012 | NA | NA | NA | Sjp_0004510.1 | NA                               | NA       |

|            |         |         |         |             |        |        |    |               |                       |          |
|------------|---------|---------|---------|-------------|--------|--------|----|---------------|-----------------------|----------|
| unknown    | NA      | NA      | NA      | SJC_S000013 | NA     | NA     | NA | Sjp_0004520.1 | NA                    | NA       |
| unknown    | NA      | NA      | NA      | SJC_S000013 | NA     | NA     | NA | Sjp_0004530.1 | biological regulation | 0.76396  |
| unknown    | NA      | NA      | NA      | SJC_S000013 | NA     | NA     | NA | Sjp_0004540.1 | NA                    | NA       |
| unknown    | NA      | NA      | NA      | SJC_S000013 | NA     | NA     | NA | Sjp_0004550.1 | NA                    | NA       |
| unknown    | NA      | NA      | NA      | SJC_S000013 | NA     | NA     | NA | Sjp_0004560.1 | NA                    | NA       |
| unknown    | NA      | NA      | NA      | SJC_S000013 | NA     | NA     | NA | Sjp_0004570.1 | NA                    | NA       |
| unknown    | NA      | NA      | NA      | SJC_S000013 | NA     | NA     | NA | Sjp_0004580.1 | NA                    | NA       |
| unknown    | NA      | NA      | NA      | SJC_S000013 | NA     | NA     | NA | Sjp_0004590.1 | NA                    | NA       |
| unknown    | NA      | NA      | NA      | SJC_S000013 | NA     | NA     | NA | Sjp_0004600.1 | NA                    | NA       |
| unknown    | NA      | NA      | NA      | SJC_S000013 | NA     | NA     | NA | Sjp_0004610.1 | NA                    | NA       |
| unknown    | NA      | NA      | NA      | SJC_S000013 | NA     | NA     | NA | Sjp_0004620.1 | NA                    | NA       |
| unknown    | NA      | NA      | NA      | SJC_S000014 | NA     | NA     | NA | Sjp_0004630.1 | NA                    | NA       |
| unknown    | NA      | NA      | NA      | SJC_S000014 | NA     | NA     | NA | Sjp_0004640.1 | NA                    | NA       |
| unknown    | NA      | NA      | NA      | SJC_S000014 | NA     | NA     | NA | Sjp_0004650.1 | NA                    | NA       |
| HSB10kb_57 | WZ      | 9114017 | 9200026 | SJC_S000014 | 69269  | 283677 | +  | Sjp_0004660.1 | NA                    | NA       |
| HSB10kb_57 | WZ      | 9114017 | 9200026 | SJC_S000014 | 69269  | 283677 | +  | Sjp_0004670.1 | catalytic activity    | 0.035844 |
| HSB10kb_57 | WZ      | 9114017 | 9200026 | SJC_S000014 | 69269  | 283677 | +  | Sjp_0004680.1 | NA                    | NA       |
| HSB10kb_57 | WZ      | 9114017 | 9200026 | SJC_S000014 | 69269  | 283677 | +  | Sjp_0004690.1 | transporter activity  | 0.782    |
| HSB10kb_57 | WZ      | 9114017 | 9200026 | SJC_S000014 | 69269  | 283677 | +  | Sjp_0004700.1 | NA                    | NA       |
| HSB10kb_57 | WZ      | 9114017 | 9200026 | SJC_S000014 | 69269  | 283677 | +  | Sjp_0004710.1 | metabolic process     | 0.41934  |
| HSB10kb_57 | WZ      | 9114017 | 9200026 | SJC_S000014 | 69269  | 283677 | +  | Sjp_0004720.1 | NA                    | NA       |
| HSB10kb_57 | WZ      | 9114017 | 9200026 | SJC_S000014 | 69269  | 283677 | +  | Sjp_0004730.1 | NA                    | NA       |
| EBR10kb_45 | "WZ,WZ" | NA      | NA      | SJC_S000014 | 283678 | 310579 | NA | Sjp_0004750.1 | NA                    | NA       |
| HSB10kb_58 | WZ      | 8957379 | 9068543 | SJC_S000014 | 310580 | 460595 | -  | Sjp_0004760.1 | NA                    | NA       |
| HSB10kb_58 | WZ      | 8957379 | 9068543 | SJC_S000014 | 310580 | 460595 | -  | Sjp_0004770.1 | NA                    | NA       |
| HSB10kb_58 | WZ      | 8957379 | 9068543 | SJC_S000014 | 310580 | 460595 | -  | Sjp_0004780.1 | NA                    | NA       |
| EBR10kb_46 | "WZ,WZ" | NA      | NA      | SJC_S000014 | 460596 | 477451 | NA | Sjp_0004790.1 | catalytic activity    | 0.035844 |
| HSB10kb_59 | WZ      | 8936412 | 8951783 | SJC_S000014 | 477452 | 505108 | +  | Sjp_0004800.1 | NA                    | NA       |
| HSB10kb_60 | 5       | 3234981 | 3300426 | SJC_S000015 | 8399   | 58679  | -  | Sjp_0004810.1 | NA                    | NA       |
| HSB10kb_60 | 5       | 3234981 | 3300426 | SJC_S000015 | 8399   | 58679  | -  | Sjp_0004820.1 | NA                    | NA       |
| HSB10kb_60 | 5       | 3234981 | 3300426 | SJC_S000015 | 8399   | 58679  | -  | Sjp_0004830.1 | catalytic activity    | 0.035844 |

|            |       |          |          |             |        |        |    |               |                                  |          |
|------------|-------|----------|----------|-------------|--------|--------|----|---------------|----------------------------------|----------|
| HSB10kb_60 | 5     | 3234981  | 3300426  | SJC_S000015 | 8399   | 58679  | -  | Sjp_0004840.1 | NA                               | NA       |
| unknown    | NA    | NA       | NA       | SJC_S000015 | NA     | NA     | NA | Sjp_0004850.1 | NA                               | NA       |
| unknown    | NA    | NA       | NA       | SJC_S000015 | NA     | NA     | NA | Sjp_0004860.1 | cellular process                 | 0.63852  |
| unknown    | NA    | NA       | NA       | SJC_S000015 | NA     | NA     | NA | Sjp_0004870.1 | NA                               | NA       |
| unknown    | NA    | NA       | NA       | SJC_S000015 | NA     | NA     | NA | Sjp_0004880.1 | NA                               | NA       |
| unknown    | NA    | NA       | NA       | SJC_S000015 | NA     | NA     | NA | Sjp_0004890.1 | NA                               | NA       |
| unknown    | NA    | NA       | NA       | SJC_S000015 | NA     | NA     | NA | Sjp_0004900.1 | NA                               | NA       |
| unknown    | NA    | NA       | NA       | SJC_S000015 | NA     | NA     | NA | Sjp_0004910.1 | NA                               | NA       |
| unknown    | NA    | NA       | NA       | SJC_S000015 | NA     | NA     | NA | Sjp_0004920.1 | NA                               | NA       |
| unknown    | NA    | NA       | NA       | SJC_S000015 | NA     | NA     | NA | Sjp_0004930.1 | NA                               | NA       |
| unknown    | NA    | NA       | NA       | SJC_S000015 | NA     | NA     | NA | Sjp_0004950.1 | transcription regulator activity | NA       |
| unknown    | NA    | NA       | NA       | SJC_S000015 | NA     | NA     | NA | Sjp_0004960.1 | cell part                        | 0.009037 |
| unknown    | NA    | NA       | NA       | SJC_S000015 | NA     | NA     | NA | Sjp_0004970.1 | NA                               | NA       |
| unknown    | NA    | NA       | NA       | SJC_S000015 | NA     | NA     | NA | Sjp_0004980.1 | NA                               | NA       |
| unknown    | NA    | NA       | NA       | SJC_S000015 | NA     | NA     | NA | Sjp_0004990.1 | NA                               | NA       |
| unknown    | NA    | NA       | NA       | SJC_S000015 | NA     | NA     | NA | Sjp_0005000.1 | NA                               | NA       |
| unknown    | NA    | NA       | NA       | SJC_S000015 | NA     | NA     | NA | Sjp_0005020.1 | catalytic activity               | 0.035844 |
| unknown    | NA    | NA       | NA       | SJC_S000015 | NA     | NA     | NA | Sjp_0005030.1 | NA                               | NA       |
| unknown    | NA    | NA       | NA       | SJC_S000015 | NA     | NA     | NA | Sjp_0005040.1 | NA                               | NA       |
| HSB10kb_61 | 2     | 11837329 | 12052745 | SJC_S000016 | 22583  | 224305 | +  | Sjp_0005050.1 | NA                               | NA       |
| HSB10kb_61 | 2     | 11837329 | 12052745 | SJC_S000016 | 22583  | 224305 | +  | Sjp_0005060.1 | NA                               | NA       |
| HSB10kb_61 | 2     | 11837329 | 12052745 | SJC_S000016 | 22583  | 224305 | +  | Sjp_0005070.1 | cellular process                 | 0.63852  |
| HSB10kb_61 | 2     | 11837329 | 12052745 | SJC_S000016 | 22583  | 224305 | +  | Sjp_0005080.1 | catalytic activity               | 0.035844 |
| HSB10kb_61 | 2     | 11837329 | 12052745 | SJC_S000016 | 22583  | 224305 | +  | Sjp_0005090.1 | NA                               | NA       |
| HSB10kb_61 | 2     | 11837329 | 12052745 | SJC_S000016 | 22583  | 224305 | +  | Sjp_0005100.1 | NA                               | NA       |
| HSB10kb_61 | 2     | 11837329 | 12052745 | SJC_S000016 | 22583  | 224305 | +  | Sjp_0005110.1 | NA                               | NA       |
| HSB10kb_61 | 2     | 11837329 | 12052745 | SJC_S000016 | 22583  | 224305 | +  | Sjp_0005120.1 | establishment of localization    | NA       |
| HSB10kb_61 | 2     | 11837329 | 12052745 | SJC_S000016 | 22583  | 224305 | +  | Sjp_0005130.1 | NA                               | NA       |
| HSB10kb_61 | 2     | 11837329 | 12052745 | SJC_S000016 | 22583  | 224305 | +  | Sjp_0005140.1 | cell part                        | 0.009037 |
| EBR10kb_47 | "2,2" | NA       | NA       | SJC_S000016 | 224306 | 236379 | NA | Sjp_0005140.1 | cell part                        | 0.009037 |
| EBR10kb_47 | "2,2" | NA       | NA       | SJC_S000016 | 224306 | 236379 | NA | Sjp_0005150.1 | NA                               | NA       |

|            |        |          |          |             |        |         |    |               |                       |          |
|------------|--------|----------|----------|-------------|--------|---------|----|---------------|-----------------------|----------|
| HSB10kb_62 | 2      | 10949999 | 11161569 | SJC_S000016 | 236380 | 481199  | -  | Sjp_0005150.1 | NA                    | NA       |
| HSB10kb_62 | 2      | 10949999 | 11161569 | SJC_S000016 | 236380 | 481199  | -  | Sjp_0005160.1 | transporter activity  | 0.782    |
| HSB10kb_62 | 2      | 10949999 | 11161569 | SJC_S000016 | 236380 | 481199  | -  | Sjp_0005170.1 | NA                    | NA       |
| HSB10kb_62 | 2      | 10949999 | 11161569 | SJC_S000016 | 236380 | 481199  | -  | Sjp_0005180.1 | NA                    | NA       |
| HSB10kb_62 | 2      | 10949999 | 11161569 | SJC_S000016 | 236380 | 481199  | -  | Sjp_0005200.1 | binding               | 0.052762 |
| HSB10kb_62 | 2      | 10949999 | 11161569 | SJC_S000016 | 236380 | 481199  | -  | Sjp_0005210.1 | catalytic activity    | 0.035844 |
| EBR10kb_48 | "2,2"  | NA       | NA       | SJC_S000016 | 481200 | 629757  | NA | Sjp_0005210.1 | catalytic activity    | 0.035844 |
| EBR10kb_48 | "2,2"  | NA       | NA       | SJC_S000016 | 481200 | 629757  | NA | Sjp_0005220.1 | binding               | 0.052762 |
| EBR10kb_48 | "2,2"  | NA       | NA       | SJC_S000016 | 481200 | 629757  | NA | Sjp_0005230.1 | NA                    | NA       |
| EBR10kb_48 | "2,2"  | NA       | NA       | SJC_S000016 | 481200 | 629757  | NA | Sjp_0005240.1 | biological regulation | 0.76396  |
| EBR10kb_48 | "2,2"  | NA       | NA       | SJC_S000016 | 481200 | 629757  | NA | Sjp_0005250.1 | catalytic activity    | 0.035844 |
| EBR10kb_48 | "2,2"  | NA       | NA       | SJC_S000016 | 481200 | 629757  | NA | Sjp_0005260.1 | binding               | 0.052762 |
| EBR10kb_48 | "2,2"  | NA       | NA       | SJC_S000016 | 481200 | 629757  | NA | Sjp_0005270.1 | NA                    | NA       |
| EBR10kb_48 | "2,2"  | NA       | NA       | SJC_S000016 | 481200 | 629757  | NA | Sjp_0005280.1 | transporter activity  | 0.782    |
| HSB10kb_63 | 2      | 3471121  | 3505745  | SJC_S000016 | 629758 | 723248  |    | NA            | NA                    | NA       |
| EBR10kb_49 | "2,2"  | NA       | NA       | SJC_S000016 | 723249 | 782901  | NA | Sjp_0005290.1 | NA                    | NA       |
| EBR10kb_49 | "2,2"  | NA       | NA       | SJC_S000016 | 723249 | 782901  | NA | Sjp_0005310.1 | NA                    | NA       |
| EBR10kb_49 | "2,2"  | NA       | NA       | SJC_S000016 | 723249 | 782901  | NA | Sjp_0005320.1 | NA                    | NA       |
| HSB10kb_64 | 2      | 3008385  | 3174173  | SJC_S000016 | 782902 | 939002  | +  | Sjp_0005320.1 | NA                    | NA       |
| HSB10kb_64 | 2      | 3008385  | 3174173  | SJC_S000016 | 782902 | 939002  | +  | Sjp_0005330.1 | NA                    | NA       |
| HSB10kb_64 | 2      | 3008385  | 3174173  | SJC_S000016 | 782902 | 939002  | +  | Sjp_0005340.1 | NA                    | NA       |
| HSB10kb_64 | 2      | 3008385  | 3174173  | SJC_S000016 | 782902 | 939002  | +  | Sjp_0005350.1 | catalytic activity    | 0.035844 |
| HSB10kb_64 | 2      | 3008385  | 3174173  | SJC_S000016 | 782902 | 939002  | +  | Sjp_0005360.1 | NA                    | NA       |
| EBR10kb_50 | "2,WZ" | NA       | NA       | SJC_S000016 | 939003 | 970787  | NA | NA            | NA                    | NA       |
| HSB10kb_65 | WZ     | 50726337 | 50836459 | SJC_S000016 | 970788 | 1007471 | +  | Sjp_0005370.1 | biological regulation | 0.76396  |
| HSB10kb_65 | WZ     | 50726337 | 50836459 | SJC_S000016 | 970788 | 1007471 | +  | Sjp_0005380.1 | NA                    | NA       |
| unknown    | NA     | NA       | NA       | SJC_S000016 | NA     | NA      | NA | Sjp_0005390.1 | NA                    | NA       |
| unknown    | NA     | NA       | NA       | SJC_S000016 | NA     | NA      | NA | Sjp_0005400.1 | metabolic process     | 0.41934  |
| unknown    | NA     | NA       | NA       | SJC_S000016 | NA     | NA      | NA | Sjp_0005410.1 | NA                    | NA       |

|            |       |          |          |             |       |        |    |               |                       |          |
|------------|-------|----------|----------|-------------|-------|--------|----|---------------|-----------------------|----------|
| unknown    | NA    | NA       | NA       | SJC_S000016 | NA    | NA     | NA | Sjp_0005420.1 | NA                    | NA       |
| unknown    | NA    | NA       | NA       | SJC_S000016 | NA    | NA     | NA | Sjp_0005430.1 | cell part             | 0.009037 |
| unknown    | NA    | NA       | NA       | SJC_S000016 | NA    | NA     | NA | Sjp_0005440.1 | NA                    | NA       |
| unknown    | NA    | NA       | NA       | SJC_S000016 | NA    | NA     | NA | Sjp_0005450.1 | NA                    | NA       |
| unknown    | NA    | NA       | NA       | SJC_S000016 | NA    | NA     | NA | Sjp_0005460.1 | NA                    | NA       |
| unknown    | NA    | NA       | NA       | SJC_S000017 | NA    | NA     | NA | Sjp_0005470.1 | binding               | 0.052762 |
| unknown    | NA    | NA       | NA       | SJC_S000017 | NA    | NA     | NA | Sjp_0005480.1 | catalytic activity    | 0.035844 |
| HSB10kb_66 | WZ    | 52386955 | 52780883 | SJC_S000017 | 81659 | 372053 | -  | Sjp_0005490.1 | cellular process      | 0.63852  |
| HSB10kb_66 | WZ    | 52386955 | 52780883 | SJC_S000017 | 81659 | 372053 | -  | Sjp_0005500.1 | NA                    | NA       |
| HSB10kb_66 | WZ    | 52386955 | 52780883 | SJC_S000017 | 81659 | 372053 | -  | Sjp_0005510.1 | NA                    | NA       |
| HSB10kb_66 | WZ    | 52386955 | 52780883 | SJC_S000017 | 81659 | 372053 | -  | Sjp_0005520.1 | catalytic activity    | 0.035844 |
| HSB10kb_66 | WZ    | 52386955 | 52780883 | SJC_S000017 | 81659 | 372053 | -  | Sjp_0005530.1 | binding               | 0.052762 |
| HSB10kb_66 | WZ    | 52386955 | 52780883 | SJC_S000017 | 81659 | 372053 | -  | Sjp_0005540.1 | NA                    | NA       |
| HSB10kb_66 | WZ    | 52386955 | 52780883 | SJC_S000017 | 81659 | 372053 | -  | Sjp_0005550.1 | NA                    | NA       |
| HSB10kb_66 | WZ    | 52386955 | 52780883 | SJC_S000017 | 81659 | 372053 | -  | Sjp_0005560.1 | NA                    | NA       |
| HSB10kb_66 | WZ    | 52386955 | 52780883 | SJC_S000017 | 81659 | 372053 | -  | Sjp_0005570.1 | transporter activity  | 0.782    |
| HSB10kb_66 | WZ    | 52386955 | 52780883 | SJC_S000017 | 81659 | 372053 | -  | Sjp_0005580.1 | NA                    | NA       |
| HSB10kb_66 | WZ    | 52386955 | 52780883 | SJC_S000017 | 81659 | 372053 | -  | Sjp_0005590.1 | transporter activity  | 0.782    |
| HSB10kb_66 | WZ    | 52386955 | 52780883 | SJC_S000017 | 81659 | 372053 | -  | Sjp_0005600.1 | NA                    | NA       |
| HSB10kb_66 | WZ    | 52386955 | 52780883 | SJC_S000017 | 81659 | 372053 | -  | Sjp_0005610.1 | NA                    | NA       |
| HSB10kb_66 | WZ    | 52386955 | 52780883 | SJC_S000017 | 81659 | 372053 | -  | Sjp_0005620.1 | transporter activity  | 0.782    |
| unknown    | NA    | NA       | NA       | SJC_S000017 | NA    | NA     | NA | Sjp_0005630.1 | NA                    | NA       |
| unknown    | NA    | NA       | NA       | SJC_S000017 | NA    | NA     | NA | Sjp_0005640.1 | catalytic activity    | 0.035844 |
| unknown    | NA    | NA       | NA       | SJC_S000017 | NA    | NA     | NA | Sjp_0005650.1 | NA                    | NA       |
| unknown    | NA    | NA       | NA       | SJC_S000017 | NA    | NA     | NA | Sjp_0005660.1 | binding               | 0.052762 |
| unknown    | NA    | NA       | NA       | SJC_S000017 | NA    | NA     | NA | Sjp_0005670.1 | NA                    | NA       |
| unknown    | NA    | NA       | NA       | SJC_S000017 | NA    | NA     | NA | Sjp_0005680.1 | NA                    | NA       |
| unknown    | NA    | NA       | NA       | SJC_S000017 | NA    | NA     | NA | Sjp_0005690.1 | biological regulation | 0.76396  |
| HSB10kb_67 | 3     | 15091666 | 15111120 | SJC_S000018 | 2573  | 26031  | -  | Sjp_0005710.1 | NA                    | NA       |
| EBR10kb_51 | "3,2" | NA       | NA       | SJC_S000018 | 26032 | 34822  | NA | Sjp_0005710.1 | NA                    | NA       |

|            |       |          |          |             |        |        |    |               |                           |          |
|------------|-------|----------|----------|-------------|--------|--------|----|---------------|---------------------------|----------|
| EBR10kb_51 | "3,2" | NA       | NA       | SJC_S000018 | 26032  | 34822  | NA | Sjp_0005720.1 | NA                        | NA       |
| HSB10kb_68 | 2     | 7095810  | 7285079  | SJC_S000018 | 34823  | 214024 | -  | Sjp_0005730.1 | NA                        | NA       |
| HSB10kb_68 | 2     | 7095810  | 7285079  | SJC_S000018 | 34823  | 214024 | -  | Sjp_0005740.1 | NA                        | NA       |
| HSB10kb_68 | 2     | 7095810  | 7285079  | SJC_S000018 | 34823  | 214024 | -  | Sjp_0005750.1 | catalytic activity        | 0.035844 |
| HSB10kb_68 | 2     | 7095810  | 7285079  | SJC_S000018 | 34823  | 214024 | -  | Sjp_0005760.1 | NA                        | NA       |
| HSB10kb_68 | 2     | 7095810  | 7285079  | SJC_S000018 | 34823  | 214024 | -  | Sjp_0005770.1 | NA                        | NA       |
| EBR10kb_52 | "2,2" | NA       | NA       | SJC_S000018 | 214025 | 232297 | NA | NA            | NA                        | NA       |
| HSB10kb_69 | 2     | 7305442  | 7431331  | SJC_S000018 | 232298 | 380691 | +  | Sjp_0005780.1 | enzyme regulator activity | 0.1755   |
| HSB10kb_69 | 2     | 7305442  | 7431331  | SJC_S000018 | 232298 | 380691 | +  | Sjp_0005790.1 | NA                        | NA       |
| HSB10kb_69 | 2     | 7305442  | 7431331  | SJC_S000018 | 232298 | 380691 | +  | Sjp_0005800.1 | NA                        | NA       |
| HSB10kb_69 | 2     | 7305442  | 7431331  | SJC_S000018 | 232298 | 380691 | +  | Sjp_0005810.1 | cell part                 | 0.009037 |
| HSB10kb_69 | 2     | 7305442  | 7431331  | SJC_S000018 | 232298 | 380691 | +  | Sjp_0005820.1 | cell part                 | 0.009037 |
| HSB10kb_69 | 2     | 7305442  | 7431331  | SJC_S000018 | 232298 | 380691 | +  | Sjp_0005830.1 | cell part                 | 0.009037 |
| HSB10kb_69 | 2     | 7305442  | 7431331  | SJC_S000018 | 232298 | 380691 | +  | Sjp_0005840.1 | cellular process          | 0.63852  |
| HSB10kb_69 | 2     | 7305442  | 7431331  | SJC_S000018 | 232298 | 380691 | +  | Sjp_0005850.1 | cell part                 | 0.009037 |
| EBR10kb_53 | "2,2" | NA       | NA       | SJC_S000018 | 380692 | 524249 | NA | Sjp_0005850.1 | cell part                 | 0.009037 |
| EBR10kb_53 | "2,2" | NA       | NA       | SJC_S000018 | 380692 | 524249 | NA | Sjp_0005860.1 | NA                        | NA       |
| EBR10kb_53 | "2,2" | NA       | NA       | SJC_S000018 | 380692 | 524249 | NA | Sjp_0005870.1 | NA                        | NA       |
| EBR10kb_53 | "2,2" | NA       | NA       | SJC_S000018 | 380692 | 524249 | NA | Sjp_0005880.1 | binding                   | 0.052762 |
| EBR10kb_53 | "2,2" | NA       | NA       | SJC_S000018 | 380692 | 524249 | NA | Sjp_0005890.1 | NA                        | NA       |
| EBR10kb_53 | "2,2" | NA       | NA       | SJC_S000018 | 380692 | 524249 | NA | Sjp_0005900.1 | cell part                 | 0.009037 |
| EBR10kb_53 | "2,2" | NA       | NA       | SJC_S000018 | 380692 | 524249 | NA | Sjp_0005910.1 | binding                   | 0.052762 |
| EBR10kb_53 | "2,2" | NA       | NA       | SJC_S000018 | 380692 | 524249 | NA | Sjp_0005920.1 | cellular process          | 0.63852  |
| HSB10kb_70 | 2     | 18455320 | 18823918 | SJC_S000018 | 524250 | 866108 | -  | Sjp_0005920.1 | cellular process          | 0.63852  |
| HSB10kb_70 | 2     | 18455320 | 18823918 | SJC_S000018 | 524250 | 866108 | -  | Sjp_0005930.1 | NA                        | NA       |
| HSB10kb_70 | 2     | 18455320 | 18823918 | SJC_S000018 | 524250 | 866108 | -  | Sjp_0005940.1 | NA                        | NA       |
| HSB10kb_70 | 2     | 18455320 | 18823918 | SJC_S000018 | 524250 | 866108 | -  | Sjp_0005950.1 | NA                        | NA       |
| HSB10kb_70 | 2     | 18455320 | 18823918 | SJC_S000018 | 524250 | 866108 | -  | Sjp_0005960.1 | NA                        | NA       |
| HSB10kb_70 | 2     | 18455320 | 18823918 | SJC_S000018 | 524250 | 866108 | -  | Sjp_0005970.1 | transporter activity      | 0.782    |
| HSB10kb_70 | 2     | 18455320 | 18823918 | SJC_S000018 | 524250 | 866108 | -  | Sjp_0005980.1 | NA                        | NA       |
| HSB10kb_70 | 2     | 18455320 | 18823918 | SJC_S000018 | 524250 | 866108 | -  | Sjp_0005990.1 | NA                        | NA       |

|            |         |          |          |             |        |         |    |               |                                               |          |
|------------|---------|----------|----------|-------------|--------|---------|----|---------------|-----------------------------------------------|----------|
| EBR10kb_54 | "2,2"   | NA       | NA       | SJC_S000018 | 866109 | 875557  | NA | Sjp_0005990.1 | NA                                            | NA       |
| EBR10kb_54 | "2,2"   | NA       | NA       | SJC_S000018 | 866109 | 875557  | NA | Sjp_0006000.1 | cell part                                     | 0.009037 |
| HSB10kb_71 | 2       | 18261294 | 18403327 | SJC_S000018 | 875558 | 1005150 | -  | Sjp_0006000.1 | cell part                                     | 0.009037 |
| HSB10kb_71 | 2       | 18261294 | 18403327 | SJC_S000018 | 875558 | 1005150 | -  | Sjp_0006010.1 | NA                                            | NA       |
| HSB10kb_71 | 2       | 18261294 | 18403327 | SJC_S000018 | 875558 | 1005150 | -  | Sjp_0006020.1 | NA                                            | NA       |
| HSB10kb_71 | 2       | 18261294 | 18403327 | SJC_S000018 | 875558 | 1005150 | -  | Sjp_0006030.1 | NA                                            | NA       |
| HSB10kb_72 | WZ      | 39775146 | 39882967 | SJC_S000019 | 17041  | 148391  | +  | Sjp_0006050.1 | NA                                            | NA       |
| EBR10kb_55 | "WZ,WZ" | NA       | NA       | SJC_S000019 | 148392 | 824264  | NA | Sjp_0006050.1 | NA                                            | NA       |
| EBR10kb_55 | "WZ,WZ" | NA       | NA       | SJC_S000019 | 148392 | 824264  | NA | Sjp_0006060.1 | transporter activity                          | 0.782    |
| EBR10kb_55 | "WZ,WZ" | NA       | NA       | SJC_S000019 | 148392 | 824264  | NA | Sjp_0006070.1 | transporter activity                          | 0.782    |
| EBR10kb_55 | "WZ,WZ" | NA       | NA       | SJC_S000019 | 148392 | 824264  | NA | Sjp_0006080.1 | cell part                                     | 0.009037 |
| EBR10kb_55 | "WZ,WZ" | NA       | NA       | SJC_S000019 | 148392 | 824264  | NA | Sjp_0006090.1 | NA                                            | NA       |
| EBR10kb_55 | "WZ,WZ" | NA       | NA       | SJC_S000019 | 148392 | 824264  | NA | Sjp_0006100.1 | NA                                            | NA       |
| EBR10kb_55 | "WZ,WZ" | NA       | NA       | SJC_S000019 | 148392 | 824264  | NA | Sjp_0006110.1 | NA                                            | NA       |
| EBR10kb_55 | "WZ,WZ" | NA       | NA       | SJC_S000019 | 148392 | 824264  | NA | Sjp_0006120.1 | NA                                            | NA       |
| EBR10kb_55 | "WZ,WZ" | NA       | NA       | SJC_S000019 | 148392 | 824264  | NA | Sjp_0006130.1 | NA                                            | NA       |
| EBR10kb_55 | "WZ,WZ" | NA       | NA       | SJC_S000019 | 148392 | 824264  | NA | Sjp_0006140.1 | biological regulation                         | 0.76396  |
| EBR10kb_55 | "WZ,WZ" | NA       | NA       | SJC_S000019 | 148392 | 824264  | NA | Sjp_0006150.1 | binding                                       | 0.052762 |
| EBR10kb_55 | "WZ,WZ" | NA       | NA       | SJC_S000019 | 148392 | 824264  | NA | Sjp_0006160.1 | protein binding transcription factor activity | NA       |
| EBR10kb_55 | "WZ,WZ" | NA       | NA       | SJC_S000019 | 148392 | 824264  | NA | Sjp_0006170.1 | NA                                            | NA       |
| EBR10kb_55 | "WZ,WZ" | NA       | NA       | SJC_S000019 | 148392 | 824264  | NA | Sjp_0006180.1 | NA                                            | NA       |
| EBR10kb_55 | "WZ,WZ" | NA       | NA       | SJC_S000019 | 148392 | 824264  | NA | Sjp_0006190.1 | NA                                            | NA       |
| EBR10kb_55 | "WZ,WZ" | NA       | NA       | SJC_S000019 | 148392 | 824264  | NA | Sjp_0006200.1 | biological regulation                         | 0.76396  |
| EBR10kb_55 | "WZ,WZ" | NA       | NA       | SJC_S000019 | 148392 | 824264  | NA | Sjp_0006210.1 | NA                                            | NA       |
| EBR10kb_55 | "WZ,WZ" | NA       | NA       | SJC_S000019 | 148392 | 824264  | NA | Sjp_0006220.1 | catalytic activity                            | 0.035844 |
| EBR10kb_55 | "WZ,WZ" | NA       | NA       | SJC_S000019 | 148392 | 824264  | NA | Sjp_0006230.1 | biological regulation                         | 0.76396  |
| EBR10kb_55 | "WZ,WZ" | NA       | NA       | SJC_S000019 | 148392 | 824264  | NA | Sjp_0006240.1 | catalytic activity                            | 0.035844 |

|            |       |          |          |             |        |         |    |               |                       |          |
|------------|-------|----------|----------|-------------|--------|---------|----|---------------|-----------------------|----------|
| HSB10kb_73 | WZ    | 59044863 | 59504413 | SJC_S000019 | 824265 | 1178201 | -  | Sjp_0006240.1 | catalytic activity    | 0.035844 |
| HSB10kb_73 | WZ    | 59044863 | 59504413 | SJC_S000019 | 824265 | 1178201 | -  | Sjp_0006250.1 | biological regulation | 0.76396  |
| HSB10kb_73 | WZ    | 59044863 | 59504413 | SJC_S000019 | 824265 | 1178201 | -  | Sjp_0006260.1 | NA                    | NA       |
| HSB10kb_73 | WZ    | 59044863 | 59504413 | SJC_S000019 | 824265 | 1178201 | -  | Sjp_0006270.1 | NA                    | NA       |
| HSB10kb_73 | WZ    | 59044863 | 59504413 | SJC_S000019 | 824265 | 1178201 | -  | Sjp_0006290.1 | NA                    | NA       |
| HSB10kb_73 | WZ    | 59044863 | 59504413 | SJC_S000019 | 824265 | 1178201 | -  | Sjp_0006300.1 | catalytic activity    | 0.035844 |
| HSB10kb_73 | WZ    | 59044863 | 59504413 | SJC_S000019 | 824265 | 1178201 | -  | Sjp_0006310.1 | NA                    | NA       |
| HSB10kb_73 | WZ    | 59044863 | 59504413 | SJC_S000019 | 824265 | 1178201 | -  | Sjp_0006320.1 | NA                    | NA       |
| HSB10kb_73 | WZ    | 59044863 | 59504413 | SJC_S000019 | 824265 | 1178201 | -  | Sjp_0006330.1 | biological regulation | 0.76396  |
| HSB10kb_73 | WZ    | 59044863 | 59504413 | SJC_S000019 | 824265 | 1178201 | -  | Sjp_0006340.1 | biological regulation | 0.76396  |
| unknown    | NA    | NA       | NA       | SJC_S000020 | NA     | NA      | NA | Sjp_0006350.1 | NA                    | NA       |
| unknown    | NA    | NA       | NA       | SJC_S000020 | NA     | NA      | NA | Sjp_0006360.1 | NA                    | NA       |
| unknown    | NA    | NA       | NA       | SJC_S000020 | NA     | NA      | NA | Sjp_0006370.1 | biological regulation | 0.76396  |
| unknown    | NA    | NA       | NA       | SJC_S000020 | NA     | NA      | NA | Sjp_0006380.1 | NA                    | NA       |
| HSB10kb_74 | 2     | 5666039  | 5912609  | SJC_S000020 | 145426 | 398980  | +  | Sjp_0006390.1 | NA                    | NA       |
| HSB10kb_74 | 2     | 5666039  | 5912609  | SJC_S000020 | 145426 | 398980  | +  | Sjp_0006400.1 | NA                    | NA       |
| HSB10kb_74 | 2     | 5666039  | 5912609  | SJC_S000020 | 145426 | 398980  | +  | Sjp_0006410.1 | NA                    | NA       |
| HSB10kb_74 | 2     | 5666039  | 5912609  | SJC_S000020 | 145426 | 398980  | +  | Sjp_0006420.1 | NA                    | NA       |
| HSB10kb_74 | 2     | 5666039  | 5912609  | SJC_S000020 | 145426 | 398980  | +  | Sjp_0006440.1 | NA                    | NA       |
| HSB10kb_74 | 2     | 5666039  | 5912609  | SJC_S000020 | 145426 | 398980  | +  | Sjp_0006450.1 | NA                    | NA       |
| HSB10kb_74 | 2     | 5666039  | 5912609  | SJC_S000020 | 145426 | 398980  | +  | Sjp_0006460.1 | catalytic activity    | 0.035844 |
| HSB10kb_74 | 2     | 5666039  | 5912609  | SJC_S000020 | 145426 | 398980  | +  | Sjp_0006470.1 | cell part             | 0.009037 |
| EBR10kb_56 | "2,2" | NA       | NA       | SJC_S000020 | 398981 | 610521  | NA | Sjp_0006470.1 | cell part             | 0.009037 |
| EBR10kb_56 | "2,2" | NA       | NA       | SJC_S000020 | 398981 | 610521  | NA | Sjp_0006480.1 | NA                    | NA       |
| EBR10kb_56 | "2,2" | NA       | NA       | SJC_S000020 | 398981 | 610521  | NA | Sjp_0006490.1 | NA                    | NA       |
| EBR10kb_56 | "2,2" | NA       | NA       | SJC_S000020 | 398981 | 610521  | NA | Sjp_0006500.1 | NA                    | NA       |
| HSB10kb_75 | 2     | 7911361  | 8060917  | SJC_S000020 | 610522 | 773328  | -  | Sjp_0006510.1 | NA                    | NA       |
| HSB10kb_75 | 2     | 7911361  | 8060917  | SJC_S000020 | 610522 | 773328  | -  | Sjp_0006520.1 | catalytic activity    | 0.035844 |
| HSB10kb_75 | 2     | 7911361  | 8060917  | SJC_S000020 | 610522 | 773328  | -  | Sjp_0006530.1 | NA                    | NA       |
| HSB10kb_75 | 2     | 7911361  | 8060917  | SJC_S000020 | 610522 | 773328  | -  | Sjp_0006540.1 | catalytic activity    | 0.035844 |



|            |       |          |          |             |        |         |    |               |                                               |          |
|------------|-------|----------|----------|-------------|--------|---------|----|---------------|-----------------------------------------------|----------|
| HSB10kb_76 | 1     | 34258565 | 34611149 | SJC_S000021 | 7879   | 391945  | +  | Sjp_0006550.1 | multicellular organismal process              | NA       |
| HSB10kb_76 | 1     | 34258565 | 34611149 | SJC_S000021 | 7879   | 391945  | +  | Sjp_0006560.1 | NA                                            | NA       |
| HSB10kb_76 | 1     | 34258565 | 34611149 | SJC_S000021 | 7879   | 391945  | +  | Sjp_0006570.1 | NA                                            | NA       |
| HSB10kb_76 | 1     | 34258565 | 34611149 | SJC_S000021 | 7879   | 391945  | +  | Sjp_0006580.1 | NA                                            | NA       |
| HSB10kb_76 | 1     | 34258565 | 34611149 | SJC_S000021 | 7879   | 391945  | +  | Sjp_0006590.1 | binding                                       | 0.052762 |
| HSB10kb_76 | 1     | 34258565 | 34611149 | SJC_S000021 | 7879   | 391945  | +  | Sjp_0006600.1 | NA                                            | NA       |
| HSB10kb_76 | 1     | 34258565 | 34611149 | SJC_S000021 | 7879   | 391945  | +  | Sjp_0006610.1 | NA                                            | NA       |
| HSB10kb_76 | 1     | 34258565 | 34611149 | SJC_S000021 | 7879   | 391945  | +  | Sjp_0006620.1 | protein binding transcription factor activity | NA       |
| HSB10kb_76 | 1     | 34258565 | 34611149 | SJC_S000021 | 7879   | 391945  | +  | Sjp_0006630.1 | metabolic process                             | 0.41934  |
| EBR10kb_57 | "1,1" | NA       | NA       | SJC_S000021 | 391946 | 452565  | NA | Sjp_0006630.1 | metabolic process                             | 0.41934  |
| EBR10kb_57 | "1,1" | NA       | NA       | SJC_S000021 | 391946 | 452565  | NA | Sjp_0006640.1 | catalytic activity                            | 0.035844 |
| HSB10kb_77 | 1     | 34750196 | 34963456 | SJC_S000021 | 452566 | 772030  | +  | Sjp_0006640.1 | catalytic activity                            | 0.035844 |
| HSB10kb_77 | 1     | 34750196 | 34963456 | SJC_S000021 | 452566 | 772030  | +  | Sjp_0006650.1 | transporter activity                          | 0.782    |
| HSB10kb_77 | 1     | 34750196 | 34963456 | SJC_S000021 | 452566 | 772030  | +  | Sjp_0006660.1 | NA                                            | NA       |
| HSB10kb_77 | 1     | 34750196 | 34963456 | SJC_S000021 | 452566 | 772030  | +  | Sjp_0006670.1 | NA                                            | NA       |
| HSB10kb_77 | 1     | 34750196 | 34963456 | SJC_S000021 | 452566 | 772030  | +  | Sjp_0006680.1 | establishment of localization                 | NA       |
| HSB10kb_77 | 1     | 34750196 | 34963456 | SJC_S000021 | 452566 | 772030  | +  | Sjp_0006690.1 | binding                                       | 0.052762 |
| HSB10kb_77 | 1     | 34750196 | 34963456 | SJC_S000021 | 452566 | 772030  | +  | Sjp_0006700.1 | catalytic activity                            | 0.035844 |
| HSB10kb_77 | 1     | 34750196 | 34963456 | SJC_S000021 | 452566 | 772030  | +  | Sjp_0006710.1 | NA                                            | NA       |
| HSB10kb_77 | 1     | 34750196 | 34963456 | SJC_S000021 | 452566 | 772030  | +  | Sjp_0006720.1 | transporter activity                          | 0.782    |
| EBR10kb_58 | "1,3" | NA       | NA       | SJC_S000021 | 772031 | 813360  | NA | Sjp_0006730.1 | NA                                            | NA       |
| EBR10kb_58 | "1,3" | NA       | NA       | SJC_S000021 | 772031 | 813360  | NA | Sjp_0006740.1 | NA                                            | NA       |
| EBR10kb_58 | "1,3" | NA       | NA       | SJC_S000021 | 772031 | 813360  | NA | Sjp_0006750.1 | NA                                            | NA       |
| HSB10kb_78 | 3     | 12603971 | 12885680 | SJC_S000021 | 813361 | 1075596 | -  | Sjp_0006750.1 | NA                                            | NA       |
| HSB10kb_78 | 3     | 12603971 | 12885680 | SJC_S000021 | 813361 | 1075596 | -  | Sjp_0006760.1 | NA                                            | NA       |

|            |       |          |          |             |        |         |    |               |                       |          |
|------------|-------|----------|----------|-------------|--------|---------|----|---------------|-----------------------|----------|
| HSB10kb_78 | 3     | 12603971 | 12885680 | SJC_S000021 | 813361 | 1075596 | -  | Sjp_0006770.1 | biological regulation | 0.76396  |
| HSB10kb_78 | 3     | 12603971 | 12885680 | SJC_S000021 | 813361 | 1075596 | -  | Sjp_0006780.1 | NA                    | NA       |
| HSB10kb_78 | 3     | 12603971 | 12885680 | SJC_S000021 | 813361 | 1075596 | -  | Sjp_0006790.1 | NA                    | NA       |
| HSB10kb_78 | 3     | 12603971 | 12885680 | SJC_S000021 | 813361 | 1075596 | -  | Sjp_0006800.1 | NA                    | NA       |
| HSB10kb_78 | 3     | 12603971 | 12885680 | SJC_S000021 | 813361 | 1075596 | -  | Sjp_0006810.1 | NA                    | NA       |
| HSB10kb_78 | 3     | 12603971 | 12885680 | SJC_S000021 | 813361 | 1075596 | -  | Sjp_0006820.1 | NA                    | NA       |
| HSB10kb_78 | 3     | 12603971 | 12885680 | SJC_S000021 | 813361 | 1075596 | -  | Sjp_0006830.1 | NA                    | NA       |
| HSB10kb_78 | 3     | 12603971 | 12885680 | SJC_S000021 | 813361 | 1075596 | -  | Sjp_0006840.1 | NA                    | NA       |
| HSB10kb_78 | 3     | 12603971 | 12885680 | SJC_S000021 | 813361 | 1075596 | -  | Sjp_0006850.1 | cell part             | 0.009037 |
| HSB10kb_78 | 3     | 12603971 | 12885680 | SJC_S000021 | 813361 | 1075596 | -  | Sjp_0006860.1 | NA                    | NA       |
| unknown    | NA    | NA       | NA       | SJC_S000022 | NA     | NA      | NA | Sjp_0006870.1 | cell part             | 0.009037 |
| unknown    | NA    | NA       | NA       | SJC_S000022 | NA     | NA      | NA | Sjp_0006880.1 | NA                    | NA       |
| unknown    | NA    | NA       | NA       | SJC_S000022 | NA     | NA      | NA | Sjp_0006890.1 | NA                    | NA       |
| unknown    | NA    | NA       | NA       | SJC_S000022 | NA     | NA      | NA | Sjp_0006900.1 | catalytic activity    | 0.035844 |
| unknown    | NA    | NA       | NA       | SJC_S000022 | NA     | NA      | NA | Sjp_0006910.1 | cellular process      | 0.63852  |
| unknown    | NA    | NA       | NA       | SJC_S000022 | NA     | NA      | NA | Sjp_0006920.1 | NA                    | NA       |
| unknown    | NA    | NA       | NA       | SJC_S000022 | NA     | NA      | NA | Sjp_0006930.1 | biological regulation | 0.76396  |
| unknown    | NA    | NA       | NA       | SJC_S000022 | NA     | NA      | NA | Sjp_0006940.1 | NA                    | NA       |
| unknown    | NA    | NA       | NA       | SJC_S000022 | NA     | NA      | NA | Sjp_0006950.1 | cell part             | 0.009037 |
| unknown    | NA    | NA       | NA       | SJC_S000022 | NA     | NA      | NA | Sjp_0006960.1 | NA                    | NA       |
| unknown    | NA    | NA       | NA       | SJC_S000022 | NA     | NA      | NA | Sjp_0006970.1 | NA                    | NA       |
| unknown    | NA    | NA       | NA       | SJC_S000022 | NA     | NA      | NA | Sjp_0006980.1 | NA                    | NA       |
| unknown    | NA    | NA       | NA       | SJC_S000022 | NA     | NA      | NA | Sjp_0006990.1 | NA                    | NA       |
| unknown    | NA    | NA       | NA       | SJC_S000022 | NA     | NA      | NA | Sjp_0007000.1 | cell part             | 0.009037 |
| HSB10kb_79 | 3     | 6446730  | 6668279  | SJC_S000022 | 335534 | 563036  | +  | Sjp_0007010.1 | NA                    | NA       |
| HSB10kb_79 | 3     | 6446730  | 6668279  | SJC_S000022 | 335534 | 563036  | +  | Sjp_0007030.1 | cell part             | 0.009037 |
| HSB10kb_79 | 3     | 6446730  | 6668279  | SJC_S000022 | 335534 | 563036  | +  | Sjp_0007040.1 | binding               | 0.052762 |
| HSB10kb_79 | 3     | 6446730  | 6668279  | SJC_S000022 | 335534 | 563036  | +  | Sjp_0007050.1 | NA                    | NA       |
| HSB10kb_79 | 3     | 6446730  | 6668279  | SJC_S000022 | 335534 | 563036  | +  | Sjp_0007060.1 | NA                    | NA       |
| HSB10kb_79 | 3     | 6446730  | 6668279  | SJC_S000022 | 335534 | 563036  | +  | Sjp_0007070.1 | cell part             | 0.009037 |
| EBR10kb_59 | "3,3" | NA       | NA       | SJC_S000022 | 563037 | 692437  | NA | Sjp_0007080.1 | NA                    | NA       |
| EBR10kb_59 | "3,3" | NA       | NA       | SJC_S000022 | 563037 | 692437  | NA | Sjp_0007090.1 | NA                    | NA       |

|            |       |         |         |             |        |        |    |               |                               |          |
|------------|-------|---------|---------|-------------|--------|--------|----|---------------|-------------------------------|----------|
| EBR10kb_59 | "3,3" | NA      | NA      | SJC_S000022 | 563037 | 692437 | NA | Sjp_0007100.1 | NA                            | NA       |
| EBR10kb_59 | "3,3" | NA      | NA      | SJC_S000022 | 563037 | 692437 | NA | Sjp_0007110.1 | establishment of localization | NA       |
| EBR10kb_59 | "3,3" | NA      | NA      | SJC_S000022 | 563037 | 692437 | NA | Sjp_0007120.1 | establishment of localization | NA       |
| EBR10kb_59 | "3,3" | NA      | NA      | SJC_S000022 | 563037 | 692437 | NA | Sjp_0007130.1 | NA                            | NA       |
| HSB10kb_80 | 3     | 6178073 | 6433245 | SJC_S000022 | 692438 | 937867 | +  | Sjp_0007130.1 | NA                            | NA       |
| HSB10kb_80 | 3     | 6178073 | 6433245 | SJC_S000022 | 692438 | 937867 | +  | Sjp_0007140.1 | NA                            | NA       |
| HSB10kb_80 | 3     | 6178073 | 6433245 | SJC_S000022 | 692438 | 937867 | +  | Sjp_0007150.1 | biological regulation         | 0.76396  |
| HSB10kb_80 | 3     | 6178073 | 6433245 | SJC_S000022 | 692438 | 937867 | +  | Sjp_0007160.1 | cell part                     | 0.009037 |
| HSB10kb_80 | 3     | 6178073 | 6433245 | SJC_S000022 | 692438 | 937867 | +  | Sjp_0007170.1 | cell part                     | 0.009037 |
| HSB10kb_80 | 3     | 6178073 | 6433245 | SJC_S000022 | 692438 | 937867 | +  | Sjp_0007180.1 | catalytic activity            | 0.035844 |
| HSB10kb_80 | 3     | 6178073 | 6433245 | SJC_S000022 | 692438 | 937867 | +  | Sjp_0007190.1 | NA                            | NA       |
| HSB10kb_80 | 3     | 6178073 | 6433245 | SJC_S000022 | 692438 | 937867 | +  | Sjp_0007200.1 | NA                            | NA       |
| HSB10kb_80 | 3     | 6178073 | 6433245 | SJC_S000022 | 692438 | 937867 | +  | Sjp_0007210.1 | biological regulation         | 0.76396  |
| HSB10kb_81 | 3     | 6081900 | 6175957 | SJC_S000022 | 765412 | 992504 | -  | Sjp_0007160.1 | cell part                     | 0.009037 |
| HSB10kb_81 | 3     | 6081900 | 6175957 | SJC_S000022 | 765412 | 992504 | -  | Sjp_0007170.1 | cell part                     | 0.009037 |
| HSB10kb_81 | 3     | 6081900 | 6175957 | SJC_S000022 | 765412 | 992504 | -  | Sjp_0007180.1 | catalytic activity            | 0.035844 |
| HSB10kb_81 | 3     | 6081900 | 6175957 | SJC_S000022 | 765412 | 992504 | -  | Sjp_0007190.1 | NA                            | NA       |
| HSB10kb_81 | 3     | 6081900 | 6175957 | SJC_S000022 | 765412 | 992504 | -  | Sjp_0007200.1 | NA                            | NA       |
| HSB10kb_81 | 3     | 6081900 | 6175957 | SJC_S000022 | 765412 | 992504 | -  | Sjp_0007210.1 | biological regulation         | 0.76396  |
| HSB10kb_81 | 3     | 6081900 | 6175957 | SJC_S000022 | 765412 | 992504 | -  | Sjp_0007220.1 | biological regulation         | 0.76396  |
| EBR10kb_60 | "3,3" | NA      | NA      | SJC_S000022 | 937868 | 765411 | NA | Sjp_0007210.1 | biological regulation         | 0.76396  |
| unknown    | NA    | NA      | NA      | SJC_S000023 | NA     | NA     | NA | Sjp_0007230.1 | NA                            | NA       |
| unknown    | NA    | NA      | NA      | SJC_S000023 | NA     | NA     | NA | Sjp_0007240.1 | NA                            | NA       |
| unknown    | NA    | NA      | NA      | SJC_S000023 | NA     | NA     | NA | Sjp_0007250.1 | cell part                     | 0.009037 |
| unknown    | NA    | NA      | NA      | SJC_S000023 | NA     | NA     | NA | Sjp_0007260.1 | cellular process              | 0.63852  |
| unknown    | NA    | NA      | NA      | SJC_S000023 | NA     | NA     | NA | Sjp_0007270.1 | cell part                     | 0.009037 |
| unknown    | NA    | NA      | NA      | SJC_S000023 | NA     | NA     | NA | Sjp_0007280.1 | NA                            | NA       |

|            |       |          |          |             |        |        |    |               |                               |          |
|------------|-------|----------|----------|-------------|--------|--------|----|---------------|-------------------------------|----------|
| unknown    | NA    | NA       | NA       | SJC_S000023 | NA     | NA     | NA | Sjp_0007290.1 | NA                            | NA       |
| unknown    | NA    | NA       | NA       | SJC_S000023 | NA     | NA     | NA | Sjp_0007310.1 | binding                       | 0.052762 |
| unknown    | NA    | NA       | NA       | SJC_S000023 | NA     | NA     | NA | Sjp_0007320.1 | catalytic activity            | 0.035844 |
| unknown    | NA    | NA       | NA       | SJC_S000023 | NA     | NA     | NA | Sjp_0007330.1 | binding                       | 0.052762 |
| unknown    | NA    | NA       | NA       | SJC_S000023 | NA     | NA     | NA | Sjp_0007340.1 | reproductive process          | NA       |
| unknown    | NA    | NA       | NA       | SJC_S000023 | NA     | NA     | NA | Sjp_0007360.1 | reproductive process          | NA       |
| unknown    | NA    | NA       | NA       | SJC_S000023 | NA     | NA     | NA | Sjp_0007370.1 | NA                            | NA       |
| unknown    | NA    | NA       | NA       | SJC_S000023 | NA     | NA     | NA | Sjp_0007380.1 | NA                            | NA       |
| unknown    | NA    | NA       | NA       | SJC_S000023 | NA     | NA     | NA | Sjp_0007390.1 | binding                       | 0.052762 |
| unknown    | NA    | NA       | NA       | SJC_S000023 | NA     | NA     | NA | Sjp_0007400.1 | NA                            | NA       |
| unknown    | NA    | NA       | NA       | SJC_S000023 | NA     | NA     | NA | Sjp_0007420.1 | binding                       | 0.052762 |
| unknown    | NA    | NA       | NA       | SJC_S000023 | NA     | NA     | NA | Sjp_0007430.1 | NA                            | NA       |
| unknown    | NA    | NA       | NA       | SJC_S000023 | NA     | NA     | NA | Sjp_0007440.1 | catalytic activity            | 0.035844 |
| HSB10kb_82 | 3     | 19130178 | 19148425 | SJC_S000024 | 3949   | 28361  | +  | Sjp_0007450.1 | NA                            | NA       |
| HSB10kb_82 | 3     | 19130178 | 19148425 | SJC_S000024 | 3949   | 28361  | +  | Sjp_0007460.1 | NA                            | NA       |
| EBR10kb_61 | "3,3" | NA       | NA       | SJC_S000024 | 28362  | 47283  | NA | Sjp_0007470.1 | molecular transducer activity | 0.50162  |
| HSB10kb_83 | 3     | 21429712 | 21543526 | SJC_S000024 | 47284  | 168017 | -  | Sjp_0007470.1 | molecular transducer activity | 0.50162  |
| HSB10kb_83 | 3     | 21429712 | 21543526 | SJC_S000024 | 47284  | 168017 | -  | Sjp_0007480.1 | cell part                     | 0.009037 |
| HSB10kb_83 | 3     | 21429712 | 21543526 | SJC_S000024 | 47284  | 168017 | -  | Sjp_0007490.1 | cell part                     | 0.009037 |
| EBR10kb_62 | "3,1" | NA       | NA       | SJC_S000024 | 168018 | 187560 | NA | Sjp_0007500.1 | NA                            | NA       |
| HSB10kb_84 | 1     | 417982   | 449927   | SJC_S000024 | 187561 | 210232 | -  | Sjp_0007500.1 | NA                            | NA       |
| EBR10kb_63 | "1,3" | NA       | NA       | SJC_S000024 | 210233 | 251721 | NA | Sjp_0007500.1 | NA                            | NA       |
| EBR10kb_63 | "1,3" | NA       | NA       | SJC_S000024 | 210233 | 251721 | NA | Sjp_0007510.1 | NA                            | NA       |
| EBR10kb_63 | "1,3" | NA       | NA       | SJC_S000024 | 210233 | 251721 | NA | Sjp_0007520.1 | cell part                     | 0.009037 |
| HSB10kb_85 | 3     | 21013084 | 21416209 | SJC_S000024 | 251722 | 691276 | -  | Sjp_0007530.1 | cell part                     | 0.009037 |
| HSB10kb_85 | 3     | 21013084 | 21416209 | SJC_S000024 | 251722 | 691276 | -  | Sjp_0007540.1 | transporter activity          | 0.782    |
| HSB10kb_85 | 3     | 21013084 | 21416209 | SJC_S000024 | 251722 | 691276 | -  | Sjp_0007550.1 | cellular                      | NA       |

|            |       |          |          |             |        |        |    |               |                                      |          |
|------------|-------|----------|----------|-------------|--------|--------|----|---------------|--------------------------------------|----------|
|            |       |          |          |             |        |        |    |               | component organization or biogenesis |          |
| HSB10kb_85 | 3     | 21013084 | 21416209 | SJC_S000024 | 251722 | 691276 | -  | Sjp_0007560.1 | NA                                   | NA       |
| HSB10kb_85 | 3     | 21013084 | 21416209 | SJC_S000024 | 251722 | 691276 | -  | Sjp_0007570.1 | NA                                   | NA       |
| HSB10kb_85 | 3     | 21013084 | 21416209 | SJC_S000024 | 251722 | 691276 | -  | Sjp_0007580.1 | cellular process                     | 0.63852  |
| HSB10kb_85 | 3     | 21013084 | 21416209 | SJC_S000024 | 251722 | 691276 | -  | Sjp_0007590.1 | response to stimulus                 | NA       |
| HSB10kb_85 | 3     | 21013084 | 21416209 | SJC_S000024 | 251722 | 691276 | -  | Sjp_0007600.1 | catalytic activity                   | 0.035844 |
| HSB10kb_85 | 3     | 21013084 | 21416209 | SJC_S000024 | 251722 | 691276 | -  | Sjp_0007610.1 | NA                                   | NA       |
| HSB10kb_85 | 3     | 21013084 | 21416209 | SJC_S000024 | 251722 | 691276 | -  | Sjp_0007620.1 | molecular transducer activity        | 0.50162  |
| HSB10kb_85 | 3     | 21013084 | 21416209 | SJC_S000024 | 251722 | 691276 | -  | Sjp_0007630.1 | establishment of localization        | NA       |
| HSB10kb_85 | 3     | 21013084 | 21416209 | SJC_S000024 | 251722 | 691276 | -  | Sjp_0007640.1 | binding                              | 0.052762 |
| HSB10kb_85 | 3     | 21013084 | 21416209 | SJC_S000024 | 251722 | 691276 | -  | Sjp_0007650.1 | cell part                            | 0.009037 |
| EBR10kb_64 | "3,3" | NA       | NA       | SJC_S000024 | 691277 | 704538 | NA | Sjp_0007650.1 | cell part                            | 0.009037 |
| EBR10kb_64 | "3,3" | NA       | NA       | SJC_S000024 | 691277 | 704538 | NA | Sjp_0007660.1 | binding                              | 0.052762 |
| HSB10kb_86 | 3     | 22573057 | 22676293 | SJC_S000024 | 704539 | 810972 | +  | Sjp_0007660.1 | binding                              | 0.052762 |
| HSB10kb_86 | 3     | 22573057 | 22676293 | SJC_S000024 | 704539 | 810972 | +  | Sjp_0007670.1 | NA                                   | NA       |
| HSB10kb_86 | 3     | 22573057 | 22676293 | SJC_S000024 | 704539 | 810972 | +  | Sjp_0007680.1 | NA                                   | NA       |
| HSB10kb_86 | 3     | 22573057 | 22676293 | SJC_S000024 | 704539 | 810972 | +  | Sjp_0007690.1 | NA                                   | NA       |
| HSB10kb_86 | 3     | 22573057 | 22676293 | SJC_S000024 | 704539 | 810972 | +  | Sjp_0007700.1 | NA                                   | NA       |
| HSB10kb_86 | 3     | 22573057 | 22676293 | SJC_S000024 | 704539 | 810972 | +  | Sjp_0007710.1 | NA                                   | NA       |
| EBR10kb_65 | "3,3" | NA       | NA       | SJC_S000024 | 810973 | 858393 | NA | Sjp_0007720.1 | transporter activity                 | 0.782    |
| EBR10kb_65 | "3,3" | NA       | NA       | SJC_S000024 | 810973 | 858393 | NA | Sjp_0007730.1 | molecular transducer activity        | 0.50162  |
| HSB10kb_87 | 3     | 22824294 | 22843392 | SJC_S000024 | 858394 | 884348 | +  | Sjp_0007730.1 | molecular transducer activity        | 0.50162  |
| HSB10kb_87 | 3     | 22824294 | 22843392 | SJC_S000024 | 858394 | 884348 | +  | Sjp_0007740.1 | NA                                   | NA       |
| unknown    | NA    | NA       | NA       | SJC_S000024 | NA     | NA     | NA | Sjp_0007750.1 | NA                                   | NA       |

|            |       |         |         |             |        |        |    |               |                       |          |
|------------|-------|---------|---------|-------------|--------|--------|----|---------------|-----------------------|----------|
| unknown    | NA    | NA      | NA      | SJC_S000025 | NA     | NA     | NA | Sjp_0007760.1 | NA                    | NA       |
| unknown    | NA    | NA      | NA      | SJC_S000025 | NA     | NA     | NA | Sjp_0007770.1 | immune system process | NA       |
| unknown    | NA    | NA      | NA      | SJC_S000025 | NA     | NA     | NA | Sjp_0007780.1 | catalytic activity    | 0.035844 |
| unknown    | NA    | NA      | NA      | SJC_S000025 | NA     | NA     | NA | Sjp_0007790.1 | transporter activity  | 0.782    |
| unknown    | NA    | NA      | NA      | SJC_S000025 | NA     | NA     | NA | Sjp_0007800.1 | cellular process      | 0.63852  |
| unknown    | NA    | NA      | NA      | SJC_S000025 | NA     | NA     | NA | Sjp_0007810.1 | NA                    | NA       |
| unknown    | NA    | NA      | NA      | SJC_S000025 | NA     | NA     | NA | Sjp_0007820.1 | NA                    | NA       |
| unknown    | NA    | NA      | NA      | SJC_S000025 | NA     | NA     | NA | Sjp_0007830.1 | NA                    | NA       |
| HSB10kb_88 | 4     | 10630   | 234059  | SJC_S000025 | 285343 | 488545 | +  | Sjp_0007840.1 | NA                    | NA       |
| HSB10kb_88 | 4     | 10630   | 234059  | SJC_S000025 | 285343 | 488545 | +  | Sjp_0007850.1 | NA                    | NA       |
| HSB10kb_88 | 4     | 10630   | 234059  | SJC_S000025 | 285343 | 488545 | +  | Sjp_0007860.1 | cell part             | 0.009037 |
| EBR10kb_66 | "4,4" | NA      | NA      | SJC_S000025 | 488546 | 512037 | NA | Sjp_0007880.1 | NA                    | NA       |
| HSB10kb_89 | 4     | 308582  | 342797  | SJC_S000025 | 512038 | 536815 | +  | Sjp_0007880.1 | NA                    | NA       |
| EBR10kb_67 | "4,4" | NA      | NA      | SJC_S000025 | 536816 | 547521 | NA | Sjp_0007890.1 | immune system process | NA       |
| HSB10kb_90 | 4     | 245163  | 290958  | SJC_S000025 | 547522 | 584749 | -  | Sjp_0007890.1 | immune system process | NA       |
| HSB10kb_90 | 4     | 245163  | 290958  | SJC_S000025 | 547522 | 584749 | -  | Sjp_0007900.1 | NA                    | NA       |
| EBR10kb_68 | "4,4" | NA      | NA      | SJC_S000025 | 584750 | 620705 | NA | Sjp_0007920.1 | binding               | 0.052762 |
| HSB10kb_91 | 4     | 355212  | 415123  | SJC_S000025 | 620706 | 682198 | +  | Sjp_0007920.1 | binding               | 0.052762 |
| HSB10kb_91 | 4     | 355212  | 415123  | SJC_S000025 | 620706 | 682198 | +  | Sjp_0007930.1 | NA                    | NA       |
| unknown    | NA    | NA      | NA      | SJC_S000025 | NA     | NA     | NA | Sjp_0007940.1 | NA                    | NA       |
| unknown    | NA    | NA      | NA      | SJC_S000025 | NA     | NA     | NA | Sjp_0007950.1 | NA                    | NA       |
| unknown    | NA    | NA      | NA      | SJC_S000025 | NA     | NA     | NA | Sjp_0007960.1 | NA                    | NA       |
| unknown    | NA    | NA      | NA      | SJC_S000026 | NA     | NA     | NA | Sjp_0007970.1 | metabolic process     | 0.41934  |
| unknown    | NA    | NA      | NA      | SJC_S000026 | NA     | NA     | NA | Sjp_0007980.1 | binding               | 0.052762 |
| HSB10kb_92 | 2     | 1961532 | 2166408 | SJC_S000026 | 53128  | 233905 | -  | Sjp_0007990.1 | NA                    | NA       |
| HSB10kb_92 | 2     | 1961532 | 2166408 | SJC_S000026 | 53128  | 233905 | -  | Sjp_0008000.1 | NA                    | NA       |
| HSB10kb_92 | 2     | 1961532 | 2166408 | SJC_S000026 | 53128  | 233905 | -  | Sjp_0008010.1 | NA                    | NA       |
| HSB10kb_92 | 2     | 1961532 | 2166408 | SJC_S000026 | 53128  | 233905 | -  | Sjp_0008020.1 | NA                    | NA       |
| HSB10kb_92 | 2     | 1961532 | 2166408 | SJC_S000026 | 53128  | 233905 | -  | Sjp_0008030.1 | catalytic activity    | 0.035844 |

|            |       |          |          |             |        |        |    |               |                       |          |
|------------|-------|----------|----------|-------------|--------|--------|----|---------------|-----------------------|----------|
| HSB10kb_92 | 2     | 1961532  | 2166408  | SJC_S000026 | 53128  | 233905 | -  | Sjp_0008040.1 | biological regulation | 0.76396  |
| HSB10kb_92 | 2     | 1961532  | 2166408  | SJC_S000026 | 53128  | 233905 | -  | Sjp_0008050.1 | NA                    | NA       |
| HSB10kb_92 | 2     | 1961532  | 2166408  | SJC_S000026 | 53128  | 233905 | -  | Sjp_0008060.1 | NA                    | NA       |
| HSB10kb_92 | 2     | 1961532  | 2166408  | SJC_S000026 | 53128  | 233905 | -  | Sjp_0008070.1 | NA                    | NA       |
| HSB10kb_92 | 2     | 1961532  | 2166408  | SJC_S000026 | 53128  | 233905 | -  | Sjp_0008080.1 | NA                    | NA       |
| HSB10kb_92 | 2     | 1961532  | 2166408  | SJC_S000026 | 53128  | 233905 | -  | Sjp_0008090.1 | binding               | 0.052762 |
| EBR10kb_69 | "2,2" | NA       | NA       | SJC_S000026 | 233906 | 461751 | NA | Sjp_0008100.1 | NA                    | NA       |
| EBR10kb_69 | "2,2" | NA       | NA       | SJC_S000026 | 233906 | 461751 | NA | Sjp_0008110.1 | NA                    | NA       |
| EBR10kb_69 | "2,2" | NA       | NA       | SJC_S000026 | 233906 | 461751 | NA | Sjp_0008120.1 | NA                    | NA       |
| EBR10kb_69 | "2,2" | NA       | NA       | SJC_S000026 | 233906 | 461751 | NA | Sjp_0008130.1 | NA                    | NA       |
| HSB10kb_93 | 2     | 1504729  | 1529853  | SJC_S000026 | 461752 | 492284 | -  | Sjp_0008130.1 | NA                    | NA       |
| HSB10kb_93 | 2     | 1504729  | 1529853  | SJC_S000026 | 461752 | 492284 | -  | Sjp_0008140.1 | catalytic activity    | 0.035844 |
| EBR10kb_70 | "2,2" | NA       | NA       | SJC_S000026 | 492285 | 525604 | NA | Sjp_0008150.1 | catalytic activity    | 0.035844 |
| EBR10kb_70 | "2,2" | NA       | NA       | SJC_S000026 | 492285 | 525604 | NA | Sjp_0008160.1 | catalytic activity    | 0.035844 |
| EBR10kb_70 | "2,2" | NA       | NA       | SJC_S000026 | 492285 | 525604 | NA | Sjp_0008170.1 | NA                    | NA       |
| HSB10kb_94 | 2     | 1311975  | 1420558  | SJC_S000026 | 525605 | 623781 | -  | Sjp_0008170.1 | NA                    | NA       |
| HSB10kb_94 | 2     | 1311975  | 1420558  | SJC_S000026 | 525605 | 623781 | -  | Sjp_0008180.1 | NA                    | NA       |
| HSB10kb_94 | 2     | 1311975  | 1420558  | SJC_S000026 | 525605 | 623781 | -  | Sjp_0008190.1 | binding               | 0.052762 |
| HSB10kb_94 | 2     | 1311975  | 1420558  | SJC_S000026 | 525605 | 623781 | -  | Sjp_0008200.1 | binding               | 0.052762 |
| EBR10kb_71 | "2,2" | NA       | NA       | SJC_S000026 | 623782 | 762536 | NA | Sjp_0008220.1 | NA                    | NA       |
| EBR10kb_71 | "2,2" | NA       | NA       | SJC_S000026 | 623782 | 762536 | NA | Sjp_0008230.1 | biological regulation | 0.76396  |
| EBR10kb_71 | "2,2" | NA       | NA       | SJC_S000026 | 623782 | 762536 | NA | Sjp_0008240.1 | NA                    | NA       |
| HSB10kb_95 | 2     | 1112315  | 1191508  | SJC_S000026 | 762537 | 863830 | +  | Sjp_0008240.1 | NA                    | NA       |
| HSB10kb_95 | 2     | 1112315  | 1191508  | SJC_S000026 | 762537 | 863830 | +  | Sjp_0008250.1 | catalytic activity    | 0.035844 |
| HSB10kb_95 | 2     | 1112315  | 1191508  | SJC_S000026 | 762537 | 863830 | +  | Sjp_0008260.1 | NA                    | NA       |
| HSB10kb_95 | 2     | 1112315  | 1191508  | SJC_S000026 | 762537 | 863830 | +  | Sjp_0008270.1 | NA                    | NA       |
| HSB10kb_95 | 2     | 1112315  | 1191508  | SJC_S000026 | 762537 | 863830 | +  | Sjp_0008280.1 | NA                    | NA       |
| HSB10kb_95 | 2     | 1112315  | 1191508  | SJC_S000026 | 762537 | 863830 | +  | Sjp_0008290.1 | NA                    | NA       |
| unknown    | NA    | NA       | NA       | SJC_S000027 | NA     | NA     | NA | Sjp_0008300.1 | NA                    | NA       |
| unknown    | NA    | NA       | NA       | SJC_S000027 | NA     | NA     | NA | Sjp_0008310.1 | NA                    | NA       |
| HSB10kb_96 | 4     | 17117461 | 17141365 | SJC_S000027 | 137206 | 180918 | +  | Sjp_0008320.1 | NA                    | NA       |
| EBR10kb_72 | "4,1" | NA       | NA       | SJC_S000027 | 180919 | 252075 | NA | Sjp_0008330.1 | NA                    | NA       |

|             |       |          |          |             |        |        |    |               |                                               |          |
|-------------|-------|----------|----------|-------------|--------|--------|----|---------------|-----------------------------------------------|----------|
| EBR10kb_72  | "4,1" | NA       | NA       | SJC_S000027 | 180919 | 252075 | NA | Sjp_0008340.1 | NA                                            | NA       |
| HSB10kb_97  | 1     | 57583834 | 57969740 | SJC_S000027 | 252076 | 573740 | +  | Sjp_0008350.1 | NA                                            | NA       |
| HSB10kb_97  | 1     | 57583834 | 57969740 | SJC_S000027 | 252076 | 573740 | +  | Sjp_0008360.1 | cell part                                     | 0.009037 |
| HSB10kb_97  | 1     | 57583834 | 57969740 | SJC_S000027 | 252076 | 573740 | +  | Sjp_0008370.1 | binding                                       | 0.052762 |
| HSB10kb_97  | 1     | 57583834 | 57969740 | SJC_S000027 | 252076 | 573740 | +  | Sjp_0008380.1 | NA                                            | NA       |
| HSB10kb_97  | 1     | 57583834 | 57969740 | SJC_S000027 | 252076 | 573740 | +  | Sjp_0008390.1 | biological regulation                         | 0.76396  |
| HSB10kb_97  | 1     | 57583834 | 57969740 | SJC_S000027 | 252076 | 573740 | +  | Sjp_0008400.1 | response to stimulus                          | NA       |
| HSB10kb_97  | 1     | 57583834 | 57969740 | SJC_S000027 | 252076 | 573740 | +  | Sjp_0008410.1 | cellular process                              | 0.63852  |
| HSB10kb_97  | 1     | 57583834 | 57969740 | SJC_S000027 | 252076 | 573740 | +  | Sjp_0008420.1 | NA                                            | NA       |
| HSB10kb_97  | 1     | 57583834 | 57969740 | SJC_S000027 | 252076 | 573740 | +  | Sjp_0008430.1 | NA                                            | NA       |
| HSB10kb_97  | 1     | 57583834 | 57969740 | SJC_S000027 | 252076 | 573740 | +  | Sjp_0008440.1 | NA                                            | NA       |
| EBR10kb_73  | "1,1" | NA       | NA       | SJC_S000027 | 573741 | 600244 | NA | Sjp_0008440.1 | NA                                            | NA       |
| HSB10kb_98  | 1     | 57476976 | 57555790 | SJC_S000027 | 600245 | 672480 | +  | Sjp_0008450.1 | catalytic activity                            | 0.035844 |
| HSB10kb_99  | 5     | 8537954  | 8584644  | SJC_S000028 | 12647  | 54333  | +  | Sjp_0008460.1 | catalytic activity                            | 0.035844 |
| HSB10kb_99  | 5     | 8537954  | 8584644  | SJC_S000028 | 12647  | 54333  | +  | Sjp_0008470.1 | NA                                            | NA       |
| EBR10kb_74  | "5,5" | NA       | NA       | SJC_S000028 | 54334  | 123602 | NA | Sjp_0008470.1 | NA                                            | NA       |
| EBR10kb_74  | "5,5" | NA       | NA       | SJC_S000028 | 54334  | 123602 | NA | Sjp_0008480.1 | NA                                            | NA       |
| EBR10kb_74  | "5,5" | NA       | NA       | SJC_S000028 | 54334  | 123602 | NA | Sjp_0008490.1 | NA                                            | NA       |
| EBR10kb_74  | "5,5" | NA       | NA       | SJC_S000028 | 54334  | 123602 | NA | Sjp_0008500.1 | NA                                            | NA       |
| HSB10kb_100 | 5     | 6441439  | 6661389  | SJC_S000028 | 123603 | 357972 | +  | Sjp_0008500.1 | NA                                            | NA       |
| HSB10kb_100 | 5     | 6441439  | 6661389  | SJC_S000028 | 123603 | 357972 | +  | Sjp_0008510.1 | NA                                            | NA       |
| HSB10kb_100 | 5     | 6441439  | 6661389  | SJC_S000028 | 123603 | 357972 | +  | Sjp_0008520.1 | protein binding transcription factor activity | NA       |
| HSB10kb_100 | 5     | 6441439  | 6661389  | SJC_S000028 | 123603 | 357972 | +  | Sjp_0008530.1 | NA                                            | NA       |
| HSB10kb_100 | 5     | 6441439  | 6661389  | SJC_S000028 | 123603 | 357972 | +  | Sjp_0008540.1 | NA                                            | NA       |
| unknown     | NA    | NA       | NA       | SJC_S000028 | NA     | NA     | NA | Sjp_0008550.1 | NA                                            | NA       |
| unknown     | NA    | NA       | NA       | SJC_S000028 | NA     | NA     | NA | Sjp_0008560.1 | biological regulation                         | 0.76396  |
| unknown     | NA    | NA       | NA       | SJC_S000028 | NA     | NA     | NA | Sjp_0008570.1 | NA                                            | NA       |
| unknown     | NA    | NA       | NA       | SJC_S000028 | NA     | NA     | NA | Sjp_0008580.1 | cell part                                     | 0.009037 |
| unknown     | NA    | NA       | NA       | SJC_S000029 | NA     | NA     | NA | Sjp_0008600.1 | binding                                       | 0.052762 |



|             |       |          |          |             |        |        |    |               |                           |          |
|-------------|-------|----------|----------|-------------|--------|--------|----|---------------|---------------------------|----------|
| unknown     | NA    | NA       | NA       | SJC_S000029 | NA     | NA     | NA | Sjp_0008610.1 | cell part                 | 0.009037 |
| unknown     | NA    | NA       | NA       | SJC_S000029 | NA     | NA     | NA | Sjp_0008620.1 | cell part                 | 0.009037 |
| unknown     | NA    | NA       | NA       | SJC_S000029 | NA     | NA     | NA | Sjp_0008630.1 | binding                   | 0.052762 |
| unknown     | NA    | NA       | NA       | SJC_S000029 | NA     | NA     | NA | Sjp_0008640.1 | NA                        | NA       |
| unknown     | NA    | NA       | NA       | SJC_S000029 | NA     | NA     | NA | Sjp_0008650.1 | catalytic activity        | 0.035844 |
| unknown     | NA    | NA       | NA       | SJC_S000029 | NA     | NA     | NA | Sjp_0008660.1 | NA                        | NA       |
| unknown     | NA    | NA       | NA       | SJC_S000029 | NA     | NA     | NA | Sjp_0008670.1 | binding                   | 0.052762 |
| unknown     | NA    | NA       | NA       | SJC_S000029 | NA     | NA     | NA | Sjp_0008680.1 | NA                        | NA       |
| unknown     | NA    | NA       | NA       | SJC_S000029 | NA     | NA     | NA | Sjp_0008690.1 | NA                        | NA       |
| unknown     | NA    | NA       | NA       | SJC_S000029 | NA     | NA     | NA | Sjp_0008700.1 | catalytic activity        | 0.035844 |
| unknown     | NA    | NA       | NA       | SJC_S000029 | NA     | NA     | NA | Sjp_0008710.1 | NA                        | NA       |
| unknown     | NA    | NA       | NA       | SJC_S000029 | NA     | NA     | NA | Sjp_0008720.1 | catalytic activity        | 0.035844 |
| unknown     | NA    | NA       | NA       | SJC_S000029 | NA     | NA     | NA | Sjp_0008730.1 | catalytic activity        | 0.035844 |
| unknown     | NA    | NA       | NA       | SJC_S000029 | NA     | NA     | NA | Sjp_0008740.1 | NA                        | NA       |
| unknown     | NA    | NA       | NA       | SJC_S000029 | NA     | NA     | NA | Sjp_0008760.1 | NA                        | NA       |
| unknown     | NA    | NA       | NA       | SJC_S000029 | NA     | NA     | NA | Sjp_0008770.1 | NA                        | NA       |
| unknown     | NA    | NA       | NA       | SJC_S000029 | NA     | NA     | NA | Sjp_0008780.1 | NA                        | NA       |
| unknown     | NA    | NA       | NA       | SJC_S000029 | NA     | NA     | NA | Sjp_0008790.1 | enzyme regulator activity | 0.1755   |
| unknown     | NA    | NA       | NA       | SJC_S000029 | NA     | NA     | NA | Sjp_0008800.1 | NA                        | NA       |
| HSB10kb_101 | 6     | 4761957  | 4859074  | SJC_S000030 | 1      | 134559 | +  | Sjp_0008810.1 | NA                        | NA       |
| HSB10kb_101 | 6     | 4761957  | 4859074  | SJC_S000030 | 1      | 134559 | +  | Sjp_0008820.1 | NA                        | NA       |
| EBR10kb_75  | "6,6" | NA       | NA       | SJC_S000030 | 134560 | 403641 | NA | Sjp_0008820.1 | NA                        | NA       |
| EBR10kb_75  | "6,6" | NA       | NA       | SJC_S000030 | 134560 | 403641 | NA | Sjp_0008830.1 | binding                   | 0.052762 |
| EBR10kb_75  | "6,6" | NA       | NA       | SJC_S000030 | 134560 | 403641 | NA | Sjp_0008840.1 | NA                        | NA       |
| EBR10kb_75  | "6,6" | NA       | NA       | SJC_S000030 | 134560 | 403641 | NA | Sjp_0008850.1 | NA                        | NA       |
| EBR10kb_75  | "6,6" | NA       | NA       | SJC_S000030 | 134560 | 403641 | NA | Sjp_0008860.1 | binding                   | 0.052762 |
| EBR10kb_75  | "6,6" | NA       | NA       | SJC_S000030 | 134560 | 403641 | NA | Sjp_0008870.1 | NA                        | NA       |
| HSB10kb_102 | 6     | 12275567 | 12527940 | SJC_S000030 | 403642 | 647897 | -  | Sjp_0008870.1 | NA                        | NA       |
| HSB10kb_102 | 6     | 12275567 | 12527940 | SJC_S000030 | 403642 | 647897 | -  | Sjp_0008880.1 | enzyme regulator activity | 0.1755   |
| HSB10kb_102 | 6     | 12275567 | 12527940 | SJC_S000030 | 403642 | 647897 | -  | Sjp_0008890.1 | NA                        | NA       |

|             |       |          |          |             |        |        |    |               |                       |          |
|-------------|-------|----------|----------|-------------|--------|--------|----|---------------|-----------------------|----------|
| HSB10kb_102 | 6     | 12275567 | 12527940 | SJC_S000030 | 403642 | 647897 | -  | Sjp_0008900.1 | NA                    | NA       |
| HSB10kb_102 | 6     | 12275567 | 12527940 | SJC_S000030 | 403642 | 647897 | -  | Sjp_0008910.1 | NA                    | NA       |
| HSB10kb_102 | 6     | 12275567 | 12527940 | SJC_S000030 | 403642 | 647897 | -  | Sjp_0008920.1 | NA                    | NA       |
| HSB10kb_102 | 6     | 12275567 | 12527940 | SJC_S000030 | 403642 | 647897 | -  | Sjp_0008930.1 | NA                    | NA       |
| HSB10kb_102 | 6     | 12275567 | 12527940 | SJC_S000030 | 403642 | 647897 | -  | Sjp_0008940.1 | metabolic process     | 0.41934  |
| HSB10kb_102 | 6     | 12275567 | 12527940 | SJC_S000030 | 403642 | 647897 | -  | Sjp_0008950.1 | NA                    | NA       |
| EBR10kb_76  | "6,6" | NA       | NA       | SJC_S000030 | 647898 | 748449 | NA | Sjp_0008960.1 | NA                    | NA       |
| EBR10kb_76  | "6,6" | NA       | NA       | SJC_S000030 | 647898 | 748449 | NA | Sjp_0008970.1 | NA                    | NA       |
| EBR10kb_76  | "6,6" | NA       | NA       | SJC_S000030 | 647898 | 748449 | NA | Sjp_0008980.1 | NA                    | NA       |
| EBR10kb_76  | "6,6" | NA       | NA       | SJC_S000030 | 647898 | 748449 | NA | Sjp_0008990.1 | NA                    | NA       |
| HSB10kb_103 | 6     | 12233931 | 12261709 | SJC_S000030 | 748450 | 777487 | +  | Sjp_0009000.1 | NA                    | NA       |
| HSB10kb_103 | 6     | 12233931 | 12261709 | SJC_S000030 | 748450 | 777487 | +  | Sjp_0009010.1 | NA                    | NA       |
| EBR10kb_77  | "6,6" | NA       | NA       | SJC_S000030 | 777488 | 844577 | NA | Sjp_0009020.1 | NA                    | NA       |
| HSB10kb_104 | 6     | 12008533 | 12129067 | SJC_S000030 | 844578 | 914338 | -  | Sjp_0009030.1 | NA                    | NA       |
| HSB10kb_104 | 6     | 12008533 | 12129067 | SJC_S000030 | 844578 | 914338 | -  | Sjp_0009040.1 | NA                    | NA       |
| unknown     | NA    | NA       | NA       | SJC_S000030 | NA     | NA     | NA | Sjp_0009050.1 | NA                    | NA       |
| unknown     | NA    | NA       | NA       | SJC_S000031 | NA     | NA     | NA | Sjp_0009060.1 | NA                    | NA       |
| HSB10kb_105 | WZ    | 4651627  | 4868619  | SJC_S000031 | 74183  | 287631 | +  | Sjp_0009070.1 | NA                    | NA       |
| HSB10kb_105 | WZ    | 4651627  | 4868619  | SJC_S000031 | 74183  | 287631 | +  | Sjp_0009080.1 | NA                    | NA       |
| HSB10kb_105 | WZ    | 4651627  | 4868619  | SJC_S000031 | 74183  | 287631 | +  | Sjp_0009090.1 | catalytic activity    | 0.035844 |
| HSB10kb_105 | WZ    | 4651627  | 4868619  | SJC_S000031 | 74183  | 287631 | +  | Sjp_0009120.1 | NA                    | NA       |
| unknown     | NA    | NA       | NA       | SJC_S000031 | NA     | NA     | NA | Sjp_0009130.1 | NA                    | NA       |
| unknown     | NA    | NA       | NA       | SJC_S000031 | NA     | NA     | NA | Sjp_0009140.1 | NA                    | NA       |
| unknown     | NA    | NA       | NA       | SJC_S000031 | NA     | NA     | NA | Sjp_0009150.1 | NA                    | NA       |
| unknown     | NA    | NA       | NA       | SJC_S000031 | NA     | NA     | NA | Sjp_0009160.1 | cell part             | 0.009037 |
| unknown     | NA    | NA       | NA       | SJC_S000031 | NA     | NA     | NA | Sjp_0009170.1 | binding               | 0.052762 |
| unknown     | NA    | NA       | NA       | SJC_S000031 | NA     | NA     | NA | Sjp_0009180.1 | catalytic activity    | 0.035844 |
| unknown     | NA    | NA       | NA       | SJC_S000031 | NA     | NA     | NA | Sjp_0009190.1 | biological regulation | 0.76396  |
| unknown     | NA    | NA       | NA       | SJC_S000031 | NA     | NA     | NA | Sjp_0009200.1 | cellular process      | 0.63852  |
| unknown     | NA    | NA       | NA       | SJC_S000031 | NA     | NA     | NA | Sjp_0009210.1 | NA                    | NA       |
| unknown     | NA    | NA       | NA       | SJC_S000031 | NA     | NA     | NA | Sjp_0009220.1 | NA                    | NA       |
| unknown     | NA    | NA       | NA       | SJC_S000031 | NA     | NA     | NA | Sjp_0009240.1 | NA                    | NA       |

|             |    |         |         |             |       |        |    |               |                       |          |
|-------------|----|---------|---------|-------------|-------|--------|----|---------------|-----------------------|----------|
| unknown     | NA | NA      | NA      | SJC_S000031 | NA    | NA     | NA | Sjp_0009250.1 | binding               | 0.052762 |
| unknown     | NA | NA      | NA      | SJC_S000031 | NA    | NA     | NA | Sjp_0009260.1 | catalytic activity    | 0.035844 |
| unknown     | NA | NA      | NA      | SJC_S000031 | NA    | NA     | NA | Sjp_0009270.1 | NA                    | NA       |
| unknown     | NA | NA      | NA      | SJC_S000031 | NA    | NA     | NA | Sjp_0009280.1 | NA                    | NA       |
| unknown     | NA | NA      | NA      | SJC_S000031 | NA    | NA     | NA | Sjp_0009290.1 | NA                    | NA       |
| unknown     | NA | NA      | NA      | SJC_S000031 | NA    | NA     | NA | Sjp_0009300.1 | cell part             | 0.009037 |
| unknown     | NA | NA      | NA      | SJC_S000031 | NA    | NA     | NA | Sjp_0009310.1 | binding               | 0.052762 |
| unknown     | NA | NA      | NA      | SJC_S000031 | NA    | NA     | NA | Sjp_0009320.1 | NA                    | NA       |
| unknown     | NA | NA      | NA      | SJC_S000031 | NA    | NA     | NA | Sjp_0009330.1 | NA                    | NA       |
| unknown     | NA | NA      | NA      | SJC_S000031 | NA    | NA     | NA | Sjp_0009340.1 | NA                    | NA       |
| unknown     | NA | NA      | NA      | SJC_S000031 | NA    | NA     | NA | Sjp_0009350.1 | NA                    | NA       |
| unknown     | NA | NA      | NA      | SJC_S000031 | NA    | NA     | NA | Sjp_0009360.1 | catalytic activity    | 0.035844 |
| unknown     | NA | NA      | NA      | SJC_S000031 | NA    | NA     | NA | Sjp_0009370.1 | NA                    | NA       |
| unknown     | NA | NA      | NA      | SJC_S000031 | NA    | NA     | NA | Sjp_0009380.1 | cell part             | 0.009037 |
| unknown     | NA | NA      | NA      | SJC_S000031 | NA    | NA     | NA | Sjp_0009390.1 | NA                    | NA       |
| unknown     | NA | NA      | NA      | SJC_S000031 | NA    | NA     | NA | Sjp_0009410.1 | NA                    | NA       |
| unknown     | NA | NA      | NA      | SJC_S000031 | NA    | NA     | NA | Sjp_0009420.1 | NA                    | NA       |
| unknown     | NA | NA      | NA      | SJC_S000032 | NA    | NA     | NA | Sjp_0009430.1 | NA                    | NA       |
| unknown     | NA | NA      | NA      | SJC_S000032 | NA    | NA     | NA | Sjp_0009440.1 | catalytic activity    | 0.035844 |
| unknown     | NA | NA      | NA      | SJC_S000032 | NA    | NA     | NA | Sjp_0009450.1 | NA                    | NA       |
| unknown     | NA | NA      | NA      | SJC_S000032 | NA    | NA     | NA | Sjp_0009460.1 | catalytic activity    | 0.035844 |
| unknown     | NA | NA      | NA      | SJC_S000032 | NA    | NA     | NA | Sjp_0009470.1 | biological regulation | 0.76396  |
| unknown     | NA | NA      | NA      | SJC_S000032 | NA    | NA     | NA | Sjp_0009480.1 | catalytic activity    | 0.035844 |
| unknown     | NA | NA      | NA      | SJC_S000032 | NA    | NA     | NA | Sjp_0009490.1 | NA                    | NA       |
| unknown     | NA | NA      | NA      | SJC_S000032 | NA    | NA     | NA | Sjp_0009500.1 | binding               | 0.052762 |
| unknown     | NA | NA      | NA      | SJC_S000032 | NA    | NA     | NA | Sjp_0009510.1 | NA                    | NA       |
| unknown     | NA | NA      | NA      | SJC_S000032 | NA    | NA     | NA | Sjp_0009520.1 | NA                    | NA       |
| unknown     | NA | NA      | NA      | SJC_S000032 | NA    | NA     | NA | Sjp_0009530.1 | NA                    | NA       |
| unknown     | NA | NA      | NA      | SJC_S000032 | NA    | NA     | NA | Sjp_0009540.1 | NA                    | NA       |
| unknown     | NA | NA      | NA      | SJC_S000032 | NA    | NA     | NA | Sjp_0009550.1 | NA                    | NA       |
| HSB10kb_106 | 4  | 6775494 | 7056376 | SJC_S000033 | 23332 | 271864 | +  | Sjp_0009570.1 | NA                    | NA       |
| HSB10kb_106 | 4  | 6775494 | 7056376 | SJC_S000033 | 23332 | 271864 | +  | Sjp_0009580.1 | NA                    | NA       |
| HSB10kb_106 | 4  | 6775494 | 7056376 | SJC_S000033 | 23332 | 271864 | +  | Sjp_0009590.1 | NA                    | NA       |

|             |       |          |          |             |        |        |    |               |                    |          |
|-------------|-------|----------|----------|-------------|--------|--------|----|---------------|--------------------|----------|
| HSB10kb_106 | 4     | 6775494  | 7056376  | SJC_S000033 | 23332  | 271864 | +  | Sjp_0009600.1 | catalytic activity | 0.035844 |
| HSB10kb_106 | 4     | 6775494  | 7056376  | SJC_S000033 | 23332  | 271864 | +  | Sjp_0009610.1 | metabolic process  | 0.41934  |
| HSB10kb_106 | 4     | 6775494  | 7056376  | SJC_S000033 | 23332  | 271864 | +  | Sjp_0009620.1 | NA                 | NA       |
| HSB10kb_106 | 4     | 6775494  | 7056376  | SJC_S000033 | 23332  | 271864 | +  | Sjp_0009630.1 | cell part          | 0.009037 |
| unknown     | NA    | NA       | NA       | SJC_S000033 | NA     | NA     | NA | Sjp_0009640.1 | metabolic process  | 0.41934  |
| unknown     | NA    | NA       | NA       | SJC_S000033 | NA     | NA     | NA | Sjp_0009660.1 | NA                 | NA       |
| unknown     | NA    | NA       | NA       | SJC_S000033 | NA     | NA     | NA | Sjp_0009670.1 | NA                 | NA       |
| unknown     | NA    | NA       | NA       | SJC_S000033 | NA     | NA     | NA | Sjp_0009680.1 | binding            | 0.052762 |
| unknown     | NA    | NA       | NA       | SJC_S000033 | NA     | NA     | NA | Sjp_0009690.1 | NA                 | NA       |
| unknown     | NA    | NA       | NA       | SJC_S000033 | NA     | NA     | NA | Sjp_0009700.1 | NA                 | NA       |
| unknown     | NA    | NA       | NA       | SJC_S000033 | NA     | NA     | NA | Sjp_0009710.1 | NA                 | NA       |
| unknown     | NA    | NA       | NA       | SJC_S000033 | NA     | NA     | NA | Sjp_0009720.1 | NA                 | NA       |
| unknown     | NA    | NA       | NA       | SJC_S000033 | NA     | NA     | NA | Sjp_0009730.1 | cell part          | 0.009037 |
| unknown     | NA    | NA       | NA       | SJC_S000033 | NA     | NA     | NA | Sjp_0009740.1 | NA                 | NA       |
| unknown     | NA    | NA       | NA       | SJC_S000033 | NA     | NA     | NA | Sjp_0009750.1 | NA                 | NA       |
| unknown     | NA    | NA       | NA       | SJC_S000033 | NA     | NA     | NA | Sjp_0009760.1 | NA                 | NA       |
| unknown     | NA    | NA       | NA       | SJC_S000033 | NA     | NA     | NA | Sjp_0009780.1 | NA                 | NA       |
| unknown     | NA    | NA       | NA       | SJC_S000034 | NA     | NA     | NA | Sjp_0009790.1 | NA                 | NA       |
| unknown     | NA    | NA       | NA       | SJC_S000034 | NA     | NA     | NA | Sjp_0009800.1 | NA                 | NA       |
| HSB10kb_107 | 1     | 12444727 | 12538446 | SJC_S000034 | 77432  | 153569 | -  | Sjp_0009810.1 | NA                 | NA       |
| HSB10kb_107 | 1     | 12444727 | 12538446 | SJC_S000034 | 77432  | 153569 | -  | Sjp_0009820.1 | NA                 | NA       |
| EBR10kb_78  | "1,2" | NA       | NA       | SJC_S000034 | 153570 | 283043 | NA | Sjp_0009830.1 | NA                 | NA       |
| EBR10kb_78  | "1,2" | NA       | NA       | SJC_S000034 | 153570 | 283043 | NA | Sjp_0009840.1 | NA                 | NA       |
| HSB10kb_108 | 2     | 27236448 | 27250176 | SJC_S000034 | 283044 | 302981 | -  | NA            | NA                 | NA       |
| EBR10kb_79  | "2,2" | NA       | NA       | SJC_S000034 | 302982 | 320366 | NA | NA            | NA                 | NA       |
| HSB10kb_109 | 2     | 27129572 | 27173475 | SJC_S000034 | 320367 | 360975 | -  | Sjp_0009860.1 | NA                 | NA       |
| HSB10kb_109 | 2     | 27129572 | 27173475 | SJC_S000034 | 320367 | 360975 | -  | Sjp_0009870.1 | NA                 | NA       |
| EBR10kb_80  | "2,2" | NA       | NA       | SJC_S000034 | 360976 | 384287 | NA | Sjp_0009870.1 | NA                 | NA       |
| EBR10kb_80  | "2,2" | NA       | NA       | SJC_S000034 | 360976 | 384287 | NA | Sjp_0009880.1 | NA                 | NA       |
| HSB10kb_110 | 2     | 27308811 | 27495155 | SJC_S000034 | 384288 | 514816 | +  | Sjp_0009880.1 | NA                 | NA       |
| HSB10kb_110 | 2     | 27308811 | 27495155 | SJC_S000034 | 384288 | 514816 | +  | Sjp_0009890.1 | NA                 | NA       |
| HSB10kb_110 | 2     | 27308811 | 27495155 | SJC_S000034 | 384288 | 514816 | +  | Sjp_0009900.1 | catalytic activity | 0.035844 |

|             |         |          |          |             |        |        |    |               |                                               |          |
|-------------|---------|----------|----------|-------------|--------|--------|----|---------------|-----------------------------------------------|----------|
| HSB10kb_110 | 2       | 27308811 | 27495155 | SJC_S000034 | 384288 | 514816 | +  | Sjp_0009910.1 | NA                                            | NA       |
| HSB10kb_110 | 2       | 27308811 | 27495155 | SJC_S000034 | 384288 | 514816 | +  | Sjp_0009920.1 | NA                                            | NA       |
| HSB10kb_110 | 2       | 27308811 | 27495155 | SJC_S000034 | 384288 | 514816 | +  | Sjp_0009930.1 | catalytic activity                            | 0.035844 |
| HSB10kb_110 | 2       | 27308811 | 27495155 | SJC_S000034 | 384288 | 514816 | +  | Sjp_0009940.1 | catalytic activity                            | 0.035844 |
| HSB10kb_110 | 2       | 27308811 | 27495155 | SJC_S000034 | 384288 | 514816 | +  | Sjp_0009950.1 | NA                                            | NA       |
| unknown     | NA      | NA       | NA       | SJC_S000034 | NA     | NA     | NA | Sjp_0009960.1 | NA                                            | NA       |
| unknown     | NA      | NA       | NA       | SJC_S000035 | NA     | NA     | NA | Sjp_0009970.1 | enzyme regulator activity                     | 0.1755   |
| unknown     | NA      | NA       | NA       | SJC_S000035 | NA     | NA     | NA | Sjp_0009980.1 | metabolic process                             | 0.41934  |
| HSB10kb_111 | 1       | 46199818 | 46251559 | SJC_S000035 | 114213 | 171609 | -  | Sjp_0009990.1 | NA                                            | NA       |
| HSB10kb_111 | 1       | 46199818 | 46251559 | SJC_S000035 | 114213 | 171609 | -  | Sjp_0010010.1 | NA                                            | NA       |
| HSB10kb_111 | 1       | 46199818 | 46251559 | SJC_S000035 | 114213 | 171609 | -  | Sjp_0010020.1 | NA                                            | NA       |
| EBR10kb_81  | "1,WZ"  | NA       | NA       | SJC_S000035 | 171610 | 210183 | NA | Sjp_0010030.1 | NA                                            | NA       |
| EBR10kb_81  | "1,WZ"  | NA       | NA       | SJC_S000035 | 171610 | 210183 | NA | Sjp_0010040.1 | cellular process                              | 0.63852  |
| HSB10kb_112 | WZ      | 31414541 | 31449088 | SJC_S000035 | 210184 | 233205 | +  | Sjp_0010040.1 | cellular process                              | 0.63852  |
| EBR10kb_82  | "WZ,WZ" | NA       | NA       | SJC_S000035 | 233206 | 242748 | NA | NA            | NA                                            | NA       |
| HSB10kb_113 | WZ      | 31260673 | 31275704 | SJC_S000035 | 242749 | 260304 |    | NA            | NA                                            | NA       |
| unknown     | NA      | NA       | NA       | SJC_S000035 | NA     | NA     | NA | Sjp_0010060.1 | cell part                                     | 0.009037 |
| unknown     | NA      | NA       | NA       | SJC_S000036 | NA     | NA     | NA | Sjp_0010070.1 | NA                                            | NA       |
| unknown     | NA      | NA       | NA       | SJC_S000036 | NA     | NA     | NA | Sjp_0010080.1 | transporter activity                          | 0.782    |
| unknown     | NA      | NA       | NA       | SJC_S000036 | NA     | NA     | NA | Sjp_0010090.1 | transporter activity                          | 0.782    |
| unknown     | NA      | NA       | NA       | SJC_S000036 | NA     | NA     | NA | Sjp_0010100.1 | NA                                            | NA       |
| unknown     | NA      | NA       | NA       | SJC_S000036 | NA     | NA     | NA | Sjp_0010110.1 | cellular component organization or biogenesis | NA       |
| unknown     | NA      | NA       | NA       | SJC_S000036 | NA     | NA     | NA | Sjp_0010120.1 | transporter activity                          | 0.782    |
| unknown     | NA      | NA       | NA       | SJC_S000036 | NA     | NA     | NA | Sjp_0010130.1 | NA                                            | NA       |
| unknown     | NA      | NA       | NA       | SJC_S000036 | NA     | NA     | NA | Sjp_0010140.1 | NA                                            | NA       |

|             |       |          |          |             |        |        |    |               |                            |          |
|-------------|-------|----------|----------|-------------|--------|--------|----|---------------|----------------------------|----------|
| unknown     | NA    | NA       | NA       | SJC_S000036 | NA     | NA     | NA | Sjp_0010150.1 | NA                         | NA       |
| unknown     | NA    | NA       | NA       | SJC_S000036 | NA     | NA     | NA | Sjp_0010160.1 | cellular process           | 0.63852  |
| unknown     | NA    | NA       | NA       | SJC_S000036 | NA     | NA     | NA | Sjp_0010170.1 | binding                    | 0.052762 |
| unknown     | NA    | NA       | NA       | SJC_S000036 | NA     | NA     | NA | Sjp_0010190.1 | NA                         | NA       |
| unknown     | NA    | NA       | NA       | SJC_S000036 | NA     | NA     | NA | Sjp_0010200.1 | NA                         | NA       |
| unknown     | NA    | NA       | NA       | SJC_S000036 | NA     | NA     | NA | Sjp_0010210.1 | binding                    | 0.052762 |
| HSB10kb_114 | 1     | 47239618 | 47862347 | SJC_S000037 | 2675   | 679685 | +  | Sjp_0010220.1 | NA                         | NA       |
| HSB10kb_114 | 1     | 47239618 | 47862347 | SJC_S000037 | 2675   | 679685 | +  | Sjp_0010230.1 | NA                         | NA       |
| HSB10kb_114 | 1     | 47239618 | 47862347 | SJC_S000037 | 2675   | 679685 | +  | Sjp_0010240.1 | cellular process           | 0.63852  |
| HSB10kb_114 | 1     | 47239618 | 47862347 | SJC_S000037 | 2675   | 679685 | +  | Sjp_0010250.1 | cell part                  | 0.009037 |
| HSB10kb_114 | 1     | 47239618 | 47862347 | SJC_S000037 | 2675   | 679685 | +  | Sjp_0010260.1 | NA                         | NA       |
| HSB10kb_114 | 1     | 47239618 | 47862347 | SJC_S000037 | 2675   | 679685 | +  | Sjp_0010270.1 | transporter activity       | 0.782    |
| HSB10kb_114 | 1     | 47239618 | 47862347 | SJC_S000037 | 2675   | 679685 | +  | Sjp_0010280.1 | catalytic activity         | 0.035844 |
| HSB10kb_114 | 1     | 47239618 | 47862347 | SJC_S000037 | 2675   | 679685 | +  | Sjp_0010290.1 | catalytic activity         | 0.035844 |
| HSB10kb_114 | 1     | 47239618 | 47862347 | SJC_S000037 | 2675   | 679685 | +  | Sjp_0010300.1 | NA                         | NA       |
| HSB10kb_114 | 1     | 47239618 | 47862347 | SJC_S000037 | 2675   | 679685 | +  | Sjp_0010310.1 | NA                         | NA       |
| unknown     | NA    | NA       | NA       | SJC_S000038 | NA     | NA     | NA | Sjp_0010320.1 | channel regulator activity | NA       |
| HSB10kb_115 | 4     | 27811095 | 27840459 | SJC_S000038 | 113961 | 137569 | -  | Sjp_0010330.1 | cell part                  | 0.009037 |
| unknown     | NA    | NA       | NA       | SJC_S000038 | NA     | NA     | NA | Sjp_0010340.1 | NA                         | NA       |
| unknown     | NA    | NA       | NA       | SJC_S000038 | NA     | NA     | NA | Sjp_0010350.1 | NA                         | NA       |
| unknown     | NA    | NA       | NA       | SJC_S000038 | NA     | NA     | NA | Sjp_0010360.1 | NA                         | NA       |
| unknown     | NA    | NA       | NA       | SJC_S000038 | NA     | NA     | NA | Sjp_0010370.1 | NA                         | NA       |
| HSB10kb_116 | 1     | 49851622 | 49987996 | SJC_S000039 | 1610   | 120090 | +  | Sjp_0010380.1 | NA                         | NA       |
| HSB10kb_116 | 1     | 49851622 | 49987996 | SJC_S000039 | 1610   | 120090 | +  | Sjp_0010390.1 | cell part                  | 0.009037 |
| HSB10kb_116 | 1     | 49851622 | 49987996 | SJC_S000039 | 1610   | 120090 | +  | Sjp_0010400.1 | NA                         | NA       |
| EBR10kb_83  | "1,1" | NA       | NA       | SJC_S000039 | 120091 | 156892 | NA | Sjp_0010420.1 | NA                         | NA       |
| HSB10kb_117 | 1     | 49771137 | 49793681 | SJC_S000039 | 156893 | 193556 | +  | Sjp_0010430.1 | NA                         | NA       |
| EBR10kb_84  | "1,1" | NA       | NA       | SJC_S000039 | 193557 | 197229 | NA | Sjp_0010440.1 | NA                         | NA       |
| HSB10kb_118 | 1     | 49640967 | 49762027 | SJC_S000039 | 197230 | 335525 | -  | Sjp_0010440.1 | NA                         | NA       |
| HSB10kb_118 | 1     | 49640967 | 49762027 | SJC_S000039 | 197230 | 335525 | -  | Sjp_0010450.1 | NA                         | NA       |
| HSB10kb_118 | 1     | 49640967 | 49762027 | SJC_S000039 | 197230 | 335525 | -  | Sjp_0010460.1 | NA                         | NA       |

|             |       |          |          |             |        |        |    |               |                                                        |          |
|-------------|-------|----------|----------|-------------|--------|--------|----|---------------|--------------------------------------------------------|----------|
| HSB10kb_118 | 1     | 49640967 | 49762027 | SJC_S000039 | 197230 | 335525 | -  | Sjp_0010470.1 | NA                                                     | NA       |
| EBR10kb_85  | "1,1" | NA       | NA       | SJC_S000039 | 335526 | 361535 | NA | Sjp_0010480.1 | catalytic activity                                     | 0.035844 |
| HSB10kb_119 | 1     | 49834947 | 49850603 | SJC_S000039 | 361536 | 387697 | -  | Sjp_0010480.1 | catalytic activity                                     | 0.035844 |
| EBR10kb_86  | "1,1" | NA       | NA       | SJC_S000039 | 387698 | 418326 | NA | NA            | NA                                                     | NA       |
| HSB10kb_120 | 1     | 50002947 | 50272653 | SJC_S000039 | 418327 | 672942 | +  | Sjp_0010490.1 | catalytic activity                                     | 0.035844 |
| HSB10kb_120 | 1     | 50002947 | 50272653 | SJC_S000039 | 418327 | 672942 | +  | Sjp_0010500.1 | NA                                                     | NA       |
| HSB10kb_120 | 1     | 50002947 | 50272653 | SJC_S000039 | 418327 | 672942 | +  | Sjp_0010520.1 | protein binding<br>transcription<br>factor activity    | NA       |
| HSB10kb_120 | 1     | 50002947 | 50272653 | SJC_S000039 | 418327 | 672942 | +  | Sjp_0010530.1 | cell part                                              | 0.009037 |
| unknown     | NA    | NA       | NA       | SJC_S000040 | NA     | NA     | NA | Sjp_0010540.1 | cell part                                              | 0.009037 |
| unknown     | NA    | NA       | NA       | SJC_S000040 | NA     | NA     | NA | Sjp_0010550.1 | biological<br>regulation                               | 0.76396  |
| unknown     | NA    | NA       | NA       | SJC_S000040 | NA     | NA     | NA | Sjp_0010560.1 | NA                                                     | NA       |
| unknown     | NA    | NA       | NA       | SJC_S000040 | NA     | NA     | NA | Sjp_0010570.1 | NA                                                     | NA       |
| unknown     | NA    | NA       | NA       | SJC_S000040 | NA     | NA     | NA | Sjp_0010580.1 | NA                                                     | NA       |
| unknown     | NA    | NA       | NA       | SJC_S000040 | NA     | NA     | NA | Sjp_0010590.1 | catalytic activity                                     | 0.035844 |
| unknown     | NA    | NA       | NA       | SJC_S000040 | NA     | NA     | NA | Sjp_0010600.1 | NA                                                     | NA       |
| unknown     | NA    | NA       | NA       | SJC_S000040 | NA     | NA     | NA | Sjp_0010610.1 | NA                                                     | NA       |
| unknown     | NA    | NA       | NA       | SJC_S000040 | NA     | NA     | NA | Sjp_0010620.1 | NA                                                     | NA       |
| unknown     | NA    | NA       | NA       | SJC_S000040 | NA     | NA     | NA | Sjp_0010630.1 | NA                                                     | NA       |
| unknown     | NA    | NA       | NA       | SJC_S000040 | NA     | NA     | NA | Sjp_0010640.1 | NA                                                     | NA       |
| unknown     | NA    | NA       | NA       | SJC_S000040 | NA     | NA     | NA | Sjp_0010650.1 | catalytic activity                                     | 0.035844 |
| unknown     | NA    | NA       | NA       | SJC_S000040 | NA     | NA     | NA | Sjp_0010660.1 | catalytic activity                                     | 0.035844 |
| unknown     | NA    | NA       | NA       | SJC_S000040 | NA     | NA     | NA | Sjp_0010670.1 | NA                                                     | NA       |
| unknown     | NA    | NA       | NA       | SJC_S000040 | NA     | NA     | NA | Sjp_0010680.1 | NA                                                     | NA       |
| unknown     | NA    | NA       | NA       | SJC_S000040 | NA     | NA     | NA | Sjp_0010690.1 | cellular<br>component<br>organization or<br>biogenesis | NA       |
| unknown     | NA    | NA       | NA       | SJC_S000040 | NA     | NA     | NA | Sjp_0010700.1 | NA                                                     | NA       |
| unknown     | NA    | NA       | NA       | SJC_S000040 | NA     | NA     | NA | Sjp_0010710.1 | NA                                                     | NA       |
| unknown     | NA    | NA       | NA       | SJC_S000040 | NA     | NA     | NA | Sjp_0010720.1 | catalytic activity                                     | 0.035844 |
| HSB10kb_121 | 1     | 18362177 | 18383267 | SJC_S000040 | 689101 | 714806 | -  | Sjp_0010730.1 | catalytic activity                                     | 0.035844 |

|             |         |         |         |             |        |        |    |               |                                               |          |
|-------------|---------|---------|---------|-------------|--------|--------|----|---------------|-----------------------------------------------|----------|
| unknown     | NA      | NA      | NA      | SJC_S000040 | NA     | NA     | NA | Sjp_0010740.1 | NA                                            | NA       |
| unknown     | NA      | NA      | NA      | SJC_S000040 | NA     | NA     | NA | Sjp_0010750.1 | biological regulation                         | 0.76396  |
| unknown     | NA      | NA      | NA      | SJC_S000040 | NA     | NA     | NA | Sjp_0010760.1 | NA                                            | NA       |
| unknown     | NA      | NA      | NA      | SJC_S000040 | NA     | NA     | NA | Sjp_0010770.1 | NA                                            | NA       |
| unknown     | NA      | NA      | NA      | SJC_S000041 | NA     | NA     | NA | Sjp_0010780.1 | NA                                            | NA       |
| unknown     | NA      | NA      | NA      | SJC_S000041 | NA     | NA     | NA | Sjp_0010790.1 | NA                                            | NA       |
| unknown     | NA      | NA      | NA      | SJC_S000041 | NA     | NA     | NA | Sjp_0010800.1 | catalytic activity                            | 0.035844 |
| unknown     | NA      | NA      | NA      | SJC_S000041 | NA     | NA     | NA | Sjp_0010810.1 | NA                                            | NA       |
| unknown     | NA      | NA      | NA      | SJC_S000041 | NA     | NA     | NA | Sjp_0010820.1 | response to stimulus                          | NA       |
| unknown     | NA      | NA      | NA      | SJC_S000041 | NA     | NA     | NA | Sjp_0010830.1 | binding                                       | 0.052762 |
| unknown     | NA      | NA      | NA      | SJC_S000041 | NA     | NA     | NA | Sjp_0010840.1 | NA                                            | NA       |
| unknown     | NA      | NA      | NA      | SJC_S000041 | NA     | NA     | NA | Sjp_0010850.1 | NA                                            | NA       |
| unknown     | NA      | NA      | NA      | SJC_S000041 | NA     | NA     | NA | Sjp_0010860.1 | NA                                            | NA       |
| unknown     | NA      | NA      | NA      | SJC_S000041 | NA     | NA     | NA | Sjp_0010870.1 | NA                                            | NA       |
| HSB10kb_122 | WZ      | 1451129 | 1496345 | SJC_S000041 | 500155 | 540843 | -  | Sjp_0010880.1 | NA                                            | NA       |
| EBR10kb_87  | "WZ,WZ" | NA      | NA      | SJC_S000041 | 540844 | 685856 | NA | Sjp_0010890.1 | NA                                            | NA       |
| EBR10kb_87  | "WZ,WZ" | NA      | NA      | SJC_S000041 | 540844 | 685856 | NA | Sjp_0010900.1 | NA                                            | NA       |
| HSB10kb_123 | WZ      | 3146814 | 3447259 | SJC_S000041 | 685857 | 939885 | -  | Sjp_0010910.1 | NA                                            | NA       |
| HSB10kb_123 | WZ      | 3146814 | 3447259 | SJC_S000041 | 685857 | 939885 | -  | Sjp_0010920.1 | NA                                            | NA       |
| HSB10kb_123 | WZ      | 3146814 | 3447259 | SJC_S000041 | 685857 | 939885 | -  | Sjp_0010930.1 | binding                                       | 0.052762 |
| HSB10kb_123 | WZ      | 3146814 | 3447259 | SJC_S000041 | 685857 | 939885 | -  | Sjp_0010940.1 | NA                                            | NA       |
| HSB10kb_123 | WZ      | 3146814 | 3447259 | SJC_S000041 | 685857 | 939885 | -  | Sjp_0010950.1 | protein binding transcription factor activity | NA       |
| HSB10kb_123 | WZ      | 3146814 | 3447259 | SJC_S000041 | 685857 | 939885 | -  | Sjp_0010960.1 | NA                                            | NA       |
| HSB10kb_123 | WZ      | 3146814 | 3447259 | SJC_S000041 | 685857 | 939885 | -  | Sjp_0010970.1 | cellular process                              | 0.63852  |
| HSB10kb_123 | WZ      | 3146814 | 3447259 | SJC_S000041 | 685857 | 939885 | -  | Sjp_0010980.1 | NA                                            | NA       |
| HSB10kb_123 | WZ      | 3146814 | 3447259 | SJC_S000041 | 685857 | 939885 | -  | Sjp_0010990.1 | NA                                            | NA       |
| HSB10kb_124 | WZ      | 6182200 | 6228174 | SJC_S000042 | 1446   | 58242  | -  | Sjp_0011000.1 | catalytic activity                            | 0.035844 |
| HSB10kb_124 | WZ      | 6182200 | 6228174 | SJC_S000042 | 1446   | 58242  | -  | Sjp_0011010.1 | catalytic activity                            | 0.035844 |
| HSB10kb_124 | WZ      | 6182200 | 6228174 | SJC_S000042 | 1446   | 58242  | -  | Sjp_0011020.1 | NA                                            | NA       |
| EBR10kb_88  | "WZ,WZ" | NA      | NA      | SJC_S000042 | 58243  | 74589  | NA | Sjp_0011030.1 | catalytic activity                            | 0.035844 |



|             |       |          |          |             |        |        |    |               |                       |          |
|-------------|-------|----------|----------|-------------|--------|--------|----|---------------|-----------------------|----------|
| HSB10kb_125 | WZ    | 6233234  | 6394843  | SJC_S000042 | 74590  | 250949 | +  | Sjp_0011030.1 | catalytic activity    | 0.035844 |
| HSB10kb_125 | WZ    | 6233234  | 6394843  | SJC_S000042 | 74590  | 250949 | +  | Sjp_0011040.1 | NA                    | NA       |
| HSB10kb_125 | WZ    | 6233234  | 6394843  | SJC_S000042 | 74590  | 250949 | +  | Sjp_0011050.1 | metabolic process     | 0.41934  |
| HSB10kb_125 | WZ    | 6233234  | 6394843  | SJC_S000042 | 74590  | 250949 | +  | Sjp_0011060.1 | NA                    | NA       |
| HSB10kb_125 | WZ    | 6233234  | 6394843  | SJC_S000042 | 74590  | 250949 | +  | Sjp_0011070.1 | catalytic activity    | 0.035844 |
| HSB10kb_125 | WZ    | 6233234  | 6394843  | SJC_S000042 | 74590  | 250949 | +  | Sjp_0011080.1 | NA                    | NA       |
| HSB10kb_125 | WZ    | 6233234  | 6394843  | SJC_S000042 | 74590  | 250949 | +  | Sjp_0011090.1 | transporter activity  | 0.782    |
| unknown     | NA    | NA       | NA       | SJC_S000042 | NA     | NA     | NA | Sjp_0011100.1 | NA                    | NA       |
| unknown     | NA    | NA       | NA       | SJC_S000042 | NA     | NA     | NA | Sjp_0011120.1 | catalytic activity    | 0.035844 |
| unknown     | NA    | NA       | NA       | SJC_S000042 | NA     | NA     | NA | Sjp_0011130.1 | NA                    | NA       |
| unknown     | NA    | NA       | NA       | SJC_S000042 | NA     | NA     | NA | Sjp_0011140.1 | NA                    | NA       |
| HSB10kb_126 | 7     | 7745136  | 7768843  | SJC_S000043 | 22020  | 46211  | +  | Sjp_0011150.1 | cellular process      | 0.63852  |
| EBR10kb_89  | "7,7" | NA       | NA       | SJC_S000043 | 46212  | 67413  | NA | Sjp_0011150.1 | cellular process      | 0.63852  |
| EBR10kb_89  | "7,7" | NA       | NA       | SJC_S000043 | 46212  | 67413  | NA | Sjp_0011160.1 | NA                    | NA       |
| HSB10kb_127 | 7     | 7654542  | 7689068  | SJC_S000043 | 67414  | 129298 | +  | Sjp_0011160.1 | NA                    | NA       |
| EBR10kb_90  | "7,7" | NA       | NA       | SJC_S000043 | 129299 | 138901 | NA | Sjp_0011170.1 | biological regulation | 0.76396  |
| HSB10kb_128 | 7     | 7605678  | 7641659  | SJC_S000043 | 138902 | 172769 | -  | Sjp_0011170.1 | biological regulation | 0.76396  |
| HSB10kb_128 | 7     | 7605678  | 7641659  | SJC_S000043 | 138902 | 172769 | -  | Sjp_0011180.1 | catalytic activity    | 0.035844 |
| unknown     | NA    | NA       | NA       | SJC_S000043 | NA     | NA     | NA | Sjp_0011190.1 | NA                    | NA       |
| unknown     | NA    | NA       | NA       | SJC_S000043 | NA     | NA     | NA | Sjp_0011200.1 | NA                    | NA       |
| unknown     | NA    | NA       | NA       | SJC_S000044 | NA     | NA     | NA | Sjp_0011210.1 | NA                    | NA       |
| unknown     | NA    | NA       | NA       | SJC_S000044 | NA     | NA     | NA | Sjp_0011220.1 | catalytic activity    | 0.035844 |
| unknown     | NA    | NA       | NA       | SJC_S000044 | NA     | NA     | NA | Sjp_0011230.1 | NA                    | NA       |
| unknown     | NA    | NA       | NA       | SJC_S000044 | NA     | NA     | NA | Sjp_0011240.1 | NA                    | NA       |
| unknown     | NA    | NA       | NA       | SJC_S000044 | NA     | NA     | NA | Sjp_0011250.1 | NA                    | NA       |
| unknown     | NA    | NA       | NA       | SJC_S000044 | NA     | NA     | NA | Sjp_0011260.1 | catalytic activity    | 0.035844 |
| HSB10kb_129 | 3     | 17302053 | 17329302 | SJC_S000045 | 2343   | 25935  | -  | Sjp_0011270.1 | transporter activity  | 0.782    |
| EBR10kb_91  | "3,3" | NA       | NA       | SJC_S000045 | 25936  | 51493  | NA | Sjp_0011270.1 | transporter activity  | 0.782    |

|             |       |          |          |             |        |        |    |               |                                    |          |
|-------------|-------|----------|----------|-------------|--------|--------|----|---------------|------------------------------------|----------|
| EBR10kb_91  | "3,3" | NA       | NA       | SJC_S000045 | 25936  | 51493  | NA | Sjp_0011280.1 | cell part                          | 0.009037 |
| HSB10kb_130 | 3     | 14289204 | 14310599 | SJC_S000045 | 51494  | 72375  | +  | Sjp_0011280.1 | cell part                          | 0.009037 |
| HSB10kb_130 | 3     | 14289204 | 14310599 | SJC_S000045 | 51494  | 72375  | +  | Sjp_0011290.1 | cell part                          | 0.009037 |
| EBR10kb_92  | "3,3" | NA       | NA       | SJC_S000045 | 72376  | 83986  | NA | Sjp_0011290.1 | cell part                          | 0.009037 |
| EBR10kb_92  | "3,3" | NA       | NA       | SJC_S000045 | 72376  | 83986  | NA | Sjp_0011300.1 | transporter activity               | 0.782    |
| HSB10kb_131 | 3     | 17336038 | 17564748 | SJC_S000045 | 83987  | 233130 | +  | Sjp_0011300.1 | transporter activity               | 0.782    |
| HSB10kb_131 | 3     | 17336038 | 17564748 | SJC_S000045 | 83987  | 233130 | +  | Sjp_0011310.1 | catalytic activity                 | 0.035844 |
| HSB10kb_131 | 3     | 17336038 | 17564748 | SJC_S000045 | 83987  | 233130 | +  | Sjp_0011320.1 | NA                                 | NA       |
| HSB10kb_131 | 3     | 17336038 | 17564748 | SJC_S000045 | 83987  | 233130 | +  | Sjp_0011330.1 | catalytic activity                 | 0.035844 |
| HSB10kb_131 | 3     | 17336038 | 17564748 | SJC_S000045 | 83987  | 233130 | +  | Sjp_0011340.1 | catalytic activity                 | 0.035844 |
| HSB10kb_131 | 3     | 17336038 | 17564748 | SJC_S000045 | 83987  | 233130 | +  | Sjp_0011350.1 | NA                                 | NA       |
| EBR10kb_93  | "3,3" | NA       | NA       | SJC_S000045 | 233131 | 285195 | NA | Sjp_0011350.1 | NA                                 | NA       |
| EBR10kb_93  | "3,3" | NA       | NA       | SJC_S000045 | 233131 | 285195 | NA | Sjp_0011360.1 | binding                            | 0.052762 |
| EBR10kb_93  | "3,3" | NA       | NA       | SJC_S000045 | 233131 | 285195 | NA | Sjp_0011370.1 | binding                            | 0.052762 |
| EBR10kb_93  | "3,3" | NA       | NA       | SJC_S000045 | 233131 | 285195 | NA | Sjp_0011380.1 | NA                                 | NA       |
| HSB10kb_132 | 3     | 16334428 | 16402915 | SJC_S000045 | 285196 | 347668 | +  | Sjp_0011380.1 | NA                                 | NA       |
| HSB10kb_132 | 3     | 16334428 | 16402915 | SJC_S000045 | 285196 | 347668 | +  | Sjp_0011390.1 | NA                                 | NA       |
| HSB10kb_132 | 3     | 16334428 | 16402915 | SJC_S000045 | 285196 | 347668 | +  | Sjp_0011400.1 | NA                                 | NA       |
| EBR10kb_94  | "3,3" | NA       | NA       | SJC_S000045 | 347669 | 366673 | NA | Sjp_0011400.1 | NA                                 | NA       |
| EBR10kb_94  | "3,3" | NA       | NA       | SJC_S000045 | 347669 | 366673 | NA | Sjp_0011410.1 | binding                            | 0.052762 |
| EBR10kb_94  | "3,3" | NA       | NA       | SJC_S000045 | 347669 | 366673 | NA | Sjp_0011420.1 | transporter activity               | 0.782    |
| HSB10kb_133 | 3     | 16230153 | 16265941 | SJC_S000045 | 366674 | 426258 | -  | Sjp_0011420.1 | transporter activity               | 0.782    |
| HSB10kb_133 | 3     | 16230153 | 16265941 | SJC_S000045 | 366674 | 426258 | -  | Sjp_0011430.1 | transporter activity               | 0.782    |
| HSB10kb_133 | 3     | 16230153 | 16265941 | SJC_S000045 | 366674 | 426258 | -  | Sjp_0011440.1 | NA                                 | NA       |
| HSB10kb_133 | 3     | 16230153 | 16265941 | SJC_S000045 | 366674 | 426258 | -  | Sjp_0011450.1 | NA                                 | NA       |
| EBR10kb_95  | "3,3" | NA       | NA       | SJC_S000045 | 426259 | 549775 | NA | Sjp_0011460.1 | binding                            | 0.052762 |
| EBR10kb_95  | "3,3" | NA       | NA       | SJC_S000045 | 426259 | 549775 | NA | Sjp_0011470.1 | cellular component organization or | NA       |

|             |       |          |          |             |        |        |    |               |                       |         |
|-------------|-------|----------|----------|-------------|--------|--------|----|---------------|-----------------------|---------|
|             |       |          |          |             |        |        |    |               | biogenesis            |         |
| EBR10kb_95  | "3,3" | NA       | NA       | SJC_S000045 | 426259 | 549775 | NA | Sjp_0011480.1 | biological regulation | 0.76396 |
| EBR10kb_95  | "3,3" | NA       | NA       | SJC_S000045 | 426259 | 549775 | NA | Sjp_0011490.1 | NA                    | NA      |
| EBR10kb_95  | "3,3" | NA       | NA       | SJC_S000045 | 426259 | 549775 | NA | Sjp_0011500.1 | NA                    | NA      |
| HSB10kb_134 | 3     | 16097070 | 16119166 | SJC_S000045 | 549776 | 561283 | +  | Sjp_0011500.1 | NA                    | NA      |
| EBR10kb_96  | "3,3" | NA       | NA       | SJC_S000045 | 561284 | 734519 | NA | Sjp_0011510.1 | NA                    | NA      |
| EBR10kb_96  | "3,3" | NA       | NA       | SJC_S000045 | 561284 | 734519 | NA | Sjp_0011520.1 | NA                    | NA      |
| EBR10kb_96  | "3,3" | NA       | NA       | SJC_S000045 | 561284 | 734519 | NA | Sjp_0011530.1 | NA                    | NA      |
| EBR10kb_96  | "3,3" | NA       | NA       | SJC_S000045 | 561284 | 734519 | NA | Sjp_0011540.1 | NA                    | NA      |
| HSB10kb_135 | 3     | 21947114 | 22045730 | SJC_S000045 | 734520 | 859471 | +  | Sjp_0011550.1 | metabolic process     | 0.41934 |
| HSB10kb_135 | 3     | 21947114 | 22045730 | SJC_S000045 | 734520 | 859471 | +  | Sjp_0011560.1 | NA                    | NA      |
| HSB10kb_135 | 3     | 21947114 | 22045730 | SJC_S000045 | 734520 | 859471 | +  | Sjp_0011570.1 | metabolic process     | 0.41934 |
| unknown     | NA    | NA       | NA       | SJC_S000045 | NA     | NA     | NA | Sjp_0011580.1 | NA                    | NA      |
| unknown     | NA    | NA       | NA       | SJC_S000046 | NA     | NA     | NA | Sjp_0011590.1 | NA                    | NA      |
| HSB10kb_136 | 1     | 4718805  | 5157329  | SJC_S000046 | 26922  | 491202 | +  | Sjp_0011600.1 | NA                    | NA      |
| HSB10kb_136 | 1     | 4718805  | 5157329  | SJC_S000046 | 26922  | 491202 | +  | Sjp_0011610.1 | NA                    | NA      |
| HSB10kb_136 | 1     | 4718805  | 5157329  | SJC_S000046 | 26922  | 491202 | +  | Sjp_0011620.1 | biological regulation | 0.76396 |
| HSB10kb_136 | 1     | 4718805  | 5157329  | SJC_S000046 | 26922  | 491202 | +  | Sjp_0011630.1 | biological regulation | 0.76396 |
| HSB10kb_136 | 1     | 4718805  | 5157329  | SJC_S000046 | 26922  | 491202 | +  | Sjp_0011640.1 | NA                    | NA      |
| HSB10kb_136 | 1     | 4718805  | 5157329  | SJC_S000046 | 26922  | 491202 | +  | Sjp_0011650.1 | NA                    | NA      |
| HSB10kb_136 | 1     | 4718805  | 5157329  | SJC_S000046 | 26922  | 491202 | +  | Sjp_0011660.1 | NA                    | NA      |
| EBR10kb_97  | "1,1" | NA       | NA       | SJC_S000046 | 491203 | 576840 | NA | Sjp_0011670.1 | NA                    | NA      |
| EBR10kb_97  | "1,1" | NA       | NA       | SJC_S000046 | 491203 | 576840 | NA | Sjp_0011680.1 | NA                    | NA      |
| HSB10kb_137 | 1     | 5305382  | 5386410  | SJC_S000046 | 576841 | 638336 | +  | Sjp_0011680.1 | NA                    | NA      |
| unknown     | NA    | NA       | NA       | SJC_S000047 | NA     | NA     | NA | Sjp_0011710.1 | NA                    | NA      |
| unknown     | NA    | NA       | NA       | SJC_S000047 | NA     | NA     | NA | Sjp_0011720.1 | NA                    | NA      |
| unknown     | NA    | NA       | NA       | SJC_S000047 | NA     | NA     | NA | Sjp_0011730.1 | NA                    | NA      |
| unknown     | NA    | NA       | NA       | SJC_S000047 | NA     | NA     | NA | Sjp_0011740.1 | NA                    | NA      |
| unknown     | NA    | NA       | NA       | SJC_S000047 | NA     | NA     | NA | Sjp_0011750.1 | biological            | 0.76396 |

|             |       |          |          |             |        |        |    |               |                               |          |
|-------------|-------|----------|----------|-------------|--------|--------|----|---------------|-------------------------------|----------|
|             |       |          |          |             |        |        |    |               | regulation                    |          |
| unknown     | NA    | NA       | NA       | SJC_S000048 | NA     | NA     | NA | Sjp_0011770.1 | NA                            | NA       |
| unknown     | NA    | NA       | NA       | SJC_S000048 | NA     | NA     | NA | Sjp_0011780.1 | NA                            | NA       |
| unknown     | NA    | NA       | NA       | SJC_S000048 | NA     | NA     | NA | Sjp_0011790.1 | NA                            | NA       |
| unknown     | NA    | NA       | NA       | SJC_S000048 | NA     | NA     | NA | Sjp_0011800.1 | NA                            | NA       |
| unknown     | NA    | NA       | NA       | SJC_S000048 | NA     | NA     | NA | Sjp_0011810.1 | biological regulation         | 0.76396  |
| unknown     | NA    | NA       | NA       | SJC_S000048 | NA     | NA     | NA | Sjp_0011820.1 | NA                            | NA       |
| unknown     | NA    | NA       | NA       | SJC_S000048 | NA     | NA     | NA | Sjp_0011830.1 | biological regulation         | 0.76396  |
| unknown     | NA    | NA       | NA       | SJC_S000048 | NA     | NA     | NA | Sjp_0011840.1 | cell part                     | 0.009037 |
| unknown     | NA    | NA       | NA       | SJC_S000048 | NA     | NA     | NA | Sjp_0011850.1 | NA                            | NA       |
| unknown     | NA    | NA       | NA       | SJC_S000048 | NA     | NA     | NA | Sjp_0011860.1 | NA                            | NA       |
| unknown     | NA    | NA       | NA       | SJC_S000048 | NA     | NA     | NA | Sjp_0011870.1 | cell part                     | 0.009037 |
| unknown     | NA    | NA       | NA       | SJC_S000048 | NA     | NA     | NA | Sjp_0011880.1 | NA                            | NA       |
| unknown     | NA    | NA       | NA       | SJC_S000048 | NA     | NA     | NA | Sjp_0011890.1 | NA                            | NA       |
| unknown     | NA    | NA       | NA       | SJC_S000048 | NA     | NA     | NA | Sjp_0011900.1 | NA                            | NA       |
| unknown     | NA    | NA       | NA       | SJC_S000048 | NA     | NA     | NA | Sjp_0011910.1 | molecular transducer activity | 0.50162  |
| unknown     | NA    | NA       | NA       | SJC_S000048 | NA     | NA     | NA | Sjp_0011920.1 | cell part                     | 0.009037 |
| unknown     | NA    | NA       | NA       | SJC_S000048 | NA     | NA     | NA | Sjp_0011930.1 | cell part                     | 0.009037 |
| HSB10kb_138 | 3     | 18735627 | 18797444 | SJC_S000048 | 779769 | 845188 | -  | Sjp_0011940.1 | NA                            | NA       |
| HSB10kb_138 | 3     | 18735627 | 18797444 | SJC_S000048 | 779769 | 845188 | -  | Sjp_0011950.1 | NA                            | NA       |
| EBR10kb_98  | "3,3" | NA       | NA       | SJC_S000048 | 845189 | 860637 | NA | Sjp_0011960.1 | NA                            | NA       |
| EBR10kb_98  | "3,3" | NA       | NA       | SJC_S000048 | 845189 | 860637 | NA | Sjp_0011970.1 | NA                            | NA       |
| HSB10kb_139 | 3     | 18688288 | 18722205 | SJC_S000048 | 860638 | 905737 | +  | Sjp_0011970.1 | NA                            | NA       |
| HSB10kb_139 | 3     | 18688288 | 18722205 | SJC_S000048 | 860638 | 905737 | +  | Sjp_0011980.1 | NA                            | NA       |
| HSB10kb_139 | 3     | 18688288 | 18722205 | SJC_S000048 | 860638 | 905737 | +  | Sjp_0011990.1 | NA                            | NA       |
| HSB10kb_139 | 3     | 18688288 | 18722205 | SJC_S000048 | 860638 | 905737 | +  | Sjp_0012000.1 | NA                            | NA       |
| EBR10kb_99  | "3,3" | NA       | NA       | SJC_S000048 | 905738 | 918548 | NA | Sjp_0012010.1 | NA                            | NA       |
| EBR10kb_99  | "3,3" | NA       | NA       | SJC_S000048 | 905738 | 918548 | NA | Sjp_0012020.1 | NA                            | NA       |
| HSB10kb_140 | 3     | 18646841 | 18678112 | SJC_S000048 | 918549 | 943186 | -  | Sjp_0012020.1 | NA                            | NA       |
| HSB10kb_141 | 5     | 2148396  | 2327235  | SJC_S000050 | 12533  | 181764 | +  | Sjp_0012030.1 | NA                            | NA       |

|             |       |          |          |             |        |        |    |               |                               |          |
|-------------|-------|----------|----------|-------------|--------|--------|----|---------------|-------------------------------|----------|
| HSB10kb_141 | 5     | 2148396  | 2327235  | SJC_S000050 | 12533  | 181764 | +  | Sjp_0012040.1 | binding                       | 0.052762 |
| HSB10kb_141 | 5     | 2148396  | 2327235  | SJC_S000050 | 12533  | 181764 | +  | Sjp_0012050.1 | catalytic activity            | 0.035844 |
| HSB10kb_141 | 5     | 2148396  | 2327235  | SJC_S000050 | 12533  | 181764 | +  | Sjp_0012060.1 | NA                            | NA       |
| HSB10kb_141 | 5     | 2148396  | 2327235  | SJC_S000050 | 12533  | 181764 | +  | Sjp_0012070.1 | NA                            | NA       |
| EBR10kb_100 | "5,3" | NA       | NA       | SJC_S000050 | 181765 | 203114 | NA | Sjp_0012070.1 | NA                            | NA       |
| EBR10kb_100 | "5,3" | NA       | NA       | SJC_S000050 | 181765 | 203114 | NA | Sjp_0012080.1 | NA                            | NA       |
| EBR10kb_100 | "5,3" | NA       | NA       | SJC_S000050 | 181765 | 203114 | NA | Sjp_0012090.1 | NA                            | NA       |
| HSB10kb_142 | 3     | 20055172 | 20074495 | SJC_S000050 | 203115 | 222820 | -  | Sjp_0012090.1 | NA                            | NA       |
| HSB10kb_142 | 3     | 20055172 | 20074495 | SJC_S000050 | 203115 | 222820 | -  | Sjp_0012100.1 | NA                            | NA       |
| EBR10kb_101 | "3,3" | NA       | NA       | SJC_S000050 | 222821 | 243167 | NA | Sjp_0012110.1 | NA                            | NA       |
| HSB10kb_143 | 3     | 20089499 | 20230085 | SJC_S000050 | 243168 | 366399 | +  | Sjp_0012110.1 | NA                            | NA       |
| HSB10kb_143 | 3     | 20089499 | 20230085 | SJC_S000050 | 243168 | 366399 | +  | Sjp_0012120.1 | NA                            | NA       |
| HSB10kb_143 | 3     | 20089499 | 20230085 | SJC_S000050 | 243168 | 366399 | +  | Sjp_0012130.1 | molecular transducer activity | 0.50162  |
| HSB10kb_143 | 3     | 20089499 | 20230085 | SJC_S000050 | 243168 | 366399 | +  | Sjp_0012140.1 | binding                       | 0.052762 |
| HSB10kb_143 | 3     | 20089499 | 20230085 | SJC_S000050 | 243168 | 366399 | +  | Sjp_0012150.1 | NA                            | NA       |
| unknown     | NA    | NA       | NA       | SJC_S000050 | NA     | NA     | NA | Sjp_0012160.1 | catalytic activity            | 0.035844 |
| unknown     | NA    | NA       | NA       | SJC_S000050 | NA     | NA     | NA | Sjp_0012170.1 | NA                            | NA       |
| unknown     | NA    | NA       | NA       | SJC_S000050 | NA     | NA     | NA | Sjp_0012180.1 | NA                            | NA       |
| unknown     | NA    | NA       | NA       | SJC_S000051 | NA     | NA     | NA | Sjp_0012190.1 | NA                            | NA       |
| unknown     | NA    | NA       | NA       | SJC_S000051 | NA     | NA     | NA | Sjp_0012200.1 | NA                            | NA       |
| HSB10kb_144 | WZ    | 49100103 | 49359569 | SJC_S000051 | 57007  | 361639 | -  | Sjp_0012210.1 | catalytic activity            | 0.035844 |
| HSB10kb_144 | WZ    | 49100103 | 49359569 | SJC_S000051 | 57007  | 361639 | -  | Sjp_0012220.1 | NA                            | NA       |
| HSB10kb_144 | WZ    | 49100103 | 49359569 | SJC_S000051 | 57007  | 361639 | -  | Sjp_0012230.1 | NA                            | NA       |
| HSB10kb_144 | WZ    | 49100103 | 49359569 | SJC_S000051 | 57007  | 361639 | -  | Sjp_0012240.1 | catalytic activity            | 0.035844 |
| HSB10kb_144 | WZ    | 49100103 | 49359569 | SJC_S000051 | 57007  | 361639 | -  | Sjp_0012250.1 | NA                            | NA       |
| HSB10kb_144 | WZ    | 49100103 | 49359569 | SJC_S000051 | 57007  | 361639 | -  | Sjp_0012260.1 | NA                            | NA       |
| HSB10kb_144 | WZ    | 49100103 | 49359569 | SJC_S000051 | 57007  | 361639 | -  | Sjp_0012270.1 | NA                            | NA       |
| HSB10kb_144 | WZ    | 49100103 | 49359569 | SJC_S000051 | 57007  | 361639 | -  | Sjp_0012280.1 | catalytic activity            | 0.035844 |
| HSB10kb_144 | WZ    | 49100103 | 49359569 | SJC_S000051 | 57007  | 361639 | -  | Sjp_0012290.1 | catalytic activity            | 0.035844 |
| unknown     | NA    | NA       | NA       | SJC_S000051 | NA     | NA     | NA | Sjp_0012300.1 | NA                            | NA       |
| unknown     | NA    | NA       | NA       | SJC_S000052 | NA     | NA     | NA | Sjp_0012310.1 | cell part                     | 0.009037 |
| unknown     | NA    | NA       | NA       | SJC_S000052 | NA     | NA     | NA | Sjp_0012320.1 | NA                            | NA       |

|             |       |          |          |             |        |        |    |               |                       |          |
|-------------|-------|----------|----------|-------------|--------|--------|----|---------------|-----------------------|----------|
| unknown     | NA    | NA       | NA       | SJC_S000052 | NA     | NA     | NA | Sjp_0012330.1 | NA                    | NA       |
| unknown     | NA    | NA       | NA       | SJC_S000052 | NA     | NA     | NA | Sjp_0012340.1 | NA                    | NA       |
| unknown     | NA    | NA       | NA       | SJC_S000052 | NA     | NA     | NA | Sjp_0012350.1 | NA                    | NA       |
| unknown     | NA    | NA       | NA       | SJC_S000052 | NA     | NA     | NA | Sjp_0012360.1 | NA                    | NA       |
| HSB10kb_145 | 4     | 19482941 | 20179101 | SJC_S000052 | 138194 | 859755 | -  | Sjp_0012370.1 | catalytic activity    | 0.035844 |
| HSB10kb_145 | 4     | 19482941 | 20179101 | SJC_S000052 | 138194 | 859755 | -  | Sjp_0012380.1 | biological regulation | 0.76396  |
| HSB10kb_145 | 4     | 19482941 | 20179101 | SJC_S000052 | 138194 | 859755 | -  | Sjp_0012390.1 | NA                    | NA       |
| HSB10kb_145 | 4     | 19482941 | 20179101 | SJC_S000052 | 138194 | 859755 | -  | Sjp_0012400.1 | NA                    | NA       |
| HSB10kb_145 | 4     | 19482941 | 20179101 | SJC_S000052 | 138194 | 859755 | -  | Sjp_0012410.1 | binding               | 0.052762 |
| HSB10kb_145 | 4     | 19482941 | 20179101 | SJC_S000052 | 138194 | 859755 | -  | Sjp_0012420.1 | NA                    | NA       |
| HSB10kb_145 | 4     | 19482941 | 20179101 | SJC_S000052 | 138194 | 859755 | -  | Sjp_0012430.1 | NA                    | NA       |
| HSB10kb_145 | 4     | 19482941 | 20179101 | SJC_S000052 | 138194 | 859755 | -  | Sjp_0012440.1 | biological regulation | 0.76396  |
| HSB10kb_145 | 4     | 19482941 | 20179101 | SJC_S000052 | 138194 | 859755 | -  | Sjp_0012450.1 | NA                    | NA       |
| HSB10kb_145 | 4     | 19482941 | 20179101 | SJC_S000052 | 138194 | 859755 | -  | Sjp_0012460.1 | NA                    | NA       |
| HSB10kb_145 | 4     | 19482941 | 20179101 | SJC_S000052 | 138194 | 859755 | -  | Sjp_0012470.1 | NA                    | NA       |
| HSB10kb_145 | 4     | 19482941 | 20179101 | SJC_S000052 | 138194 | 859755 | -  | Sjp_0012480.1 | binding               | 0.052762 |
| HSB10kb_145 | 4     | 19482941 | 20179101 | SJC_S000052 | 138194 | 859755 | -  | Sjp_0012490.1 | NA                    | NA       |
| EBR10kb_102 | "4,4" | NA       | NA       | SJC_S000052 | 859756 | 888831 | NA | Sjp_0012490.1 | NA                    | NA       |
| EBR10kb_102 | "4,4" | NA       | NA       | SJC_S000052 | 859756 | 888831 | NA | Sjp_0012500.1 | NA                    | NA       |
| EBR10kb_102 | "4,4" | NA       | NA       | SJC_S000052 | 859756 | 888831 | NA | Sjp_0012510.1 | NA                    | NA       |
| HSB10kb_146 | 4     | 11458098 | 11490102 | SJC_S000052 | 888832 | 910725 | +  | Sjp_0012510.1 | NA                    | NA       |
| HSB10kb_147 | 5     | 7117889  | 7185293  | SJC_S000053 | 680    | 64202  | +  | Sjp_0012520.1 | NA                    | NA       |
| EBR10kb_103 | "5,5" | NA       | NA       | SJC_S000053 | 64203  | 79880  | NA | Sjp_0012520.1 | NA                    | NA       |
| HSB10kb_148 | 5     | 7092619  | 7112686  | SJC_S000053 | 79881  | 91525  | +  | Sjp_0012520.1 | NA                    | NA       |
| EBR10kb_104 | "5,5" | NA       | NA       | SJC_S000053 | 91526  | 182247 | NA | Sjp_0012520.1 | NA                    | NA       |
| EBR10kb_104 | "5,5" | NA       | NA       | SJC_S000053 | 91526  | 182247 | NA | Sjp_0012530.1 | NA                    | NA       |
| EBR10kb_104 | "5,5" | NA       | NA       | SJC_S000053 | 91526  | 182247 | NA | Sjp_0012540.1 | NA                    | NA       |
| EBR10kb_104 | "5,5" | NA       | NA       | SJC_S000053 | 91526  | 182247 | NA | Sjp_0012550.1 | NA                    | NA       |
| EBR10kb_104 | "5,5" | NA       | NA       | SJC_S000053 | 91526  | 182247 | NA | Sjp_0012560.1 | transporter activity  | 0.782    |
| EBR10kb_104 | "5,5" | NA       | NA       | SJC_S000053 | 91526  | 182247 | NA | Sjp_0012570.1 | transporter activity  | 0.782    |

|             |       |          |          |             |        |        |    |               |                                  |          |
|-------------|-------|----------|----------|-------------|--------|--------|----|---------------|----------------------------------|----------|
| EBR10kb_104 | "5,5" | NA       | NA       | SJC_S000053 | 91526  | 182247 | NA | Sjp_0012580.1 | cell part                        | 0.009037 |
| HSB10kb_149 | 5     | 7191970  | 7257020  | SJC_S000053 | 182248 | 235907 | +  | Sjp_0012580.1 | cell part                        | 0.009037 |
| HSB10kb_149 | 5     | 7191970  | 7257020  | SJC_S000053 | 182248 | 235907 | +  | Sjp_0012590.1 | catalytic activity               | 0.035844 |
| unknown     | NA    | NA       | NA       | SJC_S000054 | NA     | NA     | NA | Sjp_0012600.1 | cellular process                 | 0.63852  |
| unknown     | NA    | NA       | NA       | SJC_S000054 | NA     | NA     | NA | Sjp_0012610.1 | biological regulation            | 0.76396  |
| unknown     | NA    | NA       | NA       | SJC_S000054 | NA     | NA     | NA | Sjp_0012620.1 | biological regulation            | 0.76396  |
| unknown     | NA    | NA       | NA       | SJC_S000054 | NA     | NA     | NA | Sjp_0012630.1 | binding                          | 0.052762 |
| unknown     | NA    | NA       | NA       | SJC_S000054 | NA     | NA     | NA | Sjp_0012640.1 | cell part                        | 0.009037 |
| HSB10kb_150 | WZ    | 22826879 | 23008161 | SJC_S000054 | 142419 | 304001 | -  | Sjp_0012650.1 | cell part                        | 0.009037 |
| HSB10kb_150 | WZ    | 22826879 | 23008161 | SJC_S000054 | 142419 | 304001 | -  | Sjp_0012660.1 | NA                               | NA       |
| HSB10kb_150 | WZ    | 22826879 | 23008161 | SJC_S000054 | 142419 | 304001 | -  | Sjp_0012670.1 | NA                               | NA       |
| HSB10kb_150 | WZ    | 22826879 | 23008161 | SJC_S000054 | 142419 | 304001 | -  | Sjp_0012680.1 | binding                          | 0.052762 |
| unknown     | NA    | NA       | NA       | SJC_S000054 | NA     | NA     | NA | Sjp_0012690.1 | NA                               | NA       |
| unknown     | NA    | NA       | NA       | SJC_S000054 | NA     | NA     | NA | Sjp_0012700.1 | NA                               | NA       |
| unknown     | NA    | NA       | NA       | SJC_S000054 | NA     | NA     | NA | Sjp_0012710.1 | NA                               | NA       |
| unknown     | NA    | NA       | NA       | SJC_S000055 | NA     | NA     | NA | Sjp_0012720.1 | transcription regulator activity | NA       |
| unknown     | NA    | NA       | NA       | SJC_S000055 | NA     | NA     | NA | Sjp_0012730.1 | cell part                        | 0.009037 |
| HSB10kb_151 | 1     | 26555732 | 26588317 | SJC_S000055 | 88343  | 114698 | -  | Sjp_0012740.1 | NA                               | NA       |
| HSB10kb_151 | 1     | 26555732 | 26588317 | SJC_S000055 | 88343  | 114698 | -  | Sjp_0012750.1 | binding                          | 0.052762 |
| unknown     | NA    | NA       | NA       | SJC_S000055 | NA     | NA     | NA | Sjp_0012770.1 | NA                               | NA       |
| unknown     | NA    | NA       | NA       | SJC_S000055 | NA     | NA     | NA | Sjp_0012780.1 | NA                               | NA       |
| unknown     | NA    | NA       | NA       | SJC_S000055 | NA     | NA     | NA | Sjp_0012790.1 | NA                               | NA       |
| unknown     | NA    | NA       | NA       | SJC_S000055 | NA     | NA     | NA | Sjp_0012800.1 | NA                               | NA       |
| unknown     | NA    | NA       | NA       | SJC_S000055 | NA     | NA     | NA | Sjp_0012810.1 | NA                               | NA       |
| unknown     | NA    | NA       | NA       | SJC_S000055 | NA     | NA     | NA | Sjp_0012820.1 | NA                               | NA       |
| unknown     | NA    | NA       | NA       | SJC_S000055 | NA     | NA     | NA | Sjp_0012830.1 | NA                               | NA       |
| unknown     | NA    | NA       | NA       | SJC_S000055 | NA     | NA     | NA | Sjp_0012840.1 | catalytic activity               | 0.035844 |
| unknown     | NA    | NA       | NA       | SJC_S000055 | NA     | NA     | NA | Sjp_0012850.1 | NA                               | NA       |
| unknown     | NA    | NA       | NA       | SJC_S000055 | NA     | NA     | NA | Sjp_0012860.1 | cellular component               | NA       |

|             |       |         |         |             |        |        |    |               |                               |          |
|-------------|-------|---------|---------|-------------|--------|--------|----|---------------|-------------------------------|----------|
|             |       |         |         |             |        |        |    |               | organization or biogenesis    |          |
| unknown     | NA    | NA      | NA      | SJC_S000055 | NA     | NA     | NA | Sjp_0012870.1 | NA                            | NA       |
| unknown     | NA    | NA      | NA      | SJC_S000055 | NA     | NA     | NA | Sjp_0012880.1 | catalytic activity            | 0.035844 |
| unknown     | NA    | NA      | NA      | SJC_S000055 | NA     | NA     | NA | Sjp_0012890.1 | electron carrier activity     | NA       |
| unknown     | NA    | NA      | NA      | SJC_S000055 | NA     | NA     | NA | Sjp_0012900.1 | NA                            | NA       |
| unknown     | NA    | NA      | NA      | SJC_S000055 | NA     | NA     | NA | Sjp_0012910.1 | cell part                     | 0.009037 |
| unknown     | NA    | NA      | NA      | SJC_S000055 | NA     | NA     | NA | Sjp_0012920.1 | NA                            | NA       |
| unknown     | NA    | NA      | NA      | SJC_S000055 | NA     | NA     | NA | Sjp_0012930.1 | NA                            | NA       |
| unknown     | NA    | NA      | NA      | SJC_S000055 | NA     | NA     | NA | Sjp_0012940.1 | NA                            | NA       |
| HSB10kb_152 | 5     | 1295984 | 1447045 | SJC_S000056 | 13085  | 167487 | -  | Sjp_0012950.1 | binding                       | 0.052762 |
| HSB10kb_152 | 5     | 1295984 | 1447045 | SJC_S000056 | 13085  | 167487 | -  | Sjp_0012960.1 | NA                            | NA       |
| HSB10kb_152 | 5     | 1295984 | 1447045 | SJC_S000056 | 13085  | 167487 | -  | Sjp_0012980.1 | NA                            | NA       |
| HSB10kb_152 | 5     | 1295984 | 1447045 | SJC_S000056 | 13085  | 167487 | -  | Sjp_0012990.1 | NA                            | NA       |
| unknown     | NA    | NA      | NA      | SJC_S000056 | NA     | NA     | NA | Sjp_0013000.1 | binding                       | 0.052762 |
| HSB10kb_153 | 7     | 6916500 | 6998020 | SJC_S000057 | 6335   | 100248 | -  | Sjp_0013010.1 | biological regulation         | 0.76396  |
| HSB10kb_153 | 7     | 6916500 | 6998020 | SJC_S000057 | 6335   | 100248 | -  | Sjp_0013020.1 | establishment of localization | NA       |
| HSB10kb_153 | 7     | 6916500 | 6998020 | SJC_S000057 | 6335   | 100248 | -  | Sjp_0013030.1 | NA                            | NA       |
| EBR10kb_105 | "7,7" | NA      | NA      | SJC_S000057 | 100249 | 128764 | NA | Sjp_0013030.1 | NA                            | NA       |
| EBR10kb_105 | "7,7" | NA      | NA      | SJC_S000057 | 100249 | 128764 | NA | Sjp_0013040.1 | NA                            | NA       |
| HSB10kb_154 | 7     | 6867038 | 6912077 | SJC_S000057 | 128765 | 172253 | +  | Sjp_0013040.1 | NA                            | NA       |
| EBR10kb_106 | "7,7" | NA      | NA      | SJC_S000057 | 172254 | 184840 | NA | Sjp_0013050.1 | cell part                     | 0.009037 |
| HSB10kb_155 | 7     | 6318363 | 6807541 | SJC_S000057 | 184841 | 573200 | -  | Sjp_0013050.1 | cell part                     | 0.009037 |
| HSB10kb_155 | 7     | 6318363 | 6807541 | SJC_S000057 | 184841 | 573200 | -  | Sjp_0013060.1 | NA                            | NA       |
| HSB10kb_155 | 7     | 6318363 | 6807541 | SJC_S000057 | 184841 | 573200 | -  | Sjp_0013070.1 | NA                            | NA       |
| HSB10kb_155 | 7     | 6318363 | 6807541 | SJC_S000057 | 184841 | 573200 | -  | Sjp_0013080.1 | NA                            | NA       |
| HSB10kb_155 | 7     | 6318363 | 6807541 | SJC_S000057 | 184841 | 573200 | -  | Sjp_0013090.1 | NA                            | NA       |
| HSB10kb_155 | 7     | 6318363 | 6807541 | SJC_S000057 | 184841 | 573200 | -  | Sjp_0013100.1 | binding                       | 0.052762 |
| HSB10kb_155 | 7     | 6318363 | 6807541 | SJC_S000057 | 184841 | 573200 | -  | Sjp_0013110.1 | NA                            | NA       |
| HSB10kb_155 | 7     | 6318363 | 6807541 | SJC_S000057 | 184841 | 573200 | -  | Sjp_0013120.1 | NA                            | NA       |
| HSB10kb_155 | 7     | 6318363 | 6807541 | SJC_S000057 | 184841 | 573200 | -  | Sjp_0013130.1 | biological                    | 0.76396  |



|             |       |          |          |             |        |        |    |               |                       |          |
|-------------|-------|----------|----------|-------------|--------|--------|----|---------------|-----------------------|----------|
|             |       |          |          |             |        |        |    |               | regulation            |          |
| HSB10kb_155 | 7     | 6318363  | 6807541  | SJC_S000057 | 184841 | 573200 | -  | Sjp_0013140.1 | catalytic activity    | 0.035844 |
| HSB10kb_155 | 7     | 6318363  | 6807541  | SJC_S000057 | 184841 | 573200 | -  | Sjp_0013150.1 | NA                    | NA       |
| HSB10kb_155 | 7     | 6318363  | 6807541  | SJC_S000057 | 184841 | 573200 | -  | Sjp_0013160.1 | binding               | 0.052762 |
| EBR10kb_107 | "7,7" | NA       | NA       | SJC_S000057 | 573201 | 610739 | NA | Sjp_0013160.1 | binding               | 0.052762 |
| EBR10kb_107 | "7,7" | NA       | NA       | SJC_S000057 | 573201 | 610739 | NA | Sjp_0013170.1 | NA                    | NA       |
| HSB10kb_156 | 7     | 3448832  | 3499688  | SJC_S000057 | 610740 | 625459 | -  | Sjp_0013170.1 | NA                    | NA       |
| HSB10kb_156 | 7     | 3448832  | 3499688  | SJC_S000057 | 610740 | 625459 | -  | Sjp_0013180.1 | NA                    | NA       |
| HSB10kb_157 | 4     | 19195512 | 19389161 | SJC_S000058 | 24972  | 227941 | +  | Sjp_0013200.1 | NA                    | NA       |
| HSB10kb_157 | 4     | 19195512 | 19389161 | SJC_S000058 | 24972  | 227941 | +  | Sjp_0013210.1 | catalytic activity    | 0.035844 |
| HSB10kb_157 | 4     | 19195512 | 19389161 | SJC_S000058 | 24972  | 227941 | +  | Sjp_0013220.1 | NA                    | NA       |
| HSB10kb_157 | 4     | 19195512 | 19389161 | SJC_S000058 | 24972  | 227941 | +  | Sjp_0013230.1 | NA                    | NA       |
| HSB10kb_157 | 4     | 19195512 | 19389161 | SJC_S000058 | 24972  | 227941 | +  | Sjp_0013240.1 | NA                    | NA       |
| HSB10kb_157 | 4     | 19195512 | 19389161 | SJC_S000058 | 24972  | 227941 | +  | Sjp_0013250.1 | NA                    | NA       |
| HSB10kb_157 | 4     | 19195512 | 19389161 | SJC_S000058 | 24972  | 227941 | +  | Sjp_0013260.1 | catalytic activity    | 0.035844 |
| HSB10kb_157 | 4     | 19195512 | 19389161 | SJC_S000058 | 24972  | 227941 | +  | Sjp_0013270.1 | NA                    | NA       |
| HSB10kb_157 | 4     | 19195512 | 19389161 | SJC_S000058 | 24972  | 227941 | +  | Sjp_0013280.1 | binding               | 0.052762 |
| EBR10kb_108 | "4,4" | NA       | NA       | SJC_S000058 | 227942 | 238636 | NA | Sjp_0013280.1 | binding               | 0.052762 |
| HSB10kb_158 | 4     | 19022353 | 19160907 | SJC_S000058 | 238637 | 366095 | -  | Sjp_0013290.1 | binding               | 0.052762 |
| HSB10kb_158 | 4     | 19022353 | 19160907 | SJC_S000058 | 238637 | 366095 | -  | Sjp_0013300.1 | NA                    | NA       |
| HSB10kb_158 | 4     | 19022353 | 19160907 | SJC_S000058 | 238637 | 366095 | -  | Sjp_0013310.1 | NA                    | NA       |
| HSB10kb_158 | 4     | 19022353 | 19160907 | SJC_S000058 | 238637 | 366095 | -  | Sjp_0013320.1 | NA                    | NA       |
| HSB10kb_158 | 4     | 19022353 | 19160907 | SJC_S000058 | 238637 | 366095 | -  | Sjp_0013330.1 | NA                    | NA       |
| EBR10kb_109 | "4,4" | NA       | NA       | SJC_S000058 | 366096 | 455175 | NA | Sjp_0013340.1 | catalytic activity    | 0.035844 |
| EBR10kb_109 | "4,4" | NA       | NA       | SJC_S000058 | 366096 | 455175 | NA | Sjp_0013350.1 | catalytic activity    | 0.035844 |
| EBR10kb_109 | "4,4" | NA       | NA       | SJC_S000058 | 366096 | 455175 | NA | Sjp_0013360.1 | catalytic activity    | 0.035844 |
| EBR10kb_109 | "4,4" | NA       | NA       | SJC_S000058 | 366096 | 455175 | NA | Sjp_0013370.1 | cell part             | 0.009037 |
| HSB10kb_159 | 4     | 10091901 | 10487286 | SJC_S000058 | 455176 | 758826 | +  | Sjp_0013370.1 | cell part             | 0.009037 |
| HSB10kb_159 | 4     | 10091901 | 10487286 | SJC_S000058 | 455176 | 758826 | +  | Sjp_0013380.1 | biological regulation | 0.76396  |
| HSB10kb_159 | 4     | 10091901 | 10487286 | SJC_S000058 | 455176 | 758826 | +  | Sjp_0013390.1 | NA                    | NA       |
| HSB10kb_159 | 4     | 10091901 | 10487286 | SJC_S000058 | 455176 | 758826 | +  | Sjp_0013400.1 | catalytic activity    | 0.035844 |
| HSB10kb_159 | 4     | 10091901 | 10487286 | SJC_S000058 | 455176 | 758826 | +  | Sjp_0013410.1 | NA                    | NA       |
| HSB10kb_159 | 4     | 10091901 | 10487286 | SJC_S000058 | 455176 | 758826 | +  | Sjp_0013420.1 | NA                    | NA       |

|             |    |          |          |             |        |        |    |               |                       |          |
|-------------|----|----------|----------|-------------|--------|--------|----|---------------|-----------------------|----------|
| HSB10kb_159 | 4  | 10091901 | 10487286 | SJC_S000058 | 455176 | 758826 | +  | Sjp_0013430.1 | catalytic activity    | 0.035844 |
| HSB10kb_159 | 4  | 10091901 | 10487286 | SJC_S000058 | 455176 | 758826 | +  | Sjp_0013440.1 | transporter activity  | 0.782    |
| HSB10kb_159 | 4  | 10091901 | 10487286 | SJC_S000058 | 455176 | 758826 | +  | Sjp_0013450.1 | NA                    | NA       |
| HSB10kb_159 | 4  | 10091901 | 10487286 | SJC_S000058 | 455176 | 758826 | +  | Sjp_0013460.1 | NA                    | NA       |
| HSB10kb_159 | 4  | 10091901 | 10487286 | SJC_S000058 | 455176 | 758826 | +  | Sjp_0013470.1 | NA                    | NA       |
| HSB10kb_159 | 4  | 10091901 | 10487286 | SJC_S000058 | 455176 | 758826 | +  | Sjp_0013480.1 | catalytic activity    | 0.035844 |
| unknown     | NA | NA       | NA       | SJC_S000059 | NA     | NA     | NA | Sjp_0013490.1 | response to stimulus  | NA       |
| unknown     | NA | NA       | NA       | SJC_S000059 | NA     | NA     | NA | Sjp_0013500.1 | NA                    | NA       |
| unknown     | NA | NA       | NA       | SJC_S000059 | NA     | NA     | NA | Sjp_0013510.1 | response to stimulus  | NA       |
| unknown     | NA | NA       | NA       | SJC_S000059 | NA     | NA     | NA | Sjp_0013520.1 | catalytic activity    | 0.035844 |
| unknown     | NA | NA       | NA       | SJC_S000059 | NA     | NA     | NA | Sjp_0013530.1 | catalytic activity    | 0.035844 |
| unknown     | NA | NA       | NA       | SJC_S000059 | NA     | NA     | NA | Sjp_0013540.1 | cell part             | 0.009037 |
| unknown     | NA | NA       | NA       | SJC_S000059 | NA     | NA     | NA | Sjp_0013550.1 | NA                    | NA       |
| unknown     | NA | NA       | NA       | SJC_S000059 | NA     | NA     | NA | Sjp_0013560.1 | transporter activity  | 0.782    |
| unknown     | NA | NA       | NA       | SJC_S000059 | NA     | NA     | NA | Sjp_0013570.1 | transporter activity  | 0.782    |
| unknown     | NA | NA       | NA       | SJC_S000059 | NA     | NA     | NA | Sjp_0013580.1 | NA                    | NA       |
| unknown     | NA | NA       | NA       | SJC_S000059 | NA     | NA     | NA | Sjp_0013590.1 | binding               | 0.052762 |
| unknown     | NA | NA       | NA       | SJC_S000059 | NA     | NA     | NA | Sjp_0013600.1 | binding               | 0.052762 |
| unknown     | NA | NA       | NA       | SJC_S000059 | NA     | NA     | NA | Sjp_0013610.1 | catalytic activity    | 0.035844 |
| unknown     | NA | NA       | NA       | SJC_S000059 | NA     | NA     | NA | Sjp_0013630.1 | NA                    | NA       |
| unknown     | NA | NA       | NA       | SJC_S000059 | NA     | NA     | NA | Sjp_0013640.1 | binding               | 0.052762 |
| unknown     | NA | NA       | NA       | SJC_S000059 | NA     | NA     | NA | Sjp_0013650.1 | NA                    | NA       |
| unknown     | NA | NA       | NA       | SJC_S000059 | NA     | NA     | NA | Sjp_0013660.1 | NA                    | NA       |
| unknown     | NA | NA       | NA       | SJC_S000059 | NA     | NA     | NA | Sjp_0013670.1 | NA                    | NA       |
| unknown     | NA | NA       | NA       | SJC_S000059 | NA     | NA     | NA | Sjp_0013680.1 | NA                    | NA       |
| unknown     | NA | NA       | NA       | SJC_S000059 | NA     | NA     | NA | Sjp_0013690.1 | biological regulation | 0.76396  |
| unknown     | NA | NA       | NA       | SJC_S000059 | NA     | NA     | NA | Sjp_0013700.1 | transporter activity  | 0.782    |

|             |         |          |          |             |        |        |    |               |                                               |          |
|-------------|---------|----------|----------|-------------|--------|--------|----|---------------|-----------------------------------------------|----------|
| unknown     | NA      | NA       | NA       | SJC_S000059 | NA     | NA     | NA | Sjp_0013710.1 | NA                                            | NA       |
| unknown     | NA      | NA       | NA       | SJC_S000059 | NA     | NA     | NA | Sjp_0013720.1 | NA                                            | NA       |
| unknown     | NA      | NA       | NA       | SJC_S000059 | NA     | NA     | NA | Sjp_0013730.1 | enzyme regulator activity                     | 0.1755   |
| unknown     | NA      | NA       | NA       | SJC_S000059 | NA     | NA     | NA | Sjp_0013740.1 | NA                                            | NA       |
| unknown     | NA      | NA       | NA       | SJC_S000059 | NA     | NA     | NA | Sjp_0013750.1 | NA                                            | NA       |
| unknown     | NA      | NA       | NA       | SJC_S000059 | NA     | NA     | NA | Sjp_0013760.1 | catalytic activity                            | 0.035844 |
| unknown     | NA      | NA       | NA       | SJC_S000059 | NA     | NA     | NA | Sjp_0013770.1 | NA                                            | NA       |
| unknown     | NA      | NA       | NA       | SJC_S000059 | NA     | NA     | NA | Sjp_0013780.1 | NA                                            | NA       |
| unknown     | NA      | NA       | NA       | SJC_S000059 | NA     | NA     | NA | Sjp_0013790.1 | NA                                            | NA       |
| unknown     | NA      | NA       | NA       | SJC_S000059 | NA     | NA     | NA | Sjp_0013800.1 | establishment of localization                 | NA       |
| unknown     | NA      | NA       | NA       | SJC_S000059 | NA     | NA     | NA | Sjp_0013810.1 | cellular component organization or biogenesis | NA       |
| unknown     | NA      | NA       | NA       | SJC_S000060 | NA     | NA     | NA | Sjp_0013820.1 | NA                                            | NA       |
| HSB10kb_160 | WZ      | 35790425 | 35855152 | SJC_S000060 | 127078 | 147443 | -  | Sjp_0013830.1 | cell part                                     | 0.009037 |
| EBR10kb_110 | "WZ,WZ" | NA       | NA       | SJC_S000060 | 147444 | 167570 | NA | Sjp_0013840.1 | NA                                            | NA       |
| HSB10kb_161 | WZ      | 35860057 | 35912732 | SJC_S000060 | 167571 | 202004 | +  | Sjp_0013840.1 | NA                                            | NA       |
| HSB10kb_161 | WZ      | 35860057 | 35912732 | SJC_S000060 | 167571 | 202004 | +  | Sjp_0013850.1 | cellular process                              | 0.63852  |
| HSB10kb_161 | WZ      | 35860057 | 35912732 | SJC_S000060 | 167571 | 202004 | +  | Sjp_0013860.1 | transcription regulator activity              | NA       |
| EBR10kb_111 | "WZ,WZ" | NA       | NA       | SJC_S000060 | 202005 | 228418 | NA | Sjp_0013870.1 | NA                                            | NA       |
| EBR10kb_111 | "WZ,WZ" | NA       | NA       | SJC_S000060 | 202005 | 228418 | NA | Sjp_0013880.1 | NA                                            | NA       |
| HSB10kb_162 | WZ      | 36227128 | 36257930 | SJC_S000060 | 228419 | 264718 | -  | Sjp_0013880.1 | NA                                            | NA       |
| EBR10kb_112 | "WZ,4"  | NA       | NA       | SJC_S000060 | 264719 | 306696 | NA | Sjp_0013880.1 | NA                                            | NA       |
| EBR10kb_112 | "WZ,4"  | NA       | NA       | SJC_S000060 | 264719 | 306696 | NA | Sjp_0013890.1 | biological regulation                         | 0.76396  |
| HSB10kb_163 | 4       | 13347779 | 13469314 | SJC_S000060 | 306697 | 415003 | +  | Sjp_0013890.1 | biological regulation                         | 0.76396  |
| HSB10kb_163 | 4       | 13347779 | 13469314 | SJC_S000060 | 306697 | 415003 | +  | Sjp_0013900.1 | NA                                            | NA       |
| HSB10kb_163 | 4       | 13347779 | 13469314 | SJC_S000060 | 306697 | 415003 | +  | Sjp_0013910.1 | NA                                            | NA       |

|             |       |          |          |             |        |        |    |               |                                    |          |
|-------------|-------|----------|----------|-------------|--------|--------|----|---------------|------------------------------------|----------|
| HSB10kb_163 | 4     | 13347779 | 13469314 | SJC_S000060 | 306697 | 415003 | +  | Sjp_0013920.1 | NA                                 | NA       |
| unknown     | NA    | NA       | NA       | SJC_S000060 | NA     | NA     | NA | Sjp_0013930.1 | NA                                 | NA       |
| unknown     | NA    | NA       | NA       | SJC_S000060 | NA     | NA     | NA | Sjp_0013940.1 | NA                                 | NA       |
| HSB10kb_164 | 4     | 26382882 | 26418876 | SJC_S000061 | 100    | 65863  |    | NA            | NA                                 | NA       |
| EBR10kb_113 | "4,4" | NA       | NA       | SJC_S000061 | 65864  | 155719 | NA | Sjp_0013960.1 | NA                                 | NA       |
| EBR10kb_113 | "4,4" | NA       | NA       | SJC_S000061 | 65864  | 155719 | NA | Sjp_0013970.1 | NA                                 | NA       |
| EBR10kb_113 | "4,4" | NA       | NA       | SJC_S000061 | 65864  | 155719 | NA | Sjp_0013980.1 | NA                                 | NA       |
| HSB10kb_165 | 4     | 26814964 | 26937964 | SJC_S000061 | 155720 | 375347 | -  | Sjp_0013980.1 | NA                                 | NA       |
| HSB10kb_165 | 4     | 26814964 | 26937964 | SJC_S000061 | 155720 | 375347 | -  | Sjp_0013990.1 | NA                                 | NA       |
| HSB10kb_165 | 4     | 26814964 | 26937964 | SJC_S000061 | 155720 | 375347 | -  | Sjp_0014000.1 | binding                            | 0.052762 |
| HSB10kb_165 | 4     | 26814964 | 26937964 | SJC_S000061 | 155720 | 375347 | -  | Sjp_0014010.1 | NA                                 | NA       |
| HSB10kb_165 | 4     | 26814964 | 26937964 | SJC_S000061 | 155720 | 375347 | -  | Sjp_0014020.1 | NA                                 | NA       |
| HSB10kb_165 | 4     | 26814964 | 26937964 | SJC_S000061 | 155720 | 375347 | -  | Sjp_0014030.1 | NA                                 | NA       |
| HSB10kb_165 | 4     | 26814964 | 26937964 | SJC_S000061 | 155720 | 375347 | -  | Sjp_0014040.1 | transporter activity               | 0.782    |
| EBR10kb_114 | "4,2" | NA       | NA       | SJC_S000061 | 375348 | 391702 | NA | Sjp_0014040.1 | transporter activity               | 0.782    |
| EBR10kb_114 | "4,2" | NA       | NA       | SJC_S000061 | 375348 | 391702 | NA | Sjp_0014050.1 | NA                                 | NA       |
| HSB10kb_166 | 2     | 25576754 | 25859764 | SJC_S000061 | 391703 | 699482 | +  | Sjp_0014050.1 | NA                                 | NA       |
| HSB10kb_166 | 2     | 25576754 | 25859764 | SJC_S000061 | 391703 | 699482 | +  | Sjp_0014060.1 | cell part                          | 0.009037 |
| HSB10kb_166 | 2     | 25576754 | 25859764 | SJC_S000061 | 391703 | 699482 | +  | Sjp_0014070.1 | NA                                 | NA       |
| HSB10kb_166 | 2     | 25576754 | 25859764 | SJC_S000061 | 391703 | 699482 | +  | Sjp_0014080.1 | NA                                 | NA       |
| HSB10kb_166 | 2     | 25576754 | 25859764 | SJC_S000061 | 391703 | 699482 | +  | Sjp_0014090.1 | NA                                 | NA       |
| HSB10kb_166 | 2     | 25576754 | 25859764 | SJC_S000061 | 391703 | 699482 | +  | Sjp_0014100.1 | NA                                 | NA       |
| HSB10kb_166 | 2     | 25576754 | 25859764 | SJC_S000061 | 391703 | 699482 | +  | Sjp_0014110.1 | NA                                 | NA       |
| HSB10kb_166 | 2     | 25576754 | 25859764 | SJC_S000061 | 391703 | 699482 | +  | Sjp_0014120.1 | growth                             | NA       |
| HSB10kb_166 | 2     | 25576754 | 25859764 | SJC_S000061 | 391703 | 699482 | +  | Sjp_0014130.1 | NA                                 | NA       |
| HSB10kb_166 | 2     | 25576754 | 25859764 | SJC_S000061 | 391703 | 699482 | +  | Sjp_0014140.1 | NA                                 | NA       |
| HSB10kb_166 | 2     | 25576754 | 25859764 | SJC_S000061 | 391703 | 699482 | +  | Sjp_0014150.1 | NA                                 | NA       |
| HSB10kb_166 | 2     | 25576754 | 25859764 | SJC_S000061 | 391703 | 699482 | +  | Sjp_0014160.1 | transporter activity               | 0.782    |
| unknown     | NA    | NA       | NA       | SJC_S000061 | NA     | NA     | NA | Sjp_0014170.1 | cellular component organization or | NA       |

|             |       |         |         |             |        |        |    |               |                        |          |
|-------------|-------|---------|---------|-------------|--------|--------|----|---------------|------------------------|----------|
|             |       |         |         |             |        |        |    |               | biogenesis             |          |
| unknown     | NA    | NA      | NA      | SJC_S000062 | NA     | NA     | NA | Sjp_0014180.1 | NA                     | NA       |
| unknown     | NA    | NA      | NA      | SJC_S000062 | NA     | NA     | NA | Sjp_0014190.1 | NA                     | NA       |
| unknown     | NA    | NA      | NA      | SJC_S000062 | NA     | NA     | NA | Sjp_0014200.1 | NA                     | NA       |
| HSB10kb_167 | 7     | 6070945 | 6159747 | SJC_S000062 | 270457 | 336894 | -  | Sjp_0014210.1 | multi-organism process | NA       |
| HSB10kb_167 | 7     | 6070945 | 6159747 | SJC_S000062 | 270457 | 336894 | -  | Sjp_0014220.1 | NA                     | NA       |
| HSB10kb_167 | 7     | 6070945 | 6159747 | SJC_S000062 | 270457 | 336894 | -  | Sjp_0014230.1 | NA                     | NA       |
| EBR10kb_115 | "7,7" | NA      | NA      | SJC_S000062 | 336895 | 437392 | NA | Sjp_0014240.1 | NA                     | NA       |
| EBR10kb_115 | "7,7" | NA      | NA      | SJC_S000062 | 336895 | 437392 | NA | Sjp_0014250.1 | NA                     | NA       |
| EBR10kb_115 | "7,7" | NA      | NA      | SJC_S000062 | 336895 | 437392 | NA | Sjp_0014260.1 | transporter activity   | 0.782    |
| HSB10kb_168 | 7     | 1624887 | 1763955 | SJC_S000062 | 437393 | 592053 | +  | Sjp_0014260.1 | transporter activity   | 0.782    |
| HSB10kb_168 | 7     | 1624887 | 1763955 | SJC_S000062 | 437393 | 592053 | +  | Sjp_0014280.1 | binding                | 0.052762 |
| HSB10kb_168 | 7     | 1624887 | 1763955 | SJC_S000062 | 437393 | 592053 | +  | Sjp_0014290.1 | binding                | 0.052762 |
| HSB10kb_168 | 7     | 1624887 | 1763955 | SJC_S000062 | 437393 | 592053 | +  | Sjp_0014300.1 | NA                     | NA       |
| unknown     | NA    | NA      | NA      | SJC_S000063 | NA     | NA     | NA | Sjp_0014320.1 | NA                     | NA       |
| unknown     | NA    | NA      | NA      | SJC_S000063 | NA     | NA     | NA | Sjp_0014330.1 | NA                     | NA       |
| unknown     | NA    | NA      | NA      | SJC_S000063 | NA     | NA     | NA | Sjp_0014350.1 | binding                | 0.052762 |
| unknown     | NA    | NA      | NA      | SJC_S000063 | NA     | NA     | NA | Sjp_0014360.1 | NA                     | NA       |
| unknown     | NA    | NA      | NA      | SJC_S000063 | NA     | NA     | NA | Sjp_0014370.1 | catalytic activity     | 0.035844 |
| unknown     | NA    | NA      | NA      | SJC_S000063 | NA     | NA     | NA | Sjp_0014380.1 | NA                     | NA       |
| unknown     | NA    | NA      | NA      | SJC_S000063 | NA     | NA     | NA | Sjp_0014390.1 | NA                     | NA       |
| unknown     | NA    | NA      | NA      | SJC_S000063 | NA     | NA     | NA | Sjp_0014400.1 | NA                     | NA       |
| unknown     | NA    | NA      | NA      | SJC_S000063 | NA     | NA     | NA | Sjp_0014410.1 | NA                     | NA       |
| unknown     | NA    | NA      | NA      | SJC_S000063 | NA     | NA     | NA | Sjp_0014420.1 | NA                     | NA       |
| unknown     | NA    | NA      | NA      | SJC_S000063 | NA     | NA     | NA | Sjp_0014430.1 | NA                     | NA       |
| HSB10kb_169 | WZ    | 2285753 | 2700096 | SJC_S000064 | 4978   | 412870 | +  | Sjp_0014440.1 | NA                     | NA       |
| HSB10kb_169 | WZ    | 2285753 | 2700096 | SJC_S000064 | 4978   | 412870 | +  | Sjp_0014450.1 | catalytic activity     | 0.035844 |
| HSB10kb_169 | WZ    | 2285753 | 2700096 | SJC_S000064 | 4978   | 412870 | +  | Sjp_0014460.1 | NA                     | NA       |
| HSB10kb_169 | WZ    | 2285753 | 2700096 | SJC_S000064 | 4978   | 412870 | +  | Sjp_0014470.1 | catalytic activity     | 0.035844 |
| HSB10kb_169 | WZ    | 2285753 | 2700096 | SJC_S000064 | 4978   | 412870 | +  | Sjp_0014490.1 | NA                     | NA       |
| HSB10kb_169 | WZ    | 2285753 | 2700096 | SJC_S000064 | 4978   | 412870 | +  | Sjp_0014500.1 | binding                | 0.052762 |

|             |       |          |          |             |        |        |    |               |                           |          |
|-------------|-------|----------|----------|-------------|--------|--------|----|---------------|---------------------------|----------|
| HSB10kb_169 | WZ    | 2285753  | 2700096  | SJC_S000064 | 4978   | 412870 | +  | Sjp_0014510.1 | binding                   | 0.052762 |
| HSB10kb_169 | WZ    | 2285753  | 2700096  | SJC_S000064 | 4978   | 412870 | +  | Sjp_0014520.1 | binding                   | 0.052762 |
| HSB10kb_169 | WZ    | 2285753  | 2700096  | SJC_S000064 | 4978   | 412870 | +  | Sjp_0014530.1 | NA                        | NA       |
| HSB10kb_169 | WZ    | 2285753  | 2700096  | SJC_S000064 | 4978   | 412870 | +  | Sjp_0014540.1 | cellular process          | 0.63852  |
| HSB10kb_169 | WZ    | 2285753  | 2700096  | SJC_S000064 | 4978   | 412870 | +  | Sjp_0014550.1 | NA                        | NA       |
| HSB10kb_169 | WZ    | 2285753  | 2700096  | SJC_S000064 | 4978   | 412870 | +  | Sjp_0014560.1 | enzyme regulator activity | 0.1755   |
| HSB10kb_169 | WZ    | 2285753  | 2700096  | SJC_S000064 | 4978   | 412870 | +  | Sjp_0014570.1 | NA                        | NA       |
| HSB10kb_169 | WZ    | 2285753  | 2700096  | SJC_S000064 | 4978   | 412870 | +  | Sjp_0014580.1 | metabolic process         | 0.41934  |
| HSB10kb_169 | WZ    | 2285753  | 2700096  | SJC_S000064 | 4978   | 412870 | +  | Sjp_0014590.1 | catalytic activity        | 0.035844 |
| HSB10kb_169 | WZ    | 2285753  | 2700096  | SJC_S000064 | 4978   | 412870 | +  | Sjp_0014600.1 | NA                        | NA       |
| HSB10kb_169 | WZ    | 2285753  | 2700096  | SJC_S000064 | 4978   | 412870 | +  | Sjp_0014610.1 | binding                   | 0.052762 |
| unknown     | NA    | NA       | NA       | SJC_S000064 | NA     | NA     | NA | Sjp_0014620.1 | catalytic activity        | 0.035844 |
| HSB10kb_170 | 1     | 59288767 | 59322344 | SJC_S000065 | 1506   | 68295  | +  | Sjp_0014630.1 | NA                        | NA       |
| HSB10kb_170 | 1     | 59288767 | 59322344 | SJC_S000065 | 1506   | 68295  | +  | Sjp_0014640.1 | NA                        | NA       |
| HSB10kb_170 | 1     | 59288767 | 59322344 | SJC_S000065 | 1506   | 68295  | +  | Sjp_0014650.1 | NA                        | NA       |
| EBR10kb_116 | "1,1" | NA       | NA       | SJC_S000065 | 68296  | 71556  | NA | Sjp_0014660.1 | NA                        | NA       |
| HSB10kb_171 | 1     | 59254058 | 59267799 | SJC_S000065 | 71557  | 83215  | -  | Sjp_0014660.1 | NA                        | NA       |
| HSB10kb_171 | 1     | 59254058 | 59267799 | SJC_S000065 | 71557  | 83215  | -  | Sjp_0014670.1 | NA                        | NA       |
| EBR10kb_117 | "1,1" | NA       | NA       | SJC_S000065 | 83216  | 89507  | NA | Sjp_0014680.1 | NA                        | NA       |
| HSB10kb_172 | 1     | 59325175 | 59539730 | SJC_S000065 | 89508  | 300747 | +  | Sjp_0014680.1 | NA                        | NA       |
| HSB10kb_172 | 1     | 59325175 | 59539730 | SJC_S000065 | 89508  | 300747 | +  | Sjp_0014690.1 | NA                        | NA       |
| HSB10kb_172 | 1     | 59325175 | 59539730 | SJC_S000065 | 89508  | 300747 | +  | Sjp_0014700.1 | NA                        | NA       |
| HSB10kb_172 | 1     | 59325175 | 59539730 | SJC_S000065 | 89508  | 300747 | +  | Sjp_0014710.1 | enzyme regulator activity | 0.1755   |
| HSB10kb_172 | 1     | 59325175 | 59539730 | SJC_S000065 | 89508  | 300747 | +  | Sjp_0014720.1 | cellular process          | 0.63852  |
| HSB10kb_172 | 1     | 59325175 | 59539730 | SJC_S000065 | 89508  | 300747 | +  | Sjp_0014730.1 | NA                        | NA       |
| EBR10kb_118 | "1,1" | NA       | NA       | SJC_S000065 | 300748 | 306587 | NA | Sjp_0014730.1 | NA                        | NA       |
| HSB10kb_173 | 1     | 59562607 | 59599743 | SJC_S000065 | 306588 | 328603 | -  | Sjp_0014730.1 | NA                        | NA       |
| EBR10kb_119 | "1,1" | NA       | NA       | SJC_S000065 | 328604 | 358553 | NA | NA            | NA                        | NA       |
| HSB10kb_174 | 1     | 59604993 | 59683458 | SJC_S000065 | 358554 | 467975 | +  | Sjp_0014740.1 | NA                        | NA       |

|             |       |          |          |             |        |        |    |               |                           |          |
|-------------|-------|----------|----------|-------------|--------|--------|----|---------------|---------------------------|----------|
| HSB10kb_174 | 1     | 59604993 | 59683458 | SJC_S000065 | 358554 | 467975 | +  | Sjp_0014750.1 | NA                        | NA       |
| unknown     | NA    | NA       | NA       | SJC_S000065 | NA     | NA     | NA | Sjp_0014760.1 | NA                        | NA       |
| unknown     | NA    | NA       | NA       | SJC_S000065 | NA     | NA     | NA | Sjp_0014770.1 | NA                        | NA       |
| unknown     | NA    | NA       | NA       | SJC_S000066 | NA     | NA     | NA | Sjp_0014780.1 | binding                   | 0.052762 |
| unknown     | NA    | NA       | NA       | SJC_S000066 | NA     | NA     | NA | Sjp_0014790.1 | binding                   | 0.052762 |
| unknown     | NA    | NA       | NA       | SJC_S000066 | NA     | NA     | NA | Sjp_0014800.1 | binding                   | 0.052762 |
| unknown     | NA    | NA       | NA       | SJC_S000066 | NA     | NA     | NA | Sjp_0014810.1 | NA                        | NA       |
| unknown     | NA    | NA       | NA       | SJC_S000066 | NA     | NA     | NA | Sjp_0014820.1 | NA                        | NA       |
| unknown     | NA    | NA       | NA       | SJC_S000066 | NA     | NA     | NA | Sjp_0014830.1 | NA                        | NA       |
| unknown     | NA    | NA       | NA       | SJC_S000066 | NA     | NA     | NA | Sjp_0014840.1 | NA                        | NA       |
| unknown     | NA    | NA       | NA       | SJC_S000066 | NA     | NA     | NA | Sjp_0014850.1 | NA                        | NA       |
| unknown     | NA    | NA       | NA       | SJC_S000066 | NA     | NA     | NA | Sjp_0014870.1 | NA                        | NA       |
| unknown     | NA    | NA       | NA       | SJC_S000066 | NA     | NA     | NA | Sjp_0014880.1 | NA                        | NA       |
| unknown     | NA    | NA       | NA       | SJC_S000066 | NA     | NA     | NA | Sjp_0014890.1 | NA                        | NA       |
| unknown     | NA    | NA       | NA       | SJC_S000066 | NA     | NA     | NA | Sjp_0014900.1 | NA                        | NA       |
| unknown     | NA    | NA       | NA       | SJC_S000066 | NA     | NA     | NA | Sjp_0014910.1 | NA                        | NA       |
| unknown     | NA    | NA       | NA       | SJC_S000066 | NA     | NA     | NA | Sjp_0014920.1 | NA                        | NA       |
| HSB10kb_175 | 6     | 11357717 | 11647955 | SJC_S000068 | 3736   | 162962 | +  | Sjp_0014930.1 | NA                        | NA       |
| HSB10kb_175 | 6     | 11357717 | 11647955 | SJC_S000068 | 3736   | 162962 | +  | Sjp_0014940.1 | electron carrier activity | NA       |
| EBR10kb_120 | "6,6" | NA       | NA       | SJC_S000068 | 162963 | 233614 | NA | Sjp_0014950.1 | NA                        | NA       |
| EBR10kb_120 | "6,6" | NA       | NA       | SJC_S000068 | 162963 | 233614 | NA | Sjp_0014960.1 | NA                        | NA       |
| EBR10kb_120 | "6,6" | NA       | NA       | SJC_S000068 | 162963 | 233614 | NA | Sjp_0014970.1 | NA                        | NA       |
| HSB10kb_176 | 6     | 11745425 | 11791754 | SJC_S000068 | 233615 | 295518 | -  | Sjp_0014970.1 | NA                        | NA       |
| HSB10kb_176 | 6     | 11745425 | 11791754 | SJC_S000068 | 233615 | 295518 | -  | Sjp_0014980.1 | NA                        | NA       |
| unknown     | NA    | NA       | NA       | SJC_S000068 | NA     | NA     | NA | Sjp_0014990.1 | binding                   | 0.052762 |
| unknown     | NA    | NA       | NA       | SJC_S000068 | NA     | NA     | NA | Sjp_0015000.1 | binding                   | 0.052762 |
| unknown     | NA    | NA       | NA       | SJC_S000068 | NA     | NA     | NA | Sjp_0015010.1 | NA                        | NA       |
| unknown     | NA    | NA       | NA       | SJC_S000069 | NA     | NA     | NA | Sjp_0015020.1 | catalytic activity        | 0.035844 |
| unknown     | NA    | NA       | NA       | SJC_S000069 | NA     | NA     | NA | Sjp_0015030.1 | cell part                 | 0.009037 |
| unknown     | NA    | NA       | NA       | SJC_S000069 | NA     | NA     | NA | Sjp_0015040.1 | NA                        | NA       |
| unknown     | NA    | NA       | NA       | SJC_S000069 | NA     | NA     | NA | Sjp_0015050.1 | binding                   | 0.052762 |
| unknown     | NA    | NA       | NA       | SJC_S000069 | NA     | NA     | NA | Sjp_0015060.1 | NA                        | NA       |
| unknown     | NA    | NA       | NA       | SJC_S000069 | NA     | NA     | NA | Sjp_0015070.1 | NA                        | NA       |

|             |         |          |          |             |        |        |    |               |                           |          |
|-------------|---------|----------|----------|-------------|--------|--------|----|---------------|---------------------------|----------|
| unknown     | NA      | NA       | NA       | SJC_S000069 | NA     | NA     | NA | Sjp_0015080.1 | NA                        | NA       |
| HSB10kb_177 | 4       | 26303874 | 26316750 | SJC_S000069 | 204241 | 220113 | +  | Sjp_0015090.1 | catalytic activity        | 0.035844 |
| HSB10kb_177 | 4       | 26303874 | 26316750 | SJC_S000069 | 204241 | 220113 | +  | Sjp_0015100.1 | binding                   | 0.052762 |
| EBR10kb_121 | "4,4"   | NA       | NA       | SJC_S000069 | 220114 | 340900 | NA | Sjp_0015110.1 | NA                        | NA       |
| EBR10kb_121 | "4,4"   | NA       | NA       | SJC_S000069 | 220114 | 340900 | NA | Sjp_0015120.1 | transporter activity      | 0.782    |
| EBR10kb_121 | "4,4"   | NA       | NA       | SJC_S000069 | 220114 | 340900 | NA | Sjp_0015130.1 | NA                        | NA       |
| EBR10kb_121 | "4,4"   | NA       | NA       | SJC_S000069 | 220114 | 340900 | NA | Sjp_0015140.1 | NA                        | NA       |
| EBR10kb_121 | "4,4"   | NA       | NA       | SJC_S000069 | 220114 | 340900 | NA | Sjp_0015150.1 | developmental process     | NA       |
| HSB10kb_178 | 4       | 25834391 | 26076875 | SJC_S000069 | 340901 | 540344 | -  | Sjp_0015150.1 | developmental process     | NA       |
| HSB10kb_178 | 4       | 25834391 | 26076875 | SJC_S000069 | 340901 | 540344 | -  | Sjp_0015160.1 | NA                        | NA       |
| HSB10kb_178 | 4       | 25834391 | 26076875 | SJC_S000069 | 340901 | 540344 | -  | Sjp_0015170.1 | biological regulation     | 0.76396  |
| HSB10kb_178 | 4       | 25834391 | 26076875 | SJC_S000069 | 340901 | 540344 | -  | Sjp_0015180.1 | NA                        | NA       |
| HSB10kb_178 | 4       | 25834391 | 26076875 | SJC_S000069 | 340901 | 540344 | -  | Sjp_0015190.1 | binding                   | 0.052762 |
| HSB10kb_178 | 4       | 25834391 | 26076875 | SJC_S000069 | 340901 | 540344 | -  | Sjp_0015200.1 | NA                        | NA       |
| HSB10kb_178 | 4       | 25834391 | 26076875 | SJC_S000069 | 340901 | 540344 | -  | Sjp_0015210.1 | NA                        | NA       |
| HSB10kb_178 | 4       | 25834391 | 26076875 | SJC_S000069 | 340901 | 540344 | -  | Sjp_0015220.1 | NA                        | NA       |
| HSB10kb_178 | 4       | 25834391 | 26076875 | SJC_S000069 | 340901 | 540344 | -  | Sjp_0015230.1 | binding                   | 0.052762 |
| unknown     | NA      | NA       | NA       | SJC_S000070 | NA     | NA     | NA | Sjp_0015240.1 | NA                        | NA       |
| unknown     | NA      | NA       | NA       | SJC_S000070 | NA     | NA     | NA | Sjp_0015250.1 | NA                        | NA       |
| HSB10kb_179 | WZ      | 5480172  | 5731781  | SJC_S000070 | 113362 | 293219 | -  | Sjp_0015260.1 | response to stimulus      | NA       |
| HSB10kb_179 | WZ      | 5480172  | 5731781  | SJC_S000070 | 113362 | 293219 | -  | Sjp_0015270.1 | biological regulation     | 0.76396  |
| HSB10kb_179 | WZ      | 5480172  | 5731781  | SJC_S000070 | 113362 | 293219 | -  | Sjp_0015280.1 | enzyme regulator activity | 0.1755   |
| HSB10kb_179 | WZ      | 5480172  | 5731781  | SJC_S000070 | 113362 | 293219 | -  | Sjp_0015290.1 | catalytic activity        | 0.035844 |
| EBR10kb_122 | "WZ,WZ" | NA       | NA       | SJC_S000070 | 293220 | 367857 | NA | Sjp_0015300.1 | biological regulation     | 0.76396  |
| EBR10kb_122 | "WZ,WZ" | NA       | NA       | SJC_S000070 | 293220 | 367857 | NA | Sjp_0015310.1 | transporter activity      | 0.782    |



|             |         |         |         |             |        |        |    |               |                               |          |
|-------------|---------|---------|---------|-------------|--------|--------|----|---------------|-------------------------------|----------|
| EBR10kb_122 | "WZ,WZ" | NA      | NA      | SJC_S000070 | 293220 | 367857 | NA | Sjp_0015320.1 | catalytic activity            | 0.035844 |
| HSB10kb_180 | WZ      | 9339268 | 9486665 | SJC_S000070 | 367858 | 496875 | +  | Sjp_0015330.1 | NA                            | NA       |
| HSB10kb_180 | WZ      | 9339268 | 9486665 | SJC_S000070 | 367858 | 496875 | +  | Sjp_0015340.1 | molecular transducer activity | 0.50162  |
| HSB10kb_180 | WZ      | 9339268 | 9486665 | SJC_S000070 | 367858 | 496875 | +  | Sjp_0015350.1 | transporter activity          | 0.782    |
| EBR10kb_123 | "WZ,2"  | NA      | NA      | SJC_S000070 | 496876 | 532366 | NA | Sjp_0015350.1 | transporter activity          | 0.782    |
| EBR10kb_123 | "WZ,2"  | NA      | NA      | SJC_S000070 | 496876 | 532366 | NA | Sjp_0015360.1 | NA                            | NA       |
| EBR10kb_123 | "WZ,2"  | NA      | NA      | SJC_S000070 | 496876 | 532366 | NA | Sjp_0015370.1 | catalytic activity            | 0.035844 |
| EBR10kb_123 | "WZ,2"  | NA      | NA      | SJC_S000070 | 496876 | 532366 | NA | Sjp_0015380.1 | response to stimulus          | NA       |
| HSB10kb_181 | 2       | 5639035 | 5653961 | SJC_S000070 | 532367 | 567705 | -  | Sjp_0015380.1 | response to stimulus          | NA       |
| HSB10kb_181 | 2       | 5639035 | 5653961 | SJC_S000070 | 532367 | 567705 | -  | Sjp_0015390.1 | NA                            | NA       |
| HSB10kb_181 | 2       | 5639035 | 5653961 | SJC_S000070 | 532367 | 567705 | -  | Sjp_0015400.1 | binding                       | 0.052762 |
| HSB10kb_181 | 2       | 5639035 | 5653961 | SJC_S000070 | 532367 | 567705 | -  | Sjp_0015410.1 | catalytic activity            | 0.035844 |
| EBR10kb_124 | "2,2"   | NA      | NA      | SJC_S000070 | 567706 | 570432 | NA | Sjp_0015410.1 | catalytic activity            | 0.035844 |
| HSB10kb_182 | 2       | 5580928 | 5603277 | SJC_S000070 | 570433 | 589205 | -  | Sjp_0015410.1 | catalytic activity            | 0.035844 |
| EBR10kb_125 | "2,2"   | NA      | NA      | SJC_S000070 | 589206 | 644835 | NA | Sjp_0015420.1 | binding                       | 0.052762 |
| EBR10kb_125 | "2,2"   | NA      | NA      | SJC_S000070 | 589206 | 644835 | NA | Sjp_0015430.1 | catalytic activity            | 0.035844 |
| HSB10kb_183 | 2       | 5606967 | 5621629 | SJC_S000070 | 644836 | 661943 | +  | Sjp_0015430.1 | catalytic activity            | 0.035844 |
| unknown     | NA      | NA      | NA      | SJC_S000071 | NA     | NA     | NA | Sjp_0015440.1 | NA                            | NA       |
| unknown     | NA      | NA      | NA      | SJC_S000071 | NA     | NA     | NA | Sjp_0015450.1 | cellular process              | 0.63852  |
| unknown     | NA      | NA      | NA      | SJC_S000071 | NA     | NA     | NA | Sjp_0015460.1 | metabolic process             | 0.41934  |
| unknown     | NA      | NA      | NA      | SJC_S000072 | NA     | NA     | NA | Sjp_0015470.1 | NA                            | NA       |
| unknown     | NA      | NA      | NA      | SJC_S000072 | NA     | NA     | NA | Sjp_0015480.1 | enzyme regulator activity     | 0.1755   |
| unknown     | NA      | NA      | NA      | SJC_S000072 | NA     | NA     | NA | Sjp_0015500.1 | NA                            | NA       |
| HSB10kb_184 | 2       | 4316047 | 4372725 | SJC_S000072 | 156461 | 267506 | +  | Sjp_0015510.1 | NA                            | NA       |
| HSB10kb_184 | 2       | 4316047 | 4372725 | SJC_S000072 | 156461 | 267506 | +  | Sjp_0015520.1 | NA                            | NA       |

|             |       |          |          |             |        |        |    |               |                       |          |
|-------------|-------|----------|----------|-------------|--------|--------|----|---------------|-----------------------|----------|
| HSB10kb_184 | 2     | 4316047  | 4372725  | SJC_S000072 | 156461 | 267506 | +  | Sjp_0015530.1 | NA                    | NA       |
| HSB10kb_184 | 2     | 4316047  | 4372725  | SJC_S000072 | 156461 | 267506 | +  | Sjp_0015540.1 | catalytic activity    | 0.035844 |
| HSB10kb_184 | 2     | 4316047  | 4372725  | SJC_S000072 | 156461 | 267506 | +  | Sjp_0015550.1 | cellular process      | 0.63852  |
| HSB10kb_184 | 2     | 4316047  | 4372725  | SJC_S000072 | 156461 | 267506 | +  | Sjp_0015560.1 | cellular process      | 0.63852  |
| EBR10kb_126 | "2,3" | NA       | NA       | SJC_S000072 | 267507 | 312888 | NA | Sjp_0015560.1 | cellular process      | 0.63852  |
| EBR10kb_126 | "2,3" | NA       | NA       | SJC_S000072 | 267507 | 312888 | NA | Sjp_0015570.1 | NA                    | NA       |
| HSB10kb_185 | 3     | 543712   | 725952   | SJC_S000072 | 312889 | 476471 | -  | Sjp_0015570.1 | NA                    | NA       |
| HSB10kb_185 | 3     | 543712   | 725952   | SJC_S000072 | 312889 | 476471 | -  | Sjp_0015580.1 | NA                    | NA       |
| HSB10kb_185 | 3     | 543712   | 725952   | SJC_S000072 | 312889 | 476471 | -  | Sjp_0015590.1 | reproductive process  | NA       |
| HSB10kb_185 | 3     | 543712   | 725952   | SJC_S000072 | 312889 | 476471 | -  | Sjp_0015600.1 | reproductive process  | NA       |
| HSB10kb_185 | 3     | 543712   | 725952   | SJC_S000072 | 312889 | 476471 | -  | Sjp_0015610.1 | reproductive process  | NA       |
| HSB10kb_185 | 3     | 543712   | 725952   | SJC_S000072 | 312889 | 476471 | -  | Sjp_0015620.1 | NA                    | NA       |
| EBR10kb_127 | "3,3" | NA       | NA       | SJC_S000072 | 476472 | 495650 | NA | NA            | NA                    | NA       |
| HSB10kb_186 | 3     | 265946   | 474845   | SJC_S000072 | 495651 | 676812 | +  | Sjp_0015630.1 | transporter activity  | 0.782    |
| HSB10kb_186 | 3     | 265946   | 474845   | SJC_S000072 | 495651 | 676812 | +  | Sjp_0015640.1 | NA                    | NA       |
| HSB10kb_186 | 3     | 265946   | 474845   | SJC_S000072 | 495651 | 676812 | +  | Sjp_0015650.1 | biological regulation | 0.76396  |
| HSB10kb_186 | 3     | 265946   | 474845   | SJC_S000072 | 495651 | 676812 | +  | Sjp_0015660.1 | binding               | 0.052762 |
| HSB10kb_186 | 3     | 265946   | 474845   | SJC_S000072 | 495651 | 676812 | +  | Sjp_0015670.1 | biological regulation | 0.76396  |
| HSB10kb_187 | 1     | 37979213 | 38041810 | SJC_S000073 | 20255  | 58486  | -  | Sjp_0015680.1 | NA                    | NA       |
| HSB10kb_187 | 1     | 37979213 | 38041810 | SJC_S000073 | 20255  | 58486  | -  | Sjp_0015690.1 | catalytic activity    | 0.035844 |
| HSB10kb_187 | 1     | 37979213 | 38041810 | SJC_S000073 | 20255  | 58486  | -  | Sjp_0015700.1 | cell part             | 0.009037 |
| EBR10kb_128 | "1,1" | NA       | NA       | SJC_S000073 | 58487  | 63573  | NA | Sjp_0015710.1 | binding               | 0.052762 |
| HSB10kb_188 | 1     | 37930068 | 37975417 | SJC_S000073 | 63574  | 129673 | +  | Sjp_0015710.1 | binding               | 0.052762 |
| HSB10kb_188 | 1     | 37930068 | 37975417 | SJC_S000073 | 63574  | 129673 | +  | Sjp_0015720.1 | binding               | 0.052762 |
| HSB10kb_188 | 1     | 37930068 | 37975417 | SJC_S000073 | 63574  | 129673 | +  | Sjp_0015740.1 | biological regulation | 0.76396  |
| EBR10kb_129 | "1,1" | NA       | NA       | SJC_S000073 | 129674 | 192335 | NA | NA            | NA                    | NA       |
| HSB10kb_189 | 1     | 38086296 | 38297728 | SJC_S000073 | 192336 | 379197 | +  | Sjp_0015750.1 | biological            | 0.76396  |

|             |       |          |          |             |        |        |    |               |                               |          |
|-------------|-------|----------|----------|-------------|--------|--------|----|---------------|-------------------------------|----------|
|             |       |          |          |             |        |        |    |               | regulation                    |          |
| HSB10kb_189 | 1     | 38086296 | 38297728 | SJC_S000073 | 192336 | 379197 | +  | Sjp_0015760.1 | NA                            | NA       |
| HSB10kb_189 | 1     | 38086296 | 38297728 | SJC_S000073 | 192336 | 379197 | +  | Sjp_0015770.1 | NA                            | NA       |
| HSB10kb_189 | 1     | 38086296 | 38297728 | SJC_S000073 | 192336 | 379197 | +  | Sjp_0015780.1 | catalytic activity            | 0.035844 |
| HSB10kb_189 | 1     | 38086296 | 38297728 | SJC_S000073 | 192336 | 379197 | +  | Sjp_0015790.1 | NA                            | NA       |
| HSB10kb_189 | 1     | 38086296 | 38297728 | SJC_S000073 | 192336 | 379197 | +  | Sjp_0015800.1 | catalytic activity            | 0.035844 |
| unknown     | NA    | NA       | NA       | SJC_S000074 | NA     | NA     | NA | Sjp_0015810.1 | NA                            | NA       |
| unknown     | NA    | NA       | NA       | SJC_S000074 | NA     | NA     | NA | Sjp_0015820.1 | catalytic activity            | 0.035844 |
| unknown     | NA    | NA       | NA       | SJC_S000074 | NA     | NA     | NA | Sjp_0015830.1 | NA                            | NA       |
| unknown     | NA    | NA       | NA       | SJC_S000074 | NA     | NA     | NA | Sjp_0015840.1 | NA                            | NA       |
| unknown     | NA    | NA       | NA       | SJC_S000074 | NA     | NA     | NA | Sjp_0015850.1 | NA                            | NA       |
| unknown     | NA    | NA       | NA       | SJC_S000074 | NA     | NA     | NA | Sjp_0015860.1 | NA                            | NA       |
| unknown     | NA    | NA       | NA       | SJC_S000074 | NA     | NA     | NA | Sjp_0015870.1 | NA                            | NA       |
| HSB10kb_190 | 1     | 62299062 | 62459830 | SJC_S000075 | 10186  | 282704 | -  | Sjp_0015880.1 | NA                            | NA       |
| HSB10kb_190 | 1     | 62299062 | 62459830 | SJC_S000075 | 10186  | 282704 | -  | Sjp_0015890.1 | NA                            | NA       |
| HSB10kb_190 | 1     | 62299062 | 62459830 | SJC_S000075 | 10186  | 282704 | -  | Sjp_0015900.1 | NA                            | NA       |
| HSB10kb_190 | 1     | 62299062 | 62459830 | SJC_S000075 | 10186  | 282704 | -  | Sjp_0015910.1 | NA                            | NA       |
| HSB10kb_190 | 1     | 62299062 | 62459830 | SJC_S000075 | 10186  | 282704 | -  | Sjp_0015920.1 | NA                            | NA       |
| HSB10kb_190 | 1     | 62299062 | 62459830 | SJC_S000075 | 10186  | 282704 | -  | Sjp_0015930.1 | catalytic activity            | 0.035844 |
| HSB10kb_190 | 1     | 62299062 | 62459830 | SJC_S000075 | 10186  | 282704 | -  | Sjp_0015940.1 | NA                            | NA       |
| EBR10kb_130 | "1,1" | NA       | NA       | SJC_S000075 | 282705 | 285423 | NA | Sjp_0015940.1 | NA                            | NA       |
| HSB10kb_191 | 1     | 62277031 | 62298780 | SJC_S000075 | 285424 | 303590 | +  | Sjp_0015940.1 | NA                            | NA       |
| EBR10kb_131 | "1,1" | NA       | NA       | SJC_S000075 | 303591 | 337090 | NA | Sjp_0015950.1 | NA                            | NA       |
| HSB10kb_192 | 1     | 62195949 | 62244051 | SJC_S000075 | 337091 | 380861 | -  | Sjp_0015960.1 | binding                       | 0.052762 |
| unknown     | NA    | NA       | NA       | SJC_S000075 | NA     | NA     | NA | Sjp_0015970.1 | NA                            | NA       |
| unknown     | NA    | NA       | NA       | SJC_S000075 | NA     | NA     | NA | Sjp_0015980.1 | molecular transducer activity | 0.50162  |
| unknown     | NA    | NA       | NA       | SJC_S000075 | NA     | NA     | NA | Sjp_0015990.1 | cell part                     | 0.009037 |
| unknown     | NA    | NA       | NA       | SJC_S000075 | NA     | NA     | NA | Sjp_0016000.1 | NA                            | NA       |
| unknown     | NA    | NA       | NA       | SJC_S000075 | NA     | NA     | NA | Sjp_0016010.1 | binding                       | 0.052762 |
| unknown     | NA    | NA       | NA       | SJC_S000075 | NA     | NA     | NA | Sjp_0016020.1 | binding                       | 0.052762 |
| unknown     | NA    | NA       | NA       | SJC_S000075 | NA     | NA     | NA | Sjp_0016030.1 | NA                            | NA       |
| unknown     | NA    | NA       | NA       | SJC_S000076 | NA     | NA     | NA | Sjp_0016040.1 | catalytic activity            | 0.035844 |

|             |        |          |          |             |        |        |    |               |                               |          |
|-------------|--------|----------|----------|-------------|--------|--------|----|---------------|-------------------------------|----------|
| HSB10kb_193 | 1      | 11562173 | 11648848 | SJC_S000076 | 123450 | 199692 | -  | Sjp_0016060.1 | NA                            | NA       |
| HSB10kb_193 | 1      | 11562173 | 11648848 | SJC_S000076 | 123450 | 199692 | -  | Sjp_0016070.1 | binding                       | 0.052762 |
| unknown     | NA     | NA       | NA       | SJC_S000076 | NA     | NA     | NA | Sjp_0016080.1 | NA                            | NA       |
| unknown     | NA     | NA       | NA       | SJC_S000076 | NA     | NA     | NA | Sjp_0016090.1 | NA                            | NA       |
| unknown     | NA     | NA       | NA       | SJC_S000076 | NA     | NA     | NA | Sjp_0016100.1 | NA                            | NA       |
| unknown     | NA     | NA       | NA       | SJC_S000076 | NA     | NA     | NA | Sjp_0016110.1 | NA                            | NA       |
| unknown     | NA     | NA       | NA       | SJC_S000076 | NA     | NA     | NA | Sjp_0016120.1 | molecular transducer activity | 0.50162  |
| unknown     | NA     | NA       | NA       | SJC_S000076 | NA     | NA     | NA | Sjp_0016130.1 | NA                            | NA       |
| unknown     | NA     | NA       | NA       | SJC_S000077 | NA     | NA     | NA | Sjp_0016150.1 | NA                            | NA       |
| unknown     | NA     | NA       | NA       | SJC_S000077 | NA     | NA     | NA | Sjp_0016160.1 | catalytic activity            | 0.035844 |
| HSB10kb_194 | 4      | 11600632 | 11622176 | SJC_S000077 | 34634  | 49441  | +  | Sjp_0016170.1 | biological regulation         | 0.76396  |
| EBR10kb_132 | "4,4"  | NA       | NA       | SJC_S000077 | 49442  | 55499  | NA | Sjp_0016170.1 | biological regulation         | 0.76396  |
| EBR10kb_132 | "4,4"  | NA       | NA       | SJC_S000077 | 49442  | 55499  | NA | Sjp_0016180.1 | NA                            | NA       |
| HSB10kb_195 | 4      | 11516618 | 11559656 | SJC_S000077 | 55500  | 93889  | -  | Sjp_0016180.1 | NA                            | NA       |
| HSB10kb_195 | 4      | 11516618 | 11559656 | SJC_S000077 | 55500  | 93889  | -  | Sjp_0016190.1 | binding                       | 0.052762 |
| EBR10kb_133 | "4,4"  | NA       | NA       | SJC_S000077 | 93890  | 123981 | NA | Sjp_0016190.1 | binding                       | 0.052762 |
| EBR10kb_133 | "4,4"  | NA       | NA       | SJC_S000077 | 93890  | 123981 | NA | Sjp_0016200.1 | NA                            | NA       |
| HSB10kb_196 | 4      | 11688078 | 11846557 | SJC_S000077 | 123982 | 273300 | +  | Sjp_0016200.1 | NA                            | NA       |
| HSB10kb_196 | 4      | 11688078 | 11846557 | SJC_S000077 | 123982 | 273300 | +  | Sjp_0016210.1 | NA                            | NA       |
| HSB10kb_196 | 4      | 11688078 | 11846557 | SJC_S000077 | 123982 | 273300 | +  | Sjp_0016220.1 | NA                            | NA       |
| HSB10kb_196 | 4      | 11688078 | 11846557 | SJC_S000077 | 123982 | 273300 | +  | Sjp_0016230.1 | NA                            | NA       |
| EBR10kb_134 | "4,WZ" | NA       | NA       | SJC_S000077 | 273301 | 389479 | NA | Sjp_0016240.1 | catalytic activity            | 0.035844 |
| EBR10kb_134 | "4,WZ" | NA       | NA       | SJC_S000077 | 273301 | 389479 | NA | Sjp_0016250.1 | NA                            | NA       |
| EBR10kb_134 | "4,WZ" | NA       | NA       | SJC_S000077 | 273301 | 389479 | NA | Sjp_0016260.1 | NA                            | NA       |
| EBR10kb_134 | "4,WZ" | NA       | NA       | SJC_S000077 | 273301 | 389479 | NA | Sjp_0016270.1 | NA                            | NA       |
| HSB10kb_197 | WZ     | 46099552 | 46464372 | SJC_S000077 | 389480 | 750066 | -  | Sjp_0016270.1 | NA                            | NA       |
| HSB10kb_197 | WZ     | 46099552 | 46464372 | SJC_S000077 | 389480 | 750066 | -  | Sjp_0016280.1 | enzyme regulator activity     | 0.1755   |
| HSB10kb_197 | WZ     | 46099552 | 46464372 | SJC_S000077 | 389480 | 750066 | -  | Sjp_0016290.1 | binding                       | 0.052762 |

|             |    |          |          |             |        |        |    |               |                               |          |
|-------------|----|----------|----------|-------------|--------|--------|----|---------------|-------------------------------|----------|
| HSB10kb_197 | WZ | 46099552 | 46464372 | SJC_S000077 | 389480 | 750066 | -  | Sjp_0016300.1 | NA                            | NA       |
| HSB10kb_197 | WZ | 46099552 | 46464372 | SJC_S000077 | 389480 | 750066 | -  | Sjp_0016310.1 | NA                            | NA       |
| HSB10kb_197 | WZ | 46099552 | 46464372 | SJC_S000077 | 389480 | 750066 | -  | Sjp_0016330.1 | NA                            | NA       |
| HSB10kb_197 | WZ | 46099552 | 46464372 | SJC_S000077 | 389480 | 750066 | -  | Sjp_0016340.1 | NA                            | NA       |
| HSB10kb_197 | WZ | 46099552 | 46464372 | SJC_S000077 | 389480 | 750066 | -  | Sjp_0016350.1 | NA                            | NA       |
| HSB10kb_197 | WZ | 46099552 | 46464372 | SJC_S000077 | 389480 | 750066 | -  | Sjp_0016360.1 | NA                            | NA       |
| HSB10kb_197 | WZ | 46099552 | 46464372 | SJC_S000077 | 389480 | 750066 | -  | Sjp_0016370.1 | NA                            | NA       |
| HSB10kb_197 | WZ | 46099552 | 46464372 | SJC_S000077 | 389480 | 750066 | -  | Sjp_0016380.1 | cell part                     | 0.009037 |
| HSB10kb_198 | 3  | 26755072 | 27197811 | SJC_S000078 | 40464  | 440750 | -  | Sjp_0016390.1 | NA                            | NA       |
| HSB10kb_198 | 3  | 26755072 | 27197811 | SJC_S000078 | 40464  | 440750 | -  | Sjp_0016400.1 | NA                            | NA       |
| HSB10kb_198 | 3  | 26755072 | 27197811 | SJC_S000078 | 40464  | 440750 | -  | Sjp_0016410.1 | catalytic activity            | 0.035844 |
| HSB10kb_198 | 3  | 26755072 | 27197811 | SJC_S000078 | 40464  | 440750 | -  | Sjp_0016420.1 | cell part                     | 0.009037 |
| HSB10kb_198 | 3  | 26755072 | 27197811 | SJC_S000078 | 40464  | 440750 | -  | Sjp_0016430.1 | NA                            | NA       |
| HSB10kb_198 | 3  | 26755072 | 27197811 | SJC_S000078 | 40464  | 440750 | -  | Sjp_0016440.1 | catalytic activity            | 0.035844 |
| HSB10kb_198 | 3  | 26755072 | 27197811 | SJC_S000078 | 40464  | 440750 | -  | Sjp_0016450.1 | catalytic activity            | 0.035844 |
| HSB10kb_198 | 3  | 26755072 | 27197811 | SJC_S000078 | 40464  | 440750 | -  | Sjp_0016460.1 | cell part                     | 0.009037 |
| HSB10kb_198 | 3  | 26755072 | 27197811 | SJC_S000078 | 40464  | 440750 | -  | Sjp_0016470.1 | NA                            | NA       |
| HSB10kb_198 | 3  | 26755072 | 27197811 | SJC_S000078 | 40464  | 440750 | -  | Sjp_0016480.1 | NA                            | NA       |
| HSB10kb_198 | 3  | 26755072 | 27197811 | SJC_S000078 | 40464  | 440750 | -  | Sjp_0016490.1 | NA                            | NA       |
| HSB10kb_198 | 3  | 26755072 | 27197811 | SJC_S000078 | 40464  | 440750 | -  | Sjp_0016500.1 | establishment of localization | NA       |
| HSB10kb_198 | 3  | 26755072 | 27197811 | SJC_S000078 | 40464  | 440750 | -  | Sjp_0016510.1 | catalytic activity            | 0.035844 |
| HSB10kb_198 | 3  | 26755072 | 27197811 | SJC_S000078 | 40464  | 440750 | -  | Sjp_0016520.1 | catalytic activity            | 0.035844 |
| HSB10kb_198 | 3  | 26755072 | 27197811 | SJC_S000078 | 40464  | 440750 | -  | Sjp_0016530.1 | NA                            | NA       |
| HSB10kb_198 | 3  | 26755072 | 27197811 | SJC_S000078 | 40464  | 440750 | -  | Sjp_0016540.1 | NA                            | NA       |
| HSB10kb_198 | 3  | 26755072 | 27197811 | SJC_S000078 | 40464  | 440750 | -  | Sjp_0016550.1 | transporter activity          | 0.782    |
| unknown     | NA | NA       | NA       | SJC_S000079 | NA     | NA     | NA | Sjp_0016560.1 | NA                            | NA       |
| unknown     | NA | NA       | NA       | SJC_S000079 | NA     | NA     | NA | Sjp_0016570.1 | NA                            | NA       |
| unknown     | NA | NA       | NA       | SJC_S000079 | NA     | NA     | NA | Sjp_0016580.1 | NA                            | NA       |
| HSB10kb_199 | 1  | 54942884 | 55106945 | SJC_S000080 | 42035  | 308473 | -  | Sjp_0016590.1 | NA                            | NA       |
| HSB10kb_199 | 1  | 54942884 | 55106945 | SJC_S000080 | 42035  | 308473 | -  | Sjp_0016600.1 | catalytic activity            | 0.035844 |
| HSB10kb_199 | 1  | 54942884 | 55106945 | SJC_S000080 | 42035  | 308473 | -  | Sjp_0016610.1 | NA                            | NA       |
| HSB10kb_199 | 1  | 54942884 | 55106945 | SJC_S000080 | 42035  | 308473 | -  | Sjp_0016620.1 | catalytic activity            | 0.035844 |

|             |       |          |          |             |        |        |    |               |                                               |          |
|-------------|-------|----------|----------|-------------|--------|--------|----|---------------|-----------------------------------------------|----------|
| HSB10kb_199 | 1     | 54942884 | 55106945 | SJC_S000080 | 42035  | 308473 | -  | Sjp_0016630.1 | NA                                            | NA       |
| HSB10kb_199 | 1     | 54942884 | 55106945 | SJC_S000080 | 42035  | 308473 | -  | Sjp_0016640.1 | NA                                            | NA       |
| EBR10kb_135 | "1,2" | NA       | NA       | SJC_S000080 | 308474 | 315679 | NA | Sjp_0016650.1 | cell part                                     | 0.009037 |
| HSB10kb_200 | 2     | 25932950 | 26279370 | SJC_S000080 | 315680 | 708072 | -  | Sjp_0016660.1 | NA                                            | NA       |
| HSB10kb_200 | 2     | 25932950 | 26279370 | SJC_S000080 | 315680 | 708072 | -  | Sjp_0016670.1 | catalytic activity                            | 0.035844 |
| HSB10kb_200 | 2     | 25932950 | 26279370 | SJC_S000080 | 315680 | 708072 | -  | Sjp_0016680.1 | catalytic activity                            | 0.035844 |
| HSB10kb_200 | 2     | 25932950 | 26279370 | SJC_S000080 | 315680 | 708072 | -  | Sjp_0016690.1 | binding                                       | 0.052762 |
| HSB10kb_200 | 2     | 25932950 | 26279370 | SJC_S000080 | 315680 | 708072 | -  | Sjp_0016700.1 | binding                                       | 0.052762 |
| HSB10kb_200 | 2     | 25932950 | 26279370 | SJC_S000080 | 315680 | 708072 | -  | Sjp_0016710.1 | NA                                            | NA       |
| HSB10kb_200 | 2     | 25932950 | 26279370 | SJC_S000080 | 315680 | 708072 | -  | Sjp_0016720.1 | NA                                            | NA       |
| HSB10kb_200 | 2     | 25932950 | 26279370 | SJC_S000080 | 315680 | 708072 | -  | Sjp_0016730.1 | NA                                            | NA       |
| HSB10kb_200 | 2     | 25932950 | 26279370 | SJC_S000080 | 315680 | 708072 | -  | Sjp_0016740.1 | NA                                            | NA       |
| HSB10kb_200 | 2     | 25932950 | 26279370 | SJC_S000080 | 315680 | 708072 | -  | Sjp_0016760.1 | NA                                            | NA       |
| HSB10kb_200 | 2     | 25932950 | 26279370 | SJC_S000080 | 315680 | 708072 | -  | Sjp_0016770.1 | cellular component organization or biogenesis | NA       |
| HSB10kb_200 | 2     | 25932950 | 26279370 | SJC_S000080 | 315680 | 708072 | -  | Sjp_0016780.1 | transporter activity                          | 0.782    |
| HSB10kb_201 | 1     | 14423686 | 14694280 | SJC_S000081 | 1      | 314956 | +  | Sjp_0016790.1 | NA                                            | NA       |
| HSB10kb_201 | 1     | 14423686 | 14694280 | SJC_S000081 | 1      | 314956 | +  | Sjp_0016800.1 | NA                                            | NA       |
| HSB10kb_201 | 1     | 14423686 | 14694280 | SJC_S000081 | 1      | 314956 | +  | Sjp_0016810.1 | NA                                            | NA       |
| HSB10kb_201 | 1     | 14423686 | 14694280 | SJC_S000081 | 1      | 314956 | +  | Sjp_0016820.1 | NA                                            | NA       |
| HSB10kb_201 | 1     | 14423686 | 14694280 | SJC_S000081 | 1      | 314956 | +  | Sjp_0016830.1 | NA                                            | NA       |
| HSB10kb_201 | 1     | 14423686 | 14694280 | SJC_S000081 | 1      | 314956 | +  | Sjp_0016840.1 | biological regulation                         | 0.76396  |
| HSB10kb_201 | 1     | 14423686 | 14694280 | SJC_S000081 | 1      | 314956 | +  | Sjp_0016850.1 | cell part                                     | 0.009037 |
| HSB10kb_201 | 1     | 14423686 | 14694280 | SJC_S000081 | 1      | 314956 | +  | Sjp_0016860.1 | NA                                            | NA       |
| HSB10kb_201 | 1     | 14423686 | 14694280 | SJC_S000081 | 1      | 314956 | +  | Sjp_0016870.1 | transporter activity                          | 0.782    |
| HSB10kb_201 | 1     | 14423686 | 14694280 | SJC_S000081 | 1      | 314956 | +  | Sjp_0016880.1 | NA                                            | NA       |
| EBR10kb_136 | "1,1" | NA       | NA       | SJC_S000081 | 314957 | 375183 | NA | Sjp_0016890.1 | NA                                            | NA       |
| EBR10kb_136 | "1,1" | NA       | NA       | SJC_S000081 | 314957 | 375183 | NA | Sjp_0016900.1 | binding                                       | 0.052762 |
| HSB10kb_202 | 1     | 14720299 | 15024127 | SJC_S000081 | 375184 | 638018 | -  | Sjp_0016900.1 | binding                                       | 0.052762 |

|             |       |          |          |             |        |        |    |               |                       |          |
|-------------|-------|----------|----------|-------------|--------|--------|----|---------------|-----------------------|----------|
| HSB10kb_202 | 1     | 14720299 | 15024127 | SJC_S000081 | 375184 | 638018 | -  | Sjp_0016910.1 | NA                    | NA       |
| HSB10kb_202 | 1     | 14720299 | 15024127 | SJC_S000081 | 375184 | 638018 | -  | Sjp_0016920.1 | metabolic process     | 0.41934  |
| HSB10kb_202 | 1     | 14720299 | 15024127 | SJC_S000081 | 375184 | 638018 | -  | Sjp_0016930.1 | NA                    | NA       |
| HSB10kb_202 | 1     | 14720299 | 15024127 | SJC_S000081 | 375184 | 638018 | -  | Sjp_0016940.1 | NA                    | NA       |
| HSB10kb_202 | 1     | 14720299 | 15024127 | SJC_S000081 | 375184 | 638018 | -  | Sjp_0016950.1 | NA                    | NA       |
| HSB10kb_202 | 1     | 14720299 | 15024127 | SJC_S000081 | 375184 | 638018 | -  | Sjp_0016960.1 | NA                    | NA       |
| HSB10kb_202 | 1     | 14720299 | 15024127 | SJC_S000081 | 375184 | 638018 | -  | Sjp_0016970.1 | NA                    | NA       |
| HSB10kb_202 | 1     | 14720299 | 15024127 | SJC_S000081 | 375184 | 638018 | -  | Sjp_0016990.1 | catalytic activity    | 0.035844 |
| HSB10kb_202 | 1     | 14720299 | 15024127 | SJC_S000081 | 375184 | 638018 | -  | Sjp_0017000.1 | NA                    | NA       |
| HSB10kb_202 | 1     | 14720299 | 15024127 | SJC_S000081 | 375184 | 638018 | -  | Sjp_0017010.1 | NA                    | NA       |
| HSB10kb_202 | 1     | 14720299 | 15024127 | SJC_S000081 | 375184 | 638018 | -  | Sjp_0017020.1 | NA                    | NA       |
| unknown     | NA    | NA       | NA       | SJC_S000082 | NA     | NA     | NA | Sjp_0017030.1 | NA                    | NA       |
| unknown     | NA    | NA       | NA       | SJC_S000082 | NA     | NA     | NA | Sjp_0017040.1 | NA                    | NA       |
| unknown     | NA    | NA       | NA       | SJC_S000082 | NA     | NA     | NA | Sjp_0017050.1 | NA                    | NA       |
| unknown     | NA    | NA       | NA       | SJC_S000082 | NA     | NA     | NA | Sjp_0017060.1 | NA                    | NA       |
| unknown     | NA    | NA       | NA       | SJC_S000082 | NA     | NA     | NA | Sjp_0017070.1 | NA                    | NA       |
| HSB10kb_203 | 2     | 10230660 | 10587051 | SJC_S000083 | 62061  | 418319 | -  | Sjp_0017080.1 | NA                    | NA       |
| HSB10kb_203 | 2     | 10230660 | 10587051 | SJC_S000083 | 62061  | 418319 | -  | Sjp_0017090.1 | NA                    | NA       |
| HSB10kb_203 | 2     | 10230660 | 10587051 | SJC_S000083 | 62061  | 418319 | -  | Sjp_0017100.1 | biological regulation | 0.76396  |
| HSB10kb_203 | 2     | 10230660 | 10587051 | SJC_S000083 | 62061  | 418319 | -  | Sjp_0017110.1 | NA                    | NA       |
| HSB10kb_203 | 2     | 10230660 | 10587051 | SJC_S000083 | 62061  | 418319 | -  | Sjp_0017120.1 | binding               | 0.052762 |
| HSB10kb_203 | 2     | 10230660 | 10587051 | SJC_S000083 | 62061  | 418319 | -  | Sjp_0017130.1 | NA                    | NA       |
| HSB10kb_203 | 2     | 10230660 | 10587051 | SJC_S000083 | 62061  | 418319 | -  | Sjp_0017150.1 | NA                    | NA       |
| HSB10kb_203 | 2     | 10230660 | 10587051 | SJC_S000083 | 62061  | 418319 | -  | Sjp_0017160.1 | NA                    | NA       |
| HSB10kb_203 | 2     | 10230660 | 10587051 | SJC_S000083 | 62061  | 418319 | -  | Sjp_0017170.1 | transporter activity  | 0.782    |
| HSB10kb_203 | 2     | 10230660 | 10587051 | SJC_S000083 | 62061  | 418319 | -  | Sjp_0017180.1 | transporter activity  | 0.782    |
| HSB10kb_203 | 2     | 10230660 | 10587051 | SJC_S000083 | 62061  | 418319 | -  | Sjp_0017190.1 | binding               | 0.052762 |
| EBR10kb_137 | "2,2" | NA       | NA       | SJC_S000083 | 418320 | 451590 | NA | Sjp_0017200.1 | biological regulation | 0.76396  |
| HSB10kb_204 | 2     | 10028155 | 10043780 | SJC_S000083 | 451591 | 475843 | +  | Sjp_0017200.1 | biological            | 0.76396  |

|             |       |          |          |             |        |        |    |               |                      |          |
|-------------|-------|----------|----------|-------------|--------|--------|----|---------------|----------------------|----------|
|             |       |          |          |             |        |        |    |               | regulation           |          |
| HSB10kb_204 | 2     | 10028155 | 10043780 | SJC_S000083 | 451591 | 475843 | +  | Sjp_0017210.1 | cell part            | 0.009037 |
| EBR10kb_138 | "2,2" | NA       | NA       | SJC_S000083 | 475844 | 480611 | NA | Sjp_0017210.1 | cell part            | 0.009037 |
| HSB10kb_205 | 2     | 10180204 | 10226060 | SJC_S000083 | 480612 | 530877 | -  | Sjp_0017210.1 | cell part            | 0.009037 |
| HSB10kb_205 | 2     | 10180204 | 10226060 | SJC_S000083 | 480612 | 530877 | -  | Sjp_0017220.1 | NA                   | NA       |
| EBR10kb_139 | "2,2" | NA       | NA       | SJC_S000083 | 530878 | 541902 | NA | Sjp_0017230.1 | NA                   | NA       |
| HSB10kb_206 | 2     | 10086567 | 10167334 | SJC_S000083 | 541903 | 599993 | +  | Sjp_0017240.1 | NA                   | NA       |
| HSB10kb_206 | 2     | 10086567 | 10167334 | SJC_S000083 | 541903 | 599993 | +  | Sjp_0017250.1 | NA                   | NA       |
| EBR10kb_140 | "2,2" | NA       | NA       | SJC_S000083 | 599994 | 636797 | NA | Sjp_0017260.1 | catalytic activity   | 0.035844 |
| HSB10kb_207 | 2     | 9945090  | 9967134  | SJC_S000083 | 636798 | 660731 | -  | Sjp_0017260.1 | catalytic activity   | 0.035844 |
| HSB10kb_207 | 2     | 9945090  | 9967134  | SJC_S000083 | 636798 | 660731 | -  | Sjp_0017270.1 | NA                   | NA       |
| HSB10kb_207 | 2     | 9945090  | 9967134  | SJC_S000083 | 636798 | 660731 | -  | Sjp_0017280.1 | NA                   | NA       |
| unknown     | NA    | NA       | NA       | SJC_S000083 | NA     | NA     | NA | Sjp_0017290.1 | NA                   | NA       |
| unknown     | NA    | NA       | NA       | SJC_S000083 | NA     | NA     | NA | Sjp_0017300.1 | NA                   | NA       |
| HSB10kb_208 | 2     | 28899071 | 29155787 | SJC_S000084 | 22721  | 265072 | -  | Sjp_0017310.1 | NA                   | NA       |
| HSB10kb_208 | 2     | 28899071 | 29155787 | SJC_S000084 | 22721  | 265072 | -  | Sjp_0017330.1 | NA                   | NA       |
| HSB10kb_208 | 2     | 28899071 | 29155787 | SJC_S000084 | 22721  | 265072 | -  | Sjp_0017340.1 | cell part            | 0.009037 |
| HSB10kb_208 | 2     | 28899071 | 29155787 | SJC_S000084 | 22721  | 265072 | -  | Sjp_0017350.1 | cell part            | 0.009037 |
| HSB10kb_208 | 2     | 28899071 | 29155787 | SJC_S000084 | 22721  | 265072 | -  | Sjp_0017360.1 | NA                   | NA       |
| HSB10kb_208 | 2     | 28899071 | 29155787 | SJC_S000084 | 22721  | 265072 | -  | Sjp_0017370.1 | NA                   | NA       |
| HSB10kb_208 | 2     | 28899071 | 29155787 | SJC_S000084 | 22721  | 265072 | -  | Sjp_0017380.1 | NA                   | NA       |
| HSB10kb_208 | 2     | 28899071 | 29155787 | SJC_S000084 | 22721  | 265072 | -  | Sjp_0017390.1 | binding              | 0.052762 |
| HSB10kb_208 | 2     | 28899071 | 29155787 | SJC_S000084 | 22721  | 265072 | -  | Sjp_0017400.1 | NA                   | NA       |
| HSB10kb_208 | 2     | 28899071 | 29155787 | SJC_S000084 | 22721  | 265072 | -  | Sjp_0017410.1 | NA                   | NA       |
| HSB10kb_208 | 2     | 28899071 | 29155787 | SJC_S000084 | 22721  | 265072 | -  | Sjp_0017420.1 | NA                   | NA       |
| EBR10kb_141 | "2,2" | NA       | NA       | SJC_S000084 | 265073 | 293535 | NA | Sjp_0017420.1 | NA                   | NA       |
| EBR10kb_141 | "2,2" | NA       | NA       | SJC_S000084 | 265073 | 293535 | NA | Sjp_0017430.1 | response to stimulus | NA       |
| HSB10kb_209 | 2     | 28666273 | 28866573 | SJC_S000084 | 293536 | 458110 | -  | Sjp_0017430.1 | response to stimulus | NA       |
| HSB10kb_209 | 2     | 28666273 | 28866573 | SJC_S000084 | 293536 | 458110 | -  | Sjp_0017440.1 | transporter activity | 0.782    |
| HSB10kb_209 | 2     | 28666273 | 28866573 | SJC_S000084 | 293536 | 458110 | -  | Sjp_0017450.1 | cell part            | 0.009037 |
| HSB10kb_209 | 2     | 28666273 | 28866573 | SJC_S000084 | 293536 | 458110 | -  | Sjp_0017460.1 | NA                   | NA       |



|             |       |          |          |             |        |        |    |               |                                               |          |
|-------------|-------|----------|----------|-------------|--------|--------|----|---------------|-----------------------------------------------|----------|
| HSB10kb_209 | 2     | 28666273 | 28866573 | SJC_S000084 | 293536 | 458110 | -  | Sjp_0017470.1 | cellular component organization or biogenesis | NA       |
| EBR10kb_142 | "2,2" | NA       | NA       | SJC_S000084 | 458111 | 482750 | NA | Sjp_0017470.1 | cellular component organization or biogenesis | NA       |
| HSB10kb_210 | 2     | 28582751 | 28632164 | SJC_S000084 | 482751 | 519724 | -  | Sjp_0017470.1 | cellular component organization or biogenesis | NA       |
| HSB10kb_211 | 2     | 21227124 | 21238672 | SJC_S000085 | 443    | 12296  | -  | Sjp_0017480.1 | NA                                            | NA       |
| EBR10kb_143 | "2,2" | NA       | NA       | SJC_S000085 | 12297  | 71294  | NA | Sjp_0017480.1 | NA                                            | NA       |
| EBR10kb_143 | "2,2" | NA       | NA       | SJC_S000085 | 12297  | 71294  | NA | Sjp_0017490.1 | NA                                            | NA       |
| EBR10kb_143 | "2,2" | NA       | NA       | SJC_S000085 | 12297  | 71294  | NA | Sjp_0017500.1 | NA                                            | NA       |
| HSB10kb_212 | 2     | 21263676 | 21297781 | SJC_S000085 | 71295  | 128379 | +  | Sjp_0017500.1 | NA                                            | NA       |
| HSB10kb_212 | 2     | 21263676 | 21297781 | SJC_S000085 | 71295  | 128379 | +  | Sjp_0017510.1 | NA                                            | NA       |
| HSB10kb_212 | 2     | 21263676 | 21297781 | SJC_S000085 | 71295  | 128379 | +  | Sjp_0017520.1 | NA                                            | NA       |
| HSB10kb_212 | 2     | 21263676 | 21297781 | SJC_S000085 | 71295  | 128379 | +  | Sjp_0017530.1 | NA                                            | NA       |
| EBR10kb_144 | "2,2" | NA       | NA       | SJC_S000085 | 128380 | 156161 | NA | Sjp_0017540.1 | NA                                            | NA       |
| EBR10kb_144 | "2,2" | NA       | NA       | SJC_S000085 | 128380 | 156161 | NA | Sjp_0017550.1 | cellular process                              | 0.63852  |
| HSB10kb_213 | 2     | 20967080 | 21192179 | SJC_S000085 | 156162 | 401389 | -  | Sjp_0017560.1 | cellular process                              | 0.63852  |
| HSB10kb_213 | 2     | 20967080 | 21192179 | SJC_S000085 | 156162 | 401389 | -  | Sjp_0017570.1 | cellular process                              | 0.63852  |
| HSB10kb_213 | 2     | 20967080 | 21192179 | SJC_S000085 | 156162 | 401389 | -  | Sjp_0017580.1 | catalytic activity                            | 0.035844 |
| HSB10kb_213 | 2     | 20967080 | 21192179 | SJC_S000085 | 156162 | 401389 | -  | Sjp_0017590.1 | NA                                            | NA       |
| HSB10kb_213 | 2     | 20967080 | 21192179 | SJC_S000085 | 156162 | 401389 | -  | Sjp_0017600.1 | cell part                                     | 0.009037 |
| HSB10kb_213 | 2     | 20967080 | 21192179 | SJC_S000085 | 156162 | 401389 | -  | Sjp_0017610.1 | catalytic activity                            | 0.035844 |
| HSB10kb_213 | 2     | 20967080 | 21192179 | SJC_S000085 | 156162 | 401389 | -  | Sjp_0017620.1 | NA                                            | NA       |
| HSB10kb_213 | 2     | 20967080 | 21192179 | SJC_S000085 | 156162 | 401389 | -  | Sjp_0017630.1 | catalytic activity                            | 0.035844 |
| HSB10kb_213 | 2     | 20967080 | 21192179 | SJC_S000085 | 156162 | 401389 | -  | Sjp_0017640.1 | binding                                       | 0.052762 |
| unknown     | NA    | NA       | NA       | SJC_S000085 | NA     | NA     | NA | Sjp_0017650.1 | binding                                       | 0.052762 |
| unknown     | NA    | NA       | NA       | SJC_S000085 | NA     | NA     | NA | Sjp_0017660.1 | NA                                            | NA       |
| unknown     | NA    | NA       | NA       | SJC_S000085 | NA     | NA     | NA | Sjp_0017670.1 | biological regulation                         | 0.76396  |

|             |         |          |          |             |        |        |    |               |                           |          |
|-------------|---------|----------|----------|-------------|--------|--------|----|---------------|---------------------------|----------|
| unknown     | NA      | NA       | NA       | SJC_S000085 | NA     | NA     | NA | Sjp_0017680.1 | binding                   | 0.052762 |
| unknown     | NA      | NA       | NA       | SJC_S000085 | NA     | NA     | NA | Sjp_0017690.1 | binding                   | 0.052762 |
| unknown     | NA      | NA       | NA       | SJC_S000085 | NA     | NA     | NA | Sjp_0017700.1 | binding                   | 0.052762 |
| unknown     | NA      | NA       | NA       | SJC_S000086 | NA     | NA     | NA | Sjp_0017710.1 | binding                   | 0.052762 |
| unknown     | NA      | NA       | NA       | SJC_S000086 | NA     | NA     | NA | Sjp_0017720.1 | catalytic activity        | 0.035844 |
| unknown     | NA      | NA       | NA       | SJC_S000086 | NA     | NA     | NA | Sjp_0017730.1 | NA                        | NA       |
| unknown     | NA      | NA       | NA       | SJC_S000086 | NA     | NA     | NA | Sjp_0017740.1 | NA                        | NA       |
| unknown     | NA      | NA       | NA       | SJC_S000086 | NA     | NA     | NA | Sjp_0017750.1 | response to stimulus      | NA       |
| unknown     | NA      | NA       | NA       | SJC_S000086 | NA     | NA     | NA | Sjp_0017760.1 | response to stimulus      | NA       |
| unknown     | NA      | NA       | NA       | SJC_S000086 | NA     | NA     | NA | Sjp_0017770.1 | response to stimulus      | NA       |
| unknown     | NA      | NA       | NA       | SJC_S000086 | NA     | NA     | NA | Sjp_0017780.1 | NA                        | NA       |
| unknown     | NA      | NA       | NA       | SJC_S000086 | NA     | NA     | NA | Sjp_0017790.1 | cell part                 | 0.009037 |
| HSB10kb_214 | WZ      | 3560575  | 3622695  | SJC_S000086 | 377653 | 444070 | +  | Sjp_0017800.1 | NA                        | NA       |
| EBR10kb_145 | "WZ,WZ" | NA       | NA       | SJC_S000086 | 444071 | 454535 | NA | Sjp_0017810.1 | catalytic activity        | 0.035844 |
| HSB10kb_215 | WZ      | 3662301  | 3725367  | SJC_S000086 | 454536 | 499354 | -  | Sjp_0017810.1 | catalytic activity        | 0.035844 |
| HSB10kb_215 | WZ      | 3662301  | 3725367  | SJC_S000086 | 454536 | 499354 | -  | Sjp_0017820.1 | NA                        | NA       |
| EBR10kb_146 | "WZ,WZ" | NA       | NA       | SJC_S000086 | 499355 | 514659 | NA | Sjp_0017840.1 | NA                        | NA       |
| EBR10kb_146 | "WZ,WZ" | NA       | NA       | SJC_S000086 | 499355 | 514659 | NA | Sjp_0017850.1 | NA                        | NA       |
| HSB10kb_216 | WZ      | 3776512  | 3793106  | SJC_S000086 | 514660 | 528503 | -  | Sjp_0017850.1 | NA                        | NA       |
| unknown     | NA      | NA       | NA       | SJC_S000087 | NA     | NA     | NA | Sjp_0017860.1 | NA                        | NA       |
| HSB10kb_217 | 3       | 19164653 | 19195672 | SJC_S000087 | 44515  | 82961  | -  | Sjp_0017870.1 | electron carrier activity | NA       |
| HSB10kb_217 | 3       | 19164653 | 19195672 | SJC_S000087 | 44515  | 82961  | -  | Sjp_0017880.1 | NA                        | NA       |
| EBR10kb_147 | "3,3"   | NA       | NA       | SJC_S000087 | 82962  | 164041 | NA | Sjp_0017890.1 | binding                   | 0.052762 |
| EBR10kb_147 | "3,3"   | NA       | NA       | SJC_S000087 | 82962  | 164041 | NA | Sjp_0017900.1 | NA                        | NA       |
| EBR10kb_147 | "3,3"   | NA       | NA       | SJC_S000087 | 82962  | 164041 | NA | Sjp_0017910.1 | NA                        | NA       |
| EBR10kb_147 | "3,3"   | NA       | NA       | SJC_S000087 | 82962  | 164041 | NA | Sjp_0017920.1 | NA                        | NA       |
| HSB10kb_218 | 3       | 18966925 | 19111783 | SJC_S000087 | 164042 | 296031 | +  | Sjp_0017930.1 | catalytic activity        | 0.035844 |
| HSB10kb_218 | 3       | 18966925 | 19111783 | SJC_S000087 | 164042 | 296031 | +  | Sjp_0017940.1 | NA                        | NA       |
| HSB10kb_218 | 3       | 18966925 | 19111783 | SJC_S000087 | 164042 | 296031 | +  | Sjp_0017950.1 | NA                        | NA       |
| HSB10kb_218 | 3       | 18966925 | 19111783 | SJC_S000087 | 164042 | 296031 | +  | Sjp_0017960.1 | NA                        | NA       |

|             |       |          |          |             |        |        |    |               |                       |          |
|-------------|-------|----------|----------|-------------|--------|--------|----|---------------|-----------------------|----------|
| HSB10kb_218 | 3     | 18966925 | 19111783 | SJC_S000087 | 164042 | 296031 | +  | Sjp_0017970.1 | NA                    | NA       |
| EBR10kb_148 | "3,3" | NA       | NA       | SJC_S000087 | 296032 | 314620 | NA | Sjp_0017970.1 | NA                    | NA       |
| EBR10kb_148 | "3,3" | NA       | NA       | SJC_S000087 | 296032 | 314620 | NA | Sjp_0017980.1 | catalytic activity    | 0.035844 |
| HSB10kb_219 | 3     | 18809469 | 18962649 | SJC_S000087 | 314621 | 456265 | -  | Sjp_0017990.1 | NA                    | NA       |
| HSB10kb_219 | 3     | 18809469 | 18962649 | SJC_S000087 | 314621 | 456265 | -  | Sjp_0018000.1 | catalytic activity    | 0.035844 |
| HSB10kb_219 | 3     | 18809469 | 18962649 | SJC_S000087 | 314621 | 456265 | -  | Sjp_0018020.1 | NA                    | NA       |
| unknown     | NA    | NA       | NA       | SJC_S000087 | NA     | NA     | NA | Sjp_0018030.1 | binding               | 0.052762 |
| unknown     | NA    | NA       | NA       | SJC_S000087 | NA     | NA     | NA | Sjp_0018040.1 | NA                    | NA       |
| unknown     | NA    | NA       | NA       | SJC_S000087 | NA     | NA     | NA | Sjp_0018050.1 | NA                    | NA       |
| unknown     | NA    | NA       | NA       | SJC_S000087 | NA     | NA     | NA | Sjp_0018060.1 | binding               | 0.052762 |
| HSB10kb_220 | 6     | 14020380 | 14335094 | SJC_S000088 | 11835  | 353803 | -  | Sjp_0018070.1 | transporter activity  | 0.782    |
| HSB10kb_220 | 6     | 14020380 | 14335094 | SJC_S000088 | 11835  | 353803 | -  | Sjp_0018080.1 | biological regulation | 0.76396  |
| HSB10kb_220 | 6     | 14020380 | 14335094 | SJC_S000088 | 11835  | 353803 | -  | Sjp_0018090.1 | NA                    | NA       |
| HSB10kb_220 | 6     | 14020380 | 14335094 | SJC_S000088 | 11835  | 353803 | -  | Sjp_0018100.1 | NA                    | NA       |
| HSB10kb_220 | 6     | 14020380 | 14335094 | SJC_S000088 | 11835  | 353803 | -  | Sjp_0018110.1 | biological regulation | 0.76396  |
| HSB10kb_220 | 6     | 14020380 | 14335094 | SJC_S000088 | 11835  | 353803 | -  | Sjp_0018120.1 | binding               | 0.052762 |
| HSB10kb_220 | 6     | 14020380 | 14335094 | SJC_S000088 | 11835  | 353803 | -  | Sjp_0018130.1 | cellular process      | 0.63852  |
| HSB10kb_220 | 6     | 14020380 | 14335094 | SJC_S000088 | 11835  | 353803 | -  | Sjp_0018140.1 | NA                    | NA       |
| HSB10kb_220 | 6     | 14020380 | 14335094 | SJC_S000088 | 11835  | 353803 | -  | Sjp_0018150.1 | NA                    | NA       |
| HSB10kb_220 | 6     | 14020380 | 14335094 | SJC_S000088 | 11835  | 353803 | -  | Sjp_0018160.1 | NA                    | NA       |
| EBR10kb_149 | "6,6" | NA       | NA       | SJC_S000088 | 353804 | 363630 | NA | NA            | NA                    | NA       |
| HSB10kb_221 | 6     | 18535803 | 18573715 | SJC_S000088 | 363631 | 404616 | +  | Sjp_0018170.1 | NA                    | NA       |
| EBR10kb_150 | "6,6" | NA       | NA       | SJC_S000088 | 404617 | 414344 | NA | NA            | NA                    | NA       |
| HSB10kb_222 | 6     | 13940698 | 13964032 | SJC_S000088 | 414345 | 440239 | -  | Sjp_0018190.1 | NA                    | NA       |
| EBR10kb_151 | "6,6" | NA       | NA       | SJC_S000088 | 440240 | 527671 | NA | Sjp_0018200.1 | NA                    | NA       |
| HSB10kb_223 | 6     | 18735986 | 18790645 | SJC_S000088 | 527672 | 565035 | +  | Sjp_0018210.1 | biological regulation | 0.76396  |
| unknown     | NA    | NA       | NA       | SJC_S000089 | NA     | NA     | NA | Sjp_0018220.1 | NA                    | NA       |
| unknown     | NA    | NA       | NA       | SJC_S000089 | NA     | NA     | NA | Sjp_0018230.1 | NA                    | NA       |
| unknown     | NA    | NA       | NA       | SJC_S000089 | NA     | NA     | NA | Sjp_0018240.1 | NA                    | NA       |
| HSB10kb_224 | 1     | 40589834 | 40602855 | SJC_S000089 | 103894 | 116644 | +  | Sjp_0018250.1 | NA                    | NA       |

|             |       |          |          |             |        |        |    |               |                       |          |
|-------------|-------|----------|----------|-------------|--------|--------|----|---------------|-----------------------|----------|
| EBR10kb_152 | "1,4" | NA       | NA       | SJC_S000089 | 116645 | 136620 | NA | Sjp_0018250.1 | NA                    | NA       |
| EBR10kb_152 | "1,4" | NA       | NA       | SJC_S000089 | 116645 | 136620 | NA | Sjp_0018260.1 | NA                    | NA       |
| HSB10kb_225 | 4     | 31186790 | 31205862 | SJC_S000089 | 136621 | 150623 | +  | Sjp_0018260.1 | NA                    | NA       |
| HSB10kb_225 | 4     | 31186790 | 31205862 | SJC_S000089 | 136621 | 150623 | +  | Sjp_0018270.1 | NA                    | NA       |
| EBR10kb_153 | "4,4" | NA       | NA       | SJC_S000089 | 150624 | 180063 | NA | Sjp_0018270.1 | NA                    | NA       |
| EBR10kb_153 | "4,4" | NA       | NA       | SJC_S000089 | 150624 | 180063 | NA | Sjp_0018280.1 | biological regulation | 0.76396  |
| HSB10kb_226 | 4     | 31354694 | 31468452 | SJC_S000089 | 180064 | 299124 | -  | Sjp_0018280.1 | biological regulation | 0.76396  |
| HSB10kb_226 | 4     | 31354694 | 31468452 | SJC_S000089 | 180064 | 299124 | -  | Sjp_0018290.1 | NA                    | NA       |
| HSB10kb_226 | 4     | 31354694 | 31468452 | SJC_S000089 | 180064 | 299124 | -  | Sjp_0018300.1 | transporter activity  | 0.782    |
| unknown     | NA    | NA       | NA       | SJC_S000089 | NA     | NA     | NA | Sjp_0018310.1 | NA                    | NA       |
| unknown     | NA    | NA       | NA       | SJC_S000090 | NA     | NA     | NA | Sjp_0018320.1 | binding               | 0.052762 |
| unknown     | NA    | NA       | NA       | SJC_S000090 | NA     | NA     | NA | Sjp_0018340.1 | biological regulation | 0.76396  |
| unknown     | NA    | NA       | NA       | SJC_S000090 | NA     | NA     | NA | Sjp_0018350.1 | NA                    | NA       |
| unknown     | NA    | NA       | NA       | SJC_S000090 | NA     | NA     | NA | Sjp_0018360.1 | NA                    | NA       |
| unknown     | NA    | NA       | NA       | SJC_S000090 | NA     | NA     | NA | Sjp_0018370.1 | NA                    | NA       |
| unknown     | NA    | NA       | NA       | SJC_S000090 | NA     | NA     | NA | Sjp_0018380.1 | NA                    | NA       |
| unknown     | NA    | NA       | NA       | SJC_S000090 | NA     | NA     | NA | Sjp_0018390.1 | NA                    | NA       |
| unknown     | NA    | NA       | NA       | SJC_S000090 | NA     | NA     | NA | Sjp_0018400.1 | NA                    | NA       |
| unknown     | NA    | NA       | NA       | SJC_S000090 | NA     | NA     | NA | Sjp_0018410.1 | NA                    | NA       |
| unknown     | NA    | NA       | NA       | SJC_S000090 | NA     | NA     | NA | Sjp_0018420.1 | NA                    | NA       |
| unknown     | NA    | NA       | NA       | SJC_S000090 | NA     | NA     | NA | Sjp_0018430.1 | NA                    | NA       |
| unknown     | NA    | NA       | NA       | SJC_S000090 | NA     | NA     | NA | Sjp_0018440.1 | NA                    | NA       |
| unknown     | NA    | NA       | NA       | SJC_S000090 | NA     | NA     | NA | Sjp_0018450.1 | NA                    | NA       |
| unknown     | NA    | NA       | NA       | SJC_S000090 | NA     | NA     | NA | Sjp_0018460.1 | NA                    | NA       |
| unknown     | NA    | NA       | NA       | SJC_S000090 | NA     | NA     | NA | Sjp_0018470.1 | NA                    | NA       |
| unknown     | NA    | NA       | NA       | SJC_S000091 | NA     | NA     | NA | Sjp_0018480.1 | binding               | 0.052762 |
| unknown     | NA    | NA       | NA       | SJC_S000091 | NA     | NA     | NA | Sjp_0018490.1 | NA                    | NA       |
| unknown     | NA    | NA       | NA       | SJC_S000091 | NA     | NA     | NA | Sjp_0018500.1 | NA                    | NA       |
| unknown     | NA    | NA       | NA       | SJC_S000091 | NA     | NA     | NA | Sjp_0018510.1 | NA                    | NA       |
| unknown     | NA    | NA       | NA       | SJC_S000091 | NA     | NA     | NA | Sjp_0018520.1 | NA                    | NA       |

|             |       |          |          |             |        |        |    |               |                               |          |
|-------------|-------|----------|----------|-------------|--------|--------|----|---------------|-------------------------------|----------|
| unknown     | NA    | NA       | NA       | SJC_S000091 | NA     | NA     | NA | Sjp_0018530.1 | transporter activity          | 0.782    |
| unknown     | NA    | NA       | NA       | SJC_S000091 | NA     | NA     | NA | Sjp_0018540.1 | NA                            | NA       |
| unknown     | NA    | NA       | NA       | SJC_S000091 | NA     | NA     | NA | Sjp_0018550.1 | NA                            | NA       |
| unknown     | NA    | NA       | NA       | SJC_S000091 | NA     | NA     | NA | Sjp_0018560.1 | NA                            | NA       |
| unknown     | NA    | NA       | NA       | SJC_S000091 | NA     | NA     | NA | Sjp_0018570.1 | cell part                     | 0.009037 |
| unknown     | NA    | NA       | NA       | SJC_S000091 | NA     | NA     | NA | Sjp_0018580.1 | NA                            | NA       |
| unknown     | NA    | NA       | NA       | SJC_S000091 | NA     | NA     | NA | Sjp_0018590.1 | catalytic activity            | 0.035844 |
| unknown     | NA    | NA       | NA       | SJC_S000091 | NA     | NA     | NA | Sjp_0018600.1 | catalytic activity            | 0.035844 |
| unknown     | NA    | NA       | NA       | SJC_S000091 | NA     | NA     | NA | Sjp_0018610.1 | molecular transducer activity | 0.50162  |
| unknown     | NA    | NA       | NA       | SJC_S000091 | NA     | NA     | NA | Sjp_0018620.1 | NA                            | NA       |
| unknown     | NA    | NA       | NA       | SJC_S000091 | NA     | NA     | NA | Sjp_0018630.1 | NA                            | NA       |
| unknown     | NA    | NA       | NA       | SJC_S000091 | NA     | NA     | NA | Sjp_0018640.1 | NA                            | NA       |
| unknown     | NA    | NA       | NA       | SJC_S000092 | NA     | NA     | NA | Sjp_0018650.1 | binding                       | 0.052762 |
| unknown     | NA    | NA       | NA       | SJC_S000092 | NA     | NA     | NA | Sjp_0018660.1 | NA                            | NA       |
| unknown     | NA    | NA       | NA       | SJC_S000092 | NA     | NA     | NA | Sjp_0018670.1 | NA                            | NA       |
| unknown     | NA    | NA       | NA       | SJC_S000092 | NA     | NA     | NA | Sjp_0018680.1 | cellular process              | 0.63852  |
| unknown     | NA    | NA       | NA       | SJC_S000092 | NA     | NA     | NA | Sjp_0018690.1 | NA                            | NA       |
| unknown     | NA    | NA       | NA       | SJC_S000092 | NA     | NA     | NA | Sjp_0018700.1 | binding                       | 0.052762 |
| unknown     | NA    | NA       | NA       | SJC_S000092 | NA     | NA     | NA | Sjp_0018710.1 | NA                            | NA       |
| unknown     | NA    | NA       | NA       | SJC_S000092 | NA     | NA     | NA | Sjp_0018720.1 | NA                            | NA       |
| unknown     | NA    | NA       | NA       | SJC_S000092 | NA     | NA     | NA | Sjp_0018730.1 | NA                            | NA       |
| unknown     | NA    | NA       | NA       | SJC_S000092 | NA     | NA     | NA | Sjp_0018740.1 | NA                            | NA       |
| HSB10kb_227 | 2     | 25199020 | 25325564 | SJC_S000093 | 1753   | 136492 | +  | Sjp_0018750.1 | NA                            | NA       |
| HSB10kb_227 | 2     | 25199020 | 25325564 | SJC_S000093 | 1753   | 136492 | +  | Sjp_0018770.1 | NA                            | NA       |
| EBR10kb_154 | "2,2" | NA       | NA       | SJC_S000093 | 136493 | 251167 | NA | Sjp_0018770.1 | NA                            | NA       |
| EBR10kb_154 | "2,2" | NA       | NA       | SJC_S000093 | 136493 | 251167 | NA | Sjp_0018780.1 | NA                            | NA       |
| HSB10kb_228 | 2     | 25418912 | 25554944 | SJC_S000093 | 251168 | 307722 | +  | Sjp_0018790.1 | NA                            | NA       |
| HSB10kb_228 | 2     | 25418912 | 25554944 | SJC_S000093 | 251168 | 307722 | +  | Sjp_0018800.1 | NA                            | NA       |
| unknown     | NA    | NA       | NA       | SJC_S000093 | NA     | NA     | NA | Sjp_0018810.1 | NA                            | NA       |
| unknown     | NA    | NA       | NA       | SJC_S000093 | NA     | NA     | NA | Sjp_0018820.1 | NA                            | NA       |
| HSB10kb_229 | WZ    | 8082076  | 8156740  | SJC_S000094 | 8037   | 105125 | +  | Sjp_0018830.1 | cell part                     | 0.009037 |

|             |    |          |          |             |        |        |    |               |                               |          |
|-------------|----|----------|----------|-------------|--------|--------|----|---------------|-------------------------------|----------|
| HSB10kb_229 | WZ | 8082076  | 8156740  | SJC_S000094 | 8037   | 105125 | +  | Sjp_0018840.1 | molecular transducer activity | 0.50162  |
| HSB10kb_229 | WZ | 8082076  | 8156740  | SJC_S000094 | 8037   | 105125 | +  | Sjp_0018850.1 | cell part                     | 0.009037 |
| HSB10kb_229 | WZ | 8082076  | 8156740  | SJC_S000094 | 8037   | 105125 | +  | Sjp_0018860.1 | NA                            | NA       |
| HSB10kb_229 | WZ | 8082076  | 8156740  | SJC_S000094 | 8037   | 105125 | +  | Sjp_0018870.1 | catalytic activity            | 0.035844 |
| unknown     | NA | NA       | NA       | SJC_S000094 | NA     | NA     | NA | Sjp_0018880.1 | establishment of localization | NA       |
| unknown     | NA | NA       | NA       | SJC_S000094 | NA     | NA     | NA | Sjp_0018890.1 | NA                            | NA       |
| unknown     | NA | NA       | NA       | SJC_S000096 | NA     | NA     | NA | Sjp_0018900.1 | enzyme regulator activity     | 0.1755   |
| unknown     | NA | NA       | NA       | SJC_S000096 | NA     | NA     | NA | Sjp_0018910.1 | NA                            | NA       |
| unknown     | NA | NA       | NA       | SJC_S000096 | NA     | NA     | NA | Sjp_0018920.1 | NA                            | NA       |
| HSB10kb_230 | 1  | 62996533 | 63287564 | SJC_S000096 | 154587 | 431831 | +  | Sjp_0018930.1 | NA                            | NA       |
| HSB10kb_230 | 1  | 62996533 | 63287564 | SJC_S000096 | 154587 | 431831 | +  | Sjp_0018940.1 | NA                            | NA       |
| HSB10kb_230 | 1  | 62996533 | 63287564 | SJC_S000096 | 154587 | 431831 | +  | Sjp_0018950.1 | NA                            | NA       |
| HSB10kb_230 | 1  | 62996533 | 63287564 | SJC_S000096 | 154587 | 431831 | +  | Sjp_0018960.1 | NA                            | NA       |
| HSB10kb_230 | 1  | 62996533 | 63287564 | SJC_S000096 | 154587 | 431831 | +  | Sjp_0018970.1 | NA                            | NA       |
| HSB10kb_230 | 1  | 62996533 | 63287564 | SJC_S000096 | 154587 | 431831 | +  | Sjp_0018980.1 | NA                            | NA       |
| HSB10kb_230 | 1  | 62996533 | 63287564 | SJC_S000096 | 154587 | 431831 | +  | Sjp_0018990.1 | catalytic activity            | 0.035844 |
| HSB10kb_230 | 1  | 62996533 | 63287564 | SJC_S000096 | 154587 | 431831 | +  | Sjp_0019000.1 | NA                            | NA       |
| HSB10kb_230 | 1  | 62996533 | 63287564 | SJC_S000096 | 154587 | 431831 | +  | Sjp_0019010.1 | NA                            | NA       |
| HSB10kb_230 | 1  | 62996533 | 63287564 | SJC_S000096 | 154587 | 431831 | +  | Sjp_0019020.1 | NA                            | NA       |
| HSB10kb_231 | 4  | 27229153 | 27597382 | SJC_S000097 | 6499   | 329254 | -  | Sjp_0019030.1 | cellular process              | 0.63852  |
| HSB10kb_231 | 4  | 27229153 | 27597382 | SJC_S000097 | 6499   | 329254 | -  | Sjp_0019040.1 | NA                            | NA       |
| HSB10kb_231 | 4  | 27229153 | 27597382 | SJC_S000097 | 6499   | 329254 | -  | Sjp_0019050.1 | biological regulation         | 0.76396  |
| HSB10kb_231 | 4  | 27229153 | 27597382 | SJC_S000097 | 6499   | 329254 | -  | Sjp_0019060.1 | biological regulation         | 0.76396  |
| HSB10kb_231 | 4  | 27229153 | 27597382 | SJC_S000097 | 6499   | 329254 | -  | Sjp_0019070.1 | metabolic process             | 0.41934  |
| HSB10kb_231 | 4  | 27229153 | 27597382 | SJC_S000097 | 6499   | 329254 | -  | Sjp_0019080.1 | cell part                     | 0.009037 |
| HSB10kb_232 | 1  | 60681330 | 60919397 | SJC_S000098 | 1391   | 268720 | +  | Sjp_0019090.1 | transporter                   | 0.782    |

|             |       |          |          |             |        |        |    |               |                           |          |
|-------------|-------|----------|----------|-------------|--------|--------|----|---------------|---------------------------|----------|
|             |       |          |          |             |        |        |    |               | activity                  |          |
| HSB10kb_232 | 1     | 60681330 | 60919397 | SJC_S000098 | 1391   | 268720 | +  | Sjp_0019100.1 | NA                        | NA       |
| HSB10kb_232 | 1     | 60681330 | 60919397 | SJC_S000098 | 1391   | 268720 | +  | Sjp_0019110.1 | extracellular region part | NA       |
| HSB10kb_232 | 1     | 60681330 | 60919397 | SJC_S000098 | 1391   | 268720 | +  | Sjp_0019120.1 | NA                        | NA       |
| HSB10kb_232 | 1     | 60681330 | 60919397 | SJC_S000098 | 1391   | 268720 | +  | Sjp_0019130.1 | NA                        | NA       |
| HSB10kb_232 | 1     | 60681330 | 60919397 | SJC_S000098 | 1391   | 268720 | +  | Sjp_0019140.1 | binding                   | 0.052762 |
| HSB10kb_232 | 1     | 60681330 | 60919397 | SJC_S000098 | 1391   | 268720 | +  | Sjp_0019150.1 | cell part                 | 0.009037 |
| HSB10kb_232 | 1     | 60681330 | 60919397 | SJC_S000098 | 1391   | 268720 | +  | Sjp_0019160.1 | NA                        | NA       |
| HSB10kb_232 | 1     | 60681330 | 60919397 | SJC_S000098 | 1391   | 268720 | +  | Sjp_0019170.1 | NA                        | NA       |
| HSB10kb_232 | 1     | 60681330 | 60919397 | SJC_S000098 | 1391   | 268720 | +  | Sjp_0019180.1 | NA                        | NA       |
| unknown     | NA    | NA       | NA       | SJC_S000098 | NA     | NA     | NA | Sjp_0019190.1 | NA                        | NA       |
| HSB10kb_233 | 1     | 41585380 | 41608890 | SJC_S000099 | 2351   | 65522  | -  | Sjp_0019200.1 | NA                        | NA       |
| HSB10kb_233 | 1     | 41585380 | 41608890 | SJC_S000099 | 2351   | 65522  | -  | Sjp_0019210.1 | cell part                 | 0.009037 |
| HSB10kb_233 | 1     | 41585380 | 41608890 | SJC_S000099 | 2351   | 65522  | -  | Sjp_0019220.1 | NA                        | NA       |
| EBR10kb_155 | "1,1" | NA       | NA       | SJC_S000099 | 65523  | 75318  | NA | Sjp_0019230.1 | NA                        | NA       |
| HSB10kb_234 | 1     | 41627291 | 41819274 | SJC_S000099 | 75319  | 304726 | +  | Sjp_0019240.1 | NA                        | NA       |
| HSB10kb_234 | 1     | 41627291 | 41819274 | SJC_S000099 | 75319  | 304726 | +  | Sjp_0019250.1 | NA                        | NA       |
| HSB10kb_234 | 1     | 41627291 | 41819274 | SJC_S000099 | 75319  | 304726 | +  | Sjp_0019260.1 | NA                        | NA       |
| HSB10kb_234 | 1     | 41627291 | 41819274 | SJC_S000099 | 75319  | 304726 | +  | Sjp_0019270.1 | NA                        | NA       |
| HSB10kb_234 | 1     | 41627291 | 41819274 | SJC_S000099 | 75319  | 304726 | +  | Sjp_0019280.1 | NA                        | NA       |
| HSB10kb_234 | 1     | 41627291 | 41819274 | SJC_S000099 | 75319  | 304726 | +  | Sjp_0019290.1 | biological regulation     | 0.76396  |
| HSB10kb_234 | 1     | 41627291 | 41819274 | SJC_S000099 | 75319  | 304726 | +  | Sjp_0019300.1 | biological regulation     | 0.76396  |
| EBR10kb_156 | "1,1" | NA       | NA       | SJC_S000099 | 304727 | 357022 | NA | Sjp_0019310.1 | NA                        | NA       |
| EBR10kb_156 | "1,1" | NA       | NA       | SJC_S000099 | 304727 | 357022 | NA | Sjp_0019320.1 | NA                        | NA       |
| EBR10kb_156 | "1,1" | NA       | NA       | SJC_S000099 | 304727 | 357022 | NA | Sjp_0019330.1 | NA                        | NA       |
| EBR10kb_156 | "1,1" | NA       | NA       | SJC_S000099 | 304727 | 357022 | NA | Sjp_0019340.1 | catalytic activity        | 0.035844 |
| HSB10kb_235 | 1     | 41892088 | 41919197 | SJC_S000099 | 357023 | 382795 | -  | Sjp_0019340.1 | catalytic activity        | 0.035844 |
| HSB10kb_235 | 1     | 41892088 | 41919197 | SJC_S000099 | 357023 | 382795 | -  | Sjp_0019350.1 | catalytic activity        | 0.035844 |
| HSB10kb_235 | 1     | 41892088 | 41919197 | SJC_S000099 | 357023 | 382795 | -  | Sjp_0019360.1 | NA                        | NA       |
| HSB10kb_236 | 2     | 33915143 | 34106736 | SJC_S000100 | 63179  | 226591 | +  | Sjp_0019370.1 | biological regulation     | 0.76396  |

|             |         |          |          |             |        |        |    |               |                           |          |
|-------------|---------|----------|----------|-------------|--------|--------|----|---------------|---------------------------|----------|
| HSB10kb_236 | 2       | 33915143 | 34106736 | SJC_S000100 | 63179  | 226591 | +  | Sjp_0019390.1 | NA                        | NA       |
| HSB10kb_236 | 2       | 33915143 | 34106736 | SJC_S000100 | 63179  | 226591 | +  | Sjp_0019400.1 | catalytic activity        | 0.035844 |
| HSB10kb_236 | 2       | 33915143 | 34106736 | SJC_S000100 | 63179  | 226591 | +  | Sjp_0019410.1 | NA                        | NA       |
| HSB10kb_236 | 2       | 33915143 | 34106736 | SJC_S000100 | 63179  | 226591 | +  | Sjp_0019420.1 | NA                        | NA       |
| unknown     | NA      | NA       | NA       | SJC_S000101 | NA     | NA     | NA | Sjp_0019430.1 | NA                        | NA       |
| unknown     | NA      | NA       | NA       | SJC_S000101 | NA     | NA     | NA | Sjp_0019440.1 | biological regulation     | 0.76396  |
| HSB10kb_237 | WZ      | 39634879 | 39662330 | SJC_S000101 | 88126  | 123414 | -  | Sjp_0019450.1 | NA                        | NA       |
| EBR10kb_157 | "WZ,WZ" | NA       | NA       | SJC_S000101 | 123415 | 131964 | NA | Sjp_0019460.1 | NA                        | NA       |
| HSB10kb_238 | WZ      | 38277437 | 38339714 | SJC_S000101 | 131965 | 191978 | -  | Sjp_0019460.1 | NA                        | NA       |
| HSB10kb_239 | 4       | 31494741 | 31672583 | SJC_S000102 | 1      | 182486 | -  | Sjp_0019470.1 | binding                   | 0.052762 |
| HSB10kb_239 | 4       | 31494741 | 31672583 | SJC_S000102 | 1      | 182486 | -  | Sjp_0019480.1 | cell part                 | 0.009037 |
| HSB10kb_239 | 4       | 31494741 | 31672583 | SJC_S000102 | 1      | 182486 | -  | Sjp_0019490.1 | NA                        | NA       |
| HSB10kb_239 | 4       | 31494741 | 31672583 | SJC_S000102 | 1      | 182486 | -  | Sjp_0019500.1 | NA                        | NA       |
| HSB10kb_239 | 4       | 31494741 | 31672583 | SJC_S000102 | 1      | 182486 | -  | Sjp_0019510.1 | NA                        | NA       |
| HSB10kb_239 | 4       | 31494741 | 31672583 | SJC_S000102 | 1      | 182486 | -  | Sjp_0019520.1 | catalytic activity        | 0.035844 |
| HSB10kb_239 | 4       | 31494741 | 31672583 | SJC_S000102 | 1      | 182486 | -  | Sjp_0019530.1 | catalytic activity        | 0.035844 |
| HSB10kb_239 | 4       | 31494741 | 31672583 | SJC_S000102 | 1      | 182486 | -  | Sjp_0019540.1 | NA                        | NA       |
| EBR10kb_158 | "4,1"   | NA       | NA       | SJC_S000102 | 182487 | 203043 | NA | Sjp_0019550.1 | NA                        | NA       |
| HSB10kb_240 | 1       | 31404860 | 31426660 | SJC_S000102 | 203044 | 230771 | +  | Sjp_0019550.1 | NA                        | NA       |
| EBR10kb_159 | "1,5"   | NA       | NA       | SJC_S000102 | 230772 | 240586 | NA | Sjp_0019550.1 | NA                        | NA       |
| HSB10kb_241 | 5       | 1904641  | 2004428  | SJC_S000102 | 240587 | 266972 | +  | Sjp_0019560.1 | NA                        | NA       |
| EBR10kb_160 | "5,5"   | NA       | NA       | SJC_S000102 | 266973 | 285427 | NA | Sjp_0019570.1 | enzyme regulator activity | 0.1755   |
| EBR10kb_160 | "5,5"   | NA       | NA       | SJC_S000102 | 266973 | 285427 | NA | Sjp_0019580.1 | enzyme regulator activity | 0.1755   |
| HSB10kb_242 | 5       | 2016725  | 2070125  | SJC_S000102 | 285428 | 323472 | -  | Sjp_0019580.1 | enzyme regulator activity | 0.1755   |
| EBR10kb_161 | "5,5"   | NA       | NA       | SJC_S000102 | 323473 | 325650 | NA | NA            | NA                        | NA       |
| HSB10kb_243 | 5       | 1982376  | 2002621  | SJC_S000102 | 325651 | 364731 |    | NA            | NA                        | NA       |
| unknown     | NA      | NA       | NA       | SJC_S000103 | NA     | NA     | NA | Sjp_0019590.1 | NA                        | NA       |



|             |       |          |          |             |        |        |    |               |                       |          |
|-------------|-------|----------|----------|-------------|--------|--------|----|---------------|-----------------------|----------|
| HSB10kb_244 | 2     | 16409295 | 16531387 | SJC_S000104 | 30838  | 144320 | -  | Sjp_0019600.1 | NA                    | NA       |
| HSB10kb_244 | 2     | 16409295 | 16531387 | SJC_S000104 | 30838  | 144320 | -  | Sjp_0019610.1 | NA                    | NA       |
| HSB10kb_244 | 2     | 16409295 | 16531387 | SJC_S000104 | 30838  | 144320 | -  | Sjp_0019620.1 | NA                    | NA       |
| HSB10kb_244 | 2     | 16409295 | 16531387 | SJC_S000104 | 30838  | 144320 | -  | Sjp_0019630.1 | cell part             | 0.009037 |
| HSB10kb_244 | 2     | 16409295 | 16531387 | SJC_S000104 | 30838  | 144320 | -  | Sjp_0019650.1 | catalytic activity    | 0.035844 |
| HSB10kb_244 | 2     | 16409295 | 16531387 | SJC_S000104 | 30838  | 144320 | -  | Sjp_0019660.1 | catalytic activity    | 0.035844 |
| EBR10kb_162 | "2,2" | NA       | NA       | SJC_S000104 | 144321 | 160953 | NA | Sjp_0019670.1 | NA                    | NA       |
| HSB10kb_245 | 2     | 16215788 | 16342066 | SJC_S000104 | 160954 | 305358 | +  | Sjp_0019680.1 | NA                    | NA       |
| HSB10kb_245 | 2     | 16215788 | 16342066 | SJC_S000104 | 160954 | 305358 | +  | Sjp_0019690.1 | NA                    | NA       |
| HSB10kb_245 | 2     | 16215788 | 16342066 | SJC_S000104 | 160954 | 305358 | +  | Sjp_0019700.1 | metabolic process     | 0.41934  |
| HSB10kb_245 | 2     | 16215788 | 16342066 | SJC_S000104 | 160954 | 305358 | +  | Sjp_0019720.1 | binding               | 0.052762 |
| EBR10kb_163 | "2,7" | NA       | NA       | SJC_S000104 | 305359 | 311614 | NA | Sjp_0019720.1 | binding               | 0.052762 |
| HSB10kb_246 | 7     | 7004310  | 7018016  | SJC_S000104 | 311615 | 322861 | +  | Sjp_0019720.1 | binding               | 0.052762 |
| EBR10kb_164 | "7,2" | NA       | NA       | SJC_S000104 | 322862 | 370899 | NA | Sjp_0019720.1 | binding               | 0.052762 |
| EBR10kb_164 | "7,2" | NA       | NA       | SJC_S000104 | 322862 | 370899 | NA | Sjp_0019730.1 | biological regulation | 0.76396  |
| EBR10kb_164 | "7,2" | NA       | NA       | SJC_S000104 | 322862 | 370899 | NA | Sjp_0019740.1 | cellular process      | 0.63852  |
| HSB10kb_247 | 2     | 9375302  | 9391138  | SJC_S000104 | 370900 | 387125 | +  | Sjp_0019740.1 | cellular process      | 0.63852  |
| HSB10kb_247 | 2     | 9375302  | 9391138  | SJC_S000104 | 370900 | 387125 | +  | Sjp_0019750.1 | cell part             | 0.009037 |
| unknown     | NA    | NA       | NA       | SJC_S000105 | NA     | NA     | NA | Sjp_0019760.1 | transporter activity  | 0.782    |
| unknown     | NA    | NA       | NA       | SJC_S000105 | NA     | NA     | NA | Sjp_0019770.1 | binding               | 0.052762 |
| unknown     | NA    | NA       | NA       | SJC_S000105 | NA     | NA     | NA | Sjp_0019780.1 | binding               | 0.052762 |
| unknown     | NA    | NA       | NA       | SJC_S000105 | NA     | NA     | NA | Sjp_0019790.1 | transporter activity  | 0.782    |
| unknown     | NA    | NA       | NA       | SJC_S000105 | NA     | NA     | NA | Sjp_0019800.1 | NA                    | NA       |
| unknown     | NA    | NA       | NA       | SJC_S000105 | NA     | NA     | NA | Sjp_0019810.1 | NA                    | NA       |
| unknown     | NA    | NA       | NA       | SJC_S000105 | NA     | NA     | NA | Sjp_0019820.1 | biological regulation | 0.76396  |
| unknown     | NA    | NA       | NA       | SJC_S000105 | NA     | NA     | NA | Sjp_0019830.1 | NA                    | NA       |
| unknown     | NA    | NA       | NA       | SJC_S000105 | NA     | NA     | NA | Sjp_0019840.1 | NA                    | NA       |
| unknown     | NA    | NA       | NA       | SJC_S000105 | NA     | NA     | NA | Sjp_0019850.1 | catalytic activity    | 0.035844 |
| unknown     | NA    | NA       | NA       | SJC_S000105 | NA     | NA     | NA | Sjp_0019860.1 | NA                    | NA       |

|             |    |          |          |             |        |        |    |               |                                  |          |
|-------------|----|----------|----------|-------------|--------|--------|----|---------------|----------------------------------|----------|
| HSB10kb_248 | 2  | 15778523 | 15804460 | SJC_S000105 | 399907 | 429989 | -  | Sjp_0019870.1 | NA                               | NA       |
| HSB10kb_248 | 2  | 15778523 | 15804460 | SJC_S000105 | 399907 | 429989 | -  | Sjp_0019880.1 | developmental process            | NA       |
| unknown     | NA | NA       | NA       | SJC_S000105 | NA     | NA     | NA | Sjp_0019890.1 | NA                               | NA       |
| unknown     | NA | NA       | NA       | SJC_S000106 | NA     | NA     | NA | Sjp_0019900.1 | NA                               | NA       |
| unknown     | NA | NA       | NA       | SJC_S000106 | NA     | NA     | NA | Sjp_0019910.1 | NA                               | NA       |
| unknown     | NA | NA       | NA       | SJC_S000106 | NA     | NA     | NA | Sjp_0019920.1 | transporter activity             | 0.782    |
| unknown     | NA | NA       | NA       | SJC_S000106 | NA     | NA     | NA | Sjp_0019930.1 | NA                               | NA       |
| unknown     | NA | NA       | NA       | SJC_S000106 | NA     | NA     | NA | Sjp_0019940.1 | NA                               | NA       |
| unknown     | NA | NA       | NA       | SJC_S000106 | NA     | NA     | NA | Sjp_0019950.1 | NA                               | NA       |
| unknown     | NA | NA       | NA       | SJC_S000106 | NA     | NA     | NA | Sjp_0019960.1 | NA                               | NA       |
| unknown     | NA | NA       | NA       | SJC_S000106 | NA     | NA     | NA | Sjp_0019970.1 | NA                               | NA       |
| unknown     | NA | NA       | NA       | SJC_S000106 | NA     | NA     | NA | Sjp_0019980.1 | NA                               | NA       |
| unknown     | NA | NA       | NA       | SJC_S000106 | NA     | NA     | NA | Sjp_0019990.1 | establishment of localization    | NA       |
| unknown     | NA | NA       | NA       | SJC_S000106 | NA     | NA     | NA | Sjp_0020000.1 | NA                               | NA       |
| unknown     | NA | NA       | NA       | SJC_S000106 | NA     | NA     | NA | Sjp_0020010.1 | binding                          | 0.052762 |
| unknown     | NA | NA       | NA       | SJC_S000107 | NA     | NA     | NA | Sjp_0020020.1 | NA                               | NA       |
| unknown     | NA | NA       | NA       | SJC_S000107 | NA     | NA     | NA | Sjp_0020040.1 | biological regulation            | 0.76396  |
| unknown     | NA | NA       | NA       | SJC_S000107 | NA     | NA     | NA | Sjp_0020050.1 | transporter activity             | 0.782    |
| unknown     | NA | NA       | NA       | SJC_S000107 | NA     | NA     | NA | Sjp_0020060.1 | catalytic activity               | 0.035844 |
| unknown     | NA | NA       | NA       | SJC_S000107 | NA     | NA     | NA | Sjp_0020070.1 | NA                               | NA       |
| unknown     | NA | NA       | NA       | SJC_S000107 | NA     | NA     | NA | Sjp_0020080.1 | NA                               | NA       |
| unknown     | NA | NA       | NA       | SJC_S000107 | NA     | NA     | NA | Sjp_0020090.1 | cellular process                 | 0.63852  |
| unknown     | NA | NA       | NA       | SJC_S000107 | NA     | NA     | NA | Sjp_0020100.1 | multicellular organismal process | NA       |
| unknown     | NA | NA       | NA       | SJC_S000107 | NA     | NA     | NA | Sjp_0020110.1 | NA                               | NA       |
| unknown     | NA | NA       | NA       | SJC_S000107 | NA     | NA     | NA | Sjp_0020120.1 | cell part                        | 0.009037 |
| unknown     | NA | NA       | NA       | SJC_S000107 | NA     | NA     | NA | Sjp_0020130.1 | cell part                        | 0.009037 |
| unknown     | NA | NA       | NA       | SJC_S000108 | NA     | NA     | NA | Sjp_0020140.1 | NA                               | NA       |

|             |       |          |          |             |        |        |    |               |                           |          |
|-------------|-------|----------|----------|-------------|--------|--------|----|---------------|---------------------------|----------|
| unknown     | NA    | NA       | NA       | SJC_S000108 | NA     | NA     | NA | Sjp_0020150.1 | NA                        | NA       |
| unknown     | NA    | NA       | NA       | SJC_S000108 | NA     | NA     | NA | Sjp_0020160.1 | NA                        | NA       |
| unknown     | NA    | NA       | NA       | SJC_S000108 | NA     | NA     | NA | Sjp_0020170.1 | NA                        | NA       |
| unknown     | NA    | NA       | NA       | SJC_S000108 | NA     | NA     | NA | Sjp_0020180.1 | NA                        | NA       |
| unknown     | NA    | NA       | NA       | SJC_S000108 | NA     | NA     | NA | Sjp_0020190.1 | NA                        | NA       |
| unknown     | NA    | NA       | NA       | SJC_S000108 | NA     | NA     | NA | Sjp_0020210.1 | binding                   | 0.052762 |
| unknown     | NA    | NA       | NA       | SJC_S000108 | NA     | NA     | NA | Sjp_0020220.1 | NA                        | NA       |
| unknown     | NA    | NA       | NA       | SJC_S000108 | NA     | NA     | NA | Sjp_0020230.1 | NA                        | NA       |
| HSB10kb_249 | 2     | 515956   | 616233   | SJC_S000109 | 7451   | 121284 | +  | Sjp_0020240.1 | NA                        | NA       |
| HSB10kb_249 | 2     | 515956   | 616233   | SJC_S000109 | 7451   | 121284 | +  | Sjp_0020250.1 | NA                        | NA       |
| HSB10kb_249 | 2     | 515956   | 616233   | SJC_S000109 | 7451   | 121284 | +  | Sjp_0020260.1 | catalytic activity        | 0.035844 |
| EBR10kb_165 | "2,2" | NA       | NA       | SJC_S000109 | 121285 | 194744 | NA | Sjp_0020270.1 | response to stimulus      | NA       |
| EBR10kb_165 | "2,2" | NA       | NA       | SJC_S000109 | 121285 | 194744 | NA | Sjp_0020280.1 | NA                        | NA       |
| EBR10kb_165 | "2,2" | NA       | NA       | SJC_S000109 | 121285 | 194744 | NA | Sjp_0020290.1 | binding                   | 0.052762 |
| EBR10kb_165 | "2,2" | NA       | NA       | SJC_S000109 | 121285 | 194744 | NA | Sjp_0020300.1 | NA                        | NA       |
| HSB10kb_250 | 2     | 459420   | 505505   | SJC_S000109 | 194745 | 239806 | -  | Sjp_0020300.1 | NA                        | NA       |
| HSB10kb_250 | 2     | 459420   | 505505   | SJC_S000109 | 194745 | 239806 | -  | Sjp_0020310.1 | NA                        | NA       |
| EBR10kb_166 | "2,2" | NA       | NA       | SJC_S000109 | 239807 | 311191 | NA | Sjp_0020320.1 | NA                        | NA       |
| HSB10kb_251 | 2     | 388910   | 431104   | SJC_S000109 | 311192 | 349125 | +  | Sjp_0020330.1 | enzyme regulator activity | 0.1755   |
| EBR10kb_167 | "2,2" | NA       | NA       | SJC_S000109 | 349126 | 382046 | NA | Sjp_0020330.1 | enzyme regulator activity | 0.1755   |
| EBR10kb_167 | "2,2" | NA       | NA       | SJC_S000109 | 349126 | 382046 | NA | Sjp_0020340.1 | catalytic activity        | 0.035844 |
| HSB10kb_252 | 2     | 70653    | 158879   | SJC_S000109 | 382047 | 421597 | -  | Sjp_0020340.1 | catalytic activity        | 0.035844 |
| EBR10kb_168 | "2,2" | NA       | NA       | SJC_S000109 | 421598 | 462704 | NA | Sjp_0020340.1 | catalytic activity        | 0.035844 |
| EBR10kb_168 | "2,2" | NA       | NA       | SJC_S000109 | 421598 | 462704 | NA | Sjp_0020350.1 | NA                        | NA       |
| EBR10kb_168 | "2,2" | NA       | NA       | SJC_S000109 | 421598 | 462704 | NA | Sjp_0020360.1 | NA                        | NA       |
| HSB10kb_253 | 2     | 3808895  | 3828100  | SJC_S000109 | 462705 | 473982 | -  | Sjp_0020360.1 | NA                        | NA       |
| HSB10kb_254 | 6     | 19094584 | 19486764 | SJC_S000110 | 9823   | 325802 | -  | Sjp_0020370.1 | NA                        | NA       |
| HSB10kb_254 | 6     | 19094584 | 19486764 | SJC_S000110 | 9823   | 325802 | -  | Sjp_0020380.1 | NA                        | NA       |
| HSB10kb_254 | 6     | 19094584 | 19486764 | SJC_S000110 | 9823   | 325802 | -  | Sjp_0020390.1 | NA                        | NA       |

|             |       |          |          |             |        |        |    |               |                                               |          |
|-------------|-------|----------|----------|-------------|--------|--------|----|---------------|-----------------------------------------------|----------|
| HSB10kb_254 | 6     | 19094584 | 19486764 | SJC_S000110 | 9823   | 325802 | -  | Sjp_0020400.1 | NA                                            | NA       |
| HSB10kb_254 | 6     | 19094584 | 19486764 | SJC_S000110 | 9823   | 325802 | -  | Sjp_0020410.1 | catalytic activity                            | 0.035844 |
| HSB10kb_254 | 6     | 19094584 | 19486764 | SJC_S000110 | 9823   | 325802 | -  | Sjp_0020420.1 | biological regulation                         | 0.76396  |
| HSB10kb_254 | 6     | 19094584 | 19486764 | SJC_S000110 | 9823   | 325802 | -  | Sjp_0020430.1 | NA                                            | NA       |
| HSB10kb_254 | 6     | 19094584 | 19486764 | SJC_S000110 | 9823   | 325802 | -  | Sjp_0020440.1 | NA                                            | NA       |
| HSB10kb_254 | 6     | 19094584 | 19486764 | SJC_S000110 | 9823   | 325802 | -  | Sjp_0020450.1 | biological regulation                         | 0.76396  |
| HSB10kb_254 | 6     | 19094584 | 19486764 | SJC_S000110 | 9823   | 325802 | -  | Sjp_0020460.1 | NA                                            | NA       |
| EBR10kb_169 | "6,6" | NA       | NA       | SJC_S000110 | 325803 | 329870 | NA | NA            | NA                                            | NA       |
| HSB10kb_255 | 6     | 19542421 | 20008689 | SJC_S000110 | 329871 | 452311 | +  | Sjp_0020480.1 | NA                                            | NA       |
| HSB10kb_255 | 6     | 19542421 | 20008689 | SJC_S000110 | 329871 | 452311 | +  | Sjp_0020490.1 | NA                                            | NA       |
| unknown     | NA    | NA       | NA       | SJC_S000110 | NA     | NA     | NA | Sjp_0020500.1 | NA                                            | NA       |
| unknown     | NA    | NA       | NA       | SJC_S000111 | NA     | NA     | NA | Sjp_0020510.1 | NA                                            | NA       |
| HSB10kb_256 | 4     | 5070573  | 5417772  | SJC_S000111 | 71093  | 434916 | +  | Sjp_0020520.1 | NA                                            | NA       |
| HSB10kb_256 | 4     | 5070573  | 5417772  | SJC_S000111 | 71093  | 434916 | +  | Sjp_0020530.1 | NA                                            | NA       |
| HSB10kb_256 | 4     | 5070573  | 5417772  | SJC_S000111 | 71093  | 434916 | +  | Sjp_0020540.1 | catalytic activity                            | 0.035844 |
| HSB10kb_256 | 4     | 5070573  | 5417772  | SJC_S000111 | 71093  | 434916 | +  | Sjp_0020550.1 | cell part                                     | 0.009037 |
| HSB10kb_256 | 4     | 5070573  | 5417772  | SJC_S000111 | 71093  | 434916 | +  | Sjp_0020560.1 | NA                                            | NA       |
| HSB10kb_256 | 4     | 5070573  | 5417772  | SJC_S000111 | 71093  | 434916 | +  | Sjp_0020570.1 | NA                                            | NA       |
| HSB10kb_256 | 4     | 5070573  | 5417772  | SJC_S000111 | 71093  | 434916 | +  | Sjp_0020580.1 | catalytic activity                            | 0.035844 |
| HSB10kb_256 | 4     | 5070573  | 5417772  | SJC_S000111 | 71093  | 434916 | +  | Sjp_0020590.1 | NA                                            | NA       |
| HSB10kb_256 | 4     | 5070573  | 5417772  | SJC_S000111 | 71093  | 434916 | +  | Sjp_0020600.1 | cell part                                     | 0.009037 |
| HSB10kb_256 | 4     | 5070573  | 5417772  | SJC_S000111 | 71093  | 434916 | +  | Sjp_0020610.1 | catalytic activity                            | 0.035844 |
| HSB10kb_257 | 4     | 30541345 | 30623696 | SJC_S000112 | 68     | 46639  | +  | Sjp_0020620.1 | enzyme regulator activity                     | 0.1755   |
| HSB10kb_257 | 4     | 30541345 | 30623696 | SJC_S000112 | 68     | 46639  | +  | Sjp_0020630.1 | cellular component organization or biogenesis | NA       |
| HSB10kb_257 | 4     | 30541345 | 30623696 | SJC_S000112 | 68     | 46639  | +  | Sjp_0020640.1 | catalytic activity                            | 0.035844 |
| EBR10kb_170 | "4,4" | NA       | NA       | SJC_S000112 | 46640  | 85603  | NA | Sjp_0020640.1 | catalytic activity                            | 0.035844 |
| EBR10kb_170 | "4,4" | NA       | NA       | SJC_S000112 | 46640  | 85603  | NA | Sjp_0020650.1 | catalytic activity                            | 0.035844 |

|             |       |          |          |             |        |        |    |               |                           |          |
|-------------|-------|----------|----------|-------------|--------|--------|----|---------------|---------------------------|----------|
| HSB10kb_258 | 4     | 31039666 | 31148067 | SJC_S000112 | 85604  | 269961 | +  | Sjp_0020650.1 | catalytic activity        | 0.035844 |
| HSB10kb_258 | 4     | 31039666 | 31148067 | SJC_S000112 | 85604  | 269961 | +  | Sjp_0020660.1 | NA                        | NA       |
| HSB10kb_258 | 4     | 31039666 | 31148067 | SJC_S000112 | 85604  | 269961 | +  | Sjp_0020670.1 | transporter activity      | 0.782    |
| HSB10kb_258 | 4     | 31039666 | 31148067 | SJC_S000112 | 85604  | 269961 | +  | Sjp_0020680.1 | NA                        | NA       |
| HSB10kb_258 | 4     | 31039666 | 31148067 | SJC_S000112 | 85604  | 269961 | +  | Sjp_0020690.1 | NA                        | NA       |
| HSB10kb_258 | 4     | 31039666 | 31148067 | SJC_S000112 | 85604  | 269961 | +  | Sjp_0020710.1 | cell part                 | 0.009037 |
| HSB10kb_258 | 4     | 31039666 | 31148067 | SJC_S000112 | 85604  | 269961 | +  | Sjp_0020720.1 | catalytic activity        | 0.035844 |
| HSB10kb_258 | 4     | 31039666 | 31148067 | SJC_S000112 | 85604  | 269961 | +  | Sjp_0020730.1 | enzyme regulator activity | 0.1755   |
| HSB10kb_258 | 4     | 31039666 | 31148067 | SJC_S000112 | 85604  | 269961 | +  | Sjp_0020740.1 | NA                        | NA       |
| unknown     | NA    | NA       | NA       | SJC_S000113 | NA     | NA     | NA | Sjp_0020760.1 | NA                        | NA       |
| unknown     | NA    | NA       | NA       | SJC_S000113 | NA     | NA     | NA | Sjp_0020770.1 | NA                        | NA       |
| unknown     | NA    | NA       | NA       | SJC_S000113 | NA     | NA     | NA | Sjp_0020780.1 | catalytic activity        | 0.035844 |
| unknown     | NA    | NA       | NA       | SJC_S000113 | NA     | NA     | NA | Sjp_0020790.1 | NA                        | NA       |
| unknown     | NA    | NA       | NA       | SJC_S000113 | NA     | NA     | NA | Sjp_0020800.1 | cell part                 | 0.009037 |
| unknown     | NA    | NA       | NA       | SJC_S000113 | NA     | NA     | NA | Sjp_0020810.1 | binding                   | 0.052762 |
| unknown     | NA    | NA       | NA       | SJC_S000113 | NA     | NA     | NA | Sjp_0020820.1 | binding                   | 0.052762 |
| unknown     | NA    | NA       | NA       | SJC_S000113 | NA     | NA     | NA | Sjp_0020830.1 | NA                        | NA       |
| unknown     | NA    | NA       | NA       | SJC_S000113 | NA     | NA     | NA | Sjp_0020840.1 | catalytic activity        | 0.035844 |
| unknown     | NA    | NA       | NA       | SJC_S000113 | NA     | NA     | NA | Sjp_0020850.1 | NA                        | NA       |
| HSB10kb_259 | 1     | 48530007 | 48591509 | SJC_S000114 | 10178  | 63488  | -  | Sjp_0020860.1 | NA                        | NA       |
| HSB10kb_259 | 1     | 48530007 | 48591509 | SJC_S000114 | 10178  | 63488  | -  | Sjp_0020870.1 | catalytic activity        | 0.035844 |
| EBR10kb_171 | "1,1" | NA       | NA       | SJC_S000114 | 63489  | 68881  | NA | Sjp_0020870.1 | catalytic activity        | 0.035844 |
| EBR10kb_171 | "1,1" | NA       | NA       | SJC_S000114 | 63489  | 68881  | NA | Sjp_0020880.1 | NA                        | NA       |
| HSB10kb_260 | 1     | 48619881 | 48664466 | SJC_S000114 | 68882  | 98424  | +  | Sjp_0020880.1 | NA                        | NA       |
| HSB10kb_260 | 1     | 48619881 | 48664466 | SJC_S000114 | 68882  | 98424  | +  | Sjp_0020890.1 | NA                        | NA       |
| EBR10kb_172 | "1,1" | NA       | NA       | SJC_S000114 | 98425  | 149762 | NA | Sjp_0020900.1 | NA                        | NA       |
| EBR10kb_172 | "1,1" | NA       | NA       | SJC_S000114 | 98425  | 149762 | NA | Sjp_0020910.1 | NA                        | NA       |
| EBR10kb_172 | "1,1" | NA       | NA       | SJC_S000114 | 98425  | 149762 | NA | Sjp_0020920.1 | NA                        | NA       |
| HSB10kb_261 | 1     | 48692476 | 48722650 | SJC_S000114 | 149763 | 171699 | -  | Sjp_0020920.1 | NA                        | NA       |
| HSB10kb_261 | 1     | 48692476 | 48722650 | SJC_S000114 | 149763 | 171699 | -  | Sjp_0020930.1 | binding                   | 0.052762 |
| EBR10kb_173 | "1,1" | NA       | NA       | SJC_S000114 | 171700 | 182618 | NA | Sjp_0020940.1 | binding                   | 0.052762 |

|             |       |          |          |             |        |        |    |               |                    |          |
|-------------|-------|----------|----------|-------------|--------|--------|----|---------------|--------------------|----------|
| HSB10kb_262 | 1     | 48761176 | 48937239 | SJC_S000114 | 182619 | 377420 | +  | Sjp_0020940.1 | binding            | 0.052762 |
| HSB10kb_262 | 1     | 48761176 | 48937239 | SJC_S000114 | 182619 | 377420 | +  | Sjp_0020950.1 | NA                 | NA       |
| HSB10kb_262 | 1     | 48761176 | 48937239 | SJC_S000114 | 182619 | 377420 | +  | Sjp_0020960.1 | NA                 | NA       |
| HSB10kb_262 | 1     | 48761176 | 48937239 | SJC_S000114 | 182619 | 377420 | +  | Sjp_0020970.1 | NA                 | NA       |
| HSB10kb_262 | 1     | 48761176 | 48937239 | SJC_S000114 | 182619 | 377420 | +  | Sjp_0020980.1 | binding            | 0.052762 |
| HSB10kb_262 | 1     | 48761176 | 48937239 | SJC_S000114 | 182619 | 377420 | +  | Sjp_0020990.1 | NA                 | NA       |
| HSB10kb_262 | 1     | 48761176 | 48937239 | SJC_S000114 | 182619 | 377420 | +  | Sjp_0021000.1 | catalytic activity | 0.035844 |
| EBR10kb_174 | "1,1" | NA       | NA       | SJC_S000114 | 377421 | 416902 | NA | Sjp_0021010.1 | catalytic activity | 0.035844 |
| EBR10kb_174 | "1,1" | NA       | NA       | SJC_S000114 | 377421 | 416902 | NA | Sjp_0021020.1 | cell part          | 0.009037 |
| HSB10kb_263 | 1     | 46540848 | 46962007 | SJC_S000114 | 416903 | 813896 | +  | Sjp_0021030.1 | binding            | 0.052762 |
| HSB10kb_263 | 1     | 46540848 | 46962007 | SJC_S000114 | 416903 | 813896 | +  | Sjp_0021040.1 | NA                 | NA       |
| HSB10kb_263 | 1     | 46540848 | 46962007 | SJC_S000114 | 416903 | 813896 | +  | Sjp_0021050.1 | catalytic activity | 0.035844 |
| HSB10kb_263 | 1     | 46540848 | 46962007 | SJC_S000114 | 416903 | 813896 | +  | Sjp_0021060.1 | catalytic activity | 0.035844 |
| HSB10kb_263 | 1     | 46540848 | 46962007 | SJC_S000114 | 416903 | 813896 | +  | Sjp_0021070.1 | binding            | 0.052762 |
| HSB10kb_263 | 1     | 46540848 | 46962007 | SJC_S000114 | 416903 | 813896 | +  | Sjp_0021090.1 | NA                 | NA       |
| HSB10kb_263 | 1     | 46540848 | 46962007 | SJC_S000114 | 416903 | 813896 | +  | Sjp_0021100.1 | NA                 | NA       |
| HSB10kb_263 | 1     | 46540848 | 46962007 | SJC_S000114 | 416903 | 813896 | +  | Sjp_0021110.1 | NA                 | NA       |
| HSB10kb_263 | 1     | 46540848 | 46962007 | SJC_S000114 | 416903 | 813896 | +  | Sjp_0021120.1 | metabolic process  | 0.41934  |
| HSB10kb_263 | 1     | 46540848 | 46962007 | SJC_S000114 | 416903 | 813896 | +  | Sjp_0021130.1 | NA                 | NA       |
| HSB10kb_263 | 1     | 46540848 | 46962007 | SJC_S000114 | 416903 | 813896 | +  | Sjp_0021140.1 | NA                 | NA       |
| HSB10kb_263 | 1     | 46540848 | 46962007 | SJC_S000114 | 416903 | 813896 | +  | Sjp_0021150.1 | NA                 | NA       |
| HSB10kb_263 | 1     | 46540848 | 46962007 | SJC_S000114 | 416903 | 813896 | +  | Sjp_0021160.1 | NA                 | NA       |
| HSB10kb_263 | 1     | 46540848 | 46962007 | SJC_S000114 | 416903 | 813896 | +  | Sjp_0021170.1 | NA                 | NA       |
| HSB10kb_263 | 1     | 46540848 | 46962007 | SJC_S000114 | 416903 | 813896 | +  | Sjp_0021180.1 | catalytic activity | 0.035844 |
| unknown     | NA    | NA       | NA       | SJC_S000115 | NA     | NA     | NA | Sjp_0021190.1 | NA                 | NA       |
| HSB10kb_264 | 1     | 48191917 | 48220853 | SJC_S000115 | 86506  | 110559 | -  | Sjp_0021200.1 | NA                 | NA       |
| HSB10kb_264 | 1     | 48191917 | 48220853 | SJC_S000115 | 86506  | 110559 | -  | Sjp_0021210.1 | NA                 | NA       |
| HSB10kb_264 | 1     | 48191917 | 48220853 | SJC_S000115 | 86506  | 110559 | -  | Sjp_0021220.1 | NA                 | NA       |
| EBR10kb_175 | "1,1" | NA       | NA       | SJC_S000115 | 110560 | 164400 | NA | Sjp_0021230.1 | NA                 | NA       |
| EBR10kb_175 | "1,1" | NA       | NA       | SJC_S000115 | 110560 | 164400 | NA | Sjp_0021240.1 | NA                 | NA       |
| EBR10kb_175 | "1,1" | NA       | NA       | SJC_S000115 | 110560 | 164400 | NA | Sjp_0021250.1 | NA                 | NA       |
| HSB10kb_265 | 1     | 48997675 | 49231841 | SJC_S000115 | 164401 | 378146 | +  | Sjp_0021260.1 | NA                 | NA       |
| HSB10kb_265 | 1     | 48997675 | 49231841 | SJC_S000115 | 164401 | 378146 | +  | Sjp_0021270.1 | molecular          | 0.50162  |

|             |       |          |          |             |        |        |    |               |                               |          |
|-------------|-------|----------|----------|-------------|--------|--------|----|---------------|-------------------------------|----------|
|             |       |          |          |             |        |        |    |               | transducer activity           |          |
| HSB10kb_265 | 1     | 48997675 | 49231841 | SJC_S000115 | 164401 | 378146 | +  | Sjp_0021280.1 | binding                       | 0.052762 |
| HSB10kb_265 | 1     | 48997675 | 49231841 | SJC_S000115 | 164401 | 378146 | +  | Sjp_0021290.1 | NA                            | NA       |
| HSB10kb_265 | 1     | 48997675 | 49231841 | SJC_S000115 | 164401 | 378146 | +  | Sjp_0021300.1 | NA                            | NA       |
| EBR10kb_176 | "1,1" | NA       | NA       | SJC_S000115 | 378147 | 507628 | NA | Sjp_0021310.1 | NA                            | NA       |
| EBR10kb_176 | "1,1" | NA       | NA       | SJC_S000115 | 378147 | 507628 | NA | Sjp_0021320.1 | biological regulation         | 0.76396  |
| HSB10kb_266 | 1     | 49327354 | 49466256 | SJC_S000115 | 507629 | 625920 | +  | Sjp_0021340.1 | NA                            | NA       |
| HSB10kb_266 | 1     | 49327354 | 49466256 | SJC_S000115 | 507629 | 625920 | +  | Sjp_0021350.1 | catalytic activity            | 0.035844 |
| HSB10kb_266 | 1     | 49327354 | 49466256 | SJC_S000115 | 507629 | 625920 | +  | Sjp_0021360.1 | NA                            | NA       |
| unknown     | NA    | NA       | NA       | SJC_S000116 | NA     | NA     | NA | Sjp_0021370.1 | NA                            | NA       |
| unknown     | NA    | NA       | NA       | SJC_S000116 | NA     | NA     | NA | Sjp_0021380.1 | NA                            | NA       |
| unknown     | NA    | NA       | NA       | SJC_S000116 | NA     | NA     | NA | Sjp_0021390.1 | NA                            | NA       |
| unknown     | NA    | NA       | NA       | SJC_S000116 | NA     | NA     | NA | Sjp_0021400.1 | catalytic activity            | 0.035844 |
| HSB10kb_267 | 3     | 8040815  | 8062964  | SJC_S000116 | 180101 | 198659 | -  | Sjp_0021410.1 | NA                            | NA       |
| HSB10kb_267 | 3     | 8040815  | 8062964  | SJC_S000116 | 180101 | 198659 | -  | Sjp_0021420.1 | NA                            | NA       |
| unknown     | NA    | NA       | NA       | SJC_S000116 | NA     | NA     | NA | Sjp_0021430.1 | cell part                     | 0.009037 |
| unknown     | NA    | NA       | NA       | SJC_S000116 | NA     | NA     | NA | Sjp_0021440.1 | NA                            | NA       |
| unknown     | NA    | NA       | NA       | SJC_S000116 | NA     | NA     | NA | Sjp_0021450.1 | establishment of localization | NA       |
| unknown     | NA    | NA       | NA       | SJC_S000116 | NA     | NA     | NA | Sjp_0021460.1 | NA                            | NA       |
| unknown     | NA    | NA       | NA       | SJC_S000116 | NA     | NA     | NA | Sjp_0021470.1 | transporter activity          | 0.782    |
| unknown     | NA    | NA       | NA       | SJC_S000116 | NA     | NA     | NA | Sjp_0021480.1 | NA                            | NA       |
| unknown     | NA    | NA       | NA       | SJC_S000116 | NA     | NA     | NA | Sjp_0021490.1 | NA                            | NA       |
| unknown     | NA    | NA       | NA       | SJC_S000116 | NA     | NA     | NA | Sjp_0021500.1 | metabolic process             | 0.41934  |
| unknown     | NA    | NA       | NA       | SJC_S000117 | NA     | NA     | NA | Sjp_0021510.1 | catalytic activity            | 0.035844 |
| unknown     | NA    | NA       | NA       | SJC_S000117 | NA     | NA     | NA | Sjp_0021520.1 | catalytic activity            | 0.035844 |
| unknown     | NA    | NA       | NA       | SJC_S000117 | NA     | NA     | NA | Sjp_0021530.1 | binding                       | 0.052762 |
| unknown     | NA    | NA       | NA       | SJC_S000117 | NA     | NA     | NA | Sjp_0021540.1 | developmental process         | NA       |
| HSB10kb_268 | WZ    | 2708242  | 2921593  | SJC_S000117 | 144220 | 406348 | +  | Sjp_0021550.1 | NA                            | NA       |

|             |        |          |          |             |        |        |    |               |                               |          |
|-------------|--------|----------|----------|-------------|--------|--------|----|---------------|-------------------------------|----------|
| HSB10kb_268 | WZ     | 2708242  | 2921593  | SJC_S000117 | 144220 | 406348 | +  | Sjp_0021560.1 | NA                            | NA       |
| HSB10kb_268 | WZ     | 2708242  | 2921593  | SJC_S000117 | 144220 | 406348 | +  | Sjp_0021570.1 | NA                            | NA       |
| HSB10kb_268 | WZ     | 2708242  | 2921593  | SJC_S000117 | 144220 | 406348 | +  | Sjp_0021580.1 | NA                            | NA       |
| HSB10kb_268 | WZ     | 2708242  | 2921593  | SJC_S000117 | 144220 | 406348 | +  | Sjp_0021590.1 | NA                            | NA       |
| HSB10kb_268 | WZ     | 2708242  | 2921593  | SJC_S000117 | 144220 | 406348 | +  | Sjp_0021600.1 | NA                            | NA       |
| HSB10kb_268 | WZ     | 2708242  | 2921593  | SJC_S000117 | 144220 | 406348 | +  | Sjp_0021610.1 | cell part                     | 0.009037 |
| HSB10kb_268 | WZ     | 2708242  | 2921593  | SJC_S000117 | 144220 | 406348 | +  | Sjp_0021620.1 | cell part                     | 0.009037 |
| HSB10kb_269 | 6      | 10424601 | 10893456 | SJC_S000118 | 8927   | 341385 | -  | Sjp_0021630.1 | response to stimulus          | NA       |
| HSB10kb_269 | 6      | 10424601 | 10893456 | SJC_S000118 | 8927   | 341385 | -  | Sjp_0021640.1 | establishment of localization | NA       |
| HSB10kb_269 | 6      | 10424601 | 10893456 | SJC_S000118 | 8927   | 341385 | -  | Sjp_0021650.1 | molecular transducer activity | 0.50162  |
| HSB10kb_269 | 6      | 10424601 | 10893456 | SJC_S000118 | 8927   | 341385 | -  | Sjp_0021660.1 | NA                            | NA       |
| HSB10kb_269 | 6      | 10424601 | 10893456 | SJC_S000118 | 8927   | 341385 | -  | Sjp_0021670.1 | biological regulation         | 0.76396  |
| HSB10kb_269 | 6      | 10424601 | 10893456 | SJC_S000118 | 8927   | 341385 | -  | Sjp_0021680.1 | NA                            | NA       |
| HSB10kb_269 | 6      | 10424601 | 10893456 | SJC_S000118 | 8927   | 341385 | -  | Sjp_0021690.1 | NA                            | NA       |
| HSB10kb_269 | 6      | 10424601 | 10893456 | SJC_S000118 | 8927   | 341385 | -  | Sjp_0021700.1 | NA                            | NA       |
| HSB10kb_269 | 6      | 10424601 | 10893456 | SJC_S000118 | 8927   | 341385 | -  | Sjp_0021710.1 | NA                            | NA       |
| HSB10kb_269 | 6      | 10424601 | 10893456 | SJC_S000118 | 8927   | 341385 | -  | Sjp_0021720.1 | NA                            | NA       |
| HSB10kb_269 | 6      | 10424601 | 10893456 | SJC_S000118 | 8927   | 341385 | -  | Sjp_0021730.1 | NA                            | NA       |
| HSB10kb_269 | 6      | 10424601 | 10893456 | SJC_S000118 | 8927   | 341385 | -  | Sjp_0021740.1 | NA                            | NA       |
| HSB10kb_269 | 6      | 10424601 | 10893456 | SJC_S000118 | 8927   | 341385 | -  | Sjp_0021750.1 | response to stimulus          | NA       |
| HSB10kb_269 | 6      | 10424601 | 10893456 | SJC_S000118 | 8927   | 341385 | -  | Sjp_0021760.1 | transporter activity          | 0.782    |
| HSB10kb_269 | 6      | 10424601 | 10893456 | SJC_S000118 | 8927   | 341385 | -  | Sjp_0021770.1 | biological regulation         | 0.76396  |
| HSB10kb_270 | WZ     | 38642774 | 38685918 | SJC_S000119 | 8063   | 51320  | +  | Sjp_0021780.1 | NA                            | NA       |
| EBR10kb_177 | "WZ,1" | NA       | NA       | SJC_S000119 | 51321  | 60982  | NA | Sjp_0021780.1 | NA                            | NA       |
| EBR10kb_177 | "WZ,1" | NA       | NA       | SJC_S000119 | 51321  | 60982  | NA | Sjp_0021790.1 | biological regulation         | 0.76396  |



|             |       |          |          |             |        |        |    |               |                                               |          |
|-------------|-------|----------|----------|-------------|--------|--------|----|---------------|-----------------------------------------------|----------|
| HSB10kb_271 | 1     | 4338172  | 4493030  | SJC_S000119 | 60983  | 214561 | +  | Sjp_0021790.1 | biological regulation                         | 0.76396  |
| HSB10kb_271 | 1     | 4338172  | 4493030  | SJC_S000119 | 60983  | 214561 | +  | Sjp_0021800.1 | biological regulation                         | 0.76396  |
| HSB10kb_271 | 1     | 4338172  | 4493030  | SJC_S000119 | 60983  | 214561 | +  | Sjp_0021810.1 | catalytic activity                            | 0.035844 |
| HSB10kb_271 | 1     | 4338172  | 4493030  | SJC_S000119 | 60983  | 214561 | +  | Sjp_0021820.1 | NA                                            | NA       |
| EBR10kb_178 | "1,2" | NA       | NA       | SJC_S000119 | 214562 | 252806 | NA | Sjp_0021820.1 | NA                                            | NA       |
| EBR10kb_178 | "1,2" | NA       | NA       | SJC_S000119 | 214562 | 252806 | NA | Sjp_0021830.1 | NA                                            | NA       |
| EBR10kb_178 | "1,2" | NA       | NA       | SJC_S000119 | 214562 | 252806 | NA | Sjp_0021840.1 | NA                                            | NA       |
| HSB10kb_272 | 2     | 29248465 | 29312512 | SJC_S000119 | 252807 | 320279 | -  | Sjp_0021840.1 | NA                                            | NA       |
| HSB10kb_272 | 2     | 29248465 | 29312512 | SJC_S000119 | 252807 | 320279 | -  | Sjp_0021850.1 | NA                                            | NA       |
| HSB10kb_272 | 2     | 29248465 | 29312512 | SJC_S000119 | 252807 | 320279 | -  | Sjp_0021860.1 | cell part                                     | 0.009037 |
| HSB10kb_272 | 2     | 29248465 | 29312512 | SJC_S000119 | 252807 | 320279 | -  | Sjp_0021870.1 | cellular component organization or biogenesis | NA       |
| HSB10kb_272 | 2     | 29248465 | 29312512 | SJC_S000119 | 252807 | 320279 | -  | Sjp_0021880.1 | NA                                            | NA       |
| unknown     | NA    | NA       | NA       | SJC_S000120 | NA     | NA     | NA | Sjp_0021890.1 | NA                                            | NA       |
| unknown     | NA    | NA       | NA       | SJC_S000120 | NA     | NA     | NA | Sjp_0021900.1 | catalytic activity                            | 0.035844 |
| unknown     | NA    | NA       | NA       | SJC_S000120 | NA     | NA     | NA | Sjp_0021910.1 | NA                                            | NA       |
| unknown     | NA    | NA       | NA       | SJC_S000120 | NA     | NA     | NA | Sjp_0021920.1 | catalytic activity                            | 0.035844 |
| unknown     | NA    | NA       | NA       | SJC_S000120 | NA     | NA     | NA | Sjp_0021930.1 | NA                                            | NA       |
| unknown     | NA    | NA       | NA       | SJC_S000120 | NA     | NA     | NA | Sjp_0021940.1 | NA                                            | NA       |
| unknown     | NA    | NA       | NA       | SJC_S000120 | NA     | NA     | NA | Sjp_0021950.1 | cell part                                     | 0.009037 |
| unknown     | NA    | NA       | NA       | SJC_S000120 | NA     | NA     | NA | Sjp_0021960.1 | NA                                            | NA       |
| unknown     | NA    | NA       | NA       | SJC_S000120 | NA     | NA     | NA | Sjp_0021970.1 | cell part                                     | 0.009037 |
| unknown     | NA    | NA       | NA       | SJC_S000120 | NA     | NA     | NA | Sjp_0021980.1 | NA                                            | NA       |
| unknown     | NA    | NA       | NA       | SJC_S000120 | NA     | NA     | NA | Sjp_0021990.1 | binding                                       | 0.052762 |
| HSB10kb_273 | WZ    | 54455950 | 54680943 | SJC_S000120 | 266087 | 467007 | +  | Sjp_0022000.1 | NA                                            | NA       |
| HSB10kb_273 | WZ    | 54455950 | 54680943 | SJC_S000120 | 266087 | 467007 | +  | Sjp_0022010.1 | transcription regulator activity              | NA       |
| HSB10kb_273 | WZ    | 54455950 | 54680943 | SJC_S000120 | 266087 | 467007 | +  | Sjp_0022020.1 | NA                                            | NA       |
| HSB10kb_273 | WZ    | 54455950 | 54680943 | SJC_S000120 | 266087 | 467007 | +  | Sjp_0022030.1 | NA                                            | NA       |

|             |         |          |          |             |        |        |    |               |                                               |          |
|-------------|---------|----------|----------|-------------|--------|--------|----|---------------|-----------------------------------------------|----------|
| HSB10kb_273 | WZ      | 54455950 | 54680943 | SJC_S000120 | 266087 | 467007 | +  | Sjp_0022040.1 | NA                                            | NA       |
| EBR10kb_179 | "WZ,WZ" | NA       | NA       | SJC_S000120 | 467008 | 492773 | NA | Sjp_0022040.1 | NA                                            | NA       |
| EBR10kb_179 | "WZ,WZ" | NA       | NA       | SJC_S000120 | 467008 | 492773 | NA | Sjp_0022050.1 | NA                                            | NA       |
| EBR10kb_179 | "WZ,WZ" | NA       | NA       | SJC_S000120 | 467008 | 492773 | NA | Sjp_0022060.1 | NA                                            | NA       |
| HSB10kb_274 | WZ      | 55298019 | 55350213 | SJC_S000120 | 492774 | 516244 | -  | Sjp_0022060.1 | NA                                            | NA       |
| HSB10kb_274 | WZ      | 55298019 | 55350213 | SJC_S000120 | 492774 | 516244 | -  | Sjp_0022070.1 | NA                                            | NA       |
| unknown     | NA      | NA       | NA       | SJC_S000121 | NA     | NA     | NA | Sjp_0022080.1 | cell part                                     | 0.009037 |
| unknown     | NA      | NA       | NA       | SJC_S000121 | NA     | NA     | NA | Sjp_0022090.1 | NA                                            | NA       |
| unknown     | NA      | NA       | NA       | SJC_S000121 | NA     | NA     | NA | Sjp_0022100.1 | NA                                            | NA       |
| unknown     | NA      | NA       | NA       | SJC_S000121 | NA     | NA     | NA | Sjp_0022110.1 | NA                                            | NA       |
| unknown     | NA      | NA       | NA       | SJC_S000121 | NA     | NA     | NA | Sjp_0022120.1 | NA                                            | NA       |
| unknown     | NA      | NA       | NA       | SJC_S000121 | NA     | NA     | NA | Sjp_0022130.1 | NA                                            | NA       |
| unknown     | NA      | NA       | NA       | SJC_S000121 | NA     | NA     | NA | Sjp_0022140.1 | NA                                            | NA       |
| unknown     | NA      | NA       | NA       | SJC_S000121 | NA     | NA     | NA | Sjp_0022150.1 | NA                                            | NA       |
| unknown     | NA      | NA       | NA       | SJC_S000121 | NA     | NA     | NA | Sjp_0022160.1 | NA                                            | NA       |
| HSB10kb_275 | 6       | 3604679  | 3667852  | SJC_S000122 | 14114  | 66971  | -  | Sjp_0022170.1 | catalytic activity                            | 0.035844 |
| EBR10kb_180 | "6,6"   | NA       | NA       | SJC_S000122 | 66972  | 147299 | NA | NA            | NA                                            | NA       |
| HSB10kb_276 | 6       | 3742220  | 3870860  | SJC_S000122 | 147300 | 281813 | +  | Sjp_0022180.1 | NA                                            | NA       |
| HSB10kb_276 | 6       | 3742220  | 3870860  | SJC_S000122 | 147300 | 281813 | +  | Sjp_0022190.1 | cellular component organization or biogenesis | NA       |
| HSB10kb_276 | 6       | 3742220  | 3870860  | SJC_S000122 | 147300 | 281813 | +  | Sjp_0022200.1 | NA                                            | NA       |
| EBR10kb_181 | "6,6"   | NA       | NA       | SJC_S000122 | 281814 | 330538 | NA | Sjp_0022210.1 | NA                                            | NA       |
| HSB10kb_277 | 6       | 3511000  | 3527772  | SJC_S000122 | 330539 | 365070 | -  | Sjp_0022210.1 | NA                                            | NA       |
| HSB10kb_277 | 6       | 3511000  | 3527772  | SJC_S000122 | 330539 | 365070 | -  | Sjp_0022220.1 | biological regulation                         | 0.76396  |
| unknown     | NA      | NA       | NA       | SJC_S000122 | NA     | NA     | NA | Sjp_0022230.1 | NA                                            | NA       |
| unknown     | NA      | NA       | NA       | SJC_S000122 | NA     | NA     | NA | Sjp_0022240.1 | NA                                            | NA       |
| unknown     | NA      | NA       | NA       | SJC_S000123 | NA     | NA     | NA | Sjp_0022250.1 | NA                                            | NA       |
| HSB10kb_278 | 4       | 2720079  | 2976638  | SJC_S000123 | 25990  | 286471 | -  | Sjp_0022270.1 | binding                                       | 0.052762 |
| HSB10kb_278 | 4       | 2720079  | 2976638  | SJC_S000123 | 25990  | 286471 | -  | Sjp_0022280.1 | catalytic activity                            | 0.035844 |
| HSB10kb_278 | 4       | 2720079  | 2976638  | SJC_S000123 | 25990  | 286471 | -  | Sjp_0022290.1 | NA                                            | NA       |
| HSB10kb_278 | 4       | 2720079  | 2976638  | SJC_S000123 | 25990  | 286471 | -  | Sjp_0022300.1 | NA                                            | NA       |

|             |       |          |          |             |        |        |    |               |                    |          |
|-------------|-------|----------|----------|-------------|--------|--------|----|---------------|--------------------|----------|
| EBR10kb_182 | "4,4" | NA       | NA       | SJC_S000123 | 286472 | 294148 | NA | Sjp_0022310.1 | NA                 | NA       |
| HSB10kb_279 | 4     | 2547395  | 2609888  | SJC_S000123 | 294149 | 360680 | -  | Sjp_0022310.1 | NA                 | NA       |
| HSB10kb_279 | 4     | 2547395  | 2609888  | SJC_S000123 | 294149 | 360680 | -  | Sjp_0022320.1 | NA                 | NA       |
| EBR10kb_183 | "4,4" | NA       | NA       | SJC_S000123 | 360681 | 399184 | NA | NA            | NA                 | NA       |
| HSB10kb_280 | 4     | 2632641  | 2694732  | SJC_S000123 | 399185 | 455856 | -  | Sjp_0022340.1 | NA                 | NA       |
| HSB10kb_280 | 4     | 2632641  | 2694732  | SJC_S000123 | 399185 | 455856 | -  | Sjp_0022350.1 | NA                 | NA       |
| HSB10kb_280 | 4     | 2632641  | 2694732  | SJC_S000123 | 399185 | 455856 | -  | Sjp_0022360.1 | NA                 | NA       |
| HSB10kb_280 | 4     | 2632641  | 2694732  | SJC_S000123 | 399185 | 455856 | -  | Sjp_0022370.1 | NA                 | NA       |
| unknown     | NA    | NA       | NA       | SJC_S000124 | NA     | NA     | NA | Sjp_0022380.1 | NA                 | NA       |
| unknown     | NA    | NA       | NA       | SJC_S000124 | NA     | NA     | NA | Sjp_0022390.1 | NA                 | NA       |
| unknown     | NA    | NA       | NA       | SJC_S000124 | NA     | NA     | NA | Sjp_0022400.1 | NA                 | NA       |
| unknown     | NA    | NA       | NA       | SJC_S000124 | NA     | NA     | NA | Sjp_0022410.1 | NA                 | NA       |
| unknown     | NA    | NA       | NA       | SJC_S000124 | NA     | NA     | NA | Sjp_0022420.1 | NA                 | NA       |
| unknown     | NA    | NA       | NA       | SJC_S000124 | NA     | NA     | NA | Sjp_0022430.1 | NA                 | NA       |
| unknown     | NA    | NA       | NA       | SJC_S000124 | NA     | NA     | NA | Sjp_0022440.1 | binding            | 0.052762 |
| HSB10kb_281 | 1     | 24494385 | 24590320 | SJC_S000124 | 240059 | 333461 | +  | Sjp_0022450.1 | cellular process   | 0.63852  |
| HSB10kb_281 | 1     | 24494385 | 24590320 | SJC_S000124 | 240059 | 333461 | +  | Sjp_0022460.1 | cellular process   | 0.63852  |
| HSB10kb_281 | 1     | 24494385 | 24590320 | SJC_S000124 | 240059 | 333461 | +  | Sjp_0022470.1 | NA                 | NA       |
| HSB10kb_281 | 1     | 24494385 | 24590320 | SJC_S000124 | 240059 | 333461 | +  | Sjp_0022480.1 | cell part          | 0.009037 |
| HSB10kb_281 | 1     | 24494385 | 24590320 | SJC_S000124 | 240059 | 333461 | +  | Sjp_0022490.1 | NA                 | NA       |
| unknown     | NA    | NA       | NA       | SJC_S000124 | NA     | NA     | NA | Sjp_0022500.1 | binding            | 0.052762 |
| unknown     | NA    | NA       | NA       | SJC_S000125 | NA     | NA     | NA | Sjp_0022510.1 | NA                 | NA       |
| unknown     | NA    | NA       | NA       | SJC_S000125 | NA     | NA     | NA | Sjp_0022520.1 | binding            | 0.052762 |
| unknown     | NA    | NA       | NA       | SJC_S000125 | NA     | NA     | NA | Sjp_0022530.1 | NA                 | NA       |
| unknown     | NA    | NA       | NA       | SJC_S000125 | NA     | NA     | NA | Sjp_0022540.1 | cell part          | 0.009037 |
| HSB10kb_282 | 1     | 24377146 | 24400239 | SJC_S000125 | 128214 | 144048 | +  | Sjp_0022550.1 | cell part          | 0.009037 |
| HSB10kb_282 | 1     | 24377146 | 24400239 | SJC_S000125 | 128214 | 144048 | +  | Sjp_0022560.1 | NA                 | NA       |
| EBR10kb_184 | "1,1" | NA       | NA       | SJC_S000125 | 144049 | 164387 | NA | Sjp_0022560.1 | NA                 | NA       |
| EBR10kb_184 | "1,1" | NA       | NA       | SJC_S000125 | 144049 | 164387 | NA | Sjp_0022570.1 | cellular process   | 0.63852  |
| HSB10kb_283 | 1     | 21838445 | 21859790 | SJC_S000125 | 164388 | 183796 | +  | Sjp_0022580.1 | NA                 | NA       |
| EBR10kb_185 | "1,1" | NA       | NA       | SJC_S000125 | 183797 | 215408 | NA | Sjp_0022590.1 | catalytic activity | 0.035844 |
| HSB10kb_284 | 1     | 21739085 | 21770354 | SJC_S000125 | 215409 | 272070 | -  | Sjp_0022590.1 | catalytic activity | 0.035844 |
| HSB10kb_284 | 1     | 21739085 | 21770354 | SJC_S000125 | 215409 | 272070 | -  | Sjp_0022600.1 | binding            | 0.052762 |
| unknown     | NA    | NA       | NA       | SJC_S000126 | NA     | NA     | NA | Sjp_0022610.1 | NA                 | NA       |

|             |       |          |          |             |        |        |    |               |                               |          |
|-------------|-------|----------|----------|-------------|--------|--------|----|---------------|-------------------------------|----------|
| unknown     | NA    | NA       | NA       | SJC_S000126 | NA     | NA     | NA | Sjp_0022620.1 | NA                            | NA       |
| unknown     | NA    | NA       | NA       | SJC_S000126 | NA     | NA     | NA | Sjp_0022630.1 | cell part                     | 0.009037 |
| unknown     | NA    | NA       | NA       | SJC_S000126 | NA     | NA     | NA | Sjp_0022640.1 | NA                            | NA       |
| HSB10kb_285 | 2     | 20650142 | 20949585 | SJC_S000126 | 177056 | 426444 | -  | Sjp_0022650.1 | biological regulation         | 0.76396  |
| HSB10kb_285 | 2     | 20650142 | 20949585 | SJC_S000126 | 177056 | 426444 | -  | Sjp_0022660.1 | NA                            | NA       |
| HSB10kb_285 | 2     | 20650142 | 20949585 | SJC_S000126 | 177056 | 426444 | -  | Sjp_0022670.1 | NA                            | NA       |
| HSB10kb_285 | 2     | 20650142 | 20949585 | SJC_S000126 | 177056 | 426444 | -  | Sjp_0022680.1 | cell part                     | 0.009037 |
| HSB10kb_285 | 2     | 20650142 | 20949585 | SJC_S000126 | 177056 | 426444 | -  | Sjp_0022690.1 | NA                            | NA       |
| HSB10kb_285 | 2     | 20650142 | 20949585 | SJC_S000126 | 177056 | 426444 | -  | Sjp_0022700.1 | binding                       | 0.052762 |
| HSB10kb_285 | 2     | 20650142 | 20949585 | SJC_S000126 | 177056 | 426444 | -  | Sjp_0022710.1 | NA                            | NA       |
| HSB10kb_285 | 2     | 20650142 | 20949585 | SJC_S000126 | 177056 | 426444 | -  | Sjp_0022720.1 | NA                            | NA       |
| HSB10kb_285 | 2     | 20650142 | 20949585 | SJC_S000126 | 177056 | 426444 | -  | Sjp_0022730.1 | biological regulation         | 0.76396  |
| HSB10kb_285 | 2     | 20650142 | 20949585 | SJC_S000126 | 177056 | 426444 | -  | Sjp_0022740.1 | cell part                     | 0.009037 |
| EBR10kb_186 | "2,6" | NA       | NA       | SJC_S000126 | 426445 | 469611 | NA | Sjp_0022740.1 | cell part                     | 0.009037 |
| HSB10kb_286 | 6     | 9564606  | 9588955  | SJC_S000126 | 469612 | 502053 |    | NA            | NA                            | NA       |
| unknown     | NA    | NA       | NA       | SJC_S000127 | NA     | NA     | NA | Sjp_0022750.1 | NA                            | NA       |
| unknown     | NA    | NA       | NA       | SJC_S000127 | NA     | NA     | NA | Sjp_0022760.1 | NA                            | NA       |
| unknown     | NA    | NA       | NA       | SJC_S000127 | NA     | NA     | NA | Sjp_0022770.1 | NA                            | NA       |
| unknown     | NA    | NA       | NA       | SJC_S000128 | NA     | NA     | NA | Sjp_0022780.1 | NA                            | NA       |
| unknown     | NA    | NA       | NA       | SJC_S000128 | NA     | NA     | NA | Sjp_0022790.1 | transporter activity          | 0.782    |
| unknown     | NA    | NA       | NA       | SJC_S000128 | NA     | NA     | NA | Sjp_0022800.1 | NA                            | NA       |
| unknown     | NA    | NA       | NA       | SJC_S000128 | NA     | NA     | NA | Sjp_0022810.1 | NA                            | NA       |
| unknown     | NA    | NA       | NA       | SJC_S000128 | NA     | NA     | NA | Sjp_0022820.1 | NA                            | NA       |
| unknown     | NA    | NA       | NA       | SJC_S000128 | NA     | NA     | NA | Sjp_0022830.1 | NA                            | NA       |
| unknown     | NA    | NA       | NA       | SJC_S000128 | NA     | NA     | NA | Sjp_0022840.1 | establishment of localization | NA       |
| unknown     | NA    | NA       | NA       | SJC_S000128 | NA     | NA     | NA | Sjp_0022850.1 | catalytic activity            | 0.035844 |
| unknown     | NA    | NA       | NA       | SJC_S000128 | NA     | NA     | NA | Sjp_0022870.1 | NA                            | NA       |
| unknown     | NA    | NA       | NA       | SJC_S000128 | NA     | NA     | NA | Sjp_0022880.1 | NA                            | NA       |
| unknown     | NA    | NA       | NA       | SJC_S000128 | NA     | NA     | NA | Sjp_0022890.1 | NA                            | NA       |
| HSB10kb_287 | 1     | 12152875 | 12190832 | SJC_S000129 | 7678   | 47103  | +  | Sjp_0022910.1 | NA                            | NA       |

|             |       |          |          |             |       |       |    |               |                               |          |
|-------------|-------|----------|----------|-------------|-------|-------|----|---------------|-------------------------------|----------|
| HSB10kb_287 | 1     | 12152875 | 12190832 | SJC_S000129 | 7678  | 47103 | +  | Sjp_0022920.1 | molecular transducer activity | 0.50162  |
| EBR10kb_187 | "1,4" | NA       | NA       | SJC_S000129 | 47104 | 54432 | NA | Sjp_0022920.1 | molecular transducer activity | 0.50162  |
| HSB10kb_288 | 4     | 18568238 | 18596922 | SJC_S000129 | 54433 | 70461 | +  | Sjp_0022920.1 | molecular transducer activity | 0.50162  |
| HSB10kb_288 | 4     | 18568238 | 18596922 | SJC_S000129 | 54433 | 70461 | +  | Sjp_0022930.1 | NA                            | NA       |
| unknown     | NA    | NA       | NA       | SJC_S000129 | NA    | NA    | NA | Sjp_0022940.1 | cellular process              | 0.63852  |
| unknown     | NA    | NA       | NA       | SJC_S000129 | NA    | NA    | NA | Sjp_0022950.1 | NA                            | NA       |
| unknown     | NA    | NA       | NA       | SJC_S000130 | NA    | NA    | NA | Sjp_0022970.1 | biological regulation         | 0.76396  |
| unknown     | NA    | NA       | NA       | SJC_S000130 | NA    | NA    | NA | Sjp_0022980.1 | catalytic activity            | 0.035844 |
| unknown     | NA    | NA       | NA       | SJC_S000130 | NA    | NA    | NA | Sjp_0022990.1 | catalytic activity            | 0.035844 |
| unknown     | NA    | NA       | NA       | SJC_S000130 | NA    | NA    | NA | Sjp_0023000.1 | NA                            | NA       |
| unknown     | NA    | NA       | NA       | SJC_S000130 | NA    | NA    | NA | Sjp_0023010.1 | NA                            | NA       |
| unknown     | NA    | NA       | NA       | SJC_S000130 | NA    | NA    | NA | Sjp_0023020.1 | NA                            | NA       |
| unknown     | NA    | NA       | NA       | SJC_S000130 | NA    | NA    | NA | Sjp_0023030.1 | NA                            | NA       |
| unknown     | NA    | NA       | NA       | SJC_S000130 | NA    | NA    | NA | Sjp_0023040.1 | catalytic activity            | 0.035844 |
| unknown     | NA    | NA       | NA       | SJC_S000130 | NA    | NA    | NA | Sjp_0023050.1 | catalytic activity            | 0.035844 |
| unknown     | NA    | NA       | NA       | SJC_S000130 | NA    | NA    | NA | Sjp_0023060.1 | NA                            | NA       |
| unknown     | NA    | NA       | NA       | SJC_S000131 | NA    | NA    | NA | Sjp_0023070.1 | NA                            | NA       |
| unknown     | NA    | NA       | NA       | SJC_S000131 | NA    | NA    | NA | Sjp_0023090.1 | NA                            | NA       |
| unknown     | NA    | NA       | NA       | SJC_S000131 | NA    | NA    | NA | Sjp_0023100.1 | cell part                     | 0.009037 |
| unknown     | NA    | NA       | NA       | SJC_S000131 | NA    | NA    | NA | Sjp_0023110.1 | NA                            | NA       |
| unknown     | NA    | NA       | NA       | SJC_S000131 | NA    | NA    | NA | Sjp_0023120.1 | catalytic activity            | 0.035844 |
| unknown     | NA    | NA       | NA       | SJC_S000131 | NA    | NA    | NA | Sjp_0023130.1 | establishment of localization | NA       |
| unknown     | NA    | NA       | NA       | SJC_S000131 | NA    | NA    | NA | Sjp_0023140.1 | catalytic activity            | 0.035844 |
| unknown     | NA    | NA       | NA       | SJC_S000131 | NA    | NA    | NA | Sjp_0023150.1 | enzyme regulator activity     | 0.1755   |
| unknown     | NA    | NA       | NA       | SJC_S000131 | NA    | NA    | NA | Sjp_0023160.1 | enzyme                        | 0.1755   |

|             |        |          |          |             |        |        |    |               |                           |          |
|-------------|--------|----------|----------|-------------|--------|--------|----|---------------|---------------------------|----------|
|             |        |          |          |             |        |        |    |               | regulator activity        |          |
| unknown     | NA     | NA       | NA       | SJC_S000131 | NA     | NA     | NA | Sjp_0023170.1 | enzyme regulator activity | 0.1755   |
| unknown     | NA     | NA       | NA       | SJC_S000132 | NA     | NA     | NA | Sjp_0023180.1 | NA                        | NA       |
| HSB10kb_289 | 6      | 1188379  | 1485082  | SJC_S000132 | 38645  | 283361 | -  | Sjp_0023190.1 | NA                        | NA       |
| HSB10kb_289 | 6      | 1188379  | 1485082  | SJC_S000132 | 38645  | 283361 | -  | Sjp_0023200.1 | cellular process          | 0.63852  |
| HSB10kb_289 | 6      | 1188379  | 1485082  | SJC_S000132 | 38645  | 283361 | -  | Sjp_0023210.1 | NA                        | NA       |
| HSB10kb_289 | 6      | 1188379  | 1485082  | SJC_S000132 | 38645  | 283361 | -  | Sjp_0023220.1 | catalytic activity        | 0.035844 |
| HSB10kb_289 | 6      | 1188379  | 1485082  | SJC_S000132 | 38645  | 283361 | -  | Sjp_0023230.1 | NA                        | NA       |
| HSB10kb_289 | 6      | 1188379  | 1485082  | SJC_S000132 | 38645  | 283361 | -  | Sjp_0023240.1 | catalytic activity        | 0.035844 |
| HSB10kb_289 | 6      | 1188379  | 1485082  | SJC_S000132 | 38645  | 283361 | -  | Sjp_0023250.1 | catalytic activity        | 0.035844 |
| HSB10kb_289 | 6      | 1188379  | 1485082  | SJC_S000132 | 38645  | 283361 | -  | Sjp_0023260.1 | catalytic activity        | 0.035844 |
| HSB10kb_289 | 6      | 1188379  | 1485082  | SJC_S000132 | 38645  | 283361 | -  | Sjp_0023270.1 | cell part                 | 0.009037 |
| EBR10kb_188 | "6,WZ" | NA       | NA       | SJC_S000132 | 283362 | 297799 | NA | Sjp_0023290.1 | NA                        | NA       |
| HSB10kb_290 | WZ     | 53377382 | 53440450 | SJC_S000132 | 297800 | 323100 | -  | Sjp_0023300.1 | binding                   | 0.052762 |
| EBR10kb_189 | "WZ,6" | NA       | NA       | SJC_S000132 | 323101 | 344186 | NA | Sjp_0023310.1 | catalytic activity        | 0.035844 |
| HSB10kb_291 | 6      | 1048295  | 1062212  | SJC_S000132 | 344187 | 361128 | -  | Sjp_0023310.1 | catalytic activity        | 0.035844 |
| EBR10kb_190 | "6,6"  | NA       | NA       | SJC_S000132 | 361129 | 393517 | NA | Sjp_0023320.1 | binding                   | 0.052762 |
| EBR10kb_190 | "6,6"  | NA       | NA       | SJC_S000132 | 361129 | 393517 | NA | Sjp_0023330.1 | NA                        | NA       |
| HSB10kb_292 | 6      | 1086648  | 1116133  | SJC_S000132 | 393518 | 421557 | -  | Sjp_0023330.1 | NA                        | NA       |
| HSB10kb_292 | 6      | 1086648  | 1116133  | SJC_S000132 | 393518 | 421557 | -  | Sjp_0023340.1 | NA                        | NA       |
| unknown     | NA     | NA       | NA       | SJC_S000132 | NA     | NA     | NA | Sjp_0023350.1 | binding                   | 0.052762 |
| unknown     | NA     | NA       | NA       | SJC_S000133 | NA     | NA     | NA | Sjp_0023360.1 | NA                        | NA       |
| unknown     | NA     | NA       | NA       | SJC_S000133 | NA     | NA     | NA | Sjp_0023370.1 | transporter activity      | 0.782    |
| unknown     | NA     | NA       | NA       | SJC_S000133 | NA     | NA     | NA | Sjp_0023380.1 | binding                   | 0.052762 |
| unknown     | NA     | NA       | NA       | SJC_S000133 | NA     | NA     | NA | Sjp_0023390.1 | transporter activity      | 0.782    |
| unknown     | NA     | NA       | NA       | SJC_S000133 | NA     | NA     | NA | Sjp_0023400.1 | NA                        | NA       |
| unknown     | NA     | NA       | NA       | SJC_S000133 | NA     | NA     | NA | Sjp_0023410.1 | cell part                 | 0.009037 |
| unknown     | NA     | NA       | NA       | SJC_S000133 | NA     | NA     | NA | Sjp_0023420.1 | NA                        | NA       |
| unknown     | NA     | NA       | NA       | SJC_S000133 | NA     | NA     | NA | Sjp_0023430.1 | biological                | 0.76396  |

|             |       |          |          |             |        |        |    |               |                           |          |
|-------------|-------|----------|----------|-------------|--------|--------|----|---------------|---------------------------|----------|
|             |       |          |          |             |        |        |    |               | regulation                |          |
| unknown     | NA    | NA       | NA       | SJC_S000133 | NA     | NA     | NA | Sjp_0023440.1 | NA                        | NA       |
| unknown     | NA    | NA       | NA       | SJC_S000133 | NA     | NA     | NA | Sjp_0023450.1 | catalytic activity        | 0.035844 |
| unknown     | NA    | NA       | NA       | SJC_S000133 | NA     | NA     | NA | Sjp_0023460.1 | catalytic activity        | 0.035844 |
| unknown     | NA    | NA       | NA       | SJC_S000133 | NA     | NA     | NA | Sjp_0023470.1 | NA                        | NA       |
| HSB10kb_293 | 1     | 8459656  | 8608274  | SJC_S000134 | 55826  | 174159 | -  | Sjp_0023480.1 | NA                        | NA       |
| HSB10kb_293 | 1     | 8459656  | 8608274  | SJC_S000134 | 55826  | 174159 | -  | Sjp_0023490.1 | cell part                 | 0.009037 |
| HSB10kb_293 | 1     | 8459656  | 8608274  | SJC_S000134 | 55826  | 174159 | -  | Sjp_0023500.1 | NA                        | NA       |
| HSB10kb_293 | 1     | 8459656  | 8608274  | SJC_S000134 | 55826  | 174159 | -  | Sjp_0023510.1 | NA                        | NA       |
| HSB10kb_293 | 1     | 8459656  | 8608274  | SJC_S000134 | 55826  | 174159 | -  | Sjp_0023520.1 | NA                        | NA       |
| HSB10kb_293 | 1     | 8459656  | 8608274  | SJC_S000134 | 55826  | 174159 | -  | Sjp_0023530.1 | NA                        | NA       |
| HSB10kb_293 | 1     | 8459656  | 8608274  | SJC_S000134 | 55826  | 174159 | -  | Sjp_0023540.1 | cell part                 | 0.009037 |
| EBR10kb_191 | "1,1" | NA       | NA       | SJC_S000134 | 174160 | 249086 | NA | Sjp_0023550.1 | NA                        | NA       |
| EBR10kb_191 | "1,1" | NA       | NA       | SJC_S000134 | 174160 | 249086 | NA | Sjp_0023560.1 | NA                        | NA       |
| EBR10kb_191 | "1,1" | NA       | NA       | SJC_S000134 | 174160 | 249086 | NA | Sjp_0023570.1 | enzyme regulator activity | 0.1755   |
| EBR10kb_191 | "1,1" | NA       | NA       | SJC_S000134 | 174160 | 249086 | NA | Sjp_0023580.1 | NA                        | NA       |
| HSB10kb_294 | 1     | 8199472  | 8349194  | SJC_S000134 | 249087 | 394508 | -  | Sjp_0023580.1 | NA                        | NA       |
| HSB10kb_294 | 1     | 8199472  | 8349194  | SJC_S000134 | 249087 | 394508 | -  | Sjp_0023590.1 | NA                        | NA       |
| HSB10kb_294 | 1     | 8199472  | 8349194  | SJC_S000134 | 249087 | 394508 | -  | Sjp_0023600.1 | NA                        | NA       |
| HSB10kb_294 | 1     | 8199472  | 8349194  | SJC_S000134 | 249087 | 394508 | -  | Sjp_0023610.1 | NA                        | NA       |
| HSB10kb_294 | 1     | 8199472  | 8349194  | SJC_S000134 | 249087 | 394508 | -  | Sjp_0023620.1 | NA                        | NA       |
| HSB10kb_294 | 1     | 8199472  | 8349194  | SJC_S000134 | 249087 | 394508 | -  | Sjp_0023630.1 | NA                        | NA       |
| unknown     | NA    | NA       | NA       | SJC_S000135 | NA     | NA     | NA | Sjp_0023640.1 | NA                        | NA       |
| HSB10kb_295 | 6     | 18906493 | 19054369 | SJC_S000136 | 10660  | 208300 | -  | Sjp_0023650.1 | NA                        | NA       |
| HSB10kb_295 | 6     | 18906493 | 19054369 | SJC_S000136 | 10660  | 208300 | -  | Sjp_0023660.1 | NA                        | NA       |
| HSB10kb_295 | 6     | 18906493 | 19054369 | SJC_S000136 | 10660  | 208300 | -  | Sjp_0023670.1 | NA                        | NA       |
| HSB10kb_295 | 6     | 18906493 | 19054369 | SJC_S000136 | 10660  | 208300 | -  | Sjp_0023680.1 | NA                        | NA       |
| HSB10kb_295 | 6     | 18906493 | 19054369 | SJC_S000136 | 10660  | 208300 | -  | Sjp_0023690.1 | NA                        | NA       |
| HSB10kb_295 | 6     | 18906493 | 19054369 | SJC_S000136 | 10660  | 208300 | -  | Sjp_0023700.1 | metabolic process         | 0.41934  |
| HSB10kb_295 | 6     | 18906493 | 19054369 | SJC_S000136 | 10660  | 208300 | -  | Sjp_0023710.1 | binding                   | 0.052762 |
| HSB10kb_295 | 6     | 18906493 | 19054369 | SJC_S000136 | 10660  | 208300 | -  | Sjp_0023720.1 | NA                        | NA       |

|             |       |          |          |             |        |        |    |               |                                               |          |
|-------------|-------|----------|----------|-------------|--------|--------|----|---------------|-----------------------------------------------|----------|
| EBR10kb_192 | "6,6" | NA       | NA       | SJC_S000136 | 208301 | 246288 | NA | Sjp_0023720.1 | NA                                            | NA       |
| EBR10kb_192 | "6,6" | NA       | NA       | SJC_S000136 | 208301 | 246288 | NA | Sjp_0023730.1 | NA                                            | NA       |
| HSB10kb_296 | 6     | 18811900 | 18829452 | SJC_S000136 | 246289 | 264265 | -  | Sjp_0023740.1 | NA                                            | NA       |
| EBR10kb_193 | "6,6" | NA       | NA       | SJC_S000136 | 264266 | 302510 | NA | Sjp_0023750.1 | macromolecular complex                        | NA       |
| EBR10kb_193 | "6,6" | NA       | NA       | SJC_S000136 | 264266 | 302510 | NA | Sjp_0023760.1 | NA                                            | NA       |
| HSB10kb_297 | 6     | 18846881 | 18867569 | SJC_S000136 | 302511 | 315026 | -  | Sjp_0023760.1 | NA                                            | NA       |
| unknown     | NA    | NA       | NA       | SJC_S000137 | NA     | NA     | NA | Sjp_0023770.1 | NA                                            | NA       |
| HSB10kb_298 | 1     | 25175398 | 25235831 | SJC_S000137 | 42272  | 96178  | +  | Sjp_0023780.1 | cell part                                     | 0.009037 |
| HSB10kb_298 | 1     | 25175398 | 25235831 | SJC_S000137 | 42272  | 96178  | +  | Sjp_0023790.1 | cellular component organization or biogenesis | NA       |
| HSB10kb_298 | 1     | 25175398 | 25235831 | SJC_S000137 | 42272  | 96178  | +  | Sjp_0023800.1 | NA                                            | NA       |
| HSB10kb_298 | 1     | 25175398 | 25235831 | SJC_S000137 | 42272  | 96178  | +  | Sjp_0023810.1 | NA                                            | NA       |
| HSB10kb_298 | 1     | 25175398 | 25235831 | SJC_S000137 | 42272  | 96178  | +  | Sjp_0023820.1 | establishment of localization                 | NA       |
| EBR10kb_194 | "1,1" | NA       | NA       | SJC_S000137 | 96179  | 105917 | NA | Sjp_0023820.1 | establishment of localization                 | NA       |
| EBR10kb_194 | "1,1" | NA       | NA       | SJC_S000137 | 96179  | 105917 | NA | Sjp_0023830.1 | NA                                            | NA       |
| EBR10kb_194 | "1,1" | NA       | NA       | SJC_S000137 | 96179  | 105917 | NA | Sjp_0023840.1 | NA                                            | NA       |
| HSB10kb_299 | 1     | 40440790 | 40483370 | SJC_S000137 | 105918 | 121617 |    | Sjp_0023840.1 | NA                                            | NA       |
| EBR10kb_195 | "1,1" | NA       | NA       | SJC_S000137 | 121618 | 140551 | NA | Sjp_0023840.1 | NA                                            | NA       |
| EBR10kb_195 | "1,1" | NA       | NA       | SJC_S000137 | 121618 | 140551 | NA | Sjp_0023850.1 | binding                                       | 0.052762 |
| HSB10kb_300 | 1     | 25238885 | 25264128 | SJC_S000137 | 140552 | 160065 | +  | Sjp_0023850.1 | binding                                       | 0.052762 |
| EBR10kb_196 | "1,1" | NA       | NA       | SJC_S000137 | 160066 | 187672 | NA | Sjp_0023860.1 | binding                                       | 0.052762 |
| HSB10kb_301 | 1     | 24985250 | 25148525 | SJC_S000137 | 187673 | 338424 | -  | Sjp_0023860.1 | binding                                       | 0.052762 |
| HSB10kb_301 | 1     | 24985250 | 25148525 | SJC_S000137 | 187673 | 338424 | -  | Sjp_0023870.1 | NA                                            | NA       |
| HSB10kb_301 | 1     | 24985250 | 25148525 | SJC_S000137 | 187673 | 338424 | -  | Sjp_0023880.1 | NA                                            | NA       |
| HSB10kb_301 | 1     | 24985250 | 25148525 | SJC_S000137 | 187673 | 338424 | -  | Sjp_0023890.1 | response to stimulus                          | NA       |
| HSB10kb_302 | 2     | 12096337 | 12641038 | SJC_S000138 | 15454  | 520425 | +  | Sjp_0023900.1 | cellular process                              | 0.63852  |
| HSB10kb_302 | 2     | 12096337 | 12641038 | SJC_S000138 | 15454  | 520425 | +  | Sjp_0023910.1 | NA                                            | NA       |
| HSB10kb_302 | 2     | 12096337 | 12641038 | SJC_S000138 | 15454  | 520425 | +  | Sjp_0023920.1 | cellular process                              | 0.63852  |



|             |       |          |          |             |        |        |    |               |                           |          |
|-------------|-------|----------|----------|-------------|--------|--------|----|---------------|---------------------------|----------|
| HSB10kb_302 | 2     | 12096337 | 12641038 | SJC_S000138 | 15454  | 520425 | +  | Sjp_0023930.1 | binding                   | 0.052762 |
| HSB10kb_302 | 2     | 12096337 | 12641038 | SJC_S000138 | 15454  | 520425 | +  | Sjp_0023940.1 | NA                        | NA       |
| HSB10kb_302 | 2     | 12096337 | 12641038 | SJC_S000138 | 15454  | 520425 | +  | Sjp_0023950.1 | NA                        | NA       |
| HSB10kb_302 | 2     | 12096337 | 12641038 | SJC_S000138 | 15454  | 520425 | +  | Sjp_0023960.1 | NA                        | NA       |
| HSB10kb_302 | 2     | 12096337 | 12641038 | SJC_S000138 | 15454  | 520425 | +  | Sjp_0023970.1 | NA                        | NA       |
| HSB10kb_302 | 2     | 12096337 | 12641038 | SJC_S000138 | 15454  | 520425 | +  | Sjp_0023980.1 | NA                        | NA       |
| HSB10kb_302 | 2     | 12096337 | 12641038 | SJC_S000138 | 15454  | 520425 | +  | Sjp_0023990.1 | catalytic activity        | 0.035844 |
| HSB10kb_302 | 2     | 12096337 | 12641038 | SJC_S000138 | 15454  | 520425 | +  | Sjp_0024000.1 | NA                        | NA       |
| HSB10kb_302 | 2     | 12096337 | 12641038 | SJC_S000138 | 15454  | 520425 | +  | Sjp_0024010.1 | NA                        | NA       |
| HSB10kb_302 | 2     | 12096337 | 12641038 | SJC_S000138 | 15454  | 520425 | +  | Sjp_0024020.1 | cell part                 | 0.009037 |
| HSB10kb_302 | 2     | 12096337 | 12641038 | SJC_S000138 | 15454  | 520425 | +  | Sjp_0024030.1 | NA                        | NA       |
| HSB10kb_302 | 2     | 12096337 | 12641038 | SJC_S000138 | 15454  | 520425 | +  | Sjp_0024040.1 | NA                        | NA       |
| HSB10kb_302 | 2     | 12096337 | 12641038 | SJC_S000138 | 15454  | 520425 | +  | Sjp_0024050.1 | biological regulation     | 0.76396  |
| HSB10kb_302 | 2     | 12096337 | 12641038 | SJC_S000138 | 15454  | 520425 | +  | Sjp_0024060.1 | NA                        | NA       |
| HSB10kb_302 | 2     | 12096337 | 12641038 | SJC_S000138 | 15454  | 520425 | +  | Sjp_0024070.1 | NA                        | NA       |
| HSB10kb_302 | 2     | 12096337 | 12641038 | SJC_S000138 | 15454  | 520425 | +  | Sjp_0024080.1 | NA                        | NA       |
| HSB10kb_302 | 2     | 12096337 | 12641038 | SJC_S000138 | 15454  | 520425 | +  | Sjp_0024090.1 | extracellular region part | NA       |
| HSB10kb_302 | 2     | 12096337 | 12641038 | SJC_S000138 | 15454  | 520425 | +  | Sjp_0024100.1 | NA                        | NA       |
| EBR10kb_197 | "2,2" | NA       | NA       | SJC_S000138 | 520426 | 545262 | NA | Sjp_0024110.1 | NA                        | NA       |
| HSB10kb_303 | 2     | 13930586 | 14080244 | SJC_S000138 | 545263 | 693566 | -  | Sjp_0024110.1 | NA                        | NA       |
| HSB10kb_303 | 2     | 13930586 | 14080244 | SJC_S000138 | 545263 | 693566 | -  | Sjp_0024120.1 | cell part                 | 0.009037 |
| HSB10kb_303 | 2     | 13930586 | 14080244 | SJC_S000138 | 545263 | 693566 | -  | Sjp_0024130.1 | NA                        | NA       |
| HSB10kb_303 | 2     | 13930586 | 14080244 | SJC_S000138 | 545263 | 693566 | -  | Sjp_0024140.1 | NA                        | NA       |
| EBR10kb_198 | "2,1" | NA       | NA       | SJC_S000138 | 693567 | 710673 | NA | Sjp_0024150.1 | NA                        | NA       |
| HSB10kb_304 | 1     | 53910460 | 53943707 | SJC_S000138 | 710674 | 761233 | +  | Sjp_0024150.1 | NA                        | NA       |
| HSB10kb_304 | 1     | 53910460 | 53943707 | SJC_S000138 | 710674 | 761233 | +  | Sjp_0024160.1 | binding                   | 0.052762 |
| HSB10kb_304 | 1     | 53910460 | 53943707 | SJC_S000138 | 710674 | 761233 | +  | Sjp_0024170.1 | NA                        | NA       |
| HSB10kb_304 | 1     | 53910460 | 53943707 | SJC_S000138 | 710674 | 761233 | +  | Sjp_0024180.1 | NA                        | NA       |
| HSB10kb_304 | 1     | 53910460 | 53943707 | SJC_S000138 | 710674 | 761233 | +  | Sjp_0024190.1 | NA                        | NA       |
| unknown     | NA    | NA       | NA       | SJC_S000139 | NA     | NA     | NA | Sjp_0024200.1 | NA                        | NA       |
| unknown     | NA    | NA       | NA       | SJC_S000139 | NA     | NA     | NA | Sjp_0024210.1 | NA                        | NA       |
| unknown     | NA    | NA       | NA       | SJC_S000139 | NA     | NA     | NA | Sjp_0024220.1 | NA                        | NA       |

|             |       |         |         |             |        |        |    |               |                                  |          |
|-------------|-------|---------|---------|-------------|--------|--------|----|---------------|----------------------------------|----------|
| unknown     | NA    | NA      | NA      | SJC_S000139 | NA     | NA     | NA | Sjp_0024230.1 | NA                               | NA       |
| HSB10kb_305 | 4     | 1559686 | 1932594 | SJC_S000139 | 124239 | 427330 | -  | Sjp_0024240.1 | transcription regulator activity | NA       |
| HSB10kb_305 | 4     | 1559686 | 1932594 | SJC_S000139 | 124239 | 427330 | -  | Sjp_0024260.1 | NA                               | NA       |
| HSB10kb_305 | 4     | 1559686 | 1932594 | SJC_S000139 | 124239 | 427330 | -  | Sjp_0024270.1 | catalytic activity               | 0.035844 |
| HSB10kb_305 | 4     | 1559686 | 1932594 | SJC_S000139 | 124239 | 427330 | -  | Sjp_0024280.1 | NA                               | NA       |
| HSB10kb_305 | 4     | 1559686 | 1932594 | SJC_S000139 | 124239 | 427330 | -  | Sjp_0024290.1 | NA                               | NA       |
| HSB10kb_305 | 4     | 1559686 | 1932594 | SJC_S000139 | 124239 | 427330 | -  | Sjp_0024300.1 | NA                               | NA       |
| HSB10kb_305 | 4     | 1559686 | 1932594 | SJC_S000139 | 124239 | 427330 | -  | Sjp_0024310.1 | cell part                        | 0.009037 |
| HSB10kb_305 | 4     | 1559686 | 1932594 | SJC_S000139 | 124239 | 427330 | -  | Sjp_0024320.1 | NA                               | NA       |
| HSB10kb_305 | 4     | 1559686 | 1932594 | SJC_S000139 | 124239 | 427330 | -  | Sjp_0024330.1 | NA                               | NA       |
| HSB10kb_305 | 4     | 1559686 | 1932594 | SJC_S000139 | 124239 | 427330 | -  | Sjp_0024340.1 | catalytic activity               | 0.035844 |
| unknown     | NA    | NA      | NA      | SJC_S000140 | NA     | NA     | NA | Sjp_0024350.1 | cell part                        | 0.009037 |
| unknown     | NA    | NA      | NA      | SJC_S000140 | NA     | NA     | NA | Sjp_0024360.1 | NA                               | NA       |
| unknown     | NA    | NA      | NA      | SJC_S000140 | NA     | NA     | NA | Sjp_0024370.1 | NA                               | NA       |
| unknown     | NA    | NA      | NA      | SJC_S000140 | NA     | NA     | NA | Sjp_0024380.1 | binding                          | 0.052762 |
| HSB10kb_306 | 2     | 9000251 | 9072420 | SJC_S000141 | 120    | 88270  | +  | Sjp_0024390.1 | biological regulation            | 0.76396  |
| HSB10kb_306 | 2     | 9000251 | 9072420 | SJC_S000141 | 120    | 88270  | +  | Sjp_0024400.1 | catalytic activity               | 0.035844 |
| HSB10kb_306 | 2     | 9000251 | 9072420 | SJC_S000141 | 120    | 88270  | +  | Sjp_0024410.1 | NA                               | NA       |
| EBR10kb_199 | "2,2" | NA      | NA      | SJC_S000141 | 88271  | 158217 | NA | Sjp_0024410.1 | NA                               | NA       |
| EBR10kb_199 | "2,2" | NA      | NA      | SJC_S000141 | 88271  | 158217 | NA | Sjp_0024420.1 | NA                               | NA       |
| EBR10kb_199 | "2,2" | NA      | NA      | SJC_S000141 | 88271  | 158217 | NA | Sjp_0024430.1 | NA                               | NA       |
| HSB10kb_307 | 2     | 8905206 | 8947363 | SJC_S000141 | 158218 | 218110 | -  | Sjp_0024430.1 | NA                               | NA       |
| HSB10kb_307 | 2     | 8905206 | 8947363 | SJC_S000141 | 158218 | 218110 | -  | Sjp_0024440.1 | molecular transducer activity    | 0.50162  |
| HSB10kb_307 | 2     | 8905206 | 8947363 | SJC_S000141 | 158218 | 218110 | -  | Sjp_0024450.1 | NA                               | NA       |
| EBR10kb_200 | "2,2" | NA      | NA      | SJC_S000141 | 218111 | 303705 | NA | Sjp_0024450.1 | NA                               | NA       |
| EBR10kb_200 | "2,2" | NA      | NA      | SJC_S000141 | 218111 | 303705 | NA | Sjp_0024460.1 | NA                               | NA       |
| EBR10kb_200 | "2,2" | NA      | NA      | SJC_S000141 | 218111 | 303705 | NA | Sjp_0024470.1 | NA                               | NA       |
| EBR10kb_200 | "2,2" | NA      | NA      | SJC_S000141 | 218111 | 303705 | NA | Sjp_0024480.1 | molecular transducer             | 0.50162  |

|             |       |         |         |             |        |        |    |               |                               |          |
|-------------|-------|---------|---------|-------------|--------|--------|----|---------------|-------------------------------|----------|
|             |       |         |         |             |        |        |    |               | activity                      |          |
| EBR10kb_200 | "2,2" | NA      | NA      | SJC_S000141 | 218111 | 303705 | NA | Sjp_0024490.1 | binding                       | 0.052762 |
| EBR10kb_200 | "2,2" | NA      | NA      | SJC_S000141 | 218111 | 303705 | NA | Sjp_0024500.1 | NA                            | NA       |
| HSB10kb_308 | 2     | 8317837 | 8419133 | SJC_S000141 | 303706 | 402377 | -  | Sjp_0024510.1 | NA                            | NA       |
| HSB10kb_308 | 2     | 8317837 | 8419133 | SJC_S000141 | 303706 | 402377 | -  | Sjp_0024520.1 | catalytic activity            | 0.035844 |
| HSB10kb_308 | 2     | 8317837 | 8419133 | SJC_S000141 | 303706 | 402377 | -  | Sjp_0024530.1 | NA                            | NA       |
| EBR10kb_201 | "2,2" | NA      | NA      | SJC_S000141 | 402378 | 405247 | NA | NA            | NA                            | NA       |
| HSB10kb_309 | 2     | 8210111 | 8293024 | SJC_S000141 | 405248 | 459104 | +  | Sjp_0024540.1 | NA                            | NA       |
| HSB10kb_309 | 2     | 8210111 | 8293024 | SJC_S000141 | 405248 | 459104 | +  | Sjp_0024550.1 | molecular transducer activity | 0.50162  |
| HSB10kb_309 | 2     | 8210111 | 8293024 | SJC_S000141 | 405248 | 459104 | +  | Sjp_0024560.1 | NA                            | NA       |
| EBR10kb_202 | "2,2" | NA      | NA      | SJC_S000141 | 459105 | 571194 | NA | Sjp_0024570.1 | NA                            | NA       |
| EBR10kb_202 | "2,2" | NA      | NA      | SJC_S000141 | 459105 | 571194 | NA | Sjp_0024580.1 | NA                            | NA       |
| EBR10kb_202 | "2,2" | NA      | NA      | SJC_S000141 | 459105 | 571194 | NA | Sjp_0024590.1 | NA                            | NA       |
| EBR10kb_202 | "2,2" | NA      | NA      | SJC_S000141 | 459105 | 571194 | NA | Sjp_0024600.1 | cell part                     | 0.009037 |
| EBR10kb_202 | "2,2" | NA      | NA      | SJC_S000141 | 459105 | 571194 | NA | Sjp_0024610.1 | catalytic activity            | 0.035844 |
| HSB10kb_310 | 2     | 6156288 | 6224361 | SJC_S000141 | 571195 | 611775 | -  | Sjp_0024610.1 | catalytic activity            | 0.035844 |
| HSB10kb_310 | 2     | 6156288 | 6224361 | SJC_S000141 | 571195 | 611775 | -  | Sjp_0024620.1 | NA                            | NA       |
| unknown     | NA    | NA      | NA      | SJC_S000141 | NA     | NA     | NA | Sjp_0024630.1 | enzyme regulator activity     | 0.1755   |
| unknown     | NA    | NA      | NA      | SJC_S000142 | NA     | NA     | NA | Sjp_0024640.1 | biological regulation         | 0.76396  |
| unknown     | NA    | NA      | NA      | SJC_S000142 | NA     | NA     | NA | Sjp_0024650.1 | NA                            | NA       |
| unknown     | NA    | NA      | NA      | SJC_S000142 | NA     | NA     | NA | Sjp_0024660.1 | NA                            | NA       |
| unknown     | NA    | NA      | NA      | SJC_S000142 | NA     | NA     | NA | Sjp_0024670.1 | NA                            | NA       |
| unknown     | NA    | NA      | NA      | SJC_S000142 | NA     | NA     | NA | Sjp_0024680.1 | NA                            | NA       |
| unknown     | NA    | NA      | NA      | SJC_S000142 | NA     | NA     | NA | Sjp_0024690.1 | NA                            | NA       |
| unknown     | NA    | NA      | NA      | SJC_S000142 | NA     | NA     | NA | Sjp_0024700.1 | NA                            | NA       |
| unknown     | NA    | NA      | NA      | SJC_S000142 | NA     | NA     | NA | Sjp_0024710.1 | biological regulation         | 0.76396  |
| unknown     | NA    | NA      | NA      | SJC_S000143 | NA     | NA     | NA | Sjp_0024720.1 | binding                       | 0.052762 |
| unknown     | NA    | NA      | NA      | SJC_S000143 | NA     | NA     | NA | Sjp_0024730.1 | cell part                     | 0.009037 |

|             |       |          |          |             |        |        |    |               |                               |          |
|-------------|-------|----------|----------|-------------|--------|--------|----|---------------|-------------------------------|----------|
| HSB10kb_311 | 1     | 10669936 | 10691509 | SJC_S000143 | 41689  | 72194  | +  | Sjp_0024740.1 | NA                            | NA       |
| HSB10kb_311 | 1     | 10669936 | 10691509 | SJC_S000143 | 41689  | 72194  | +  | Sjp_0024750.1 | molecular transducer activity | 0.50162  |
| EBR10kb_203 | "1,2" | NA       | NA       | SJC_S000143 | 72195  | 103451 | NA | Sjp_0024750.1 | molecular transducer activity | 0.50162  |
| EBR10kb_203 | "1,2" | NA       | NA       | SJC_S000143 | 72195  | 103451 | NA | Sjp_0024760.1 | NA                            | NA       |
| HSB10kb_312 | 2     | 30583693 | 30611578 | SJC_S000143 | 103452 | 127277 | +  | Sjp_0024760.1 | NA                            | NA       |
| HSB10kb_312 | 2     | 30583693 | 30611578 | SJC_S000143 | 103452 | 127277 | +  | Sjp_0024770.1 | NA                            | NA       |
| unknown     | NA    | NA       | NA       | SJC_S000144 | NA     | NA     | NA | Sjp_0024780.1 | NA                            | NA       |
| unknown     | NA    | NA       | NA       | SJC_S000144 | NA     | NA     | NA | Sjp_0024790.1 | binding                       | 0.052762 |
| unknown     | NA    | NA       | NA       | SJC_S000144 | NA     | NA     | NA | Sjp_0024800.1 | metabolic process             | 0.41934  |
| unknown     | NA    | NA       | NA       | SJC_S000144 | NA     | NA     | NA | Sjp_0024810.1 | catalytic activity            | 0.035844 |
| unknown     | NA    | NA       | NA       | SJC_S000145 | NA     | NA     | NA | Sjp_0024820.1 | biological regulation         | 0.76396  |
| unknown     | NA    | NA       | NA       | SJC_S000145 | NA     | NA     | NA | Sjp_0024830.1 | NA                            | NA       |
| unknown     | NA    | NA       | NA       | SJC_S000145 | NA     | NA     | NA | Sjp_0024840.1 | cellular process              | 0.63852  |
| unknown     | NA    | NA       | NA       | SJC_S000145 | NA     | NA     | NA | Sjp_0024850.1 | NA                            | NA       |
| unknown     | NA    | NA       | NA       | SJC_S000145 | NA     | NA     | NA | Sjp_0024860.1 | NA                            | NA       |
| unknown     | NA    | NA       | NA       | SJC_S000145 | NA     | NA     | NA | Sjp_0024870.1 | NA                            | NA       |
| unknown     | NA    | NA       | NA       | SJC_S000145 | NA     | NA     | NA | Sjp_0024880.1 | NA                            | NA       |
| unknown     | NA    | NA       | NA       | SJC_S000146 | NA     | NA     | NA | Sjp_0024890.1 | NA                            | NA       |
| unknown     | NA    | NA       | NA       | SJC_S000146 | NA     | NA     | NA | Sjp_0024900.1 | NA                            | NA       |
| unknown     | NA    | NA       | NA       | SJC_S000146 | NA     | NA     | NA | Sjp_0024910.1 | NA                            | NA       |
| unknown     | NA    | NA       | NA       | SJC_S000146 | NA     | NA     | NA | Sjp_0024920.1 | NA                            | NA       |
| unknown     | NA    | NA       | NA       | SJC_S000146 | NA     | NA     | NA | Sjp_0024930.1 | NA                            | NA       |
| unknown     | NA    | NA       | NA       | SJC_S000146 | NA     | NA     | NA | Sjp_0024940.1 | NA                            | NA       |
| unknown     | NA    | NA       | NA       | SJC_S000146 | NA     | NA     | NA | Sjp_0024960.1 | NA                            | NA       |
| unknown     | NA    | NA       | NA       | SJC_S000146 | NA     | NA     | NA | Sjp_0024970.1 | binding                       | 0.052762 |
| unknown     | NA    | NA       | NA       | SJC_S000146 | NA     | NA     | NA | Sjp_0024980.1 | NA                            | NA       |
| unknown     | NA    | NA       | NA       | SJC_S000146 | NA     | NA     | NA | Sjp_0024990.1 | NA                            | NA       |
| unknown     | NA    | NA       | NA       | SJC_S000146 | NA     | NA     | NA | Sjp_0025000.1 | NA                            | NA       |

|             |       |          |          |             |        |        |    |               |                           |          |
|-------------|-------|----------|----------|-------------|--------|--------|----|---------------|---------------------------|----------|
| unknown     | NA    | NA       | NA       | SJC_S000146 | NA     | NA     | NA | Sjp_0025010.1 | NA                        | NA       |
| unknown     | NA    | NA       | NA       | SJC_S000146 | NA     | NA     | NA | Sjp_0025020.1 | NA                        | NA       |
| unknown     | NA    | NA       | NA       | SJC_S000146 | NA     | NA     | NA | Sjp_0025030.1 | NA                        | NA       |
| unknown     | NA    | NA       | NA       | SJC_S000146 | NA     | NA     | NA | Sjp_0025040.1 | NA                        | NA       |
| unknown     | NA    | NA       | NA       | SJC_S000146 | NA     | NA     | NA | Sjp_0025050.1 | NA                        | NA       |
| HSB10kb_313 | 2     | 9799785  | 9810843  | SJC_S000146 | 612266 | 634558 | +  | Sjp_0025060.1 | binding                   | 0.052762 |
| unknown     | NA    | NA       | NA       | SJC_S000146 | NA     | NA     | NA | Sjp_0025070.1 | biological regulation     | 0.76396  |
| unknown     | NA    | NA       | NA       | SJC_S000147 | NA     | NA     | NA | Sjp_0025080.1 | enzyme regulator activity | 0.1755   |
| unknown     | NA    | NA       | NA       | SJC_S000147 | NA     | NA     | NA | Sjp_0025090.1 | NA                        | NA       |
| unknown     | NA    | NA       | NA       | SJC_S000147 | NA     | NA     | NA | Sjp_0025100.1 | biological regulation     | 0.76396  |
| HSB10kb_314 | 1     | 25544352 | 25559518 | SJC_S000147 | 66553  | 77940  |    | Sjp_0025110.1 | NA                        | NA       |
| HSB10kb_314 | 1     | 25544352 | 25559518 | SJC_S000147 | 66553  | 77940  |    | Sjp_0025120.1 | NA                        | NA       |
| EBR10kb_204 | "1,1" | NA       | NA       | SJC_S000147 | 77941  | 125878 | NA | Sjp_0025120.1 | NA                        | NA       |
| EBR10kb_204 | "1,1" | NA       | NA       | SJC_S000147 | 77941  | 125878 | NA | Sjp_0025130.1 | multi-organism process    | NA       |
| EBR10kb_204 | "1,1" | NA       | NA       | SJC_S000147 | 77941  | 125878 | NA | Sjp_0025140.1 | NA                        | NA       |
| EBR10kb_204 | "1,1" | NA       | NA       | SJC_S000147 | 77941  | 125878 | NA | Sjp_0025150.1 | cellular process          | 0.63852  |
| HSB10kb_315 | 1     | 10771082 | 10823870 | SJC_S000147 | 125879 | 166562 | -  | Sjp_0025150.1 | cellular process          | 0.63852  |
| HSB10kb_316 | 1     | 32490274 | 33091973 | SJC_S000148 | 12196  | 402384 | -  | Sjp_0025170.1 | NA                        | NA       |
| HSB10kb_316 | 1     | 32490274 | 33091973 | SJC_S000148 | 12196  | 402384 | -  | Sjp_0025180.1 | NA                        | NA       |
| HSB10kb_316 | 1     | 32490274 | 33091973 | SJC_S000148 | 12196  | 402384 | -  | Sjp_0025190.1 | NA                        | NA       |
| HSB10kb_316 | 1     | 32490274 | 33091973 | SJC_S000148 | 12196  | 402384 | -  | Sjp_0025200.1 | cell part                 | 0.009037 |
| HSB10kb_316 | 1     | 32490274 | 33091973 | SJC_S000148 | 12196  | 402384 | -  | Sjp_0025210.1 | NA                        | NA       |
| HSB10kb_316 | 1     | 32490274 | 33091973 | SJC_S000148 | 12196  | 402384 | -  | Sjp_0025220.1 | binding                   | 0.052762 |
| HSB10kb_316 | 1     | 32490274 | 33091973 | SJC_S000148 | 12196  | 402384 | -  | Sjp_0025230.1 | cell part                 | 0.009037 |
| HSB10kb_316 | 1     | 32490274 | 33091973 | SJC_S000148 | 12196  | 402384 | -  | Sjp_0025240.1 | biological regulation     | 0.76396  |
| HSB10kb_316 | 1     | 32490274 | 33091973 | SJC_S000148 | 12196  | 402384 | -  | Sjp_0025250.1 | NA                        | NA       |
| HSB10kb_316 | 1     | 32490274 | 33091973 | SJC_S000148 | 12196  | 402384 | -  | Sjp_0025260.1 | NA                        | NA       |
| HSB10kb_316 | 1     | 32490274 | 33091973 | SJC_S000148 | 12196  | 402384 | -  | Sjp_0025280.1 | NA                        | NA       |

|             |        |          |          |             |       |        |    |               |                           |          |
|-------------|--------|----------|----------|-------------|-------|--------|----|---------------|---------------------------|----------|
| HSB10kb_316 | 1      | 32490274 | 33091973 | SJC_S000148 | 12196 | 402384 | -  | Sjp_0025290.1 | biological regulation     | 0.76396  |
| HSB10kb_316 | 1      | 32490274 | 33091973 | SJC_S000148 | 12196 | 402384 | -  | Sjp_0025300.1 | cell part                 | 0.009037 |
| HSB10kb_316 | 1      | 32490274 | 33091973 | SJC_S000148 | 12196 | 402384 | -  | Sjp_0025310.1 | NA                        | NA       |
| HSB10kb_316 | 1      | 32490274 | 33091973 | SJC_S000148 | 12196 | 402384 | -  | Sjp_0025320.1 | cell part                 | 0.009037 |
| unknown     | NA     | NA       | NA       | SJC_S000149 | NA    | NA     | NA | Sjp_0025330.1 | NA                        | NA       |
| HSB10kb_317 | 3      | 12370193 | 12398526 | SJC_S000149 | 13996 | 35989  | +  | Sjp_0025340.1 | cell part                 | 0.009037 |
| EBR10kb_205 | "3,3"  | NA       | NA       | SJC_S000149 | 35990 | 52192  | NA | Sjp_0025340.1 | cell part                 | 0.009037 |
| HSB10kb_318 | 3      | 19278398 | 19793808 | SJC_S000149 | 52193 | 495055 | -  | Sjp_0025340.1 | cell part                 | 0.009037 |
| HSB10kb_318 | 3      | 19278398 | 19793808 | SJC_S000149 | 52193 | 495055 | -  | Sjp_0025350.1 | catalytic activity        | 0.035844 |
| HSB10kb_318 | 3      | 19278398 | 19793808 | SJC_S000149 | 52193 | 495055 | -  | Sjp_0025360.1 | enzyme regulator activity | 0.1755   |
| HSB10kb_318 | 3      | 19278398 | 19793808 | SJC_S000149 | 52193 | 495055 | -  | Sjp_0025370.1 | NA                        | NA       |
| HSB10kb_318 | 3      | 19278398 | 19793808 | SJC_S000149 | 52193 | 495055 | -  | Sjp_0025380.1 | NA                        | NA       |
| HSB10kb_318 | 3      | 19278398 | 19793808 | SJC_S000149 | 52193 | 495055 | -  | Sjp_0025390.1 | NA                        | NA       |
| HSB10kb_318 | 3      | 19278398 | 19793808 | SJC_S000149 | 52193 | 495055 | -  | Sjp_0025400.1 | NA                        | NA       |
| HSB10kb_318 | 3      | 19278398 | 19793808 | SJC_S000149 | 52193 | 495055 | -  | Sjp_0025410.1 | NA                        | NA       |
| HSB10kb_318 | 3      | 19278398 | 19793808 | SJC_S000149 | 52193 | 495055 | -  | Sjp_0025420.1 | binding                   | 0.052762 |
| HSB10kb_318 | 3      | 19278398 | 19793808 | SJC_S000149 | 52193 | 495055 | -  | Sjp_0025430.1 | NA                        | NA       |
| HSB10kb_318 | 3      | 19278398 | 19793808 | SJC_S000149 | 52193 | 495055 | -  | Sjp_0025440.1 | NA                        | NA       |
| HSB10kb_318 | 3      | 19278398 | 19793808 | SJC_S000149 | 52193 | 495055 | -  | Sjp_0025450.1 | NA                        | NA       |
| HSB10kb_318 | 3      | 19278398 | 19793808 | SJC_S000149 | 52193 | 495055 | -  | Sjp_0025460.1 | NA                        | NA       |
| HSB10kb_318 | 3      | 19278398 | 19793808 | SJC_S000149 | 52193 | 495055 | -  | Sjp_0025470.1 | NA                        | NA       |
| HSB10kb_318 | 3      | 19278398 | 19793808 | SJC_S000149 | 52193 | 495055 | -  | Sjp_0025480.1 | NA                        | NA       |
| HSB10kb_318 | 3      | 19278398 | 19793808 | SJC_S000149 | 52193 | 495055 | -  | Sjp_0025490.1 | catalytic activity        | 0.035844 |
| HSB10kb_318 | 3      | 19278398 | 19793808 | SJC_S000149 | 52193 | 495055 | -  | Sjp_0025500.1 | reproductive process      | NA       |
| unknown     | NA     | NA       | NA       | SJC_S000149 | NA    | NA     | NA | Sjp_0025510.1 | NA                        | NA       |
| unknown     | NA     | NA       | NA       | SJC_S000150 | NA    | NA     | NA | Sjp_0025520.1 | biological regulation     | 0.76396  |
| HSB10kb_319 | WZ     | 21359790 | 21382062 | SJC_S000150 | 29729 | 57798  | +  | Sjp_0025530.1 | NA                        | NA       |
| EBR10kb_206 | "WZ,1" | NA       | NA       | SJC_S000150 | 57799 | 74384  | NA | Sjp_0025530.1 | NA                        | NA       |
| HSB10kb_320 | 1      | 43112900 | 43321296 | SJC_S000150 | 74385 | 114949 | +  | Sjp_0025540.1 | NA                        | NA       |

|             |       |          |          |             |        |        |    |               |                                  |          |
|-------------|-------|----------|----------|-------------|--------|--------|----|---------------|----------------------------------|----------|
| HSB10kb_320 | 1     | 43112900 | 43321296 | SJC_S000150 | 74385  | 114949 | +  | Sjp_0025550.1 | NA                               | NA       |
| HSB10kb_320 | 1     | 43112900 | 43321296 | SJC_S000150 | 74385  | 114949 | +  | Sjp_0025560.1 | NA                               | NA       |
| unknown     | NA    | NA       | NA       | SJC_S000150 | NA     | NA     | NA | Sjp_0025570.1 | enzyme regulator activity        | 0.1755   |
| unknown     | NA    | NA       | NA       | SJC_S000150 | NA     | NA     | NA | Sjp_0025580.1 | NA                               | NA       |
| unknown     | NA    | NA       | NA       | SJC_S000151 | NA     | NA     | NA | Sjp_0025590.1 | NA                               | NA       |
| HSB10kb_321 | 5     | 5984922  | 6302917  | SJC_S000151 | 28589  | 307780 | +  | Sjp_0025600.1 | biological regulation            | 0.76396  |
| HSB10kb_321 | 5     | 5984922  | 6302917  | SJC_S000151 | 28589  | 307780 | +  | Sjp_0025610.1 | NA                               | NA       |
| HSB10kb_321 | 5     | 5984922  | 6302917  | SJC_S000151 | 28589  | 307780 | +  | Sjp_0025620.1 | NA                               | NA       |
| HSB10kb_321 | 5     | 5984922  | 6302917  | SJC_S000151 | 28589  | 307780 | +  | Sjp_0025630.1 | cellular process                 | 0.63852  |
| HSB10kb_321 | 5     | 5984922  | 6302917  | SJC_S000151 | 28589  | 307780 | +  | Sjp_0025640.1 | NA                               | NA       |
| HSB10kb_321 | 5     | 5984922  | 6302917  | SJC_S000151 | 28589  | 307780 | +  | Sjp_0025650.1 | NA                               | NA       |
| HSB10kb_321 | 5     | 5984922  | 6302917  | SJC_S000151 | 28589  | 307780 | +  | Sjp_0025660.1 | NA                               | NA       |
| unknown     | NA    | NA       | NA       | SJC_S000151 | NA     | NA     | NA | Sjp_0025670.1 | NA                               | NA       |
| unknown     | NA    | NA       | NA       | SJC_S000152 | NA     | NA     | NA | Sjp_0025680.1 | NA                               | NA       |
| HSB10kb_322 | 6     | 8545424  | 8581631  | SJC_S000152 | 12827  | 37047  | -  | Sjp_0025690.1 | NA                               | NA       |
| EBR10kb_207 | "6,6" | NA       | NA       | SJC_S000152 | 37048  | 47080  | NA | NA            | NA                               | NA       |
| HSB10kb_323 | 6     | 8515311  | 8535812  | SJC_S000152 | 47081  | 66499  | +  | Sjp_0025700.1 | transcription regulator activity | NA       |
| HSB10kb_323 | 6     | 8515311  | 8535812  | SJC_S000152 | 47081  | 66499  | +  | Sjp_0025710.1 | NA                               | NA       |
| HSB10kb_323 | 6     | 8515311  | 8535812  | SJC_S000152 | 47081  | 66499  | +  | Sjp_0025720.1 | binding                          | 0.052762 |
| EBR10kb_208 | "6,6" | NA       | NA       | SJC_S000152 | 66500  | 86765  | NA | NA            | NA                               | NA       |
| HSB10kb_324 | 6     | 8417958  | 8500873  | SJC_S000152 | 86766  | 184840 | -  | Sjp_0025730.1 | NA                               | NA       |
| HSB10kb_324 | 6     | 8417958  | 8500873  | SJC_S000152 | 86766  | 184840 | -  | Sjp_0025740.1 | cellular process                 | 0.63852  |
| HSB10kb_324 | 6     | 8417958  | 8500873  | SJC_S000152 | 86766  | 184840 | -  | Sjp_0025750.1 | NA                               | NA       |
| HSB10kb_324 | 6     | 8417958  | 8500873  | SJC_S000152 | 86766  | 184840 | -  | Sjp_0025760.1 | NA                               | NA       |
| EBR10kb_209 | "6,1" | NA       | NA       | SJC_S000152 | 184841 | 215502 | NA | Sjp_0025760.1 | NA                               | NA       |
| EBR10kb_209 | "6,1" | NA       | NA       | SJC_S000152 | 184841 | 215502 | NA | Sjp_0025770.1 | catalytic activity               | 0.035844 |
| HSB10kb_325 | 1     | 31496201 | 31625560 | SJC_S000152 | 215503 | 321898 | -  | Sjp_0025780.1 | cell part                        | 0.009037 |
| HSB10kb_325 | 1     | 31496201 | 31625560 | SJC_S000152 | 215503 | 321898 | -  | Sjp_0025790.1 | catalytic activity               | 0.035844 |
| HSB10kb_325 | 1     | 31496201 | 31625560 | SJC_S000152 | 215503 | 321898 | -  | Sjp_0025800.1 | catalytic activity               | 0.035844 |

|             |       |          |          |             |        |        |    |               |                                               |          |
|-------------|-------|----------|----------|-------------|--------|--------|----|---------------|-----------------------------------------------|----------|
| unknown     | NA    | NA       | NA       | SJC_S000153 | NA     | NA     | NA | Sjp_0025810.1 | establishment of localization                 | NA       |
| HSB10kb_326 | 1     | 34990090 | 35075538 | SJC_S000154 | 2763   | 113838 | +  | Sjp_0025820.1 | NA                                            | NA       |
| HSB10kb_326 | 1     | 34990090 | 35075538 | SJC_S000154 | 2763   | 113838 | +  | Sjp_0025830.1 | NA                                            | NA       |
| EBR10kb_210 | "1,1" | NA       | NA       | SJC_S000154 | 113839 | 148287 | NA | Sjp_0025840.1 | NA                                            | NA       |
| EBR10kb_210 | "1,1" | NA       | NA       | SJC_S000154 | 113839 | 148287 | NA | Sjp_0025850.1 | catalytic activity                            | 0.035844 |
| HSB10kb_327 | 1     | 44030496 | 44371844 | SJC_S000154 | 148288 | 529077 | -  | Sjp_0025850.1 | catalytic activity                            | 0.035844 |
| HSB10kb_327 | 1     | 44030496 | 44371844 | SJC_S000154 | 148288 | 529077 | -  | Sjp_0025860.1 | catalytic activity                            | 0.035844 |
| HSB10kb_327 | 1     | 44030496 | 44371844 | SJC_S000154 | 148288 | 529077 | -  | Sjp_0025870.1 | catalytic activity                            | 0.035844 |
| HSB10kb_327 | 1     | 44030496 | 44371844 | SJC_S000154 | 148288 | 529077 | -  | Sjp_0025880.1 | catalytic activity                            | 0.035844 |
| HSB10kb_327 | 1     | 44030496 | 44371844 | SJC_S000154 | 148288 | 529077 | -  | Sjp_0025890.1 | NA                                            | NA       |
| HSB10kb_327 | 1     | 44030496 | 44371844 | SJC_S000154 | 148288 | 529077 | -  | Sjp_0025900.1 | NA                                            | NA       |
| HSB10kb_327 | 1     | 44030496 | 44371844 | SJC_S000154 | 148288 | 529077 | -  | Sjp_0025910.1 | transporter activity                          | 0.782    |
| HSB10kb_327 | 1     | 44030496 | 44371844 | SJC_S000154 | 148288 | 529077 | -  | Sjp_0025920.1 | binding                                       | 0.052762 |
| HSB10kb_327 | 1     | 44030496 | 44371844 | SJC_S000154 | 148288 | 529077 | -  | Sjp_0025930.1 | binding                                       | 0.052762 |
| HSB10kb_327 | 1     | 44030496 | 44371844 | SJC_S000154 | 148288 | 529077 | -  | Sjp_0025940.1 | binding                                       | 0.052762 |
| HSB10kb_327 | 1     | 44030496 | 44371844 | SJC_S000154 | 148288 | 529077 | -  | Sjp_0025950.1 | binding                                       | 0.052762 |
| HSB10kb_327 | 1     | 44030496 | 44371844 | SJC_S000154 | 148288 | 529077 | -  | Sjp_0025960.1 | binding                                       | 0.052762 |
| HSB10kb_327 | 1     | 44030496 | 44371844 | SJC_S000154 | 148288 | 529077 | -  | Sjp_0025970.1 | binding                                       | 0.052762 |
| HSB10kb_327 | 1     | 44030496 | 44371844 | SJC_S000154 | 148288 | 529077 | -  | Sjp_0025980.1 | binding                                       | 0.052762 |
| HSB10kb_327 | 1     | 44030496 | 44371844 | SJC_S000154 | 148288 | 529077 | -  | Sjp_0025990.1 | NA                                            | NA       |
| HSB10kb_327 | 1     | 44030496 | 44371844 | SJC_S000154 | 148288 | 529077 | -  | Sjp_0026000.1 | catalytic activity                            | 0.035844 |
| HSB10kb_327 | 1     | 44030496 | 44371844 | SJC_S000154 | 148288 | 529077 | -  | Sjp_0026010.1 | protein binding transcription factor activity | NA       |
| EBR10kb_211 | "1,1" | NA       | NA       | SJC_S000154 | 529078 | 546630 | NA | Sjp_0026020.1 | catalytic activity                            | 0.035844 |
| HSB10kb_328 | 1     | 40620064 | 40729373 | SJC_S000154 | 546631 | 649884 | -  | Sjp_0026020.1 | catalytic activity                            | 0.035844 |
| HSB10kb_328 | 1     | 40620064 | 40729373 | SJC_S000154 | 546631 | 649884 | -  | Sjp_0026030.1 | NA                                            | NA       |
| HSB10kb_328 | 1     | 40620064 | 40729373 | SJC_S000154 | 546631 | 649884 | -  | Sjp_0026040.1 | NA                                            | NA       |
| HSB10kb_328 | 1     | 40620064 | 40729373 | SJC_S000154 | 546631 | 649884 | -  | Sjp_0026050.1 | NA                                            | NA       |
| HSB10kb_328 | 1     | 40620064 | 40729373 | SJC_S000154 | 546631 | 649884 | -  | Sjp_0026060.1 | NA                                            | NA       |
| unknown     | NA    | NA       | NA       | SJC_S000154 | NA     | NA     | NA | Sjp_0026070.1 | binding                                       | 0.052762 |
| HSB10kb_329 | 1     | 27723728 | 27789227 | SJC_S000155 | 96     | 73371  | +  | Sjp_0026080.1 | NA                                            | NA       |



|             |         |          |          |             |        |        |    |               |                                                    |          |
|-------------|---------|----------|----------|-------------|--------|--------|----|---------------|----------------------------------------------------|----------|
| HSB10kb_329 | 1       | 27723728 | 27789227 | SJC_S000155 | 96     | 73371  | +  | Sjp_0026090.1 | NA                                                 | NA       |
| HSB10kb_329 | 1       | 27723728 | 27789227 | SJC_S000155 | 96     | 73371  | +  | Sjp_0026100.1 | NA                                                 | NA       |
| EBR10kb_212 | "1,1"   | NA       | NA       | SJC_S000155 | 73372  | 87437  | NA | Sjp_0026100.1 | NA                                                 | NA       |
| HSB10kb_330 | 1       | 27798901 | 27826625 | SJC_S000155 | 87438  | 122283 | -  | Sjp_0026100.1 | NA                                                 | NA       |
| EBR10kb_213 | "1,1"   | NA       | NA       | SJC_S000155 | 122284 | 125464 | NA | Sjp_0026110.1 | NA                                                 | NA       |
| HSB10kb_331 | 1       | 27856058 | 27978942 | SJC_S000155 | 125465 | 230953 | +  | Sjp_0026120.1 | NA                                                 | NA       |
| HSB10kb_331 | 1       | 27856058 | 27978942 | SJC_S000155 | 125465 | 230953 | +  | Sjp_0026130.1 | cell part                                          | 0.009037 |
| HSB10kb_331 | 1       | 27856058 | 27978942 | SJC_S000155 | 125465 | 230953 | +  | Sjp_0026140.1 | NA                                                 | NA       |
| HSB10kb_331 | 1       | 27856058 | 27978942 | SJC_S000155 | 125465 | 230953 | +  | Sjp_0026150.1 | NA                                                 | NA       |
| unknown     | NA      | NA       | NA       | SJC_S000155 | NA     | NA     | NA | Sjp_0026160.1 | catalytic activity                                 | 0.035844 |
| unknown     | NA      | NA       | NA       | SJC_S000155 | NA     | NA     | NA | Sjp_0026170.1 | transporter activity                               | 0.782    |
| unknown     | NA      | NA       | NA       | SJC_S000156 | NA     | NA     | NA | Sjp_0026180.1 | NA                                                 | NA       |
| HSB10kb_332 | 3       | 10732853 | 10888535 | SJC_S000157 | 13928  | 172397 | +  | Sjp_0026190.1 | biological regulation                              | 0.76396  |
| HSB10kb_332 | 3       | 10732853 | 10888535 | SJC_S000157 | 13928  | 172397 | +  | Sjp_0026200.1 | cell part                                          | 0.009037 |
| HSB10kb_332 | 3       | 10732853 | 10888535 | SJC_S000157 | 13928  | 172397 | +  | Sjp_0026210.1 | catalytic activity                                 | 0.035844 |
| HSB10kb_332 | 3       | 10732853 | 10888535 | SJC_S000157 | 13928  | 172397 | +  | Sjp_0026220.1 | catalytic activity                                 | 0.035844 |
| HSB10kb_332 | 3       | 10732853 | 10888535 | SJC_S000157 | 13928  | 172397 | +  | Sjp_0026230.1 | NA                                                 | NA       |
| HSB10kb_332 | 3       | 10732853 | 10888535 | SJC_S000157 | 13928  | 172397 | +  | Sjp_0026240.1 | molecular transducer activity                      | 0.50162  |
| HSB10kb_333 | WZ      | 34113170 | 34194308 | SJC_S000158 | 33409  | 102536 | +  | Sjp_0026250.1 | nucleic acid binding transcription factor activity | NA       |
| HSB10kb_333 | WZ      | 34113170 | 34194308 | SJC_S000158 | 33409  | 102536 | +  | Sjp_0026260.1 | NA                                                 | NA       |
| EBR10kb_214 | "WZ,WZ" | NA       | NA       | SJC_S000158 | 102537 | 106315 | NA | Sjp_0026270.1 | NA                                                 | NA       |
| HSB10kb_334 | WZ      | 34258233 | 34356413 | SJC_S000158 | 106316 | 169920 | +  | Sjp_0026270.1 | NA                                                 | NA       |
| HSB10kb_334 | WZ      | 34258233 | 34356413 | SJC_S000158 | 106316 | 169920 | +  | Sjp_0026280.1 | NA                                                 | NA       |
| HSB10kb_334 | WZ      | 34258233 | 34356413 | SJC_S000158 | 106316 | 169920 | +  | Sjp_0026290.1 | cell part                                          | 0.009037 |
| HSB10kb_334 | WZ      | 34258233 | 34356413 | SJC_S000158 | 106316 | 169920 | +  | Sjp_0026300.1 | molecular transducer activity                      | 0.50162  |

|             |    |          |          |             |       |        |    |               |                                  |          |
|-------------|----|----------|----------|-------------|-------|--------|----|---------------|----------------------------------|----------|
| HSB10kb_335 | 3  | 4006167  | 4576060  | SJC_S000159 | 391   | 547624 | +  | Sjp_0026310.1 | molecular transducer activity    | 0.50162  |
| HSB10kb_335 | 3  | 4006167  | 4576060  | SJC_S000159 | 391   | 547624 | +  | Sjp_0026320.1 | NA                               | NA       |
| HSB10kb_335 | 3  | 4006167  | 4576060  | SJC_S000159 | 391   | 547624 | +  | Sjp_0026330.1 | NA                               | NA       |
| HSB10kb_335 | 3  | 4006167  | 4576060  | SJC_S000159 | 391   | 547624 | +  | Sjp_0026340.1 | NA                               | NA       |
| HSB10kb_335 | 3  | 4006167  | 4576060  | SJC_S000159 | 391   | 547624 | +  | Sjp_0026350.1 | NA                               | NA       |
| HSB10kb_335 | 3  | 4006167  | 4576060  | SJC_S000159 | 391   | 547624 | +  | Sjp_0026360.1 | NA                               | NA       |
| HSB10kb_335 | 3  | 4006167  | 4576060  | SJC_S000159 | 391   | 547624 | +  | Sjp_0026370.1 | multicellular organismal process | NA       |
| HSB10kb_335 | 3  | 4006167  | 4576060  | SJC_S000159 | 391   | 547624 | +  | Sjp_0026380.1 | NA                               | NA       |
| HSB10kb_335 | 3  | 4006167  | 4576060  | SJC_S000159 | 391   | 547624 | +  | Sjp_0026390.1 | NA                               | NA       |
| HSB10kb_335 | 3  | 4006167  | 4576060  | SJC_S000159 | 391   | 547624 | +  | Sjp_0026400.1 | NA                               | NA       |
| HSB10kb_335 | 3  | 4006167  | 4576060  | SJC_S000159 | 391   | 547624 | +  | Sjp_0026410.1 | catalytic activity               | 0.035844 |
| HSB10kb_335 | 3  | 4006167  | 4576060  | SJC_S000159 | 391   | 547624 | +  | Sjp_0026420.1 | NA                               | NA       |
| HSB10kb_335 | 3  | 4006167  | 4576060  | SJC_S000159 | 391   | 547624 | +  | Sjp_0026430.1 | NA                               | NA       |
| HSB10kb_335 | 3  | 4006167  | 4576060  | SJC_S000159 | 391   | 547624 | +  | Sjp_0026440.1 | NA                               | NA       |
| HSB10kb_335 | 3  | 4006167  | 4576060  | SJC_S000159 | 391   | 547624 | +  | Sjp_0026450.1 | NA                               | NA       |
| HSB10kb_335 | 3  | 4006167  | 4576060  | SJC_S000159 | 391   | 547624 | +  | Sjp_0026460.1 | NA                               | NA       |
| HSB10kb_336 | 3  | 13988064 | 14163135 | SJC_S000160 | 13713 | 271304 | +  | Sjp_0026470.1 | cell part                        | 0.009037 |
| HSB10kb_336 | 3  | 13988064 | 14163135 | SJC_S000160 | 13713 | 271304 | +  | Sjp_0026480.1 | catalytic activity               | 0.035844 |
| HSB10kb_336 | 3  | 13988064 | 14163135 | SJC_S000160 | 13713 | 271304 | +  | Sjp_0026500.1 | NA                               | NA       |
| HSB10kb_336 | 3  | 13988064 | 14163135 | SJC_S000160 | 13713 | 271304 | +  | Sjp_0026510.1 | molecular transducer activity    | 0.50162  |
| HSB10kb_336 | 3  | 13988064 | 14163135 | SJC_S000160 | 13713 | 271304 | +  | Sjp_0026520.1 | binding                          | 0.052762 |
| HSB10kb_336 | 3  | 13988064 | 14163135 | SJC_S000160 | 13713 | 271304 | +  | Sjp_0026530.1 | NA                               | NA       |
| HSB10kb_336 | 3  | 13988064 | 14163135 | SJC_S000160 | 13713 | 271304 | +  | Sjp_0026540.1 | NA                               | NA       |
| HSB10kb_336 | 3  | 13988064 | 14163135 | SJC_S000160 | 13713 | 271304 | +  | Sjp_0026550.1 | NA                               | NA       |
| unknown     | NA | NA       | NA       | SJC_S000161 | NA    | NA     | NA | Sjp_0026560.1 | NA                               | NA       |
| HSB10kb_337 | 6  | 14584290 | 14878990 | SJC_S000161 | 40311 | 339757 | -  | Sjp_0026570.1 | NA                               | NA       |
| HSB10kb_337 | 6  | 14584290 | 14878990 | SJC_S000161 | 40311 | 339757 | -  | Sjp_0026580.1 | NA                               | NA       |
| HSB10kb_337 | 6  | 14584290 | 14878990 | SJC_S000161 | 40311 | 339757 | -  | Sjp_0026590.1 | biological                       | 0.76396  |

|             |       |          |          |             |        |        |    |               |                       |          |
|-------------|-------|----------|----------|-------------|--------|--------|----|---------------|-----------------------|----------|
|             |       |          |          |             |        |        |    |               | regulation            |          |
| HSB10kb_337 | 6     | 14584290 | 14878990 | SJC_S000161 | 40311  | 339757 | -  | Sjp_0026600.1 | biological regulation | 0.76396  |
| HSB10kb_337 | 6     | 14584290 | 14878990 | SJC_S000161 | 40311  | 339757 | -  | Sjp_0026610.1 | catalytic activity    | 0.035844 |
| HSB10kb_337 | 6     | 14584290 | 14878990 | SJC_S000161 | 40311  | 339757 | -  | Sjp_0026620.1 | NA                    | NA       |
| HSB10kb_337 | 6     | 14584290 | 14878990 | SJC_S000161 | 40311  | 339757 | -  | Sjp_0026630.1 | NA                    | NA       |
| EBR10kb_215 | "6,6" | NA       | NA       | SJC_S000161 | 339758 | 351649 | NA | Sjp_0026650.1 | cell part             | 0.009037 |
| HSB10kb_338 | 6     | 14536991 | 14556421 | SJC_S000161 | 351650 | 368215 | +  | Sjp_0026650.1 | cell part             | 0.009037 |
| EBR10kb_216 | "6,6" | NA       | NA       | SJC_S000161 | 368216 | 381954 | NA | NA            | NA                    | NA       |
| HSB10kb_339 | 6     | 14368239 | 14516611 | SJC_S000161 | 381955 | 531021 | -  | Sjp_0026660.1 | NA                    | NA       |
| HSB10kb_339 | 6     | 14368239 | 14516611 | SJC_S000161 | 381955 | 531021 | -  | Sjp_0026670.1 | NA                    | NA       |
| HSB10kb_339 | 6     | 14368239 | 14516611 | SJC_S000161 | 381955 | 531021 | -  | Sjp_0026680.1 | NA                    | NA       |
| HSB10kb_339 | 6     | 14368239 | 14516611 | SJC_S000161 | 381955 | 531021 | -  | Sjp_0026700.1 | NA                    | NA       |
| HSB10kb_339 | 6     | 14368239 | 14516611 | SJC_S000161 | 381955 | 531021 | -  | Sjp_0026710.1 | NA                    | NA       |
| HSB10kb_339 | 6     | 14368239 | 14516611 | SJC_S000161 | 381955 | 531021 | -  | Sjp_0026720.1 | NA                    | NA       |
| HSB10kb_339 | 6     | 14368239 | 14516611 | SJC_S000161 | 381955 | 531021 | -  | Sjp_0026730.1 | NA                    | NA       |
| unknown     | NA    | NA       | NA       | SJC_S000162 | NA     | NA     | NA | Sjp_0026740.1 | NA                    | NA       |
| unknown     | NA    | NA       | NA       | SJC_S000162 | NA     | NA     | NA | Sjp_0026750.1 | NA                    | NA       |
| unknown     | NA    | NA       | NA       | SJC_S000162 | NA     | NA     | NA | Sjp_0026760.1 | binding               | 0.052762 |
| unknown     | NA    | NA       | NA       | SJC_S000162 | NA     | NA     | NA | Sjp_0026770.1 | NA                    | NA       |
| unknown     | NA    | NA       | NA       | SJC_S000162 | NA     | NA     | NA | Sjp_0026780.1 | biological regulation | 0.76396  |
| unknown     | NA    | NA       | NA       | SJC_S000162 | NA     | NA     | NA | Sjp_0026790.1 | NA                    | NA       |
| unknown     | NA    | NA       | NA       | SJC_S000162 | NA     | NA     | NA | Sjp_0026800.1 | NA                    | NA       |
| unknown     | NA    | NA       | NA       | SJC_S000162 | NA     | NA     | NA | Sjp_0026810.1 | cell part             | 0.009037 |
| HSB10kb_340 | 1     | 11933539 | 11977267 | SJC_S000162 | 291464 | 341522 | -  | Sjp_0026830.1 | NA                    | NA       |
| HSB10kb_340 | 1     | 11933539 | 11977267 | SJC_S000162 | 291464 | 341522 | -  | Sjp_0026840.1 | NA                    | NA       |
| HSB10kb_340 | 1     | 11933539 | 11977267 | SJC_S000162 | 291464 | 341522 | -  | Sjp_0026850.1 | metabolic process     | 0.41934  |
| HSB10kb_340 | 1     | 11933539 | 11977267 | SJC_S000162 | 291464 | 341522 | -  | Sjp_0026860.1 | cell part             | 0.009037 |
| EBR10kb_217 | "1,6" | NA       | NA       | SJC_S000162 | 341523 | 387800 | NA | Sjp_0026860.1 | cell part             | 0.009037 |
| EBR10kb_217 | "1,6" | NA       | NA       | SJC_S000162 | 341523 | 387800 | NA | Sjp_0026870.1 | NA                    | NA       |
| EBR10kb_217 | "1,6" | NA       | NA       | SJC_S000162 | 341523 | 387800 | NA | Sjp_0026880.1 | NA                    | NA       |
| EBR10kb_217 | "1,6" | NA       | NA       | SJC_S000162 | 341523 | 387800 | NA | Sjp_0026900.1 | NA                    | NA       |

|             |    |          |          |             |        |        |    |               |                           |          |
|-------------|----|----------|----------|-------------|--------|--------|----|---------------|---------------------------|----------|
| HSB10kb_341 | 6  | 9681863  | 9701969  | SJC_S000162 | 387801 | 428862 | -  | Sjp_0026900.1 | NA                        | NA       |
| HSB10kb_341 | 6  | 9681863  | 9701969  | SJC_S000162 | 387801 | 428862 | -  | Sjp_0026910.1 | NA                        | NA       |
| unknown     | NA | NA       | NA       | SJC_S000163 | NA     | NA     | NA | Sjp_0026920.1 | NA                        | NA       |
| unknown     | NA | NA       | NA       | SJC_S000163 | NA     | NA     | NA | Sjp_0026930.1 | NA                        | NA       |
| unknown     | NA | NA       | NA       | SJC_S000163 | NA     | NA     | NA | Sjp_0026940.1 | catalytic activity        | 0.035844 |
| unknown     | NA | NA       | NA       | SJC_S000163 | NA     | NA     | NA | Sjp_0026950.1 | NA                        | NA       |
| unknown     | NA | NA       | NA       | SJC_S000163 | NA     | NA     | NA | Sjp_0026960.1 | NA                        | NA       |
| unknown     | NA | NA       | NA       | SJC_S000163 | NA     | NA     | NA | Sjp_0026970.1 | NA                        | NA       |
| unknown     | NA | NA       | NA       | SJC_S000163 | NA     | NA     | NA | Sjp_0026980.1 | NA                        | NA       |
| unknown     | NA | NA       | NA       | SJC_S000163 | NA     | NA     | NA | Sjp_0026990.1 | NA                        | NA       |
| unknown     | NA | NA       | NA       | SJC_S000163 | NA     | NA     | NA | Sjp_0027000.1 | NA                        | NA       |
| unknown     | NA | NA       | NA       | SJC_S000163 | NA     | NA     | NA | Sjp_0027010.1 | catalytic activity        | 0.035844 |
| unknown     | NA | NA       | NA       | SJC_S000163 | NA     | NA     | NA | Sjp_0027020.1 | NA                        | NA       |
| unknown     | NA | NA       | NA       | SJC_S000164 | NA     | NA     | NA | Sjp_0027030.1 | NA                        | NA       |
| unknown     | NA | NA       | NA       | SJC_S000164 | NA     | NA     | NA | Sjp_0027040.1 | NA                        | NA       |
| unknown     | NA | NA       | NA       | SJC_S000164 | NA     | NA     | NA | Sjp_0027050.1 | catalytic activity        | 0.035844 |
| unknown     | NA | NA       | NA       | SJC_S000164 | NA     | NA     | NA | Sjp_0027060.1 | biological regulation     | 0.76396  |
| HSB10kb_342 | WZ | 13295617 | 13307661 | SJC_S000164 | 78865  | 93966  | +  | Sjp_0027070.1 | cell part                 | 0.009037 |
| unknown     | NA | NA       | NA       | SJC_S000164 | NA     | NA     | NA | Sjp_0027080.1 | cell part                 | 0.009037 |
| unknown     | NA | NA       | NA       | SJC_S000164 | NA     | NA     | NA | Sjp_0027090.1 | cellular process          | 0.63852  |
| HSB10kb_343 | 3  | 18237948 | 18589339 | SJC_S000165 | 28322  | 317383 | -  | Sjp_0027100.1 | NA                        | NA       |
| HSB10kb_343 | 3  | 18237948 | 18589339 | SJC_S000165 | 28322  | 317383 | -  | Sjp_0027110.1 | NA                        | NA       |
| HSB10kb_343 | 3  | 18237948 | 18589339 | SJC_S000165 | 28322  | 317383 | -  | Sjp_0027120.1 | binding                   | 0.052762 |
| HSB10kb_343 | 3  | 18237948 | 18589339 | SJC_S000165 | 28322  | 317383 | -  | Sjp_0027140.1 | NA                        | NA       |
| HSB10kb_343 | 3  | 18237948 | 18589339 | SJC_S000165 | 28322  | 317383 | -  | Sjp_0027150.1 | NA                        | NA       |
| HSB10kb_343 | 3  | 18237948 | 18589339 | SJC_S000165 | 28322  | 317383 | -  | Sjp_0027160.1 | biological regulation     | 0.76396  |
| HSB10kb_343 | 3  | 18237948 | 18589339 | SJC_S000165 | 28322  | 317383 | -  | Sjp_0027180.1 | NA                        | NA       |
| HSB10kb_343 | 3  | 18237948 | 18589339 | SJC_S000165 | 28322  | 317383 | -  | Sjp_0027190.1 | NA                        | NA       |
| HSB10kb_343 | 3  | 18237948 | 18589339 | SJC_S000165 | 28322  | 317383 | -  | Sjp_0027200.1 | enzyme regulator activity | 0.1755   |
| HSB10kb_343 | 3  | 18237948 | 18589339 | SJC_S000165 | 28322  | 317383 | -  | Sjp_0027210.1 | NA                        | NA       |

|             |        |          |          |             |        |        |    |               |                                               |          |
|-------------|--------|----------|----------|-------------|--------|--------|----|---------------|-----------------------------------------------|----------|
| EBR10kb_218 | "3,3"  | NA       | NA       | SJC_S000165 | 317384 | 421707 | NA | Sjp_0027220.1 | NA                                            | NA       |
| EBR10kb_218 | "3,3"  | NA       | NA       | SJC_S000165 | 317384 | 421707 | NA | Sjp_0027230.1 | protein binding transcription factor activity | NA       |
| EBR10kb_218 | "3,3"  | NA       | NA       | SJC_S000165 | 317384 | 421707 | NA | Sjp_0027240.1 | NA                                            | NA       |
| EBR10kb_218 | "3,3"  | NA       | NA       | SJC_S000165 | 317384 | 421707 | NA | Sjp_0027250.1 | NA                                            | NA       |
| HSB10kb_344 | 3      | 18179232 | 18208901 | SJC_S000165 | 421708 | 464289 | -  | Sjp_0027250.1 | NA                                            | NA       |
| HSB10kb_344 | 3      | 18179232 | 18208901 | SJC_S000165 | 421708 | 464289 | -  | Sjp_0027260.1 | NA                                            | NA       |
| HSB10kb_344 | 3      | 18179232 | 18208901 | SJC_S000165 | 421708 | 464289 | -  | Sjp_0027270.1 | reproductive process                          | NA       |
| unknown     | NA     | NA       | NA       | SJC_S000165 | NA     | NA     | NA | Sjp_0027280.1 | NA                                            | NA       |
| unknown     | NA     | NA       | NA       | SJC_S000165 | NA     | NA     | NA | Sjp_0027290.1 | NA                                            | NA       |
| unknown     | NA     | NA       | NA       | SJC_S000165 | NA     | NA     | NA | Sjp_0027300.1 | NA                                            | NA       |
| unknown     | NA     | NA       | NA       | SJC_S000166 | NA     | NA     | NA | Sjp_0027310.1 | biological regulation                         | 0.76396  |
| unknown     | NA     | NA       | NA       | SJC_S000166 | NA     | NA     | NA | Sjp_0027320.1 | transporter activity                          | 0.782    |
| unknown     | NA     | NA       | NA       | SJC_S000166 | NA     | NA     | NA | Sjp_0027330.1 | catalytic activity                            | 0.035844 |
| HSB10kb_345 | 2      | 3436228  | 3463466  | SJC_S000166 | 104217 | 131836 | -  | Sjp_0027340.1 | NA                                            | NA       |
| EBR10kb_219 | "2,WZ" | NA       | NA       | SJC_S000166 | 131837 | 198432 | NA | Sjp_0027340.1 | NA                                            | NA       |
| EBR10kb_219 | "2,WZ" | NA       | NA       | SJC_S000166 | 131837 | 198432 | NA | Sjp_0027350.1 | NA                                            | NA       |
| EBR10kb_219 | "2,WZ" | NA       | NA       | SJC_S000166 | 131837 | 198432 | NA | Sjp_0027360.1 | binding                                       | 0.052762 |
| HSB10kb_346 | WZ     | 55011937 | 55254705 | SJC_S000166 | 198433 | 431196 | +  | Sjp_0027360.1 | binding                                       | 0.052762 |
| HSB10kb_346 | WZ     | 55011937 | 55254705 | SJC_S000166 | 198433 | 431196 | +  | Sjp_0027370.1 | cell part                                     | 0.009037 |
| HSB10kb_346 | WZ     | 55011937 | 55254705 | SJC_S000166 | 198433 | 431196 | +  | Sjp_0027380.1 | binding                                       | 0.052762 |
| HSB10kb_346 | WZ     | 55011937 | 55254705 | SJC_S000166 | 198433 | 431196 | +  | Sjp_0027390.1 | NA                                            | NA       |
| unknown     | NA     | NA       | NA       | SJC_S000167 | NA     | NA     | NA | Sjp_0027400.1 | binding                                       | 0.052762 |
| unknown     | NA     | NA       | NA       | SJC_S000167 | NA     | NA     | NA | Sjp_0027410.1 | cell part                                     | 0.009037 |
| unknown     | NA     | NA       | NA       | SJC_S000167 | NA     | NA     | NA | Sjp_0027420.1 | NA                                            | NA       |
| unknown     | NA     | NA       | NA       | SJC_S000167 | NA     | NA     | NA | Sjp_0027430.1 | NA                                            | NA       |
| unknown     | NA     | NA       | NA       | SJC_S000167 | NA     | NA     | NA | Sjp_0027440.1 | NA                                            | NA       |
| unknown     | NA     | NA       | NA       | SJC_S000167 | NA     | NA     | NA | Sjp_0027450.1 | cellular component organization or            | NA       |

|             |       |          |          |             |        |        |    |               |                               |          |
|-------------|-------|----------|----------|-------------|--------|--------|----|---------------|-------------------------------|----------|
|             |       |          |          |             |        |        |    |               | biogenesis                    |          |
| unknown     | NA    | NA       | NA       | SJC_S000167 | NA     | NA     | NA | Sjp_0027460.1 | enzyme regulator activity     | 0.1755   |
| unknown     | NA    | NA       | NA       | SJC_S000167 | NA     | NA     | NA | Sjp_0027470.1 | NA                            | NA       |
| unknown     | NA    | NA       | NA       | SJC_S000167 | NA     | NA     | NA | Sjp_0027480.1 | NA                            | NA       |
| unknown     | NA    | NA       | NA       | SJC_S000167 | NA     | NA     | NA | Sjp_0027490.1 | binding                       | 0.052762 |
| unknown     | NA    | NA       | NA       | SJC_S000167 | NA     | NA     | NA | Sjp_0027500.1 | establishment of localization | NA       |
| unknown     | NA    | NA       | NA       | SJC_S000167 | NA     | NA     | NA | Sjp_0027510.1 | NA                            | NA       |
| unknown     | NA    | NA       | NA       | SJC_S000167 | NA     | NA     | NA | Sjp_0027520.1 | NA                            | NA       |
| HSB10kb_347 | 7     | 1061865  | 1128033  | SJC_S000168 | 5186   | 91801  | +  | Sjp_0027530.1 | NA                            | NA       |
| EBR10kb_220 | "7,7" | NA       | NA       | SJC_S000168 | 91802  | 110659 | NA | Sjp_0027540.1 | NA                            | NA       |
| HSB10kb_348 | 7     | 1389517  | 1466039  | SJC_S000168 | 110660 | 173984 | -  | Sjp_0027540.1 | NA                            | NA       |
| EBR10kb_221 | "7,7" | NA       | NA       | SJC_S000168 | 173985 | 237047 | NA | Sjp_0027540.1 | NA                            | NA       |
| HSB10kb_349 | 7     | 5852163  | 6051934  | SJC_S000168 | 237048 | 452655 | -  | Sjp_0027560.1 | cell part                     | 0.009037 |
| HSB10kb_349 | 7     | 5852163  | 6051934  | SJC_S000168 | 237048 | 452655 | -  | Sjp_0027570.1 | NA                            | NA       |
| HSB10kb_349 | 7     | 5852163  | 6051934  | SJC_S000168 | 237048 | 452655 | -  | Sjp_0027580.1 | NA                            | NA       |
| EBR10kb_222 | "7,7" | NA       | NA       | SJC_S000168 | 452656 | 500238 | NA | Sjp_0027590.1 | catalytic activity            | 0.035844 |
| EBR10kb_222 | "7,7" | NA       | NA       | SJC_S000168 | 452656 | 500238 | NA | Sjp_0027600.1 | NA                            | NA       |
| HSB10kb_350 | 7     | 1280948  | 1334007  | SJC_S000168 | 500239 | 539662 | -  | Sjp_0027600.1 | NA                            | NA       |
| HSB10kb_350 | 7     | 1280948  | 1334007  | SJC_S000168 | 500239 | 539662 | -  | Sjp_0027610.1 | molecular transducer activity | 0.50162  |
| HSB10kb_350 | 7     | 1280948  | 1334007  | SJC_S000168 | 500239 | 539662 | -  | Sjp_0027620.1 | biological regulation         | 0.76396  |
| HSB10kb_351 | WZ    | 47930401 | 48031243 | SJC_S000169 | 7055   | 203043 | +  | Sjp_0027630.1 | biological regulation         | 0.76396  |
| HSB10kb_351 | WZ    | 47930401 | 48031243 | SJC_S000169 | 7055   | 203043 | +  | Sjp_0027640.1 | NA                            | NA       |
| HSB10kb_351 | WZ    | 47930401 | 48031243 | SJC_S000169 | 7055   | 203043 | +  | Sjp_0027650.1 | NA                            | NA       |
| HSB10kb_351 | WZ    | 47930401 | 48031243 | SJC_S000169 | 7055   | 203043 | +  | Sjp_0027660.1 | NA                            | NA       |
| HSB10kb_351 | WZ    | 47930401 | 48031243 | SJC_S000169 | 7055   | 203043 | +  | Sjp_0027670.1 | molecular transducer activity | 0.50162  |

|             |         |          |          |             |        |        |    |               |                                               |          |
|-------------|---------|----------|----------|-------------|--------|--------|----|---------------|-----------------------------------------------|----------|
| HSB10kb_351 | WZ      | 47930401 | 48031243 | SJC_S000169 | 7055   | 203043 | +  | Sjp_0027680.1 | catalytic activity                            | 0.035844 |
| EBR10kb_223 | "WZ,WZ" | NA       | NA       | SJC_S000169 | 203044 | 216432 | NA | NA            | NA                                            | NA       |
| HSB10kb_352 | WZ      | 47730688 | 47744812 | SJC_S000169 | 216433 | 232512 | -  | Sjp_0027690.1 | cellular component organization or biogenesis | NA       |
| EBR10kb_224 | "WZ,1"  | NA       | NA       | SJC_S000169 | 232513 | 402239 | NA | Sjp_0027690.1 | cellular component organization or biogenesis | NA       |
| EBR10kb_224 | "WZ,1"  | NA       | NA       | SJC_S000169 | 232513 | 402239 | NA | Sjp_0027700.1 | cell part                                     | 0.009037 |
| EBR10kb_224 | "WZ,1"  | NA       | NA       | SJC_S000169 | 232513 | 402239 | NA | Sjp_0027710.1 | cell part                                     | 0.009037 |
| EBR10kb_224 | "WZ,1"  | NA       | NA       | SJC_S000169 | 232513 | 402239 | NA | Sjp_0027720.1 | establishment of localization                 | NA       |
| EBR10kb_224 | "WZ,1"  | NA       | NA       | SJC_S000169 | 232513 | 402239 | NA | Sjp_0027730.1 | protein binding transcription factor activity | NA       |
| HSB10kb_353 | 1       | 62784513 | 62910318 | SJC_S000169 | 402240 | 493861 | -  | Sjp_0027730.1 | protein binding transcription factor activity | NA       |
| HSB10kb_353 | 1       | 62784513 | 62910318 | SJC_S000169 | 402240 | 493861 | -  | Sjp_0027740.1 | NA                                            | NA       |
| HSB10kb_353 | 1       | 62784513 | 62910318 | SJC_S000169 | 402240 | 493861 | -  | Sjp_0027750.1 | NA                                            | NA       |
| unknown     | NA      | NA       | NA       | SJC_S000170 | NA     | NA     | NA | Sjp_0027760.1 | NA                                            | NA       |
| unknown     | NA      | NA       | NA       | SJC_S000170 | NA     | NA     | NA | Sjp_0027770.1 | NA                                            | NA       |
| unknown     | NA      | NA       | NA       | SJC_S000170 | NA     | NA     | NA | Sjp_0027780.1 | NA                                            | NA       |
| unknown     | NA      | NA       | NA       | SJC_S000170 | NA     | NA     | NA | Sjp_0027790.1 | NA                                            | NA       |
| unknown     | NA      | NA       | NA       | SJC_S000170 | NA     | NA     | NA | Sjp_0027800.1 | biological regulation                         | 0.76396  |
| unknown     | NA      | NA       | NA       | SJC_S000170 | NA     | NA     | NA | Sjp_0027810.1 | biological regulation                         | 0.76396  |
| unknown     | NA      | NA       | NA       | SJC_S000170 | NA     | NA     | NA | Sjp_0027820.1 | biological regulation                         | 0.76396  |
| unknown     | NA      | NA       | NA       | SJC_S000171 | NA     | NA     | NA | Sjp_0027830.1 | cell part                                     | 0.009037 |
| unknown     | NA      | NA       | NA       | SJC_S000171 | NA     | NA     | NA | Sjp_0027840.1 | NA                                            | NA       |
| unknown     | NA      | NA       | NA       | SJC_S000171 | NA     | NA     | NA | Sjp_0027850.1 | NA                                            | NA       |

|             |    |          |          |             |        |        |    |               |                       |          |
|-------------|----|----------|----------|-------------|--------|--------|----|---------------|-----------------------|----------|
| unknown     | NA | NA       | NA       | SJC_S000171 | NA     | NA     | NA | Sjp_0027860.1 | NA                    | NA       |
| unknown     | NA | NA       | NA       | SJC_S000171 | NA     | NA     | NA | Sjp_0027870.1 | NA                    | NA       |
| HSB10kb_354 | 1  | 63433055 | 63454831 | SJC_S000171 | 299600 | 319030 | -  | Sjp_0027880.1 | NA                    | NA       |
| unknown     | NA | NA       | NA       | SJC_S000172 | NA     | NA     | NA | Sjp_0027890.1 | NA                    | NA       |
| unknown     | NA | NA       | NA       | SJC_S000172 | NA     | NA     | NA | Sjp_0027900.1 | NA                    | NA       |
| unknown     | NA | NA       | NA       | SJC_S000172 | NA     | NA     | NA | Sjp_0027910.1 | NA                    | NA       |
| HSB10kb_355 | 4  | 16485340 | 16819987 | SJC_S000172 | 47366  | 485996 | +  | Sjp_0027920.1 | NA                    | NA       |
| HSB10kb_355 | 4  | 16485340 | 16819987 | SJC_S000172 | 47366  | 485996 | +  | Sjp_0027930.1 | catalytic activity    | 0.035844 |
| HSB10kb_355 | 4  | 16485340 | 16819987 | SJC_S000172 | 47366  | 485996 | +  | Sjp_0027940.1 | cellular process      | 0.63852  |
| HSB10kb_355 | 4  | 16485340 | 16819987 | SJC_S000172 | 47366  | 485996 | +  | Sjp_0027950.1 | NA                    | NA       |
| HSB10kb_355 | 4  | 16485340 | 16819987 | SJC_S000172 | 47366  | 485996 | +  | Sjp_0027960.1 | NA                    | NA       |
| HSB10kb_355 | 4  | 16485340 | 16819987 | SJC_S000172 | 47366  | 485996 | +  | Sjp_0027970.1 | NA                    | NA       |
| HSB10kb_355 | 4  | 16485340 | 16819987 | SJC_S000172 | 47366  | 485996 | +  | Sjp_0027980.1 | NA                    | NA       |
| HSB10kb_355 | 4  | 16485340 | 16819987 | SJC_S000172 | 47366  | 485996 | +  | Sjp_0027990.1 | cell part             | 0.009037 |
| HSB10kb_355 | 4  | 16485340 | 16819987 | SJC_S000172 | 47366  | 485996 | +  | Sjp_0028000.1 | binding               | 0.052762 |
| HSB10kb_355 | 4  | 16485340 | 16819987 | SJC_S000172 | 47366  | 485996 | +  | Sjp_0028010.1 | NA                    | NA       |
| HSB10kb_355 | 4  | 16485340 | 16819987 | SJC_S000172 | 47366  | 485996 | +  | Sjp_0028020.1 | cellular process      | 0.63852  |
| HSB10kb_355 | 4  | 16485340 | 16819987 | SJC_S000172 | 47366  | 485996 | +  | Sjp_0028030.1 | cell part             | 0.009037 |
| HSB10kb_355 | 4  | 16485340 | 16819987 | SJC_S000172 | 47366  | 485996 | +  | Sjp_0028040.1 | cell part             | 0.009037 |
| HSB10kb_355 | 4  | 16485340 | 16819987 | SJC_S000172 | 47366  | 485996 | +  | Sjp_0028050.1 | catalytic activity    | 0.035844 |
| unknown     | NA | NA       | NA       | SJC_S000172 | NA     | NA     | NA | Sjp_0028060.1 | NA                    | NA       |
| unknown     | NA | NA       | NA       | SJC_S000173 | NA     | NA     | NA | Sjp_0028070.1 | transporter activity  | 0.782    |
| unknown     | NA | NA       | NA       | SJC_S000173 | NA     | NA     | NA | Sjp_0028080.1 | transporter activity  | 0.782    |
| unknown     | NA | NA       | NA       | SJC_S000173 | NA     | NA     | NA | Sjp_0028090.1 | NA                    | NA       |
| unknown     | NA | NA       | NA       | SJC_S000173 | NA     | NA     | NA | Sjp_0028100.1 | binding               | 0.052762 |
| unknown     | NA | NA       | NA       | SJC_S000173 | NA     | NA     | NA | Sjp_0028110.1 | NA                    | NA       |
| unknown     | NA | NA       | NA       | SJC_S000173 | NA     | NA     | NA | Sjp_0028120.1 | biological regulation | 0.76396  |
| unknown     | NA | NA       | NA       | SJC_S000173 | NA     | NA     | NA | Sjp_0028130.1 | NA                    | NA       |
| unknown     | NA | NA       | NA       | SJC_S000173 | NA     | NA     | NA | Sjp_0028140.1 | NA                    | NA       |
| unknown     | NA | NA       | NA       | SJC_S000173 | NA     | NA     | NA | Sjp_0028150.1 | catalytic activity    | 0.035844 |
| unknown     | NA | NA       | NA       | SJC_S000173 | NA     | NA     | NA | Sjp_0028160.1 | catalytic activity    | 0.035844 |



|             |    |          |          |             |        |        |    |               |                                               |          |
|-------------|----|----------|----------|-------------|--------|--------|----|---------------|-----------------------------------------------|----------|
| unknown     | NA | NA       | NA       | SJC_S000173 | NA     | NA     | NA | Sjp_0028170.1 | NA                                            | NA       |
| unknown     | NA | NA       | NA       | SJC_S000173 | NA     | NA     | NA | Sjp_0028180.1 | biological regulation                         | 0.76396  |
| unknown     | NA | NA       | NA       | SJC_S000173 | NA     | NA     | NA | Sjp_0028190.1 | NA                                            | NA       |
| unknown     | NA | NA       | NA       | SJC_S000173 | NA     | NA     | NA | Sjp_0028200.1 | catalytic activity                            | 0.035844 |
| unknown     | NA | NA       | NA       | SJC_S000174 | NA     | NA     | NA | Sjp_0028210.1 | NA                                            | NA       |
| unknown     | NA | NA       | NA       | SJC_S000174 | NA     | NA     | NA | Sjp_0028220.1 | NA                                            | NA       |
| unknown     | NA | NA       | NA       | SJC_S000174 | NA     | NA     | NA | Sjp_0028230.1 | binding                                       | 0.052762 |
| unknown     | NA | NA       | NA       | SJC_S000174 | NA     | NA     | NA | Sjp_0028240.1 | binding                                       | 0.052762 |
| unknown     | NA | NA       | NA       | SJC_S000174 | NA     | NA     | NA | Sjp_0028250.1 | catalytic activity                            | 0.035844 |
| HSB10kb_356 | 2  | 22992024 | 23070037 | SJC_S000174 | 223330 | 267275 | -  | Sjp_0028260.1 | protein binding transcription factor activity | NA       |
| HSB10kb_356 | 2  | 22992024 | 23070037 | SJC_S000174 | 223330 | 267275 | -  | Sjp_0028270.1 | NA                                            | NA       |
| unknown     | NA | NA       | NA       | SJC_S000174 | NA     | NA     | NA | Sjp_0028280.1 | NA                                            | NA       |
| HSB10kb_357 | 6  | 17575145 | 17708414 | SJC_S000175 | 5219   | 116937 | +  | Sjp_0028290.1 | reproductive process                          | NA       |
| HSB10kb_357 | 6  | 17575145 | 17708414 | SJC_S000175 | 5219   | 116937 | +  | Sjp_0028300.1 | cellular process                              | 0.63852  |
| HSB10kb_357 | 6  | 17575145 | 17708414 | SJC_S000175 | 5219   | 116937 | +  | Sjp_0028310.1 | catalytic activity                            | 0.035844 |
| HSB10kb_357 | 6  | 17575145 | 17708414 | SJC_S000175 | 5219   | 116937 | +  | Sjp_0028320.1 | metabolic process                             | 0.41934  |
| HSB10kb_357 | 6  | 17575145 | 17708414 | SJC_S000175 | 5219   | 116937 | +  | Sjp_0028330.1 | NA                                            | NA       |
| HSB10kb_357 | 6  | 17575145 | 17708414 | SJC_S000175 | 5219   | 116937 | +  | Sjp_0028340.1 | NA                                            | NA       |
| HSB10kb_357 | 6  | 17575145 | 17708414 | SJC_S000175 | 5219   | 116937 | +  | Sjp_0028350.1 | NA                                            | NA       |
| HSB10kb_357 | 6  | 17575145 | 17708414 | SJC_S000175 | 5219   | 116937 | +  | Sjp_0028360.1 | catalytic activity                            | 0.035844 |
| unknown     | NA | NA       | NA       | SJC_S000175 | NA     | NA     | NA | Sjp_0028370.1 | NA                                            | NA       |
| unknown     | NA | NA       | NA       | SJC_S000175 | NA     | NA     | NA | Sjp_0028380.1 | NA                                            | NA       |
| unknown     | NA | NA       | NA       | SJC_S000176 | NA     | NA     | NA | Sjp_0028390.1 | NA                                            | NA       |
| HSB10kb_358 | 7  | 2133403  | 2347007  | SJC_S000176 | 63077  | 237990 | -  | Sjp_0028400.1 | NA                                            | NA       |
| HSB10kb_358 | 7  | 2133403  | 2347007  | SJC_S000176 | 63077  | 237990 | -  | Sjp_0028410.1 | NA                                            | NA       |
| HSB10kb_358 | 7  | 2133403  | 2347007  | SJC_S000176 | 63077  | 237990 | -  | Sjp_0028420.1 | NA                                            | NA       |
| HSB10kb_358 | 7  | 2133403  | 2347007  | SJC_S000176 | 63077  | 237990 | -  | Sjp_0028430.1 | catalytic activity                            | 0.035844 |
| unknown     | NA | NA       | NA       | SJC_S000176 | NA     | NA     | NA | Sjp_0028440.1 | NA                                            | NA       |
| unknown     | NA | NA       | NA       | SJC_S000176 | NA     | NA     | NA | Sjp_0028450.1 | NA                                            | NA       |

|             |       |          |          |             |        |        |    |               |                                  |          |
|-------------|-------|----------|----------|-------------|--------|--------|----|---------------|----------------------------------|----------|
| HSB10kb_359 | WZ    | 36330815 | 36519775 | SJC_S000177 | 16956  | 168849 | -  | Sjp_0028460.1 | NA                               | NA       |
| HSB10kb_359 | WZ    | 36330815 | 36519775 | SJC_S000177 | 16956  | 168849 | -  | Sjp_0028470.1 | NA                               | NA       |
| HSB10kb_359 | WZ    | 36330815 | 36519775 | SJC_S000177 | 16956  | 168849 | -  | Sjp_0028480.1 | establishment of localization    | NA       |
| HSB10kb_359 | WZ    | 36330815 | 36519775 | SJC_S000177 | 16956  | 168849 | -  | Sjp_0028490.1 | NA                               | NA       |
| HSB10kb_359 | WZ    | 36330815 | 36519775 | SJC_S000177 | 16956  | 168849 | -  | Sjp_0028500.1 | NA                               | NA       |
| HSB10kb_359 | WZ    | 36330815 | 36519775 | SJC_S000177 | 16956  | 168849 | -  | Sjp_0028510.1 | catalytic activity               | 0.035844 |
| HSB10kb_359 | WZ    | 36330815 | 36519775 | SJC_S000177 | 16956  | 168849 | -  | Sjp_0028520.1 | NA                               | NA       |
| HSB10kb_359 | WZ    | 36330815 | 36519775 | SJC_S000177 | 16956  | 168849 | -  | Sjp_0028530.1 | NA                               | NA       |
| unknown     | NA    | NA       | NA       | SJC_S000177 | NA     | NA     | NA | Sjp_0028540.1 | NA                               | NA       |
| HSB10kb_360 | 2     | 24640138 | 24688315 | SJC_S000178 | 80752  | 113093 | -  | Sjp_0028550.1 | NA                               | NA       |
| HSB10kb_360 | 2     | 24640138 | 24688315 | SJC_S000178 | 80752  | 113093 | -  | Sjp_0028560.1 | catalytic activity               | 0.035844 |
| EBR10kb_225 | "2,2" | NA       | NA       | SJC_S000178 | 113094 | 125698 | NA | Sjp_0028560.1 | catalytic activity               | 0.035844 |
| HSB10kb_361 | 2     | 24504343 | 24518271 | SJC_S000178 | 125699 | 142386 | +  | Sjp_0028570.1 | transcription regulator activity | NA       |
| unknown     | NA    | NA       | NA       | SJC_S000179 | NA     | NA     | NA | Sjp_0028580.1 | biological regulation            | 0.76396  |
| HSB10kb_362 | 1     | 5726209  | 6011287  | SJC_S000180 | 27345  | 284347 | +  | Sjp_0028590.1 | catalytic activity               | 0.035844 |
| HSB10kb_362 | 1     | 5726209  | 6011287  | SJC_S000180 | 27345  | 284347 | +  | Sjp_0028600.1 | cell part                        | 0.009037 |
| HSB10kb_362 | 1     | 5726209  | 6011287  | SJC_S000180 | 27345  | 284347 | +  | Sjp_0028610.1 | catalytic activity               | 0.035844 |
| HSB10kb_362 | 1     | 5726209  | 6011287  | SJC_S000180 | 27345  | 284347 | +  | Sjp_0028620.1 | cell part                        | 0.009037 |
| HSB10kb_362 | 1     | 5726209  | 6011287  | SJC_S000180 | 27345  | 284347 | +  | Sjp_0028630.1 | NA                               | NA       |
| HSB10kb_362 | 1     | 5726209  | 6011287  | SJC_S000180 | 27345  | 284347 | +  | Sjp_0028640.1 | catalytic activity               | 0.035844 |
| HSB10kb_362 | 1     | 5726209  | 6011287  | SJC_S000180 | 27345  | 284347 | +  | Sjp_0028650.1 | cellular process                 | 0.63852  |
| HSB10kb_362 | 1     | 5726209  | 6011287  | SJC_S000180 | 27345  | 284347 | +  | Sjp_0028660.1 | NA                               | NA       |
| HSB10kb_362 | 1     | 5726209  | 6011287  | SJC_S000180 | 27345  | 284347 | +  | Sjp_0028670.1 | transcription regulator activity | NA       |
| HSB10kb_362 | 1     | 5726209  | 6011287  | SJC_S000180 | 27345  | 284347 | +  | Sjp_0028680.1 | NA                               | NA       |
| HSB10kb_362 | 1     | 5726209  | 6011287  | SJC_S000180 | 27345  | 284347 | +  | Sjp_0028690.1 | NA                               | NA       |
| HSB10kb_362 | 1     | 5726209  | 6011287  | SJC_S000180 | 27345  | 284347 | +  | Sjp_0028700.1 | NA                               | NA       |
| HSB10kb_362 | 1     | 5726209  | 6011287  | SJC_S000180 | 27345  | 284347 | +  | Sjp_0028710.1 | catalytic activity               | 0.035844 |
| EBR10kb_226 | "1,1" | NA       | NA       | SJC_S000180 | 284348 | 318855 | NA | Sjp_0028720.1 | NA                               | NA       |

|             |       |          |          |             |        |        |    |               |                       |          |
|-------------|-------|----------|----------|-------------|--------|--------|----|---------------|-----------------------|----------|
| HSB10kb_363 | 1     | 3176854  | 3444309  | SJC_S000180 | 318856 | 586928 | -  | Sjp_0028720.1 | NA                    | NA       |
| HSB10kb_363 | 1     | 3176854  | 3444309  | SJC_S000180 | 318856 | 586928 | -  | Sjp_0028730.1 | cell part             | 0.009037 |
| HSB10kb_363 | 1     | 3176854  | 3444309  | SJC_S000180 | 318856 | 586928 | -  | Sjp_0028740.1 | NA                    | NA       |
| HSB10kb_363 | 1     | 3176854  | 3444309  | SJC_S000180 | 318856 | 586928 | -  | Sjp_0028750.1 | NA                    | NA       |
| HSB10kb_363 | 1     | 3176854  | 3444309  | SJC_S000180 | 318856 | 586928 | -  | Sjp_0028760.1 | catalytic activity    | 0.035844 |
| HSB10kb_363 | 1     | 3176854  | 3444309  | SJC_S000180 | 318856 | 586928 | -  | Sjp_0028770.1 | NA                    | NA       |
| HSB10kb_363 | 1     | 3176854  | 3444309  | SJC_S000180 | 318856 | 586928 | -  | Sjp_0028780.1 | NA                    | NA       |
| HSB10kb_363 | 1     | 3176854  | 3444309  | SJC_S000180 | 318856 | 586928 | -  | Sjp_0028790.1 | NA                    | NA       |
| HSB10kb_364 | 1     | 9548211  | 9583276  | SJC_S000181 | 3244   | 44815  | +  | Sjp_0028800.1 | response to stimulus  | NA       |
| HSB10kb_364 | 1     | 9548211  | 9583276  | SJC_S000181 | 3244   | 44815  | +  | Sjp_0028810.1 | biological regulation | 0.76396  |
| EBR10kb_227 | "1,1" | NA       | NA       | SJC_S000181 | 44816  | 52342  | NA | Sjp_0028810.1 | biological regulation | 0.76396  |
| EBR10kb_227 | "1,1" | NA       | NA       | SJC_S000181 | 44816  | 52342  | NA | Sjp_0028820.1 | NA                    | NA       |
| HSB10kb_365 | 1     | 9513826  | 9533146  | SJC_S000181 | 52343  | 74910  | +  | Sjp_0028820.1 | NA                    | NA       |
| HSB10kb_365 | 1     | 9513826  | 9533146  | SJC_S000181 | 52343  | 74910  | +  | Sjp_0028830.1 | NA                    | NA       |
| EBR10kb_228 | "1,1" | NA       | NA       | SJC_S000181 | 74911  | 161501 | NA | Sjp_0028830.1 | NA                    | NA       |
| EBR10kb_228 | "1,1" | NA       | NA       | SJC_S000181 | 74911  | 161501 | NA | Sjp_0028840.1 | NA                    | NA       |
| HSB10kb_366 | 1     | 9613152  | 9744512  | SJC_S000181 | 161502 | 291656 | +  | Sjp_0028840.1 | NA                    | NA       |
| HSB10kb_366 | 1     | 9613152  | 9744512  | SJC_S000181 | 161502 | 291656 | +  | Sjp_0028850.1 | binding               | 0.052762 |
| HSB10kb_366 | 1     | 9613152  | 9744512  | SJC_S000181 | 161502 | 291656 | +  | Sjp_0028860.1 | binding               | 0.052762 |
| HSB10kb_366 | 1     | 9613152  | 9744512  | SJC_S000181 | 161502 | 291656 | +  | Sjp_0028870.1 | catalytic activity    | 0.035844 |
| HSB10kb_367 | 2     | 17033767 | 17288893 | SJC_S000182 | 5806   | 192622 | -  | Sjp_0028890.1 | metabolic process     | 0.41934  |
| HSB10kb_367 | 2     | 17033767 | 17288893 | SJC_S000182 | 5806   | 192622 | -  | Sjp_0028900.1 | NA                    | NA       |
| HSB10kb_367 | 2     | 17033767 | 17288893 | SJC_S000182 | 5806   | 192622 | -  | Sjp_0028910.1 | transporter activity  | 0.782    |
| HSB10kb_367 | 2     | 17033767 | 17288893 | SJC_S000182 | 5806   | 192622 | -  | Sjp_0028920.1 | NA                    | NA       |
| HSB10kb_367 | 2     | 17033767 | 17288893 | SJC_S000182 | 5806   | 192622 | -  | Sjp_0028930.1 | catalytic activity    | 0.035844 |
| HSB10kb_367 | 2     | 17033767 | 17288893 | SJC_S000182 | 5806   | 192622 | -  | Sjp_0028940.1 | binding               | 0.052762 |
| HSB10kb_367 | 2     | 17033767 | 17288893 | SJC_S000182 | 5806   | 192622 | -  | Sjp_0028950.1 | catalytic activity    | 0.035844 |
| HSB10kb_367 | 2     | 17033767 | 17288893 | SJC_S000182 | 5806   | 192622 | -  | Sjp_0028960.1 | cell part             | 0.009037 |
| HSB10kb_367 | 2     | 17033767 | 17288893 | SJC_S000182 | 5806   | 192622 | -  | Sjp_0028970.1 | NA                    | NA       |

|             |         |          |          |             |       |        |    |               |                       |          |
|-------------|---------|----------|----------|-------------|-------|--------|----|---------------|-----------------------|----------|
| HSB10kb_367 | 2       | 17033767 | 17288893 | SJC_S000182 | 5806  | 192622 | -  | Sjp_0028980.1 | NA                    | NA       |
| unknown     | NA      | NA       | NA       | SJC_S000182 | NA    | NA     | NA | Sjp_0028990.1 | NA                    | NA       |
| unknown     | NA      | NA       | NA       | SJC_S000182 | NA    | NA     | NA | Sjp_0029000.1 | cell part             | 0.009037 |
| unknown     | NA      | NA       | NA       | SJC_S000182 | NA    | NA     | NA | Sjp_0029010.1 | catalytic activity    | 0.035844 |
| unknown     | NA      | NA       | NA       | SJC_S000183 | NA    | NA     | NA | Sjp_0029020.1 | catalytic activity    | 0.035844 |
| unknown     | NA      | NA       | NA       | SJC_S000183 | NA    | NA     | NA | Sjp_0029030.1 | NA                    | NA       |
| unknown     | NA      | NA       | NA       | SJC_S000183 | NA    | NA     | NA | Sjp_0029040.1 | NA                    | NA       |
| unknown     | NA      | NA       | NA       | SJC_S000183 | NA    | NA     | NA | Sjp_0029050.1 | NA                    | NA       |
| HSB10kb_368 | WZ      | 6927850  | 7323647  | SJC_S000184 | 3382  | 423612 | -  | Sjp_0029060.1 | NA                    | NA       |
| HSB10kb_368 | WZ      | 6927850  | 7323647  | SJC_S000184 | 3382  | 423612 | -  | Sjp_0029070.1 | NA                    | NA       |
| HSB10kb_368 | WZ      | 6927850  | 7323647  | SJC_S000184 | 3382  | 423612 | -  | Sjp_0029080.1 | binding               | 0.052762 |
| HSB10kb_368 | WZ      | 6927850  | 7323647  | SJC_S000184 | 3382  | 423612 | -  | Sjp_0029090.1 | biological regulation | 0.76396  |
| HSB10kb_368 | WZ      | 6927850  | 7323647  | SJC_S000184 | 3382  | 423612 | -  | Sjp_0029100.1 | biological regulation | 0.76396  |
| HSB10kb_368 | WZ      | 6927850  | 7323647  | SJC_S000184 | 3382  | 423612 | -  | Sjp_0029110.1 | NA                    | NA       |
| HSB10kb_368 | WZ      | 6927850  | 7323647  | SJC_S000184 | 3382  | 423612 | -  | Sjp_0029120.1 | NA                    | NA       |
| HSB10kb_368 | WZ      | 6927850  | 7323647  | SJC_S000184 | 3382  | 423612 | -  | Sjp_0029130.1 | NA                    | NA       |
| HSB10kb_368 | WZ      | 6927850  | 7323647  | SJC_S000184 | 3382  | 423612 | -  | Sjp_0029140.1 | catalytic activity    | 0.035844 |
| HSB10kb_368 | WZ      | 6927850  | 7323647  | SJC_S000184 | 3382  | 423612 | -  | Sjp_0029150.1 | NA                    | NA       |
| HSB10kb_368 | WZ      | 6927850  | 7323647  | SJC_S000184 | 3382  | 423612 | -  | Sjp_0029160.1 | transporter activity  | 0.782    |
| HSB10kb_368 | WZ      | 6927850  | 7323647  | SJC_S000184 | 3382  | 423612 | -  | Sjp_0029170.1 | NA                    | NA       |
| unknown     | NA      | NA       | NA       | SJC_S000184 | NA    | NA     | NA | Sjp_0029180.1 | NA                    | NA       |
| HSB10kb_369 | WZ      | 48969573 | 49045858 | SJC_S000185 | 752   | 50454  | +  | Sjp_0029190.1 | NA                    | NA       |
| HSB10kb_369 | WZ      | 48969573 | 49045858 | SJC_S000185 | 752   | 50454  | +  | Sjp_0029200.1 | catalytic activity    | 0.035844 |
| HSB10kb_369 | WZ      | 48969573 | 49045858 | SJC_S000185 | 752   | 50454  | +  | Sjp_0029210.1 | NA                    | NA       |
| EBR10kb_229 | "WZ,WZ" | NA       | NA       | SJC_S000185 | 50455 | 62729  | NA | Sjp_0029210.1 | NA                    | NA       |
| EBR10kb_229 | "WZ,WZ" | NA       | NA       | SJC_S000185 | 50455 | 62729  | NA | Sjp_0029220.1 | cell part             | 0.009037 |
| HSB10kb_370 | WZ      | 48471271 | 48964418 | SJC_S000185 | 62730 | 447503 | -  | Sjp_0029220.1 | cell part             | 0.009037 |
| HSB10kb_370 | WZ      | 48471271 | 48964418 | SJC_S000185 | 62730 | 447503 | -  | Sjp_0029230.1 | cell part             | 0.009037 |
| HSB10kb_370 | WZ      | 48471271 | 48964418 | SJC_S000185 | 62730 | 447503 | -  | Sjp_0029240.1 | NA                    | NA       |
| HSB10kb_370 | WZ      | 48471271 | 48964418 | SJC_S000185 | 62730 | 447503 | -  | Sjp_0029250.1 | NA                    | NA       |
| HSB10kb_370 | WZ      | 48471271 | 48964418 | SJC_S000185 | 62730 | 447503 | -  | Sjp_0029260.1 | NA                    | NA       |

|             |       |          |          |             |        |        |    |               |                       |          |
|-------------|-------|----------|----------|-------------|--------|--------|----|---------------|-----------------------|----------|
| HSB10kb_370 | WZ    | 48471271 | 48964418 | SJC_S000185 | 62730  | 447503 | -  | Sjp_0029270.1 | NA                    | NA       |
| HSB10kb_370 | WZ    | 48471271 | 48964418 | SJC_S000185 | 62730  | 447503 | -  | Sjp_0029280.1 | NA                    | NA       |
| HSB10kb_370 | WZ    | 48471271 | 48964418 | SJC_S000185 | 62730  | 447503 | -  | Sjp_0029290.1 | NA                    | NA       |
| HSB10kb_370 | WZ    | 48471271 | 48964418 | SJC_S000185 | 62730  | 447503 | -  | Sjp_0029300.1 | NA                    | NA       |
| HSB10kb_371 | 1     | 33153024 | 33203435 | SJC_S000186 | 20256  | 72375  | -  | Sjp_0029310.1 | response to stimulus  | NA       |
| HSB10kb_371 | 1     | 33153024 | 33203435 | SJC_S000186 | 20256  | 72375  | -  | Sjp_0029320.1 | metabolic process     | 0.41934  |
| HSB10kb_371 | 1     | 33153024 | 33203435 | SJC_S000186 | 20256  | 72375  | -  | Sjp_0029330.1 | NA                    | NA       |
| EBR10kb_230 | "1,1" | NA       | NA       | SJC_S000186 | 72376  | 138111 | NA | Sjp_0029330.1 | NA                    | NA       |
| EBR10kb_230 | "1,1" | NA       | NA       | SJC_S000186 | 72376  | 138111 | NA | Sjp_0029340.1 | binding               | 0.052762 |
| HSB10kb_372 | 1     | 33308201 | 33514957 | SJC_S000186 | 138112 | 380568 | +  | Sjp_0029350.1 | NA                    | NA       |
| HSB10kb_372 | 1     | 33308201 | 33514957 | SJC_S000186 | 138112 | 380568 | +  | Sjp_0029360.1 | NA                    | NA       |
| HSB10kb_372 | 1     | 33308201 | 33514957 | SJC_S000186 | 138112 | 380568 | +  | Sjp_0029370.1 | NA                    | NA       |
| HSB10kb_372 | 1     | 33308201 | 33514957 | SJC_S000186 | 138112 | 380568 | +  | Sjp_0029380.1 | NA                    | NA       |
| HSB10kb_372 | 1     | 33308201 | 33514957 | SJC_S000186 | 138112 | 380568 | +  | Sjp_0029390.1 | NA                    | NA       |
| HSB10kb_372 | 1     | 33308201 | 33514957 | SJC_S000186 | 138112 | 380568 | +  | Sjp_0029400.1 | biological regulation | 0.76396  |
| HSB10kb_372 | 1     | 33308201 | 33514957 | SJC_S000186 | 138112 | 380568 | +  | Sjp_0029410.1 | NA                    | NA       |
| HSB10kb_372 | 1     | 33308201 | 33514957 | SJC_S000186 | 138112 | 380568 | +  | Sjp_0029420.1 | catalytic activity    | 0.035844 |
| HSB10kb_373 | 2     | 8720515  | 8857898  | SJC_S000187 | 16170  | 190679 | +  | Sjp_0029430.1 | NA                    | NA       |
| HSB10kb_373 | 2     | 8720515  | 8857898  | SJC_S000187 | 16170  | 190679 | +  | Sjp_0029440.1 | NA                    | NA       |
| HSB10kb_373 | 2     | 8720515  | 8857898  | SJC_S000187 | 16170  | 190679 | +  | Sjp_0029450.1 | NA                    | NA       |
| HSB10kb_373 | 2     | 8720515  | 8857898  | SJC_S000187 | 16170  | 190679 | +  | Sjp_0029460.1 | catalytic activity    | 0.035844 |
| HSB10kb_373 | 2     | 8720515  | 8857898  | SJC_S000187 | 16170  | 190679 | +  | Sjp_0029470.1 | NA                    | NA       |
| HSB10kb_373 | 2     | 8720515  | 8857898  | SJC_S000187 | 16170  | 190679 | +  | Sjp_0029480.1 | NA                    | NA       |
| HSB10kb_373 | 2     | 8720515  | 8857898  | SJC_S000187 | 16170  | 190679 | +  | Sjp_0029490.1 | NA                    | NA       |
| EBR10kb_231 | "2,1" | NA       | NA       | SJC_S000187 | 190680 | 231105 | NA | Sjp_0029490.1 | NA                    | NA       |
| EBR10kb_231 | "2,1" | NA       | NA       | SJC_S000187 | 190680 | 231105 | NA | Sjp_0029500.1 | binding               | 0.052762 |
| HSB10kb_374 | 1     | 11713818 | 11733239 | SJC_S000187 | 231106 | 253456 | -  | Sjp_0029500.1 | binding               | 0.052762 |
| HSB10kb_374 | 1     | 11713818 | 11733239 | SJC_S000187 | 231106 | 253456 | -  | Sjp_0029510.1 | NA                    | NA       |
| HSB10kb_374 | 1     | 11713818 | 11733239 | SJC_S000187 | 231106 | 253456 | -  | Sjp_0029520.1 | NA                    | NA       |
| unknown     | NA    | NA       | NA       | SJC_S000187 | NA     | NA     | NA | Sjp_0029530.1 | NA                    | NA       |
| unknown     | NA    | NA       | NA       | SJC_S000187 | NA     | NA     | NA | Sjp_0029540.1 | NA                    | NA       |

|             |       |          |          |             |        |        |    |               |                               |          |
|-------------|-------|----------|----------|-------------|--------|--------|----|---------------|-------------------------------|----------|
| unknown     | NA    | NA       | NA       | SJC_S000187 | NA     | NA     | NA | Sjp_0029550.1 | cellular process              | 0.63852  |
| unknown     | NA    | NA       | NA       | SJC_S000188 | NA     | NA     | NA | Sjp_0029560.1 | cellular process              | 0.63852  |
| unknown     | NA    | NA       | NA       | SJC_S000188 | NA     | NA     | NA | Sjp_0029570.1 | catalytic activity            | 0.035844 |
| HSB10kb_375 | 5     | 2524243  | 2565751  | SJC_S000188 | 298826 | 348625 | -  | Sjp_0029580.1 | binding                       | 0.052762 |
| HSB10kb_375 | 5     | 2524243  | 2565751  | SJC_S000188 | 298826 | 348625 | -  | Sjp_0029590.1 | NA                            | NA       |
| unknown     | NA    | NA       | NA       | SJC_S000188 | NA     | NA     | NA | Sjp_0029600.1 | catalytic activity            | 0.035844 |
| unknown     | NA    | NA       | NA       | SJC_S000189 | NA     | NA     | NA | Sjp_0029610.1 | biological regulation         | 0.76396  |
| unknown     | NA    | NA       | NA       | SJC_S000189 | NA     | NA     | NA | Sjp_0029630.1 | NA                            | NA       |
| unknown     | NA    | NA       | NA       | SJC_S000189 | NA     | NA     | NA | Sjp_0029640.1 | cell part                     | 0.009037 |
| unknown     | NA    | NA       | NA       | SJC_S000189 | NA     | NA     | NA | Sjp_0029650.1 | biological regulation         | 0.76396  |
| unknown     | NA    | NA       | NA       | SJC_S000189 | NA     | NA     | NA | Sjp_0029660.1 | NA                            | NA       |
| unknown     | NA    | NA       | NA       | SJC_S000189 | NA     | NA     | NA | Sjp_0029670.1 | NA                            | NA       |
| unknown     | NA    | NA       | NA       | SJC_S000189 | NA     | NA     | NA | Sjp_0029680.1 | binding                       | 0.052762 |
| unknown     | NA    | NA       | NA       | SJC_S000189 | NA     | NA     | NA | Sjp_0029690.1 | NA                            | NA       |
| HSB10kb_376 | WZ    | 58148885 | 58214666 | SJC_S000190 | 6193   | 22442  | +  | Sjp_0029700.1 | NA                            | NA       |
| HSB10kb_376 | WZ    | 58148885 | 58214666 | SJC_S000190 | 6193   | 22442  | +  | Sjp_0029710.1 | NA                            | NA       |
| HSB10kb_376 | WZ    | 58148885 | 58214666 | SJC_S000190 | 6193   | 22442  | +  | Sjp_0029720.1 | catalytic activity            | 0.035844 |
| HSB10kb_377 | 3     | 12899036 | 13115103 | SJC_S000191 | 12641  | 221911 | +  | Sjp_0029740.1 | cell part                     | 0.009037 |
| HSB10kb_377 | 3     | 12899036 | 13115103 | SJC_S000191 | 12641  | 221911 | +  | Sjp_0029750.1 | catalytic activity            | 0.035844 |
| HSB10kb_377 | 3     | 12899036 | 13115103 | SJC_S000191 | 12641  | 221911 | +  | Sjp_0029770.1 | NA                            | NA       |
| HSB10kb_377 | 3     | 12899036 | 13115103 | SJC_S000191 | 12641  | 221911 | +  | Sjp_0029780.1 | NA                            | NA       |
| HSB10kb_377 | 3     | 12899036 | 13115103 | SJC_S000191 | 12641  | 221911 | +  | Sjp_0029790.1 | molecular transducer activity | 0.50162  |
| EBR10kb_232 | "3,3" | NA       | NA       | SJC_S000191 | 221912 | 293798 | NA | Sjp_0029790.1 | molecular transducer activity | 0.50162  |
| EBR10kb_232 | "3,3" | NA       | NA       | SJC_S000191 | 221912 | 293798 | NA | Sjp_0029800.1 | NA                            | NA       |
| EBR10kb_232 | "3,3" | NA       | NA       | SJC_S000191 | 221912 | 293798 | NA | Sjp_0029810.1 | establishment of localization | NA       |
| HSB10kb_378 | 3     | 13145332 | 13691152 | SJC_S000191 | 293799 | 792049 | -  | Sjp_0029810.1 | establishment of localization | NA       |

|             |    |          |          |             |        |        |    |               |                               |          |
|-------------|----|----------|----------|-------------|--------|--------|----|---------------|-------------------------------|----------|
| HSB10kb_378 | 3  | 13145332 | 13691152 | SJC_S000191 | 293799 | 792049 | -  | Sjp_0029820.1 | NA                            | NA       |
| HSB10kb_378 | 3  | 13145332 | 13691152 | SJC_S000191 | 293799 | 792049 | -  | Sjp_0029840.1 | NA                            | NA       |
| HSB10kb_378 | 3  | 13145332 | 13691152 | SJC_S000191 | 293799 | 792049 | -  | Sjp_0029850.1 | NA                            | NA       |
| HSB10kb_378 | 3  | 13145332 | 13691152 | SJC_S000191 | 293799 | 792049 | -  | Sjp_0029860.1 | NA                            | NA       |
| HSB10kb_378 | 3  | 13145332 | 13691152 | SJC_S000191 | 293799 | 792049 | -  | Sjp_0029870.1 | NA                            | NA       |
| HSB10kb_378 | 3  | 13145332 | 13691152 | SJC_S000191 | 293799 | 792049 | -  | Sjp_0029880.1 | catalytic activity            | 0.035844 |
| HSB10kb_378 | 3  | 13145332 | 13691152 | SJC_S000191 | 293799 | 792049 | -  | Sjp_0029890.1 | catalytic activity            | 0.035844 |
| HSB10kb_378 | 3  | 13145332 | 13691152 | SJC_S000191 | 293799 | 792049 | -  | Sjp_0029900.1 | NA                            | NA       |
| HSB10kb_378 | 3  | 13145332 | 13691152 | SJC_S000191 | 293799 | 792049 | -  | Sjp_0029910.1 | NA                            | NA       |
| HSB10kb_378 | 3  | 13145332 | 13691152 | SJC_S000191 | 293799 | 792049 | -  | Sjp_0029920.1 | NA                            | NA       |
| HSB10kb_378 | 3  | 13145332 | 13691152 | SJC_S000191 | 293799 | 792049 | -  | Sjp_0029930.1 | NA                            | NA       |
| HSB10kb_378 | 3  | 13145332 | 13691152 | SJC_S000191 | 293799 | 792049 | -  | Sjp_0029940.1 | binding                       | 0.052762 |
| HSB10kb_378 | 3  | 13145332 | 13691152 | SJC_S000191 | 293799 | 792049 | -  | Sjp_0029950.1 | cell part                     | 0.009037 |
| unknown     | NA | NA       | NA       | SJC_S000191 | NA     | NA     | NA | Sjp_0029970.1 | NA                            | NA       |
| unknown     | NA | NA       | NA       | SJC_S000192 | NA     | NA     | NA | Sjp_0029980.1 | establishment of localization | NA       |
| unknown     | NA | NA       | NA       | SJC_S000192 | NA     | NA     | NA | Sjp_0029990.1 | establishment of localization | NA       |
| unknown     | NA | NA       | NA       | SJC_S000192 | NA     | NA     | NA | Sjp_0030000.1 | NA                            | NA       |
| unknown     | NA | NA       | NA       | SJC_S000192 | NA     | NA     | NA | Sjp_0030010.1 | NA                            | NA       |
| unknown     | NA | NA       | NA       | SJC_S000192 | NA     | NA     | NA | Sjp_0030020.1 | NA                            | NA       |
| unknown     | NA | NA       | NA       | SJC_S000192 | NA     | NA     | NA | Sjp_0030030.1 | binding                       | 0.052762 |
| unknown     | NA | NA       | NA       | SJC_S000192 | NA     | NA     | NA | Sjp_0030040.1 | biological regulation         | 0.76396  |
| unknown     | NA | NA       | NA       | SJC_S000192 | NA     | NA     | NA | Sjp_0030050.1 | NA                            | NA       |
| unknown     | NA | NA       | NA       | SJC_S000192 | NA     | NA     | NA | Sjp_0030060.1 | biological regulation         | 0.76396  |
| unknown     | NA | NA       | NA       | SJC_S000192 | NA     | NA     | NA | Sjp_0030070.1 | NA                            | NA       |
| unknown     | NA | NA       | NA       | SJC_S000192 | NA     | NA     | NA | Sjp_0030080.1 | NA                            | NA       |
| unknown     | NA | NA       | NA       | SJC_S000192 | NA     | NA     | NA | Sjp_0030090.1 | NA                            | NA       |
| unknown     | NA | NA       | NA       | SJC_S000192 | NA     | NA     | NA | Sjp_0030100.1 | binding                       | 0.052762 |
| unknown     | NA | NA       | NA       | SJC_S000192 | NA     | NA     | NA | Sjp_0030110.1 | NA                            | NA       |
| unknown     | NA | NA       | NA       | SJC_S000192 | NA     | NA     | NA | Sjp_0030120.1 | NA                            | NA       |
| unknown     | NA | NA       | NA       | SJC_S000192 | NA     | NA     | NA | Sjp_0030130.1 | biological                    | 0.76396  |

|             |       |          |          |             |        |        |    |               |                       |          |
|-------------|-------|----------|----------|-------------|--------|--------|----|---------------|-----------------------|----------|
|             |       |          |          |             |        |        |    |               | regulation            |          |
| unknown     | NA    | NA       | NA       | SJC_S000192 | NA     | NA     | NA | Sjp_0030140.1 | NA                    | NA       |
| unknown     | NA    | NA       | NA       | SJC_S000192 | NA     | NA     | NA | Sjp_0030150.1 | NA                    | NA       |
| unknown     | NA    | NA       | NA       | SJC_S000192 | NA     | NA     | NA | Sjp_0030160.1 | cellular process      | 0.63852  |
| unknown     | NA    | NA       | NA       | SJC_S000192 | NA     | NA     | NA | Sjp_0030170.1 | catalytic activity    | 0.035844 |
| unknown     | NA    | NA       | NA       | SJC_S000192 | NA     | NA     | NA | Sjp_0030180.1 | catalytic activity    | 0.035844 |
| unknown     | NA    | NA       | NA       | SJC_S000192 | NA     | NA     | NA | Sjp_0030190.1 | NA                    | NA       |
| unknown     | NA    | NA       | NA       | SJC_S000192 | NA     | NA     | NA | Sjp_0030210.1 | biological regulation | 0.76396  |
| unknown     | NA    | NA       | NA       | SJC_S000193 | NA     | NA     | NA | Sjp_0030220.1 | NA                    | NA       |
| unknown     | NA    | NA       | NA       | SJC_S000193 | NA     | NA     | NA | Sjp_0030230.1 | NA                    | NA       |
| HSB10kb_379 | 2     | 23259709 | 23296317 | SJC_S000193 | 78241  | 146132 | -  | Sjp_0030240.1 | cell part             | 0.009037 |
| HSB10kb_379 | 2     | 23259709 | 23296317 | SJC_S000193 | 78241  | 146132 | -  | Sjp_0030250.1 | NA                    | NA       |
| HSB10kb_379 | 2     | 23259709 | 23296317 | SJC_S000193 | 78241  | 146132 | -  | Sjp_0030260.1 | NA                    | NA       |
| HSB10kb_379 | 2     | 23259709 | 23296317 | SJC_S000193 | 78241  | 146132 | -  | Sjp_0030270.1 | NA                    | NA       |
| EBR10kb_233 | "2,2" | NA       | NA       | SJC_S000193 | 146133 | 150783 | NA | Sjp_0030270.1 | NA                    | NA       |
| HSB10kb_380 | 2     | 15849898 | 15980322 | SJC_S000193 | 150784 | 283293 | +  | Sjp_0030280.1 | cellular process      | 0.63852  |
| HSB10kb_380 | 2     | 15849898 | 15980322 | SJC_S000193 | 150784 | 283293 | +  | Sjp_0030290.1 | NA                    | NA       |
| HSB10kb_380 | 2     | 15849898 | 15980322 | SJC_S000193 | 150784 | 283293 | +  | Sjp_0030300.1 | NA                    | NA       |
| HSB10kb_380 | 2     | 15849898 | 15980322 | SJC_S000193 | 150784 | 283293 | +  | Sjp_0030310.1 | NA                    | NA       |
| HSB10kb_380 | 2     | 15849898 | 15980322 | SJC_S000193 | 150784 | 283293 | +  | Sjp_0030320.1 | NA                    | NA       |
| EBR10kb_234 | "2,2" | NA       | NA       | SJC_S000193 | 283294 | 292954 | NA | Sjp_0030320.1 | NA                    | NA       |
| EBR10kb_234 | "2,2" | NA       | NA       | SJC_S000193 | 283294 | 292954 | NA | Sjp_0030330.1 | NA                    | NA       |
| HSB10kb_381 | 2     | 16063693 | 16083276 | SJC_S000193 | 292955 | 307890 | +  | Sjp_0030340.1 | binding               | 0.052762 |
| EBR10kb_235 | "2,2" | NA       | NA       | SJC_S000193 | 307891 | 329738 | NA | Sjp_0030340.1 | binding               | 0.052762 |
| EBR10kb_235 | "2,2" | NA       | NA       | SJC_S000193 | 307891 | 329738 | NA | Sjp_0030350.1 | NA                    | NA       |
| HSB10kb_382 | 2     | 15988142 | 16052099 | SJC_S000193 | 329739 | 376733 | +  | Sjp_0030360.1 | metabolic process     | 0.41934  |
| HSB10kb_382 | 2     | 15988142 | 16052099 | SJC_S000193 | 329739 | 376733 | +  | Sjp_0030370.1 | NA                    | NA       |
| EBR10kb_236 | "2,2" | NA       | NA       | SJC_S000193 | 376734 | 425952 | NA | Sjp_0030380.1 | binding               | 0.052762 |
| HSB10kb_383 | 2     | 16097620 | 16178882 | SJC_S000193 | 425953 | 499356 | +  | Sjp_0030390.1 | NA                    | NA       |
| HSB10kb_383 | 2     | 16097620 | 16178882 | SJC_S000193 | 425953 | 499356 | +  | Sjp_0030400.1 | NA                    | NA       |
| HSB10kb_383 | 2     | 16097620 | 16178882 | SJC_S000193 | 425953 | 499356 | +  | Sjp_0030410.1 | biological regulation | 0.76396  |



|             |       |          |          |             |        |        |    |               |                                  |          |
|-------------|-------|----------|----------|-------------|--------|--------|----|---------------|----------------------------------|----------|
| HSB10kb_383 | 2     | 16097620 | 16178882 | SJC_S000193 | 425953 | 499356 | +  | Sjp_0030420.1 | transcription regulator activity | NA       |
| unknown     | NA    | NA       | NA       | SJC_S000193 | NA     | NA     | NA | Sjp_0030440.1 | binding                          | 0.052762 |
| HSB10kb_384 | 1     | 23287137 | 23402192 | SJC_S000194 | 25102  | 112517 | -  | Sjp_0030450.1 | NA                               | NA       |
| HSB10kb_384 | 1     | 23287137 | 23402192 | SJC_S000194 | 25102  | 112517 | -  | Sjp_0030460.1 | NA                               | NA       |
| HSB10kb_384 | 1     | 23287137 | 23402192 | SJC_S000194 | 25102  | 112517 | -  | Sjp_0030470.1 | NA                               | NA       |
| EBR10kb_237 | "1,1" | NA       | NA       | SJC_S000194 | 112518 | 227455 | NA | Sjp_0030470.1 | NA                               | NA       |
| EBR10kb_237 | "1,1" | NA       | NA       | SJC_S000194 | 112518 | 227455 | NA | Sjp_0030480.1 | cell part                        | 0.009037 |
| EBR10kb_237 | "1,1" | NA       | NA       | SJC_S000194 | 112518 | 227455 | NA | Sjp_0030490.1 | establishment of localization    | NA       |
| EBR10kb_237 | "1,1" | NA       | NA       | SJC_S000194 | 112518 | 227455 | NA | Sjp_0030500.1 | NA                               | NA       |
| EBR10kb_237 | "1,1" | NA       | NA       | SJC_S000194 | 112518 | 227455 | NA | Sjp_0030510.1 | NA                               | NA       |
| EBR10kb_237 | "1,1" | NA       | NA       | SJC_S000194 | 112518 | 227455 | NA | Sjp_0030520.1 | catalytic activity               | 0.035844 |
| EBR10kb_237 | "1,1" | NA       | NA       | SJC_S000194 | 112518 | 227455 | NA | Sjp_0030530.1 | NA                               | NA       |
| EBR10kb_237 | "1,1" | NA       | NA       | SJC_S000194 | 112518 | 227455 | NA | Sjp_0030540.1 | NA                               | NA       |
| HSB10kb_385 | 1     | 39497395 | 39507783 | SJC_S000194 | 227456 | 241103 |    | Sjp_0030540.1 | NA                               | NA       |
| EBR10kb_238 | "1,1" | NA       | NA       | SJC_S000194 | 241104 | 263061 | NA | Sjp_0030550.1 | NA                               | NA       |
| EBR10kb_238 | "1,1" | NA       | NA       | SJC_S000194 | 241104 | 263061 | NA | Sjp_0030560.1 | binding                          | 0.052762 |
| HSB10kb_386 | 1     | 39534895 | 39595534 | SJC_S000194 | 263062 | 322499 | -  | Sjp_0030560.1 | binding                          | 0.052762 |
| HSB10kb_386 | 1     | 39534895 | 39595534 | SJC_S000194 | 263062 | 322499 | -  | Sjp_0030570.1 | NA                               | NA       |
| EBR10kb_239 | "1,1" | NA       | NA       | SJC_S000194 | 322500 | 362811 | NA | Sjp_0030570.1 | NA                               | NA       |
| EBR10kb_239 | "1,1" | NA       | NA       | SJC_S000194 | 322500 | 362811 | NA | Sjp_0030580.1 | NA                               | NA       |
| EBR10kb_239 | "1,1" | NA       | NA       | SJC_S000194 | 322500 | 362811 | NA | Sjp_0030590.1 | biological regulation            | 0.76396  |
| HSB10kb_387 | 1     | 39615737 | 39636985 | SJC_S000194 | 362812 | 394908 | -  | Sjp_0030600.1 | binding                          | 0.052762 |
| HSB10kb_387 | 1     | 39615737 | 39636985 | SJC_S000194 | 362812 | 394908 | -  | Sjp_0030610.1 | NA                               | NA       |
| HSB10kb_388 | 1     | 25950521 | 26384886 | SJC_S000195 | 2177   | 383092 | +  | Sjp_0030620.1 | biological regulation            | 0.76396  |
| HSB10kb_388 | 1     | 25950521 | 26384886 | SJC_S000195 | 2177   | 383092 | +  | Sjp_0030630.1 | NA                               | NA       |
| HSB10kb_388 | 1     | 25950521 | 26384886 | SJC_S000195 | 2177   | 383092 | +  | Sjp_0030640.1 | metabolic process                | 0.41934  |
| HSB10kb_388 | 1     | 25950521 | 26384886 | SJC_S000195 | 2177   | 383092 | +  | Sjp_0030650.1 | NA                               | NA       |
| HSB10kb_388 | 1     | 25950521 | 26384886 | SJC_S000195 | 2177   | 383092 | +  | Sjp_0030660.1 | cell part                        | 0.009037 |

|             |       |          |          |             |        |        |    |               |                    |          |
|-------------|-------|----------|----------|-------------|--------|--------|----|---------------|--------------------|----------|
| HSB10kb_388 | 1     | 25950521 | 26384886 | SJC_S000195 | 2177   | 383092 | +  | Sjp_0030670.1 | cellular process   | 0.63852  |
| HSB10kb_388 | 1     | 25950521 | 26384886 | SJC_S000195 | 2177   | 383092 | +  | Sjp_0030680.1 | NA                 | NA       |
| HSB10kb_388 | 1     | 25950521 | 26384886 | SJC_S000195 | 2177   | 383092 | +  | Sjp_0030690.1 | NA                 | NA       |
| HSB10kb_388 | 1     | 25950521 | 26384886 | SJC_S000195 | 2177   | 383092 | +  | Sjp_0030700.1 | NA                 | NA       |
| HSB10kb_388 | 1     | 25950521 | 26384886 | SJC_S000195 | 2177   | 383092 | +  | Sjp_0030710.1 | catalytic activity | 0.035844 |
| HSB10kb_388 | 1     | 25950521 | 26384886 | SJC_S000195 | 2177   | 383092 | +  | Sjp_0030720.1 | NA                 | NA       |
| unknown     | NA    | NA       | NA       | SJC_S000196 | NA     | NA     | NA | Sjp_0030730.1 | NA                 | NA       |
| unknown     | NA    | NA       | NA       | SJC_S000196 | NA     | NA     | NA | Sjp_0030740.1 | NA                 | NA       |
| unknown     | NA    | NA       | NA       | SJC_S000196 | NA     | NA     | NA | Sjp_0030750.1 | NA                 | NA       |
| unknown     | NA    | NA       | NA       | SJC_S000196 | NA     | NA     | NA | Sjp_0030760.1 | NA                 | NA       |
| unknown     | NA    | NA       | NA       | SJC_S000196 | NA     | NA     | NA | Sjp_0030770.1 | NA                 | NA       |
| unknown     | NA    | NA       | NA       | SJC_S000196 | NA     | NA     | NA | Sjp_0030780.1 | binding            | 0.052762 |
| unknown     | NA    | NA       | NA       | SJC_S000196 | NA     | NA     | NA | Sjp_0030790.1 | NA                 | NA       |
| HSB10kb_389 | 6     | 7952306  | 7988844  | SJC_S000197 | 7056   | 36783  | -  | Sjp_0030800.1 | catalytic activity | 0.035844 |
| EBR10kb_240 | "6,6" | NA       | NA       | SJC_S000197 | 36784  | 64491  | NA | Sjp_0030810.1 | NA                 | NA       |
| EBR10kb_240 | "6,6" | NA       | NA       | SJC_S000197 | 36784  | 64491  | NA | Sjp_0030820.1 | catalytic activity | 0.035844 |
| HSB10kb_390 | 6     | 8104316  | 8190182  | SJC_S000197 | 64492  | 81621  |    | Sjp_0030820.1 | catalytic activity | 0.035844 |
| EBR10kb_241 | "6,6" | NA       | NA       | SJC_S000197 | 81622  | 93324  | NA | Sjp_0030830.1 | NA                 | NA       |
| HSB10kb_391 | 6     | 7578675  | 7605545  | SJC_S000197 | 93325  | 119763 | +  | Sjp_0030830.1 | NA                 | NA       |
| EBR10kb_242 | "6,6" | NA       | NA       | SJC_S000197 | 119764 | 209753 | NA | Sjp_0030840.1 | NA                 | NA       |
| HSB10kb_392 | 6     | 7427976  | 7542391  | SJC_S000197 | 209754 | 357379 | -  | Sjp_0030840.1 | NA                 | NA       |
| HSB10kb_392 | 6     | 7427976  | 7542391  | SJC_S000197 | 209754 | 357379 | -  | Sjp_0030850.1 | NA                 | NA       |
| EBR10kb_243 | "6,6" | NA       | NA       | SJC_S000197 | 357380 | 388877 | NA | Sjp_0030860.1 | NA                 | NA       |
| HSB10kb_393 | 6     | 7129057  | 7305603  | SJC_S000197 | 388878 | 555338 | +  | Sjp_0030860.1 | NA                 | NA       |
| HSB10kb_393 | 6     | 7129057  | 7305603  | SJC_S000197 | 388878 | 555338 | +  | Sjp_0030870.1 | NA                 | NA       |
| HSB10kb_393 | 6     | 7129057  | 7305603  | SJC_S000197 | 388878 | 555338 | +  | Sjp_0030880.1 | NA                 | NA       |
| HSB10kb_393 | 6     | 7129057  | 7305603  | SJC_S000197 | 388878 | 555338 | +  | Sjp_0030890.1 | NA                 | NA       |
| HSB10kb_393 | 6     | 7129057  | 7305603  | SJC_S000197 | 388878 | 555338 | +  | Sjp_0030900.1 | catalytic activity | 0.035844 |
| HSB10kb_393 | 6     | 7129057  | 7305603  | SJC_S000197 | 388878 | 555338 | +  | Sjp_0030910.1 | catalytic activity | 0.035844 |
| EBR10kb_244 | "6,6" | NA       | NA       | SJC_S000197 | 555339 | 575823 | NA | Sjp_0030920.1 | NA                 | NA       |
| HSB10kb_394 | 6     | 7363585  | 7383124  | SJC_S000197 | 575824 | 586311 | -  | Sjp_0030920.1 | NA                 | NA       |
| HSB10kb_394 | 6     | 7363585  | 7383124  | SJC_S000197 | 575824 | 586311 | -  | Sjp_0030930.1 | metabolic process  | 0.41934  |
| unknown     | NA    | NA       | NA       | SJC_S000198 | NA     | NA     | NA | Sjp_0030940.1 | NA                 | NA       |

|             |       |          |          |             |        |        |    |               |                               |          |
|-------------|-------|----------|----------|-------------|--------|--------|----|---------------|-------------------------------|----------|
| unknown     | NA    | NA       | NA       | SJC_S000198 | NA     | NA     | NA | Sjp_0030950.1 | NA                            | NA       |
| HSB10kb_395 | 3     | 23886189 | 23988505 | SJC_S000198 | 61131  | 152115 | -  | Sjp_0030960.1 | NA                            | NA       |
| HSB10kb_395 | 3     | 23886189 | 23988505 | SJC_S000198 | 61131  | 152115 | -  | Sjp_0030970.1 | NA                            | NA       |
| HSB10kb_395 | 3     | 23886189 | 23988505 | SJC_S000198 | 61131  | 152115 | -  | Sjp_0030980.1 | NA                            | NA       |
| HSB10kb_395 | 3     | 23886189 | 23988505 | SJC_S000198 | 61131  | 152115 | -  | Sjp_0030990.1 | NA                            | NA       |
| HSB10kb_395 | 3     | 23886189 | 23988505 | SJC_S000198 | 61131  | 152115 | -  | Sjp_0031000.1 | biological regulation         | 0.76396  |
| HSB10kb_395 | 3     | 23886189 | 23988505 | SJC_S000198 | 61131  | 152115 | -  | Sjp_0031010.1 | catalytic activity            | 0.035844 |
| EBR10kb_245 | "3,3" | NA       | NA       | SJC_S000198 | 152116 | 183902 | NA | Sjp_0031010.1 | catalytic activity            | 0.035844 |
| EBR10kb_245 | "3,3" | NA       | NA       | SJC_S000198 | 152116 | 183902 | NA | Sjp_0031020.1 | catalytic activity            | 0.035844 |
| EBR10kb_245 | "3,3" | NA       | NA       | SJC_S000198 | 152116 | 183902 | NA | Sjp_0031030.1 | NA                            | NA       |
| HSB10kb_396 | 3     | 23748015 | 23782887 | SJC_S000198 | 183903 | 241788 | +  | Sjp_0031040.1 | NA                            | NA       |
| unknown     | NA    | NA       | NA       | SJC_S000199 | NA     | NA     | NA | Sjp_0031050.1 | NA                            | NA       |
| unknown     | NA    | NA       | NA       | SJC_S000199 | NA     | NA     | NA | Sjp_0031060.1 | NA                            | NA       |
| unknown     | NA    | NA       | NA       | SJC_S000199 | NA     | NA     | NA | Sjp_0031070.1 | NA                            | NA       |
| HSB10kb_397 | 6     | 6650495  | 6663770  | SJC_S000199 | 181177 | 197656 |    | Sjp_0031080.1 | catalytic activity            | 0.035844 |
| EBR10kb_246 | "6,6" | NA       | NA       | SJC_S000199 | 197657 | 222978 | NA | Sjp_0031080.1 | catalytic activity            | 0.035844 |
| HSB10kb_398 | 6     | 6825559  | 6866243  | SJC_S000199 | 222979 | 254140 | -  | Sjp_0031090.1 | establishment of localization | NA       |
| HSB10kb_398 | 6     | 6825559  | 6866243  | SJC_S000199 | 222979 | 254140 | -  | Sjp_0031100.1 | NA                            | NA       |
| EBR10kb_247 | "6,6" | NA       | NA       | SJC_S000199 | 254141 | 273893 | NA | Sjp_0031100.1 | NA                            | NA       |
| EBR10kb_247 | "6,6" | NA       | NA       | SJC_S000199 | 254141 | 273893 | NA | Sjp_0031110.1 | binding                       | 0.052762 |
| HSB10kb_399 | 6     | 6727987  | 6803048  | SJC_S000199 | 273894 | 359969 | +  | Sjp_0031110.1 | binding                       | 0.052762 |
| HSB10kb_399 | 6     | 6727987  | 6803048  | SJC_S000199 | 273894 | 359969 | +  | Sjp_0031120.1 | NA                            | NA       |
| EBR10kb_248 | "6,6" | NA       | NA       | SJC_S000199 | 359970 | 418229 | NA | Sjp_0031120.1 | NA                            | NA       |
| EBR10kb_248 | "6,6" | NA       | NA       | SJC_S000199 | 359970 | 418229 | NA | Sjp_0031130.1 | enzyme regulator activity     | 0.1755   |
| EBR10kb_248 | "6,6" | NA       | NA       | SJC_S000199 | 359970 | 418229 | NA | Sjp_0031140.1 | NA                            | NA       |
| EBR10kb_248 | "6,6" | NA       | NA       | SJC_S000199 | 359970 | 418229 | NA | Sjp_0031150.1 | NA                            | NA       |
| HSB10kb_400 | 6     | 6867162  | 6900460  | SJC_S000199 | 418230 | 459815 | +  | Sjp_0031160.1 | cell part                     | 0.009037 |
| HSB10kb_400 | 6     | 6867162  | 6900460  | SJC_S000199 | 418230 | 459815 | +  | Sjp_0031170.1 | NA                            | NA       |
| unknown     | NA    | NA       | NA       | SJC_S000199 | NA     | NA     | NA | Sjp_0031180.1 | NA                            | NA       |
| unknown     | NA    | NA       | NA       | SJC_S000199 | NA     | NA     | NA | Sjp_0031190.1 | cellular process              | 0.63852  |

|             |       |          |          |             |        |        |    |               |                       |          |
|-------------|-------|----------|----------|-------------|--------|--------|----|---------------|-----------------------|----------|
| unknown     | NA    | NA       | NA       | SJC_S000199 | NA     | NA     | NA | Sjp_0031200.1 | NA                    | NA       |
| unknown     | NA    | NA       | NA       | SJC_S000200 | NA     | NA     | NA | Sjp_0031210.1 | NA                    | NA       |
| HSB10kb_401 | 1     | 65034829 | 65218176 | SJC_S000200 | 62196  | 258409 | -  | Sjp_0031220.1 | NA                    | NA       |
| HSB10kb_401 | 1     | 65034829 | 65218176 | SJC_S000200 | 62196  | 258409 | -  | Sjp_0031230.1 | NA                    | NA       |
| HSB10kb_401 | 1     | 65034829 | 65218176 | SJC_S000200 | 62196  | 258409 | -  | Sjp_0031240.1 | cell part             | 0.009037 |
| HSB10kb_401 | 1     | 65034829 | 65218176 | SJC_S000200 | 62196  | 258409 | -  | Sjp_0031250.1 | NA                    | NA       |
| HSB10kb_401 | 1     | 65034829 | 65218176 | SJC_S000200 | 62196  | 258409 | -  | Sjp_0031260.1 | NA                    | NA       |
| HSB10kb_401 | 1     | 65034829 | 65218176 | SJC_S000200 | 62196  | 258409 | -  | Sjp_0031270.1 | NA                    | NA       |
| HSB10kb_401 | 1     | 65034829 | 65218176 | SJC_S000200 | 62196  | 258409 | -  | Sjp_0031280.1 | NA                    | NA       |
| HSB10kb_401 | 1     | 65034829 | 65218176 | SJC_S000200 | 62196  | 258409 | -  | Sjp_0031290.1 | NA                    | NA       |
| EBR10kb_249 | "1,1" | NA       | NA       | SJC_S000200 | 258410 | 318506 | NA | Sjp_0031300.1 | NA                    | NA       |
| EBR10kb_249 | "1,1" | NA       | NA       | SJC_S000200 | 258410 | 318506 | NA | Sjp_0031310.1 | NA                    | NA       |
| HSB10kb_402 | 1     | 64419823 | 64962350 | SJC_S000200 | 318507 | 792436 | -  | Sjp_0031310.1 | NA                    | NA       |
| HSB10kb_402 | 1     | 64419823 | 64962350 | SJC_S000200 | 318507 | 792436 | -  | Sjp_0031320.1 | transporter activity  | 0.782    |
| HSB10kb_402 | 1     | 64419823 | 64962350 | SJC_S000200 | 318507 | 792436 | -  | Sjp_0031340.1 | NA                    | NA       |
| HSB10kb_402 | 1     | 64419823 | 64962350 | SJC_S000200 | 318507 | 792436 | -  | Sjp_0031350.1 | NA                    | NA       |
| HSB10kb_402 | 1     | 64419823 | 64962350 | SJC_S000200 | 318507 | 792436 | -  | Sjp_0031360.1 | binding               | 0.052762 |
| HSB10kb_402 | 1     | 64419823 | 64962350 | SJC_S000200 | 318507 | 792436 | -  | Sjp_0031380.1 | NA                    | NA       |
| HSB10kb_402 | 1     | 64419823 | 64962350 | SJC_S000200 | 318507 | 792436 | -  | Sjp_0031390.1 | catalytic activity    | 0.035844 |
| HSB10kb_402 | 1     | 64419823 | 64962350 | SJC_S000200 | 318507 | 792436 | -  | Sjp_0031400.1 | biological regulation | 0.76396  |
| HSB10kb_402 | 1     | 64419823 | 64962350 | SJC_S000200 | 318507 | 792436 | -  | Sjp_0031410.1 | biological regulation | 0.76396  |
| HSB10kb_402 | 1     | 64419823 | 64962350 | SJC_S000200 | 318507 | 792436 | -  | Sjp_0031420.1 | NA                    | NA       |
| EBR10kb_250 | "1,1" | NA       | NA       | SJC_S000200 | 792437 | 794875 | NA | Sjp_0031420.1 | NA                    | NA       |
| HSB10kb_403 | 1     | 64330294 | 64383448 | SJC_S000200 | 794876 | 846862 | +  | Sjp_0031420.1 | NA                    | NA       |
| HSB10kb_403 | 1     | 64330294 | 64383448 | SJC_S000200 | 794876 | 846862 | +  | Sjp_0031430.1 | binding               | 0.052762 |
| unknown     | NA    | NA       | NA       | SJC_S000201 | NA     | NA     | NA | Sjp_0031450.1 | NA                    | NA       |
| unknown     | NA    | NA       | NA       | SJC_S000201 | NA     | NA     | NA | Sjp_0031460.1 | NA                    | NA       |
| unknown     | NA    | NA       | NA       | SJC_S000201 | NA     | NA     | NA | Sjp_0031470.1 | NA                    | NA       |
| unknown     | NA    | NA       | NA       | SJC_S000201 | NA     | NA     | NA | Sjp_0031480.1 | cell part             | 0.009037 |
| unknown     | NA    | NA       | NA       | SJC_S000201 | NA     | NA     | NA | Sjp_0031490.1 | NA                    | NA       |
| unknown     | NA    | NA       | NA       | SJC_S000201 | NA     | NA     | NA | Sjp_0031500.1 | molecular             | 0.50162  |

|             |         |          |          |             |       |        |    |               |                                               |          |
|-------------|---------|----------|----------|-------------|-------|--------|----|---------------|-----------------------------------------------|----------|
|             |         |          |          |             |       |        |    |               | transducer activity                           |          |
| unknown     | NA      | NA       | NA       | SJC_S000201 | NA    | NA     | NA | Sjp_0031510.1 | cell part                                     | 0.009037 |
| unknown     | NA      | NA       | NA       | SJC_S000202 | NA    | NA     | NA | Sjp_0031520.1 | NA                                            | NA       |
| HSB10kb_404 | WZ      | 41474924 | 41493037 | SJC_S000202 | 15856 | 36206  | +  | Sjp_0031530.1 | NA                                            | NA       |
| EBR10kb_251 | "WZ,WZ" | NA       | NA       | SJC_S000202 | 36207 | 69697  | NA | Sjp_0031530.1 | NA                                            | NA       |
| EBR10kb_251 | "WZ,WZ" | NA       | NA       | SJC_S000202 | 36207 | 69697  | NA | Sjp_0031540.1 | NA                                            | NA       |
| HSB10kb_405 | WZ      | 41294667 | 41425292 | SJC_S000202 | 69698 | 170004 | -  | Sjp_0031540.1 | NA                                            | NA       |
| HSB10kb_405 | WZ      | 41294667 | 41425292 | SJC_S000202 | 69698 | 170004 | -  | Sjp_0031550.1 | biological regulation                         | 0.76396  |
| HSB10kb_405 | WZ      | 41294667 | 41425292 | SJC_S000202 | 69698 | 170004 | -  | Sjp_0031560.1 | binding                                       | 0.052762 |
| HSB10kb_405 | WZ      | 41294667 | 41425292 | SJC_S000202 | 69698 | 170004 | -  | Sjp_0031570.1 | cellular process                              | 0.63852  |
| HSB10kb_405 | WZ      | 41294667 | 41425292 | SJC_S000202 | 69698 | 170004 | -  | Sjp_0031580.1 | biological regulation                         | 0.76396  |
| HSB10kb_405 | WZ      | 41294667 | 41425292 | SJC_S000202 | 69698 | 170004 | -  | Sjp_0031590.1 | catalytic activity                            | 0.035844 |
| HSB10kb_406 | 4       | 22560234 | 22738276 | SJC_S000203 | 1689  | 190435 | -  | Sjp_0031600.1 | NA                                            | NA       |
| HSB10kb_406 | 4       | 22560234 | 22738276 | SJC_S000203 | 1689  | 190435 | -  | Sjp_0031610.1 | NA                                            | NA       |
| HSB10kb_406 | 4       | 22560234 | 22738276 | SJC_S000203 | 1689  | 190435 | -  | Sjp_0031620.1 | NA                                            | NA       |
| HSB10kb_406 | 4       | 22560234 | 22738276 | SJC_S000203 | 1689  | 190435 | -  | Sjp_0031630.1 | catalytic activity                            | 0.035844 |
| HSB10kb_406 | 4       | 22560234 | 22738276 | SJC_S000203 | 1689  | 190435 | -  | Sjp_0031640.1 | NA                                            | NA       |
| HSB10kb_406 | 4       | 22560234 | 22738276 | SJC_S000203 | 1689  | 190435 | -  | Sjp_0031650.1 | catalytic activity                            | 0.035844 |
| unknown     | NA      | NA       | NA       | SJC_S000204 | NA    | NA     | NA | Sjp_0031660.1 | NA                                            | NA       |
| HSB10kb_407 | 2       | 20370921 | 20588018 | SJC_S000204 | 33577 | 178230 | -  | Sjp_0031670.1 | protein binding transcription factor activity | NA       |
| HSB10kb_407 | 2       | 20370921 | 20588018 | SJC_S000204 | 33577 | 178230 | -  | Sjp_0031680.1 | catalytic activity                            | 0.035844 |
| HSB10kb_407 | 2       | 20370921 | 20588018 | SJC_S000204 | 33577 | 178230 | -  | Sjp_0031690.1 | NA                                            | NA       |
| HSB10kb_407 | 2       | 20370921 | 20588018 | SJC_S000204 | 33577 | 178230 | -  | Sjp_0031700.1 | cellular process                              | 0.63852  |
| unknown     | NA      | NA       | NA       | SJC_S000204 | NA    | NA     | NA | Sjp_0031710.1 | cell part                                     | 0.009037 |
| unknown     | NA      | NA       | NA       | SJC_S000205 | NA    | NA     | NA | Sjp_0031720.1 | NA                                            | NA       |
| unknown     | NA      | NA       | NA       | SJC_S000205 | NA    | NA     | NA | Sjp_0031730.1 | NA                                            | NA       |
| unknown     | NA      | NA       | NA       | SJC_S000205 | NA    | NA     | NA | Sjp_0031740.1 | NA                                            | NA       |
| unknown     | NA      | NA       | NA       | SJC_S000205 | NA    | NA     | NA | Sjp_0031750.1 | NA                                            | NA       |
| unknown     | NA      | NA       | NA       | SJC_S000205 | NA    | NA     | NA | Sjp_0031760.1 | NA                                            | NA       |

|             |       |          |          |             |        |        |    |               |                               |          |
|-------------|-------|----------|----------|-------------|--------|--------|----|---------------|-------------------------------|----------|
| unknown     | NA    | NA       | NA       | SJC_S000205 | NA     | NA     | NA | Sjp_0031770.1 | NA                            | NA       |
| unknown     | NA    | NA       | NA       | SJC_S000205 | NA     | NA     | NA | Sjp_0031780.1 | NA                            | NA       |
| unknown     | NA    | NA       | NA       | SJC_S000205 | NA     | NA     | NA | Sjp_0031790.1 | NA                            | NA       |
| unknown     | NA    | NA       | NA       | SJC_S000205 | NA     | NA     | NA | Sjp_0031800.1 | NA                            | NA       |
| unknown     | NA    | NA       | NA       | SJC_S000206 | NA     | NA     | NA | Sjp_0031810.1 | catalytic activity            | 0.035844 |
| HSB10kb_408 | 4     | 28478623 | 28576569 | SJC_S000206 | 88890  | 190867 | -  | Sjp_0031820.1 | NA                            | NA       |
| HSB10kb_408 | 4     | 28478623 | 28576569 | SJC_S000206 | 88890  | 190867 | -  | Sjp_0031830.1 | NA                            | NA       |
| HSB10kb_408 | 4     | 28478623 | 28576569 | SJC_S000206 | 88890  | 190867 | -  | Sjp_0031840.1 | NA                            | NA       |
| HSB10kb_408 | 4     | 28478623 | 28576569 | SJC_S000206 | 88890  | 190867 | -  | Sjp_0031850.1 | catalytic activity            | 0.035844 |
| EBR10kb_252 | "4,4" | NA       | NA       | SJC_S000206 | 190868 | 211195 | NA | Sjp_0031850.1 | catalytic activity            | 0.035844 |
| EBR10kb_252 | "4,4" | NA       | NA       | SJC_S000206 | 190868 | 211195 | NA | Sjp_0031860.1 | NA                            | NA       |
| HSB10kb_409 | 4     | 24937905 | 24952775 | SJC_S000206 | 211196 | 223748 | +  | Sjp_0031860.1 | NA                            | NA       |
| EBR10kb_253 | "4,4" | NA       | NA       | SJC_S000206 | 223749 | 274459 | NA | Sjp_0031870.1 | NA                            | NA       |
| EBR10kb_253 | "4,4" | NA       | NA       | SJC_S000206 | 223749 | 274459 | NA | Sjp_0031880.1 | NA                            | NA       |
| HSB10kb_410 | 4     | 25006176 | 25058901 | SJC_S000206 | 274460 | 311645 | +  | Sjp_0031880.1 | NA                            | NA       |
| unknown     | NA    | NA       | NA       | SJC_S000207 | NA     | NA     | NA | Sjp_0031900.1 | NA                            | NA       |
| unknown     | NA    | NA       | NA       | SJC_S000207 | NA     | NA     | NA | Sjp_0031910.1 | molecular transducer activity | 0.50162  |
| unknown     | NA    | NA       | NA       | SJC_S000207 | NA     | NA     | NA | Sjp_0031920.1 | binding                       | 0.052762 |
| unknown     | NA    | NA       | NA       | SJC_S000207 | NA     | NA     | NA | Sjp_0031930.1 | cell part                     | 0.009037 |
| HSB10kb_411 | 1     | 63681045 | 63771266 | SJC_S000207 | 93410  | 182571 | +  | Sjp_0031940.1 | NA                            | NA       |
| HSB10kb_411 | 1     | 63681045 | 63771266 | SJC_S000207 | 93410  | 182571 | +  | Sjp_0031950.1 | enzyme regulator activity     | 0.1755   |
| HSB10kb_411 | 1     | 63681045 | 63771266 | SJC_S000207 | 93410  | 182571 | +  | Sjp_0031960.1 | catalytic activity            | 0.035844 |
| HSB10kb_411 | 1     | 63681045 | 63771266 | SJC_S000207 | 93410  | 182571 | +  | Sjp_0031970.1 | cell part                     | 0.009037 |
| EBR10kb_254 | "1,1" | NA       | NA       | SJC_S000207 | 182572 | 240280 | NA | Sjp_0031970.1 | cell part                     | 0.009037 |
| EBR10kb_254 | "1,1" | NA       | NA       | SJC_S000207 | 182572 | 240280 | NA | Sjp_0031980.1 | biological regulation         | 0.76396  |
| HSB10kb_412 | 1     | 63878673 | 63974972 | SJC_S000207 | 240281 | 329704 | +  | Sjp_0031980.1 | biological regulation         | 0.76396  |
| HSB10kb_412 | 1     | 63878673 | 63974972 | SJC_S000207 | 240281 | 329704 | +  | Sjp_0032000.1 | NA                            | NA       |
| HSB10kb_412 | 1     | 63878673 | 63974972 | SJC_S000207 | 240281 | 329704 | +  | Sjp_0032010.1 | NA                            | NA       |

|             |         |          |          |             |        |        |    |               |                                               |          |
|-------------|---------|----------|----------|-------------|--------|--------|----|---------------|-----------------------------------------------|----------|
| unknown     | NA      | NA       | NA       | SJC_S000207 | NA     | NA     | NA | Sjp_0032020.1 | NA                                            | NA       |
| HSB10kb_413 | WZ      | 56402947 | 56426208 | SJC_S000208 | 12254  | 26471  |    | Sjp_0032030.1 | cell part                                     | 0.009037 |
| EBR10kb_255 | "WZ,WZ" | NA       | NA       | SJC_S000208 | 26472  | 68315  | NA | Sjp_0032040.1 | NA                                            | NA       |
| HSB10kb_414 | WZ      | 56469718 | 56503698 | SJC_S000208 | 68316  | 97237  | -  | Sjp_0032040.1 | NA                                            | NA       |
| HSB10kb_414 | WZ      | 56469718 | 56503698 | SJC_S000208 | 68316  | 97237  | -  | Sjp_0032050.1 | cellular process                              | 0.63852  |
| EBR10kb_256 | "WZ,WZ" | NA       | NA       | SJC_S000208 | 97238  | 104737 | NA | NA            | NA                                            | NA       |
| HSB10kb_415 | WZ      | 56509579 | 56718948 | SJC_S000208 | 104738 | 374449 | +  | Sjp_0032060.1 | NA                                            | NA       |
| HSB10kb_415 | WZ      | 56509579 | 56718948 | SJC_S000208 | 104738 | 374449 | +  | Sjp_0032070.1 | NA                                            | NA       |
| HSB10kb_415 | WZ      | 56509579 | 56718948 | SJC_S000208 | 104738 | 374449 | +  | Sjp_0032080.1 | cell part                                     | 0.009037 |
| HSB10kb_415 | WZ      | 56509579 | 56718948 | SJC_S000208 | 104738 | 374449 | +  | Sjp_0032090.1 | catalytic activity                            | 0.035844 |
| HSB10kb_415 | WZ      | 56509579 | 56718948 | SJC_S000208 | 104738 | 374449 | +  | Sjp_0032100.1 | NA                                            | NA       |
| HSB10kb_415 | WZ      | 56509579 | 56718948 | SJC_S000208 | 104738 | 374449 | +  | Sjp_0032110.1 | catalytic activity                            | 0.035844 |
| HSB10kb_415 | WZ      | 56509579 | 56718948 | SJC_S000208 | 104738 | 374449 | +  | Sjp_0032120.1 | catalytic activity                            | 0.035844 |
| HSB10kb_415 | WZ      | 56509579 | 56718948 | SJC_S000208 | 104738 | 374449 | +  | Sjp_0032130.1 | NA                                            | NA       |
| EBR10kb_257 | "WZ,WZ" | NA       | NA       | SJC_S000208 | 374450 | 411678 | NA | Sjp_0032140.1 | cellular process                              | 0.63852  |
| HSB10kb_416 | WZ      | 56728830 | 56857498 | SJC_S000208 | 411679 | 494488 | +  | Sjp_0032150.1 | catalytic activity                            | 0.035844 |
| HSB10kb_416 | WZ      | 56728830 | 56857498 | SJC_S000208 | 411679 | 494488 | +  | Sjp_0032160.1 | NA                                            | NA       |
| HSB10kb_416 | WZ      | 56728830 | 56857498 | SJC_S000208 | 411679 | 494488 | +  | Sjp_0032170.1 | catalytic activity                            | 0.035844 |
| unknown     | NA      | NA       | NA       | SJC_S000208 | NA     | NA     | NA | Sjp_0032180.1 | biological regulation                         | 0.76396  |
| unknown     | NA      | NA       | NA       | SJC_S000208 | NA     | NA     | NA | Sjp_0032190.1 | NA                                            | NA       |
| HSB10kb_417 | 3       | 26348247 | 26393713 | SJC_S000209 | 26243  | 81140  | +  | Sjp_0032200.1 | NA                                            | NA       |
| EBR10kb_258 | "3,3"   | NA       | NA       | SJC_S000209 | 81141  | 232209 | NA | Sjp_0032200.1 | NA                                            | NA       |
| EBR10kb_258 | "3,3"   | NA       | NA       | SJC_S000209 | 81141  | 232209 | NA | Sjp_0032210.1 | metabolic process                             | 0.41934  |
| EBR10kb_258 | "3,3"   | NA       | NA       | SJC_S000209 | 81141  | 232209 | NA | Sjp_0032220.1 | binding                                       | 0.052762 |
| HSB10kb_418 | 3       | 25062081 | 25341951 | SJC_S000209 | 232210 | 479969 | -  | Sjp_0032230.1 | binding                                       | 0.052762 |
| HSB10kb_418 | 3       | 25062081 | 25341951 | SJC_S000209 | 232210 | 479969 | -  | Sjp_0032240.1 | NA                                            | NA       |
| HSB10kb_418 | 3       | 25062081 | 25341951 | SJC_S000209 | 232210 | 479969 | -  | Sjp_0032250.1 | NA                                            | NA       |
| HSB10kb_418 | 3       | 25062081 | 25341951 | SJC_S000209 | 232210 | 479969 | -  | Sjp_0032260.1 | NA                                            | NA       |
| HSB10kb_418 | 3       | 25062081 | 25341951 | SJC_S000209 | 232210 | 479969 | -  | Sjp_0032270.1 | cellular component organization or biogenesis | NA       |

|             |       |          |          |             |        |        |    |               |                                               |          |
|-------------|-------|----------|----------|-------------|--------|--------|----|---------------|-----------------------------------------------|----------|
| HSB10kb_419 | 1     | 41358633 | 41476692 | SJC_S000210 | 5997   | 93942  | +  | Sjp_0032280.1 | NA                                            | NA       |
| HSB10kb_419 | 1     | 41358633 | 41476692 | SJC_S000210 | 5997   | 93942  | +  | Sjp_0032290.1 | cellular process                              | 0.63852  |
| HSB10kb_419 | 1     | 41358633 | 41476692 | SJC_S000210 | 5997   | 93942  | +  | Sjp_0032300.1 | NA                                            | NA       |
| EBR10kb_259 | "1,1" | NA       | NA       | SJC_S000210 | 93943  | 106032 | NA | Sjp_0032310.1 | NA                                            | NA       |
| HSB10kb_420 | 1     | 41843662 | 41854887 | SJC_S000210 | 106033 | 152312 |    | Sjp_0032310.1 | NA                                            | NA       |
| HSB10kb_420 | 1     | 41843662 | 41854887 | SJC_S000210 | 106033 | 152312 |    | Sjp_0032320.1 | binding                                       | 0.052762 |
| unknown     | NA    | NA       | NA       | SJC_S000210 | NA     | NA     | NA | Sjp_0032330.1 | metabolic process                             | 0.41934  |
| unknown     | NA    | NA       | NA       | SJC_S000210 | NA     | NA     | NA | Sjp_0032340.1 | establishment of localization                 | NA       |
| unknown     | NA    | NA       | NA       | SJC_S000210 | NA     | NA     | NA | Sjp_0032350.1 | binding                                       | 0.052762 |
| unknown     | NA    | NA       | NA       | SJC_S000210 | NA     | NA     | NA | Sjp_0032360.1 | establishment of localization                 | NA       |
| unknown     | NA    | NA       | NA       | SJC_S000210 | NA     | NA     | NA | Sjp_0032370.1 | catalytic activity                            | 0.035844 |
| unknown     | NA    | NA       | NA       | SJC_S000210 | NA     | NA     | NA | Sjp_0032380.1 | NA                                            | NA       |
| unknown     | NA    | NA       | NA       | SJC_S000210 | NA     | NA     | NA | Sjp_0032390.1 | NA                                            | NA       |
| unknown     | NA    | NA       | NA       | SJC_S000211 | NA     | NA     | NA | Sjp_0032400.1 | NA                                            | NA       |
| unknown     | NA    | NA       | NA       | SJC_S000211 | NA     | NA     | NA | Sjp_0032410.1 | NA                                            | NA       |
| unknown     | NA    | NA       | NA       | SJC_S000211 | NA     | NA     | NA | Sjp_0032420.1 | cell part                                     | 0.009037 |
| unknown     | NA    | NA       | NA       | SJC_S000211 | NA     | NA     | NA | Sjp_0032430.1 | binding                                       | 0.052762 |
| unknown     | NA    | NA       | NA       | SJC_S000211 | NA     | NA     | NA | Sjp_0032450.1 | NA                                            | NA       |
| unknown     | NA    | NA       | NA       | SJC_S000211 | NA     | NA     | NA | Sjp_0032460.1 | multi-organism process                        | NA       |
| unknown     | NA    | NA       | NA       | SJC_S000211 | NA     | NA     | NA | Sjp_0032470.1 | NA                                            | NA       |
| unknown     | NA    | NA       | NA       | SJC_S000211 | NA     | NA     | NA | Sjp_0032480.1 | NA                                            | NA       |
| unknown     | NA    | NA       | NA       | SJC_S000212 | NA     | NA     | NA | Sjp_0032490.1 | NA                                            | NA       |
| HSB10kb_421 | 3     | 14927621 | 14952506 | SJC_S000212 | 98479  | 117293 | -  | Sjp_0032500.1 | NA                                            | NA       |
| HSB10kb_421 | 3     | 14927621 | 14952506 | SJC_S000212 | 98479  | 117293 | -  | Sjp_0032510.1 | NA                                            | NA       |
| EBR10kb_260 | "3,3" | NA       | NA       | SJC_S000212 | 117294 | 126677 | NA | NA            | NA                                            | NA       |
| HSB10kb_422 | 3     | 14795424 | 14821270 | SJC_S000212 | 126678 | 143280 | +  | Sjp_0032520.1 | NA                                            | NA       |
| HSB10kb_422 | 3     | 14795424 | 14821270 | SJC_S000212 | 126678 | 143280 | +  | Sjp_0032530.1 | cellular component organization or biogenesis | NA       |



|             |       |          |          |             |        |        |    |               |                           |          |
|-------------|-------|----------|----------|-------------|--------|--------|----|---------------|---------------------------|----------|
| EBR10kb_261 | "3,3" | NA       | NA       | SJC_S000212 | 143281 | 160223 | NA | Sjp_0032540.1 | NA                        | NA       |
| HSB10kb_423 | 3     | 14829058 | 14887485 | SJC_S000212 | 160224 | 230600 | -  | Sjp_0032540.1 | NA                        | NA       |
| HSB10kb_423 | 3     | 14829058 | 14887485 | SJC_S000212 | 160224 | 230600 | -  | Sjp_0032550.1 | NA                        | NA       |
| HSB10kb_423 | 3     | 14829058 | 14887485 | SJC_S000212 | 160224 | 230600 | -  | Sjp_0032560.1 | NA                        | NA       |
| HSB10kb_423 | 3     | 14829058 | 14887485 | SJC_S000212 | 160224 | 230600 | -  | Sjp_0032570.1 | enzyme regulator activity | 0.1755   |
| unknown     | NA    | NA       | NA       | SJC_S000213 | NA     | NA     | NA | Sjp_0032580.1 | NA                        | NA       |
| unknown     | NA    | NA       | NA       | SJC_S000213 | NA     | NA     | NA | Sjp_0032590.1 | NA                        | NA       |
| unknown     | NA    | NA       | NA       | SJC_S000213 | NA     | NA     | NA | Sjp_0032600.1 | biological regulation     | 0.76396  |
| HSB10kb_424 | WZ    | 17460442 | 17578448 | SJC_S000213 | 113917 | 168180 | +  | Sjp_0032610.1 | NA                        | NA       |
| HSB10kb_424 | WZ    | 17460442 | 17578448 | SJC_S000213 | 113917 | 168180 | +  | Sjp_0032620.1 | biological regulation     | 0.76396  |
| HSB10kb_424 | WZ    | 17460442 | 17578448 | SJC_S000213 | 113917 | 168180 | +  | Sjp_0032630.1 | NA                        | NA       |
| HSB10kb_424 | WZ    | 17460442 | 17578448 | SJC_S000213 | 113917 | 168180 | +  | Sjp_0032640.1 | NA                        | NA       |
| unknown     | NA    | NA       | NA       | SJC_S000213 | NA     | NA     | NA | Sjp_0032650.1 | NA                        | NA       |
| unknown     | NA    | NA       | NA       | SJC_S000213 | NA     | NA     | NA | Sjp_0032660.1 | response to stimulus      | NA       |
| unknown     | NA    | NA       | NA       | SJC_S000214 | NA     | NA     | NA | Sjp_0032670.1 | catalytic activity        | 0.035844 |
| unknown     | NA    | NA       | NA       | SJC_S000214 | NA     | NA     | NA | Sjp_0032680.1 | NA                        | NA       |
| HSB10kb_425 | 3     | 14486740 | 14700379 | SJC_S000214 | 94610  | 252656 | +  | Sjp_0032690.1 | biological regulation     | 0.76396  |
| HSB10kb_425 | 3     | 14486740 | 14700379 | SJC_S000214 | 94610  | 252656 | +  | Sjp_0032700.1 | NA                        | NA       |
| HSB10kb_425 | 3     | 14486740 | 14700379 | SJC_S000214 | 94610  | 252656 | +  | Sjp_0032710.1 | cell part                 | 0.009037 |
| HSB10kb_425 | 3     | 14486740 | 14700379 | SJC_S000214 | 94610  | 252656 | +  | Sjp_0032720.1 | cell part                 | 0.009037 |
| HSB10kb_425 | 3     | 14486740 | 14700379 | SJC_S000214 | 94610  | 252656 | +  | Sjp_0032730.1 | NA                        | NA       |
| HSB10kb_425 | 3     | 14486740 | 14700379 | SJC_S000214 | 94610  | 252656 | +  | Sjp_0032740.1 | NA                        | NA       |
| HSB10kb_425 | 3     | 14486740 | 14700379 | SJC_S000214 | 94610  | 252656 | +  | Sjp_0032750.1 | NA                        | NA       |
| HSB10kb_425 | 3     | 14486740 | 14700379 | SJC_S000214 | 94610  | 252656 | +  | Sjp_0032760.1 | NA                        | NA       |
| unknown     | NA    | NA       | NA       | SJC_S000214 | NA     | NA     | NA | Sjp_0032770.1 | biological regulation     | 0.76396  |
| unknown     | NA    | NA       | NA       | SJC_S000214 | NA     | NA     | NA | Sjp_0032780.1 | NA                        | NA       |
| unknown     | NA    | NA       | NA       | SJC_S000214 | NA     | NA     | NA | Sjp_0032790.1 | NA                        | NA       |

|             |       |          |          |             |        |        |    |               |                               |          |
|-------------|-------|----------|----------|-------------|--------|--------|----|---------------|-------------------------------|----------|
| HSB10kb_426 | 1     | 45056001 | 45074288 | SJC_S000215 | 96464  | 107701 |    | Sjp_0032800.1 | NA                            | NA       |
| HSB10kb_426 | 1     | 45056001 | 45074288 | SJC_S000215 | 96464  | 107701 |    | Sjp_0032810.1 | biological regulation         | 0.76396  |
| EBR10kb_262 | "1,1" | NA       | NA       | SJC_S000215 | 107702 | 122797 | NA | Sjp_0032810.1 | biological regulation         | 0.76396  |
| HSB10kb_427 | 1     | 1669     | 86289    | SJC_S000215 | 122798 | 165527 | +  | Sjp_0032820.1 | molecular transducer activity | 0.50162  |
| unknown     | NA    | NA       | NA       | SJC_S000216 | NA     | NA     | NA | Sjp_0032830.1 | catalytic activity            | 0.035844 |
| unknown     | NA    | NA       | NA       | SJC_S000216 | NA     | NA     | NA | Sjp_0032840.1 | catalytic activity            | 0.035844 |
| unknown     | NA    | NA       | NA       | SJC_S000216 | NA     | NA     | NA | Sjp_0032850.1 | catalytic activity            | 0.035844 |
| HSB10kb_428 | WZ    | 36923789 | 36945200 | SJC_S000216 | 129602 | 158614 | -  | Sjp_0032860.1 | NA                            | NA       |
| unknown     | NA    | NA       | NA       | SJC_S000216 | NA     | NA     | NA | Sjp_0032870.1 | NA                            | NA       |
| unknown     | NA    | NA       | NA       | SJC_S000216 | NA     | NA     | NA | Sjp_0032880.1 | NA                            | NA       |
| unknown     | NA    | NA       | NA       | SJC_S000217 | NA     | NA     | NA | Sjp_0032890.1 | NA                            | NA       |
| unknown     | NA    | NA       | NA       | SJC_S000217 | NA     | NA     | NA | Sjp_0032900.1 | NA                            | NA       |
| unknown     | NA    | NA       | NA       | SJC_S000217 | NA     | NA     | NA | Sjp_0032910.1 | NA                            | NA       |
| HSB10kb_429 | 7     | 4316647  | 4643476  | SJC_S000217 | 120934 | 499093 | +  | Sjp_0032920.1 | NA                            | NA       |
| HSB10kb_429 | 7     | 4316647  | 4643476  | SJC_S000217 | 120934 | 499093 | +  | Sjp_0032930.1 | locomotion                    | NA       |
| HSB10kb_429 | 7     | 4316647  | 4643476  | SJC_S000217 | 120934 | 499093 | +  | Sjp_0032940.1 | NA                            | NA       |
| HSB10kb_429 | 7     | 4316647  | 4643476  | SJC_S000217 | 120934 | 499093 | +  | Sjp_0032950.1 | transporter activity          | 0.782    |
| HSB10kb_429 | 7     | 4316647  | 4643476  | SJC_S000217 | 120934 | 499093 | +  | Sjp_0032960.1 | transporter activity          | 0.782    |
| HSB10kb_429 | 7     | 4316647  | 4643476  | SJC_S000217 | 120934 | 499093 | +  | Sjp_0032970.1 | NA                            | NA       |
| HSB10kb_429 | 7     | 4316647  | 4643476  | SJC_S000217 | 120934 | 499093 | +  | Sjp_0032980.1 | biological regulation         | 0.76396  |
| HSB10kb_429 | 7     | 4316647  | 4643476  | SJC_S000217 | 120934 | 499093 | +  | Sjp_0032990.1 | NA                            | NA       |
| HSB10kb_429 | 7     | 4316647  | 4643476  | SJC_S000217 | 120934 | 499093 | +  | Sjp_0033000.1 | biological regulation         | 0.76396  |
| unknown     | NA    | NA       | NA       | SJC_S000217 | NA     | NA     | NA | Sjp_0033010.1 | NA                            | NA       |
| unknown     | NA    | NA       | NA       | SJC_S000217 | NA     | NA     | NA | Sjp_0033020.1 | NA                            | NA       |
| HSB10kb_430 | 6     | 13675247 | 13827369 | SJC_S000218 | 2930   | 109576 | +  | Sjp_0033030.1 | NA                            | NA       |
| HSB10kb_430 | 6     | 13675247 | 13827369 | SJC_S000218 | 2930   | 109576 | +  | Sjp_0033040.1 | NA                            | NA       |

|             |       |          |          |             |        |        |    |               |                       |          |
|-------------|-------|----------|----------|-------------|--------|--------|----|---------------|-----------------------|----------|
| HSB10kb_430 | 6     | 13675247 | 13827369 | SJC_S000218 | 2930   | 109576 | +  | Sjp_0033050.1 | NA                    | NA       |
| EBR10kb_263 | "6,1" | NA       | NA       | SJC_S000218 | 109577 | 185691 | NA | Sjp_0033060.1 | NA                    | NA       |
| HSB10kb_431 | 1     | 24122677 | 24260404 | SJC_S000218 | 185692 | 251737 | -  | Sjp_0033080.1 | biological regulation | 0.76396  |
| HSB10kb_431 | 1     | 24122677 | 24260404 | SJC_S000218 | 185692 | 251737 | -  | Sjp_0033090.1 | NA                    | NA       |
| HSB10kb_431 | 1     | 24122677 | 24260404 | SJC_S000218 | 185692 | 251737 | -  | Sjp_0033100.1 | catalytic activity    | 0.035844 |
| HSB10kb_431 | 1     | 24122677 | 24260404 | SJC_S000218 | 185692 | 251737 | -  | Sjp_0033110.1 | NA                    | NA       |
| EBR10kb_264 | "1,1" | NA       | NA       | SJC_S000218 | 251738 | 280255 | NA | Sjp_0033110.1 | NA                    | NA       |
| EBR10kb_264 | "1,1" | NA       | NA       | SJC_S000218 | 251738 | 280255 | NA | Sjp_0033120.1 | binding               | 0.052762 |
| HSB10kb_432 | 1     | 29391506 | 29425663 | SJC_S000218 | 280256 | 320831 | -  | Sjp_0033120.1 | binding               | 0.052762 |
| unknown     | NA    | NA       | NA       | SJC_S000219 | NA     | NA     | NA | Sjp_0033130.1 | NA                    | NA       |
| unknown     | NA    | NA       | NA       | SJC_S000219 | NA     | NA     | NA | Sjp_0033140.1 | NA                    | NA       |
| unknown     | NA    | NA       | NA       | SJC_S000219 | NA     | NA     | NA | Sjp_0033150.1 | NA                    | NA       |
| unknown     | NA    | NA       | NA       | SJC_S000219 | NA     | NA     | NA | Sjp_0033160.1 | NA                    | NA       |
| unknown     | NA    | NA       | NA       | SJC_S000220 | NA     | NA     | NA | Sjp_0033180.1 | NA                    | NA       |
| unknown     | NA    | NA       | NA       | SJC_S000220 | NA     | NA     | NA | Sjp_0033190.1 | biological regulation | 0.76396  |
| unknown     | NA    | NA       | NA       | SJC_S000220 | NA     | NA     | NA | Sjp_0033200.1 | binding               | 0.052762 |
| unknown     | NA    | NA       | NA       | SJC_S000220 | NA     | NA     | NA | Sjp_0033210.1 | NA                    | NA       |
| unknown     | NA    | NA       | NA       | SJC_S000221 | NA     | NA     | NA | Sjp_0033220.1 | NA                    | NA       |
| unknown     | NA    | NA       | NA       | SJC_S000221 | NA     | NA     | NA | Sjp_0033230.1 | NA                    | NA       |
| HSB10kb_433 | 3     | 3645839  | 3689338  | SJC_S000222 | 34274  | 71572  | -  | Sjp_0033240.1 | catalytic activity    | 0.035844 |
| HSB10kb_433 | 3     | 3645839  | 3689338  | SJC_S000222 | 34274  | 71572  | -  | Sjp_0033250.1 | catalytic activity    | 0.035844 |
| HSB10kb_433 | 3     | 3645839  | 3689338  | SJC_S000222 | 34274  | 71572  | -  | Sjp_0033260.1 | NA                    | NA       |
| EBR10kb_265 | "3,3" | NA       | NA       | SJC_S000222 | 71573  | 84550  | NA | Sjp_0033260.1 | NA                    | NA       |
| HSB10kb_434 | 3     | 3317421  | 3494347  | SJC_S000222 | 84551  | 277398 | +  | Sjp_0033270.1 | biological regulation | 0.76396  |
| HSB10kb_434 | 3     | 3317421  | 3494347  | SJC_S000222 | 84551  | 277398 | +  | Sjp_0033280.1 | biological regulation | 0.76396  |
| HSB10kb_434 | 3     | 3317421  | 3494347  | SJC_S000222 | 84551  | 277398 | +  | Sjp_0033290.1 | NA                    | NA       |
| HSB10kb_434 | 3     | 3317421  | 3494347  | SJC_S000222 | 84551  | 277398 | +  | Sjp_0033300.1 | NA                    | NA       |
| HSB10kb_434 | 3     | 3317421  | 3494347  | SJC_S000222 | 84551  | 277398 | +  | Sjp_0033310.1 | NA                    | NA       |
| HSB10kb_434 | 3     | 3317421  | 3494347  | SJC_S000222 | 84551  | 277398 | +  | Sjp_0033320.1 | NA                    | NA       |
| HSB10kb_434 | 3     | 3317421  | 3494347  | SJC_S000222 | 84551  | 277398 | +  | Sjp_0033330.1 | NA                    | NA       |

|             |       |          |          |             |        |        |    |               |                                                    |          |
|-------------|-------|----------|----------|-------------|--------|--------|----|---------------|----------------------------------------------------|----------|
| unknown     | NA    | NA       | NA       | SJC_S000223 | NA     | NA     | NA | Sjp_0033340.1 | NA                                                 | NA       |
| unknown     | NA    | NA       | NA       | SJC_S000223 | NA     | NA     | NA | Sjp_0033350.1 | cellular process                                   | 0.63852  |
| unknown     | NA    | NA       | NA       | SJC_S000223 | NA     | NA     | NA | Sjp_0033360.1 | NA                                                 | NA       |
| HSB10kb_435 | 7     | 3993412  | 4021618  | SJC_S000223 | 131257 | 142280 |    | NA            | NA                                                 | NA       |
| EBR10kb_266 | "7,7" | NA       | NA       | SJC_S000223 | 142281 | 156015 | NA | Sjp_0033370.1 | NA                                                 | NA       |
| HSB10kb_436 | 7     | 4188657  | 4219892  | SJC_S000223 | 156016 | 181756 | -  | Sjp_0033370.1 | NA                                                 | NA       |
| HSB10kb_436 | 7     | 4188657  | 4219892  | SJC_S000223 | 156016 | 181756 | -  | Sjp_0033380.1 | cellular process                                   | 0.63852  |
| EBR10kb_267 | "7,3" | NA       | NA       | SJC_S000223 | 181757 | 322560 | NA | Sjp_0033390.1 | NA                                                 | NA       |
| HSB10kb_437 | 3     | 8899281  | 8917946  | SJC_S000223 | 322561 | 344201 |    | Sjp_0033400.1 | NA                                                 | NA       |
| unknown     | NA    | NA       | NA       | SJC_S000224 | NA     | NA     | NA | Sjp_0033410.1 | NA                                                 | NA       |
| unknown     | NA    | NA       | NA       | SJC_S000225 | NA     | NA     | NA | Sjp_0033420.1 | NA                                                 | NA       |
| unknown     | NA    | NA       | NA       | SJC_S000225 | NA     | NA     | NA | Sjp_0033430.1 | establishment of localization                      | NA       |
| HSB10kb_438 | WZ    | 37018496 | 37033335 | SJC_S000225 | 63811  | 85792  | -  | Sjp_0033440.1 | catalytic activity                                 | 0.035844 |
| HSB10kb_439 | 3     | 8553607  | 8570858  | SJC_S000226 | 8240   | 18322  | +  | NA            | NA                                                 | NA       |
| EBR10kb_268 | "3,3" | NA       | NA       | SJC_S000226 | 18323  | 22363  | NA | Sjp_0033460.1 | NA                                                 | NA       |
| HSB10kb_440 | 3     | 8490696  | 8529343  | SJC_S000226 | 22364  | 74833  | -  | Sjp_0033460.1 | NA                                                 | NA       |
| HSB10kb_440 | 3     | 8490696  | 8529343  | SJC_S000226 | 22364  | 74833  | -  | Sjp_0033470.1 | binding                                            | 0.052762 |
| HSB10kb_440 | 3     | 8490696  | 8529343  | SJC_S000226 | 22364  | 74833  | -  | Sjp_0033480.1 | cellular process                                   | 0.63852  |
| HSB10kb_440 | 3     | 8490696  | 8529343  | SJC_S000226 | 22364  | 74833  | -  | Sjp_0033490.1 | nucleic acid binding transcription factor activity | NA       |
| EBR10kb_269 | "3,3" | NA       | NA       | SJC_S000226 | 74834  | 118170 | NA | Sjp_0033490.1 | nucleic acid binding transcription factor activity | NA       |
| EBR10kb_269 | "3,3" | NA       | NA       | SJC_S000226 | 74834  | 118170 | NA | Sjp_0033500.1 | NA                                                 | NA       |
| HSB10kb_441 | 3     | 8583271  | 8618538  | SJC_S000226 | 118171 | 142544 | +  | Sjp_0033500.1 | NA                                                 | NA       |
| EBR10kb_270 | "3,3" | NA       | NA       | SJC_S000226 | 142545 | 149557 | NA | Sjp_0033500.1 | NA                                                 | NA       |
| HSB10kb_442 | 3     | 5055046  | 5070342  | SJC_S000226 | 149558 | 165280 | -  | Sjp_0033500.1 | NA                                                 | NA       |
| HSB10kb_442 | 3     | 5055046  | 5070342  | SJC_S000226 | 149558 | 165280 | -  | Sjp_0033510.1 | NA                                                 | NA       |
| EBR10kb_271 | "3,3" | NA       | NA       | SJC_S000226 | 165281 | 208949 | NA | Sjp_0033520.1 | catalytic activity                                 | 0.035844 |
| HSB10kb_443 | 3     | 5103862  | 5127261  | SJC_S000226 | 208950 | 225386 | +  | Sjp_0033520.1 | catalytic activity                                 | 0.035844 |

|             |         |          |          |             |        |        |    |               |                                               |          |
|-------------|---------|----------|----------|-------------|--------|--------|----|---------------|-----------------------------------------------|----------|
| HSB10kb_443 | 3       | 5103862  | 5127261  | SJC_S000226 | 208950 | 225386 | +  | Sjp_0033530.1 | NA                                            | NA       |
| EBR10kb_272 | "3,3"   | NA       | NA       | SJC_S000226 | 225387 | 360145 | NA | Sjp_0033530.1 | NA                                            | NA       |
| EBR10kb_272 | "3,3"   | NA       | NA       | SJC_S000226 | 225387 | 360145 | NA | Sjp_0033540.1 | NA                                            | NA       |
| EBR10kb_272 | "3,3"   | NA       | NA       | SJC_S000226 | 225387 | 360145 | NA | Sjp_0033550.1 | NA                                            | NA       |
| EBR10kb_272 | "3,3"   | NA       | NA       | SJC_S000226 | 225387 | 360145 | NA | Sjp_0033560.1 | NA                                            | NA       |
| HSB10kb_444 | 3       | 4724687  | 4839707  | SJC_S000226 | 360146 | 446990 | -  | Sjp_0033580.1 | binding                                       | 0.052762 |
| HSB10kb_444 | 3       | 4724687  | 4839707  | SJC_S000226 | 360146 | 446990 | -  | Sjp_0033590.1 | NA                                            | NA       |
| HSB10kb_444 | 3       | 4724687  | 4839707  | SJC_S000226 | 360146 | 446990 | -  | Sjp_0033600.1 | cellular component organization or biogenesis | NA       |
| EBR10kb_273 | "3,3"   | NA       | NA       | SJC_S000226 | 446991 | 478566 | NA | Sjp_0033610.1 | establishment of localization                 | NA       |
| HSB10kb_445 | 3       | 22712321 | 22777856 | SJC_S000226 | 478567 | 501267 |    | Sjp_0033610.1 | establishment of localization                 | NA       |
| HSB10kb_446 | WZ      | 31084545 | 31114429 | SJC_S000227 | 8480   | 40135  | +  | Sjp_0033620.1 | NA                                            | NA       |
| HSB10kb_446 | WZ      | 31084545 | 31114429 | SJC_S000227 | 8480   | 40135  | +  | Sjp_0033630.1 | biological regulation                         | 0.76396  |
| EBR10kb_274 | "WZ,WZ" | NA       | NA       | SJC_S000227 | 40136  | 53634  | NA | Sjp_0033630.1 | biological regulation                         | 0.76396  |
| HSB10kb_447 | WZ      | 30864040 | 30970153 | SJC_S000227 | 53635  | 160877 | -  | Sjp_0033650.1 | molecular transducer activity                 | 0.50162  |
| HSB10kb_447 | WZ      | 30864040 | 30970153 | SJC_S000227 | 53635  | 160877 | -  | Sjp_0033660.1 | NA                                            | NA       |
| EBR10kb_275 | "WZ,7"  | NA       | NA       | SJC_S000227 | 160878 | 224363 | NA | Sjp_0033660.1 | NA                                            | NA       |
| EBR10kb_275 | "WZ,7"  | NA       | NA       | SJC_S000227 | 160878 | 224363 | NA | Sjp_0033670.1 | NA                                            | NA       |
| EBR10kb_275 | "WZ,7"  | NA       | NA       | SJC_S000227 | 160878 | 224363 | NA | Sjp_0033680.1 | NA                                            | NA       |
| EBR10kb_275 | "WZ,7"  | NA       | NA       | SJC_S000227 | 160878 | 224363 | NA | Sjp_0033690.1 | NA                                            | NA       |
| HSB10kb_448 | 7       | 6230017  | 6252668  | SJC_S000227 | 224364 | 258633 | +  | Sjp_0033700.1 | NA                                            | NA       |
| HSB10kb_448 | 7       | 6230017  | 6252668  | SJC_S000227 | 224364 | 258633 | +  | Sjp_0033710.1 | NA                                            | NA       |
| unknown     | NA      | NA       | NA       | SJC_S000227 | NA     | NA     | NA | Sjp_0033720.1 | response to stimulus                          | NA       |
| unknown     | NA      | NA       | NA       | SJC_S000227 | NA     | NA     | NA | Sjp_0033730.1 | catalytic activity                            | 0.035844 |
| unknown     | NA      | NA       | NA       | SJC_S000227 | NA     | NA     | NA | Sjp_0033740.1 | metabolic process                             | 0.41934  |

|             |       |          |          |             |        |        |    |               |                      |          |
|-------------|-------|----------|----------|-------------|--------|--------|----|---------------|----------------------|----------|
| HSB10kb_449 | 1     | 17824791 | 17874943 | SJC_S000228 | 2810   | 74314  | -  | Sjp_0033750.1 | catalytic activity   | 0.035844 |
| HSB10kb_449 | 1     | 17824791 | 17874943 | SJC_S000228 | 2810   | 74314  | -  | Sjp_0033760.1 | NA                   | NA       |
| EBR10kb_276 | "1,3" | NA       | NA       | SJC_S000228 | 74315  | 133389 | NA | Sjp_0033760.1 | NA                   | NA       |
| EBR10kb_276 | "1,3" | NA       | NA       | SJC_S000228 | 74315  | 133389 | NA | Sjp_0033770.1 | catalytic activity   | 0.035844 |
| HSB10kb_450 | 3     | 22114563 | 22292199 | SJC_S000228 | 133390 | 322122 | +  | Sjp_0033770.1 | catalytic activity   | 0.035844 |
| HSB10kb_450 | 3     | 22114563 | 22292199 | SJC_S000228 | 133390 | 322122 | +  | Sjp_0033780.1 | catalytic activity   | 0.035844 |
| HSB10kb_450 | 3     | 22114563 | 22292199 | SJC_S000228 | 133390 | 322122 | +  | Sjp_0033790.1 | NA                   | NA       |
| HSB10kb_450 | 3     | 22114563 | 22292199 | SJC_S000228 | 133390 | 322122 | +  | Sjp_0033800.1 | NA                   | NA       |
| HSB10kb_450 | 3     | 22114563 | 22292199 | SJC_S000228 | 133390 | 322122 | +  | Sjp_0033810.1 | catalytic activity   | 0.035844 |
| HSB10kb_450 | 3     | 22114563 | 22292199 | SJC_S000228 | 133390 | 322122 | +  | Sjp_0033820.1 | NA                   | NA       |
| HSB10kb_450 | 3     | 22114563 | 22292199 | SJC_S000228 | 133390 | 322122 | +  | Sjp_0033830.1 | NA                   | NA       |
| HSB10kb_450 | 3     | 22114563 | 22292199 | SJC_S000228 | 133390 | 322122 | +  | Sjp_0033840.1 | NA                   | NA       |
| HSB10kb_451 | 2     | 7638128  | 7708695  | SJC_S000229 | 43831  | 115262 | -  | Sjp_0033850.1 | binding              | 0.052762 |
| HSB10kb_451 | 2     | 7638128  | 7708695  | SJC_S000229 | 43831  | 115262 | -  | Sjp_0033860.1 | NA                   | NA       |
| HSB10kb_451 | 2     | 7638128  | 7708695  | SJC_S000229 | 43831  | 115262 | -  | Sjp_0033870.1 | NA                   | NA       |
| HSB10kb_451 | 2     | 7638128  | 7708695  | SJC_S000229 | 43831  | 115262 | -  | Sjp_0033880.1 | NA                   | NA       |
| unknown     | NA    | NA       | NA       | SJC_S000229 | NA     | NA     | NA | Sjp_0033890.1 | NA                   | NA       |
| unknown     | NA    | NA       | NA       | SJC_S000230 | NA     | NA     | NA | Sjp_0033900.1 | response to stimulus | NA       |
| HSB10kb_452 | 4     | 22929072 | 22970604 | SJC_S000230 | 70517  | 92265  | -  | Sjp_0033910.1 | NA                   | NA       |
| HSB10kb_452 | 4     | 22929072 | 22970604 | SJC_S000230 | 70517  | 92265  | -  | Sjp_0033920.1 | NA                   | NA       |
| unknown     | NA    | NA       | NA       | SJC_S000230 | NA     | NA     | NA | Sjp_0033930.1 | binding              | 0.052762 |
| unknown     | NA    | NA       | NA       | SJC_S000230 | NA     | NA     | NA | Sjp_0033940.1 | NA                   | NA       |
| unknown     | NA    | NA       | NA       | SJC_S000230 | NA     | NA     | NA | Sjp_0033950.1 | NA                   | NA       |
| unknown     | NA    | NA       | NA       | SJC_S000231 | NA     | NA     | NA | Sjp_0033960.1 | NA                   | NA       |
| unknown     | NA    | NA       | NA       | SJC_S000231 | NA     | NA     | NA | Sjp_0033970.1 | NA                   | NA       |
| HSB10kb_453 | 6     | 10941315 | 11245568 | SJC_S000232 | 16296  | 311587 | +  | Sjp_0033990.1 | NA                   | NA       |
| HSB10kb_453 | 6     | 10941315 | 11245568 | SJC_S000232 | 16296  | 311587 | +  | Sjp_0034000.1 | NA                   | NA       |
| HSB10kb_453 | 6     | 10941315 | 11245568 | SJC_S000232 | 16296  | 311587 | +  | Sjp_0034010.1 | binding              | 0.052762 |
| HSB10kb_453 | 6     | 10941315 | 11245568 | SJC_S000232 | 16296  | 311587 | +  | Sjp_0034020.1 | NA                   | NA       |
| HSB10kb_453 | 6     | 10941315 | 11245568 | SJC_S000232 | 16296  | 311587 | +  | Sjp_0034030.1 | NA                   | NA       |
| HSB10kb_453 | 6     | 10941315 | 11245568 | SJC_S000232 | 16296  | 311587 | +  | Sjp_0034040.1 | binding              | 0.052762 |
| HSB10kb_453 | 6     | 10941315 | 11245568 | SJC_S000232 | 16296  | 311587 | +  | Sjp_0034050.1 | NA                   | NA       |
| unknown     | NA    | NA       | NA       | SJC_S000232 | NA     | NA     | NA | Sjp_0034060.1 | catalytic activity   | 0.035844 |

|             |         |          |          |             |        |        |    |               |                           |          |
|-------------|---------|----------|----------|-------------|--------|--------|----|---------------|---------------------------|----------|
| unknown     | NA      | NA       | NA       | SJC_S000233 | NA     | NA     | NA | Sjp_0034070.1 | biological regulation     | 0.76396  |
| HSB10kb_454 | 1       | 45119701 | 45293113 | SJC_S000233 | 56995  | 209344 | -  | Sjp_0034080.1 | NA                        | NA       |
| HSB10kb_454 | 1       | 45119701 | 45293113 | SJC_S000233 | 56995  | 209344 | -  | Sjp_0034090.1 | binding                   | 0.052762 |
| HSB10kb_454 | 1       | 45119701 | 45293113 | SJC_S000233 | 56995  | 209344 | -  | Sjp_0034100.1 | NA                        | NA       |
| EBR10kb_277 | "1,1"   | NA       | NA       | SJC_S000233 | 209345 | 223865 | NA | Sjp_0034100.1 | NA                        | NA       |
| EBR10kb_277 | "1,1"   | NA       | NA       | SJC_S000233 | 209345 | 223865 | NA | Sjp_0034110.1 | NA                        | NA       |
| HSB10kb_455 | 1       | 45645506 | 46026751 | SJC_S000233 | 223866 | 538791 | -  | Sjp_0034110.1 | NA                        | NA       |
| HSB10kb_455 | 1       | 45645506 | 46026751 | SJC_S000233 | 223866 | 538791 | -  | Sjp_0034120.1 | extracellular region part | NA       |
| HSB10kb_455 | 1       | 45645506 | 46026751 | SJC_S000233 | 223866 | 538791 | -  | Sjp_0034130.1 | NA                        | NA       |
| HSB10kb_455 | 1       | 45645506 | 46026751 | SJC_S000233 | 223866 | 538791 | -  | Sjp_0034140.1 | NA                        | NA       |
| HSB10kb_455 | 1       | 45645506 | 46026751 | SJC_S000233 | 223866 | 538791 | -  | Sjp_0034150.1 | NA                        | NA       |
| HSB10kb_455 | 1       | 45645506 | 46026751 | SJC_S000233 | 223866 | 538791 | -  | Sjp_0034160.1 | binding                   | 0.052762 |
| HSB10kb_455 | 1       | 45645506 | 46026751 | SJC_S000233 | 223866 | 538791 | -  | Sjp_0034170.1 | NA                        | NA       |
| HSB10kb_455 | 1       | 45645506 | 46026751 | SJC_S000233 | 223866 | 538791 | -  | Sjp_0034180.1 | NA                        | NA       |
| HSB10kb_455 | 1       | 45645506 | 46026751 | SJC_S000233 | 223866 | 538791 | -  | Sjp_0034190.1 | cell part                 | 0.009037 |
| HSB10kb_455 | 1       | 45645506 | 46026751 | SJC_S000233 | 223866 | 538791 | -  | Sjp_0034200.1 | synapse part              | NA       |
| HSB10kb_456 | WZ      | 1131095  | 1259690  | SJC_S000234 | 3140   | 127151 | -  | Sjp_0034210.1 | NA                        | NA       |
| HSB10kb_456 | WZ      | 1131095  | 1259690  | SJC_S000234 | 3140   | 127151 | -  | Sjp_0034220.1 | catalytic activity        | 0.035844 |
| HSB10kb_456 | WZ      | 1131095  | 1259690  | SJC_S000234 | 3140   | 127151 | -  | Sjp_0034230.1 | NA                        | NA       |
| HSB10kb_456 | WZ      | 1131095  | 1259690  | SJC_S000234 | 3140   | 127151 | -  | Sjp_0034240.1 | NA                        | NA       |
| HSB10kb_456 | WZ      | 1131095  | 1259690  | SJC_S000234 | 3140   | 127151 | -  | Sjp_0034250.1 | enzyme regulator activity | 0.1755   |
| HSB10kb_456 | WZ      | 1131095  | 1259690  | SJC_S000234 | 3140   | 127151 | -  | Sjp_0034260.1 | NA                        | NA       |
| HSB10kb_456 | WZ      | 1131095  | 1259690  | SJC_S000234 | 3140   | 127151 | -  | Sjp_0034270.1 | NA                        | NA       |
| EBR10kb_278 | "WZ,WZ" | NA       | NA       | SJC_S000234 | 127152 | 338670 | NA | Sjp_0034280.1 | NA                        | NA       |
| EBR10kb_278 | "WZ,WZ" | NA       | NA       | SJC_S000234 | 127152 | 338670 | NA | Sjp_0034290.1 | NA                        | NA       |
| EBR10kb_278 | "WZ,WZ" | NA       | NA       | SJC_S000234 | 127152 | 338670 | NA | Sjp_0034300.1 | NA                        | NA       |
| HSB10kb_457 | WZ      | 986088   | 1016337  | SJC_S000234 | 338671 | 366112 | +  | Sjp_0034310.1 | NA                        | NA       |
| HSB10kb_458 | 5       | 3536532  | 3621097  | SJC_S000235 | 17537  | 114272 | +  | Sjp_0034320.1 | NA                        | NA       |
| HSB10kb_458 | 5       | 3536532  | 3621097  | SJC_S000235 | 17537  | 114272 | +  | Sjp_0034330.1 | NA                        | NA       |
| HSB10kb_458 | 5       | 3536532  | 3621097  | SJC_S000235 | 17537  | 114272 | +  | Sjp_0034340.1 | NA                        | NA       |

|             |       |          |          |             |        |        |    |               |                             |          |
|-------------|-------|----------|----------|-------------|--------|--------|----|---------------|-----------------------------|----------|
| HSB10kb_458 | 5     | 3536532  | 3621097  | SJC_S000235 | 17537  | 114272 | +  | Sjp_0034350.1 | biological regulation       | 0.76396  |
| EBR10kb_279 | "5,5" | NA       | NA       | SJC_S000235 | 114273 | 137180 | NA | NA            | NA                          | NA       |
| HSB10kb_459 | 5     | 3675379  | 3693124  | SJC_S000235 | 137181 | 179370 | -  | Sjp_0034360.1 | enzyme regulator activity   | 0.1755   |
| unknown     | NA    | NA       | NA       | SJC_S000235 | NA     | NA     | NA | Sjp_0034370.1 | NA                          | NA       |
| unknown     | NA    | NA       | NA       | SJC_S000235 | NA     | NA     | NA | Sjp_0034380.1 | transporter activity        | 0.782    |
| unknown     | NA    | NA       | NA       | SJC_S000235 | NA     | NA     | NA | Sjp_0034390.1 | NA                          | NA       |
| unknown     | NA    | NA       | NA       | SJC_S000235 | NA     | NA     | NA | Sjp_0034400.1 | NA                          | NA       |
| HSB10kb_460 | WZ    | 21856408 | 22127014 | SJC_S000236 | 65471  | 339940 | +  | Sjp_0034410.1 | NA                          | NA       |
| HSB10kb_460 | WZ    | 21856408 | 22127014 | SJC_S000236 | 65471  | 339940 | +  | Sjp_0034420.1 | binding                     | 0.052762 |
| HSB10kb_460 | WZ    | 21856408 | 22127014 | SJC_S000236 | 65471  | 339940 | +  | Sjp_0034430.1 | binding                     | 0.052762 |
| HSB10kb_460 | WZ    | 21856408 | 22127014 | SJC_S000236 | 65471  | 339940 | +  | Sjp_0034440.1 | NA                          | NA       |
| HSB10kb_460 | WZ    | 21856408 | 22127014 | SJC_S000236 | 65471  | 339940 | +  | Sjp_0034450.1 | NA                          | NA       |
| HSB10kb_460 | WZ    | 21856408 | 22127014 | SJC_S000236 | 65471  | 339940 | +  | Sjp_0034460.1 | cell part                   | 0.009037 |
| HSB10kb_460 | WZ    | 21856408 | 22127014 | SJC_S000236 | 65471  | 339940 | +  | Sjp_0034480.1 | binding                     | 0.052762 |
| unknown     | NA    | NA       | NA       | SJC_S000236 | NA     | NA     | NA | Sjp_0034490.1 | NA                          | NA       |
| unknown     | NA    | NA       | NA       | SJC_S000236 | NA     | NA     | NA | Sjp_0034500.1 | NA                          | NA       |
| unknown     | NA    | NA       | NA       | SJC_S000236 | NA     | NA     | NA | Sjp_0034510.1 | NA                          | NA       |
| unknown     | NA    | NA       | NA       | SJC_S000237 | NA     | NA     | NA | Sjp_0034520.1 | NA                          | NA       |
| unknown     | NA    | NA       | NA       | SJC_S000238 | NA     | NA     | NA | Sjp_0034530.1 | receptor regulator activity | NA       |
| unknown     | NA    | NA       | NA       | SJC_S000238 | NA     | NA     | NA | Sjp_0034540.1 | NA                          | NA       |
| unknown     | NA    | NA       | NA       | SJC_S000238 | NA     | NA     | NA | Sjp_0034550.1 | NA                          | NA       |
| unknown     | NA    | NA       | NA       | SJC_S000238 | NA     | NA     | NA | Sjp_0034560.1 | NA                          | NA       |
| unknown     | NA    | NA       | NA       | SJC_S000238 | NA     | NA     | NA | Sjp_0034570.1 | NA                          | NA       |
| HSB10kb_461 | 5     | 140654   | 168179   | SJC_S000238 | 79297  | 99369  | -  | Sjp_0034580.1 | cell part                   | 0.009037 |
| EBR10kb_280 | "5,5" | NA       | NA       | SJC_S000238 | 99370  | 103064 | NA | Sjp_0034580.1 | cell part                   | 0.009037 |
| HSB10kb_462 | 5     | 1032822  | 1101230  | SJC_S000238 | 103065 | 171328 |    | Sjp_0034580.1 | cell part                   | 0.009037 |
| HSB10kb_462 | 5     | 1032822  | 1101230  | SJC_S000238 | 103065 | 171328 |    | Sjp_0034590.1 | NA                          | NA       |
| HSB10kb_462 | 5     | 1032822  | 1101230  | SJC_S000238 | 103065 | 171328 |    | Sjp_0034600.1 | NA                          | NA       |



|             |       |          |          |             |        |        |    |               |                      |          |
|-------------|-------|----------|----------|-------------|--------|--------|----|---------------|----------------------|----------|
| HSB10kb_462 | 5     | 1032822  | 1101230  | SJC_S000238 | 103065 | 171328 |    | Sjp_0034610.1 | NA                   | NA       |
| EBR10kb_281 | "5,5" | NA       | NA       | SJC_S000238 | 171329 | 177370 | NA | Sjp_0034620.1 | NA                   | NA       |
| HSB10kb_463 | 5     | 64941    | 95587    | SJC_S000238 | 177371 | 204725 | -  | Sjp_0034620.1 | NA                   | NA       |
| HSB10kb_464 | 1     | 56793398 | 57065925 | SJC_S000239 | 32103  | 323879 | +  | Sjp_0034630.1 | NA                   | NA       |
| HSB10kb_464 | 1     | 56793398 | 57065925 | SJC_S000239 | 32103  | 323879 | +  | Sjp_0034640.1 | NA                   | NA       |
| HSB10kb_464 | 1     | 56793398 | 57065925 | SJC_S000239 | 32103  | 323879 | +  | Sjp_0034650.1 | NA                   | NA       |
| HSB10kb_464 | 1     | 56793398 | 57065925 | SJC_S000239 | 32103  | 323879 | +  | Sjp_0034660.1 | cell part            | 0.009037 |
| HSB10kb_464 | 1     | 56793398 | 57065925 | SJC_S000239 | 32103  | 323879 | +  | Sjp_0034670.1 | cell part            | 0.009037 |
| HSB10kb_464 | 1     | 56793398 | 57065925 | SJC_S000239 | 32103  | 323879 | +  | Sjp_0034680.1 | NA                   | NA       |
| HSB10kb_464 | 1     | 56793398 | 57065925 | SJC_S000239 | 32103  | 323879 | +  | Sjp_0034690.1 | catalytic activity   | 0.035844 |
| HSB10kb_464 | 1     | 56793398 | 57065925 | SJC_S000239 | 32103  | 323879 | +  | Sjp_0034700.1 | NA                   | NA       |
| HSB10kb_464 | 1     | 56793398 | 57065925 | SJC_S000239 | 32103  | 323879 | +  | Sjp_0034710.1 | NA                   | NA       |
| HSB10kb_464 | 1     | 56793398 | 57065925 | SJC_S000239 | 32103  | 323879 | +  | Sjp_0034720.1 | NA                   | NA       |
| HSB10kb_464 | 1     | 56793398 | 57065925 | SJC_S000239 | 32103  | 323879 | +  | Sjp_0034730.1 | NA                   | NA       |
| HSB10kb_464 | 1     | 56793398 | 57065925 | SJC_S000239 | 32103  | 323879 | +  | Sjp_0034740.1 | NA                   | NA       |
| HSB10kb_464 | 1     | 56793398 | 57065925 | SJC_S000239 | 32103  | 323879 | +  | Sjp_0034750.1 | transporter activity | 0.782    |
| HSB10kb_464 | 1     | 56793398 | 57065925 | SJC_S000239 | 32103  | 323879 | +  | Sjp_0034760.1 | NA                   | NA       |
| HSB10kb_464 | 1     | 56793398 | 57065925 | SJC_S000239 | 32103  | 323879 | +  | Sjp_0034770.1 | NA                   | NA       |
| HSB10kb_465 | WZ    | 20994475 | 21219718 | SJC_S000240 | 5698   | 210643 | -  | Sjp_0034780.1 | cell part            | 0.009037 |
| HSB10kb_465 | WZ    | 20994475 | 21219718 | SJC_S000240 | 5698   | 210643 | -  | Sjp_0034790.1 | NA                   | NA       |
| HSB10kb_465 | WZ    | 20994475 | 21219718 | SJC_S000240 | 5698   | 210643 | -  | Sjp_0034800.1 | cellular process     | 0.63852  |
| HSB10kb_465 | WZ    | 20994475 | 21219718 | SJC_S000240 | 5698   | 210643 | -  | Sjp_0034810.1 | cellular process     | 0.63852  |
| HSB10kb_465 | WZ    | 20994475 | 21219718 | SJC_S000240 | 5698   | 210643 | -  | Sjp_0034820.1 | NA                   | NA       |
| HSB10kb_465 | WZ    | 20994475 | 21219718 | SJC_S000240 | 5698   | 210643 | -  | Sjp_0034830.1 | binding              | 0.052762 |
| HSB10kb_465 | WZ    | 20994475 | 21219718 | SJC_S000240 | 5698   | 210643 | -  | Sjp_0034840.1 | NA                   | NA       |
| HSB10kb_465 | WZ    | 20994475 | 21219718 | SJC_S000240 | 5698   | 210643 | -  | Sjp_0034850.1 | NA                   | NA       |
| unknown     | NA    | NA       | NA       | SJC_S000241 | NA     | NA     | NA | Sjp_0034860.1 | NA                   | NA       |
| unknown     | NA    | NA       | NA       | SJC_S000241 | NA     | NA     | NA | Sjp_0034870.1 | NA                   | NA       |
| HSB10kb_466 | 4     | 12796594 | 12919352 | SJC_S000241 | 16417  | 152357 | +  | Sjp_0034880.1 | NA                   | NA       |
| HSB10kb_466 | 4     | 12796594 | 12919352 | SJC_S000241 | 16417  | 152357 | +  | Sjp_0034890.1 | NA                   | NA       |
| HSB10kb_466 | 4     | 12796594 | 12919352 | SJC_S000241 | 16417  | 152357 | +  | Sjp_0034900.1 | catalytic activity   | 0.035844 |
| HSB10kb_466 | 4     | 12796594 | 12919352 | SJC_S000241 | 16417  | 152357 | +  | Sjp_0034910.1 | NA                   | NA       |
| HSB10kb_466 | 4     | 12796594 | 12919352 | SJC_S000241 | 16417  | 152357 | +  | Sjp_0034920.1 | NA                   | NA       |

|             |       |          |          |             |        |        |    |               |                        |          |
|-------------|-------|----------|----------|-------------|--------|--------|----|---------------|------------------------|----------|
| HSB10kb_466 | 4     | 12796594 | 12919352 | SJC_S000241 | 16417  | 152357 | +  | Sjp_0034930.1 | NA                     | NA       |
| HSB10kb_466 | 4     | 12796594 | 12919352 | SJC_S000241 | 16417  | 152357 | +  | Sjp_0034940.1 | NA                     | NA       |
| unknown     | NA    | NA       | NA       | SJC_S000242 | NA     | NA     | NA | Sjp_0034950.1 | NA                     | NA       |
| HSB10kb_467 | 1     | 14178133 | 14195744 | SJC_S000243 | 25188  | 46429  | -  | Sjp_0034960.1 | NA                     | NA       |
| HSB10kb_467 | 1     | 14178133 | 14195744 | SJC_S000243 | 25188  | 46429  | -  | Sjp_0034970.1 | NA                     | NA       |
| HSB10kb_467 | 1     | 14178133 | 14195744 | SJC_S000243 | 25188  | 46429  | -  | Sjp_0034980.1 | cell part              | 0.009037 |
| unknown     | NA    | NA       | NA       | SJC_S000243 | NA     | NA     | NA | Sjp_0034990.1 | binding                | 0.052762 |
| unknown     | NA    | NA       | NA       | SJC_S000243 | NA     | NA     | NA | Sjp_0035000.1 | macromolecular complex | NA       |
| HSB10kb_468 | 3     | 2270909  | 2557339  | SJC_S000245 | 15903  | 251703 | +  | Sjp_0035010.1 | NA                     | NA       |
| HSB10kb_468 | 3     | 2270909  | 2557339  | SJC_S000245 | 15903  | 251703 | +  | Sjp_0035020.1 | NA                     | NA       |
| HSB10kb_468 | 3     | 2270909  | 2557339  | SJC_S000245 | 15903  | 251703 | +  | Sjp_0035030.1 | NA                     | NA       |
| HSB10kb_468 | 3     | 2270909  | 2557339  | SJC_S000245 | 15903  | 251703 | +  | Sjp_0035040.1 | response to stimulus   | NA       |
| HSB10kb_468 | 3     | 2270909  | 2557339  | SJC_S000245 | 15903  | 251703 | +  | Sjp_0035050.1 | cell part              | 0.009037 |
| HSB10kb_468 | 3     | 2270909  | 2557339  | SJC_S000245 | 15903  | 251703 | +  | Sjp_0035060.1 | NA                     | NA       |
| HSB10kb_468 | 3     | 2270909  | 2557339  | SJC_S000245 | 15903  | 251703 | +  | Sjp_0035070.1 | NA                     | NA       |
| EBR10kb_282 | "3,3" | NA       | NA       | SJC_S000245 | 251704 | 298455 | NA | Sjp_0035080.1 | NA                     | NA       |
| HSB10kb_469 | 3     | 2656156  | 2683881  | SJC_S000245 | 298456 | 327478 | -  | Sjp_0035090.1 | NA                     | NA       |
| EBR10kb_283 | "3,3" | NA       | NA       | SJC_S000245 | 327479 | 334201 | NA | Sjp_0035100.1 | binding                | 0.052762 |
| HSB10kb_470 | 3     | 2709092  | 2744320  | SJC_S000245 | 334202 | 354773 | +  | Sjp_0035100.1 | binding                | 0.052762 |
| HSB10kb_471 | 4     | 12951552 | 13005012 | SJC_S000247 | 16205  | 62022  | -  | Sjp_0035110.1 | NA                     | NA       |
| EBR10kb_284 | "4,4" | NA       | NA       | SJC_S000247 | 62023  | 64135  | NA | NA            | NA                     | NA       |
| HSB10kb_472 | 4     | 5503376  | 5519494  | SJC_S000247 | 64136  | 89676  | -  | Sjp_0035120.1 | binding                | 0.052762 |
| HSB10kb_472 | 4     | 5503376  | 5519494  | SJC_S000247 | 64136  | 89676  | -  | Sjp_0035130.1 | NA                     | NA       |
| EBR10kb_285 | "4,6" | NA       | NA       | SJC_S000247 | 89677  | 130995 | NA | Sjp_0035140.1 | NA                     | NA       |
| EBR10kb_285 | "4,6" | NA       | NA       | SJC_S000247 | 89677  | 130995 | NA | Sjp_0035150.1 | biological regulation  | 0.76396  |
| HSB10kb_473 | 6     | 9934848  | 10065067 | SJC_S000247 | 130996 | 234820 | +  | Sjp_0035150.1 | biological regulation  | 0.76396  |
| HSB10kb_473 | 6     | 9934848  | 10065067 | SJC_S000247 | 130996 | 234820 | +  | Sjp_0035160.1 | NA                     | NA       |
| HSB10kb_473 | 6     | 9934848  | 10065067 | SJC_S000247 | 130996 | 234820 | +  | Sjp_0035170.1 | NA                     | NA       |
| unknown     | NA    | NA       | NA       | SJC_S000247 | NA     | NA     | NA | Sjp_0035190.1 | NA                     | NA       |
| unknown     | NA    | NA       | NA       | SJC_S000248 | NA     | NA     | NA | Sjp_0035200.1 | catalytic activity     | 0.035844 |

|             |        |          |          |             |        |        |    |               |                       |          |
|-------------|--------|----------|----------|-------------|--------|--------|----|---------------|-----------------------|----------|
| unknown     | NA     | NA       | NA       | SJC_S000248 | NA     | NA     | NA | Sjp_0035210.1 | NA                    | NA       |
| unknown     | NA     | NA       | NA       | SJC_S000248 | NA     | NA     | NA | Sjp_0035220.1 | NA                    | NA       |
| unknown     | NA     | NA       | NA       | SJC_S000248 | NA     | NA     | NA | Sjp_0035230.1 | NA                    | NA       |
| unknown     | NA     | NA       | NA       | SJC_S000248 | NA     | NA     | NA | Sjp_0035240.1 | cell part             | 0.009037 |
| unknown     | NA     | NA       | NA       | SJC_S000248 | NA     | NA     | NA | Sjp_0035250.1 | NA                    | NA       |
| unknown     | NA     | NA       | NA       | SJC_S000248 | NA     | NA     | NA | Sjp_0035260.1 | NA                    | NA       |
| unknown     | NA     | NA       | NA       | SJC_S000248 | NA     | NA     | NA | Sjp_0035270.1 | catalytic activity    | 0.035844 |
| unknown     | NA     | NA       | NA       | SJC_S000248 | NA     | NA     | NA | Sjp_0035280.1 | NA                    | NA       |
| unknown     | NA     | NA       | NA       | SJC_S000248 | NA     | NA     | NA | Sjp_0035290.1 | NA                    | NA       |
| unknown     | NA     | NA       | NA       | SJC_S000248 | NA     | NA     | NA | Sjp_0035300.1 | catalytic activity    | 0.035844 |
| HSB10kb_474 | 6      | 5299664  | 5449705  | SJC_S000249 | 4842   | 149856 | -  | Sjp_0035320.1 | NA                    | NA       |
| HSB10kb_474 | 6      | 5299664  | 5449705  | SJC_S000249 | 4842   | 149856 | -  | Sjp_0035330.1 | NA                    | NA       |
| HSB10kb_474 | 6      | 5299664  | 5449705  | SJC_S000249 | 4842   | 149856 | -  | Sjp_0035340.1 | cell part             | 0.009037 |
| HSB10kb_474 | 6      | 5299664  | 5449705  | SJC_S000249 | 4842   | 149856 | -  | Sjp_0035350.1 | cell part             | 0.009037 |
| HSB10kb_474 | 6      | 5299664  | 5449705  | SJC_S000249 | 4842   | 149856 | -  | Sjp_0035360.1 | cell part             | 0.009037 |
| HSB10kb_474 | 6      | 5299664  | 5449705  | SJC_S000249 | 4842   | 149856 | -  | Sjp_0035370.1 | NA                    | NA       |
| EBR10kb_286 | "6,WZ" | NA       | NA       | SJC_S000249 | 149857 | 158955 | NA | Sjp_0035370.1 | NA                    | NA       |
| EBR10kb_286 | "6,WZ" | NA       | NA       | SJC_S000249 | 149857 | 158955 | NA | Sjp_0035380.1 | NA                    | NA       |
| HSB10kb_475 | WZ     | 37972206 | 37998990 | SJC_S000249 | 158956 | 177590 | +  | Sjp_0035380.1 | NA                    | NA       |
| EBR10kb_287 | "WZ,6" | NA       | NA       | SJC_S000249 | 177591 | 210823 | NA | Sjp_0035390.1 | NA                    | NA       |
| EBR10kb_287 | "WZ,6" | NA       | NA       | SJC_S000249 | 177591 | 210823 | NA | Sjp_0035400.1 | biological regulation | 0.76396  |
| HSB10kb_476 | 6      | 5227023  | 5250534  | SJC_S000249 | 210824 | 239360 | +  | Sjp_0035400.1 | biological regulation | 0.76396  |
| EBR10kb_288 | "6,6"  | NA       | NA       | SJC_S000249 | 239361 | 243562 | NA | Sjp_0035410.1 | biological regulation | 0.76396  |
| HSB10kb_477 | 6      | 5251691  | 5281210  | SJC_S000249 | 243563 | 278375 | -  | Sjp_0035410.1 | biological regulation | 0.76396  |
| HSB10kb_477 | 6      | 5251691  | 5281210  | SJC_S000249 | 243563 | 278375 | -  | Sjp_0035420.1 | catalytic activity    | 0.035844 |
| unknown     | NA     | NA       | NA       | SJC_S000250 | NA     | NA     | NA | Sjp_0035430.1 | NA                    | NA       |
| unknown     | NA     | NA       | NA       | SJC_S000250 | NA     | NA     | NA | Sjp_0035440.1 | NA                    | NA       |
| unknown     | NA     | NA       | NA       | SJC_S000250 | NA     | NA     | NA | Sjp_0035450.1 | NA                    | NA       |
| unknown     | NA     | NA       | NA       | SJC_S000250 | NA     | NA     | NA | Sjp_0035460.1 | biological regulation | 0.76396  |

|             |         |          |          |             |        |        |    |               |                                  |          |
|-------------|---------|----------|----------|-------------|--------|--------|----|---------------|----------------------------------|----------|
| unknown     | NA      | NA       | NA       | SJC_S000250 | NA     | NA     | NA | Sjp_0035470.1 | NA                               | NA       |
| unknown     | NA      | NA       | NA       | SJC_S000250 | NA     | NA     | NA | Sjp_0035480.1 | NA                               | NA       |
| unknown     | NA      | NA       | NA       | SJC_S000250 | NA     | NA     | NA | Sjp_0035490.1 | cellular process                 | 0.63852  |
| unknown     | NA      | NA       | NA       | SJC_S000250 | NA     | NA     | NA | Sjp_0035500.1 | NA                               | NA       |
| unknown     | NA      | NA       | NA       | SJC_S000250 | NA     | NA     | NA | Sjp_0035510.1 | cell part                        | 0.009037 |
| unknown     | NA      | NA       | NA       | SJC_S000250 | NA     | NA     | NA | Sjp_0035520.1 | binding                          | 0.052762 |
| unknown     | NA      | NA       | NA       | SJC_S000250 | NA     | NA     | NA | Sjp_0035530.1 | NA                               | NA       |
| unknown     | NA      | NA       | NA       | SJC_S000250 | NA     | NA     | NA | Sjp_0035540.1 | multicellular organismal process | NA       |
| unknown     | NA      | NA       | NA       | SJC_S000250 | NA     | NA     | NA | Sjp_0035550.1 | NA                               | NA       |
| unknown     | NA      | NA       | NA       | SJC_S000250 | NA     | NA     | NA | Sjp_0035560.1 | biological regulation            | 0.76396  |
| unknown     | NA      | NA       | NA       | SJC_S000250 | NA     | NA     | NA | Sjp_0035570.1 | NA                               | NA       |
| unknown     | NA      | NA       | NA       | SJC_S000250 | NA     | NA     | NA | Sjp_0035580.1 | binding                          | 0.052762 |
| unknown     | NA      | NA       | NA       | SJC_S000250 | NA     | NA     | NA | Sjp_0035590.1 | NA                               | NA       |
| unknown     | NA      | NA       | NA       | SJC_S000250 | NA     | NA     | NA | Sjp_0035600.1 | NA                               | NA       |
| unknown     | NA      | NA       | NA       | SJC_S000250 | NA     | NA     | NA | Sjp_0035610.1 | NA                               | NA       |
| unknown     | NA      | NA       | NA       | SJC_S000250 | NA     | NA     | NA | Sjp_0035620.1 | NA                               | NA       |
| unknown     | NA      | NA       | NA       | SJC_S000250 | NA     | NA     | NA | Sjp_0035630.1 | cell part                        | 0.009037 |
| HSB10kb_478 | WZ      | 37475555 | 37502421 | SJC_S000251 | 201    | 20841  | +  | Sjp_0035640.1 | catalytic activity               | 0.035844 |
| EBR10kb_289 | "WZ,WZ" | NA       | NA       | SJC_S000251 | 20842  | 28221  | NA | Sjp_0035650.1 | catalytic activity               | 0.035844 |
| HSB10kb_479 | WZ      | 37436530 | 37474034 | SJC_S000251 | 28222  | 71069  | -  | Sjp_0035650.1 | catalytic activity               | 0.035844 |
| HSB10kb_479 | WZ      | 37436530 | 37474034 | SJC_S000251 | 28222  | 71069  | -  | Sjp_0035660.1 | catalytic activity               | 0.035844 |
| EBR10kb_290 | "WZ,WZ" | NA       | NA       | SJC_S000251 | 71070  | 95316  | NA | Sjp_0035670.1 | NA                               | NA       |
| HSB10kb_480 | WZ      | 37543937 | 37657880 | SJC_S000251 | 95317  | 167617 | +  | Sjp_0035670.1 | NA                               | NA       |
| HSB10kb_480 | WZ      | 37543937 | 37657880 | SJC_S000251 | 95317  | 167617 | +  | Sjp_0035680.1 | biological regulation            | 0.76396  |
| HSB10kb_480 | WZ      | 37543937 | 37657880 | SJC_S000251 | 95317  | 167617 | +  | Sjp_0035690.1 | enzyme regulator activity        | 0.1755   |
| EBR10kb_291 | "WZ,WZ" | NA       | NA       | SJC_S000251 | 167618 | 181145 | NA | Sjp_0035700.1 | NA                               | NA       |
| EBR10kb_291 | "WZ,WZ" | NA       | NA       | SJC_S000251 | 167618 | 181145 | NA | Sjp_0035710.1 | biological regulation            | 0.76396  |

|             |         |          |          |             |        |        |    |               |                       |          |
|-------------|---------|----------|----------|-------------|--------|--------|----|---------------|-----------------------|----------|
| HSB10kb_481 | WZ      | 37369336 | 37396286 | SJC_S000251 | 181146 | 196536 | +  | Sjp_0035710.1 | biological regulation | 0.76396  |
| HSB10kb_481 | WZ      | 37369336 | 37396286 | SJC_S000251 | 181146 | 196536 | +  | Sjp_0035720.1 | NA                    | NA       |
| EBR10kb_292 | "WZ,WZ" | NA       | NA       | SJC_S000251 | 196537 | 221486 | NA | Sjp_0035720.1 | NA                    | NA       |
| EBR10kb_292 | "WZ,WZ" | NA       | NA       | SJC_S000251 | 196537 | 221486 | NA | Sjp_0035730.1 | NA                    | NA       |
| HSB10kb_482 | WZ      | 37337799 | 37366750 | SJC_S000251 | 221487 | 245467 | -  | Sjp_0035730.1 | NA                    | NA       |
| EBR10kb_293 | "WZ,WZ" | NA       | NA       | SJC_S000251 | 245468 | 261438 | NA | Sjp_0035740.1 | NA                    | NA       |
| HSB10kb_483 | WZ      | 37660789 | 37837252 | SJC_S000251 | 261439 | 404388 | +  | Sjp_0035740.1 | NA                    | NA       |
| HSB10kb_483 | WZ      | 37660789 | 37837252 | SJC_S000251 | 261439 | 404388 | +  | Sjp_0035750.1 | NA                    | NA       |
| HSB10kb_483 | WZ      | 37660789 | 37837252 | SJC_S000251 | 261439 | 404388 | +  | Sjp_0035760.1 | binding               | 0.052762 |
| unknown     | NA      | NA       | NA       | SJC_S000251 | NA     | NA     | NA | Sjp_0035780.1 | NA                    | NA       |
| HSB10kb_484 | 1       | 61387648 | 61406975 | SJC_S000252 | 5110   | 19745  | +  | Sjp_0035790.1 | catalytic activity    | 0.035844 |
| EBR10kb_294 | "1,1"   | NA       | NA       | SJC_S000252 | 19746  | 36841  | NA | Sjp_0035800.1 | NA                    | NA       |
| HSB10kb_485 | 1       | 61340738 | 61351372 | SJC_S000252 | 36842  | 53568  |    | Sjp_0035800.1 | NA                    | NA       |
| EBR10kb_295 | "1,1"   | NA       | NA       | SJC_S000252 | 53569  | 87086  | NA | Sjp_0035810.1 | NA                    | NA       |
| HSB10kb_486 | 1       | 61418318 | 61895447 | SJC_S000252 | 87087  | 489166 | +  | Sjp_0035820.1 | NA                    | NA       |
| HSB10kb_486 | 1       | 61418318 | 61895447 | SJC_S000252 | 87087  | 489166 | +  | Sjp_0035830.1 | NA                    | NA       |
| HSB10kb_486 | 1       | 61418318 | 61895447 | SJC_S000252 | 87087  | 489166 | +  | Sjp_0035850.1 | NA                    | NA       |
| HSB10kb_486 | 1       | 61418318 | 61895447 | SJC_S000252 | 87087  | 489166 | +  | Sjp_0035860.1 | NA                    | NA       |
| HSB10kb_486 | 1       | 61418318 | 61895447 | SJC_S000252 | 87087  | 489166 | +  | Sjp_0035870.1 | NA                    | NA       |
| HSB10kb_486 | 1       | 61418318 | 61895447 | SJC_S000252 | 87087  | 489166 | +  | Sjp_0035880.1 | NA                    | NA       |
| HSB10kb_486 | 1       | 61418318 | 61895447 | SJC_S000252 | 87087  | 489166 | +  | Sjp_0035890.1 | NA                    | NA       |
| HSB10kb_486 | 1       | 61418318 | 61895447 | SJC_S000252 | 87087  | 489166 | +  | Sjp_0035900.1 | cell part             | 0.009037 |
| HSB10kb_487 | 5       | 5373250  | 5750126  | SJC_S000253 | 1007   | 439926 | +  | Sjp_0035910.1 | NA                    | NA       |
| HSB10kb_487 | 5       | 5373250  | 5750126  | SJC_S000253 | 1007   | 439926 | +  | Sjp_0035920.1 | NA                    | NA       |
| HSB10kb_487 | 5       | 5373250  | 5750126  | SJC_S000253 | 1007   | 439926 | +  | Sjp_0035930.1 | NA                    | NA       |
| HSB10kb_487 | 5       | 5373250  | 5750126  | SJC_S000253 | 1007   | 439926 | +  | Sjp_0035940.1 | cellular process      | 0.63852  |
| HSB10kb_487 | 5       | 5373250  | 5750126  | SJC_S000253 | 1007   | 439926 | +  | Sjp_0035950.1 | NA                    | NA       |
| HSB10kb_487 | 5       | 5373250  | 5750126  | SJC_S000253 | 1007   | 439926 | +  | Sjp_0035960.1 | NA                    | NA       |
| HSB10kb_487 | 5       | 5373250  | 5750126  | SJC_S000253 | 1007   | 439926 | +  | Sjp_0035970.1 | metabolic process     | 0.41934  |
| HSB10kb_487 | 5       | 5373250  | 5750126  | SJC_S000253 | 1007   | 439926 | +  | Sjp_0035980.1 | catalytic activity    | 0.035844 |
| HSB10kb_487 | 5       | 5373250  | 5750126  | SJC_S000253 | 1007   | 439926 | +  | Sjp_0035990.1 | cell part             | 0.009037 |
| HSB10kb_487 | 5       | 5373250  | 5750126  | SJC_S000253 | 1007   | 439926 | +  | Sjp_0036000.1 | cell part             | 0.009037 |

|             |         |          |          |             |        |        |    |               |                               |          |
|-------------|---------|----------|----------|-------------|--------|--------|----|---------------|-------------------------------|----------|
| HSB10kb_487 | 5       | 5373250  | 5750126  | SJC_S000253 | 1007   | 439926 | +  | Sjp_0036010.1 | cellular process              | 0.63852  |
| unknown     | NA      | NA       | NA       | SJC_S000253 | NA     | NA     | NA | Sjp_0036020.1 | catalytic activity            | 0.035844 |
| unknown     | NA      | NA       | NA       | SJC_S000253 | NA     | NA     | NA | Sjp_0036030.1 | cell part                     | 0.009037 |
| unknown     | NA      | NA       | NA       | SJC_S000254 | NA     | NA     | NA | Sjp_0036040.1 | catalytic activity            | 0.035844 |
| HSB10kb_488 | 6       | 18317193 | 18439630 | SJC_S000254 | 106249 | 240503 | -  | Sjp_0036060.1 | NA                            | NA       |
| HSB10kb_488 | 6       | 18317193 | 18439630 | SJC_S000254 | 106249 | 240503 | -  | Sjp_0036070.1 | NA                            | NA       |
| HSB10kb_488 | 6       | 18317193 | 18439630 | SJC_S000254 | 106249 | 240503 | -  | Sjp_0036080.1 | NA                            | NA       |
| unknown     | NA      | NA       | NA       | SJC_S000255 | NA     | NA     | NA | Sjp_0036090.1 | NA                            | NA       |
| HSB10kb_489 | 6       | 5003713  | 5064579  | SJC_S000255 | 61712  | 117266 | -  | Sjp_0036100.1 | NA                            | NA       |
| HSB10kb_489 | 6       | 5003713  | 5064579  | SJC_S000255 | 61712  | 117266 | -  | Sjp_0036110.1 | NA                            | NA       |
| HSB10kb_489 | 6       | 5003713  | 5064579  | SJC_S000255 | 61712  | 117266 | -  | Sjp_0036120.1 | NA                            | NA       |
| EBR10kb_296 | "6,6"   | NA       | NA       | SJC_S000255 | 117267 | 131839 | NA | Sjp_0036120.1 | NA                            | NA       |
| EBR10kb_296 | "6,6"   | NA       | NA       | SJC_S000255 | 117267 | 131839 | NA | Sjp_0036130.1 | NA                            | NA       |
| HSB10kb_490 | 6       | 4984833  | 5003659  | SJC_S000255 | 131840 | 180178 | +  | Sjp_0036130.1 | NA                            | NA       |
| HSB10kb_490 | 6       | 4984833  | 5003659  | SJC_S000255 | 131840 | 180178 | +  | Sjp_0036140.1 | NA                            | NA       |
| HSB10kb_490 | 6       | 4984833  | 5003659  | SJC_S000255 | 131840 | 180178 | +  | Sjp_0036150.1 | NA                            | NA       |
| HSB10kb_491 | WZ      | 44162570 | 44515577 | SJC_S000256 | 396    | 338477 | +  | Sjp_0036160.1 | NA                            | NA       |
| HSB10kb_491 | WZ      | 44162570 | 44515577 | SJC_S000256 | 396    | 338477 | +  | Sjp_0036170.1 | molecular transducer activity | 0.50162  |
| HSB10kb_491 | WZ      | 44162570 | 44515577 | SJC_S000256 | 396    | 338477 | +  | Sjp_0036180.1 | NA                            | NA       |
| HSB10kb_491 | WZ      | 44162570 | 44515577 | SJC_S000256 | 396    | 338477 | +  | Sjp_0036190.1 | biological regulation         | 0.76396  |
| HSB10kb_491 | WZ      | 44162570 | 44515577 | SJC_S000256 | 396    | 338477 | +  | Sjp_0036200.1 | NA                            | NA       |
| HSB10kb_491 | WZ      | 44162570 | 44515577 | SJC_S000256 | 396    | 338477 | +  | Sjp_0036210.1 | catalytic activity            | 0.035844 |
| EBR10kb_297 | "WZ,WZ" | NA       | NA       | SJC_S000256 | 338478 | 355578 | NA | Sjp_0036220.1 | NA                            | NA       |
| HSB10kb_492 | WZ      | 44567817 | 44612396 | SJC_S000256 | 355579 | 400607 | -  | Sjp_0036240.1 | catalytic activity            | 0.035844 |
| unknown     | NA      | NA       | NA       | SJC_S000256 | NA     | NA     | NA | Sjp_0036270.1 | NA                            | NA       |
| unknown     | NA      | NA       | NA       | SJC_S000257 | NA     | NA     | NA | Sjp_0036280.1 | catalytic activity            | 0.035844 |
| unknown     | NA      | NA       | NA       | SJC_S000257 | NA     | NA     | NA | Sjp_0036290.1 | NA                            | NA       |
| unknown     | NA      | NA       | NA       | SJC_S000257 | NA     | NA     | NA | Sjp_0036300.1 | NA                            | NA       |
| unknown     | NA      | NA       | NA       | SJC_S000257 | NA     | NA     | NA | Sjp_0036310.1 | NA                            | NA       |
| unknown     | NA      | NA       | NA       | SJC_S000257 | NA     | NA     | NA | Sjp_0036320.1 | NA                            | NA       |
| unknown     | NA      | NA       | NA       | SJC_S000257 | NA     | NA     | NA | Sjp_0036330.1 | NA                            | NA       |

|             |       |          |          |             |        |        |    |               |                               |          |
|-------------|-------|----------|----------|-------------|--------|--------|----|---------------|-------------------------------|----------|
| unknown     | NA    | NA       | NA       | SJC_S000257 | NA     | NA     | NA | Sjp_0036340.1 | NA                            | NA       |
| unknown     | NA    | NA       | NA       | SJC_S000257 | NA     | NA     | NA | Sjp_0036350.1 | NA                            | NA       |
| unknown     | NA    | NA       | NA       | SJC_S000257 | NA     | NA     | NA | Sjp_0036360.1 | NA                            | NA       |
| unknown     | NA    | NA       | NA       | SJC_S000257 | NA     | NA     | NA | Sjp_0036370.1 | NA                            | NA       |
| unknown     | NA    | NA       | NA       | SJC_S000257 | NA     | NA     | NA | Sjp_0036380.1 | NA                            | NA       |
| unknown     | NA    | NA       | NA       | SJC_S000257 | NA     | NA     | NA | Sjp_0036390.1 | NA                            | NA       |
| unknown     | NA    | NA       | NA       | SJC_S000257 | NA     | NA     | NA | Sjp_0036400.1 | NA                            | NA       |
| unknown     | NA    | NA       | NA       | SJC_S000257 | NA     | NA     | NA | Sjp_0036410.1 | NA                            | NA       |
| unknown     | NA    | NA       | NA       | SJC_S000257 | NA     | NA     | NA | Sjp_0036420.1 | NA                            | NA       |
| unknown     | NA    | NA       | NA       | SJC_S000257 | NA     | NA     | NA | Sjp_0036430.1 | NA                            | NA       |
| HSB10kb_493 | 2     | 33224073 | 33647845 | SJC_S000258 | 1796   | 356227 | +  | Sjp_0036440.1 | cellular process              | 0.63852  |
| HSB10kb_493 | 2     | 33224073 | 33647845 | SJC_S000258 | 1796   | 356227 | +  | Sjp_0036450.1 | NA                            | NA       |
| HSB10kb_493 | 2     | 33224073 | 33647845 | SJC_S000258 | 1796   | 356227 | +  | Sjp_0036460.1 | NA                            | NA       |
| HSB10kb_493 | 2     | 33224073 | 33647845 | SJC_S000258 | 1796   | 356227 | +  | Sjp_0036470.1 | establishment of localization | NA       |
| HSB10kb_493 | 2     | 33224073 | 33647845 | SJC_S000258 | 1796   | 356227 | +  | Sjp_0036480.1 | NA                            | NA       |
| HSB10kb_493 | 2     | 33224073 | 33647845 | SJC_S000258 | 1796   | 356227 | +  | Sjp_0036490.1 | NA                            | NA       |
| HSB10kb_493 | 2     | 33224073 | 33647845 | SJC_S000258 | 1796   | 356227 | +  | Sjp_0036500.1 | NA                            | NA       |
| HSB10kb_493 | 2     | 33224073 | 33647845 | SJC_S000258 | 1796   | 356227 | +  | Sjp_0036510.1 | NA                            | NA       |
| HSB10kb_493 | 2     | 33224073 | 33647845 | SJC_S000258 | 1796   | 356227 | +  | Sjp_0036520.1 | establishment of localization | NA       |
| HSB10kb_493 | 2     | 33224073 | 33647845 | SJC_S000258 | 1796   | 356227 | +  | Sjp_0036530.1 | catalytic activity            | 0.035844 |
| HSB10kb_493 | 2     | 33224073 | 33647845 | SJC_S000258 | 1796   | 356227 | +  | Sjp_0036540.1 | catalytic activity            | 0.035844 |
| HSB10kb_493 | 2     | 33224073 | 33647845 | SJC_S000258 | 1796   | 356227 | +  | Sjp_0036550.1 | NA                            | NA       |
| HSB10kb_493 | 2     | 33224073 | 33647845 | SJC_S000258 | 1796   | 356227 | +  | Sjp_0036560.1 | NA                            | NA       |
| EBR10kb_298 | "2,1" | NA       | NA       | SJC_S000258 | 356228 | 440327 | NA | Sjp_0036560.1 | NA                            | NA       |
| EBR10kb_298 | "2,1" | NA       | NA       | SJC_S000258 | 356228 | 440327 | NA | Sjp_0036570.1 | NA                            | NA       |
| HSB10kb_494 | 1     | 1873007  | 2197546  | SJC_S000258 | 440328 | 754658 | +  | Sjp_0036580.1 | establishment of localization | NA       |
| HSB10kb_494 | 1     | 1873007  | 2197546  | SJC_S000258 | 440328 | 754658 | +  | Sjp_0036590.1 | NA                            | NA       |
| HSB10kb_494 | 1     | 1873007  | 2197546  | SJC_S000258 | 440328 | 754658 | +  | Sjp_0036600.1 | NA                            | NA       |
| HSB10kb_494 | 1     | 1873007  | 2197546  | SJC_S000258 | 440328 | 754658 | +  | Sjp_0036610.1 | biological regulation         | 0.76396  |
| HSB10kb_494 | 1     | 1873007  | 2197546  | SJC_S000258 | 440328 | 754658 | +  | Sjp_0036620.1 | NA                            | NA       |

|             |         |          |          |             |        |        |    |               |                                               |          |
|-------------|---------|----------|----------|-------------|--------|--------|----|---------------|-----------------------------------------------|----------|
| HSB10kb_494 | 1       | 1873007  | 2197546  | SJC_S000258 | 440328 | 754658 | +  | Sjp_0036630.1 | NA                                            | NA       |
| HSB10kb_494 | 1       | 1873007  | 2197546  | SJC_S000258 | 440328 | 754658 | +  | Sjp_0036640.1 | NA                                            | NA       |
| HSB10kb_494 | 1       | 1873007  | 2197546  | SJC_S000258 | 440328 | 754658 | +  | Sjp_0036650.1 | cell part                                     | 0.009037 |
| HSB10kb_494 | 1       | 1873007  | 2197546  | SJC_S000258 | 440328 | 754658 | +  | Sjp_0036660.1 | NA                                            | NA       |
| HSB10kb_494 | 1       | 1873007  | 2197546  | SJC_S000258 | 440328 | 754658 | +  | Sjp_0036670.1 | NA                                            | NA       |
| unknown     | NA      | NA       | NA       | SJC_S000259 | NA     | NA     | NA | Sjp_0036680.1 | establishment of localization                 | NA       |
| unknown     | NA      | NA       | NA       | SJC_S000259 | NA     | NA     | NA | Sjp_0036690.1 | establishment of localization                 | NA       |
| unknown     | NA      | NA       | NA       | SJC_S000259 | NA     | NA     | NA | Sjp_0036700.1 | establishment of localization                 | NA       |
| HSB10kb_495 | 1       | 20510678 | 20534393 | SJC_S000259 | 125727 | 146590 | -  | Sjp_0036710.1 | binding                                       | 0.052762 |
| EBR10kb_299 | "1,1"   | NA       | NA       | SJC_S000259 | 146591 | 186297 | NA | NA            | NA                                            | NA       |
| HSB10kb_496 | 1       | 20660786 | 20825351 | SJC_S000259 | 186298 | 317711 | +  | Sjp_0036720.1 | cellular component organization or biogenesis | NA       |
| HSB10kb_496 | 1       | 20660786 | 20825351 | SJC_S000259 | 186298 | 317711 | +  | Sjp_0036730.1 | NA                                            | NA       |
| HSB10kb_496 | 1       | 20660786 | 20825351 | SJC_S000259 | 186298 | 317711 | +  | Sjp_0036740.1 | NA                                            | NA       |
| EBR10kb_300 | "1,1"   | NA       | NA       | SJC_S000259 | 317712 | 333106 | NA | Sjp_0036750.1 | NA                                            | NA       |
| HSB10kb_497 | 1       | 22951833 | 22975565 | SJC_S000259 | 333107 | 351292 | +  | Sjp_0036750.1 | NA                                            | NA       |
| HSB10kb_497 | 1       | 22951833 | 22975565 | SJC_S000259 | 333107 | 351292 | +  | Sjp_0036760.1 | NA                                            | NA       |
| HSB10kb_498 | WZ      | 51231697 | 51277978 | SJC_S000260 | 1413   | 52303  | +  | Sjp_0036770.1 | catalytic activity                            | 0.035844 |
| HSB10kb_498 | WZ      | 51231697 | 51277978 | SJC_S000260 | 1413   | 52303  | +  | Sjp_0036780.1 | NA                                            | NA       |
| EBR10kb_301 | "WZ,WZ" | NA       | NA       | SJC_S000260 | 52304  | 126248 | NA | Sjp_0036780.1 | NA                                            | NA       |
| EBR10kb_301 | "WZ,WZ" | NA       | NA       | SJC_S000260 | 52304  | 126248 | NA | Sjp_0036790.1 | cell part                                     | 0.009037 |
| HSB10kb_499 | WZ      | 51353570 | 51531776 | SJC_S000260 | 126249 | 220626 | +  | Sjp_0036790.1 | cell part                                     | 0.009037 |
| HSB10kb_499 | WZ      | 51353570 | 51531776 | SJC_S000260 | 126249 | 220626 | +  | Sjp_0036800.1 | NA                                            | NA       |
| HSB10kb_499 | WZ      | 51353570 | 51531776 | SJC_S000260 | 126249 | 220626 | +  | Sjp_0036810.1 | NA                                            | NA       |
| HSB10kb_499 | WZ      | 51353570 | 51531776 | SJC_S000260 | 126249 | 220626 | +  | Sjp_0036820.1 | catalytic activity                            | 0.035844 |
| HSB10kb_499 | WZ      | 51353570 | 51531776 | SJC_S000260 | 126249 | 220626 | +  | Sjp_0036830.1 | catalytic activity                            | 0.035844 |
| unknown     | NA      | NA       | NA       | SJC_S000260 | NA     | NA     | NA | Sjp_0036840.1 | NA                                            | NA       |
| unknown     | NA      | NA       | NA       | SJC_S000260 | NA     | NA     | NA | Sjp_0036850.1 | NA                                            | NA       |
| HSB10kb_500 | 6       | 5514067  | 5675498  | SJC_S000261 | 10354  | 224483 | +  | Sjp_0036860.1 | catalytic activity                            | 0.035844 |



|             |       |          |          |             |        |        |    |               |                                  |          |
|-------------|-------|----------|----------|-------------|--------|--------|----|---------------|----------------------------------|----------|
| HSB10kb_500 | 6     | 5514067  | 5675498  | SJC_S000261 | 10354  | 224483 | +  | Sjp_0036870.1 | NA                               | NA       |
| HSB10kb_500 | 6     | 5514067  | 5675498  | SJC_S000261 | 10354  | 224483 | +  | Sjp_0036880.1 | NA                               | NA       |
| HSB10kb_500 | 6     | 5514067  | 5675498  | SJC_S000261 | 10354  | 224483 | +  | Sjp_0036890.1 | catalytic activity               | 0.035844 |
| HSB10kb_500 | 6     | 5514067  | 5675498  | SJC_S000261 | 10354  | 224483 | +  | Sjp_0036900.1 | transcription regulator activity | NA       |
| HSB10kb_500 | 6     | 5514067  | 5675498  | SJC_S000261 | 10354  | 224483 | +  | Sjp_0036910.1 | NA                               | NA       |
| HSB10kb_500 | 6     | 5514067  | 5675498  | SJC_S000261 | 10354  | 224483 | +  | Sjp_0036920.1 | NA                               | NA       |
| HSB10kb_500 | 6     | 5514067  | 5675498  | SJC_S000261 | 10354  | 224483 | +  | Sjp_0036930.1 | NA                               | NA       |
| unknown     | NA    | NA       | NA       | SJC_S000262 | NA     | NA     | NA | Sjp_0036940.1 | NA                               | NA       |
| unknown     | NA    | NA       | NA       | SJC_S000262 | NA     | NA     | NA | Sjp_0036950.1 | NA                               | NA       |
| unknown     | NA    | NA       | NA       | SJC_S000262 | NA     | NA     | NA | Sjp_0036960.1 | NA                               | NA       |
| unknown     | NA    | NA       | NA       | SJC_S000262 | NA     | NA     | NA | Sjp_0036970.1 | catalytic activity               | 0.035844 |
| HSB10kb_501 | 2     | 18846135 | 18901780 | SJC_S000262 | 139304 | 228594 | +  | Sjp_0036980.1 | NA                               | NA       |
| HSB10kb_501 | 2     | 18846135 | 18901780 | SJC_S000262 | 139304 | 228594 | +  | Sjp_0036990.1 | NA                               | NA       |
| EBR10kb_302 | "2,2" | NA       | NA       | SJC_S000262 | 228595 | 265892 | NA | Sjp_0037010.1 | NA                               | NA       |
| EBR10kb_302 | "2,2" | NA       | NA       | SJC_S000262 | 228595 | 265892 | NA | Sjp_0037020.1 | catalytic activity               | 0.035844 |
| HSB10kb_502 | 2     | 9853758  | 9882469  | SJC_S000262 | 265893 | 284976 | -  | Sjp_0037030.1 | NA                               | NA       |
| unknown     | NA    | NA       | NA       | SJC_S000263 | NA     | NA     | NA | Sjp_0037040.1 | NA                               | NA       |
| unknown     | NA    | NA       | NA       | SJC_S000263 | NA     | NA     | NA | Sjp_0037050.1 | NA                               | NA       |
| unknown     | NA    | NA       | NA       | SJC_S000263 | NA     | NA     | NA | Sjp_0037060.1 | NA                               | NA       |
| unknown     | NA    | NA       | NA       | SJC_S000263 | NA     | NA     | NA | Sjp_0037070.1 | NA                               | NA       |
| unknown     | NA    | NA       | NA       | SJC_S000263 | NA     | NA     | NA | Sjp_0037080.1 | NA                               | NA       |
| unknown     | NA    | NA       | NA       | SJC_S000264 | NA     | NA     | NA | Sjp_0037090.1 | biological regulation            | 0.76396  |
| unknown     | NA    | NA       | NA       | SJC_S000264 | NA     | NA     | NA | Sjp_0037100.1 | NA                               | NA       |
| unknown     | NA    | NA       | NA       | SJC_S000264 | NA     | NA     | NA | Sjp_0037110.1 | catalytic activity               | 0.035844 |
| unknown     | NA    | NA       | NA       | SJC_S000264 | NA     | NA     | NA | Sjp_0037120.1 | NA                               | NA       |
| unknown     | NA    | NA       | NA       | SJC_S000264 | NA     | NA     | NA | Sjp_0037130.1 | NA                               | NA       |
| unknown     | NA    | NA       | NA       | SJC_S000264 | NA     | NA     | NA | Sjp_0037140.1 | cell part                        | 0.009037 |
| unknown     | NA    | NA       | NA       | SJC_S000264 | NA     | NA     | NA | Sjp_0037150.1 | NA                               | NA       |
| unknown     | NA    | NA       | NA       | SJC_S000264 | NA     | NA     | NA | Sjp_0037160.1 | NA                               | NA       |
| unknown     | NA    | NA       | NA       | SJC_S000264 | NA     | NA     | NA | Sjp_0037170.1 | NA                               | NA       |
| unknown     | NA    | NA       | NA       | SJC_S000264 | NA     | NA     | NA | Sjp_0037180.1 | NA                               | NA       |

|             |    |          |          |             |       |        |    |               |                       |          |
|-------------|----|----------|----------|-------------|-------|--------|----|---------------|-----------------------|----------|
| unknown     | NA | NA       | NA       | SJC_S000264 | NA    | NA     | NA | Sjp_0037190.1 | NA                    | NA       |
| HSB10kb_503 | 6  | 16357107 | 16860074 | SJC_S000265 | 11360 | 463396 | -  | Sjp_0037200.1 | NA                    | NA       |
| HSB10kb_503 | 6  | 16357107 | 16860074 | SJC_S000265 | 11360 | 463396 | -  | Sjp_0037210.1 | NA                    | NA       |
| HSB10kb_503 | 6  | 16357107 | 16860074 | SJC_S000265 | 11360 | 463396 | -  | Sjp_0037220.1 | NA                    | NA       |
| HSB10kb_503 | 6  | 16357107 | 16860074 | SJC_S000265 | 11360 | 463396 | -  | Sjp_0037230.1 | transporter activity  | 0.782    |
| HSB10kb_503 | 6  | 16357107 | 16860074 | SJC_S000265 | 11360 | 463396 | -  | Sjp_0037240.1 | binding               | 0.052762 |
| HSB10kb_503 | 6  | 16357107 | 16860074 | SJC_S000265 | 11360 | 463396 | -  | Sjp_0037260.1 | transporter activity  | 0.782    |
| HSB10kb_503 | 6  | 16357107 | 16860074 | SJC_S000265 | 11360 | 463396 | -  | Sjp_0037270.1 | transporter activity  | 0.782    |
| HSB10kb_503 | 6  | 16357107 | 16860074 | SJC_S000265 | 11360 | 463396 | -  | Sjp_0037280.1 | NA                    | NA       |
| HSB10kb_503 | 6  | 16357107 | 16860074 | SJC_S000265 | 11360 | 463396 | -  | Sjp_0037290.1 | catalytic activity    | 0.035844 |
| unknown     | NA | NA       | NA       | SJC_S000266 | NA    | NA     | NA | Sjp_0037300.1 | biological regulation | 0.76396  |
| unknown     | NA | NA       | NA       | SJC_S000266 | NA    | NA     | NA | Sjp_0037310.1 | cell part             | 0.009037 |
| unknown     | NA | NA       | NA       | SJC_S000266 | NA    | NA     | NA | Sjp_0037320.1 | cellular process      | 0.63852  |
| unknown     | NA | NA       | NA       | SJC_S000266 | NA    | NA     | NA | Sjp_0037330.1 | catalytic activity    | 0.035844 |
| unknown     | NA | NA       | NA       | SJC_S000266 | NA    | NA     | NA | Sjp_0037340.1 | catalytic activity    | 0.035844 |
| unknown     | NA | NA       | NA       | SJC_S000266 | NA    | NA     | NA | Sjp_0037350.1 | NA                    | NA       |
| unknown     | NA | NA       | NA       | SJC_S000266 | NA    | NA     | NA | Sjp_0037360.1 | NA                    | NA       |
| unknown     | NA | NA       | NA       | SJC_S000266 | NA    | NA     | NA | Sjp_0037370.1 | NA                    | NA       |
| unknown     | NA | NA       | NA       | SJC_S000266 | NA    | NA     | NA | Sjp_0037380.1 | NA                    | NA       |
| unknown     | NA | NA       | NA       | SJC_S000266 | NA    | NA     | NA | Sjp_0037390.1 | NA                    | NA       |
| HSB10kb_504 | WZ | 55606994 | 55842841 | SJC_S000267 | 13541 | 169566 | -  | Sjp_0037400.1 | NA                    | NA       |
| HSB10kb_504 | WZ | 55606994 | 55842841 | SJC_S000267 | 13541 | 169566 | -  | Sjp_0037410.1 | NA                    | NA       |
| HSB10kb_504 | WZ | 55606994 | 55842841 | SJC_S000267 | 13541 | 169566 | -  | Sjp_0037420.1 | NA                    | NA       |
| HSB10kb_504 | WZ | 55606994 | 55842841 | SJC_S000267 | 13541 | 169566 | -  | Sjp_0037430.1 | cellular process      | 0.63852  |
| HSB10kb_504 | WZ | 55606994 | 55842841 | SJC_S000267 | 13541 | 169566 | -  | Sjp_0037440.1 | catalytic activity    | 0.035844 |
| HSB10kb_505 | 2  | 17394061 | 17703506 | SJC_S000268 | 15640 | 252184 | +  | Sjp_0037450.1 | catalytic activity    | 0.035844 |
| HSB10kb_505 | 2  | 17394061 | 17703506 | SJC_S000268 | 15640 | 252184 | +  | Sjp_0037460.1 | metabolic process     | 0.41934  |
| HSB10kb_505 | 2  | 17394061 | 17703506 | SJC_S000268 | 15640 | 252184 | +  | Sjp_0037470.1 | NA                    | NA       |
| HSB10kb_505 | 2  | 17394061 | 17703506 | SJC_S000268 | 15640 | 252184 | +  | Sjp_0037480.1 | NA                    | NA       |

|             |       |          |          |             |        |        |    |               |                               |          |
|-------------|-------|----------|----------|-------------|--------|--------|----|---------------|-------------------------------|----------|
| HSB10kb_505 | 2     | 17394061 | 17703506 | SJC_S000268 | 15640  | 252184 | +  | Sjp_0037490.1 | NA                            | NA       |
| unknown     | NA    | NA       | NA       | SJC_S000269 | NA     | NA     | NA | Sjp_0037500.1 | catalytic activity            | 0.035844 |
| unknown     | NA    | NA       | NA       | SJC_S000269 | NA     | NA     | NA | Sjp_0037510.1 | NA                            | NA       |
| HSB10kb_506 | WZ    | 31678464 | 31783829 | SJC_S000269 | 139366 | 232562 | -  | Sjp_0037520.1 | NA                            | NA       |
| HSB10kb_506 | WZ    | 31678464 | 31783829 | SJC_S000269 | 139366 | 232562 | -  | Sjp_0037530.1 | NA                            | NA       |
| HSB10kb_506 | WZ    | 31678464 | 31783829 | SJC_S000269 | 139366 | 232562 | -  | Sjp_0037540.1 | NA                            | NA       |
| HSB10kb_506 | WZ    | 31678464 | 31783829 | SJC_S000269 | 139366 | 232562 | -  | Sjp_0037550.1 | NA                            | NA       |
| HSB10kb_506 | WZ    | 31678464 | 31783829 | SJC_S000269 | 139366 | 232562 | -  | Sjp_0037560.1 | NA                            | NA       |
| HSB10kb_506 | WZ    | 31678464 | 31783829 | SJC_S000269 | 139366 | 232562 | -  | Sjp_0037570.1 | NA                            | NA       |
| HSB10kb_507 | 1     | 29447567 | 29821370 | SJC_S000270 | 843    | 316420 | +  | Sjp_0037580.1 | NA                            | NA       |
| HSB10kb_507 | 1     | 29447567 | 29821370 | SJC_S000270 | 843    | 316420 | +  | Sjp_0037590.1 | NA                            | NA       |
| HSB10kb_507 | 1     | 29447567 | 29821370 | SJC_S000270 | 843    | 316420 | +  | Sjp_0037600.1 | binding                       | 0.052762 |
| HSB10kb_507 | 1     | 29447567 | 29821370 | SJC_S000270 | 843    | 316420 | +  | Sjp_0037610.1 | molecular transducer activity | 0.50162  |
| HSB10kb_507 | 1     | 29447567 | 29821370 | SJC_S000270 | 843    | 316420 | +  | Sjp_0037620.1 | NA                            | NA       |
| HSB10kb_507 | 1     | 29447567 | 29821370 | SJC_S000270 | 843    | 316420 | +  | Sjp_0037630.1 | NA                            | NA       |
| HSB10kb_507 | 1     | 29447567 | 29821370 | SJC_S000270 | 843    | 316420 | +  | Sjp_0037640.1 | catalytic activity            | 0.035844 |
| HSB10kb_507 | 1     | 29447567 | 29821370 | SJC_S000270 | 843    | 316420 | +  | Sjp_0037650.1 | cell part                     | 0.009037 |
| HSB10kb_507 | 1     | 29447567 | 29821370 | SJC_S000270 | 843    | 316420 | +  | Sjp_0037660.1 | NA                            | NA       |
| HSB10kb_507 | 1     | 29447567 | 29821370 | SJC_S000270 | 843    | 316420 | +  | Sjp_0037670.1 | NA                            | NA       |
| HSB10kb_507 | 1     | 29447567 | 29821370 | SJC_S000270 | 843    | 316420 | +  | Sjp_0037680.1 | binding                       | 0.052762 |
| HSB10kb_507 | 1     | 29447567 | 29821370 | SJC_S000270 | 843    | 316420 | +  | Sjp_0037690.1 | cellular process              | 0.63852  |
| HSB10kb_507 | 1     | 29447567 | 29821370 | SJC_S000270 | 843    | 316420 | +  | Sjp_0037700.1 | NA                            | NA       |
| HSB10kb_507 | 1     | 29447567 | 29821370 | SJC_S000270 | 843    | 316420 | +  | Sjp_0037710.1 | NA                            | NA       |
| HSB10kb_507 | 1     | 29447567 | 29821370 | SJC_S000270 | 843    | 316420 | +  | Sjp_0037720.1 | catalytic activity            | 0.035844 |
| HSB10kb_507 | 1     | 29447567 | 29821370 | SJC_S000270 | 843    | 316420 | +  | Sjp_0037730.1 | cell part                     | 0.009037 |
| EBR10kb_303 | "1,1" | NA       | NA       | SJC_S000270 | 316421 | 318823 | NA | NA            | NA                            | NA       |
| HSB10kb_508 | 1     | 29843138 | 29917042 | SJC_S000270 | 318824 | 384633 | -  | Sjp_0037740.1 | metabolic process             | 0.41934  |
| HSB10kb_508 | 1     | 29843138 | 29917042 | SJC_S000270 | 318824 | 384633 | -  | Sjp_0037750.1 | NA                            | NA       |
| HSB10kb_508 | 1     | 29843138 | 29917042 | SJC_S000270 | 318824 | 384633 | -  | Sjp_0037760.1 | NA                            | NA       |
| HSB10kb_508 | 1     | 29843138 | 29917042 | SJC_S000270 | 318824 | 384633 | -  | Sjp_0037770.1 | NA                            | NA       |
| EBR10kb_304 | "1,1" | NA       | NA       | SJC_S000270 | 384634 | 389335 | NA | Sjp_0037770.1 | NA                            | NA       |

|             |    |          |          |             |        |        |    |               |                            |          |
|-------------|----|----------|----------|-------------|--------|--------|----|---------------|----------------------------|----------|
| HSB10kb_509 | 1  | 29919064 | 29956955 | SJC_S000270 | 389336 | 422506 | +  | Sjp_0037770.1 | NA                         | NA       |
| HSB10kb_510 | 1  | 60315440 | 60617921 | SJC_S000271 | 13586  | 337370 | +  | Sjp_0037780.1 | NA                         | NA       |
| HSB10kb_510 | 1  | 60315440 | 60617921 | SJC_S000271 | 13586  | 337370 | +  | Sjp_0037790.1 | biological regulation      | 0.76396  |
| HSB10kb_510 | 1  | 60315440 | 60617921 | SJC_S000271 | 13586  | 337370 | +  | Sjp_0037800.1 | NA                         | NA       |
| HSB10kb_510 | 1  | 60315440 | 60617921 | SJC_S000271 | 13586  | 337370 | +  | Sjp_0037810.1 | NA                         | NA       |
| HSB10kb_510 | 1  | 60315440 | 60617921 | SJC_S000271 | 13586  | 337370 | +  | Sjp_0037820.1 | NA                         | NA       |
| HSB10kb_510 | 1  | 60315440 | 60617921 | SJC_S000271 | 13586  | 337370 | +  | Sjp_0037830.1 | channel regulator activity | NA       |
| HSB10kb_510 | 1  | 60315440 | 60617921 | SJC_S000271 | 13586  | 337370 | +  | Sjp_0037840.1 | NA                         | NA       |
| HSB10kb_510 | 1  | 60315440 | 60617921 | SJC_S000271 | 13586  | 337370 | +  | Sjp_0037850.1 | NA                         | NA       |
| HSB10kb_510 | 1  | 60315440 | 60617921 | SJC_S000271 | 13586  | 337370 | +  | Sjp_0037860.1 | NA                         | NA       |
| HSB10kb_511 | WZ | 50257670 | 50578725 | SJC_S000272 | 1      | 311127 | +  | Sjp_0037870.1 | NA                         | NA       |
| HSB10kb_511 | WZ | 50257670 | 50578725 | SJC_S000272 | 1      | 311127 | +  | Sjp_0037880.1 | NA                         | NA       |
| HSB10kb_511 | WZ | 50257670 | 50578725 | SJC_S000272 | 1      | 311127 | +  | Sjp_0037890.1 | NA                         | NA       |
| HSB10kb_511 | WZ | 50257670 | 50578725 | SJC_S000272 | 1      | 311127 | +  | Sjp_0037900.1 | NA                         | NA       |
| HSB10kb_511 | WZ | 50257670 | 50578725 | SJC_S000272 | 1      | 311127 | +  | Sjp_0037910.1 | NA                         | NA       |
| HSB10kb_511 | WZ | 50257670 | 50578725 | SJC_S000272 | 1      | 311127 | +  | Sjp_0037920.1 | biological regulation      | 0.76396  |
| HSB10kb_511 | WZ | 50257670 | 50578725 | SJC_S000272 | 1      | 311127 | +  | Sjp_0037930.1 | cell part                  | 0.009037 |
| HSB10kb_511 | WZ | 50257670 | 50578725 | SJC_S000272 | 1      | 311127 | +  | Sjp_0037940.1 | NA                         | NA       |
| HSB10kb_511 | WZ | 50257670 | 50578725 | SJC_S000272 | 1      | 311127 | +  | Sjp_0037950.1 | transporter activity       | 0.782    |
| HSB10kb_511 | WZ | 50257670 | 50578725 | SJC_S000272 | 1      | 311127 | +  | Sjp_0037960.1 | NA                         | NA       |
| unknown     | NA | NA       | NA       | SJC_S000272 | NA     | NA     | NA | Sjp_0037970.1 | NA                         | NA       |
| unknown     | NA | NA       | NA       | SJC_S000272 | NA     | NA     | NA | Sjp_0037980.1 | biological regulation      | 0.76396  |
| unknown     | NA | NA       | NA       | SJC_S000273 | NA     | NA     | NA | Sjp_0037990.1 | NA                         | NA       |
| unknown     | NA | NA       | NA       | SJC_S000273 | NA     | NA     | NA | Sjp_0038000.1 | NA                         | NA       |
| unknown     | NA | NA       | NA       | SJC_S000274 | NA     | NA     | NA | Sjp_0038010.1 | NA                         | NA       |
| unknown     | NA | NA       | NA       | SJC_S000274 | NA     | NA     | NA | Sjp_0038020.1 | NA                         | NA       |
| unknown     | NA | NA       | NA       | SJC_S000274 | NA     | NA     | NA | Sjp_0038030.1 | NA                         | NA       |
| unknown     | NA | NA       | NA       | SJC_S000274 | NA     | NA     | NA | Sjp_0038040.1 | NA                         | NA       |

|             |    |          |          |             |        |        |    |               |                       |          |
|-------------|----|----------|----------|-------------|--------|--------|----|---------------|-----------------------|----------|
| unknown     | NA | NA       | NA       | SJC_S000274 | NA     | NA     | NA | Sjp_0038050.1 | cell part             | 0.009037 |
| unknown     | NA | NA       | NA       | SJC_S000275 | NA     | NA     | NA | Sjp_0038060.1 | binding               | 0.052762 |
| unknown     | NA | NA       | NA       | SJC_S000276 | NA     | NA     | NA | Sjp_0038080.1 | catalytic activity    | 0.035844 |
| unknown     | NA | NA       | NA       | SJC_S000276 | NA     | NA     | NA | Sjp_0038090.1 | NA                    | NA       |
| unknown     | NA | NA       | NA       | SJC_S000276 | NA     | NA     | NA | Sjp_0038100.1 | NA                    | NA       |
| HSB10kb_512 | 1  | 51336568 | 51353734 | SJC_S000277 | 19939  | 45313  | -  | Sjp_0038110.1 | NA                    | NA       |
| unknown     | NA | NA       | NA       | SJC_S000277 | NA     | NA     | NA | Sjp_0038120.1 | NA                    | NA       |
| unknown     | NA | NA       | NA       | SJC_S000277 | NA     | NA     | NA | Sjp_0038130.1 | NA                    | NA       |
| unknown     | NA | NA       | NA       | SJC_S000278 | NA     | NA     | NA | Sjp_0038150.1 | NA                    | NA       |
| HSB10kb_513 | 1  | 24669839 | 24884508 | SJC_S000278 | 33793  | 262790 | -  | Sjp_0038170.1 | cellular process      | 0.63852  |
| HSB10kb_513 | 1  | 24669839 | 24884508 | SJC_S000278 | 33793  | 262790 | -  | Sjp_0038180.1 | NA                    | NA       |
| HSB10kb_513 | 1  | 24669839 | 24884508 | SJC_S000278 | 33793  | 262790 | -  | Sjp_0038190.1 | NA                    | NA       |
| HSB10kb_513 | 1  | 24669839 | 24884508 | SJC_S000278 | 33793  | 262790 | -  | Sjp_0038200.1 | NA                    | NA       |
| HSB10kb_513 | 1  | 24669839 | 24884508 | SJC_S000278 | 33793  | 262790 | -  | Sjp_0038210.1 | NA                    | NA       |
| HSB10kb_513 | 1  | 24669839 | 24884508 | SJC_S000278 | 33793  | 262790 | -  | Sjp_0038220.1 | NA                    | NA       |
| HSB10kb_513 | 1  | 24669839 | 24884508 | SJC_S000278 | 33793  | 262790 | -  | Sjp_0038230.1 | NA                    | NA       |
| HSB10kb_513 | 1  | 24669839 | 24884508 | SJC_S000278 | 33793  | 262790 | -  | Sjp_0038240.1 | metabolic process     | 0.41934  |
| HSB10kb_513 | 1  | 24669839 | 24884508 | SJC_S000278 | 33793  | 262790 | -  | Sjp_0038250.1 | binding               | 0.052762 |
| unknown     | NA | NA       | NA       | SJC_S000278 | NA     | NA     | NA | Sjp_0038260.1 | NA                    | NA       |
| unknown     | NA | NA       | NA       | SJC_S000279 | NA     | NA     | NA | Sjp_0038270.1 | NA                    | NA       |
| unknown     | NA | NA       | NA       | SJC_S000279 | NA     | NA     | NA | Sjp_0038280.1 | NA                    | NA       |
| unknown     | NA | NA       | NA       | SJC_S000279 | NA     | NA     | NA | Sjp_0038290.1 | catalytic activity    | 0.035844 |
| unknown     | NA | NA       | NA       | SJC_S000279 | NA     | NA     | NA | Sjp_0038300.1 | catalytic activity    | 0.035844 |
| unknown     | NA | NA       | NA       | SJC_S000279 | NA     | NA     | NA | Sjp_0038310.1 | NA                    | NA       |
| unknown     | NA | NA       | NA       | SJC_S000279 | NA     | NA     | NA | Sjp_0038320.1 | NA                    | NA       |
| HSB10kb_514 | 1  | 2894892  | 3038513  | SJC_S000279 | 211541 | 294903 | -  | Sjp_0038330.1 | NA                    | NA       |
| HSB10kb_514 | 1  | 2894892  | 3038513  | SJC_S000279 | 211541 | 294903 | -  | Sjp_0038340.1 | catalytic activity    | 0.035844 |
| unknown     | NA | NA       | NA       | SJC_S000280 | NA     | NA     | NA | Sjp_0038350.1 | biological regulation | 0.76396  |
| unknown     | NA | NA       | NA       | SJC_S000280 | NA     | NA     | NA | Sjp_0038360.1 | NA                    | NA       |
| unknown     | NA | NA       | NA       | SJC_S000280 | NA     | NA     | NA | Sjp_0038380.1 | NA                    | NA       |
| unknown     | NA | NA       | NA       | SJC_S000280 | NA     | NA     | NA | Sjp_0038390.1 | NA                    | NA       |
| unknown     | NA | NA       | NA       | SJC_S000280 | NA     | NA     | NA | Sjp_0038400.1 | NA                    | NA       |

|             |       |          |          |             |        |        |    |               |                               |          |
|-------------|-------|----------|----------|-------------|--------|--------|----|---------------|-------------------------------|----------|
| unknown     | NA    | NA       | NA       | SJC_S000280 | NA     | NA     | NA | Sjp_0038410.1 | biological regulation         | 0.76396  |
| HSB10kb_515 | 3     | 1540397  | 1962703  | SJC_S000281 | 9184   | 382474 | +  | Sjp_0038420.1 | NA                            | NA       |
| HSB10kb_515 | 3     | 1540397  | 1962703  | SJC_S000281 | 9184   | 382474 | +  | Sjp_0038430.1 | establishment of localization | NA       |
| HSB10kb_515 | 3     | 1540397  | 1962703  | SJC_S000281 | 9184   | 382474 | +  | Sjp_0038440.1 | NA                            | NA       |
| HSB10kb_515 | 3     | 1540397  | 1962703  | SJC_S000281 | 9184   | 382474 | +  | Sjp_0038450.1 | cell part                     | 0.009037 |
| HSB10kb_515 | 3     | 1540397  | 1962703  | SJC_S000281 | 9184   | 382474 | +  | Sjp_0038460.1 | NA                            | NA       |
| HSB10kb_515 | 3     | 1540397  | 1962703  | SJC_S000281 | 9184   | 382474 | +  | Sjp_0038470.1 | cell part                     | 0.009037 |
| HSB10kb_515 | 3     | 1540397  | 1962703  | SJC_S000281 | 9184   | 382474 | +  | Sjp_0038480.1 | NA                            | NA       |
| unknown     | NA    | NA       | NA       | SJC_S000281 | NA     | NA     | NA | Sjp_0038490.1 | NA                            | NA       |
| HSB10kb_516 | 4     | 28242160 | 28443743 | SJC_S000282 | 12550  | 235308 | +  | Sjp_0038500.1 | NA                            | NA       |
| HSB10kb_516 | 4     | 28242160 | 28443743 | SJC_S000282 | 12550  | 235308 | +  | Sjp_0038510.1 | NA                            | NA       |
| HSB10kb_516 | 4     | 28242160 | 28443743 | SJC_S000282 | 12550  | 235308 | +  | Sjp_0038520.1 | NA                            | NA       |
| HSB10kb_516 | 4     | 28242160 | 28443743 | SJC_S000282 | 12550  | 235308 | +  | Sjp_0038530.1 | NA                            | NA       |
| HSB10kb_516 | 4     | 28242160 | 28443743 | SJC_S000282 | 12550  | 235308 | +  | Sjp_0038540.1 | NA                            | NA       |
| EBR10kb_305 | "4,1" | NA       | NA       | SJC_S000282 | 235309 | 245961 | NA | Sjp_0038540.1 | NA                            | NA       |
| EBR10kb_305 | "4,1" | NA       | NA       | SJC_S000282 | 235309 | 245961 | NA | Sjp_0038550.1 | metabolic process             | 0.41934  |
| HSB10kb_517 | 1     | 46057305 | 46083575 | SJC_S000282 | 245962 | 262813 | +  | Sjp_0038550.1 | metabolic process             | 0.41934  |
| HSB10kb_517 | 1     | 46057305 | 46083575 | SJC_S000282 | 245962 | 262813 | +  | Sjp_0038560.1 | NA                            | NA       |
| unknown     | NA    | NA       | NA       | SJC_S000282 | NA     | NA     | NA | Sjp_0038570.1 | binding                       | 0.052762 |
| unknown     | NA    | NA       | NA       | SJC_S000283 | NA     | NA     | NA | Sjp_0038580.1 | NA                            | NA       |
| unknown     | NA    | NA       | NA       | SJC_S000283 | NA     | NA     | NA | Sjp_0038590.1 | metabolic process             | 0.41934  |
| unknown     | NA    | NA       | NA       | SJC_S000283 | NA     | NA     | NA | Sjp_0038600.1 | cell part                     | 0.009037 |
| unknown     | NA    | NA       | NA       | SJC_S000283 | NA     | NA     | NA | Sjp_0038610.1 | metabolic process             | 0.41934  |
| unknown     | NA    | NA       | NA       | SJC_S000283 | NA     | NA     | NA | Sjp_0038620.1 | NA                            | NA       |
| HSB10kb_518 | 1     | 15618819 | 15685091 | SJC_S000283 | 148594 | 206130 | -  | Sjp_0038630.1 | NA                            | NA       |
| HSB10kb_518 | 1     | 15618819 | 15685091 | SJC_S000283 | 148594 | 206130 | -  | Sjp_0038640.1 | metabolic process             | 0.41934  |
| HSB10kb_518 | 1     | 15618819 | 15685091 | SJC_S000283 | 148594 | 206130 | -  | Sjp_0038650.1 | NA                            | NA       |

|             |    |          |          |             |        |        |    |               |                                  |          |
|-------------|----|----------|----------|-------------|--------|--------|----|---------------|----------------------------------|----------|
| unknown     | NA | NA       | NA       | SJC_S000283 | NA     | NA     | NA | Sjp_0038660.1 | NA                               | NA       |
| unknown     | NA | NA       | NA       | SJC_S000283 | NA     | NA     | NA | Sjp_0038670.1 | NA                               | NA       |
| unknown     | NA | NA       | NA       | SJC_S000283 | NA     | NA     | NA | Sjp_0038680.1 | NA                               | NA       |
| unknown     | NA | NA       | NA       | SJC_S000284 | NA     | NA     | NA | Sjp_0038690.1 | biological regulation            | 0.76396  |
| unknown     | NA | NA       | NA       | SJC_S000284 | NA     | NA     | NA | Sjp_0038700.1 | NA                               | NA       |
| unknown     | NA | NA       | NA       | SJC_S000285 | NA     | NA     | NA | Sjp_0038710.1 | NA                               | NA       |
| unknown     | NA | NA       | NA       | SJC_S000285 | NA     | NA     | NA | Sjp_0038720.1 | NA                               | NA       |
| HSB10kb_519 | 2  | 6798995  | 6853337  | SJC_S000285 | 122181 | 174276 | -  | Sjp_0038730.1 | NA                               | NA       |
| HSB10kb_519 | 2  | 6798995  | 6853337  | SJC_S000285 | 122181 | 174276 | -  | Sjp_0038740.1 | NA                               | NA       |
| HSB10kb_519 | 2  | 6798995  | 6853337  | SJC_S000285 | 122181 | 174276 | -  | Sjp_0038750.1 | cell part                        | 0.009037 |
| unknown     | NA | NA       | NA       | SJC_S000285 | NA     | NA     | NA | Sjp_0038760.1 | response to stimulus             | NA       |
| unknown     | NA | NA       | NA       | SJC_S000286 | NA     | NA     | NA | Sjp_0038770.1 | biological regulation            | 0.76396  |
| unknown     | NA | NA       | NA       | SJC_S000286 | NA     | NA     | NA | Sjp_0038780.1 | NA                               | NA       |
| unknown     | NA | NA       | NA       | SJC_S000287 | NA     | NA     | NA | Sjp_0038790.1 | NA                               | NA       |
| unknown     | NA | NA       | NA       | SJC_S000287 | NA     | NA     | NA | Sjp_0038800.1 | binding                          | 0.052762 |
| unknown     | NA | NA       | NA       | SJC_S000287 | NA     | NA     | NA | Sjp_0038810.1 | cell part                        | 0.009037 |
| unknown     | NA | NA       | NA       | SJC_S000287 | NA     | NA     | NA | Sjp_0038820.1 | NA                               | NA       |
| unknown     | NA | NA       | NA       | SJC_S000287 | NA     | NA     | NA | Sjp_0038830.1 | NA                               | NA       |
| unknown     | NA | NA       | NA       | SJC_S000288 | NA     | NA     | NA | Sjp_0038840.1 | transcription regulator activity | NA       |
| unknown     | NA | NA       | NA       | SJC_S000288 | NA     | NA     | NA | Sjp_0038850.1 | binding                          | 0.052762 |
| HSB10kb_520 | WZ | 57501381 | 57525573 | SJC_S000288 | 99880  | 127461 | +  | Sjp_0038860.1 | NA                               | NA       |
| HSB10kb_520 | WZ | 57501381 | 57525573 | SJC_S000288 | 99880  | 127461 | +  | Sjp_0038870.1 | NA                               | NA       |
| HSB10kb_520 | WZ | 57501381 | 57525573 | SJC_S000288 | 99880  | 127461 | +  | Sjp_0038880.1 | transporter activity             | 0.782    |
| unknown     | NA | NA       | NA       | SJC_S000288 | NA     | NA     | NA | Sjp_0038890.1 | NA                               | NA       |
| unknown     | NA | NA       | NA       | SJC_S000288 | NA     | NA     | NA | Sjp_0038900.1 | NA                               | NA       |
| unknown     | NA | NA       | NA       | SJC_S000289 | NA     | NA     | NA | Sjp_0038910.1 | NA                               | NA       |
| unknown     | NA | NA       | NA       | SJC_S000289 | NA     | NA     | NA | Sjp_0038920.1 | NA                               | NA       |
| unknown     | NA | NA       | NA       | SJC_S000290 | NA     | NA     | NA | Sjp_0038930.1 | NA                               | NA       |

|             |        |          |          |             |        |        |    |               |                           |          |
|-------------|--------|----------|----------|-------------|--------|--------|----|---------------|---------------------------|----------|
| unknown     | NA     | NA       | NA       | SJC_S000290 | NA     | NA     | NA | Sjp_0038940.1 | NA                        | NA       |
| unknown     | NA     | NA       | NA       | SJC_S000290 | NA     | NA     | NA | Sjp_0038950.1 | enzyme regulator activity | 0.1755   |
| unknown     | NA     | NA       | NA       | SJC_S000290 | NA     | NA     | NA | Sjp_0038960.1 | NA                        | NA       |
| unknown     | NA     | NA       | NA       | SJC_S000290 | NA     | NA     | NA | Sjp_0038970.1 | NA                        | NA       |
| unknown     | NA     | NA       | NA       | SJC_S000290 | NA     | NA     | NA | Sjp_0038980.1 | NA                        | NA       |
| HSB10kb_521 | 6      | 9410397  | 9477665  | SJC_S000290 | 97399  | 142186 | -  | Sjp_0038990.1 | NA                        | NA       |
| EBR10kb_306 | "6,3"  | NA       | NA       | SJC_S000290 | 142187 | 181526 | NA | Sjp_0038990.1 | NA                        | NA       |
| EBR10kb_306 | "6,3"  | NA       | NA       | SJC_S000290 | 142187 | 181526 | NA | Sjp_0039000.1 | NA                        | NA       |
| HSB10kb_522 | 3      | 24235822 | 24296513 | SJC_S000290 | 181527 | 238647 | +  | Sjp_0039000.1 | NA                        | NA       |
| HSB10kb_522 | 3      | 24235822 | 24296513 | SJC_S000290 | 181527 | 238647 | +  | Sjp_0039020.1 | catalytic activity        | 0.035844 |
| EBR10kb_307 | "3,6"  | NA       | NA       | SJC_S000290 | 238648 | 305942 | NA | Sjp_0039020.1 | catalytic activity        | 0.035844 |
| EBR10kb_307 | "3,6"  | NA       | NA       | SJC_S000290 | 238648 | 305942 | NA | Sjp_0039030.1 | enzyme regulator activity | 0.1755   |
| EBR10kb_307 | "3,6"  | NA       | NA       | SJC_S000290 | 238648 | 305942 | NA | Sjp_0039040.1 | NA                        | NA       |
| EBR10kb_307 | "3,6"  | NA       | NA       | SJC_S000290 | 238648 | 305942 | NA | Sjp_0039050.1 | catalytic activity        | 0.035844 |
| HSB10kb_523 | 6      | 8846399  | 8868323  | SJC_S000290 | 305943 | 331496 | -  | Sjp_0039060.1 | cell part                 | 0.009037 |
| HSB10kb_524 | 7      | 8631510  | 8797935  | SJC_S000291 | 2468   | 296316 | -  | Sjp_0039070.1 | cellular process          | 0.63852  |
| HSB10kb_524 | 7      | 8631510  | 8797935  | SJC_S000291 | 2468   | 296316 | -  | Sjp_0039080.1 | NA                        | NA       |
| HSB10kb_524 | 7      | 8631510  | 8797935  | SJC_S000291 | 2468   | 296316 | -  | Sjp_0039090.1 | NA                        | NA       |
| HSB10kb_524 | 7      | 8631510  | 8797935  | SJC_S000291 | 2468   | 296316 | -  | Sjp_0039100.1 | NA                        | NA       |
| HSB10kb_524 | 7      | 8631510  | 8797935  | SJC_S000291 | 2468   | 296316 | -  | Sjp_0039110.1 | NA                        | NA       |
| HSB10kb_524 | 7      | 8631510  | 8797935  | SJC_S000291 | 2468   | 296316 | -  | Sjp_0039120.1 | NA                        | NA       |
| unknown     | NA     | NA       | NA       | SJC_S000291 | NA     | NA     | NA | Sjp_0039130.1 | NA                        | NA       |
| unknown     | NA     | NA       | NA       | SJC_S000292 | NA     | NA     | NA | Sjp_0039140.1 | catalytic activity        | 0.035844 |
| unknown     | NA     | NA       | NA       | SJC_S000293 | NA     | NA     | NA | Sjp_0039150.1 | NA                        | NA       |
| HSB10kb_525 | WZ     | 39711072 | 39732296 | SJC_S000293 | 98365  | 129854 | -  | Sjp_0039160.1 | NA                        | NA       |
| EBR10kb_308 | "WZ,6" | NA       | NA       | SJC_S000293 | 129855 | 148182 | NA | Sjp_0039160.1 | NA                        | NA       |
| EBR10kb_308 | "WZ,6" | NA       | NA       | SJC_S000293 | 129855 | 148182 | NA | Sjp_0039170.1 | cell part                 | 0.009037 |
| HSB10kb_526 | 6      | 2276096  | 2310779  | SJC_S000293 | 148183 | 183771 | -  | Sjp_0039170.1 | cell part                 | 0.009037 |
| HSB10kb_526 | 6      | 2276096  | 2310779  | SJC_S000293 | 148183 | 183771 | -  | Sjp_0039180.1 | NA                        | NA       |
| unknown     | NA     | NA       | NA       | SJC_S000294 | NA     | NA     | NA | Sjp_0039190.1 | NA                        | NA       |



|             |         |          |          |             |        |        |    |               |                               |          |
|-------------|---------|----------|----------|-------------|--------|--------|----|---------------|-------------------------------|----------|
| unknown     | NA      | NA       | NA       | SJC_S000294 | NA     | NA     | NA | Sjp_0039200.1 | NA                            | NA       |
| HSB10kb_527 | 3       | 15736357 | 15749940 | SJC_S000294 | 48151  | 59975  |    | NA            | NA                            | NA       |
| EBR10kb_309 | "3,3"   | NA       | NA       | SJC_S000294 | 59976  | 69694  | NA | NA            | NA                            | NA       |
| HSB10kb_528 | 3       | 15255239 | 15300072 | SJC_S000294 | 69695  | 106228 | +  | Sjp_0039210.1 | cell part                     | 0.009037 |
| HSB10kb_528 | 3       | 15255239 | 15300072 | SJC_S000294 | 69695  | 106228 | +  | Sjp_0039220.1 | NA                            | NA       |
| EBR10kb_310 | "3,3"   | NA       | NA       | SJC_S000294 | 106229 | 114881 | NA | Sjp_0039220.1 | NA                            | NA       |
| EBR10kb_310 | "3,3"   | NA       | NA       | SJC_S000294 | 106229 | 114881 | NA | Sjp_0039230.1 | molecular transducer activity | 0.50162  |
| HSB10kb_529 | 3       | 15174186 | 15232033 | SJC_S000294 | 114882 | 166643 | -  | Sjp_0039250.1 | NA                            | NA       |
| unknown     | NA      | NA       | NA       | SJC_S000295 | NA     | NA     | NA | Sjp_0039260.1 | NA                            | NA       |
| unknown     | NA      | NA       | NA       | SJC_S000295 | NA     | NA     | NA | Sjp_0039270.1 | biological regulation         | 0.76396  |
| unknown     | NA      | NA       | NA       | SJC_S000295 | NA     | NA     | NA | Sjp_0039280.1 | biological regulation         | 0.76396  |
| unknown     | NA      | NA       | NA       | SJC_S000295 | NA     | NA     | NA | Sjp_0039290.1 | biological regulation         | 0.76396  |
| unknown     | NA      | NA       | NA       | SJC_S000295 | NA     | NA     | NA | Sjp_0039310.1 | NA                            | NA       |
| HSB10kb_530 | WZ      | 31127185 | 31154303 | SJC_S000295 | 143968 | 156411 | -  | Sjp_0039320.1 | NA                            | NA       |
| HSB10kb_530 | WZ      | 31127185 | 31154303 | SJC_S000295 | 143968 | 156411 | -  | Sjp_0039330.1 | NA                            | NA       |
| EBR10kb_311 | "WZ,WZ" | NA       | NA       | SJC_S000295 | 156412 | 166596 | NA | Sjp_0039340.1 | transporter activity          | 0.782    |
| HSB10kb_531 | WZ      | 30979595 | 30993382 | SJC_S000295 | 166597 | 180377 | +  | Sjp_0039340.1 | transporter activity          | 0.782    |
| unknown     | NA      | NA       | NA       | SJC_S000295 | NA     | NA     | NA | Sjp_0039350.1 | NA                            | NA       |
| unknown     | NA      | NA       | NA       | SJC_S000296 | NA     | NA     | NA | Sjp_0039370.1 | enzyme regulator activity     | 0.1755   |
| HSB10kb_532 | 3       | 20348929 | 20659451 | SJC_S000297 | 56104  | 372120 | +  | Sjp_0039380.1 | NA                            | NA       |
| HSB10kb_532 | 3       | 20348929 | 20659451 | SJC_S000297 | 56104  | 372120 | +  | Sjp_0039390.1 | NA                            | NA       |
| HSB10kb_532 | 3       | 20348929 | 20659451 | SJC_S000297 | 56104  | 372120 | +  | Sjp_0039410.1 | NA                            | NA       |
| HSB10kb_532 | 3       | 20348929 | 20659451 | SJC_S000297 | 56104  | 372120 | +  | Sjp_0039420.1 | NA                            | NA       |
| HSB10kb_532 | 3       | 20348929 | 20659451 | SJC_S000297 | 56104  | 372120 | +  | Sjp_0039430.1 | metabolic process             | 0.41934  |
| HSB10kb_532 | 3       | 20348929 | 20659451 | SJC_S000297 | 56104  | 372120 | +  | Sjp_0039440.1 | catalytic activity            | 0.035844 |

|             |    |          |          |             |        |        |    |               |                               |          |
|-------------|----|----------|----------|-------------|--------|--------|----|---------------|-------------------------------|----------|
| HSB10kb_532 | 3  | 20348929 | 20659451 | SJC_S000297 | 56104  | 372120 | +  | Sjp_0039450.1 | NA                            | NA       |
| HSB10kb_532 | 3  | 20348929 | 20659451 | SJC_S000297 | 56104  | 372120 | +  | Sjp_0039460.1 | NA                            | NA       |
| unknown     | NA | NA       | NA       | SJC_S000297 | NA     | NA     | NA | Sjp_0039470.1 | NA                            | NA       |
| unknown     | NA | NA       | NA       | SJC_S000298 | NA     | NA     | NA | Sjp_0039480.1 | NA                            | NA       |
| unknown     | NA | NA       | NA       | SJC_S000298 | NA     | NA     | NA | Sjp_0039490.1 | NA                            | NA       |
| unknown     | NA | NA       | NA       | SJC_S000298 | NA     | NA     | NA | Sjp_0039500.1 | NA                            | NA       |
| unknown     | NA | NA       | NA       | SJC_S000298 | NA     | NA     | NA | Sjp_0039510.1 | transporter activity          | 0.782    |
| unknown     | NA | NA       | NA       | SJC_S000298 | NA     | NA     | NA | Sjp_0039520.1 | transporter activity          | 0.782    |
| unknown     | NA | NA       | NA       | SJC_S000298 | NA     | NA     | NA | Sjp_0039530.1 | NA                            | NA       |
| unknown     | NA | NA       | NA       | SJC_S000298 | NA     | NA     | NA | Sjp_0039540.1 | NA                            | NA       |
| unknown     | NA | NA       | NA       | SJC_S000298 | NA     | NA     | NA | Sjp_0039550.1 | transporter activity          | 0.782    |
| unknown     | NA | NA       | NA       | SJC_S000298 | NA     | NA     | NA | Sjp_0039560.1 | NA                            | NA       |
| unknown     | NA | NA       | NA       | SJC_S000298 | NA     | NA     | NA | Sjp_0039570.1 | NA                            | NA       |
| unknown     | NA | NA       | NA       | SJC_S000299 | NA     | NA     | NA | Sjp_0039580.1 | molecular transducer activity | 0.50162  |
| unknown     | NA | NA       | NA       | SJC_S000299 | NA     | NA     | NA | Sjp_0039590.1 | binding                       | 0.052762 |
| unknown     | NA | NA       | NA       | SJC_S000299 | NA     | NA     | NA | Sjp_0039600.1 | binding                       | 0.052762 |
| unknown     | NA | NA       | NA       | SJC_S000299 | NA     | NA     | NA | Sjp_0039610.1 | binding                       | 0.052762 |
| unknown     | NA | NA       | NA       | SJC_S000299 | NA     | NA     | NA | Sjp_0039620.1 | binding                       | 0.052762 |
| HSB10kb_533 | 4  | 13716703 | 13756971 | SJC_S000299 | 100231 | 144065 | +  | Sjp_0039630.1 | cell part                     | 0.009037 |
| HSB10kb_533 | 4  | 13716703 | 13756971 | SJC_S000299 | 100231 | 144065 | +  | Sjp_0039640.1 | NA                            | NA       |
| unknown     | NA | NA       | NA       | SJC_S000300 | NA     | NA     | NA | Sjp_0039650.1 | NA                            | NA       |
| unknown     | NA | NA       | NA       | SJC_S000300 | NA     | NA     | NA | Sjp_0039660.1 | NA                            | NA       |
| unknown     | NA | NA       | NA       | SJC_S000300 | NA     | NA     | NA | Sjp_0039670.1 | NA                            | NA       |
| unknown     | NA | NA       | NA       | SJC_S000300 | NA     | NA     | NA | Sjp_0039680.1 | catalytic activity            | 0.035844 |
| unknown     | NA | NA       | NA       | SJC_S000300 | NA     | NA     | NA | Sjp_0039690.1 | NA                            | NA       |
| unknown     | NA | NA       | NA       | SJC_S000300 | NA     | NA     | NA | Sjp_0039700.1 | binding                       | 0.052762 |
| unknown     | NA | NA       | NA       | SJC_S000300 | NA     | NA     | NA | Sjp_0039710.1 | NA                            | NA       |
| unknown     | NA | NA       | NA       | SJC_S000301 | NA     | NA     | NA | Sjp_0039730.1 | NA                            | NA       |
| HSB10kb_534 | 1  | 54670098 | 54847485 | SJC_S000302 | 5300   | 154289 | +  | Sjp_0039740.1 | cell part                     | 0.009037 |

|             |       |          |          |             |        |        |    |               |                       |          |
|-------------|-------|----------|----------|-------------|--------|--------|----|---------------|-----------------------|----------|
| HSB10kb_534 | 1     | 54670098 | 54847485 | SJC_S000302 | 5300   | 154289 | +  | Sjp_0039750.1 | NA                    | NA       |
| HSB10kb_534 | 1     | 54670098 | 54847485 | SJC_S000302 | 5300   | 154289 | +  | Sjp_0039760.1 | cell part             | 0.009037 |
| HSB10kb_534 | 1     | 54670098 | 54847485 | SJC_S000302 | 5300   | 154289 | +  | Sjp_0039770.1 | NA                    | NA       |
| unknown     | NA    | NA       | NA       | SJC_S000303 | NA     | NA     | NA | Sjp_0039780.1 | NA                    | NA       |
| unknown     | NA    | NA       | NA       | SJC_S000303 | NA     | NA     | NA | Sjp_0039790.1 | NA                    | NA       |
| unknown     | NA    | NA       | NA       | SJC_S000303 | NA     | NA     | NA | Sjp_0039800.1 | NA                    | NA       |
| HSB10kb_535 | 2     | 28049820 | 28393199 | SJC_S000304 | 3172   | 316774 | +  | Sjp_0039810.1 | NA                    | NA       |
| HSB10kb_535 | 2     | 28049820 | 28393199 | SJC_S000304 | 3172   | 316774 | +  | Sjp_0039820.1 | binding               | 0.052762 |
| HSB10kb_535 | 2     | 28049820 | 28393199 | SJC_S000304 | 3172   | 316774 | +  | Sjp_0039830.1 | NA                    | NA       |
| HSB10kb_535 | 2     | 28049820 | 28393199 | SJC_S000304 | 3172   | 316774 | +  | Sjp_0039840.1 | NA                    | NA       |
| HSB10kb_535 | 2     | 28049820 | 28393199 | SJC_S000304 | 3172   | 316774 | +  | Sjp_0039850.1 | NA                    | NA       |
| HSB10kb_535 | 2     | 28049820 | 28393199 | SJC_S000304 | 3172   | 316774 | +  | Sjp_0039860.1 | NA                    | NA       |
| HSB10kb_535 | 2     | 28049820 | 28393199 | SJC_S000304 | 3172   | 316774 | +  | Sjp_0039870.1 | catalytic activity    | 0.035844 |
| HSB10kb_535 | 2     | 28049820 | 28393199 | SJC_S000304 | 3172   | 316774 | +  | Sjp_0039880.1 | binding               | 0.052762 |
| HSB10kb_535 | 2     | 28049820 | 28393199 | SJC_S000304 | 3172   | 316774 | +  | Sjp_0039890.1 | NA                    | NA       |
| unknown     | NA    | NA       | NA       | SJC_S000304 | NA     | NA     | NA | Sjp_0039900.1 | NA                    | NA       |
| unknown     | NA    | NA       | NA       | SJC_S000304 | NA     | NA     | NA | Sjp_0039910.1 | NA                    | NA       |
| unknown     | NA    | NA       | NA       | SJC_S000305 | NA     | NA     | NA | Sjp_0039920.1 | binding               | 0.052762 |
| unknown     | NA    | NA       | NA       | SJC_S000305 | NA     | NA     | NA | Sjp_0039930.1 | binding               | 0.052762 |
| HSB10kb_536 | 4     | 6634569  | 6742713  | SJC_S000305 | 61620  | 156472 | -  | Sjp_0039940.1 | NA                    | NA       |
| HSB10kb_536 | 4     | 6634569  | 6742713  | SJC_S000305 | 61620  | 156472 | -  | Sjp_0039950.1 | cell part             | 0.009037 |
| HSB10kb_536 | 4     | 6634569  | 6742713  | SJC_S000305 | 61620  | 156472 | -  | Sjp_0039960.1 | NA                    | NA       |
| HSB10kb_536 | 4     | 6634569  | 6742713  | SJC_S000305 | 61620  | 156472 | -  | Sjp_0039970.1 | cell part             | 0.009037 |
| HSB10kb_537 | 1     | 47180339 | 47207998 | SJC_S000306 | 22179  | 41704  | -  | Sjp_0039980.1 | biological regulation | 0.76396  |
| EBR10kb_312 | "1,1" | NA       | NA       | SJC_S000306 | 41705  | 57840  | NA | Sjp_0039980.1 | biological regulation | 0.76396  |
| HSB10kb_538 | 1     | 40843193 | 40876123 | SJC_S000306 | 57841  | 90867  | -  | Sjp_0039980.1 | biological regulation | 0.76396  |
| EBR10kb_313 | "1,1" | NA       | NA       | SJC_S000306 | 90868  | 110632 | NA | Sjp_0039980.1 | biological regulation | 0.76396  |
| EBR10kb_313 | "1,1" | NA       | NA       | SJC_S000306 | 90868  | 110632 | NA | Sjp_0039990.1 | NA                    | NA       |
| HSB10kb_539 | 1     | 47077808 | 47117741 | SJC_S000306 | 110633 | 128728 | -  | Sjp_0039990.1 | NA                    | NA       |
| HSB10kb_539 | 1     | 47077808 | 47117741 | SJC_S000306 | 110633 | 128728 | -  | Sjp_0040000.1 | response to           | NA       |

|             |       |          |          |             |        |        |    |               |                                               |         |
|-------------|-------|----------|----------|-------------|--------|--------|----|---------------|-----------------------------------------------|---------|
|             |       |          |          |             |        |        |    |               | stimulus                                      |         |
| HSB10kb_539 | 1     | 47077808 | 47117741 | SJC_S000306 | 110633 | 128728 | -  | Sjp_0040010.1 | NA                                            | NA      |
| HSB10kb_540 | 4     | 8998081  | 9084254  | SJC_S000307 | 2936   | 116194 | -  | Sjp_0040020.1 | NA                                            | NA      |
| HSB10kb_540 | 4     | 8998081  | 9084254  | SJC_S000307 | 2936   | 116194 | -  | Sjp_0040030.1 | NA                                            | NA      |
| HSB10kb_540 | 4     | 8998081  | 9084254  | SJC_S000307 | 2936   | 116194 | -  | Sjp_0040040.1 | NA                                            | NA      |
| EBR10kb_314 | "4,4" | NA       | NA       | SJC_S000307 | 116195 | 141513 | NA | Sjp_0040050.1 | transporter activity                          | 0.782   |
| EBR10kb_314 | "4,4" | NA       | NA       | SJC_S000307 | 116195 | 141513 | NA | Sjp_0040060.1 | NA                                            | NA      |
| HSB10kb_541 | 4     | 14843470 | 15004365 | SJC_S000307 | 141514 | 279472 | -  | Sjp_0040060.1 | NA                                            | NA      |
| HSB10kb_541 | 4     | 14843470 | 15004365 | SJC_S000307 | 141514 | 279472 | -  | Sjp_0040070.1 | NA                                            | NA      |
| HSB10kb_541 | 4     | 14843470 | 15004365 | SJC_S000307 | 141514 | 279472 | -  | Sjp_0040080.1 | NA                                            | NA      |
| HSB10kb_541 | 4     | 14843470 | 15004365 | SJC_S000307 | 141514 | 279472 | -  | Sjp_0040090.1 | NA                                            | NA      |
| HSB10kb_541 | 4     | 14843470 | 15004365 | SJC_S000307 | 141514 | 279472 | -  | Sjp_0040100.1 | biological regulation                         | 0.76396 |
| HSB10kb_541 | 4     | 14843470 | 15004365 | SJC_S000307 | 141514 | 279472 | -  | Sjp_0040110.1 | biological regulation                         | 0.76396 |
| HSB10kb_541 | 4     | 14843470 | 15004365 | SJC_S000307 | 141514 | 279472 | -  | Sjp_0040120.1 | NA                                            | NA      |
| EBR10kb_315 | "4,1" | NA       | NA       | SJC_S000307 | 279473 | 281241 | NA | Sjp_0040120.1 | NA                                            | NA      |
| HSB10kb_542 | 1     | 39399425 | 39418077 | SJC_S000307 | 281242 | 305424 | +  | Sjp_0040120.1 | NA                                            | NA      |
| HSB10kb_542 | 1     | 39399425 | 39418077 | SJC_S000307 | 281242 | 305424 | +  | Sjp_0040130.1 | cellular component organization or biogenesis | NA      |
| EBR10kb_316 | "1,1" | NA       | NA       | SJC_S000307 | 305425 | 312238 | NA | NA            | NA                                            | NA      |
| HSB10kb_543 | 1     | 39426359 | 39476130 | SJC_S000307 | 312239 | 340163 | -  | Sjp_0040140.1 | NA                                            | NA      |
| HSB10kb_543 | 1     | 39426359 | 39476130 | SJC_S000307 | 312239 | 340163 | -  | Sjp_0040150.1 | NA                                            | NA      |
| HSB10kb_543 | 1     | 39426359 | 39476130 | SJC_S000307 | 312239 | 340163 | -  | Sjp_0040160.1 | NA                                            | NA      |
| unknown     | NA    | NA       | NA       | SJC_S000307 | NA     | NA     | NA | Sjp_0040170.1 | NA                                            | NA      |
| HSB10kb_544 | 3     | 5449903  | 5777746  | SJC_S000308 | 31807  | 324675 | -  | Sjp_0040180.1 | NA                                            | NA      |
| HSB10kb_544 | 3     | 5449903  | 5777746  | SJC_S000308 | 31807  | 324675 | -  | Sjp_0040190.1 | cellular process                              | 0.63852 |
| HSB10kb_544 | 3     | 5449903  | 5777746  | SJC_S000308 | 31807  | 324675 | -  | Sjp_0040200.1 | NA                                            | NA      |
| HSB10kb_544 | 3     | 5449903  | 5777746  | SJC_S000308 | 31807  | 324675 | -  | Sjp_0040210.1 | NA                                            | NA      |
| HSB10kb_544 | 3     | 5449903  | 5777746  | SJC_S000308 | 31807  | 324675 | -  | Sjp_0040220.1 | NA                                            | NA      |
| HSB10kb_544 | 3     | 5449903  | 5777746  | SJC_S000308 | 31807  | 324675 | -  | Sjp_0040230.1 | NA                                            | NA      |

|             |       |          |          |             |        |        |    |               |                           |          |
|-------------|-------|----------|----------|-------------|--------|--------|----|---------------|---------------------------|----------|
| HSB10kb_544 | 3     | 5449903  | 5777746  | SJC_S000308 | 31807  | 324675 | -  | Sjp_0040240.1 | enzyme regulator activity | 0.1755   |
| HSB10kb_544 | 3     | 5449903  | 5777746  | SJC_S000308 | 31807  | 324675 | -  | Sjp_0040250.1 | NA                        | NA       |
| HSB10kb_544 | 3     | 5449903  | 5777746  | SJC_S000308 | 31807  | 324675 | -  | Sjp_0040260.1 | NA                        | NA       |
| HSB10kb_544 | 3     | 5449903  | 5777746  | SJC_S000308 | 31807  | 324675 | -  | Sjp_0040270.1 | NA                        | NA       |
| HSB10kb_544 | 3     | 5449903  | 5777746  | SJC_S000308 | 31807  | 324675 | -  | Sjp_0040280.1 | electron carrier activity | NA       |
| unknown     | NA    | NA       | NA       | SJC_S000308 | NA     | NA     | NA | Sjp_0040290.1 | catalytic activity        | 0.035844 |
| unknown     | NA    | NA       | NA       | SJC_S000310 | NA     | NA     | NA | Sjp_0040300.1 | NA                        | NA       |
| unknown     | NA    | NA       | NA       | SJC_S000311 | NA     | NA     | NA | Sjp_0040320.1 | NA                        | NA       |
| unknown     | NA    | NA       | NA       | SJC_S000311 | NA     | NA     | NA | Sjp_0040330.1 | NA                        | NA       |
| unknown     | NA    | NA       | NA       | SJC_S000311 | NA     | NA     | NA | Sjp_0040340.1 | NA                        | NA       |
| unknown     | NA    | NA       | NA       | SJC_S000312 | NA     | NA     | NA | Sjp_0040350.1 | NA                        | NA       |
| HSB10kb_545 | 2     | 2762663  | 2919052  | SJC_S000312 | 34056  | 190932 | -  | Sjp_0040360.1 | NA                        | NA       |
| HSB10kb_545 | 2     | 2762663  | 2919052  | SJC_S000312 | 34056  | 190932 | -  | Sjp_0040370.1 | NA                        | NA       |
| HSB10kb_545 | 2     | 2762663  | 2919052  | SJC_S000312 | 34056  | 190932 | -  | Sjp_0040380.1 | NA                        | NA       |
| HSB10kb_545 | 2     | 2762663  | 2919052  | SJC_S000312 | 34056  | 190932 | -  | Sjp_0040390.1 | NA                        | NA       |
| HSB10kb_545 | 2     | 2762663  | 2919052  | SJC_S000312 | 34056  | 190932 | -  | Sjp_0040400.1 | NA                        | NA       |
| HSB10kb_545 | 2     | 2762663  | 2919052  | SJC_S000312 | 34056  | 190932 | -  | Sjp_0040410.1 | NA                        | NA       |
| EBR10kb_317 | "2,2" | NA       | NA       | SJC_S000312 | 190933 | 195795 | NA | Sjp_0040420.1 | metabolic process         | 0.41934  |
| HSB10kb_546 | 2     | 11603822 | 11743914 | SJC_S000312 | 195796 | 327160 | -  | Sjp_0040420.1 | metabolic process         | 0.41934  |
| HSB10kb_546 | 2     | 11603822 | 11743914 | SJC_S000312 | 195796 | 327160 | -  | Sjp_0040430.1 | developmental process     | NA       |
| HSB10kb_546 | 2     | 11603822 | 11743914 | SJC_S000312 | 195796 | 327160 | -  | Sjp_0040440.1 | NA                        | NA       |
| HSB10kb_546 | 2     | 11603822 | 11743914 | SJC_S000312 | 195796 | 327160 | -  | Sjp_0040450.1 | NA                        | NA       |
| unknown     | NA    | NA       | NA       | SJC_S000313 | NA     | NA     | NA | Sjp_0040460.1 | NA                        | NA       |
| unknown     | NA    | NA       | NA       | SJC_S000313 | NA     | NA     | NA | Sjp_0040470.1 | NA                        | NA       |
| HSB10kb_547 | 1     | 6130074  | 6179060  | SJC_S000313 | 58095  | 91540  | -  | Sjp_0040480.1 | biological regulation     | 0.76396  |
| EBR10kb_318 | "1,1" | NA       | NA       | SJC_S000313 | 91541  | 180374 | NA | Sjp_0040490.1 | NA                        | NA       |
| HSB10kb_548 | 1     | 3463350  | 3633151  | SJC_S000313 | 180375 | 316959 | -  | Sjp_0040500.1 | NA                        | NA       |

|             |       |          |          |             |        |        |    |               |                       |          |
|-------------|-------|----------|----------|-------------|--------|--------|----|---------------|-----------------------|----------|
| HSB10kb_548 | 1     | 3463350  | 3633151  | SJC_S000313 | 180375 | 316959 | -  | Sjp_0040510.1 | NA                    | NA       |
| HSB10kb_548 | 1     | 3463350  | 3633151  | SJC_S000313 | 180375 | 316959 | -  | Sjp_0040520.1 | NA                    | NA       |
| EBR10kb_319 | "1,1" | NA       | NA       | SJC_S000313 | 316960 | 339579 | NA | Sjp_0040530.1 | NA                    | NA       |
| HSB10kb_549 | 1     | 6041219  | 6062467  | SJC_S000313 | 339580 | 362777 | +  | Sjp_0040530.1 | NA                    | NA       |
| HSB10kb_549 | 1     | 6041219  | 6062467  | SJC_S000313 | 339580 | 362777 | +  | Sjp_0040540.1 | NA                    | NA       |
| HSB10kb_549 | 1     | 6041219  | 6062467  | SJC_S000313 | 339580 | 362777 | +  | Sjp_0040550.1 | NA                    | NA       |
| unknown     | NA    | NA       | NA       | SJC_S000314 | NA     | NA     | NA | Sjp_0040560.1 | NA                    | NA       |
| HSB10kb_550 | 1     | 13984233 | 14068670 | SJC_S000314 | 23914  | 84244  | -  | Sjp_0040570.1 | NA                    | NA       |
| HSB10kb_550 | 1     | 13984233 | 14068670 | SJC_S000314 | 23914  | 84244  | -  | Sjp_0040580.1 | NA                    | NA       |
| EBR10kb_320 | "1,1" | NA       | NA       | SJC_S000314 | 84245  | 131372 | NA | Sjp_0040590.1 | cell part             | 0.009037 |
| HSB10kb_551 | 1     | 9850712  | 9907981  | SJC_S000314 | 131373 | 198479 | +  | Sjp_0040590.1 | cell part             | 0.009037 |
| HSB10kb_551 | 1     | 9850712  | 9907981  | SJC_S000314 | 131373 | 198479 | +  | Sjp_0040600.1 | NA                    | NA       |
| EBR10kb_321 | "1,1" | NA       | NA       | SJC_S000314 | 198480 | 249879 | NA | Sjp_0040600.1 | NA                    | NA       |
| EBR10kb_321 | "1,1" | NA       | NA       | SJC_S000314 | 198480 | 249879 | NA | Sjp_0040610.1 | NA                    | NA       |
| EBR10kb_321 | "1,1" | NA       | NA       | SJC_S000314 | 198480 | 249879 | NA | Sjp_0040620.1 | NA                    | NA       |
| EBR10kb_321 | "1,1" | NA       | NA       | SJC_S000314 | 198480 | 249879 | NA | Sjp_0040630.1 | catalytic activity    | 0.035844 |
| EBR10kb_321 | "1,1" | NA       | NA       | SJC_S000314 | 198480 | 249879 | NA | Sjp_0040640.1 | NA                    | NA       |
| HSB10kb_552 | 1     | 9950838  | 9985416  | SJC_S000314 | 249880 | 287493 | -  | Sjp_0040640.1 | NA                    | NA       |
| unknown     | NA    | NA       | NA       | SJC_S000315 | NA     | NA     | NA | Sjp_0040650.1 | NA                    | NA       |
| HSB10kb_553 | 1     | 26824527 | 26856937 | SJC_S000315 | 54418  | 101455 | +  | Sjp_0040660.1 | NA                    | NA       |
| HSB10kb_553 | 1     | 26824527 | 26856937 | SJC_S000315 | 54418  | 101455 | +  | Sjp_0040670.1 | NA                    | NA       |
| EBR10kb_322 | "1,1" | NA       | NA       | SJC_S000315 | 101456 | 123485 | NA | Sjp_0040670.1 | NA                    | NA       |
| HSB10kb_554 | 1     | 26883016 | 26898332 | SJC_S000315 | 123486 | 198583 | -  | Sjp_0040670.1 | NA                    | NA       |
| HSB10kb_554 | 1     | 26883016 | 26898332 | SJC_S000315 | 123486 | 198583 | -  | Sjp_0040680.1 | NA                    | NA       |
| HSB10kb_554 | 1     | 26883016 | 26898332 | SJC_S000315 | 123486 | 198583 | -  | Sjp_0040690.1 | NA                    | NA       |
| HSB10kb_554 | 1     | 26883016 | 26898332 | SJC_S000315 | 123486 | 198583 | -  | Sjp_0040700.1 | NA                    | NA       |
| HSB10kb_554 | 1     | 26883016 | 26898332 | SJC_S000315 | 123486 | 198583 | -  | Sjp_0040710.1 | biological regulation | 0.76396  |
| EBR10kb_323 | "1,1" | NA       | NA       | SJC_S000315 | 198584 | 214730 | NA | Sjp_0040710.1 | biological regulation | 0.76396  |
| HSB10kb_555 | 1     | 26933479 | 27151145 | SJC_S000315 | 214731 | 429665 | +  | Sjp_0040710.1 | biological regulation | 0.76396  |
| HSB10kb_555 | 1     | 26933479 | 27151145 | SJC_S000315 | 214731 | 429665 | +  | Sjp_0040720.1 | binding               | 0.052762 |
| HSB10kb_555 | 1     | 26933479 | 27151145 | SJC_S000315 | 214731 | 429665 | +  | Sjp_0040730.1 | NA                    | NA       |

|             |       |          |          |             |        |        |    |               |                               |          |
|-------------|-------|----------|----------|-------------|--------|--------|----|---------------|-------------------------------|----------|
| HSB10kb_555 | 1     | 26933479 | 27151145 | SJC_S000315 | 214731 | 429665 | +  | Sjp_0040740.1 | NA                            | NA       |
| HSB10kb_555 | 1     | 26933479 | 27151145 | SJC_S000315 | 214731 | 429665 | +  | Sjp_0040750.1 | NA                            | NA       |
| HSB10kb_555 | 1     | 26933479 | 27151145 | SJC_S000315 | 214731 | 429665 | +  | Sjp_0040760.1 | binding                       | 0.052762 |
| HSB10kb_555 | 1     | 26933479 | 27151145 | SJC_S000315 | 214731 | 429665 | +  | Sjp_0040770.1 | NA                            | NA       |
| HSB10kb_555 | 1     | 26933479 | 27151145 | SJC_S000315 | 214731 | 429665 | +  | Sjp_0040780.1 | binding                       | 0.052762 |
| HSB10kb_556 | 1     | 38575500 | 38729130 | SJC_S000316 | 15134  | 191064 | -  | Sjp_0040800.1 | NA                            | NA       |
| HSB10kb_556 | 1     | 38575500 | 38729130 | SJC_S000316 | 15134  | 191064 | -  | Sjp_0040810.1 | NA                            | NA       |
| HSB10kb_556 | 1     | 38575500 | 38729130 | SJC_S000316 | 15134  | 191064 | -  | Sjp_0040820.1 | NA                            | NA       |
| HSB10kb_556 | 1     | 38575500 | 38729130 | SJC_S000316 | 15134  | 191064 | -  | Sjp_0040830.1 | transporter activity          | 0.782    |
| HSB10kb_556 | 1     | 38575500 | 38729130 | SJC_S000316 | 15134  | 191064 | -  | Sjp_0040840.1 | NA                            | NA       |
| HSB10kb_556 | 1     | 38575500 | 38729130 | SJC_S000316 | 15134  | 191064 | -  | Sjp_0040850.1 | NA                            | NA       |
| HSB10kb_556 | 1     | 38575500 | 38729130 | SJC_S000316 | 15134  | 191064 | -  | Sjp_0040860.1 | cell part                     | 0.009037 |
| HSB10kb_556 | 1     | 38575500 | 38729130 | SJC_S000316 | 15134  | 191064 | -  | Sjp_0040870.1 | biological regulation         | 0.76396  |
| unknown     | NA    | NA       | NA       | SJC_S000316 | NA     | NA     | NA | Sjp_0040880.1 | NA                            | NA       |
| HSB10kb_557 | 4     | 12444726 | 12658154 | SJC_S000317 | 2505   | 295470 | +  | Sjp_0040890.1 | NA                            | NA       |
| HSB10kb_557 | 4     | 12444726 | 12658154 | SJC_S000317 | 2505   | 295470 | +  | Sjp_0040900.1 | NA                            | NA       |
| HSB10kb_557 | 4     | 12444726 | 12658154 | SJC_S000317 | 2505   | 295470 | +  | Sjp_0040910.1 | catalytic activity            | 0.035844 |
| HSB10kb_557 | 4     | 12444726 | 12658154 | SJC_S000317 | 2505   | 295470 | +  | Sjp_0040920.1 | NA                            | NA       |
| HSB10kb_557 | 4     | 12444726 | 12658154 | SJC_S000317 | 2505   | 295470 | +  | Sjp_0040930.1 | molecular transducer activity | 0.50162  |
| HSB10kb_557 | 4     | 12444726 | 12658154 | SJC_S000317 | 2505   | 295470 | +  | Sjp_0040940.1 | NA                            | NA       |
| HSB10kb_557 | 4     | 12444726 | 12658154 | SJC_S000317 | 2505   | 295470 | +  | Sjp_0040950.1 | macromolecular complex        | NA       |
| HSB10kb_557 | 4     | 12444726 | 12658154 | SJC_S000317 | 2505   | 295470 | +  | Sjp_0040960.1 | NA                            | NA       |
| unknown     | NA    | NA       | NA       | SJC_S000317 | NA     | NA     | NA | Sjp_0040970.1 | NA                            | NA       |
| HSB10kb_558 | 7     | 3232466  | 3430473  | SJC_S000318 | 13929  | 195215 | +  | Sjp_0040980.1 | catalytic activity            | 0.035844 |
| HSB10kb_558 | 7     | 3232466  | 3430473  | SJC_S000318 | 13929  | 195215 | +  | Sjp_0040990.1 | NA                            | NA       |
| HSB10kb_558 | 7     | 3232466  | 3430473  | SJC_S000318 | 13929  | 195215 | +  | Sjp_0041000.1 | NA                            | NA       |
| EBR10kb_324 | "7,7" | NA       | NA       | SJC_S000318 | 195216 | 209844 | NA | Sjp_0041010.1 | NA                            | NA       |
| HSB10kb_559 | 7     | 3037099  | 3056462  | SJC_S000318 | 209845 | 227841 | -  | Sjp_0041010.1 | NA                            | NA       |
| HSB10kb_559 | 7     | 3037099  | 3056462  | SJC_S000318 | 209845 | 227841 | -  | Sjp_0041020.1 | catalytic activity            | 0.035844 |

|             |    |          |          |             |       |        |    |               |                                               |          |
|-------------|----|----------|----------|-------------|-------|--------|----|---------------|-----------------------------------------------|----------|
| unknown     | NA | NA       | NA       | SJC_S000319 | NA    | NA     | NA | Sjp_0041030.1 | NA                                            | NA       |
| unknown     | NA | NA       | NA       | SJC_S000319 | NA    | NA     | NA | Sjp_0041040.1 | NA                                            | NA       |
| unknown     | NA | NA       | NA       | SJC_S000319 | NA    | NA     | NA | Sjp_0041050.1 | NA                                            | NA       |
| unknown     | NA | NA       | NA       | SJC_S000319 | NA    | NA     | NA | Sjp_0041060.1 | NA                                            | NA       |
| unknown     | NA | NA       | NA       | SJC_S000319 | NA    | NA     | NA | Sjp_0041070.1 | binding                                       | 0.052762 |
| unknown     | NA | NA       | NA       | SJC_S000319 | NA    | NA     | NA | Sjp_0041080.1 | NA                                            | NA       |
| unknown     | NA | NA       | NA       | SJC_S000319 | NA    | NA     | NA | Sjp_0041090.1 | biological regulation                         | 0.76396  |
| unknown     | NA | NA       | NA       | SJC_S000320 | NA    | NA     | NA | Sjp_0041100.1 | NA                                            | NA       |
| unknown     | NA | NA       | NA       | SJC_S000320 | NA    | NA     | NA | Sjp_0041110.1 | NA                                            | NA       |
| unknown     | NA | NA       | NA       | SJC_S000320 | NA    | NA     | NA | Sjp_0041120.1 | catalytic activity                            | 0.035844 |
| HSB10kb_560 | WZ | 36758228 | 36844905 | SJC_S000321 | 30399 | 90304  | -  | Sjp_0041130.1 | cellular component organization or biogenesis | NA       |
| HSB10kb_560 | WZ | 36758228 | 36844905 | SJC_S000321 | 30399 | 90304  | -  | Sjp_0041140.1 | NA                                            | NA       |
| unknown     | NA | NA       | NA       | SJC_S000321 | NA    | NA     | NA | Sjp_0041150.1 | binding                                       | 0.052762 |
| unknown     | NA | NA       | NA       | SJC_S000322 | NA    | NA     | NA | Sjp_0041160.1 | NA                                            | NA       |
| unknown     | NA | NA       | NA       | SJC_S000322 | NA    | NA     | NA | Sjp_0041170.1 | NA                                            | NA       |
| unknown     | NA | NA       | NA       | SJC_S000322 | NA    | NA     | NA | Sjp_0041180.1 | biological regulation                         | 0.76396  |
| unknown     | NA | NA       | NA       | SJC_S000323 | NA    | NA     | NA | Sjp_0041190.1 | catalytic activity                            | 0.035844 |
| unknown     | NA | NA       | NA       | SJC_S000323 | NA    | NA     | NA | Sjp_0041210.1 | cell part                                     | 0.009037 |
| unknown     | NA | NA       | NA       | SJC_S000323 | NA    | NA     | NA | Sjp_0041220.1 | NA                                            | NA       |
| unknown     | NA | NA       | NA       | SJC_S000325 | NA    | NA     | NA | Sjp_0041230.1 | multi-organism process                        | NA       |
| HSB10kb_561 | 1  | 51432894 | 52016378 | SJC_S000325 | 70854 | 596757 | +  | Sjp_0041240.1 | binding                                       | 0.052762 |
| HSB10kb_561 | 1  | 51432894 | 52016378 | SJC_S000325 | 70854 | 596757 | +  | Sjp_0041250.1 | NA                                            | NA       |
| HSB10kb_561 | 1  | 51432894 | 52016378 | SJC_S000325 | 70854 | 596757 | +  | Sjp_0041260.1 | NA                                            | NA       |
| HSB10kb_561 | 1  | 51432894 | 52016378 | SJC_S000325 | 70854 | 596757 | +  | Sjp_0041270.1 | biological regulation                         | 0.76396  |
| HSB10kb_561 | 1  | 51432894 | 52016378 | SJC_S000325 | 70854 | 596757 | +  | Sjp_0041280.1 | NA                                            | NA       |
| HSB10kb_561 | 1  | 51432894 | 52016378 | SJC_S000325 | 70854 | 596757 | +  | Sjp_0041290.1 | NA                                            | NA       |
| HSB10kb_561 | 1  | 51432894 | 52016378 | SJC_S000325 | 70854 | 596757 | +  | Sjp_0041300.1 | NA                                            | NA       |



|             |       |          |          |             |        |        |    |               |                        |          |
|-------------|-------|----------|----------|-------------|--------|--------|----|---------------|------------------------|----------|
| HSB10kb_561 | 1     | 51432894 | 52016378 | SJC_S000325 | 70854  | 596757 | +  | Sjp_0041310.1 | NA                     | NA       |
| HSB10kb_561 | 1     | 51432894 | 52016378 | SJC_S000325 | 70854  | 596757 | +  | Sjp_0041320.1 | NA                     | NA       |
| HSB10kb_561 | 1     | 51432894 | 52016378 | SJC_S000325 | 70854  | 596757 | +  | Sjp_0041330.1 | NA                     | NA       |
| HSB10kb_561 | 1     | 51432894 | 52016378 | SJC_S000325 | 70854  | 596757 | +  | Sjp_0041340.1 | biological regulation  | 0.76396  |
| HSB10kb_561 | 1     | 51432894 | 52016378 | SJC_S000325 | 70854  | 596757 | +  | Sjp_0041350.1 | NA                     | NA       |
| HSB10kb_561 | 1     | 51432894 | 52016378 | SJC_S000325 | 70854  | 596757 | +  | Sjp_0041360.1 | NA                     | NA       |
| HSB10kb_561 | 1     | 51432894 | 52016378 | SJC_S000325 | 70854  | 596757 | +  | Sjp_0041370.1 | NA                     | NA       |
| HSB10kb_561 | 1     | 51432894 | 52016378 | SJC_S000325 | 70854  | 596757 | +  | Sjp_0041380.1 | catalytic activity     | 0.035844 |
| HSB10kb_561 | 1     | 51432894 | 52016378 | SJC_S000325 | 70854  | 596757 | +  | Sjp_0041390.1 | catalytic activity     | 0.035844 |
| HSB10kb_561 | 1     | 51432894 | 52016378 | SJC_S000325 | 70854  | 596757 | +  | Sjp_0041400.1 | biological regulation  | 0.76396  |
| EBR10kb_325 | "1,1" | NA       | NA       | SJC_S000325 | 596758 | 612577 | NA | Sjp_0041400.1 | biological regulation  | 0.76396  |
| HSB10kb_562 | 1     | 52043100 | 52091875 | SJC_S000325 | 612578 | 626449 | -  | Sjp_0041410.1 | NA                     | NA       |
| unknown     | NA    | NA       | NA       | SJC_S000326 | NA     | NA     | NA | Sjp_0041420.1 | NA                     | NA       |
| HSB10kb_563 | 4     | 25460736 | 25590132 | SJC_S000326 | 103844 | 252190 | -  | Sjp_0041430.1 | NA                     | NA       |
| HSB10kb_563 | 4     | 25460736 | 25590132 | SJC_S000326 | 103844 | 252190 | -  | Sjp_0041440.1 | NA                     | NA       |
| HSB10kb_563 | 4     | 25460736 | 25590132 | SJC_S000326 | 103844 | 252190 | -  | Sjp_0041450.1 | NA                     | NA       |
| HSB10kb_563 | 4     | 25460736 | 25590132 | SJC_S000326 | 103844 | 252190 | -  | Sjp_0041460.1 | NA                     | NA       |
| HSB10kb_564 | 3     | 11528730 | 11554301 | SJC_S000327 | 13707  | 32239  | -  | Sjp_0041470.1 | NA                     | NA       |
| EBR10kb_326 | "3,3" | NA       | NA       | SJC_S000327 | 32240  | 160117 | NA | Sjp_0041470.1 | NA                     | NA       |
| HSB10kb_565 | 3     | 11407360 | 11421511 | SJC_S000327 | 160118 | 173340 | -  | NA            | NA                     | NA       |
| EBR10kb_327 | "3,3" | NA       | NA       | SJC_S000327 | 173341 | 175933 | NA | NA            | NA                     | NA       |
| HSB10kb_566 | 3     | 11349272 | 11374157 | SJC_S000327 | 175934 | 241716 | +  | Sjp_0041490.1 | NA                     | NA       |
| HSB10kb_566 | 3     | 11349272 | 11374157 | SJC_S000327 | 175934 | 241716 | +  | Sjp_0041500.1 | binding                | 0.052762 |
| EBR10kb_328 | "3,3" | NA       | NA       | SJC_S000327 | 241717 | 243812 | NA | Sjp_0041500.1 | binding                | 0.052762 |
| HSB10kb_567 | 3     | 11284759 | 11313151 | SJC_S000327 | 243813 | 288361 | -  | Sjp_0041500.1 | binding                | 0.052762 |
| HSB10kb_567 | 3     | 11284759 | 11313151 | SJC_S000327 | 243813 | 288361 | -  | Sjp_0041510.1 | NA                     | NA       |
| HSB10kb_567 | 3     | 11284759 | 11313151 | SJC_S000327 | 243813 | 288361 | -  | Sjp_0041520.1 | NA                     | NA       |
| EBR10kb_329 | "3,3" | NA       | NA       | SJC_S000327 | 288362 | 304464 | NA | Sjp_0041520.1 | NA                     | NA       |
| HSB10kb_568 | 3     | 11171239 | 11283197 | SJC_S000327 | 304465 | 375464 | -  | Sjp_0041520.1 | NA                     | NA       |
| HSB10kb_568 | 3     | 11171239 | 11283197 | SJC_S000327 | 304465 | 375464 | -  | Sjp_0041530.1 | macromolecular complex | NA       |

|             |    |          |          |             |        |        |    |               |                                               |          |
|-------------|----|----------|----------|-------------|--------|--------|----|---------------|-----------------------------------------------|----------|
| HSB10kb_568 | 3  | 11171239 | 11283197 | SJC_S000327 | 304465 | 375464 | -  | Sjp_0041540.1 | NA                                            | NA       |
| HSB10kb_568 | 3  | 11171239 | 11283197 | SJC_S000327 | 304465 | 375464 | -  | Sjp_0041550.1 | NA                                            | NA       |
| unknown     | NA | NA       | NA       | SJC_S000328 | NA     | NA     | NA | Sjp_0041560.1 | NA                                            | NA       |
| unknown     | NA | NA       | NA       | SJC_S000328 | NA     | NA     | NA | Sjp_0041570.1 | catalytic activity                            | 0.035844 |
| unknown     | NA | NA       | NA       | SJC_S000328 | NA     | NA     | NA | Sjp_0041580.1 | NA                                            | NA       |
| unknown     | NA | NA       | NA       | SJC_S000328 | NA     | NA     | NA | Sjp_0041590.1 | NA                                            | NA       |
| unknown     | NA | NA       | NA       | SJC_S000328 | NA     | NA     | NA | Sjp_0041600.1 | biological regulation                         | 0.76396  |
| unknown     | NA | NA       | NA       | SJC_S000328 | NA     | NA     | NA | Sjp_0041610.1 | catalytic activity                            | 0.035844 |
| unknown     | NA | NA       | NA       | SJC_S000328 | NA     | NA     | NA | Sjp_0041620.1 | NA                                            | NA       |
| unknown     | NA | NA       | NA       | SJC_S000328 | NA     | NA     | NA | Sjp_0041630.1 | NA                                            | NA       |
| unknown     | NA | NA       | NA       | SJC_S000328 | NA     | NA     | NA | Sjp_0041640.1 | binding                                       | 0.052762 |
| unknown     | NA | NA       | NA       | SJC_S000328 | NA     | NA     | NA | Sjp_0041650.1 | catalytic activity                            | 0.035844 |
| unknown     | NA | NA       | NA       | SJC_S000328 | NA     | NA     | NA | Sjp_0041660.1 | NA                                            | NA       |
| unknown     | NA | NA       | NA       | SJC_S000329 | NA     | NA     | NA | Sjp_0041670.1 | NA                                            | NA       |
| unknown     | NA | NA       | NA       | SJC_S000330 | NA     | NA     | NA | Sjp_0041700.1 | NA                                            | NA       |
| unknown     | NA | NA       | NA       | SJC_S000330 | NA     | NA     | NA | Sjp_0041710.1 | NA                                            | NA       |
| HSB10kb_569 | WZ | 54815574 | 54866314 | SJC_S000331 | 1835   | 51493  | +  | Sjp_0041720.1 | binding                                       | 0.052762 |
| HSB10kb_569 | WZ | 54815574 | 54866314 | SJC_S000331 | 1835   | 51493  | +  | Sjp_0041730.1 | cellular component organization or biogenesis | NA       |
| HSB10kb_569 | WZ | 54815574 | 54866314 | SJC_S000331 | 1835   | 51493  | +  | Sjp_0041740.1 | biological regulation                         | 0.76396  |
| unknown     | NA | NA       | NA       | SJC_S000331 | NA     | NA     | NA | Sjp_0041750.1 | NA                                            | NA       |
| unknown     | NA | NA       | NA       | SJC_S000331 | NA     | NA     | NA | Sjp_0041760.1 | cellular component organization or biogenesis | NA       |
| unknown     | NA | NA       | NA       | SJC_S000331 | NA     | NA     | NA | Sjp_0041770.1 | biological regulation                         | 0.76396  |
| unknown     | NA | NA       | NA       | SJC_S000331 | NA     | NA     | NA | Sjp_0041780.1 | NA                                            | NA       |
| unknown     | NA | NA       | NA       | SJC_S000331 | NA     | NA     | NA | Sjp_0041790.1 | NA                                            | NA       |
| unknown     | NA | NA       | NA       | SJC_S000331 | NA     | NA     | NA | Sjp_0041810.1 | NA                                            | NA       |

|             |       |          |          |             |        |        |    |               |                               |          |
|-------------|-------|----------|----------|-------------|--------|--------|----|---------------|-------------------------------|----------|
| HSB10kb_570 | 2     | 19835700 | 20133697 | SJC_S000332 | 198975 | 426844 | -  | Sjp_0041820.1 | transporter activity          | 0.782    |
| HSB10kb_570 | 2     | 19835700 | 20133697 | SJC_S000332 | 198975 | 426844 | -  | Sjp_0041830.1 | NA                            | NA       |
| HSB10kb_570 | 2     | 19835700 | 20133697 | SJC_S000332 | 198975 | 426844 | -  | Sjp_0041840.1 | biological regulation         | 0.76396  |
| HSB10kb_570 | 2     | 19835700 | 20133697 | SJC_S000332 | 198975 | 426844 | -  | Sjp_0041850.1 | NA                            | NA       |
| HSB10kb_570 | 2     | 19835700 | 20133697 | SJC_S000332 | 198975 | 426844 | -  | Sjp_0041860.1 | NA                            | NA       |
| HSB10kb_570 | 2     | 19835700 | 20133697 | SJC_S000332 | 198975 | 426844 | -  | Sjp_0041880.1 | NA                            | NA       |
| HSB10kb_570 | 2     | 19835700 | 20133697 | SJC_S000332 | 198975 | 426844 | -  | Sjp_0041890.1 | establishment of localization | NA       |
| unknown     | NA    | NA       | NA       | SJC_S000333 | NA     | NA     | NA | Sjp_0041900.1 | NA                            | NA       |
| unknown     | NA    | NA       | NA       | SJC_S000333 | NA     | NA     | NA | Sjp_0041910.1 | catalytic activity            | 0.035844 |
| HSB10kb_571 | 1     | 14211818 | 14222285 | SJC_S000333 | 22944  | 61150  | +  | Sjp_0041920.1 | NA                            | NA       |
| HSB10kb_571 | 1     | 14211818 | 14222285 | SJC_S000333 | 22944  | 61150  | +  | Sjp_0041930.1 | NA                            | NA       |
| HSB10kb_571 | 1     | 14211818 | 14222285 | SJC_S000333 | 22944  | 61150  | +  | Sjp_0041940.1 | NA                            | NA       |
| EBR10kb_330 | "1,1" | NA       | NA       | SJC_S000333 | 61151  | 90252  | NA | Sjp_0041950.1 | cell part                     | 0.009037 |
| EBR10kb_330 | "1,1" | NA       | NA       | SJC_S000333 | 61151  | 90252  | NA | Sjp_0041960.1 | NA                            | NA       |
| EBR10kb_330 | "1,1" | NA       | NA       | SJC_S000333 | 61151  | 90252  | NA | Sjp_0041970.1 | cellular process              | 0.63852  |
| HSB10kb_572 | 1     | 14322907 | 14374017 | SJC_S000333 | 90253  | 123903 | +  | Sjp_0041970.1 | cellular process              | 0.63852  |
| HSB10kb_572 | 1     | 14322907 | 14374017 | SJC_S000333 | 90253  | 123903 | +  | Sjp_0041980.1 | NA                            | NA       |
| unknown     | NA    | NA       | NA       | SJC_S000334 | NA     | NA     | NA | Sjp_0041990.1 | cell part                     | 0.009037 |
| unknown     | NA    | NA       | NA       | SJC_S000334 | NA     | NA     | NA | Sjp_0042000.1 | NA                            | NA       |
| unknown     | NA    | NA       | NA       | SJC_S000334 | NA     | NA     | NA | Sjp_0042010.1 | NA                            | NA       |
| unknown     | NA    | NA       | NA       | SJC_S000335 | NA     | NA     | NA | Sjp_0042020.1 | NA                            | NA       |
| unknown     | NA    | NA       | NA       | SJC_S000335 | NA     | NA     | NA | Sjp_0042030.1 | cell part                     | 0.009037 |
| unknown     | NA    | NA       | NA       | SJC_S000335 | NA     | NA     | NA | Sjp_0042040.1 | cellular process              | 0.63852  |
| unknown     | NA    | NA       | NA       | SJC_S000335 | NA     | NA     | NA | Sjp_0042050.1 | NA                            | NA       |
| unknown     | NA    | NA       | NA       | SJC_S000335 | NA     | NA     | NA | Sjp_0042060.1 | catalytic activity            | 0.035844 |
| unknown     | NA    | NA       | NA       | SJC_S000335 | NA     | NA     | NA | Sjp_0042070.1 | NA                            | NA       |
| unknown     | NA    | NA       | NA       | SJC_S000335 | NA     | NA     | NA | Sjp_0042080.1 | NA                            | NA       |
| unknown     | NA    | NA       | NA       | SJC_S000335 | NA     | NA     | NA | Sjp_0042090.1 | binding                       | 0.052762 |
| unknown     | NA    | NA       | NA       | SJC_S000335 | NA     | NA     | NA | Sjp_0042100.1 | NA                            | NA       |
| unknown     | NA    | NA       | NA       | SJC_S000335 | NA     | NA     | NA | Sjp_0042110.1 | NA                            | NA       |
| unknown     | NA    | NA       | NA       | SJC_S000335 | NA     | NA     | NA | Sjp_0042120.1 | NA                            | NA       |

|             |       |          |          |             |        |        |    |               |                       |          |
|-------------|-------|----------|----------|-------------|--------|--------|----|---------------|-----------------------|----------|
| unknown     | NA    | NA       | NA       | SJC_S000335 | NA     | NA     | NA | Sjp_0042130.1 | NA                    | NA       |
| unknown     | NA    | NA       | NA       | SJC_S000336 | NA     | NA     | NA | Sjp_0042140.1 | developmental process | NA       |
| unknown     | NA    | NA       | NA       | SJC_S000336 | NA     | NA     | NA | Sjp_0042150.1 | NA                    | NA       |
| unknown     | NA    | NA       | NA       | SJC_S000336 | NA     | NA     | NA | Sjp_0042160.1 | cellular process      | 0.63852  |
| unknown     | NA    | NA       | NA       | SJC_S000336 | NA     | NA     | NA | Sjp_0042170.1 | NA                    | NA       |
| unknown     | NA    | NA       | NA       | SJC_S000336 | NA     | NA     | NA | Sjp_0042180.1 | NA                    | NA       |
| unknown     | NA    | NA       | NA       | SJC_S000336 | NA     | NA     | NA | Sjp_0042190.1 | NA                    | NA       |
| unknown     | NA    | NA       | NA       | SJC_S000336 | NA     | NA     | NA | Sjp_0042200.1 | NA                    | NA       |
| unknown     | NA    | NA       | NA       | SJC_S000336 | NA     | NA     | NA | Sjp_0042210.1 | catalytic activity    | 0.035844 |
| unknown     | NA    | NA       | NA       | SJC_S000336 | NA     | NA     | NA | Sjp_0042220.1 | NA                    | NA       |
| unknown     | NA    | NA       | NA       | SJC_S000336 | NA     | NA     | NA | Sjp_0042230.1 | NA                    | NA       |
| unknown     | NA    | NA       | NA       | SJC_S000336 | NA     | NA     | NA | Sjp_0042240.1 | NA                    | NA       |
| unknown     | NA    | NA       | NA       | SJC_S000336 | NA     | NA     | NA | Sjp_0042250.1 | NA                    | NA       |
| unknown     | NA    | NA       | NA       | SJC_S000336 | NA     | NA     | NA | Sjp_0042260.1 | NA                    | NA       |
| unknown     | NA    | NA       | NA       | SJC_S000336 | NA     | NA     | NA | Sjp_0042270.1 | NA                    | NA       |
| unknown     | NA    | NA       | NA       | SJC_S000336 | NA     | NA     | NA | Sjp_0042280.1 | catalytic activity    | 0.035844 |
| unknown     | NA    | NA       | NA       | SJC_S000336 | NA     | NA     | NA | Sjp_0042290.1 | NA                    | NA       |
| unknown     | NA    | NA       | NA       | SJC_S000336 | NA     | NA     | NA | Sjp_0042300.1 | NA                    | NA       |
| unknown     | NA    | NA       | NA       | SJC_S000336 | NA     | NA     | NA | Sjp_0042310.1 | NA                    | NA       |
| unknown     | NA    | NA       | NA       | SJC_S000337 | NA     | NA     | NA | Sjp_0042320.1 | cell part             | 0.009037 |
| unknown     | NA    | NA       | NA       | SJC_S000337 | NA     | NA     | NA | Sjp_0042330.1 | NA                    | NA       |
| unknown     | NA    | NA       | NA       | SJC_S000337 | NA     | NA     | NA | Sjp_0042340.1 | NA                    | NA       |
| unknown     | NA    | NA       | NA       | SJC_S000338 | NA     | NA     | NA | Sjp_0042350.1 | NA                    | NA       |
| HSB10kb_573 | 2     | 34391356 | 34459323 | SJC_S000338 | 32832  | 109489 | +  | Sjp_0042360.1 | NA                    | NA       |
| HSB10kb_573 | 2     | 34391356 | 34459323 | SJC_S000338 | 32832  | 109489 | +  | Sjp_0042370.1 | NA                    | NA       |
| EBR10kb_331 | "2,2" | NA       | NA       | SJC_S000338 | 109490 | 299265 | NA | Sjp_0042370.1 | NA                    | NA       |
| EBR10kb_331 | "2,2" | NA       | NA       | SJC_S000338 | 109490 | 299265 | NA | Sjp_0042380.1 | NA                    | NA       |
| EBR10kb_331 | "2,2" | NA       | NA       | SJC_S000338 | 109490 | 299265 | NA | Sjp_0042390.1 | NA                    | NA       |
| EBR10kb_331 | "2,2" | NA       | NA       | SJC_S000338 | 109490 | 299265 | NA | Sjp_0042400.1 | binding               | 0.052762 |
| EBR10kb_331 | "2,2" | NA       | NA       | SJC_S000338 | 109490 | 299265 | NA | Sjp_0042410.1 | catalytic activity    | 0.035844 |
| EBR10kb_331 | "2,2" | NA       | NA       | SJC_S000338 | 109490 | 299265 | NA | Sjp_0042420.1 | cell part             | 0.009037 |
| HSB10kb_574 | 2     | 31084386 | 31399776 | SJC_S000338 | 299266 | 589263 | +  | Sjp_0042420.1 | cell part             | 0.009037 |
| HSB10kb_574 | 2     | 31084386 | 31399776 | SJC_S000338 | 299266 | 589263 | +  | Sjp_0042430.1 | NA                    | NA       |

|             |       |          |          |             |        |        |    |               |                               |          |
|-------------|-------|----------|----------|-------------|--------|--------|----|---------------|-------------------------------|----------|
| HSB10kb_574 | 2     | 31084386 | 31399776 | SJC_S000338 | 299266 | 589263 | +  | Sjp_0042440.1 | catalytic activity            | 0.035844 |
| HSB10kb_574 | 2     | 31084386 | 31399776 | SJC_S000338 | 299266 | 589263 | +  | Sjp_0042450.1 | NA                            | NA       |
| HSB10kb_574 | 2     | 31084386 | 31399776 | SJC_S000338 | 299266 | 589263 | +  | Sjp_0042460.1 | transporter activity          | 0.782    |
| HSB10kb_574 | 2     | 31084386 | 31399776 | SJC_S000338 | 299266 | 589263 | +  | Sjp_0042470.1 | NA                            | NA       |
| HSB10kb_574 | 2     | 31084386 | 31399776 | SJC_S000338 | 299266 | 589263 | +  | Sjp_0042480.1 | NA                            | NA       |
| HSB10kb_574 | 2     | 31084386 | 31399776 | SJC_S000338 | 299266 | 589263 | +  | Sjp_0042490.1 | molecular transducer activity | 0.50162  |
| HSB10kb_575 | 7     | 3817485  | 3889998  | SJC_S000339 | 8411   | 118327 | -  | Sjp_0042500.1 | NA                            | NA       |
| HSB10kb_575 | 7     | 3817485  | 3889998  | SJC_S000339 | 8411   | 118327 | -  | Sjp_0042510.1 | NA                            | NA       |
| HSB10kb_575 | 7     | 3817485  | 3889998  | SJC_S000339 | 8411   | 118327 | -  | Sjp_0042520.1 | NA                            | NA       |
| HSB10kb_575 | 7     | 3817485  | 3889998  | SJC_S000339 | 8411   | 118327 | -  | Sjp_0042530.1 | NA                            | NA       |
| EBR10kb_332 | "7,7" | NA       | NA       | SJC_S000339 | 118328 | 141619 | NA | Sjp_0042530.1 | NA                            | NA       |
| HSB10kb_576 | 7     | 3748359  | 3795903  | SJC_S000339 | 141620 | 200904 | -  | Sjp_0042540.1 | catalytic activity            | 0.035844 |
| HSB10kb_576 | 7     | 3748359  | 3795903  | SJC_S000339 | 141620 | 200904 | -  | Sjp_0042550.1 | NA                            | NA       |
| EBR10kb_333 | "7,7" | NA       | NA       | SJC_S000339 | 200905 | 213909 | NA | Sjp_0042550.1 | NA                            | NA       |
| HSB10kb_577 | 7     | 3522461  | 3742267  | SJC_S000339 | 213910 | 377169 | -  | Sjp_0042550.1 | NA                            | NA       |
| HSB10kb_577 | 7     | 3522461  | 3742267  | SJC_S000339 | 213910 | 377169 | -  | Sjp_0042560.1 | NA                            | NA       |
| HSB10kb_577 | 7     | 3522461  | 3742267  | SJC_S000339 | 213910 | 377169 | -  | Sjp_0042570.1 | NA                            | NA       |
| HSB10kb_577 | 7     | 3522461  | 3742267  | SJC_S000339 | 213910 | 377169 | -  | Sjp_0042580.1 | response to stimulus          | NA       |
| HSB10kb_577 | 7     | 3522461  | 3742267  | SJC_S000339 | 213910 | 377169 | -  | Sjp_0042590.1 | cell part                     | 0.009037 |
| HSB10kb_578 | 6     | 6194974  | 6401110  | SJC_S000340 | 8089   | 182907 | +  | Sjp_0042600.1 | NA                            | NA       |
| HSB10kb_578 | 6     | 6194974  | 6401110  | SJC_S000340 | 8089   | 182907 | +  | Sjp_0042610.1 | transporter activity          | 0.782    |
| HSB10kb_578 | 6     | 6194974  | 6401110  | SJC_S000340 | 8089   | 182907 | +  | Sjp_0042620.1 | biological regulation         | 0.76396  |
| unknown     | NA    | NA       | NA       | SJC_S000340 | NA     | NA     | NA | Sjp_0042640.1 | NA                            | NA       |
| unknown     | NA    | NA       | NA       | SJC_S000340 | NA     | NA     | NA | Sjp_0042650.1 | NA                            | NA       |
| unknown     | NA    | NA       | NA       | SJC_S000340 | NA     | NA     | NA | Sjp_0042660.1 | NA                            | NA       |
| unknown     | NA    | NA       | NA       | SJC_S000340 | NA     | NA     | NA | Sjp_0042670.1 | NA                            | NA       |
| unknown     | NA    | NA       | NA       | SJC_S000340 | NA     | NA     | NA | Sjp_0042680.1 | NA                            | NA       |
| unknown     | NA    | NA       | NA       | SJC_S000341 | NA     | NA     | NA | Sjp_0042690.1 | NA                            | NA       |

|             |       |          |          |             |        |        |    |               |                       |          |
|-------------|-------|----------|----------|-------------|--------|--------|----|---------------|-----------------------|----------|
| HSB10kb_579 | 4     | 3109019  | 3284820  | SJC_S000343 | 92312  | 280240 | +  | Sjp_0042700.1 | NA                    | NA       |
| HSB10kb_579 | 4     | 3109019  | 3284820  | SJC_S000343 | 92312  | 280240 | +  | Sjp_0042710.1 | NA                    | NA       |
| HSB10kb_579 | 4     | 3109019  | 3284820  | SJC_S000343 | 92312  | 280240 | +  | Sjp_0042720.1 | NA                    | NA       |
| HSB10kb_579 | 4     | 3109019  | 3284820  | SJC_S000343 | 92312  | 280240 | +  | Sjp_0042730.1 | catalytic activity    | 0.035844 |
| HSB10kb_579 | 4     | 3109019  | 3284820  | SJC_S000343 | 92312  | 280240 | +  | Sjp_0042740.1 | NA                    | NA       |
| HSB10kb_579 | 4     | 3109019  | 3284820  | SJC_S000343 | 92312  | 280240 | +  | Sjp_0042750.1 | NA                    | NA       |
| HSB10kb_579 | 4     | 3109019  | 3284820  | SJC_S000343 | 92312  | 280240 | +  | Sjp_0042760.1 | cell part             | 0.009037 |
| EBR10kb_334 | "4,4" | NA       | NA       | SJC_S000343 | 280241 | 344953 | NA | Sjp_0042760.1 | cell part             | 0.009037 |
| EBR10kb_334 | "4,4" | NA       | NA       | SJC_S000343 | 280241 | 344953 | NA | Sjp_0042770.1 | catalytic activity    | 0.035844 |
| HSB10kb_580 | 4     | 3337168  | 3352445  | SJC_S000343 | 344954 | 370855 | -  | Sjp_0042780.1 | NA                    | NA       |
| HSB10kb_581 | 2     | 16580861 | 16698961 | SJC_S000344 | 3636   | 103668 | +  | Sjp_0042790.1 | NA                    | NA       |
| HSB10kb_581 | 2     | 16580861 | 16698961 | SJC_S000344 | 3636   | 103668 | +  | Sjp_0042800.1 | catalytic activity    | 0.035844 |
| HSB10kb_581 | 2     | 16580861 | 16698961 | SJC_S000344 | 3636   | 103668 | +  | Sjp_0042810.1 | NA                    | NA       |
| HSB10kb_581 | 2     | 16580861 | 16698961 | SJC_S000344 | 3636   | 103668 | +  | Sjp_0042820.1 | biological regulation | 0.76396  |
| EBR10kb_335 | "2,2" | NA       | NA       | SJC_S000344 | 103669 | 142048 | NA | Sjp_0042830.1 | NA                    | NA       |
| EBR10kb_335 | "2,2" | NA       | NA       | SJC_S000344 | 103669 | 142048 | NA | Sjp_0042840.1 | NA                    | NA       |
| HSB10kb_582 | 2     | 16750153 | 16792611 | SJC_S000344 | 142049 | 174422 | -  | Sjp_0042840.1 | NA                    | NA       |
| HSB10kb_582 | 2     | 16750153 | 16792611 | SJC_S000344 | 142049 | 174422 | -  | Sjp_0042850.1 | NA                    | NA       |
| HSB10kb_582 | 2     | 16750153 | 16792611 | SJC_S000344 | 142049 | 174422 | -  | Sjp_0042860.1 | response to stimulus  | NA       |
| HSB10kb_582 | 2     | 16750153 | 16792611 | SJC_S000344 | 142049 | 174422 | -  | Sjp_0042870.1 | NA                    | NA       |
| unknown     | NA    | NA       | NA       | SJC_S000344 | NA     | NA     | NA | Sjp_0042880.1 | catalytic activity    | 0.035844 |
| unknown     | NA    | NA       | NA       | SJC_S000345 | NA     | NA     | NA | Sjp_0042900.1 | binding               | 0.052762 |
| HSB10kb_583 | 1     | 58210011 | 58259906 | SJC_S000345 | 176696 | 231580 | -  | Sjp_0042910.1 | NA                    | NA       |
| HSB10kb_583 | 1     | 58210011 | 58259906 | SJC_S000345 | 176696 | 231580 | -  | Sjp_0042920.1 | NA                    | NA       |
| unknown     | NA    | NA       | NA       | SJC_S000346 | NA     | NA     | NA | Sjp_0042930.1 | cell part             | 0.009037 |
| unknown     | NA    | NA       | NA       | SJC_S000346 | NA     | NA     | NA | Sjp_0042940.1 | NA                    | NA       |
| HSB10kb_584 | 2     | 11271307 | 11302238 | SJC_S000346 | 97208  | 128272 | +  | Sjp_0042950.1 | cell part             | 0.009037 |
| unknown     | NA    | NA       | NA       | SJC_S000347 | NA     | NA     | NA | Sjp_0042960.1 | NA                    | NA       |
| unknown     | NA    | NA       | NA       | SJC_S000347 | NA     | NA     | NA | Sjp_0042970.1 | cell part             | 0.009037 |
| unknown     | NA    | NA       | NA       | SJC_S000347 | NA     | NA     | NA | Sjp_0042980.1 | catalytic activity    | 0.035844 |
| unknown     | NA    | NA       | NA       | SJC_S000347 | NA     | NA     | NA | Sjp_0042990.1 | catalytic activity    | 0.035844 |
| unknown     | NA    | NA       | NA       | SJC_S000347 | NA     | NA     | NA | Sjp_0043000.1 | catalytic activity    | 0.035844 |

|             |    |        |         |             |      |       |    |               |                        |          |
|-------------|----|--------|---------|-------------|------|-------|----|---------------|------------------------|----------|
| unknown     | NA | NA     | NA      | SJC_S000347 | NA   | NA    | NA | Sjp_0043010.1 | NA                     | NA       |
| unknown     | NA | NA     | NA      | SJC_S000347 | NA   | NA    | NA | Sjp_0043020.1 | developmental process  | NA       |
| unknown     | NA | NA     | NA      | SJC_S000347 | NA   | NA    | NA | Sjp_0043030.1 | NA                     | NA       |
| unknown     | NA | NA     | NA      | SJC_S000347 | NA   | NA    | NA | Sjp_0043040.1 | NA                     | NA       |
| unknown     | NA | NA     | NA      | SJC_S000347 | NA   | NA    | NA | Sjp_0043050.1 | transporter activity   | 0.782    |
| unknown     | NA | NA     | NA      | SJC_S000347 | NA   | NA    | NA | Sjp_0043060.1 | NA                     | NA       |
| unknown     | NA | NA     | NA      | SJC_S000347 | NA   | NA    | NA | Sjp_0043070.1 | transporter activity   | 0.782    |
| unknown     | NA | NA     | NA      | SJC_S000347 | NA   | NA    | NA | Sjp_0043080.1 | NA                     | NA       |
| unknown     | NA | NA     | NA      | SJC_S000348 | NA   | NA    | NA | Sjp_0043090.1 | NA                     | NA       |
| unknown     | NA | NA     | NA      | SJC_S000348 | NA   | NA    | NA | Sjp_0043100.1 | binding                | 0.052762 |
| unknown     | NA | NA     | NA      | SJC_S000349 | NA   | NA    | NA | Sjp_0043110.1 | NA                     | NA       |
| unknown     | NA | NA     | NA      | SJC_S000349 | NA   | NA    | NA | Sjp_0043120.1 | NA                     | NA       |
| unknown     | NA | NA     | NA      | SJC_S000350 | NA   | NA    | NA | Sjp_0043130.1 | multi-organism process | NA       |
| unknown     | NA | NA     | NA      | SJC_S000350 | NA   | NA    | NA | Sjp_0043140.1 | biological regulation  | 0.76396  |
| unknown     | NA | NA     | NA      | SJC_S000350 | NA   | NA    | NA | Sjp_0043150.1 | NA                     | NA       |
| unknown     | NA | NA     | NA      | SJC_S000350 | NA   | NA    | NA | Sjp_0043160.1 | binding                | 0.052762 |
| unknown     | NA | NA     | NA      | SJC_S000350 | NA   | NA    | NA | Sjp_0043170.1 | binding                | 0.052762 |
| unknown     | NA | NA     | NA      | SJC_S000352 | NA   | NA    | NA | Sjp_0043180.1 | biological regulation  | 0.76396  |
| unknown     | NA | NA     | NA      | SJC_S000352 | NA   | NA    | NA | Sjp_0043190.1 | NA                     | NA       |
| unknown     | NA | NA     | NA      | SJC_S000352 | NA   | NA    | NA | Sjp_0043200.1 | NA                     | NA       |
| unknown     | NA | NA     | NA      | SJC_S000352 | NA   | NA    | NA | Sjp_0043210.1 | NA                     | NA       |
| unknown     | NA | NA     | NA      | SJC_S000352 | NA   | NA    | NA | Sjp_0043220.1 | NA                     | NA       |
| unknown     | NA | NA     | NA      | SJC_S000352 | NA   | NA    | NA | Sjp_0043230.1 | catalytic activity     | 0.035844 |
| unknown     | NA | NA     | NA      | SJC_S000352 | NA   | NA    | NA | Sjp_0043240.1 | cellular process       | 0.63852  |
| HSB10kb_585 | 7  | 974566 | 1004991 | SJC_S000353 | 4644 | 50837 | -  | Sjp_0043260.1 | NA                     | NA       |
| HSB10kb_585 | 7  | 974566 | 1004991 | SJC_S000353 | 4644 | 50837 | -  | Sjp_0043270.1 | NA                     | NA       |
| unknown     | NA | NA     | NA      | SJC_S000353 | NA   | NA    | NA | Sjp_0043280.1 | NA                     | NA       |
| unknown     | NA | NA     | NA      | SJC_S000353 | NA   | NA    | NA | Sjp_0043290.1 | NA                     | NA       |

|             |       |          |          |             |        |        |    |               |                       |          |
|-------------|-------|----------|----------|-------------|--------|--------|----|---------------|-----------------------|----------|
| unknown     | NA    | NA       | NA       | SJC_S000353 | NA     | NA     | NA | Sjp_0043300.1 | NA                    | NA       |
| unknown     | NA    | NA       | NA       | SJC_S000353 | NA     | NA     | NA | Sjp_0043310.1 | immune system process | NA       |
| unknown     | NA    | NA       | NA       | SJC_S000353 | NA     | NA     | NA | Sjp_0043320.1 | metabolic process     | 0.41934  |
| HSB10kb_586 | 4     | 1094943  | 1289783  | SJC_S000354 | 25864  | 233244 | +  | Sjp_0043330.1 | NA                    | NA       |
| HSB10kb_586 | 4     | 1094943  | 1289783  | SJC_S000354 | 25864  | 233244 | +  | Sjp_0043350.1 | NA                    | NA       |
| HSB10kb_586 | 4     | 1094943  | 1289783  | SJC_S000354 | 25864  | 233244 | +  | Sjp_0043360.1 | cell part             | 0.009037 |
| HSB10kb_586 | 4     | 1094943  | 1289783  | SJC_S000354 | 25864  | 233244 | +  | Sjp_0043370.1 | NA                    | NA       |
| EBR10kb_336 | "4,4" | NA       | NA       | SJC_S000354 | 233245 | 238081 | NA | Sjp_0043380.1 | NA                    | NA       |
| HSB10kb_587 | 4     | 1297389  | 1343052  | SJC_S000354 | 238082 | 272728 | -  | Sjp_0043380.1 | NA                    | NA       |
| HSB10kb_587 | 4     | 1297389  | 1343052  | SJC_S000354 | 238082 | 272728 | -  | Sjp_0043390.1 | NA                    | NA       |
| unknown     | NA    | NA       | NA       | SJC_S000354 | NA     | NA     | NA | Sjp_0043400.1 | developmental process | NA       |
| unknown     | NA    | NA       | NA       | SJC_S000354 | NA     | NA     | NA | Sjp_0043410.1 | NA                    | NA       |
| unknown     | NA    | NA       | NA       | SJC_S000355 | NA     | NA     | NA | Sjp_0043420.1 | catalytic activity    | 0.035844 |
| HSB10kb_588 | 3     | 20858061 | 20881758 | SJC_S000355 | 26614  | 46116  | -  | NA            | NA                    | NA       |
| EBR10kb_337 | "3,3" | NA       | NA       | SJC_S000355 | 46117  | 108835 | NA | Sjp_0043430.1 | cell part             | 0.009037 |
| EBR10kb_337 | "3,3" | NA       | NA       | SJC_S000355 | 46117  | 108835 | NA | Sjp_0043440.1 | NA                    | NA       |
| EBR10kb_337 | "3,3" | NA       | NA       | SJC_S000355 | 46117  | 108835 | NA | Sjp_0043450.1 | biological regulation | 0.76396  |
| HSB10kb_589 | 3     | 24557875 | 24602419 | SJC_S000355 | 108836 | 159648 | -  | Sjp_0043450.1 | biological regulation | 0.76396  |
| HSB10kb_589 | 3     | 24557875 | 24602419 | SJC_S000355 | 108836 | 159648 | -  | Sjp_0043460.1 | NA                    | NA       |
| EBR10kb_338 | "3,3" | NA       | NA       | SJC_S000355 | 159649 | 177301 | NA | Sjp_0043470.1 | NA                    | NA       |
| HSB10kb_590 | 3     | 24636523 | 24764674 | SJC_S000355 | 177302 | 284812 | +  | Sjp_0043480.1 | locomotion            | NA       |
| HSB10kb_590 | 3     | 24636523 | 24764674 | SJC_S000355 | 177302 | 284812 | +  | Sjp_0043490.1 | cell part             | 0.009037 |
| HSB10kb_590 | 3     | 24636523 | 24764674 | SJC_S000355 | 177302 | 284812 | +  | Sjp_0043500.1 | catalytic activity    | 0.035844 |
| unknown     | NA    | NA       | NA       | SJC_S000356 | NA     | NA     | NA | Sjp_0043510.1 | biological regulation | 0.76396  |
| unknown     | NA    | NA       | NA       | SJC_S000356 | NA     | NA     | NA | Sjp_0043520.1 | NA                    | NA       |
| unknown     | NA    | NA       | NA       | SJC_S000356 | NA     | NA     | NA | Sjp_0043530.1 | NA                    | NA       |
| unknown     | NA    | NA       | NA       | SJC_S000357 | NA     | NA     | NA | Sjp_0043540.1 | NA                    | NA       |
| HSB10kb_591 | 6     | 15627463 | 15707641 | SJC_S000357 | 59295  | 113875 | +  | Sjp_0043550.1 | NA                    | NA       |



|             |    |          |          |             |       |        |    |               |                                               |          |
|-------------|----|----------|----------|-------------|-------|--------|----|---------------|-----------------------------------------------|----------|
| HSB10kb_591 | 6  | 15627463 | 15707641 | SJC_S000357 | 59295 | 113875 | +  | Sjp_0043560.1 | NA                                            | NA       |
| HSB10kb_591 | 6  | 15627463 | 15707641 | SJC_S000357 | 59295 | 113875 | +  | Sjp_0043570.1 | NA                                            | NA       |
| unknown     | NA | NA       | NA       | SJC_S000358 | NA    | NA     | NA | Sjp_0043580.1 | NA                                            | NA       |
| unknown     | NA | NA       | NA       | SJC_S000358 | NA    | NA     | NA | Sjp_0043590.1 | NA                                            | NA       |
| unknown     | NA | NA       | NA       | SJC_S000358 | NA    | NA     | NA | Sjp_0043610.1 | catalytic activity                            | 0.035844 |
| unknown     | NA | NA       | NA       | SJC_S000358 | NA    | NA     | NA | Sjp_0043620.1 | binding                                       | 0.052762 |
| unknown     | NA | NA       | NA       | SJC_S000358 | NA    | NA     | NA | Sjp_0043630.1 | NA                                            | NA       |
| unknown     | NA | NA       | NA       | SJC_S000358 | NA    | NA     | NA | Sjp_0043640.1 | binding                                       | 0.052762 |
| unknown     | NA | NA       | NA       | SJC_S000358 | NA    | NA     | NA | Sjp_0043650.1 | NA                                            | NA       |
| unknown     | NA | NA       | NA       | SJC_S000359 | NA    | NA     | NA | Sjp_0043660.1 | NA                                            | NA       |
| unknown     | NA | NA       | NA       | SJC_S000359 | NA    | NA     | NA | Sjp_0043670.1 | NA                                            | NA       |
| unknown     | NA | NA       | NA       | SJC_S000359 | NA    | NA     | NA | Sjp_0043680.1 | binding                                       | 0.052762 |
| unknown     | NA | NA       | NA       | SJC_S000359 | NA    | NA     | NA | Sjp_0043690.1 | binding                                       | 0.052762 |
| unknown     | NA | NA       | NA       | SJC_S000359 | NA    | NA     | NA | Sjp_0043700.1 | catalytic activity                            | 0.035844 |
| unknown     | NA | NA       | NA       | SJC_S000359 | NA    | NA     | NA | Sjp_0043710.1 | NA                                            | NA       |
| HSB10kb_592 | 1  | 16292035 | 16503225 | SJC_S000360 | 1635  | 194352 | +  | Sjp_0043720.1 | binding                                       | 0.052762 |
| HSB10kb_592 | 1  | 16292035 | 16503225 | SJC_S000360 | 1635  | 194352 | +  | Sjp_0043730.1 | NA                                            | NA       |
| HSB10kb_592 | 1  | 16292035 | 16503225 | SJC_S000360 | 1635  | 194352 | +  | Sjp_0043740.1 | NA                                            | NA       |
| HSB10kb_592 | 1  | 16292035 | 16503225 | SJC_S000360 | 1635  | 194352 | +  | Sjp_0043750.1 | NA                                            | NA       |
| HSB10kb_592 | 1  | 16292035 | 16503225 | SJC_S000360 | 1635  | 194352 | +  | Sjp_0043760.1 | NA                                            | NA       |
| HSB10kb_592 | 1  | 16292035 | 16503225 | SJC_S000360 | 1635  | 194352 | +  | Sjp_0043770.1 | catalytic activity                            | 0.035844 |
| HSB10kb_592 | 1  | 16292035 | 16503225 | SJC_S000360 | 1635  | 194352 | +  | Sjp_0043780.1 | NA                                            | NA       |
| HSB10kb_592 | 1  | 16292035 | 16503225 | SJC_S000360 | 1635  | 194352 | +  | Sjp_0043790.1 | cellular component organization or biogenesis | NA       |
| HSB10kb_592 | 1  | 16292035 | 16503225 | SJC_S000360 | 1635  | 194352 | +  | Sjp_0043800.1 | catalytic activity                            | 0.035844 |
| HSB10kb_592 | 1  | 16292035 | 16503225 | SJC_S000360 | 1635  | 194352 | +  | Sjp_0043810.1 | cell part                                     | 0.009037 |
| HSB10kb_592 | 1  | 16292035 | 16503225 | SJC_S000360 | 1635  | 194352 | +  | Sjp_0043820.1 | NA                                            | NA       |
| unknown     | NA | NA       | NA       | SJC_S000361 | NA    | NA     | NA | Sjp_0043830.1 | NA                                            | NA       |
| unknown     | NA | NA       | NA       | SJC_S000361 | NA    | NA     | NA | Sjp_0043840.1 | NA                                            | NA       |
| unknown     | NA | NA       | NA       | SJC_S000361 | NA    | NA     | NA | Sjp_0043850.1 | catalytic activity                            | 0.035844 |
| unknown     | NA | NA       | NA       | SJC_S000362 | NA    | NA     | NA | Sjp_0043860.1 | NA                                            | NA       |
| HSB10kb_593 | 2  | 29588992 | 29789283 | SJC_S000363 | 878   | 171849 | +  | Sjp_0043870.1 | NA                                            | NA       |

|             |       |          |          |             |        |        |    |               |                       |          |
|-------------|-------|----------|----------|-------------|--------|--------|----|---------------|-----------------------|----------|
| HSB10kb_593 | 2     | 29588992 | 29789283 | SJC_S000363 | 878    | 171849 | +  | Sjp_0043880.1 | cellular process      | 0.63852  |
| HSB10kb_593 | 2     | 29588992 | 29789283 | SJC_S000363 | 878    | 171849 | +  | Sjp_0043890.1 | NA                    | NA       |
| HSB10kb_593 | 2     | 29588992 | 29789283 | SJC_S000363 | 878    | 171849 | +  | Sjp_0043900.1 | NA                    | NA       |
| EBR10kb_339 | "2,2" | NA       | NA       | SJC_S000363 | 171850 | 183363 | NA | Sjp_0043900.1 | NA                    | NA       |
| HSB10kb_594 | 2     | 29901501 | 29916194 | SJC_S000363 | 183364 | 194276 | +  | Sjp_0043900.1 | NA                    | NA       |
| EBR10kb_340 | "2,2" | NA       | NA       | SJC_S000363 | 194277 | 208111 | NA | Sjp_0043910.1 | NA                    | NA       |
| HSB10kb_595 | 2     | 29798401 | 29891537 | SJC_S000363 | 208112 | 308153 | -  | Sjp_0043910.1 | NA                    | NA       |
| HSB10kb_595 | 2     | 29798401 | 29891537 | SJC_S000363 | 208112 | 308153 | -  | Sjp_0043920.1 | NA                    | NA       |
| HSB10kb_595 | 2     | 29798401 | 29891537 | SJC_S000363 | 208112 | 308153 | -  | Sjp_0043930.1 | binding               | 0.052762 |
| HSB10kb_595 | 2     | 29798401 | 29891537 | SJC_S000363 | 208112 | 308153 | -  | Sjp_0043940.1 | NA                    | NA       |
| EBR10kb_341 | "2,2" | NA       | NA       | SJC_S000363 | 308154 | 319508 | NA | Sjp_0043950.1 | NA                    | NA       |
| HSB10kb_596 | 2     | 29929671 | 30054577 | SJC_S000363 | 319509 | 407395 | +  | Sjp_0043950.1 | NA                    | NA       |
| HSB10kb_596 | 2     | 29929671 | 30054577 | SJC_S000363 | 319509 | 407395 | +  | Sjp_0043960.1 | cell part             | 0.009037 |
| HSB10kb_596 | 2     | 29929671 | 30054577 | SJC_S000363 | 319509 | 407395 | +  | Sjp_0043970.1 | NA                    | NA       |
| HSB10kb_596 | 2     | 29929671 | 30054577 | SJC_S000363 | 319509 | 407395 | +  | Sjp_0043980.1 | biological regulation | 0.76396  |
| HSB10kb_596 | 2     | 29929671 | 30054577 | SJC_S000363 | 319509 | 407395 | +  | Sjp_0043990.1 | cell part             | 0.009037 |
| HSB10kb_596 | 2     | 29929671 | 30054577 | SJC_S000363 | 319509 | 407395 | +  | Sjp_0044000.1 | NA                    | NA       |
| unknown     | NA    | NA       | NA       | SJC_S000363 | NA     | NA     | NA | Sjp_0044010.1 | NA                    | NA       |
| HSB10kb_597 | 1     | 28086272 | 28209588 | SJC_S000364 | 29848  | 179788 | -  | Sjp_0044020.1 | transporter activity  | 0.782    |
| HSB10kb_597 | 1     | 28086272 | 28209588 | SJC_S000364 | 29848  | 179788 | -  | Sjp_0044030.1 | NA                    | NA       |
| HSB10kb_597 | 1     | 28086272 | 28209588 | SJC_S000364 | 29848  | 179788 | -  | Sjp_0044040.1 | transporter activity  | 0.782    |
| HSB10kb_597 | 1     | 28086272 | 28209588 | SJC_S000364 | 29848  | 179788 | -  | Sjp_0044050.1 | NA                    | NA       |
| HSB10kb_597 | 1     | 28086272 | 28209588 | SJC_S000364 | 29848  | 179788 | -  | Sjp_0044060.1 | NA                    | NA       |
| HSB10kb_597 | 1     | 28086272 | 28209588 | SJC_S000364 | 29848  | 179788 | -  | Sjp_0044070.1 | NA                    | NA       |
| unknown     | NA    | NA       | NA       | SJC_S000365 | NA     | NA     | NA | Sjp_0044080.1 | NA                    | NA       |
| unknown     | NA    | NA       | NA       | SJC_S000365 | NA     | NA     | NA | Sjp_0044090.1 | metabolic process     | 0.41934  |
| unknown     | NA    | NA       | NA       | SJC_S000365 | NA     | NA     | NA | Sjp_0044100.1 | catalytic activity    | 0.035844 |
| unknown     | NA    | NA       | NA       | SJC_S000366 | NA     | NA     | NA | Sjp_0044110.1 | NA                    | NA       |
| HSB10kb_598 | 7     | 8608699  | 8620323  | SJC_S000366 | 35036  | 48418  | +  | Sjp_0044120.1 | NA                    | NA       |
| EBR10kb_342 | "7,7" | NA       | NA       | SJC_S000366 | 48419  | 127186 | NA | Sjp_0044120.1 | NA                    | NA       |

|             |       |          |          |             |        |        |    |               |                                  |          |
|-------------|-------|----------|----------|-------------|--------|--------|----|---------------|----------------------------------|----------|
| EBR10kb_342 | "7,7" | NA       | NA       | SJC_S000366 | 48419  | 127186 | NA | Sjp_0044130.1 | NA                               | NA       |
| EBR10kb_342 | "7,7" | NA       | NA       | SJC_S000366 | 48419  | 127186 | NA | Sjp_0044140.1 | NA                               | NA       |
| EBR10kb_342 | "7,7" | NA       | NA       | SJC_S000366 | 48419  | 127186 | NA | Sjp_0044150.1 | catalytic activity               | 0.035844 |
| HSB10kb_599 | 7     | 8489508  | 8522747  | SJC_S000366 | 127187 | 165128 | +  | Sjp_0044150.1 | catalytic activity               | 0.035844 |
| HSB10kb_600 | WZ    | 58247662 | 58409332 | SJC_S000367 | 11025  | 190434 | -  | Sjp_0044160.1 | NA                               | NA       |
| HSB10kb_600 | WZ    | 58247662 | 58409332 | SJC_S000367 | 11025  | 190434 | -  | Sjp_0044170.1 | catalytic activity               | 0.035844 |
| HSB10kb_600 | WZ    | 58247662 | 58409332 | SJC_S000367 | 11025  | 190434 | -  | Sjp_0044180.1 | NA                               | NA       |
| HSB10kb_601 | 1     | 50964266 | 51030229 | SJC_S000368 | 120167 | 193260 | -  | Sjp_0044200.1 | cell part                        | 0.009037 |
| HSB10kb_601 | 1     | 50964266 | 51030229 | SJC_S000368 | 120167 | 193260 | -  | Sjp_0044210.1 | immune system process            | NA       |
| HSB10kb_601 | 1     | 50964266 | 51030229 | SJC_S000368 | 120167 | 193260 | -  | Sjp_0044220.1 | NA                               | NA       |
| unknown     | NA    | NA       | NA       | SJC_S000368 | NA     | NA     | NA | Sjp_0044230.1 | transcription regulator activity | NA       |
| unknown     | NA    | NA       | NA       | SJC_S000368 | NA     | NA     | NA | Sjp_0044240.1 | catalytic activity               | 0.035844 |
| unknown     | NA    | NA       | NA       | SJC_S000368 | NA     | NA     | NA | Sjp_0044250.1 | NA                               | NA       |
| unknown     | NA    | NA       | NA       | SJC_S000368 | NA     | NA     | NA | Sjp_0044260.1 | cell part                        | 0.009037 |
| unknown     | NA    | NA       | NA       | SJC_S000369 | NA     | NA     | NA | Sjp_0044270.1 | NA                               | NA       |
| unknown     | NA    | NA       | NA       | SJC_S000369 | NA     | NA     | NA | Sjp_0044280.1 | NA                               | NA       |
| HSB10kb_602 | 6     | 2329665  | 2404043  | SJC_S000369 | 33186  | 85827  | +  | Sjp_0044290.1 | NA                               | NA       |
| HSB10kb_602 | 6     | 2329665  | 2404043  | SJC_S000369 | 33186  | 85827  | +  | Sjp_0044300.1 | NA                               | NA       |
| EBR10kb_343 | "6,6" | NA       | NA       | SJC_S000369 | 85828  | 93316  | NA | Sjp_0044310.1 | catalytic activity               | 0.035844 |
| HSB10kb_603 | 6     | 819957   | 856366   | SJC_S000369 | 93317  | 149426 | -  | Sjp_0044310.1 | catalytic activity               | 0.035844 |
| HSB10kb_604 | 7     | 8379259  | 8434711  | SJC_S000370 | 1697   | 69796  | +  | Sjp_0044330.1 | NA                               | NA       |
| HSB10kb_604 | 7     | 8379259  | 8434711  | SJC_S000370 | 1697   | 69796  | +  | Sjp_0044340.1 | NA                               | NA       |
| HSB10kb_604 | 7     | 8379259  | 8434711  | SJC_S000370 | 1697   | 69796  | +  | Sjp_0044350.1 | NA                               | NA       |
| EBR10kb_344 | "7,7" | NA       | NA       | SJC_S000370 | 69797  | 112855 | NA | Sjp_0044360.1 | NA                               | NA       |
| HSB10kb_605 | 7     | 8548915  | 8581916  | SJC_S000370 | 112856 | 169071 |    | Sjp_0044370.1 | NA                               | NA       |
| unknown     | NA    | NA       | NA       | SJC_S000370 | NA     | NA     | NA | Sjp_0044380.1 | NA                               | NA       |
| unknown     | NA    | NA       | NA       | SJC_S000371 | NA     | NA     | NA | Sjp_0044390.1 | NA                               | NA       |
| unknown     | NA    | NA       | NA       | SJC_S000371 | NA     | NA     | NA | Sjp_0044400.1 | binding                          | 0.052762 |
| unknown     | NA    | NA       | NA       | SJC_S000371 | NA     | NA     | NA | Sjp_0044410.1 | NA                               | NA       |
| HSB10kb_606 | 1     | 24028921 | 24073232 | SJC_S000371 | 44287  | 131536 | -  | Sjp_0044420.1 | catalytic activity               | 0.035844 |
| HSB10kb_606 | 1     | 24028921 | 24073232 | SJC_S000371 | 44287  | 131536 | -  | Sjp_0044430.1 | NA                               | NA       |

|             |       |          |          |             |        |        |    |               |                       |          |
|-------------|-------|----------|----------|-------------|--------|--------|----|---------------|-----------------------|----------|
| HSB10kb_606 | 1     | 24028921 | 24073232 | SJC_S000371 | 44287  | 131536 | -  | Sjp_0044450.1 | cellular process      | 0.63852  |
| HSB10kb_606 | 1     | 24028921 | 24073232 | SJC_S000371 | 44287  | 131536 | -  | Sjp_0044460.1 | NA                    | NA       |
| EBR10kb_345 | "1,1" | NA       | NA       | SJC_S000371 | 131537 | 164114 | NA | Sjp_0044470.1 | binding               | 0.052762 |
| HSB10kb_607 | 1     | 170513   | 316926   | SJC_S000371 | 164115 | 259343 | +  | Sjp_0044470.1 | binding               | 0.052762 |
| HSB10kb_607 | 1     | 170513   | 316926   | SJC_S000371 | 164115 | 259343 | +  | Sjp_0044480.1 | NA                    | NA       |
| HSB10kb_607 | 1     | 170513   | 316926   | SJC_S000371 | 164115 | 259343 | +  | Sjp_0044490.1 | NA                    | NA       |
| HSB10kb_607 | 1     | 170513   | 316926   | SJC_S000371 | 164115 | 259343 | +  | Sjp_0044500.1 | NA                    | NA       |
| unknown     | NA    | NA       | NA       | SJC_S000371 | NA     | NA     | NA | Sjp_0044510.1 | NA                    | NA       |
| unknown     | NA    | NA       | NA       | SJC_S000372 | NA     | NA     | NA | Sjp_0044520.1 | NA                    | NA       |
| HSB10kb_608 | 6     | 1741561  | 1826084  | SJC_S000372 | 32151  | 126174 | +  | Sjp_0044530.1 | catalytic activity    | 0.035844 |
| HSB10kb_608 | 6     | 1741561  | 1826084  | SJC_S000372 | 32151  | 126174 | +  | Sjp_0044540.1 | biological regulation | 0.76396  |
| HSB10kb_608 | 6     | 1741561  | 1826084  | SJC_S000372 | 32151  | 126174 | +  | Sjp_0044550.1 | binding               | 0.052762 |
| HSB10kb_608 | 6     | 1741561  | 1826084  | SJC_S000372 | 32151  | 126174 | +  | Sjp_0044560.1 | NA                    | NA       |
| HSB10kb_608 | 6     | 1741561  | 1826084  | SJC_S000372 | 32151  | 126174 | +  | Sjp_0044570.1 | NA                    | NA       |
| unknown     | NA    | NA       | NA       | SJC_S000372 | NA     | NA     | NA | Sjp_0044580.1 | NA                    | NA       |
| unknown     | NA    | NA       | NA       | SJC_S000373 | NA     | NA     | NA | Sjp_0044590.1 | NA                    | NA       |
| unknown     | NA    | NA       | NA       | SJC_S000374 | NA     | NA     | NA | Sjp_0044610.1 | catalytic activity    | 0.035844 |
| unknown     | NA    | NA       | NA       | SJC_S000376 | NA     | NA     | NA | Sjp_0044620.1 | NA                    | NA       |
| unknown     | NA    | NA       | NA       | SJC_S000376 | NA     | NA     | NA | Sjp_0044630.1 | NA                    | NA       |
| unknown     | NA    | NA       | NA       | SJC_S000376 | NA     | NA     | NA | Sjp_0044640.1 | cell part             | 0.009037 |
| unknown     | NA    | NA       | NA       | SJC_S000376 | NA     | NA     | NA | Sjp_0044650.1 | NA                    | NA       |
| unknown     | NA    | NA       | NA       | SJC_S000376 | NA     | NA     | NA | Sjp_0044660.1 | binding               | 0.052762 |
| unknown     | NA    | NA       | NA       | SJC_S000376 | NA     | NA     | NA | Sjp_0044670.1 | binding               | 0.052762 |
| unknown     | NA    | NA       | NA       | SJC_S000376 | NA     | NA     | NA | Sjp_0044680.1 | NA                    | NA       |
| unknown     | NA    | NA       | NA       | SJC_S000377 | NA     | NA     | NA | Sjp_0044690.1 | NA                    | NA       |
| unknown     | NA    | NA       | NA       | SJC_S000377 | NA     | NA     | NA | Sjp_0044700.1 | NA                    | NA       |
| unknown     | NA    | NA       | NA       | SJC_S000377 | NA     | NA     | NA | Sjp_0044710.1 | NA                    | NA       |
| HSB10kb_609 | 7     | 5776518  | 5806764  | SJC_S000377 | 170849 | 205720 | -  | Sjp_0044720.1 | cell part             | 0.009037 |
| HSB10kb_610 | 2     | 30518170 | 30555972 | SJC_S000378 | 3028   | 44629  | +  | Sjp_0044730.1 | transporter activity  | 0.782    |
| HSB10kb_610 | 2     | 30518170 | 30555972 | SJC_S000378 | 3028   | 44629  | +  | Sjp_0044740.1 | NA                    | NA       |
| HSB10kb_610 | 2     | 30518170 | 30555972 | SJC_S000378 | 3028   | 44629  | +  | Sjp_0044750.1 | catalytic activity    | 0.035844 |
| unknown     | NA    | NA       | NA       | SJC_S000379 | NA     | NA     | NA | Sjp_0044760.1 | NA                    | NA       |

|             |    |          |          |             |       |        |    |               |                      |          |
|-------------|----|----------|----------|-------------|-------|--------|----|---------------|----------------------|----------|
| unknown     | NA | NA       | NA       | SJC_S000379 | NA    | NA     | NA | Sjp_0044770.1 | binding              | 0.052762 |
| HSB10kb_611 | 1  | 7979008  | 8108321  | SJC_S000379 | 33273 | 137183 | -  | Sjp_0044790.1 | response to stimulus | NA       |
| unknown     | NA | NA       | NA       | SJC_S000379 | NA    | NA     | NA | Sjp_0044800.1 | NA                   | NA       |
| HSB10kb_612 | 2  | 2673348  | 2720404  | SJC_S000380 | 5545  | 44473  | +  | Sjp_0044810.1 | transporter activity | 0.782    |
| unknown     | NA | NA       | NA       | SJC_S000380 | NA    | NA     | NA | Sjp_0044820.1 | catalytic activity   | 0.035844 |
| unknown     | NA | NA       | NA       | SJC_S000380 | NA    | NA     | NA | Sjp_0044830.1 | NA                   | NA       |
| unknown     | NA | NA       | NA       | SJC_S000381 | NA    | NA     | NA | Sjp_0044840.1 | NA                   | NA       |
| unknown     | NA | NA       | NA       | SJC_S000381 | NA    | NA     | NA | Sjp_0044850.1 | NA                   | NA       |
| HSB10kb_613 | WZ | 36266354 | 36287826 | SJC_S000382 | 6218  | 35614  | +  | Sjp_0044860.1 | NA                   | NA       |
| unknown     | NA | NA       | NA       | SJC_S000382 | NA    | NA     | NA | Sjp_0044870.1 | NA                   | NA       |
| unknown     | NA | NA       | NA       | SJC_S000382 | NA    | NA     | NA | Sjp_0044880.1 | NA                   | NA       |
| unknown     | NA | NA       | NA       | SJC_S000382 | NA    | NA     | NA | Sjp_0044890.1 | binding              | 0.052762 |
| unknown     | NA | NA       | NA       | SJC_S000383 | NA    | NA     | NA | Sjp_0044900.1 | catalytic activity   | 0.035844 |
| unknown     | NA | NA       | NA       | SJC_S000383 | NA    | NA     | NA | Sjp_0044910.1 | cell part            | 0.009037 |
| unknown     | NA | NA       | NA       | SJC_S000383 | NA    | NA     | NA | Sjp_0044920.1 | cell part            | 0.009037 |
| unknown     | NA | NA       | NA       | SJC_S000383 | NA    | NA     | NA | Sjp_0044930.1 | transporter activity | 0.782    |
| unknown     | NA | NA       | NA       | SJC_S000383 | NA    | NA     | NA | Sjp_0044940.1 | transporter activity | 0.782    |
| unknown     | NA | NA       | NA       | SJC_S000383 | NA    | NA     | NA | Sjp_0044950.1 | NA                   | NA       |
| unknown     | NA | NA       | NA       | SJC_S000383 | NA    | NA     | NA | Sjp_0044960.1 | NA                   | NA       |
| unknown     | NA | NA       | NA       | SJC_S000383 | NA    | NA     | NA | Sjp_0044970.1 | NA                   | NA       |
| unknown     | NA | NA       | NA       | SJC_S000383 | NA    | NA     | NA | Sjp_0044980.1 | NA                   | NA       |
| unknown     | NA | NA       | NA       | SJC_S000383 | NA    | NA     | NA | Sjp_0044990.1 | NA                   | NA       |
| unknown     | NA | NA       | NA       | SJC_S000383 | NA    | NA     | NA | Sjp_0045000.1 | transporter activity | 0.782    |
| unknown     | NA | NA       | NA       | SJC_S000383 | NA    | NA     | NA | Sjp_0045010.1 | NA                   | NA       |
| unknown     | NA | NA       | NA       | SJC_S000384 | NA    | NA     | NA | Sjp_0045020.1 | binding              | 0.052762 |
| unknown     | NA | NA       | NA       | SJC_S000384 | NA    | NA     | NA | Sjp_0045030.1 | NA                   | NA       |
| unknown     | NA | NA       | NA       | SJC_S000384 | NA    | NA     | NA | Sjp_0045040.1 | NA                   | NA       |
| unknown     | NA | NA       | NA       | SJC_S000384 | NA    | NA     | NA | Sjp_0045050.1 | binding              | 0.052762 |
| unknown     | NA | NA       | NA       | SJC_S000384 | NA    | NA     | NA | Sjp_0045060.1 | NA                   | NA       |

|             |       |         |         |             |        |        |    |               |                                               |          |
|-------------|-------|---------|---------|-------------|--------|--------|----|---------------|-----------------------------------------------|----------|
| unknown     | NA    | NA      | NA      | SJC_S000384 | NA     | NA     | NA | Sjp_0045080.1 | NA                                            | NA       |
| unknown     | NA    | NA      | NA      | SJC_S000384 | NA     | NA     | NA | Sjp_0045090.1 | NA                                            | NA       |
| unknown     | NA    | NA      | NA      | SJC_S000384 | NA     | NA     | NA | Sjp_0045100.1 | NA                                            | NA       |
| unknown     | NA    | NA      | NA      | SJC_S000384 | NA     | NA     | NA | Sjp_0045110.1 | cell part                                     | 0.009037 |
| unknown     | NA    | NA      | NA      | SJC_S000384 | NA     | NA     | NA | Sjp_0045120.1 | catalytic activity                            | 0.035844 |
| unknown     | NA    | NA      | NA      | SJC_S000384 | NA     | NA     | NA | Sjp_0045130.1 | NA                                            | NA       |
| unknown     | NA    | NA      | NA      | SJC_S000384 | NA     | NA     | NA | Sjp_0045140.1 | NA                                            | NA       |
| unknown     | NA    | NA      | NA      | SJC_S000385 | NA     | NA     | NA | Sjp_0045150.1 | binding                                       | 0.052762 |
| unknown     | NA    | NA      | NA      | SJC_S000385 | NA     | NA     | NA | Sjp_0045160.1 | NA                                            | NA       |
| unknown     | NA    | NA      | NA      | SJC_S000385 | NA     | NA     | NA | Sjp_0045170.1 | NA                                            | NA       |
| unknown     | NA    | NA      | NA      | SJC_S000385 | NA     | NA     | NA | Sjp_0045180.1 | enzyme regulator activity                     | 0.1755   |
| unknown     | NA    | NA      | NA      | SJC_S000385 | NA     | NA     | NA | Sjp_0045190.1 | binding                                       | 0.052762 |
| unknown     | NA    | NA      | NA      | SJC_S000385 | NA     | NA     | NA | Sjp_0045200.1 | cell part                                     | 0.009037 |
| unknown     | NA    | NA      | NA      | SJC_S000385 | NA     | NA     | NA | Sjp_0045210.1 | NA                                            | NA       |
| unknown     | NA    | NA      | NA      | SJC_S000385 | NA     | NA     | NA | Sjp_0045230.1 | molecular transducer activity                 | 0.50162  |
| unknown     | NA    | NA      | NA      | SJC_S000385 | NA     | NA     | NA | Sjp_0045240.1 | NA                                            | NA       |
| unknown     | NA    | NA      | NA      | SJC_S000385 | NA     | NA     | NA | Sjp_0045250.1 | NA                                            | NA       |
| HSB10kb_614 | 1     | 4032452 | 4120375 | SJC_S000386 | 34143  | 112133 | -  | Sjp_0045260.1 | cellular component organization or biogenesis | NA       |
| HSB10kb_614 | 1     | 4032452 | 4120375 | SJC_S000386 | 34143  | 112133 | -  | Sjp_0045270.1 | NA                                            | NA       |
| EBR10kb_346 | "1,1" | NA      | NA      | SJC_S000386 | 112134 | 137834 | NA | Sjp_0045270.1 | NA                                            | NA       |
| EBR10kb_346 | "1,1" | NA      | NA      | SJC_S000386 | 112134 | 137834 | NA | Sjp_0045280.1 | NA                                            | NA       |
| EBR10kb_346 | "1,1" | NA      | NA      | SJC_S000386 | 112134 | 137834 | NA | Sjp_0045290.1 | NA                                            | NA       |
| HSB10kb_615 | 1     | 3937959 | 4010663 | SJC_S000386 | 137835 | 211248 | +  | Sjp_0045290.1 | NA                                            | NA       |
| HSB10kb_615 | 1     | 3937959 | 4010663 | SJC_S000386 | 137835 | 211248 | +  | Sjp_0045300.1 | NA                                            | NA       |
| HSB10kb_615 | 1     | 3937959 | 4010663 | SJC_S000386 | 137835 | 211248 | +  | Sjp_0045310.1 | cell part                                     | 0.009037 |
| EBR10kb_347 | "1,1" | NA      | NA      | SJC_S000386 | 211249 | 234127 | NA | Sjp_0045320.1 | cell part                                     | 0.009037 |
| EBR10kb_347 | "1,1" | NA      | NA      | SJC_S000386 | 211249 | 234127 | NA | Sjp_0045330.1 | cell part                                     | 0.009037 |

|             |    |          |          |             |        |        |    |               |                                               |          |
|-------------|----|----------|----------|-------------|--------|--------|----|---------------|-----------------------------------------------|----------|
| HSB10kb_616 | 1  | 3765840  | 3887385  | SJC_S000386 | 234128 | 360764 | -  | Sjp_0045330.1 | cell part                                     | 0.009037 |
| HSB10kb_616 | 1  | 3765840  | 3887385  | SJC_S000386 | 234128 | 360764 | -  | Sjp_0045340.1 | cell part                                     | 0.009037 |
| HSB10kb_616 | 1  | 3765840  | 3887385  | SJC_S000386 | 234128 | 360764 | -  | Sjp_0045350.1 | NA                                            | NA       |
| HSB10kb_616 | 1  | 3765840  | 3887385  | SJC_S000386 | 234128 | 360764 | -  | Sjp_0045360.1 | NA                                            | NA       |
| HSB10kb_616 | 1  | 3765840  | 3887385  | SJC_S000386 | 234128 | 360764 | -  | Sjp_0045370.1 | NA                                            | NA       |
| unknown     | NA | NA       | NA       | SJC_S000387 | NA     | NA     | NA | Sjp_0045380.1 | NA                                            | NA       |
| unknown     | NA | NA       | NA       | SJC_S000387 | NA     | NA     | NA | Sjp_0045390.1 | catalytic activity                            | 0.035844 |
| unknown     | NA | NA       | NA       | SJC_S000387 | NA     | NA     | NA | Sjp_0045400.1 | response to stimulus                          | NA       |
| HSB10kb_617 | 1  | 47879466 | 47972942 | SJC_S000387 | 248607 | 342908 | -  | Sjp_0045410.1 | NA                                            | NA       |
| HSB10kb_617 | 1  | 47879466 | 47972942 | SJC_S000387 | 248607 | 342908 | -  | Sjp_0045420.1 | NA                                            | NA       |
| HSB10kb_617 | 1  | 47879466 | 47972942 | SJC_S000387 | 248607 | 342908 | -  | Sjp_0045430.1 | NA                                            | NA       |
| unknown     | NA | NA       | NA       | SJC_S000388 | NA     | NA     | NA | Sjp_0045440.1 | catalytic activity                            | 0.035844 |
| unknown     | NA | NA       | NA       | SJC_S000388 | NA     | NA     | NA | Sjp_0045450.1 | NA                                            | NA       |
| unknown     | NA | NA       | NA       | SJC_S000388 | NA     | NA     | NA | Sjp_0045460.1 | NA                                            | NA       |
| unknown     | NA | NA       | NA       | SJC_S000388 | NA     | NA     | NA | Sjp_0045470.1 | NA                                            | NA       |
| unknown     | NA | NA       | NA       | SJC_S000388 | NA     | NA     | NA | Sjp_0045480.1 | NA                                            | NA       |
| unknown     | NA | NA       | NA       | SJC_S000388 | NA     | NA     | NA | Sjp_0045490.1 | NA                                            | NA       |
| HSB10kb_618 | 3  | 16901401 | 16915488 | SJC_S000388 | 75447  | 96187  | -  | Sjp_0045500.1 | binding                                       | 0.052762 |
| HSB10kb_619 | WZ | 47401757 | 47544122 | SJC_S000389 | 16766  | 131199 | -  | Sjp_0045510.1 | NA                                            | NA       |
| HSB10kb_619 | WZ | 47401757 | 47544122 | SJC_S000389 | 16766  | 131199 | -  | Sjp_0045520.1 | NA                                            | NA       |
| HSB10kb_619 | WZ | 47401757 | 47544122 | SJC_S000389 | 16766  | 131199 | -  | Sjp_0045530.1 | cell part                                     | 0.009037 |
| HSB10kb_619 | WZ | 47401757 | 47544122 | SJC_S000389 | 16766  | 131199 | -  | Sjp_0045540.1 | NA                                            | NA       |
| unknown     | NA | NA       | NA       | SJC_S000389 | NA     | NA     | NA | Sjp_0045550.1 | NA                                            | NA       |
| unknown     | NA | NA       | NA       | SJC_S000389 | NA     | NA     | NA | Sjp_0045560.1 | NA                                            | NA       |
| unknown     | NA | NA       | NA       | SJC_S000390 | NA     | NA     | NA | Sjp_0045570.1 | NA                                            | NA       |
| HSB10kb_620 | 2  | 3525969  | 3730099  | SJC_S000390 | 17001  | 245085 | -  | Sjp_0045580.1 | NA                                            | NA       |
| HSB10kb_620 | 2  | 3525969  | 3730099  | SJC_S000390 | 17001  | 245085 | -  | Sjp_0045590.1 | cellular component organization or biogenesis | NA       |
| HSB10kb_620 | 2  | 3525969  | 3730099  | SJC_S000390 | 17001  | 245085 | -  | Sjp_0045600.1 | NA                                            | NA       |
| HSB10kb_620 | 2  | 3525969  | 3730099  | SJC_S000390 | 17001  | 245085 | -  | Sjp_0045610.1 | cellular process                              | 0.63852  |
| HSB10kb_620 | 2  | 3525969  | 3730099  | SJC_S000390 | 17001  | 245085 | -  | Sjp_0045620.1 | biological                                    | 0.76396  |

|             |         |          |          |             |        |        |    |               |                       |          |
|-------------|---------|----------|----------|-------------|--------|--------|----|---------------|-----------------------|----------|
|             |         |          |          |             |        |        |    |               | regulation            |          |
| HSB10kb_620 | 2       | 3525969  | 3730099  | SJC_S000390 | 17001  | 245085 | -  | Sjp_0045630.1 | binding               | 0.052762 |
| HSB10kb_620 | 2       | 3525969  | 3730099  | SJC_S000390 | 17001  | 245085 | -  | Sjp_0045640.1 | binding               | 0.052762 |
| unknown     | NA      | NA       | NA       | SJC_S000391 | NA     | NA     | NA | Sjp_0045650.1 | NA                    | NA       |
| HSB10kb_621 | 3       | 15967133 | 16068767 | SJC_S000391 | 104441 | 198194 | +  | Sjp_0045660.1 | NA                    | NA       |
| HSB10kb_621 | 3       | 15967133 | 16068767 | SJC_S000391 | 104441 | 198194 | +  | Sjp_0045670.1 | catalytic activity    | 0.035844 |
| HSB10kb_621 | 3       | 15967133 | 16068767 | SJC_S000391 | 104441 | 198194 | +  | Sjp_0045680.1 | NA                    | NA       |
| EBR10kb_348 | "3,3"   | NA       | NA       | SJC_S000391 | 198195 | 237335 | NA | Sjp_0045680.1 | NA                    | NA       |
| EBR10kb_348 | "3,3"   | NA       | NA       | SJC_S000391 | 198195 | 237335 | NA | Sjp_0045690.1 | cell part             | 0.009037 |
| EBR10kb_348 | "3,3"   | NA       | NA       | SJC_S000391 | 198195 | 237335 | NA | Sjp_0045700.1 | NA                    | NA       |
| EBR10kb_348 | "3,3"   | NA       | NA       | SJC_S000391 | 198195 | 237335 | NA | Sjp_0045710.1 | NA                    | NA       |
| HSB10kb_622 | 3       | 21559315 | 21640561 | SJC_S000391 | 237336 | 321238 | -  | Sjp_0045710.1 | NA                    | NA       |
| HSB10kb_622 | 3       | 21559315 | 21640561 | SJC_S000391 | 237336 | 321238 | -  | Sjp_0045720.1 | NA                    | NA       |
| HSB10kb_622 | 3       | 21559315 | 21640561 | SJC_S000391 | 237336 | 321238 | -  | Sjp_0045730.1 | NA                    | NA       |
| unknown     | NA      | NA       | NA       | SJC_S000392 | NA     | NA     | NA | Sjp_0045750.1 | catalytic activity    | 0.035844 |
| unknown     | NA      | NA       | NA       | SJC_S000392 | NA     | NA     | NA | Sjp_0045760.1 | NA                    | NA       |
| unknown     | NA      | NA       | NA       | SJC_S000393 | NA     | NA     | NA | Sjp_0045770.1 | NA                    | NA       |
| unknown     | NA      | NA       | NA       | SJC_S000393 | NA     | NA     | NA | Sjp_0045780.1 | NA                    | NA       |
| unknown     | NA      | NA       | NA       | SJC_S000393 | NA     | NA     | NA | Sjp_0045790.1 | cell part             | 0.009037 |
| unknown     | NA      | NA       | NA       | SJC_S000394 | NA     | NA     | NA | Sjp_0045800.1 | NA                    | NA       |
| unknown     | NA      | NA       | NA       | SJC_S000394 | NA     | NA     | NA | Sjp_0045810.1 | NA                    | NA       |
| unknown     | NA      | NA       | NA       | SJC_S000394 | NA     | NA     | NA | Sjp_0045820.1 | NA                    | NA       |
| unknown     | NA      | NA       | NA       | SJC_S000394 | NA     | NA     | NA | Sjp_0045830.1 | NA                    | NA       |
| HSB10kb_623 | WZ      | 7743700  | 7796537  | SJC_S000395 | 28543  | 68782  | +  | Sjp_0045840.1 | NA                    | NA       |
| HSB10kb_623 | WZ      | 7743700  | 7796537  | SJC_S000395 | 28543  | 68782  | +  | Sjp_0045850.1 | immune system process | NA       |
| EBR10kb_349 | "WZ,WZ" | NA       | NA       | SJC_S000395 | 68783  | 107689 | NA | Sjp_0045850.1 | immune system process | NA       |
| EBR10kb_349 | "WZ,WZ" | NA       | NA       | SJC_S000395 | 68783  | 107689 | NA | Sjp_0045860.1 | NA                    | NA       |
| HSB10kb_624 | WZ      | 7833984  | 7851585  | SJC_S000395 | 107690 | 119351 | -  | Sjp_0045860.1 | NA                    | NA       |
| EBR10kb_350 | "WZ,WZ" | NA       | NA       | SJC_S000395 | 119352 | 125153 | NA | NA            | NA                    | NA       |
| HSB10kb_625 | WZ      | 7868092  | 7976444  | SJC_S000395 | 125154 | 244601 | +  | Sjp_0045870.1 | NA                    | NA       |
| HSB10kb_625 | WZ      | 7868092  | 7976444  | SJC_S000395 | 125154 | 244601 | +  | Sjp_0045890.1 | NA                    | NA       |
| HSB10kb_625 | WZ      | 7868092  | 7976444  | SJC_S000395 | 125154 | 244601 | +  | Sjp_0045900.1 | establishment         | NA       |



|             |       |          |          |             |        |        |    |               |                       |          |
|-------------|-------|----------|----------|-------------|--------|--------|----|---------------|-----------------------|----------|
|             |       |          |          |             |        |        |    |               | of localization       |          |
| HSB10kb_625 | WZ    | 7868092  | 7976444  | SJC_S000395 | 125154 | 244601 | +  | Sjp_0045910.1 | catalytic activity    | 0.035844 |
| unknown     | NA    | NA       | NA       | SJC_S000396 | NA     | NA     | NA | Sjp_0045920.1 | NA                    | NA       |
| HSB10kb_626 | 4     | 29430319 | 29466624 | SJC_S000397 | 15773  | 76302  | +  | Sjp_0045930.1 | NA                    | NA       |
| HSB10kb_626 | 4     | 29430319 | 29466624 | SJC_S000397 | 15773  | 76302  | +  | Sjp_0045940.1 | NA                    | NA       |
| HSB10kb_626 | 4     | 29430319 | 29466624 | SJC_S000397 | 15773  | 76302  | +  | Sjp_0045950.1 | NA                    | NA       |
| HSB10kb_626 | 4     | 29430319 | 29466624 | SJC_S000397 | 15773  | 76302  | +  | Sjp_0045960.1 | NA                    | NA       |
| unknown     | NA    | NA       | NA       | SJC_S000398 | NA     | NA     | NA | Sjp_0045990.1 | NA                    | NA       |
| unknown     | NA    | NA       | NA       | SJC_S000398 | NA     | NA     | NA | Sjp_0046000.1 | NA                    | NA       |
| unknown     | NA    | NA       | NA       | SJC_S000398 | NA     | NA     | NA | Sjp_0046010.1 | catalytic activity    | 0.035844 |
| unknown     | NA    | NA       | NA       | SJC_S000398 | NA     | NA     | NA | Sjp_0046020.1 | NA                    | NA       |
| unknown     | NA    | NA       | NA       | SJC_S000398 | NA     | NA     | NA | Sjp_0046030.1 | catalytic activity    | 0.035844 |
| unknown     | NA    | NA       | NA       | SJC_S000398 | NA     | NA     | NA | Sjp_0046040.1 | cell part             | 0.009037 |
| unknown     | NA    | NA       | NA       | SJC_S000398 | NA     | NA     | NA | Sjp_0046050.1 | NA                    | NA       |
| HSB10kb_627 | 2     | 21899160 | 22078559 | SJC_S000399 | 13740  | 269718 | -  | Sjp_0046060.1 | NA                    | NA       |
| HSB10kb_627 | 2     | 21899160 | 22078559 | SJC_S000399 | 13740  | 269718 | -  | Sjp_0046070.1 | NA                    | NA       |
| HSB10kb_627 | 2     | 21899160 | 22078559 | SJC_S000399 | 13740  | 269718 | -  | Sjp_0046080.1 | catalytic activity    | 0.035844 |
| HSB10kb_627 | 2     | 21899160 | 22078559 | SJC_S000399 | 13740  | 269718 | -  | Sjp_0046090.1 | transporter activity  | 0.782    |
| HSB10kb_627 | 2     | 21899160 | 22078559 | SJC_S000399 | 13740  | 269718 | -  | Sjp_0046100.1 | transporter activity  | 0.782    |
| HSB10kb_627 | 2     | 21899160 | 22078559 | SJC_S000399 | 13740  | 269718 | -  | Sjp_0046110.1 | NA                    | NA       |
| HSB10kb_627 | 2     | 21899160 | 22078559 | SJC_S000399 | 13740  | 269718 | -  | Sjp_0046120.1 | binding               | 0.052762 |
| HSB10kb_627 | 2     | 21899160 | 22078559 | SJC_S000399 | 13740  | 269718 | -  | Sjp_0046130.1 | NA                    | NA       |
| HSB10kb_627 | 2     | 21899160 | 22078559 | SJC_S000399 | 13740  | 269718 | -  | Sjp_0046140.1 | NA                    | NA       |
| EBR10kb_351 | "2,2" | NA       | NA       | SJC_S000399 | 269719 | 281731 | NA | Sjp_0046140.1 | NA                    | NA       |
| HSB10kb_628 | 2     | 21853296 | 21891529 | SJC_S000399 | 281732 | 304379 | +  | Sjp_0046150.1 | NA                    | NA       |
| unknown     | NA    | NA       | NA       | SJC_S000400 | NA     | NA     | NA | Sjp_0046160.1 | NA                    | NA       |
| unknown     | NA    | NA       | NA       | SJC_S000400 | NA     | NA     | NA | Sjp_0046170.1 | NA                    | NA       |
| unknown     | NA    | NA       | NA       | SJC_S000400 | NA     | NA     | NA | Sjp_0046180.1 | metabolic process     | 0.41934  |
| unknown     | NA    | NA       | NA       | SJC_S000400 | NA     | NA     | NA | Sjp_0046190.1 | catalytic activity    | 0.035844 |
| unknown     | NA    | NA       | NA       | SJC_S000400 | NA     | NA     | NA | Sjp_0046200.1 | immune system process | NA       |

|             |       |          |          |             |        |        |    |               |                                               |          |
|-------------|-------|----------|----------|-------------|--------|--------|----|---------------|-----------------------------------------------|----------|
| unknown     | NA    | NA       | NA       | SJC_S000400 | NA     | NA     | NA | Sjp_0046210.1 | NA                                            | NA       |
| unknown     | NA    | NA       | NA       | SJC_S000400 | NA     | NA     | NA | Sjp_0046220.1 | cellular component organization or biogenesis | NA       |
| unknown     | NA    | NA       | NA       | SJC_S000400 | NA     | NA     | NA | Sjp_0046230.1 | cell part                                     | 0.009037 |
| unknown     | NA    | NA       | NA       | SJC_S000402 | NA     | NA     | NA | Sjp_0046240.1 | cellular process                              | 0.63852  |
| unknown     | NA    | NA       | NA       | SJC_S000403 | NA     | NA     | NA | Sjp_0046250.1 | catalytic activity                            | 0.035844 |
| unknown     | NA    | NA       | NA       | SJC_S000403 | NA     | NA     | NA | Sjp_0046260.1 | biological regulation                         | 0.76396  |
| unknown     | NA    | NA       | NA       | SJC_S000403 | NA     | NA     | NA | Sjp_0046270.1 | NA                                            | NA       |
| unknown     | NA    | NA       | NA       | SJC_S000403 | NA     | NA     | NA | Sjp_0046280.1 | binding                                       | 0.052762 |
| unknown     | NA    | NA       | NA       | SJC_S000403 | NA     | NA     | NA | Sjp_0046290.1 | NA                                            | NA       |
| HSB10kb_629 | 1     | 36856455 | 36901131 | SJC_S000403 | 136669 | 173581 | +  | Sjp_0046300.1 | NA                                            | NA       |
| HSB10kb_629 | 1     | 36856455 | 36901131 | SJC_S000403 | 136669 | 173581 | +  | Sjp_0046310.1 | NA                                            | NA       |
| unknown     | NA    | NA       | NA       | SJC_S000404 | NA     | NA     | NA | Sjp_0046320.1 | NA                                            | NA       |
| unknown     | NA    | NA       | NA       | SJC_S000405 | NA     | NA     | NA | Sjp_0046330.1 | cell part                                     | 0.009037 |
| unknown     | NA    | NA       | NA       | SJC_S000405 | NA     | NA     | NA | Sjp_0046340.1 | cell part                                     | 0.009037 |
| HSB10kb_630 | 4     | 25238680 | 25357853 | SJC_S000405 | 172489 | 264511 | +  | Sjp_0046350.1 | NA                                            | NA       |
| HSB10kb_630 | 4     | 25238680 | 25357853 | SJC_S000405 | 172489 | 264511 | +  | Sjp_0046360.1 | cell part                                     | 0.009037 |
| HSB10kb_630 | 4     | 25238680 | 25357853 | SJC_S000405 | 172489 | 264511 | +  | Sjp_0046370.1 | catalytic activity                            | 0.035844 |
| HSB10kb_631 | 4     | 17778558 | 17889651 | SJC_S000406 | 25861  | 172158 | -  | Sjp_0046380.1 | biological regulation                         | 0.76396  |
| HSB10kb_631 | 4     | 17778558 | 17889651 | SJC_S000406 | 25861  | 172158 | -  | Sjp_0046390.1 | NA                                            | NA       |
| HSB10kb_631 | 4     | 17778558 | 17889651 | SJC_S000406 | 25861  | 172158 | -  | Sjp_0046400.1 | transporter activity                          | 0.782    |
| HSB10kb_631 | 4     | 17778558 | 17889651 | SJC_S000406 | 25861  | 172158 | -  | Sjp_0046410.1 | NA                                            | NA       |
| EBR10kb_352 | "4,4" | NA       | NA       | SJC_S000406 | 172159 | 172171 | NA | Sjp_0046410.1 | NA                                            | NA       |
| HSB10kb_632 | 4     | 17734252 | 17765162 | SJC_S000406 | 172172 | 204824 | +  | Sjp_0046410.1 | NA                                            | NA       |
| HSB10kb_632 | 4     | 17734252 | 17765162 | SJC_S000406 | 172172 | 204824 | +  | Sjp_0046420.1 | NA                                            | NA       |
| EBR10kb_353 | "4,4" | NA       | NA       | SJC_S000406 | 204825 | 217398 | NA | Sjp_0046430.1 | NA                                            | NA       |
| EBR10kb_353 | "4,4" | NA       | NA       | SJC_S000406 | 204825 | 217398 | NA | Sjp_0046440.1 | catalytic activity                            | 0.035844 |
| HSB10kb_633 | 4     | 17626172 | 17713384 | SJC_S000406 | 217399 | 277727 | -  | Sjp_0046440.1 | catalytic activity                            | 0.035844 |
| HSB10kb_633 | 4     | 17626172 | 17713384 | SJC_S000406 | 217399 | 277727 | -  | Sjp_0046450.1 | binding                                       | 0.052762 |

|             |    |          |          |             |        |        |    |               |                       |          |
|-------------|----|----------|----------|-------------|--------|--------|----|---------------|-----------------------|----------|
| HSB10kb_633 | 4  | 17626172 | 17713384 | SJC_S000406 | 217399 | 277727 | -  | Sjp_0046460.1 | catalytic activity    | 0.035844 |
| HSB10kb_633 | 4  | 17626172 | 17713384 | SJC_S000406 | 217399 | 277727 | -  | Sjp_0046470.1 | NA                    | NA       |
| unknown     | NA | NA       | NA       | SJC_S000407 | NA     | NA     | NA | Sjp_0046480.1 | NA                    | NA       |
| unknown     | NA | NA       | NA       | SJC_S000407 | NA     | NA     | NA | Sjp_0046490.1 | catalytic activity    | 0.035844 |
| unknown     | NA | NA       | NA       | SJC_S000407 | NA     | NA     | NA | Sjp_0046500.1 | NA                    | NA       |
| unknown     | NA | NA       | NA       | SJC_S000407 | NA     | NA     | NA | Sjp_0046510.1 | NA                    | NA       |
| unknown     | NA | NA       | NA       | SJC_S000408 | NA     | NA     | NA | Sjp_0046520.1 | NA                    | NA       |
| unknown     | NA | NA       | NA       | SJC_S000408 | NA     | NA     | NA | Sjp_0046530.1 | NA                    | NA       |
| unknown     | NA | NA       | NA       | SJC_S000408 | NA     | NA     | NA | Sjp_0046540.1 | biological regulation | 0.76396  |
| unknown     | NA | NA       | NA       | SJC_S000408 | NA     | NA     | NA | Sjp_0046550.1 | NA                    | NA       |
| unknown     | NA | NA       | NA       | SJC_S000408 | NA     | NA     | NA | Sjp_0046560.1 | catalytic activity    | 0.035844 |
| unknown     | NA | NA       | NA       | SJC_S000408 | NA     | NA     | NA | Sjp_0046570.1 | NA                    | NA       |
| HSB10kb_634 | 1  | 15878201 | 16190801 | SJC_S000409 | 1108   | 247208 | +  | Sjp_0046580.1 | NA                    | NA       |
| HSB10kb_634 | 1  | 15878201 | 16190801 | SJC_S000409 | 1108   | 247208 | +  | Sjp_0046590.1 | NA                    | NA       |
| HSB10kb_634 | 1  | 15878201 | 16190801 | SJC_S000409 | 1108   | 247208 | +  | Sjp_0046600.1 | catalytic activity    | 0.035844 |
| HSB10kb_634 | 1  | 15878201 | 16190801 | SJC_S000409 | 1108   | 247208 | +  | Sjp_0046610.1 | NA                    | NA       |
| HSB10kb_634 | 1  | 15878201 | 16190801 | SJC_S000409 | 1108   | 247208 | +  | Sjp_0046620.1 | catalytic activity    | 0.035844 |
| HSB10kb_634 | 1  | 15878201 | 16190801 | SJC_S000409 | 1108   | 247208 | +  | Sjp_0046630.1 | NA                    | NA       |
| unknown     | NA | NA       | NA       | SJC_S000410 | NA     | NA     | NA | Sjp_0046640.1 | NA                    | NA       |
| unknown     | NA | NA       | NA       | SJC_S000410 | NA     | NA     | NA | Sjp_0046650.1 | catalytic activity    | 0.035844 |
| unknown     | NA | NA       | NA       | SJC_S000411 | NA     | NA     | NA | Sjp_0046660.1 | NA                    | NA       |
| unknown     | NA | NA       | NA       | SJC_S000411 | NA     | NA     | NA | Sjp_0046670.1 | NA                    | NA       |
| unknown     | NA | NA       | NA       | SJC_S000411 | NA     | NA     | NA | Sjp_0046680.1 | NA                    | NA       |
| unknown     | NA | NA       | NA       | SJC_S000411 | NA     | NA     | NA | Sjp_0046690.1 | NA                    | NA       |
| HSB10kb_635 | 2  | 32630440 | 32774492 | SJC_S000412 | 101008 | 254795 | -  | Sjp_0046700.1 | NA                    | NA       |
| HSB10kb_635 | 2  | 32630440 | 32774492 | SJC_S000412 | 101008 | 254795 | -  | Sjp_0046710.1 | binding               | 0.052762 |
| HSB10kb_635 | 2  | 32630440 | 32774492 | SJC_S000412 | 101008 | 254795 | -  | Sjp_0046720.1 | cell part             | 0.009037 |
| HSB10kb_635 | 2  | 32630440 | 32774492 | SJC_S000412 | 101008 | 254795 | -  | Sjp_0046730.1 | NA                    | NA       |
| HSB10kb_635 | 2  | 32630440 | 32774492 | SJC_S000412 | 101008 | 254795 | -  | Sjp_0046740.1 | NA                    | NA       |
| HSB10kb_635 | 2  | 32630440 | 32774492 | SJC_S000412 | 101008 | 254795 | -  | Sjp_0046750.1 | catalytic activity    | 0.035844 |
| HSB10kb_635 | 2  | 32630440 | 32774492 | SJC_S000412 | 101008 | 254795 | -  | Sjp_0046760.1 | biological regulation | 0.76396  |
| HSB10kb_635 | 2  | 32630440 | 32774492 | SJC_S000412 | 101008 | 254795 | -  | Sjp_0046770.1 | catalytic activity    | 0.035844 |

|             |       |          |          |             |        |        |    |               |                                  |          |
|-------------|-------|----------|----------|-------------|--------|--------|----|---------------|----------------------------------|----------|
| EBR10kb_354 | "2,2" | NA       | NA       | SJC_S000412 | 254796 | 281400 | NA | Sjp_0046780.1 | NA                               | NA       |
| HSB10kb_636 | 2     | 32551450 | 32618584 | SJC_S000412 | 281401 | 361995 | +  | Sjp_0046790.1 | NA                               | NA       |
| EBR10kb_355 | "2,2" | NA       | NA       | SJC_S000412 | 361996 | 383223 | NA | Sjp_0046800.1 | binding                          | 0.052762 |
| HSB10kb_637 | 2     | 32419582 | 32522495 | SJC_S000412 | 383224 | 458135 | -  | Sjp_0046800.1 | binding                          | 0.052762 |
| HSB10kb_637 | 2     | 32419582 | 32522495 | SJC_S000412 | 383224 | 458135 | -  | Sjp_0046810.1 | transcription regulator activity | NA       |
| HSB10kb_637 | 2     | 32419582 | 32522495 | SJC_S000412 | 383224 | 458135 | -  | Sjp_0046820.1 | NA                               | NA       |
| HSB10kb_637 | 2     | 32419582 | 32522495 | SJC_S000412 | 383224 | 458135 | -  | Sjp_0046830.1 | NA                               | NA       |
| unknown     | NA    | NA       | NA       | SJC_S000413 | NA     | NA     | NA | Sjp_0046840.1 | NA                               | NA       |
| HSB10kb_638 | 3     | 6686744  | 6868403  | SJC_S000413 | 132097 | 297428 | +  | Sjp_0046850.1 | NA                               | NA       |
| HSB10kb_638 | 3     | 6686744  | 6868403  | SJC_S000413 | 132097 | 297428 | +  | Sjp_0046860.1 | binding                          | 0.052762 |
| HSB10kb_638 | 3     | 6686744  | 6868403  | SJC_S000413 | 132097 | 297428 | +  | Sjp_0046870.1 | NA                               | NA       |
| HSB10kb_638 | 3     | 6686744  | 6868403  | SJC_S000413 | 132097 | 297428 | +  | Sjp_0046880.1 | molecular transducer activity    | 0.50162  |
| HSB10kb_638 | 3     | 6686744  | 6868403  | SJC_S000413 | 132097 | 297428 | +  | Sjp_0046890.1 | NA                               | NA       |
| HSB10kb_638 | 3     | 6686744  | 6868403  | SJC_S000413 | 132097 | 297428 | +  | Sjp_0046900.1 | transporter activity             | 0.782    |
| HSB10kb_638 | 3     | 6686744  | 6868403  | SJC_S000413 | 132097 | 297428 | +  | Sjp_0046910.1 | transcription regulator activity | NA       |
| HSB10kb_638 | 3     | 6686744  | 6868403  | SJC_S000413 | 132097 | 297428 | +  | Sjp_0046920.1 | catalytic activity               | 0.035844 |
| HSB10kb_638 | 3     | 6686744  | 6868403  | SJC_S000413 | 132097 | 297428 | +  | Sjp_0046930.1 | catalytic activity               | 0.035844 |
| HSB10kb_639 | 1     | 55255040 | 55540869 | SJC_S000414 | 28509  | 303174 | -  | Sjp_0046940.1 | NA                               | NA       |
| HSB10kb_639 | 1     | 55255040 | 55540869 | SJC_S000414 | 28509  | 303174 | -  | Sjp_0046950.1 | developmental process            | NA       |
| HSB10kb_639 | 1     | 55255040 | 55540869 | SJC_S000414 | 28509  | 303174 | -  | Sjp_0046960.1 | response to stimulus             | NA       |
| HSB10kb_639 | 1     | 55255040 | 55540869 | SJC_S000414 | 28509  | 303174 | -  | Sjp_0046970.1 | NA                               | NA       |
| HSB10kb_639 | 1     | 55255040 | 55540869 | SJC_S000414 | 28509  | 303174 | -  | Sjp_0046980.1 | cell part                        | 0.009037 |
| HSB10kb_639 | 1     | 55255040 | 55540869 | SJC_S000414 | 28509  | 303174 | -  | Sjp_0046990.1 | cell part                        | 0.009037 |
| HSB10kb_639 | 1     | 55255040 | 55540869 | SJC_S000414 | 28509  | 303174 | -  | Sjp_0047000.1 | cell part                        | 0.009037 |
| HSB10kb_639 | 1     | 55255040 | 55540869 | SJC_S000414 | 28509  | 303174 | -  | Sjp_0047010.1 | NA                               | NA       |

|             |       |          |          |             |        |        |    |               |                           |          |
|-------------|-------|----------|----------|-------------|--------|--------|----|---------------|---------------------------|----------|
| HSB10kb_639 | 1     | 55255040 | 55540869 | SJC_S000414 | 28509  | 303174 | -  | Sjp_0047020.1 | NA                        | NA       |
| HSB10kb_639 | 1     | 55255040 | 55540869 | SJC_S000414 | 28509  | 303174 | -  | Sjp_0047030.1 | NA                        | NA       |
| HSB10kb_639 | 1     | 55255040 | 55540869 | SJC_S000414 | 28509  | 303174 | -  | Sjp_0047040.1 | NA                        | NA       |
| HSB10kb_639 | 1     | 55255040 | 55540869 | SJC_S000414 | 28509  | 303174 | -  | Sjp_0047050.1 | NA                        | NA       |
| HSB10kb_639 | 1     | 55255040 | 55540869 | SJC_S000414 | 28509  | 303174 | -  | Sjp_0047060.1 | NA                        | NA       |
| HSB10kb_639 | 1     | 55255040 | 55540869 | SJC_S000414 | 28509  | 303174 | -  | Sjp_0047070.1 | enzyme regulator activity | 0.1755   |
| unknown     | NA    | NA       | NA       | SJC_S000414 | NA     | NA     | NA | Sjp_0047080.1 | NA                        | NA       |
| unknown     | NA    | NA       | NA       | SJC_S000414 | NA     | NA     | NA | Sjp_0047090.1 | NA                        | NA       |
| unknown     | NA    | NA       | NA       | SJC_S000415 | NA     | NA     | NA | Sjp_0047100.1 | NA                        | NA       |
| unknown     | NA    | NA       | NA       | SJC_S000415 | NA     | NA     | NA | Sjp_0047110.1 | NA                        | NA       |
| unknown     | NA    | NA       | NA       | SJC_S000415 | NA     | NA     | NA | Sjp_0047120.1 | NA                        | NA       |
| unknown     | NA    | NA       | NA       | SJC_S000415 | NA     | NA     | NA | Sjp_0047130.1 | NA                        | NA       |
| unknown     | NA    | NA       | NA       | SJC_S000415 | NA     | NA     | NA | Sjp_0047140.1 | biological regulation     | 0.76396  |
| unknown     | NA    | NA       | NA       | SJC_S000415 | NA     | NA     | NA | Sjp_0047150.1 | transporter activity      | 0.782    |
| unknown     | NA    | NA       | NA       | SJC_S000415 | NA     | NA     | NA | Sjp_0047160.1 | NA                        | NA       |
| unknown     | NA    | NA       | NA       | SJC_S000416 | NA     | NA     | NA | Sjp_0047170.1 | catalytic activity        | 0.035844 |
| HSB10kb_640 | 1     | 55823917 | 55988325 | SJC_S000416 | 94375  | 231264 | -  | Sjp_0047180.1 | NA                        | NA       |
| HSB10kb_640 | 1     | 55823917 | 55988325 | SJC_S000416 | 94375  | 231264 | -  | Sjp_0047190.1 | NA                        | NA       |
| HSB10kb_640 | 1     | 55823917 | 55988325 | SJC_S000416 | 94375  | 231264 | -  | Sjp_0047200.1 | NA                        | NA       |
| HSB10kb_640 | 1     | 55823917 | 55988325 | SJC_S000416 | 94375  | 231264 | -  | Sjp_0047210.1 | NA                        | NA       |
| HSB10kb_640 | 1     | 55823917 | 55988325 | SJC_S000416 | 94375  | 231264 | -  | Sjp_0047220.1 | NA                        | NA       |
| EBR10kb_356 | "1,1" | NA       | NA       | SJC_S000416 | 231265 | 235009 | NA | Sjp_0047220.1 | NA                        | NA       |
| HSB10kb_641 | 1     | 55761297 | 55787737 | SJC_S000416 | 235010 | 258548 | -  | Sjp_0047220.1 | NA                        | NA       |
| EBR10kb_357 | "1,1" | NA       | NA       | SJC_S000416 | 258549 | 294364 | NA | Sjp_0047220.1 | NA                        | NA       |
| EBR10kb_357 | "1,1" | NA       | NA       | SJC_S000416 | 258549 | 294364 | NA | Sjp_0047230.1 | NA                        | NA       |
| HSB10kb_642 | 1     | 55791335 | 55820580 | SJC_S000416 | 294365 | 305607 | -  | Sjp_0047230.1 | NA                        | NA       |
| HSB10kb_642 | 1     | 55791335 | 55820580 | SJC_S000416 | 294365 | 305607 | -  | Sjp_0047240.1 | transporter activity      | 0.782    |
| HSB10kb_643 | 1     | 30034583 | 30291991 | SJC_S000417 | 6593   | 204720 | -  | Sjp_0047250.1 | NA                        | NA       |
| HSB10kb_643 | 1     | 30034583 | 30291991 | SJC_S000417 | 6593   | 204720 | -  | Sjp_0047270.1 | NA                        | NA       |

|             |       |          |          |             |        |        |    |               |                       |          |
|-------------|-------|----------|----------|-------------|--------|--------|----|---------------|-----------------------|----------|
| HSB10kb_643 | 1     | 30034583 | 30291991 | SJC_S000417 | 6593   | 204720 | -  | Sjp_0047280.1 | biological regulation | 0.76396  |
| HSB10kb_643 | 1     | 30034583 | 30291991 | SJC_S000417 | 6593   | 204720 | -  | Sjp_0047290.1 | NA                    | NA       |
| HSB10kb_643 | 1     | 30034583 | 30291991 | SJC_S000417 | 6593   | 204720 | -  | Sjp_0047310.1 | biological regulation | 0.76396  |
| HSB10kb_643 | 1     | 30034583 | 30291991 | SJC_S000417 | 6593   | 204720 | -  | Sjp_0047320.1 | NA                    | NA       |
| HSB10kb_643 | 1     | 30034583 | 30291991 | SJC_S000417 | 6593   | 204720 | -  | Sjp_0047330.1 | NA                    | NA       |
| HSB10kb_643 | 1     | 30034583 | 30291991 | SJC_S000417 | 6593   | 204720 | -  | Sjp_0047340.1 | NA                    | NA       |
| HSB10kb_643 | 1     | 30034583 | 30291991 | SJC_S000417 | 6593   | 204720 | -  | Sjp_0047350.1 | catalytic activity    | 0.035844 |
| unknown     | NA    | NA       | NA       | SJC_S000417 | NA     | NA     | NA | Sjp_0047360.1 | catalytic activity    | 0.035844 |
| unknown     | NA    | NA       | NA       | SJC_S000417 | NA     | NA     | NA | Sjp_0047370.1 | NA                    | NA       |
| unknown     | NA    | NA       | NA       | SJC_S000418 | NA     | NA     | NA | Sjp_0047380.1 | NA                    | NA       |
| unknown     | NA    | NA       | NA       | SJC_S000418 | NA     | NA     | NA | Sjp_0047390.1 | NA                    | NA       |
| unknown     | NA    | NA       | NA       | SJC_S000418 | NA     | NA     | NA | Sjp_0047400.1 | NA                    | NA       |
| unknown     | NA    | NA       | NA       | SJC_S000419 | NA     | NA     | NA | Sjp_0047410.1 | NA                    | NA       |
| unknown     | NA    | NA       | NA       | SJC_S000419 | NA     | NA     | NA | Sjp_0047420.1 | NA                    | NA       |
| HSB10kb_644 | 5     | 4246755  | 4264354  | SJC_S000419 | 178814 | 197631 | +  | Sjp_0047430.1 | NA                    | NA       |
| HSB10kb_644 | 5     | 4246755  | 4264354  | SJC_S000419 | 178814 | 197631 | +  | Sjp_0047440.1 | NA                    | NA       |
| EBR10kb_358 | "5,5" | NA       | NA       | SJC_S000419 | 197632 | 224792 | NA | Sjp_0047440.1 | NA                    | NA       |
| EBR10kb_358 | "5,5" | NA       | NA       | SJC_S000419 | 197632 | 224792 | NA | Sjp_0047450.1 | NA                    | NA       |
| HSB10kb_645 | 5     | 3698342  | 3890096  | SJC_S000419 | 224793 | 439721 | -  | Sjp_0047460.1 | NA                    | NA       |
| HSB10kb_645 | 5     | 3698342  | 3890096  | SJC_S000419 | 224793 | 439721 | -  | Sjp_0047470.1 | response to stimulus  | NA       |
| HSB10kb_645 | 5     | 3698342  | 3890096  | SJC_S000419 | 224793 | 439721 | -  | Sjp_0047480.1 | NA                    | NA       |
| HSB10kb_645 | 5     | 3698342  | 3890096  | SJC_S000419 | 224793 | 439721 | -  | Sjp_0047490.1 | binding               | 0.052762 |
| HSB10kb_645 | 5     | 3698342  | 3890096  | SJC_S000419 | 224793 | 439721 | -  | Sjp_0047500.1 | biological regulation | 0.76396  |
| HSB10kb_645 | 5     | 3698342  | 3890096  | SJC_S000419 | 224793 | 439721 | -  | Sjp_0047510.1 | NA                    | NA       |
| EBR10kb_359 | "5,5" | NA       | NA       | SJC_S000419 | 439722 | 462688 | NA | Sjp_0047520.1 | cell part             | 0.009037 |
| HSB10kb_646 | 5     | 4142681  | 4230324  | SJC_S000419 | 462689 | 544648 | +  | Sjp_0047530.1 | NA                    | NA       |
| HSB10kb_646 | 5     | 4142681  | 4230324  | SJC_S000419 | 462689 | 544648 | +  | Sjp_0047540.1 | NA                    | NA       |
| unknown     | NA    | NA       | NA       | SJC_S000420 | NA     | NA     | NA | Sjp_0047550.1 | NA                    | NA       |
| unknown     | NA    | NA       | NA       | SJC_S000420 | NA     | NA     | NA | Sjp_0047560.1 | catalytic activity    | 0.035844 |
| unknown     | NA    | NA       | NA       | SJC_S000420 | NA     | NA     | NA | Sjp_0047570.1 | catalytic activity    | 0.035844 |

|             |       |         |         |             |        |        |    |               |                       |          |
|-------------|-------|---------|---------|-------------|--------|--------|----|---------------|-----------------------|----------|
| unknown     | NA    | NA      | NA      | SJC_S000420 | NA     | NA     | NA | Sjp_0047580.1 | biological regulation | 0.76396  |
| unknown     | NA    | NA      | NA      | SJC_S000420 | NA     | NA     | NA | Sjp_0047590.1 | NA                    | NA       |
| HSB10kb_647 | 5     | 3467070 | 3489776 | SJC_S000420 | 148308 | 190156 | -  | Sjp_0047600.1 | NA                    | NA       |
| HSB10kb_647 | 5     | 3467070 | 3489776 | SJC_S000420 | 148308 | 190156 | -  | Sjp_0047610.1 | cell part             | 0.009037 |
| EBR10kb_360 | "5,5" | NA      | NA      | SJC_S000420 | 190157 | 197083 | NA | Sjp_0047610.1 | cell part             | 0.009037 |
| HSB10kb_648 | 5     | 8661505 | 8788972 | SJC_S000420 | 197084 | 319683 | +  | Sjp_0047610.1 | cell part             | 0.009037 |
| HSB10kb_648 | 5     | 8661505 | 8788972 | SJC_S000420 | 197084 | 319683 | +  | Sjp_0047620.1 | NA                    | NA       |
| HSB10kb_648 | 5     | 8661505 | 8788972 | SJC_S000420 | 197084 | 319683 | +  | Sjp_0047640.1 | NA                    | NA       |
| HSB10kb_648 | 5     | 8661505 | 8788972 | SJC_S000420 | 197084 | 319683 | +  | Sjp_0047650.1 | binding               | 0.052762 |
| unknown     | NA    | NA      | NA      | SJC_S000420 | NA     | NA     | NA | Sjp_0047660.1 | NA                    | NA       |
| unknown     | NA    | NA      | NA      | SJC_S000420 | NA     | NA     | NA | Sjp_0047670.1 | metabolic process     | 0.41934  |
| unknown     | NA    | NA      | NA      | SJC_S000420 | NA     | NA     | NA | Sjp_0047680.1 | transporter activity  | 0.782    |
| unknown     | NA    | NA      | NA      | SJC_S000421 | NA     | NA     | NA | Sjp_0047690.1 | NA                    | NA       |
| HSB10kb_649 | 2     | 3925971 | 4106486 | SJC_S000422 | 2456   | 130959 | +  | Sjp_0047700.1 | NA                    | NA       |
| HSB10kb_649 | 2     | 3925971 | 4106486 | SJC_S000422 | 2456   | 130959 | +  | Sjp_0047710.1 | NA                    | NA       |
| HSB10kb_649 | 2     | 3925971 | 4106486 | SJC_S000422 | 2456   | 130959 | +  | Sjp_0047720.1 | NA                    | NA       |
| HSB10kb_649 | 2     | 3925971 | 4106486 | SJC_S000422 | 2456   | 130959 | +  | Sjp_0047730.1 | NA                    | NA       |
| unknown     | NA    | NA      | NA      | SJC_S000422 | NA     | NA     | NA | Sjp_0047740.1 | NA                    | NA       |
| unknown     | NA    | NA      | NA      | SJC_S000423 | NA     | NA     | NA | Sjp_0047750.1 | cell part             | 0.009037 |
| HSB10kb_650 | 3     | 1092765 | 1136268 | SJC_S000423 | 244139 | 290441 | +  | Sjp_0047760.1 | NA                    | NA       |
| HSB10kb_650 | 3     | 1092765 | 1136268 | SJC_S000423 | 244139 | 290441 | +  | Sjp_0047770.1 | NA                    | NA       |
| HSB10kb_650 | 3     | 1092765 | 1136268 | SJC_S000423 | 244139 | 290441 | +  | Sjp_0047780.1 | NA                    | NA       |
| EBR10kb_361 | "3,3" | NA      | NA      | SJC_S000423 | 290442 | 294484 | NA | Sjp_0047790.1 | cellular process      | 0.63852  |
| HSB10kb_651 | 3     | 1144682 | 1158615 | SJC_S000423 | 294485 | 309244 | -  | Sjp_0047790.1 | cellular process      | 0.63852  |
| HSB10kb_651 | 3     | 1144682 | 1158615 | SJC_S000423 | 294485 | 309244 | -  | Sjp_0047800.1 | NA                    | NA       |
| HSB10kb_652 | 5     | 5832705 | 5929764 | SJC_S000424 | 1904   | 60230  | +  | Sjp_0047810.1 | NA                    | NA       |
| HSB10kb_652 | 5     | 5832705 | 5929764 | SJC_S000424 | 1904   | 60230  | +  | Sjp_0047820.1 | biological regulation | 0.76396  |
| unknown     | NA    | NA      | NA      | SJC_S000424 | NA     | NA     | NA | Sjp_0047830.1 | catalytic activity    | 0.035844 |
| unknown     | NA    | NA      | NA      | SJC_S000425 | NA     | NA     | NA | Sjp_0047840.1 | response to stimulus  | NA       |

|             |    |          |          |             |       |        |    |               |                               |          |
|-------------|----|----------|----------|-------------|-------|--------|----|---------------|-------------------------------|----------|
| unknown     | NA | NA       | NA       | SJC_S000425 | NA    | NA     | NA | Sjp_0047850.1 | catalytic activity            | 0.035844 |
| unknown     | NA | NA       | NA       | SJC_S000425 | NA    | NA     | NA | Sjp_0047860.1 | NA                            | NA       |
| unknown     | NA | NA       | NA       | SJC_S000425 | NA    | NA     | NA | Sjp_0047870.1 | NA                            | NA       |
| HSB10kb_653 | WZ | 12085483 | 12102482 | SJC_S000427 | 2448  | 35000  | +  | Sjp_0047880.1 | NA                            | NA       |
| HSB10kb_653 | WZ | 12085483 | 12102482 | SJC_S000427 | 2448  | 35000  | +  | Sjp_0047890.1 | NA                            | NA       |
| HSB10kb_653 | WZ | 12085483 | 12102482 | SJC_S000427 | 2448  | 35000  | +  | Sjp_0047900.1 | NA                            | NA       |
| unknown     | NA | NA       | NA       | SJC_S000427 | NA    | NA     | NA | Sjp_0047920.1 | developmental process         | NA       |
| unknown     | NA | NA       | NA       | SJC_S000427 | NA    | NA     | NA | Sjp_0047930.1 | NA                            | NA       |
| unknown     | NA | NA       | NA       | SJC_S000428 | NA    | NA     | NA | Sjp_0047940.1 | binding                       | 0.052762 |
| HSB10kb_654 | 2  | 13211307 | 13489469 | SJC_S000429 | 17996 | 240664 | -  | Sjp_0047950.1 | binding                       | 0.052762 |
| HSB10kb_654 | 2  | 13211307 | 13489469 | SJC_S000429 | 17996 | 240664 | -  | Sjp_0047960.1 | NA                            | NA       |
| HSB10kb_654 | 2  | 13211307 | 13489469 | SJC_S000429 | 17996 | 240664 | -  | Sjp_0047970.1 | NA                            | NA       |
| HSB10kb_654 | 2  | 13211307 | 13489469 | SJC_S000429 | 17996 | 240664 | -  | Sjp_0047980.1 | NA                            | NA       |
| HSB10kb_654 | 2  | 13211307 | 13489469 | SJC_S000429 | 17996 | 240664 | -  | Sjp_0047990.1 | NA                            | NA       |
| HSB10kb_654 | 2  | 13211307 | 13489469 | SJC_S000429 | 17996 | 240664 | -  | Sjp_0048000.1 | NA                            | NA       |
| HSB10kb_654 | 2  | 13211307 | 13489469 | SJC_S000429 | 17996 | 240664 | -  | Sjp_0048010.1 | binding                       | 0.052762 |
| HSB10kb_654 | 2  | 13211307 | 13489469 | SJC_S000429 | 17996 | 240664 | -  | Sjp_0048020.1 | NA                            | NA       |
| HSB10kb_654 | 2  | 13211307 | 13489469 | SJC_S000429 | 17996 | 240664 | -  | Sjp_0048030.1 | NA                            | NA       |
| unknown     | NA | NA       | NA       | SJC_S000430 | NA    | NA     | NA | Sjp_0048040.1 | cell part                     | 0.009037 |
| unknown     | NA | NA       | NA       | SJC_S000430 | NA    | NA     | NA | Sjp_0048050.1 | catalytic activity            | 0.035844 |
| unknown     | NA | NA       | NA       | SJC_S000430 | NA    | NA     | NA | Sjp_0048060.1 | biological regulation         | 0.76396  |
| unknown     | NA | NA       | NA       | SJC_S000430 | NA    | NA     | NA | Sjp_0048070.1 | NA                            | NA       |
| unknown     | NA | NA       | NA       | SJC_S000430 | NA    | NA     | NA | Sjp_0048080.1 | establishment of localization | NA       |
| unknown     | NA | NA       | NA       | SJC_S000430 | NA    | NA     | NA | Sjp_0048090.1 | NA                            | NA       |
| unknown     | NA | NA       | NA       | SJC_S000430 | NA    | NA     | NA | Sjp_0048100.1 | NA                            | NA       |
| unknown     | NA | NA       | NA       | SJC_S000430 | NA    | NA     | NA | Sjp_0048110.1 | NA                            | NA       |
| unknown     | NA | NA       | NA       | SJC_S000430 | NA    | NA     | NA | Sjp_0048120.1 | binding                       | 0.052762 |
| unknown     | NA | NA       | NA       | SJC_S000431 | NA    | NA     | NA | Sjp_0048130.1 | NA                            | NA       |
| HSB10kb_655 | 3  | 23076589 | 23135780 | SJC_S000431 | 91999 | 135320 | -  | Sjp_0048140.1 | NA                            | NA       |
| HSB10kb_655 | 3  | 23076589 | 23135780 | SJC_S000431 | 91999 | 135320 | -  | Sjp_0048150.1 | NA                            | NA       |
| unknown     | NA | NA       | NA       | SJC_S000431 | NA    | NA     | NA | Sjp_0048160.1 | NA                            | NA       |



|             |       |          |          |             |        |        |    |               |                                               |          |
|-------------|-------|----------|----------|-------------|--------|--------|----|---------------|-----------------------------------------------|----------|
| unknown     | NA    | NA       | NA       | SJC_S000431 | NA     | NA     | NA | Sjp_0048170.1 | catalytic activity                            | 0.035844 |
| unknown     | NA    | NA       | NA       | SJC_S000432 | NA     | NA     | NA | Sjp_0048180.1 | NA                                            | NA       |
| unknown     | NA    | NA       | NA       | SJC_S000432 | NA     | NA     | NA | Sjp_0048190.1 | NA                                            | NA       |
| unknown     | NA    | NA       | NA       | SJC_S000432 | NA     | NA     | NA | Sjp_0048200.1 | NA                                            | NA       |
| unknown     | NA    | NA       | NA       | SJC_S000432 | NA     | NA     | NA | Sjp_0048210.1 | NA                                            | NA       |
| unknown     | NA    | NA       | NA       | SJC_S000432 | NA     | NA     | NA | Sjp_0048220.1 | NA                                            | NA       |
| HSB10kb_656 | 1     | 42549248 | 42591810 | SJC_S000432 | 177006 | 195627 | -  | Sjp_0048230.1 | developmental process                         | NA       |
| HSB10kb_656 | 1     | 42549248 | 42591810 | SJC_S000432 | 177006 | 195627 | -  | Sjp_0048240.1 | cell part                                     | 0.009037 |
| unknown     | NA    | NA       | NA       | SJC_S000432 | NA     | NA     | NA | Sjp_0048250.1 | NA                                            | NA       |
| unknown     | NA    | NA       | NA       | SJC_S000432 | NA     | NA     | NA | Sjp_0048260.1 | NA                                            | NA       |
| unknown     | NA    | NA       | NA       | SJC_S000432 | NA     | NA     | NA | Sjp_0048270.1 | cell part                                     | 0.009037 |
| HSB10kb_657 | 1     | 33759232 | 33800685 | SJC_S000433 | 19211  | 53843  | -  | Sjp_0048280.1 | cellular component organization or biogenesis | NA       |
| EBR10kb_362 | "1,1" | NA       | NA       | SJC_S000433 | 53844  | 112699 | NA | NA            | NA                                            | NA       |
| HSB10kb_658 | 1     | 35560680 | 35596958 | SJC_S000433 | 112700 | 152721 | +  | Sjp_0048290.1 | NA                                            | NA       |
| HSB10kb_658 | 1     | 35560680 | 35596958 | SJC_S000433 | 112700 | 152721 | +  | Sjp_0048300.1 | NA                                            | NA       |
| HSB10kb_658 | 1     | 35560680 | 35596958 | SJC_S000433 | 112700 | 152721 | +  | Sjp_0048310.1 | cell part                                     | 0.009037 |
| unknown     | NA    | NA       | NA       | SJC_S000433 | NA     | NA     | NA | Sjp_0048320.1 | catalytic activity                            | 0.035844 |
| unknown     | NA    | NA       | NA       | SJC_S000433 | NA     | NA     | NA | Sjp_0048330.1 | catalytic activity                            | 0.035844 |
| unknown     | NA    | NA       | NA       | SJC_S000433 | NA     | NA     | NA | Sjp_0048340.1 | catalytic activity                            | 0.035844 |
| unknown     | NA    | NA       | NA       | SJC_S000433 | NA     | NA     | NA | Sjp_0048350.1 | NA                                            | NA       |
| unknown     | NA    | NA       | NA       | SJC_S000434 | NA     | NA     | NA | Sjp_0048360.1 | cellular process                              | 0.63852  |
| HSB10kb_659 | 4     | 15354908 | 15422369 | SJC_S000434 | 19899  | 98771  | +  | Sjp_0048370.1 | cellular process                              | 0.63852  |
| HSB10kb_659 | 4     | 15354908 | 15422369 | SJC_S000434 | 19899  | 98771  | +  | Sjp_0048380.1 | binding                                       | 0.052762 |
| EBR10kb_363 | "4,2" | NA       | NA       | SJC_S000434 | 98772  | 112891 | NA | Sjp_0048380.1 | binding                                       | 0.052762 |
| HSB10kb_660 | 2     | 9195333  | 9222836  | SJC_S000434 | 112892 | 128082 |    | NA            | NA                                            | NA       |
| unknown     | NA    | NA       | NA       | SJC_S000435 | NA     | NA     | NA | Sjp_0048390.1 | NA                                            | NA       |
| HSB10kb_661 | 1     | 44502823 | 44597987 | SJC_S000435 | 23405  | 102147 | +  | Sjp_0048400.1 | biological regulation                         | 0.76396  |
| HSB10kb_661 | 1     | 44502823 | 44597987 | SJC_S000435 | 23405  | 102147 | +  | Sjp_0048410.1 | NA                                            | NA       |
| HSB10kb_661 | 1     | 44502823 | 44597987 | SJC_S000435 | 23405  | 102147 | +  | Sjp_0048420.1 | NA                                            | NA       |

|             |         |          |          |             |       |        |    |               |                       |          |
|-------------|---------|----------|----------|-------------|-------|--------|----|---------------|-----------------------|----------|
| HSB10kb_661 | 1       | 44502823 | 44597987 | SJC_S000435 | 23405 | 102147 | +  | Sjp_0048430.1 | NA                    | NA       |
| unknown     | NA      | NA       | NA       | SJC_S000435 | NA    | NA     | NA | Sjp_0048440.1 | NA                    | NA       |
| unknown     | NA      | NA       | NA       | SJC_S000436 | NA    | NA     | NA | Sjp_0048450.1 | biological regulation | 0.76396  |
| unknown     | NA      | NA       | NA       | SJC_S000436 | NA    | NA     | NA | Sjp_0048460.1 | binding               | 0.052762 |
| unknown     | NA      | NA       | NA       | SJC_S000436 | NA    | NA     | NA | Sjp_0048470.1 | NA                    | NA       |
| HSB10kb_662 | 2       | 9418754  | 9539583  | SJC_S000436 | 61659 | 128390 | -  | Sjp_0048480.1 | NA                    | NA       |
| HSB10kb_662 | 2       | 9418754  | 9539583  | SJC_S000436 | 61659 | 128390 | -  | Sjp_0048490.1 | NA                    | NA       |
| HSB10kb_662 | 2       | 9418754  | 9539583  | SJC_S000436 | 61659 | 128390 | -  | Sjp_0048500.1 | biological regulation | 0.76396  |
| HSB10kb_663 | WZ      | 24312842 | 24357864 | SJC_S000437 | 20690 | 71445  |    | Sjp_0048510.1 | transporter activity  | 0.782    |
| unknown     | NA      | NA       | NA       | SJC_S000437 | NA    | NA     | NA | Sjp_0048520.1 | NA                    | NA       |
| unknown     | NA      | NA       | NA       | SJC_S000437 | NA    | NA     | NA | Sjp_0048530.1 | NA                    | NA       |
| unknown     | NA      | NA       | NA       | SJC_S000437 | NA    | NA     | NA | Sjp_0048540.1 | catalytic activity    | 0.035844 |
| unknown     | NA      | NA       | NA       | SJC_S000438 | NA    | NA     | NA | Sjp_0048550.1 | NA                    | NA       |
| unknown     | NA      | NA       | NA       | SJC_S000438 | NA    | NA     | NA | Sjp_0048560.1 | NA                    | NA       |
| unknown     | NA      | NA       | NA       | SJC_S000438 | NA    | NA     | NA | Sjp_0048570.1 | transporter activity  | 0.782    |
| HSB10kb_664 | 1       | 35372514 | 35483420 | SJC_S000439 | 12667 | 71769  | -  | Sjp_0048580.1 | NA                    | NA       |
| HSB10kb_664 | 1       | 35372514 | 35483420 | SJC_S000439 | 12667 | 71769  | -  | Sjp_0048600.1 | NA                    | NA       |
| unknown     | NA      | NA       | NA       | SJC_S000439 | NA    | NA     | NA | Sjp_0048610.1 | NA                    | NA       |
| unknown     | NA      | NA       | NA       | SJC_S000439 | NA    | NA     | NA | Sjp_0048620.1 | NA                    | NA       |
| HSB10kb_665 | WZ      | 24835375 | 24862848 | SJC_S000440 | 6929  | 30268  | +  | Sjp_0048630.1 | biological regulation | 0.76396  |
| EBR10kb_364 | "WZ,WZ" | NA       | NA       | SJC_S000440 | 30269 | 61093  | NA | Sjp_0048650.1 | catalytic activity    | 0.035844 |
| HSB10kb_666 | WZ      | 25227149 | 25244261 | SJC_S000440 | 61094 | 76233  | -  | Sjp_0048660.1 | binding               | 0.052762 |
| HSB10kb_667 | WZ      | 15962522 | 15980703 | SJC_S000441 | 773   | 14435  | +  | Sjp_0048670.1 | NA                    | NA       |
| HSB10kb_667 | WZ      | 15962522 | 15980703 | SJC_S000441 | 773   | 14435  | +  | Sjp_0048680.1 | NA                    | NA       |
| EBR10kb_365 | "WZ,WZ" | NA       | NA       | SJC_S000441 | 14436 | 34467  | NA | Sjp_0048690.1 | NA                    | NA       |
| EBR10kb_365 | "WZ,WZ" | NA       | NA       | SJC_S000441 | 14436 | 34467  | NA | Sjp_0048700.1 | NA                    | NA       |
| HSB10kb_668 | WZ      | 16365784 | 16413406 | SJC_S000441 | 34468 | 100840 | +  | Sjp_0048700.1 | NA                    | NA       |
| HSB10kb_668 | WZ      | 16365784 | 16413406 | SJC_S000441 | 34468 | 100840 | +  | Sjp_0048720.1 | NA                    | NA       |
| HSB10kb_669 | WZ      | 32973849 | 32991328 | SJC_S000442 | 33025 | 49104  | +  | Sjp_0048730.1 | NA                    | NA       |

|             |       |          |          |             |        |        |    |               |                       |          |
|-------------|-------|----------|----------|-------------|--------|--------|----|---------------|-----------------------|----------|
| unknown     | NA    | NA       | NA       | SJC_S000444 | NA     | NA     | NA | Sjp_0048750.1 | NA                    | NA       |
| HSB10kb_670 | WZ    | 28474721 | 28494922 | SJC_S000444 | 14669  | 29652  | +  | Sjp_0048760.1 | catalytic activity    | 0.035844 |
| HSB10kb_671 | 3     | 9811219  | 9982673  | SJC_S000445 | 26208  | 201752 | +  | Sjp_0048770.1 | NA                    | NA       |
| HSB10kb_671 | 3     | 9811219  | 9982673  | SJC_S000445 | 26208  | 201752 | +  | Sjp_0048780.1 | NA                    | NA       |
| HSB10kb_671 | 3     | 9811219  | 9982673  | SJC_S000445 | 26208  | 201752 | +  | Sjp_0048790.1 | NA                    | NA       |
| HSB10kb_671 | 3     | 9811219  | 9982673  | SJC_S000445 | 26208  | 201752 | +  | Sjp_0048800.1 | NA                    | NA       |
| HSB10kb_671 | 3     | 9811219  | 9982673  | SJC_S000445 | 26208  | 201752 | +  | Sjp_0048810.1 | cell part             | 0.009037 |
| EBR10kb_366 | "3,3" | NA       | NA       | SJC_S000445 | 201753 | 218724 | NA | Sjp_0048810.1 | cell part             | 0.009037 |
| HSB10kb_672 | 3     | 7873582  | 7968923  | SJC_S000445 | 218725 | 269638 | +  | Sjp_0048820.1 | NA                    | NA       |
| unknown     | NA    | NA       | NA       | SJC_S000445 | NA     | NA     | NA | Sjp_0048830.1 | NA                    | NA       |
| unknown     | NA    | NA       | NA       | SJC_S000446 | NA     | NA     | NA | Sjp_0048840.1 | NA                    | NA       |
| unknown     | NA    | NA       | NA       | SJC_S000446 | NA     | NA     | NA | Sjp_0048850.1 | NA                    | NA       |
| unknown     | NA    | NA       | NA       | SJC_S000446 | NA     | NA     | NA | Sjp_0048860.1 | NA                    | NA       |
| unknown     | NA    | NA       | NA       | SJC_S000446 | NA     | NA     | NA | Sjp_0048870.1 | cellular process      | 0.63852  |
| unknown     | NA    | NA       | NA       | SJC_S000446 | NA     | NA     | NA | Sjp_0048880.1 | NA                    | NA       |
| unknown     | NA    | NA       | NA       | SJC_S000446 | NA     | NA     | NA | Sjp_0048890.1 | NA                    | NA       |
| HSB10kb_673 | 5     | 1167957  | 1217094  | SJC_S000447 | 16276  | 67484  | -  | Sjp_0048900.1 | catalytic activity    | 0.035844 |
| HSB10kb_673 | 5     | 1167957  | 1217094  | SJC_S000447 | 16276  | 67484  | -  | Sjp_0048910.1 | binding               | 0.052762 |
| unknown     | NA    | NA       | NA       | SJC_S000447 | NA     | NA     | NA | Sjp_0048920.1 | catalytic activity    | 0.035844 |
| unknown     | NA    | NA       | NA       | SJC_S000448 | NA     | NA     | NA | Sjp_0048930.1 | NA                    | NA       |
| unknown     | NA    | NA       | NA       | SJC_S000448 | NA     | NA     | NA | Sjp_0048940.1 | transporter activity  | 0.782    |
| unknown     | NA    | NA       | NA       | SJC_S000448 | NA     | NA     | NA | Sjp_0048960.1 | NA                    | NA       |
| HSB10kb_674 | 3     | 20956129 | 20972949 | SJC_S000448 | 153678 | 164732 | -  | Sjp_0048980.1 | NA                    | NA       |
| HSB10kb_675 | 2     | 1659289  | 1711987  | SJC_S000449 | 615    | 123843 | +  | Sjp_0048990.1 | immune system process | NA       |
| HSB10kb_675 | 2     | 1659289  | 1711987  | SJC_S000449 | 615    | 123843 | +  | Sjp_0049000.1 | NA                    | NA       |
| HSB10kb_675 | 2     | 1659289  | 1711987  | SJC_S000449 | 615    | 123843 | +  | Sjp_0049010.1 | NA                    | NA       |
| HSB10kb_675 | 2     | 1659289  | 1711987  | SJC_S000449 | 615    | 123843 | +  | Sjp_0049020.1 | NA                    | NA       |
| HSB10kb_676 | 1     | 52630061 | 52688333 | SJC_S000450 | 91890  | 152710 | +  | Sjp_0049030.1 | catalytic activity    | 0.035844 |
| HSB10kb_676 | 1     | 52630061 | 52688333 | SJC_S000450 | 91890  | 152710 | +  | Sjp_0049040.1 | NA                    | NA       |
| HSB10kb_676 | 1     | 52630061 | 52688333 | SJC_S000450 | 91890  | 152710 | +  | Sjp_0049050.1 | NA                    | NA       |
| HSB10kb_677 | 6     | 2854912  | 2950150  | SJC_S000451 | 22808  | 145594 | -  | Sjp_0049060.1 | NA                    | NA       |
| HSB10kb_677 | 6     | 2854912  | 2950150  | SJC_S000451 | 22808  | 145594 | -  | Sjp_0049070.1 | NA                    | NA       |

|             |       |          |          |             |        |        |    |               |                           |          |
|-------------|-------|----------|----------|-------------|--------|--------|----|---------------|---------------------------|----------|
| HSB10kb_677 | 6     | 2854912  | 2950150  | SJC_S000451 | 22808  | 145594 | -  | Sjp_0049080.1 | NA                        | NA       |
| HSB10kb_677 | 6     | 2854912  | 2950150  | SJC_S000451 | 22808  | 145594 | -  | Sjp_0049090.1 | NA                        | NA       |
| HSB10kb_677 | 6     | 2854912  | 2950150  | SJC_S000451 | 22808  | 145594 | -  | Sjp_0049100.1 | NA                        | NA       |
| HSB10kb_677 | 6     | 2854912  | 2950150  | SJC_S000451 | 22808  | 145594 | -  | Sjp_0049110.1 | catalytic activity        | 0.035844 |
| unknown     | NA    | NA       | NA       | SJC_S000452 | NA     | NA     | NA | Sjp_0049120.1 | NA                        | NA       |
| unknown     | NA    | NA       | NA       | SJC_S000452 | NA     | NA     | NA | Sjp_0049130.1 | NA                        | NA       |
| unknown     | NA    | NA       | NA       | SJC_S000452 | NA     | NA     | NA | Sjp_0049140.1 | NA                        | NA       |
| unknown     | NA    | NA       | NA       | SJC_S000453 | NA     | NA     | NA | Sjp_0049150.1 | NA                        | NA       |
| unknown     | NA    | NA       | NA       | SJC_S000453 | NA     | NA     | NA | Sjp_0049160.1 | NA                        | NA       |
| HSB10kb_678 | 7     | 2439095  | 2645946  | SJC_S000455 | 1780   | 191952 | -  | Sjp_0049170.1 | NA                        | NA       |
| HSB10kb_678 | 7     | 2439095  | 2645946  | SJC_S000455 | 1780   | 191952 | -  | Sjp_0049180.1 | NA                        | NA       |
| HSB10kb_678 | 7     | 2439095  | 2645946  | SJC_S000455 | 1780   | 191952 | -  | Sjp_0049190.1 | NA                        | NA       |
| HSB10kb_678 | 7     | 2439095  | 2645946  | SJC_S000455 | 1780   | 191952 | -  | Sjp_0049200.1 | catalytic activity        | 0.035844 |
| HSB10kb_678 | 7     | 2439095  | 2645946  | SJC_S000455 | 1780   | 191952 | -  | Sjp_0049210.1 | metabolic process         | 0.41934  |
| HSB10kb_678 | 7     | 2439095  | 2645946  | SJC_S000455 | 1780   | 191952 | -  | Sjp_0049220.1 | NA                        | NA       |
| HSB10kb_678 | 7     | 2439095  | 2645946  | SJC_S000455 | 1780   | 191952 | -  | Sjp_0049230.1 | catalytic activity        | 0.035844 |
| HSB10kb_678 | 7     | 2439095  | 2645946  | SJC_S000455 | 1780   | 191952 | -  | Sjp_0049240.1 | NA                        | NA       |
| HSB10kb_678 | 7     | 2439095  | 2645946  | SJC_S000455 | 1780   | 191952 | -  | Sjp_0049250.1 | NA                        | NA       |
| EBR10kb_367 | "7,3" | NA       | NA       | SJC_S000455 | 191953 | 245305 | NA | Sjp_0049250.1 | NA                        | NA       |
| EBR10kb_367 | "7,3" | NA       | NA       | SJC_S000455 | 191953 | 245305 | NA | Sjp_0049260.1 | metabolic process         | 0.41934  |
| HSB10kb_679 | 3     | 20718287 | 20793839 | SJC_S000455 | 245306 | 340542 | -  | Sjp_0049270.1 | NA                        | NA       |
| HSB10kb_679 | 3     | 20718287 | 20793839 | SJC_S000455 | 245306 | 340542 | -  | Sjp_0049280.1 | NA                        | NA       |
| HSB10kb_679 | 3     | 20718287 | 20793839 | SJC_S000455 | 245306 | 340542 | -  | Sjp_0049290.1 | NA                        | NA       |
| HSB10kb_680 | 3     | 23475640 | 23641958 | SJC_S000456 | 913    | 60622  | -  | Sjp_0049300.1 | NA                        | NA       |
| HSB10kb_680 | 3     | 23475640 | 23641958 | SJC_S000456 | 913    | 60622  | -  | Sjp_0049310.1 | enzyme regulator activity | 0.1755   |
| HSB10kb_680 | 3     | 23475640 | 23641958 | SJC_S000456 | 913    | 60622  | -  | Sjp_0049320.1 | NA                        | NA       |
| HSB10kb_680 | 3     | 23475640 | 23641958 | SJC_S000456 | 913    | 60622  | -  | Sjp_0049330.1 | NA                        | NA       |
| HSB10kb_680 | 3     | 23475640 | 23641958 | SJC_S000456 | 913    | 60622  | -  | Sjp_0049340.1 | NA                        | NA       |
| EBR10kb_368 | "3,3" | NA       | NA       | SJC_S000456 | 60623  | 75129  | NA | Sjp_0049340.1 | NA                        | NA       |
| EBR10kb_368 | "3,3" | NA       | NA       | SJC_S000456 | 60623  | 75129  | NA | Sjp_0049350.1 | developmental             | NA       |

|             |       |          |          |             |        |        |    |               |                           |          |
|-------------|-------|----------|----------|-------------|--------|--------|----|---------------|---------------------------|----------|
|             |       |          |          |             |        |        |    |               | process                   |          |
| HSB10kb_681 | 3     | 23393981 | 23418565 | SJC_S000456 | 75130  | 146463 | -  | Sjp_0049350.1 | developmental process     | NA       |
| HSB10kb_681 | 3     | 23393981 | 23418565 | SJC_S000456 | 75130  | 146463 | -  | Sjp_0049360.1 | transporter activity      | 0.782    |
| EBR10kb_369 | "3,3" | NA       | NA       | SJC_S000456 | 146464 | 189076 | NA | Sjp_0049360.1 | transporter activity      | 0.782    |
| EBR10kb_369 | "3,3" | NA       | NA       | SJC_S000456 | 146464 | 189076 | NA | Sjp_0049370.1 | transporter activity      | 0.782    |
| EBR10kb_369 | "3,3" | NA       | NA       | SJC_S000456 | 146464 | 189076 | NA | Sjp_0049380.1 | NA                        | NA       |
| HSB10kb_682 | 3     | 23232910 | 23293008 | SJC_S000456 | 189077 | 253803 | +  | Sjp_0049380.1 | NA                        | NA       |
| HSB10kb_682 | 3     | 23232910 | 23293008 | SJC_S000456 | 189077 | 253803 | +  | Sjp_0049390.1 | cell part                 | 0.009037 |
| unknown     | NA    | NA       | NA       | SJC_S000456 | NA     | NA     | NA | Sjp_0049400.1 | NA                        | NA       |
| unknown     | NA    | NA       | NA       | SJC_S000457 | NA     | NA     | NA | Sjp_0049410.1 | catalytic activity        | 0.035844 |
| unknown     | NA    | NA       | NA       | SJC_S000457 | NA     | NA     | NA | Sjp_0049420.1 | binding                   | 0.052762 |
| unknown     | NA    | NA       | NA       | SJC_S000457 | NA     | NA     | NA | Sjp_0049430.1 | catalytic activity        | 0.035844 |
| unknown     | NA    | NA       | NA       | SJC_S000457 | NA     | NA     | NA | Sjp_0049440.1 | biological regulation     | 0.76396  |
| HSB10kb_683 | 6     | 7317366  | 7336901  | SJC_S000457 | 180217 | 196079 | -  | Sjp_0049450.1 | binding                   | 0.052762 |
| HSB10kb_683 | 6     | 7317366  | 7336901  | SJC_S000457 | 180217 | 196079 | -  | Sjp_0049460.1 | NA                        | NA       |
| unknown     | NA    | NA       | NA       | SJC_S000457 | NA     | NA     | NA | Sjp_0049470.1 | catalytic activity        | 0.035844 |
| unknown     | NA    | NA       | NA       | SJC_S000457 | NA     | NA     | NA | Sjp_0049480.1 | binding                   | 0.052762 |
| unknown     | NA    | NA       | NA       | SJC_S000457 | NA     | NA     | NA | Sjp_0049490.1 | NA                        | NA       |
| unknown     | NA    | NA       | NA       | SJC_S000457 | NA     | NA     | NA | Sjp_0049500.1 | cell part                 | 0.009037 |
| HSB10kb_684 | 2     | 21413652 | 21798912 | SJC_S000458 | 3842   | 369089 | +  | Sjp_0049510.1 | NA                        | NA       |
| HSB10kb_684 | 2     | 21413652 | 21798912 | SJC_S000458 | 3842   | 369089 | +  | Sjp_0049520.1 | binding                   | 0.052762 |
| HSB10kb_684 | 2     | 21413652 | 21798912 | SJC_S000458 | 3842   | 369089 | +  | Sjp_0049530.1 | enzyme regulator activity | 0.1755   |
| HSB10kb_684 | 2     | 21413652 | 21798912 | SJC_S000458 | 3842   | 369089 | +  | Sjp_0049540.1 | catalytic activity        | 0.035844 |
| HSB10kb_684 | 2     | 21413652 | 21798912 | SJC_S000458 | 3842   | 369089 | +  | Sjp_0049550.1 | catalytic activity        | 0.035844 |
| HSB10kb_684 | 2     | 21413652 | 21798912 | SJC_S000458 | 3842   | 369089 | +  | Sjp_0049560.1 | NA                        | NA       |
| HSB10kb_684 | 2     | 21413652 | 21798912 | SJC_S000458 | 3842   | 369089 | +  | Sjp_0049570.1 | biological regulation     | 0.76396  |

|             |         |          |          |             |        |        |    |               |                               |          |
|-------------|---------|----------|----------|-------------|--------|--------|----|---------------|-------------------------------|----------|
| HSB10kb_684 | 2       | 21413652 | 21798912 | SJC_S000458 | 3842   | 369089 | +  | Sjp_0049580.1 | biological regulation         | 0.76396  |
| HSB10kb_684 | 2       | 21413652 | 21798912 | SJC_S000458 | 3842   | 369089 | +  | Sjp_0049590.1 | NA                            | NA       |
| unknown     | NA      | NA       | NA       | SJC_S000459 | NA     | NA     | NA | Sjp_0049600.1 | NA                            | NA       |
| unknown     | NA      | NA       | NA       | SJC_S000459 | NA     | NA     | NA | Sjp_0049610.1 | NA                            | NA       |
| unknown     | NA      | NA       | NA       | SJC_S000459 | NA     | NA     | NA | Sjp_0049620.1 | cell part                     | 0.009037 |
| unknown     | NA      | NA       | NA       | SJC_S000459 | NA     | NA     | NA | Sjp_0049630.1 | enzyme regulator activity     | 0.1755   |
| unknown     | NA      | NA       | NA       | SJC_S000459 | NA     | NA     | NA | Sjp_0049640.1 | molecular transducer activity | 0.50162  |
| unknown     | NA      | NA       | NA       | SJC_S000459 | NA     | NA     | NA | Sjp_0049650.1 | catalytic activity            | 0.035844 |
| unknown     | NA      | NA       | NA       | SJC_S000459 | NA     | NA     | NA | Sjp_0049660.1 | catalytic activity            | 0.035844 |
| unknown     | NA      | NA       | NA       | SJC_S000459 | NA     | NA     | NA | Sjp_0049670.1 | NA                            | NA       |
| unknown     | NA      | NA       | NA       | SJC_S000459 | NA     | NA     | NA | Sjp_0049680.1 | cell part                     | 0.009037 |
| unknown     | NA      | NA       | NA       | SJC_S000459 | NA     | NA     | NA | Sjp_0049690.1 | cell part                     | 0.009037 |
| unknown     | NA      | NA       | NA       | SJC_S000460 | NA     | NA     | NA | Sjp_0049700.1 | NA                            | NA       |
| HSB10kb_685 | WZ      | 7684324  | 7731634  | SJC_S000460 | 32577  | 65160  | -  | Sjp_0049710.1 | NA                            | NA       |
| HSB10kb_685 | WZ      | 7684324  | 7731634  | SJC_S000460 | 32577  | 65160  | -  | Sjp_0049720.1 | NA                            | NA       |
| HSB10kb_685 | WZ      | 7684324  | 7731634  | SJC_S000460 | 32577  | 65160  | -  | Sjp_0049730.1 | NA                            | NA       |
| EBR10kb_370 | "WZ,WZ" | NA       | NA       | SJC_S000460 | 65161  | 136407 | NA | Sjp_0049730.1 | NA                            | NA       |
| HSB10kb_686 | WZ      | 7421280  | 7647015  | SJC_S000460 | 136408 | 370284 | -  | Sjp_0049730.1 | NA                            | NA       |
| HSB10kb_686 | WZ      | 7421280  | 7647015  | SJC_S000460 | 136408 | 370284 | -  | Sjp_0049740.1 | binding                       | 0.052762 |
| HSB10kb_686 | WZ      | 7421280  | 7647015  | SJC_S000460 | 136408 | 370284 | -  | Sjp_0049750.1 | NA                            | NA       |
| HSB10kb_686 | WZ      | 7421280  | 7647015  | SJC_S000460 | 136408 | 370284 | -  | Sjp_0049760.1 | NA                            | NA       |
| HSB10kb_686 | WZ      | 7421280  | 7647015  | SJC_S000460 | 136408 | 370284 | -  | Sjp_0049770.1 | developmental process         | NA       |
| HSB10kb_686 | WZ      | 7421280  | 7647015  | SJC_S000460 | 136408 | 370284 | -  | Sjp_0049780.1 | catalytic activity            | 0.035844 |
| unknown     | NA      | NA       | NA       | SJC_S000461 | NA     | NA     | NA | Sjp_0049790.1 | NA                            | NA       |
| unknown     | NA      | NA       | NA       | SJC_S000461 | NA     | NA     | NA | Sjp_0049800.1 | NA                            | NA       |
| unknown     | NA      | NA       | NA       | SJC_S000461 | NA     | NA     | NA | Sjp_0049810.1 | biological regulation         | 0.76396  |
| HSB10kb_687 | 1       | 19114144 | 19230466 | SJC_S000461 | 93484  | 206836 | -  | Sjp_0049820.1 | NA                            | NA       |

|             |       |          |          |             |        |        |    |               |                               |          |
|-------------|-------|----------|----------|-------------|--------|--------|----|---------------|-------------------------------|----------|
| HSB10kb_687 | 1     | 19114144 | 19230466 | SJC_S000461 | 93484  | 206836 | -  | Sjp_0049830.1 | NA                            | NA       |
| HSB10kb_687 | 1     | 19114144 | 19230466 | SJC_S000461 | 93484  | 206836 | -  | Sjp_0049840.1 | NA                            | NA       |
| HSB10kb_688 | 6     | 16875418 | 17178624 | SJC_S000462 | 1683   | 296173 | +  | Sjp_0049850.1 | NA                            | NA       |
| HSB10kb_688 | 6     | 16875418 | 17178624 | SJC_S000462 | 1683   | 296173 | +  | Sjp_0049860.1 | NA                            | NA       |
| HSB10kb_688 | 6     | 16875418 | 17178624 | SJC_S000462 | 1683   | 296173 | +  | Sjp_0049870.1 | NA                            | NA       |
| HSB10kb_688 | 6     | 16875418 | 17178624 | SJC_S000462 | 1683   | 296173 | +  | Sjp_0049880.1 | NA                            | NA       |
| HSB10kb_688 | 6     | 16875418 | 17178624 | SJC_S000462 | 1683   | 296173 | +  | Sjp_0049890.1 | NA                            | NA       |
| HSB10kb_688 | 6     | 16875418 | 17178624 | SJC_S000462 | 1683   | 296173 | +  | Sjp_0049900.1 | NA                            | NA       |
| HSB10kb_688 | 6     | 16875418 | 17178624 | SJC_S000462 | 1683   | 296173 | +  | Sjp_0049920.1 | cellular process              | 0.63852  |
| HSB10kb_688 | 6     | 16875418 | 17178624 | SJC_S000462 | 1683   | 296173 | +  | Sjp_0049930.1 | NA                            | NA       |
| unknown     | NA    | NA       | NA       | SJC_S000463 | NA     | NA     | NA | Sjp_0049940.1 | biological regulation         | 0.76396  |
| unknown     | NA    | NA       | NA       | SJC_S000463 | NA     | NA     | NA | Sjp_0049950.1 | NA                            | NA       |
| unknown     | NA    | NA       | NA       | SJC_S000463 | NA     | NA     | NA | Sjp_0049960.1 | binding                       | 0.052762 |
| unknown     | NA    | NA       | NA       | SJC_S000463 | NA     | NA     | NA | Sjp_0049970.1 | NA                            | NA       |
| unknown     | NA    | NA       | NA       | SJC_S000464 | NA     | NA     | NA | Sjp_0049980.1 | NA                            | NA       |
| unknown     | NA    | NA       | NA       | SJC_S000464 | NA     | NA     | NA | Sjp_0049990.1 | NA                            | NA       |
| HSB10kb_689 | 1     | 24216723 | 24237293 | SJC_S000464 | 57112  | 72848  | +  | NA            | NA                            | NA       |
| EBR10kb_371 | "1,1" | NA       | NA       | SJC_S000464 | 72849  | 113103 | NA | Sjp_0050000.1 | molecular transducer activity | 0.50162  |
| EBR10kb_371 | "1,1" | NA       | NA       | SJC_S000464 | 72849  | 113103 | NA | Sjp_0050010.1 | catalytic activity            | 0.035844 |
| EBR10kb_371 | "1,1" | NA       | NA       | SJC_S000464 | 72849  | 113103 | NA | Sjp_0050020.1 | NA                            | NA       |
| EBR10kb_371 | "1,1" | NA       | NA       | SJC_S000464 | 72849  | 113103 | NA | Sjp_0050030.1 | NA                            | NA       |
| HSB10kb_690 | 1     | 4511753  | 4526221  | SJC_S000464 | 113104 | 124825 |    | Sjp_0050030.1 | NA                            | NA       |
| unknown     | NA    | NA       | NA       | SJC_S000465 | NA     | NA     | NA | Sjp_0050040.1 | NA                            | NA       |
| unknown     | NA    | NA       | NA       | SJC_S000465 | NA     | NA     | NA | Sjp_0050050.1 | NA                            | NA       |
| unknown     | NA    | NA       | NA       | SJC_S000465 | NA     | NA     | NA | Sjp_0050060.1 | NA                            | NA       |
| unknown     | NA    | NA       | NA       | SJC_S000465 | NA     | NA     | NA | Sjp_0050070.1 | NA                            | NA       |
| unknown     | NA    | NA       | NA       | SJC_S000465 | NA     | NA     | NA | Sjp_0050080.1 | NA                            | NA       |
| HSB10kb_691 | 1     | 27282749 | 27337239 | SJC_S000466 | 10952  | 40629  | +  | Sjp_0050100.1 | metabolic process             | 0.41934  |
| EBR10kb_372 | "1,1" | NA       | NA       | SJC_S000466 | 40630  | 130688 | NA | Sjp_0050100.1 | metabolic process             | 0.41934  |

|             |        |          |          |             |        |        |    |               |                                               |          |
|-------------|--------|----------|----------|-------------|--------|--------|----|---------------|-----------------------------------------------|----------|
| EBR10kb_372 | "1,1"  | NA       | NA       | SJC_S000466 | 40630  | 130688 | NA | Sjp_0050110.1 | NA                                            | NA       |
| EBR10kb_372 | "1,1"  | NA       | NA       | SJC_S000466 | 40630  | 130688 | NA | Sjp_0050120.1 | cellular process                              | 0.63852  |
| EBR10kb_372 | "1,1"  | NA       | NA       | SJC_S000466 | 40630  | 130688 | NA | Sjp_0050130.1 | binding                                       | 0.052762 |
| EBR10kb_372 | "1,1"  | NA       | NA       | SJC_S000466 | 40630  | 130688 | NA | Sjp_0050140.1 | cell part                                     | 0.009037 |
| HSB10kb_692 | 1      | 21409793 | 21457924 | SJC_S000466 | 130689 | 163669 | +  | Sjp_0050140.1 | cell part                                     | 0.009037 |
| HSB10kb_692 | 1      | 21409793 | 21457924 | SJC_S000466 | 130689 | 163669 | +  | Sjp_0050150.1 | catalytic activity                            | 0.035844 |
| HSB10kb_692 | 1      | 21409793 | 21457924 | SJC_S000466 | 130689 | 163669 | +  | Sjp_0050160.1 | catalytic activity                            | 0.035844 |
| unknown     | NA     | NA       | NA       | SJC_S000466 | NA     | NA     | NA | Sjp_0050170.1 | NA                                            | NA       |
| unknown     | NA     | NA       | NA       | SJC_S000466 | NA     | NA     | NA | Sjp_0050180.1 | transcription regulator activity              | NA       |
| unknown     | NA     | NA       | NA       | SJC_S000466 | NA     | NA     | NA | Sjp_0050190.1 | NA                                            | NA       |
| unknown     | NA     | NA       | NA       | SJC_S000466 | NA     | NA     | NA | Sjp_0050200.1 | NA                                            | NA       |
| HSB10kb_693 | 7      | 7175807  | 7348604  | SJC_S000467 | 3409   | 166615 | -  | Sjp_0050210.1 | protein binding transcription factor activity | NA       |
| HSB10kb_693 | 7      | 7175807  | 7348604  | SJC_S000467 | 3409   | 166615 | -  | Sjp_0050230.1 | enzyme regulator activity                     | 0.1755   |
| HSB10kb_693 | 7      | 7175807  | 7348604  | SJC_S000467 | 3409   | 166615 | -  | Sjp_0050240.1 | enzyme regulator activity                     | 0.1755   |
| HSB10kb_693 | 7      | 7175807  | 7348604  | SJC_S000467 | 3409   | 166615 | -  | Sjp_0050250.1 | transporter activity                          | 0.782    |
| unknown     | NA     | NA       | NA       | SJC_S000467 | NA     | NA     | NA | Sjp_0050260.1 | NA                                            | NA       |
| unknown     | NA     | NA       | NA       | SJC_S000468 | NA     | NA     | NA | Sjp_0050270.1 | NA                                            | NA       |
| unknown     | NA     | NA       | NA       | SJC_S000468 | NA     | NA     | NA | Sjp_0050280.1 | NA                                            | NA       |
| HSB10kb_694 | WZ     | 20771183 | 20858731 | SJC_S000468 | 35508  | 70567  |    | Sjp_0050290.1 | biological regulation                         | 0.76396  |
| HSB10kb_694 | WZ     | 20771183 | 20858731 | SJC_S000468 | 35508  | 70567  |    | Sjp_0050300.1 | NA                                            | NA       |
| unknown     | NA     | NA       | NA       | SJC_S000468 | NA     | NA     | NA | Sjp_0050310.1 | binding                                       | 0.052762 |
| unknown     | NA     | NA       | NA       | SJC_S000469 | NA     | NA     | NA | Sjp_0050320.1 | NA                                            | NA       |
| HSB10kb_695 | WZ     | 21264952 | 21306610 | SJC_S000470 | 15226  | 63084  | -  | Sjp_0050330.1 | catalytic activity                            | 0.035844 |
| HSB10kb_695 | WZ     | 21264952 | 21306610 | SJC_S000470 | 15226  | 63084  | -  | Sjp_0050340.1 | NA                                            | NA       |
| EBR10kb_373 | "WZ,2" | NA       | NA       | SJC_S000470 | 63085  | 73432  | NA | Sjp_0050350.1 | catalytic activity                            | 0.035844 |



|             |       |          |          |             |        |        |    |               |                                               |          |
|-------------|-------|----------|----------|-------------|--------|--------|----|---------------|-----------------------------------------------|----------|
| HSB10kb_696 | 2     | 32798562 | 33087596 | SJC_S000470 | 73433  | 308789 | +  | Sjp_0050350.1 | catalytic activity                            | 0.035844 |
| HSB10kb_696 | 2     | 32798562 | 33087596 | SJC_S000470 | 73433  | 308789 | +  | Sjp_0050360.1 | binding                                       | 0.052762 |
| HSB10kb_696 | 2     | 32798562 | 33087596 | SJC_S000470 | 73433  | 308789 | +  | Sjp_0050370.1 | NA                                            | NA       |
| HSB10kb_696 | 2     | 32798562 | 33087596 | SJC_S000470 | 73433  | 308789 | +  | Sjp_0050380.1 | NA                                            | NA       |
| HSB10kb_696 | 2     | 32798562 | 33087596 | SJC_S000470 | 73433  | 308789 | +  | Sjp_0050390.1 | NA                                            | NA       |
| unknown     | NA    | NA       | NA       | SJC_S000471 | NA     | NA     | NA | Sjp_0050400.1 | NA                                            | NA       |
| unknown     | NA    | NA       | NA       | SJC_S000471 | NA     | NA     | NA | Sjp_0050410.1 | NA                                            | NA       |
| unknown     | NA    | NA       | NA       | SJC_S000471 | NA     | NA     | NA | Sjp_0050420.1 | cell part                                     | 0.009037 |
| HSB10kb_697 | WZ    | 48168556 | 48217030 | SJC_S000471 | 247073 | 300329 | +  | Sjp_0050430.1 | catalytic activity                            | 0.035844 |
| HSB10kb_697 | WZ    | 48168556 | 48217030 | SJC_S000471 | 247073 | 300329 | +  | Sjp_0050440.1 | NA                                            | NA       |
| HSB10kb_697 | WZ    | 48168556 | 48217030 | SJC_S000471 | 247073 | 300329 | +  | Sjp_0050450.1 | cell part                                     | 0.009037 |
| unknown     | NA    | NA       | NA       | SJC_S000472 | NA     | NA     | NA | Sjp_0050460.1 | NA                                            | NA       |
| unknown     | NA    | NA       | NA       | SJC_S000472 | NA     | NA     | NA | Sjp_0050470.1 | NA                                            | NA       |
| unknown     | NA    | NA       | NA       | SJC_S000472 | NA     | NA     | NA | Sjp_0050480.1 | catalytic activity                            | 0.035844 |
| HSB10kb_698 | 1     | 1437088  | 1587133  | SJC_S000472 | 144432 | 292079 | -  | Sjp_0050490.1 | cell part                                     | 0.009037 |
| HSB10kb_698 | 1     | 1437088  | 1587133  | SJC_S000472 | 144432 | 292079 | -  | Sjp_0050500.1 | NA                                            | NA       |
| HSB10kb_698 | 1     | 1437088  | 1587133  | SJC_S000472 | 144432 | 292079 | -  | Sjp_0050510.1 | NA                                            | NA       |
| HSB10kb_698 | 1     | 1437088  | 1587133  | SJC_S000472 | 144432 | 292079 | -  | Sjp_0050520.1 | NA                                            | NA       |
| HSB10kb_699 | 2     | 2444006  | 2500733  | SJC_S000473 | 27425  | 80705  | +  | Sjp_0050530.1 | NA                                            | NA       |
| HSB10kb_699 | 2     | 2444006  | 2500733  | SJC_S000473 | 27425  | 80705  | +  | Sjp_0050540.1 | NA                                            | NA       |
| EBR10kb_374 | "2,2" | NA       | NA       | SJC_S000473 | 80706  | 183612 | NA | Sjp_0050540.1 | NA                                            | NA       |
| EBR10kb_374 | "2,2" | NA       | NA       | SJC_S000473 | 80706  | 183612 | NA | Sjp_0050550.1 | NA                                            | NA       |
| EBR10kb_374 | "2,2" | NA       | NA       | SJC_S000473 | 80706  | 183612 | NA | Sjp_0050560.1 | cellular component organization or biogenesis | NA       |
| EBR10kb_374 | "2,2" | NA       | NA       | SJC_S000473 | 80706  | 183612 | NA | Sjp_0050570.1 | NA                                            | NA       |
| HSB10kb_700 | 2     | 11752626 | 11794899 | SJC_S000473 | 183613 | 221133 | +  | Sjp_0050580.1 | catalytic activity                            | 0.035844 |
| HSB10kb_700 | 2     | 11752626 | 11794899 | SJC_S000473 | 183613 | 221133 | +  | Sjp_0050590.1 | cell part                                     | 0.009037 |
| unknown     | NA    | NA       | NA       | SJC_S000474 | NA     | NA     | NA | Sjp_0050600.1 | biological regulation                         | 0.76396  |
| unknown     | NA    | NA       | NA       | SJC_S000474 | NA     | NA     | NA | Sjp_0050610.1 | cellular process                              | 0.63852  |
| unknown     | NA    | NA       | NA       | SJC_S000474 | NA     | NA     | NA | Sjp_0050620.1 | NA                                            | NA       |
| unknown     | NA    | NA       | NA       | SJC_S000474 | NA     | NA     | NA | Sjp_0050630.1 | NA                                            | NA       |

|             |    |          |          |             |       |        |    |               |                               |          |
|-------------|----|----------|----------|-------------|-------|--------|----|---------------|-------------------------------|----------|
| unknown     | NA | NA       | NA       | SJC_S000474 | NA    | NA     | NA | Sjp_0050640.1 | molecular transducer activity | 0.50162  |
| unknown     | NA | NA       | NA       | SJC_S000474 | NA    | NA     | NA | Sjp_0050650.1 | molecular transducer activity | 0.50162  |
| unknown     | NA | NA       | NA       | SJC_S000474 | NA    | NA     | NA | Sjp_0050660.1 | cell part                     | 0.009037 |
| unknown     | NA | NA       | NA       | SJC_S000474 | NA    | NA     | NA | Sjp_0050670.1 | cell part                     | 0.009037 |
| unknown     | NA | NA       | NA       | SJC_S000474 | NA    | NA     | NA | Sjp_0050680.1 | catalytic activity            | 0.035844 |
| unknown     | NA | NA       | NA       | SJC_S000475 | NA    | NA     | NA | Sjp_0050690.1 | NA                            | NA       |
| unknown     | NA | NA       | NA       | SJC_S000475 | NA    | NA     | NA | Sjp_0050700.1 | localization                  | NA       |
| unknown     | NA | NA       | NA       | SJC_S000475 | NA    | NA     | NA | Sjp_0050710.1 | catalytic activity            | 0.035844 |
| HSB10kb_701 | WZ | 9506985  | 9817988  | SJC_S000476 | 21755 | 331007 | +  | Sjp_0050720.1 | NA                            | NA       |
| HSB10kb_701 | WZ | 9506985  | 9817988  | SJC_S000476 | 21755 | 331007 | +  | Sjp_0050730.1 | binding                       | 0.052762 |
| HSB10kb_701 | WZ | 9506985  | 9817988  | SJC_S000476 | 21755 | 331007 | +  | Sjp_0050740.1 | catalytic activity            | 0.035844 |
| HSB10kb_701 | WZ | 9506985  | 9817988  | SJC_S000476 | 21755 | 331007 | +  | Sjp_0050750.1 | NA                            | NA       |
| HSB10kb_701 | WZ | 9506985  | 9817988  | SJC_S000476 | 21755 | 331007 | +  | Sjp_0050760.1 | NA                            | NA       |
| HSB10kb_701 | WZ | 9506985  | 9817988  | SJC_S000476 | 21755 | 331007 | +  | Sjp_0050770.1 | NA                            | NA       |
| HSB10kb_701 | WZ | 9506985  | 9817988  | SJC_S000476 | 21755 | 331007 | +  | Sjp_0050780.1 | binding                       | 0.052762 |
| HSB10kb_701 | WZ | 9506985  | 9817988  | SJC_S000476 | 21755 | 331007 | +  | Sjp_0050790.1 | NA                            | NA       |
| HSB10kb_701 | WZ | 9506985  | 9817988  | SJC_S000476 | 21755 | 331007 | +  | Sjp_0050800.1 | NA                            | NA       |
| HSB10kb_702 | 6  | 13241003 | 13358503 | SJC_S000477 | 12672 | 134940 | +  | Sjp_0050810.1 | catalytic activity            | 0.035844 |
| HSB10kb_702 | 6  | 13241003 | 13358503 | SJC_S000477 | 12672 | 134940 | +  | Sjp_0050820.1 | catalytic activity            | 0.035844 |
| HSB10kb_702 | 6  | 13241003 | 13358503 | SJC_S000477 | 12672 | 134940 | +  | Sjp_0050830.1 | catalytic activity            | 0.035844 |
| HSB10kb_702 | 6  | 13241003 | 13358503 | SJC_S000477 | 12672 | 134940 | +  | Sjp_0050840.1 | NA                            | NA       |
| HSB10kb_702 | 6  | 13241003 | 13358503 | SJC_S000477 | 12672 | 134940 | +  | Sjp_0050850.1 | biological regulation         | 0.76396  |
| HSB10kb_702 | 6  | 13241003 | 13358503 | SJC_S000477 | 12672 | 134940 | +  | Sjp_0050860.1 | NA                            | NA       |
| HSB10kb_702 | 6  | 13241003 | 13358503 | SJC_S000477 | 12672 | 134940 | +  | Sjp_0050870.1 | NA                            | NA       |
| unknown     | NA | NA       | NA       | SJC_S000478 | NA    | NA     | NA | Sjp_0050880.1 | NA                            | NA       |
| unknown     | NA | NA       | NA       | SJC_S000478 | NA    | NA     | NA | Sjp_0050900.1 | binding                       | 0.052762 |
| unknown     | NA | NA       | NA       | SJC_S000478 | NA    | NA     | NA | Sjp_0050910.1 | NA                            | NA       |
| HSB10kb_703 | 5  | 326638   | 418665   | SJC_S000478 | 41474 | 63718  | -  | Sjp_0050920.1 | cell part                     | 0.009037 |
| unknown     | NA | NA       | NA       | SJC_S000478 | NA    | NA     | NA | Sjp_0050930.1 | NA                            | NA       |

|             |       |          |          |             |        |        |    |               |                                  |          |
|-------------|-------|----------|----------|-------------|--------|--------|----|---------------|----------------------------------|----------|
| unknown     | NA    | NA       | NA       | SJC_S000478 | NA     | NA     | NA | Sjp_0050940.1 | binding                          | 0.052762 |
| unknown     | NA    | NA       | NA       | SJC_S000478 | NA     | NA     | NA | Sjp_0050950.1 | catalytic activity               | 0.035844 |
| unknown     | NA    | NA       | NA       | SJC_S000478 | NA     | NA     | NA | Sjp_0050960.1 | cell part                        | 0.009037 |
| unknown     | NA    | NA       | NA       | SJC_S000479 | NA     | NA     | NA | Sjp_0050970.1 | NA                               | NA       |
| HSB10kb_704 | 7     | 212537   | 264471   | SJC_S000479 | 73605  | 121251 | +  | Sjp_0050980.1 | binding                          | 0.052762 |
| HSB10kb_704 | 7     | 212537   | 264471   | SJC_S000479 | 73605  | 121251 | +  | Sjp_0050990.1 | NA                               | NA       |
| EBR10kb_375 | "7,7" | NA       | NA       | SJC_S000479 | 121252 | 187159 | NA | Sjp_0050990.1 | NA                               | NA       |
| HSB10kb_705 | 7     | 306654   | 376543   | SJC_S000479 | 187160 | 268938 | -  | Sjp_0051000.1 | NA                               | NA       |
| HSB10kb_705 | 7     | 306654   | 376543   | SJC_S000479 | 187160 | 268938 | -  | Sjp_0051010.1 | NA                               | NA       |
| unknown     | NA    | NA       | NA       | SJC_S000481 | NA     | NA     | NA | Sjp_0051020.1 | biological regulation            | 0.76396  |
| unknown     | NA    | NA       | NA       | SJC_S000481 | NA     | NA     | NA | Sjp_0051030.1 | NA                               | NA       |
| unknown     | NA    | NA       | NA       | SJC_S000481 | NA     | NA     | NA | Sjp_0051040.1 | catalytic activity               | 0.035844 |
| unknown     | NA    | NA       | NA       | SJC_S000482 | NA     | NA     | NA | Sjp_0051050.1 | NA                               | NA       |
| unknown     | NA    | NA       | NA       | SJC_S000482 | NA     | NA     | NA | Sjp_0051060.1 | cell part                        | 0.009037 |
| unknown     | NA    | NA       | NA       | SJC_S000482 | NA     | NA     | NA | Sjp_0051070.1 | catalytic activity               | 0.035844 |
| unknown     | NA    | NA       | NA       | SJC_S000482 | NA     | NA     | NA | Sjp_0051080.1 | catalytic activity               | 0.035844 |
| unknown     | NA    | NA       | NA       | SJC_S000482 | NA     | NA     | NA | Sjp_0051090.1 | NA                               | NA       |
| unknown     | NA    | NA       | NA       | SJC_S000482 | NA     | NA     | NA | Sjp_0051100.1 | NA                               | NA       |
| unknown     | NA    | NA       | NA       | SJC_S000482 | NA     | NA     | NA | Sjp_0051110.1 | transcription regulator activity | NA       |
| unknown     | NA    | NA       | NA       | SJC_S000482 | NA     | NA     | NA | Sjp_0051120.1 | NA                               | NA       |
| unknown     | NA    | NA       | NA       | SJC_S000482 | NA     | NA     | NA | Sjp_0051130.1 | NA                               | NA       |
| unknown     | NA    | NA       | NA       | SJC_S000482 | NA     | NA     | NA | Sjp_0051140.1 | NA                               | NA       |
| unknown     | NA    | NA       | NA       | SJC_S000482 | NA     | NA     | NA | Sjp_0051150.1 | catalytic activity               | 0.035844 |
| unknown     | NA    | NA       | NA       | SJC_S000482 | NA     | NA     | NA | Sjp_0051160.1 | NA                               | NA       |
| unknown     | NA    | NA       | NA       | SJC_S000483 | NA     | NA     | NA | Sjp_0051170.1 | biological regulation            | 0.76396  |
| HSB10kb_706 | 2     | 24330457 | 24456093 | SJC_S000484 | 15526  | 131444 | +  | Sjp_0051180.1 | transporter activity             | 0.782    |
| HSB10kb_706 | 2     | 24330457 | 24456093 | SJC_S000484 | 15526  | 131444 | +  | Sjp_0051190.1 | NA                               | NA       |
| HSB10kb_706 | 2     | 24330457 | 24456093 | SJC_S000484 | 15526  | 131444 | +  | Sjp_0051210.1 | cellular process                 | 0.63852  |
| EBR10kb_376 | "2,2" | NA       | NA       | SJC_S000484 | 131445 | 161502 | NA | Sjp_0051210.1 | cellular process                 | 0.63852  |

|             |         |          |          |             |        |        |    |               |                           |          |
|-------------|---------|----------|----------|-------------|--------|--------|----|---------------|---------------------------|----------|
| EBR10kb_376 | "2,2"   | NA       | NA       | SJC_S000484 | 131445 | 161502 | NA | Sjp_0051220.1 | cellular process          | 0.63852  |
| HSB10kb_707 | 2       | 24017399 | 24316270 | SJC_S000484 | 161503 | 370367 | -  | Sjp_0051220.1 | cellular process          | 0.63852  |
| HSB10kb_707 | 2       | 24017399 | 24316270 | SJC_S000484 | 161503 | 370367 | -  | Sjp_0051230.1 | enzyme regulator activity | 0.1755   |
| HSB10kb_707 | 2       | 24017399 | 24316270 | SJC_S000484 | 161503 | 370367 | -  | Sjp_0051240.1 | NA                        | NA       |
| HSB10kb_707 | 2       | 24017399 | 24316270 | SJC_S000484 | 161503 | 370367 | -  | Sjp_0051250.1 | NA                        | NA       |
| HSB10kb_707 | 2       | 24017399 | 24316270 | SJC_S000484 | 161503 | 370367 | -  | Sjp_0051260.1 | catalytic activity        | 0.035844 |
| HSB10kb_707 | 2       | 24017399 | 24316270 | SJC_S000484 | 161503 | 370367 | -  | Sjp_0051270.1 | NA                        | NA       |
| HSB10kb_707 | 2       | 24017399 | 24316270 | SJC_S000484 | 161503 | 370367 | -  | Sjp_0051280.1 | catalytic activity        | 0.035844 |
| HSB10kb_707 | 2       | 24017399 | 24316270 | SJC_S000484 | 161503 | 370367 | -  | Sjp_0051290.1 | NA                        | NA       |
| unknown     | NA      | NA       | NA       | SJC_S000485 | NA     | NA     | NA | Sjp_0051300.1 | NA                        | NA       |
| unknown     | NA      | NA       | NA       | SJC_S000485 | NA     | NA     | NA | Sjp_0051310.1 | NA                        | NA       |
| unknown     | NA      | NA       | NA       | SJC_S000485 | NA     | NA     | NA | Sjp_0051320.1 | NA                        | NA       |
| HSB10kb_708 | 3       | 25604753 | 26046359 | SJC_S000485 | 29463  | 395500 | -  | Sjp_0051330.1 | NA                        | NA       |
| HSB10kb_708 | 3       | 25604753 | 26046359 | SJC_S000485 | 29463  | 395500 | -  | Sjp_0051340.1 | binding                   | 0.052762 |
| HSB10kb_708 | 3       | 25604753 | 26046359 | SJC_S000485 | 29463  | 395500 | -  | Sjp_0051350.1 | NA                        | NA       |
| HSB10kb_708 | 3       | 25604753 | 26046359 | SJC_S000485 | 29463  | 395500 | -  | Sjp_0051360.1 | catalytic activity        | 0.035844 |
| HSB10kb_708 | 3       | 25604753 | 26046359 | SJC_S000485 | 29463  | 395500 | -  | Sjp_0051370.1 | catalytic activity        | 0.035844 |
| HSB10kb_708 | 3       | 25604753 | 26046359 | SJC_S000485 | 29463  | 395500 | -  | Sjp_0051380.1 | NA                        | NA       |
| HSB10kb_708 | 3       | 25604753 | 26046359 | SJC_S000485 | 29463  | 395500 | -  | Sjp_0051390.1 | NA                        | NA       |
| HSB10kb_708 | 3       | 25604753 | 26046359 | SJC_S000485 | 29463  | 395500 | -  | Sjp_0051400.1 | NA                        | NA       |
| HSB10kb_708 | 3       | 25604753 | 26046359 | SJC_S000485 | 29463  | 395500 | -  | Sjp_0051410.1 | NA                        | NA       |
| HSB10kb_708 | 3       | 25604753 | 26046359 | SJC_S000485 | 29463  | 395500 | -  | Sjp_0051420.1 | NA                        | NA       |
| HSB10kb_708 | 3       | 25604753 | 26046359 | SJC_S000485 | 29463  | 395500 | -  | Sjp_0051430.1 | biological regulation     | 0.76396  |
| HSB10kb_708 | 3       | 25604753 | 26046359 | SJC_S000485 | 29463  | 395500 | -  | Sjp_0051440.1 | cell part                 | 0.009037 |
| HSB10kb_708 | 3       | 25604753 | 26046359 | SJC_S000485 | 29463  | 395500 | -  | Sjp_0051450.1 | catalytic activity        | 0.035844 |
| HSB10kb_708 | 3       | 25604753 | 26046359 | SJC_S000485 | 29463  | 395500 | -  | Sjp_0051460.1 | NA                        | NA       |
| HSB10kb_708 | 3       | 25604753 | 26046359 | SJC_S000485 | 29463  | 395500 | -  | Sjp_0051470.1 | NA                        | NA       |
| HSB10kb_709 | WZ      | 51166149 | 51188360 | SJC_S000486 | 17684  | 39360  |    | Sjp_0051480.1 | biological regulation     | 0.76396  |
| EBR10kb_377 | "WZ,WZ" | NA       | NA       | SJC_S000486 | 39361  | 43748  | NA | Sjp_0051490.1 | NA                        | NA       |
| HSB10kb_710 | WZ      | 51130185 | 51158225 | SJC_S000486 | 43749  | 88047  | +  | Sjp_0051490.1 | NA                        | NA       |

|             |         |          |          |             |        |        |    |               |                                               |          |
|-------------|---------|----------|----------|-------------|--------|--------|----|---------------|-----------------------------------------------|----------|
| HSB10kb_710 | WZ      | 51130185 | 51158225 | SJC_S000486 | 43749  | 88047  | +  | Sjp_0051500.1 | NA                                            | NA       |
| EBR10kb_378 | "WZ,WZ" | NA       | NA       | SJC_S000486 | 88048  | 121143 | NA | Sjp_0051510.1 | cell part                                     | 0.009037 |
| HSB10kb_711 | WZ      | 50894300 | 51043747 | SJC_S000486 | 121144 | 238729 | -  | Sjp_0051510.1 | cell part                                     | 0.009037 |
| HSB10kb_711 | WZ      | 50894300 | 51043747 | SJC_S000486 | 121144 | 238729 | -  | Sjp_0051520.1 | NA                                            | NA       |
| HSB10kb_711 | WZ      | 50894300 | 51043747 | SJC_S000486 | 121144 | 238729 | -  | Sjp_0051530.1 | NA                                            | NA       |
| HSB10kb_711 | WZ      | 50894300 | 51043747 | SJC_S000486 | 121144 | 238729 | -  | Sjp_0051540.1 | NA                                            | NA       |
| HSB10kb_711 | WZ      | 50894300 | 51043747 | SJC_S000486 | 121144 | 238729 | -  | Sjp_0051550.1 | cell part                                     | 0.009037 |
| HSB10kb_711 | WZ      | 50894300 | 51043747 | SJC_S000486 | 121144 | 238729 | -  | Sjp_0051560.1 | NA                                            | NA       |
| HSB10kb_712 | WZ      | 51822350 | 51838250 | SJC_S000487 | 1394   | 11853  | +  | NA            | NA                                            | NA       |
| unknown     | NA      | NA       | NA       | SJC_S000487 | NA     | NA     | NA | Sjp_0051570.1 | cellular process                              | 0.63852  |
| unknown     | NA      | NA       | NA       | SJC_S000487 | NA     | NA     | NA | Sjp_0051580.1 | NA                                            | NA       |
| unknown     | NA      | NA       | NA       | SJC_S000487 | NA     | NA     | NA | Sjp_0051590.1 | NA                                            | NA       |
| unknown     | NA      | NA       | NA       | SJC_S000487 | NA     | NA     | NA | Sjp_0051600.1 | NA                                            | NA       |
| unknown     | NA      | NA       | NA       | SJC_S000487 | NA     | NA     | NA | Sjp_0051610.1 | NA                                            | NA       |
| unknown     | NA      | NA       | NA       | SJC_S000487 | NA     | NA     | NA | Sjp_0051620.1 | NA                                            | NA       |
| unknown     | NA      | NA       | NA       | SJC_S000488 | NA     | NA     | NA | Sjp_0051630.1 | NA                                            | NA       |
| HSB10kb_713 | 1       | 17223910 | 17307209 | SJC_S000489 | 62189  | 142786 | +  | Sjp_0051640.1 | NA                                            | NA       |
| HSB10kb_713 | 1       | 17223910 | 17307209 | SJC_S000489 | 62189  | 142786 | +  | Sjp_0051650.1 | NA                                            | NA       |
| HSB10kb_713 | 1       | 17223910 | 17307209 | SJC_S000489 | 62189  | 142786 | +  | Sjp_0051660.1 | cell part                                     | 0.009037 |
| HSB10kb_713 | 1       | 17223910 | 17307209 | SJC_S000489 | 62189  | 142786 | +  | Sjp_0051670.1 | NA                                            | NA       |
| HSB10kb_713 | 1       | 17223910 | 17307209 | SJC_S000489 | 62189  | 142786 | +  | Sjp_0051680.1 | cellular component organization or biogenesis | NA       |
| EBR10kb_379 | "1,WZ"  | NA       | NA       | SJC_S000489 | 142787 | 163814 | NA | Sjp_0051690.1 | cellular process                              | 0.63852  |
| EBR10kb_379 | "1,WZ"  | NA       | NA       | SJC_S000489 | 142787 | 163814 | NA | Sjp_0051700.1 | reproductive process                          | NA       |
| HSB10kb_714 | WZ      | 13695870 | 13713042 | SJC_S000489 | 163815 | 177765 | +  | Sjp_0051700.1 | reproductive process                          | NA       |
| EBR10kb_380 | "WZ,1"  | NA       | NA       | SJC_S000489 | 177766 | 253129 | NA | Sjp_0051700.1 | reproductive process                          | NA       |
| EBR10kb_380 | "WZ,1"  | NA       | NA       | SJC_S000489 | 177766 | 253129 | NA | Sjp_0051710.1 | cell part                                     | 0.009037 |
| EBR10kb_380 | "WZ,1"  | NA       | NA       | SJC_S000489 | 177766 | 253129 | NA | Sjp_0051720.1 | cellular process                              | 0.63852  |
| EBR10kb_380 | "WZ,1"  | NA       | NA       | SJC_S000489 | 177766 | 253129 | NA | Sjp_0051730.1 | binding                                       | 0.052762 |

|             |        |          |          |             |        |        |    |               |                                                     |          |
|-------------|--------|----------|----------|-------------|--------|--------|----|---------------|-----------------------------------------------------|----------|
| EBR10kb_380 | "WZ,1" | NA       | NA       | SJC_S000489 | 177766 | 253129 | NA | Sjp_0051740.1 | NA                                                  | NA       |
| HSB10kb_715 | 1      | 17694721 | 17717446 | SJC_S000489 | 253130 | 286924 | +  | Sjp_0051740.1 | NA                                                  | NA       |
| HSB10kb_715 | 1      | 17694721 | 17717446 | SJC_S000489 | 253130 | 286924 | +  | Sjp_0051750.1 | NA                                                  | NA       |
| EBR10kb_381 | "1,1"  | NA       | NA       | SJC_S000489 | 286925 | 302876 | NA | Sjp_0051750.1 | NA                                                  | NA       |
| EBR10kb_381 | "1,1"  | NA       | NA       | SJC_S000489 | 286925 | 302876 | NA | Sjp_0051760.1 | protein binding<br>transcription<br>factor activity | NA       |
| HSB10kb_716 | 1      | 17630383 | 17670339 | SJC_S000489 | 302877 | 349851 | -  | Sjp_0051760.1 | protein binding<br>transcription<br>factor activity | NA       |
| HSB10kb_717 | WZ     | 58467049 | 58707752 | SJC_S000490 | 56715  | 238195 | -  | Sjp_0051770.1 | NA                                                  | NA       |
| HSB10kb_717 | WZ     | 58467049 | 58707752 | SJC_S000490 | 56715  | 238195 | -  | Sjp_0051780.1 | NA                                                  | NA       |
| HSB10kb_717 | WZ     | 58467049 | 58707752 | SJC_S000490 | 56715  | 238195 | -  | Sjp_0051790.1 | NA                                                  | NA       |
| HSB10kb_717 | WZ     | 58467049 | 58707752 | SJC_S000490 | 56715  | 238195 | -  | Sjp_0051800.1 | NA                                                  | NA       |
| HSB10kb_717 | WZ     | 58467049 | 58707752 | SJC_S000490 | 56715  | 238195 | -  | Sjp_0051810.1 | binding                                             | 0.052762 |
| unknown     | NA     | NA       | NA       | SJC_S000491 | NA     | NA     | NA | Sjp_0051820.1 | NA                                                  | NA       |
| HSB10kb_718 | 1      | 60984957 | 61167905 | SJC_S000491 | 93401  | 315926 | -  | Sjp_0051840.1 | NA                                                  | NA       |
| HSB10kb_718 | 1      | 60984957 | 61167905 | SJC_S000491 | 93401  | 315926 | -  | Sjp_0051850.1 | NA                                                  | NA       |
| HSB10kb_718 | 1      | 60984957 | 61167905 | SJC_S000491 | 93401  | 315926 | -  | Sjp_0051860.1 | NA                                                  | NA       |
| HSB10kb_718 | 1      | 60984957 | 61167905 | SJC_S000491 | 93401  | 315926 | -  | Sjp_0051870.1 | NA                                                  | NA       |
| HSB10kb_718 | 1      | 60984957 | 61167905 | SJC_S000491 | 93401  | 315926 | -  | Sjp_0051880.1 | catalytic activity                                  | 0.035844 |
| HSB10kb_718 | 1      | 60984957 | 61167905 | SJC_S000491 | 93401  | 315926 | -  | Sjp_0051890.1 | biological<br>regulation                            | 0.76396  |
| HSB10kb_718 | 1      | 60984957 | 61167905 | SJC_S000491 | 93401  | 315926 | -  | Sjp_0051900.1 | NA                                                  | NA       |
| HSB10kb_718 | 1      | 60984957 | 61167905 | SJC_S000491 | 93401  | 315926 | -  | Sjp_0051910.1 | NA                                                  | NA       |
| HSB10kb_718 | 1      | 60984957 | 61167905 | SJC_S000491 | 93401  | 315926 | -  | Sjp_0051920.1 | NA                                                  | NA       |
| HSB10kb_718 | 1      | 60984957 | 61167905 | SJC_S000491 | 93401  | 315926 | -  | Sjp_0051930.1 | NA                                                  | NA       |
| HSB10kb_719 | 4      | 14187561 | 14832624 | SJC_S000492 | 34643  | 418786 | -  | Sjp_0051940.1 | NA                                                  | NA       |
| HSB10kb_719 | 4      | 14187561 | 14832624 | SJC_S000492 | 34643  | 418786 | -  | Sjp_0051950.1 | metabolic<br>process                                | 0.41934  |
| HSB10kb_719 | 4      | 14187561 | 14832624 | SJC_S000492 | 34643  | 418786 | -  | Sjp_0051960.1 | NA                                                  | NA       |
| HSB10kb_719 | 4      | 14187561 | 14832624 | SJC_S000492 | 34643  | 418786 | -  | Sjp_0051970.1 | NA                                                  | NA       |
| HSB10kb_719 | 4      | 14187561 | 14832624 | SJC_S000492 | 34643  | 418786 | -  | Sjp_0051980.1 | NA                                                  | NA       |
| HSB10kb_719 | 4      | 14187561 | 14832624 | SJC_S000492 | 34643  | 418786 | -  | Sjp_0051990.1 | NA                                                  | NA       |

|             |       |          |          |             |        |        |    |               |                               |          |
|-------------|-------|----------|----------|-------------|--------|--------|----|---------------|-------------------------------|----------|
| HSB10kb_719 | 4     | 14187561 | 14832624 | SJC_S000492 | 34643  | 418786 | -  | Sjp_0052000.1 | catalytic activity            | 0.035844 |
| HSB10kb_719 | 4     | 14187561 | 14832624 | SJC_S000492 | 34643  | 418786 | -  | Sjp_0052010.1 | NA                            | NA       |
| HSB10kb_719 | 4     | 14187561 | 14832624 | SJC_S000492 | 34643  | 418786 | -  | Sjp_0052020.1 | binding                       | 0.052762 |
| HSB10kb_719 | 4     | 14187561 | 14832624 | SJC_S000492 | 34643  | 418786 | -  | Sjp_0052030.1 | NA                            | NA       |
| HSB10kb_719 | 4     | 14187561 | 14832624 | SJC_S000492 | 34643  | 418786 | -  | Sjp_0052040.1 | NA                            | NA       |
| HSB10kb_719 | 4     | 14187561 | 14832624 | SJC_S000492 | 34643  | 418786 | -  | Sjp_0052050.1 | NA                            | NA       |
| HSB10kb_719 | 4     | 14187561 | 14832624 | SJC_S000492 | 34643  | 418786 | -  | Sjp_0052060.1 | catalytic activity            | 0.035844 |
| HSB10kb_719 | 4     | 14187561 | 14832624 | SJC_S000492 | 34643  | 418786 | -  | Sjp_0052070.1 | catalytic activity            | 0.035844 |
| HSB10kb_719 | 4     | 14187561 | 14832624 | SJC_S000492 | 34643  | 418786 | -  | Sjp_0052080.1 | catalytic activity            | 0.035844 |
| HSB10kb_719 | 4     | 14187561 | 14832624 | SJC_S000492 | 34643  | 418786 | -  | Sjp_0052090.1 | NA                            | NA       |
| HSB10kb_719 | 4     | 14187561 | 14832624 | SJC_S000492 | 34643  | 418786 | -  | Sjp_0052100.1 | NA                            | NA       |
| HSB10kb_719 | 4     | 14187561 | 14832624 | SJC_S000492 | 34643  | 418786 | -  | Sjp_0052110.1 | NA                            | NA       |
| unknown     | NA    | NA       | NA       | SJC_S000493 | NA     | NA     | NA | Sjp_0052120.1 | NA                            | NA       |
| unknown     | NA    | NA       | NA       | SJC_S000493 | NA     | NA     | NA | Sjp_0052130.1 | catalytic activity            | 0.035844 |
| unknown     | NA    | NA       | NA       | SJC_S000493 | NA     | NA     | NA | Sjp_0052140.1 | catalytic activity            | 0.035844 |
| HSB10kb_720 | 2     | 19598583 | 19694075 | SJC_S000493 | 87508  | 168629 | +  | Sjp_0052150.1 | NA                            | NA       |
| HSB10kb_720 | 2     | 19598583 | 19694075 | SJC_S000493 | 87508  | 168629 | +  | Sjp_0052160.1 | cell part                     | 0.009037 |
| HSB10kb_720 | 2     | 19598583 | 19694075 | SJC_S000493 | 87508  | 168629 | +  | Sjp_0052170.1 | NA                            | NA       |
| HSB10kb_720 | 2     | 19598583 | 19694075 | SJC_S000493 | 87508  | 168629 | +  | Sjp_0052180.1 | NA                            | NA       |
| unknown     | NA    | NA       | NA       | SJC_S000493 | NA     | NA     | NA | Sjp_0052190.1 | catalytic activity            | 0.035844 |
| unknown     | NA    | NA       | NA       | SJC_S000493 | NA     | NA     | NA | Sjp_0052200.1 | NA                            | NA       |
| unknown     | NA    | NA       | NA       | SJC_S000493 | NA     | NA     | NA | Sjp_0052210.1 | NA                            | NA       |
| HSB10kb_721 | 6     | 4000114  | 4068690  | SJC_S000494 | 4870   | 64761  | +  | Sjp_0052220.1 | NA                            | NA       |
| HSB10kb_721 | 6     | 4000114  | 4068690  | SJC_S000494 | 4870   | 64761  | +  | Sjp_0052230.1 | NA                            | NA       |
| EBR10kb_382 | "6,6" | NA       | NA       | SJC_S000494 | 64762  | 142766 | NA | Sjp_0052230.1 | NA                            | NA       |
| EBR10kb_382 | "6,6" | NA       | NA       | SJC_S000494 | 64762  | 142766 | NA | Sjp_0052240.1 | NA                            | NA       |
| EBR10kb_382 | "6,6" | NA       | NA       | SJC_S000494 | 64762  | 142766 | NA | Sjp_0052250.1 | NA                            | NA       |
| HSB10kb_722 | 6     | 4231168  | 4278085  | SJC_S000494 | 142767 | 196851 | -  | Sjp_0052250.1 | NA                            | NA       |
| HSB10kb_722 | 6     | 4231168  | 4278085  | SJC_S000494 | 142767 | 196851 | -  | Sjp_0052260.1 | binding                       | 0.052762 |
| EBR10kb_383 | "6,6" | NA       | NA       | SJC_S000494 | 196852 | 204435 | NA | Sjp_0052270.1 | NA                            | NA       |
| HSB10kb_723 | 6     | 7014586  | 7039619  | SJC_S000494 | 204436 | 223124 | +  | Sjp_0052270.1 | NA                            | NA       |
| unknown     | NA    | NA       | NA       | SJC_S000494 | NA     | NA     | NA | Sjp_0052280.1 | NA                            | NA       |
| unknown     | NA    | NA       | NA       | SJC_S000494 | NA     | NA     | NA | Sjp_0052290.1 | establishment of localization | NA       |

|             |       |          |          |             |        |        |    |               |                               |          |
|-------------|-------|----------|----------|-------------|--------|--------|----|---------------|-------------------------------|----------|
| unknown     | NA    | NA       | NA       | SJC_S000495 | NA     | NA     | NA | Sjp_0052300.1 | NA                            | NA       |
| unknown     | NA    | NA       | NA       | SJC_S000495 | NA     | NA     | NA | Sjp_0052310.1 | NA                            | NA       |
| unknown     | NA    | NA       | NA       | SJC_S000496 | NA     | NA     | NA | Sjp_0052330.1 | NA                            | NA       |
| HSB10kb_724 | 6     | 4111718  | 4211274  | SJC_S000496 | 18210  | 90729  | +  | Sjp_0052340.1 | catalytic activity            | 0.035844 |
| HSB10kb_724 | 6     | 4111718  | 4211274  | SJC_S000496 | 18210  | 90729  | +  | Sjp_0052350.1 | catalytic activity            | 0.035844 |
| HSB10kb_724 | 6     | 4111718  | 4211274  | SJC_S000496 | 18210  | 90729  | +  | Sjp_0052360.1 | NA                            | NA       |
| HSB10kb_724 | 6     | 4111718  | 4211274  | SJC_S000496 | 18210  | 90729  | +  | Sjp_0052370.1 | catalytic activity            | 0.035844 |
| EBR10kb_384 | "6,6" | NA       | NA       | SJC_S000496 | 90730  | 136508 | NA | Sjp_0052370.1 | catalytic activity            | 0.035844 |
| EBR10kb_384 | "6,6" | NA       | NA       | SJC_S000496 | 90730  | 136508 | NA | Sjp_0052380.1 | NA                            | NA       |
| HSB10kb_725 | 6     | 6923771  | 7000853  | SJC_S000496 | 136509 | 217791 | -  | Sjp_0052380.1 | NA                            | NA       |
| HSB10kb_725 | 6     | 6923771  | 7000853  | SJC_S000496 | 136509 | 217791 | -  | Sjp_0052390.1 | NA                            | NA       |
| HSB10kb_725 | 6     | 6923771  | 7000853  | SJC_S000496 | 136509 | 217791 | -  | Sjp_0052400.1 | NA                            | NA       |
| HSB10kb_725 | 6     | 6923771  | 7000853  | SJC_S000496 | 136509 | 217791 | -  | Sjp_0052410.1 | enzyme regulator activity     | 0.1755   |
| unknown     | NA    | NA       | NA       | SJC_S000496 | NA     | NA     | NA | Sjp_0052420.1 | NA                            | NA       |
| unknown     | NA    | NA       | NA       | SJC_S000496 | NA     | NA     | NA | Sjp_0052430.1 | NA                            | NA       |
| unknown     | NA    | NA       | NA       | SJC_S000496 | NA     | NA     | NA | Sjp_0052450.1 | NA                            | NA       |
| unknown     | NA    | NA       | NA       | SJC_S000496 | NA     | NA     | NA | Sjp_0052460.1 | NA                            | NA       |
| unknown     | NA    | NA       | NA       | SJC_S000496 | NA     | NA     | NA | Sjp_0052470.1 | NA                            | NA       |
| unknown     | NA    | NA       | NA       | SJC_S000497 | NA     | NA     | NA | Sjp_0052480.1 | NA                            | NA       |
| HSB10kb_726 | WZ    | 20331554 | 20343327 | SJC_S000497 | 110823 | 129998 |    | Sjp_0052490.1 | NA                            | NA       |
| HSB10kb_726 | WZ    | 20331554 | 20343327 | SJC_S000497 | 110823 | 129998 |    | Sjp_0052500.1 | NA                            | NA       |
| HSB10kb_727 | WZ    | 8177093  | 8352427  | SJC_S000498 | 101660 | 184034 | +  | Sjp_0052510.1 | NA                            | NA       |
| HSB10kb_727 | WZ    | 8177093  | 8352427  | SJC_S000498 | 101660 | 184034 | +  | Sjp_0052520.1 | cell part                     | 0.009037 |
| HSB10kb_727 | WZ    | 8177093  | 8352427  | SJC_S000498 | 101660 | 184034 | +  | Sjp_0052530.1 | establishment of localization | NA       |
| HSB10kb_728 | 2     | 33734582 | 33863112 | SJC_S000499 | 12033  | 144079 | -  | Sjp_0052540.1 | NA                            | NA       |
| HSB10kb_728 | 2     | 33734582 | 33863112 | SJC_S000499 | 12033  | 144079 | -  | Sjp_0052550.1 | binding                       | 0.052762 |
| HSB10kb_728 | 2     | 33734582 | 33863112 | SJC_S000499 | 12033  | 144079 | -  | Sjp_0052560.1 | NA                            | NA       |
| HSB10kb_728 | 2     | 33734582 | 33863112 | SJC_S000499 | 12033  | 144079 | -  | Sjp_0052570.1 | binding                       | 0.052762 |
| unknown     | NA    | NA       | NA       | SJC_S000500 | NA     | NA     | NA | Sjp_0052580.1 | catalytic activity            | 0.035844 |
| unknown     | NA    | NA       | NA       | SJC_S000500 | NA     | NA     | NA | Sjp_0052590.1 | NA                            | NA       |
| unknown     | NA    | NA       | NA       | SJC_S000500 | NA     | NA     | NA | Sjp_0052600.1 | NA                            | NA       |



|             |       |          |          |             |        |        |    |               |                               |          |
|-------------|-------|----------|----------|-------------|--------|--------|----|---------------|-------------------------------|----------|
| unknown     | NA    | NA       | NA       | SJC_S000500 | NA     | NA     | NA | Sjp_0052610.1 | NA                            | NA       |
| unknown     | NA    | NA       | NA       | SJC_S000500 | NA     | NA     | NA | Sjp_0052620.1 | NA                            | NA       |
| unknown     | NA    | NA       | NA       | SJC_S000501 | NA     | NA     | NA | Sjp_0052630.1 | enzyme regulator activity     | 0.1755   |
| unknown     | NA    | NA       | NA       | SJC_S000502 | NA     | NA     | NA | Sjp_0052640.1 | molecular transducer activity | 0.50162  |
| unknown     | NA    | NA       | NA       | SJC_S000503 | NA     | NA     | NA | Sjp_0052650.1 | NA                            | NA       |
| unknown     | NA    | NA       | NA       | SJC_S000503 | NA     | NA     | NA | Sjp_0052660.1 | NA                            | NA       |
| unknown     | NA    | NA       | NA       | SJC_S000504 | NA     | NA     | NA | Sjp_0052670.1 | catalytic activity            | 0.035844 |
| HSB10kb_729 | WZ    | 29866771 | 29916749 | SJC_S000505 | 6950   | 40775  | +  | Sjp_0052680.1 | catalytic activity            | 0.035844 |
| HSB10kb_729 | WZ    | 29866771 | 29916749 | SJC_S000505 | 6950   | 40775  | +  | Sjp_0052690.1 | cell part                     | 0.009037 |
| unknown     | NA    | NA       | NA       | SJC_S000505 | NA     | NA     | NA | Sjp_0052700.1 | response to stimulus          | NA       |
| unknown     | NA    | NA       | NA       | SJC_S000506 | NA     | NA     | NA | Sjp_0052710.1 | NA                            | NA       |
| unknown     | NA    | NA       | NA       | SJC_S000507 | NA     | NA     | NA | Sjp_0052720.1 | NA                            | NA       |
| unknown     | NA    | NA       | NA       | SJC_S000508 | NA     | NA     | NA | Sjp_0052730.1 | transporter activity          | 0.782    |
| HSB10kb_730 | 1     | 18137734 | 18154475 | SJC_S000511 | 68430  | 94526  | +  | Sjp_0052740.1 | NA                            | NA       |
| HSB10kb_730 | 1     | 18137734 | 18154475 | SJC_S000511 | 68430  | 94526  | +  | Sjp_0052760.1 | NA                            | NA       |
| EBR10kb_385 | "1,1" | NA       | NA       | SJC_S000511 | 94527  | 132462 | NA | Sjp_0052760.1 | NA                            | NA       |
| EBR10kb_385 | "1,1" | NA       | NA       | SJC_S000511 | 94527  | 132462 | NA | Sjp_0052770.1 | NA                            | NA       |
| EBR10kb_385 | "1,1" | NA       | NA       | SJC_S000511 | 94527  | 132462 | NA | Sjp_0052780.1 | NA                            | NA       |
| HSB10kb_731 | 1     | 18408865 | 18491386 | SJC_S000511 | 132463 | 226885 | +  | Sjp_0052780.1 | NA                            | NA       |
| HSB10kb_731 | 1     | 18408865 | 18491386 | SJC_S000511 | 132463 | 226885 | +  | Sjp_0052790.1 | NA                            | NA       |
| HSB10kb_731 | 1     | 18408865 | 18491386 | SJC_S000511 | 132463 | 226885 | +  | Sjp_0052800.1 | NA                            | NA       |
| HSB10kb_731 | 1     | 18408865 | 18491386 | SJC_S000511 | 132463 | 226885 | +  | Sjp_0052810.1 | binding                       | 0.052762 |
| HSB10kb_731 | 1     | 18408865 | 18491386 | SJC_S000511 | 132463 | 226885 | +  | Sjp_0052820.1 | NA                            | NA       |
| HSB10kb_731 | 1     | 18408865 | 18491386 | SJC_S000511 | 132463 | 226885 | +  | Sjp_0052830.1 | channel regulator activity    | NA       |
| unknown     | NA    | NA       | NA       | SJC_S000512 | NA     | NA     | NA | Sjp_0052840.1 | NA                            | NA       |
| unknown     | NA    | NA       | NA       | SJC_S000512 | NA     | NA     | NA | Sjp_0052850.1 | NA                            | NA       |

|             |       |          |          |             |        |        |    |               |                               |          |
|-------------|-------|----------|----------|-------------|--------|--------|----|---------------|-------------------------------|----------|
| unknown     | NA    | NA       | NA       | SJC_S000512 | NA     | NA     | NA | Sjp_0052860.1 | NA                            | NA       |
| HSB10kb_732 | WZ    | 20888932 | 20970861 | SJC_S000513 | 17932  | 112252 | -  | Sjp_0052870.1 | NA                            | NA       |
| HSB10kb_732 | WZ    | 20888932 | 20970861 | SJC_S000513 | 17932  | 112252 | -  | Sjp_0052880.1 | binding                       | 0.052762 |
| HSB10kb_732 | WZ    | 20888932 | 20970861 | SJC_S000513 | 17932  | 112252 | -  | Sjp_0052890.1 | NA                            | NA       |
| HSB10kb_732 | WZ    | 20888932 | 20970861 | SJC_S000513 | 17932  | 112252 | -  | Sjp_0052900.1 | catalytic activity            | 0.035844 |
| unknown     | NA    | NA       | NA       | SJC_S000513 | NA     | NA     | NA | Sjp_0052910.1 | NA                            | NA       |
| unknown     | NA    | NA       | NA       | SJC_S000514 | NA     | NA     | NA | Sjp_0052920.1 | NA                            | NA       |
| unknown     | NA    | NA       | NA       | SJC_S000514 | NA     | NA     | NA | Sjp_0052930.1 | biological regulation         | 0.76396  |
| unknown     | NA    | NA       | NA       | SJC_S000514 | NA     | NA     | NA | Sjp_0052940.1 | NA                            | NA       |
| unknown     | NA    | NA       | NA       | SJC_S000514 | NA     | NA     | NA | Sjp_0052950.1 | cell part                     | 0.009037 |
| unknown     | NA    | NA       | NA       | SJC_S000514 | NA     | NA     | NA | Sjp_0052960.1 | NA                            | NA       |
| unknown     | NA    | NA       | NA       | SJC_S000515 | NA     | NA     | NA | Sjp_0052970.1 | NA                            | NA       |
| HSB10kb_733 | 4     | 7621995  | 7634514  | SJC_S000515 | 68449  | 85571  | +  | Sjp_0052980.1 | binding                       | 0.052762 |
| HSB10kb_734 | WZ    | 20032096 | 20138514 | SJC_S000516 | 97748  | 195036 | -  | Sjp_0052990.1 | establishment of localization | NA       |
| HSB10kb_734 | WZ    | 20032096 | 20138514 | SJC_S000516 | 97748  | 195036 | -  | Sjp_0053000.1 | NA                            | NA       |
| HSB10kb_734 | WZ    | 20032096 | 20138514 | SJC_S000516 | 97748  | 195036 | -  | Sjp_0053010.1 | NA                            | NA       |
| unknown     | NA    | NA       | NA       | SJC_S000517 | NA     | NA     | NA | Sjp_0053020.1 | NA                            | NA       |
| HSB10kb_735 | WZ    | 1504479  | 1533069  | SJC_S000517 | 27850  | 56884  | +  | Sjp_0053030.1 | catalytic activity            | 0.035844 |
| unknown     | NA    | NA       | NA       | SJC_S000518 | NA     | NA     | NA | Sjp_0053040.1 | NA                            | NA       |
| unknown     | NA    | NA       | NA       | SJC_S000519 | NA     | NA     | NA | Sjp_0053050.1 | NA                            | NA       |
| unknown     | NA    | NA       | NA       | SJC_S000519 | NA     | NA     | NA | Sjp_0053060.1 | NA                            | NA       |
| HSB10kb_736 | 3     | 16701442 | 16712064 | SJC_S000519 | 127759 | 139497 | -  | Sjp_0053070.1 | biological regulation         | 0.76396  |
| EBR10kb_386 | "3,3" | NA       | NA       | SJC_S000519 | 139498 | 157336 | NA | Sjp_0053070.1 | biological regulation         | 0.76396  |
| EBR10kb_386 | "3,3" | NA       | NA       | SJC_S000519 | 139498 | 157336 | NA | Sjp_0053080.1 | NA                            | NA       |
| HSB10kb_737 | 3     | 16714246 | 16743395 | SJC_S000519 | 157337 | 197600 | +  | Sjp_0053080.1 | NA                            | NA       |
| HSB10kb_737 | 3     | 16714246 | 16743395 | SJC_S000519 | 157337 | 197600 | +  | Sjp_0053090.1 | NA                            | NA       |
| HSB10kb_737 | 3     | 16714246 | 16743395 | SJC_S000519 | 157337 | 197600 | +  | Sjp_0053100.1 | NA                            | NA       |
| unknown     | NA    | NA       | NA       | SJC_S000520 | NA     | NA     | NA | Sjp_0053110.1 | catalytic activity            | 0.035844 |
| unknown     | NA    | NA       | NA       | SJC_S000520 | NA     | NA     | NA | Sjp_0053120.1 | NA                            | NA       |
| HSB10kb_738 | 1     | 64010026 | 64116279 | SJC_S000521 | 4536   | 76439  | +  | Sjp_0053130.1 | NA                            | NA       |

|             |    |          |          |             |        |        |    |               |                                               |          |
|-------------|----|----------|----------|-------------|--------|--------|----|---------------|-----------------------------------------------|----------|
| HSB10kb_738 | 1  | 64010026 | 64116279 | SJC_S000521 | 4536   | 76439  | +  | Sjp_0053140.1 | cellular component organization or biogenesis | NA       |
| unknown     | NA | NA       | NA       | SJC_S000524 | NA     | NA     | NA | Sjp_0053150.1 | transporter activity                          | 0.782    |
| unknown     | NA | NA       | NA       | SJC_S000524 | NA     | NA     | NA | Sjp_0053160.1 | transporter activity                          | 0.782    |
| unknown     | NA | NA       | NA       | SJC_S000524 | NA     | NA     | NA | Sjp_0053170.1 | transporter activity                          | 0.782    |
| unknown     | NA | NA       | NA       | SJC_S000525 | NA     | NA     | NA | Sjp_0053180.1 | NA                                            | NA       |
| unknown     | NA | NA       | NA       | SJC_S000525 | NA     | NA     | NA | Sjp_0053190.1 | NA                                            | NA       |
| unknown     | NA | NA       | NA       | SJC_S000526 | NA     | NA     | NA | Sjp_0053200.1 | NA                                            | NA       |
| HSB10kb_739 | 3  | 8254258  | 8301369  | SJC_S000526 | 34697  | 76796  | +  | Sjp_0053210.1 | NA                                            | NA       |
| HSB10kb_739 | 3  | 8254258  | 8301369  | SJC_S000526 | 34697  | 76796  | +  | Sjp_0053220.1 | NA                                            | NA       |
| unknown     | NA | NA       | NA       | SJC_S000526 | NA     | NA     | NA | Sjp_0053230.1 | NA                                            | NA       |
| HSB10kb_740 | 1  | 36686877 | 36786175 | SJC_S000527 | 37092  | 129545 | -  | Sjp_0053240.1 | catalytic activity                            | 0.035844 |
| HSB10kb_740 | 1  | 36686877 | 36786175 | SJC_S000527 | 37092  | 129545 | -  | Sjp_0053250.1 | catalytic activity                            | 0.035844 |
| HSB10kb_740 | 1  | 36686877 | 36786175 | SJC_S000527 | 37092  | 129545 | -  | Sjp_0053260.1 | cell part                                     | 0.009037 |
| HSB10kb_740 | 1  | 36686877 | 36786175 | SJC_S000527 | 37092  | 129545 | -  | Sjp_0053270.1 | NA                                            | NA       |
| unknown     | NA | NA       | NA       | SJC_S000528 | NA     | NA     | NA | Sjp_0053280.1 | NA                                            | NA       |
| unknown     | NA | NA       | NA       | SJC_S000528 | NA     | NA     | NA | Sjp_0053290.1 | NA                                            | NA       |
| unknown     | NA | NA       | NA       | SJC_S000528 | NA     | NA     | NA | Sjp_0053300.1 | transporter activity                          | 0.782    |
| unknown     | NA | NA       | NA       | SJC_S000528 | NA     | NA     | NA | Sjp_0053310.1 | NA                                            | NA       |
| unknown     | NA | NA       | NA       | SJC_S000528 | NA     | NA     | NA | Sjp_0053320.1 | NA                                            | NA       |
| unknown     | NA | NA       | NA       | SJC_S000528 | NA     | NA     | NA | Sjp_0053330.1 | NA                                            | NA       |
| HSB10kb_741 | 4  | 510837   | 576932   | SJC_S000528 | 153708 | 230344 | -  | Sjp_0053340.1 | NA                                            | NA       |
| HSB10kb_741 | 4  | 510837   | 576932   | SJC_S000528 | 153708 | 230344 | -  | Sjp_0053350.1 | NA                                            | NA       |
| HSB10kb_741 | 4  | 510837   | 576932   | SJC_S000528 | 153708 | 230344 | -  | Sjp_0053360.1 | NA                                            | NA       |
| unknown     | NA | NA       | NA       | SJC_S000528 | NA     | NA     | NA | Sjp_0053370.1 | cell part                                     | 0.009037 |
| unknown     | NA | NA       | NA       | SJC_S000528 | NA     | NA     | NA | Sjp_0053380.1 | cell part                                     | 0.009037 |
| HSB10kb_742 | WZ | 8377232  | 8667796  | SJC_S000529 | 779    | 307672 | +  | Sjp_0053390.1 | NA                                            | NA       |
| HSB10kb_742 | WZ | 8377232  | 8667796  | SJC_S000529 | 779    | 307672 | +  | Sjp_0053400.1 | NA                                            | NA       |

|             |       |          |          |             |        |        |    |               |                                  |          |
|-------------|-------|----------|----------|-------------|--------|--------|----|---------------|----------------------------------|----------|
| HSB10kb_742 | WZ    | 8377232  | 8667796  | SJC_S000529 | 779    | 307672 | +  | Sjp_0053410.1 | NA                               | NA       |
| HSB10kb_742 | WZ    | 8377232  | 8667796  | SJC_S000529 | 779    | 307672 | +  | Sjp_0053420.1 | catalytic activity               | 0.035844 |
| HSB10kb_742 | WZ    | 8377232  | 8667796  | SJC_S000529 | 779    | 307672 | +  | Sjp_0053430.1 | NA                               | NA       |
| HSB10kb_742 | WZ    | 8377232  | 8667796  | SJC_S000529 | 779    | 307672 | +  | Sjp_0053450.1 | catalytic activity               | 0.035844 |
| HSB10kb_742 | WZ    | 8377232  | 8667796  | SJC_S000529 | 779    | 307672 | +  | Sjp_0053460.1 | binding                          | 0.052762 |
| HSB10kb_742 | WZ    | 8377232  | 8667796  | SJC_S000529 | 779    | 307672 | +  | Sjp_0053470.1 | transcription regulator activity | NA       |
| HSB10kb_742 | WZ    | 8377232  | 8667796  | SJC_S000529 | 779    | 307672 | +  | Sjp_0053490.1 | cellular process                 | 0.63852  |
| unknown     | NA    | NA       | NA       | SJC_S000529 | NA     | NA     | NA | Sjp_0053500.1 | catalytic activity               | 0.035844 |
| unknown     | NA    | NA       | NA       | SJC_S000529 | NA     | NA     | NA | Sjp_0053510.1 | catalytic activity               | 0.035844 |
| unknown     | NA    | NA       | NA       | SJC_S000530 | NA     | NA     | NA | Sjp_0053520.1 | NA                               | NA       |
| HSB10kb_743 | 1     | 31732899 | 31831529 | SJC_S000530 | 126769 | 229136 | +  | Sjp_0053530.1 | NA                               | NA       |
| HSB10kb_743 | 1     | 31732899 | 31831529 | SJC_S000530 | 126769 | 229136 | +  | Sjp_0053540.1 | cell part                        | 0.009037 |
| HSB10kb_743 | 1     | 31732899 | 31831529 | SJC_S000530 | 126769 | 229136 | +  | Sjp_0053560.1 | NA                               | NA       |
| HSB10kb_743 | 1     | 31732899 | 31831529 | SJC_S000530 | 126769 | 229136 | +  | Sjp_0053570.1 | NA                               | NA       |
| HSB10kb_743 | 1     | 31732899 | 31831529 | SJC_S000530 | 126769 | 229136 | +  | Sjp_0053580.1 | catalytic activity               | 0.035844 |
| HSB10kb_743 | 1     | 31732899 | 31831529 | SJC_S000530 | 126769 | 229136 | +  | Sjp_0053590.1 | NA                               | NA       |
| EBR10kb_387 | "1,1" | NA       | NA       | SJC_S000530 | 229137 | 235164 | NA | NA            | NA                               | NA       |
| HSB10kb_744 | 1     | 31834712 | 31892238 | SJC_S000530 | 235165 | 266167 | -  | Sjp_0053600.1 | cell part                        | 0.009037 |
| unknown     | NA    | NA       | NA       | SJC_S000530 | NA     | NA     | NA | Sjp_0053620.1 | NA                               | NA       |
| unknown     | NA    | NA       | NA       | SJC_S000531 | NA     | NA     | NA | Sjp_0053630.1 | NA                               | NA       |
| unknown     | NA    | NA       | NA       | SJC_S000531 | NA     | NA     | NA | Sjp_0053640.1 | cell part                        | 0.009037 |
| unknown     | NA    | NA       | NA       | SJC_S000531 | NA     | NA     | NA | Sjp_0053650.1 | NA                               | NA       |
| unknown     | NA    | NA       | NA       | SJC_S000532 | NA     | NA     | NA | Sjp_0053660.1 | NA                               | NA       |
| unknown     | NA    | NA       | NA       | SJC_S000532 | NA     | NA     | NA | Sjp_0053670.1 | metabolic process                | 0.41934  |
| unknown     | NA    | NA       | NA       | SJC_S000532 | NA     | NA     | NA | Sjp_0053680.1 | binding                          | 0.052762 |
| unknown     | NA    | NA       | NA       | SJC_S000532 | NA     | NA     | NA | Sjp_0053690.1 | NA                               | NA       |
| unknown     | NA    | NA       | NA       | SJC_S000532 | NA     | NA     | NA | Sjp_0053710.1 | NA                               | NA       |
| unknown     | NA    | NA       | NA       | SJC_S000533 | NA     | NA     | NA | Sjp_0053720.1 | NA                               | NA       |
| HSB10kb_745 | 4     | 8683985  | 8711278  | SJC_S000533 | 28539  | 58354  | +  | NA            | NA                               | NA       |
| EBR10kb_388 | "4,4" | NA       | NA       | SJC_S000533 | 58355  | 93544  | NA | NA            | NA                               | NA       |
| HSB10kb_746 | 4     | 8717081  | 8771317  | SJC_S000533 | 93545  | 154439 | -  | Sjp_0053740.1 | NA                               | NA       |

|             |       |          |          |             |        |        |    |               |                                  |          |
|-------------|-------|----------|----------|-------------|--------|--------|----|---------------|----------------------------------|----------|
| HSB10kb_746 | 4     | 8717081  | 8771317  | SJC_S000533 | 93545  | 154439 | -  | Sjp_0053750.1 | NA                               | NA       |
| EBR10kb_389 | "4,4" | NA       | NA       | SJC_S000533 | 154440 | 203087 | NA | Sjp_0053760.1 | NA                               | NA       |
| EBR10kb_389 | "4,4" | NA       | NA       | SJC_S000533 | 154440 | 203087 | NA | Sjp_0053770.1 | catalytic activity               | 0.035844 |
| HSB10kb_747 | 4     | 8592999  | 8615241  | SJC_S000533 | 203088 | 231908 | +  | Sjp_0053770.1 | catalytic activity               | 0.035844 |
| HSB10kb_747 | 4     | 8592999  | 8615241  | SJC_S000533 | 203088 | 231908 | +  | Sjp_0053780.1 | NA                               | NA       |
| unknown     | NA    | NA       | NA       | SJC_S000533 | NA     | NA     | NA | Sjp_0053790.1 | NA                               | NA       |
| unknown     | NA    | NA       | NA       | SJC_S000533 | NA     | NA     | NA | Sjp_0053800.1 | catalytic activity               | 0.035844 |
| unknown     | NA    | NA       | NA       | SJC_S000533 | NA     | NA     | NA | Sjp_0053810.1 | NA                               | NA       |
| HSB10kb_748 | 4     | 31921644 | 32028744 | SJC_S000534 | 4944   | 50371  | +  | Sjp_0053820.1 | NA                               | NA       |
| HSB10kb_748 | 4     | 31921644 | 32028744 | SJC_S000534 | 4944   | 50371  | +  | Sjp_0053830.1 | NA                               | NA       |
| HSB10kb_748 | 4     | 31921644 | 32028744 | SJC_S000534 | 4944   | 50371  | +  | Sjp_0053840.1 | biological regulation            | 0.76396  |
| unknown     | NA    | NA       | NA       | SJC_S000534 | NA     | NA     | NA | Sjp_0053850.1 | catalytic activity               | 0.035844 |
| HSB10kb_749 | WZ    | 47144554 | 47360363 | SJC_S000535 | 7204   | 206138 | -  | Sjp_0053860.1 | multicellular organismal process | NA       |
| HSB10kb_749 | WZ    | 47144554 | 47360363 | SJC_S000535 | 7204   | 206138 | -  | Sjp_0053870.1 | cell part                        | 0.009037 |
| HSB10kb_749 | WZ    | 47144554 | 47360363 | SJC_S000535 | 7204   | 206138 | -  | Sjp_0053880.1 | NA                               | NA       |
| HSB10kb_749 | WZ    | 47144554 | 47360363 | SJC_S000535 | 7204   | 206138 | -  | Sjp_0053890.1 | NA                               | NA       |
| HSB10kb_749 | WZ    | 47144554 | 47360363 | SJC_S000535 | 7204   | 206138 | -  | Sjp_0053900.1 | NA                               | NA       |
| HSB10kb_749 | WZ    | 47144554 | 47360363 | SJC_S000535 | 7204   | 206138 | -  | Sjp_0053910.1 | NA                               | NA       |
| HSB10kb_749 | WZ    | 47144554 | 47360363 | SJC_S000535 | 7204   | 206138 | -  | Sjp_0053920.1 | NA                               | NA       |
| HSB10kb_750 | 3     | 10952202 | 11018563 | SJC_S000536 | 43795  | 83309  | -  | Sjp_0053940.1 | NA                               | NA       |
| HSB10kb_750 | 3     | 10952202 | 11018563 | SJC_S000536 | 43795  | 83309  | -  | Sjp_0053950.1 | transporter activity             | 0.782    |
| HSB10kb_751 | 2     | 26841716 | 27017215 | SJC_S000537 | 421    | 140815 | -  | Sjp_0053960.1 | NA                               | NA       |
| HSB10kb_751 | 2     | 26841716 | 27017215 | SJC_S000537 | 421    | 140815 | -  | Sjp_0053970.1 | NA                               | NA       |
| HSB10kb_751 | 2     | 26841716 | 27017215 | SJC_S000537 | 421    | 140815 | -  | Sjp_0053980.1 | NA                               | NA       |
| HSB10kb_751 | 2     | 26841716 | 27017215 | SJC_S000537 | 421    | 140815 | -  | Sjp_0053990.1 | NA                               | NA       |
| HSB10kb_751 | 2     | 26841716 | 27017215 | SJC_S000537 | 421    | 140815 | -  | Sjp_0054000.1 | NA                               | NA       |
| HSB10kb_751 | 2     | 26841716 | 27017215 | SJC_S000537 | 421    | 140815 | -  | Sjp_0054010.1 | NA                               | NA       |
| HSB10kb_751 | 2     | 26841716 | 27017215 | SJC_S000537 | 421    | 140815 | -  | Sjp_0054020.1 | NA                               | NA       |
| HSB10kb_752 | 1     | 15382814 | 15426563 | SJC_S000538 | 2326   | 28965  | +  | Sjp_0054030.1 | NA                               | NA       |
| HSB10kb_752 | 1     | 15382814 | 15426563 | SJC_S000538 | 2326   | 28965  | +  | Sjp_0054040.1 | molecular                        | 0.50162  |

|             |       |          |          |             |       |        |    |               |                                               |          |
|-------------|-------|----------|----------|-------------|-------|--------|----|---------------|-----------------------------------------------|----------|
|             |       |          |          |             |       |        |    |               | transducer activity                           |          |
| unknown     | NA    | NA       | NA       | SJC_S000538 | NA    | NA     | NA | Sjp_0054060.1 | cellular component organization or biogenesis | NA       |
| unknown     | NA    | NA       | NA       | SJC_S000539 | NA    | NA     | NA | Sjp_0054070.1 | NA                                            | NA       |
| unknown     | NA    | NA       | NA       | SJC_S000539 | NA    | NA     | NA | Sjp_0054080.1 | catalytic activity                            | 0.035844 |
| unknown     | NA    | NA       | NA       | SJC_S000539 | NA    | NA     | NA | Sjp_0054090.1 | cellular process                              | 0.63852  |
| unknown     | NA    | NA       | NA       | SJC_S000540 | NA    | NA     | NA | Sjp_0054100.1 | binding                                       | 0.052762 |
| unknown     | NA    | NA       | NA       | SJC_S000540 | NA    | NA     | NA | Sjp_0054110.1 | NA                                            | NA       |
| HSB10kb_753 | 4     | 4089115  | 4114766  | SJC_S000540 | 49843 | 70580  | -  | Sjp_0054120.1 | NA                                            | NA       |
| HSB10kb_754 | 6     | 15115825 | 15136401 | SJC_S000541 | 6507  | 27486  | +  | Sjp_0054130.1 | catalytic activity                            | 0.035844 |
| EBR10kb_390 | "6,6" | NA       | NA       | SJC_S000541 | 27487 | 46757  | NA | Sjp_0054130.1 | catalytic activity                            | 0.035844 |
| HSB10kb_755 | 6     | 15281836 | 15299360 | SJC_S000541 | 46758 | 59278  | +  | Sjp_0054130.1 | catalytic activity                            | 0.035844 |
| HSB10kb_756 | 1     | 10433256 | 10443881 | SJC_S000542 | 15271 | 85586  | +  | Sjp_0054140.1 | catalytic activity                            | 0.035844 |
| HSB10kb_756 | 1     | 10433256 | 10443881 | SJC_S000542 | 15271 | 85586  | +  | Sjp_0054150.1 | NA                                            | NA       |
| HSB10kb_756 | 1     | 10433256 | 10443881 | SJC_S000542 | 15271 | 85586  | +  | Sjp_0054160.1 | catalytic activity                            | 0.035844 |
| unknown     | NA    | NA       | NA       | SJC_S000543 | NA    | NA     | NA | Sjp_0054170.1 | NA                                            | NA       |
| HSB10kb_757 | WZ    | 49794559 | 49811174 | SJC_S000543 | 59345 | 69600  | -  | Sjp_0054180.1 | biological regulation                         | 0.76396  |
| unknown     | NA    | NA       | NA       | SJC_S000543 | NA    | NA     | NA | Sjp_0054190.1 | NA                                            | NA       |
| unknown     | NA    | NA       | NA       | SJC_S000543 | NA    | NA     | NA | Sjp_0054200.1 | cell part                                     | 0.009037 |
| unknown     | NA    | NA       | NA       | SJC_S000543 | NA    | NA     | NA | Sjp_0054210.1 | NA                                            | NA       |
| HSB10kb_758 | WZ    | 39386799 | 39535641 | SJC_S000544 | 1225  | 131457 | +  | Sjp_0054220.1 | biological regulation                         | 0.76396  |
| HSB10kb_758 | WZ    | 39386799 | 39535641 | SJC_S000544 | 1225  | 131457 | +  | Sjp_0054230.1 | NA                                            | NA       |
| HSB10kb_758 | WZ    | 39386799 | 39535641 | SJC_S000544 | 1225  | 131457 | +  | Sjp_0054240.1 | electron carrier activity                     | NA       |
| HSB10kb_758 | WZ    | 39386799 | 39535641 | SJC_S000544 | 1225  | 131457 | +  | Sjp_0054250.1 | NA                                            | NA       |
| HSB10kb_758 | WZ    | 39386799 | 39535641 | SJC_S000544 | 1225  | 131457 | +  | Sjp_0054260.1 | catalytic activity                            | 0.035844 |
| unknown     | NA    | NA       | NA       | SJC_S000544 | NA    | NA     | NA | Sjp_0054270.1 | NA                                            | NA       |
| unknown     | NA    | NA       | NA       | SJC_S000545 | NA    | NA     | NA | Sjp_0054280.1 | cell part                                     | 0.009037 |
| unknown     | NA    | NA       | NA       | SJC_S000546 | NA    | NA     | NA | Sjp_0054290.1 | NA                                            | NA       |

|             |    |          |          |             |        |        |    |               |                      |          |
|-------------|----|----------|----------|-------------|--------|--------|----|---------------|----------------------|----------|
| unknown     | NA | NA       | NA       | SJC_S000547 | NA     | NA     | NA | Sjp_0054300.1 | metabolic process    | 0.41934  |
| unknown     | NA | NA       | NA       | SJC_S000547 | NA     | NA     | NA | Sjp_0054310.1 | NA                   | NA       |
| unknown     | NA | NA       | NA       | SJC_S000547 | NA     | NA     | NA | Sjp_0054320.1 | NA                   | NA       |
| unknown     | NA | NA       | NA       | SJC_S000547 | NA     | NA     | NA | Sjp_0054330.1 | NA                   | NA       |
| unknown     | NA | NA       | NA       | SJC_S000547 | NA     | NA     | NA | Sjp_0054340.1 | NA                   | NA       |
| HSB10kb_759 | WZ | 43880825 | 43957404 | SJC_S000548 | 10152  | 43015  | +  | Sjp_0054350.1 | reproductive process | NA       |
| unknown     | NA | NA       | NA       | SJC_S000549 | NA     | NA     | NA | Sjp_0054360.1 | NA                   | NA       |
| unknown     | NA | NA       | NA       | SJC_S000549 | NA     | NA     | NA | Sjp_0054370.1 | catalytic activity   | 0.035844 |
| HSB10kb_760 | WZ | 43681197 | 43865613 | SJC_S000549 | 30404  | 183113 | -  | Sjp_0054380.1 | binding              | 0.052762 |
| HSB10kb_760 | WZ | 43681197 | 43865613 | SJC_S000549 | 30404  | 183113 | -  | Sjp_0054390.1 | binding              | 0.052762 |
| HSB10kb_760 | WZ | 43681197 | 43865613 | SJC_S000549 | 30404  | 183113 | -  | Sjp_0054400.1 | catalytic activity   | 0.035844 |
| HSB10kb_760 | WZ | 43681197 | 43865613 | SJC_S000549 | 30404  | 183113 | -  | Sjp_0054410.1 | NA                   | NA       |
| HSB10kb_760 | WZ | 43681197 | 43865613 | SJC_S000549 | 30404  | 183113 | -  | Sjp_0054420.1 | catalytic activity   | 0.035844 |
| HSB10kb_760 | WZ | 43681197 | 43865613 | SJC_S000549 | 30404  | 183113 | -  | Sjp_0054430.1 | NA                   | NA       |
| HSB10kb_760 | WZ | 43681197 | 43865613 | SJC_S000549 | 30404  | 183113 | -  | Sjp_0054450.1 | catalytic activity   | 0.035844 |
| unknown     | NA | NA       | NA       | SJC_S000549 | NA     | NA     | NA | Sjp_0054460.1 | catalytic activity   | 0.035844 |
| unknown     | NA | NA       | NA       | SJC_S000549 | NA     | NA     | NA | Sjp_0054470.1 | catalytic activity   | 0.035844 |
| unknown     | NA | NA       | NA       | SJC_S000550 | NA     | NA     | NA | Sjp_0054480.1 | catalytic activity   | 0.035844 |
| HSB10kb_761 | 1  | 43430006 | 43649318 | SJC_S000550 | 20519  | 161086 | +  | Sjp_0054490.1 | NA                   | NA       |
| HSB10kb_761 | 1  | 43430006 | 43649318 | SJC_S000550 | 20519  | 161086 | +  | Sjp_0054500.1 | catalytic activity   | 0.035844 |
| HSB10kb_761 | 1  | 43430006 | 43649318 | SJC_S000550 | 20519  | 161086 | +  | Sjp_0054510.1 | binding              | 0.052762 |
| HSB10kb_761 | 1  | 43430006 | 43649318 | SJC_S000550 | 20519  | 161086 | +  | Sjp_0054520.1 | NA                   | NA       |
| unknown     | NA | NA       | NA       | SJC_S000551 | NA     | NA     | NA | Sjp_0054530.1 | NA                   | NA       |
| unknown     | NA | NA       | NA       | SJC_S000551 | NA     | NA     | NA | Sjp_0054540.1 | NA                   | NA       |
| HSB10kb_762 | WZ | 50050199 | 50180096 | SJC_S000551 | 103176 | 232010 | +  | Sjp_0054560.1 | NA                   | NA       |
| HSB10kb_762 | WZ | 50050199 | 50180096 | SJC_S000551 | 103176 | 232010 | +  | Sjp_0054570.1 | NA                   | NA       |
| unknown     | NA | NA       | NA       | SJC_S000552 | NA     | NA     | NA | Sjp_0054590.1 | NA                   | NA       |
| HSB10kb_763 | 5  | 5207853  | 5292045  | SJC_S000552 | 15082  | 124394 | +  | Sjp_0054600.1 | NA                   | NA       |
| HSB10kb_763 | 5  | 5207853  | 5292045  | SJC_S000552 | 15082  | 124394 | +  | Sjp_0054610.1 | NA                   | NA       |
| HSB10kb_763 | 5  | 5207853  | 5292045  | SJC_S000552 | 15082  | 124394 | +  | Sjp_0054620.1 | NA                   | NA       |
| unknown     | NA | NA       | NA       | SJC_S000552 | NA     | NA     | NA | Sjp_0054630.1 | NA                   | NA       |
| HSB10kb_764 | 6  | 5866962  | 5883534  | SJC_S000553 | 16733  | 31574  | +  | Sjp_0054640.1 | metabolic            | 0.41934  |

|             |       |          |          |             |        |        |    |               |                       |          |
|-------------|-------|----------|----------|-------------|--------|--------|----|---------------|-----------------------|----------|
|             |       |          |          |             |        |        |    |               | process               |          |
| EBR10kb_391 | "6,6" | NA       | NA       | SJC_S000553 | 31575  | 46010  | NA | Sjp_0054650.1 | NA                    | NA       |
| EBR10kb_391 | "6,6" | NA       | NA       | SJC_S000553 | 31575  | 46010  | NA | Sjp_0054660.1 | metabolic process     | 0.41934  |
| HSB10kb_765 | 6     | 5825826  | 5855617  | SJC_S000553 | 46011  | 69555  | +  | Sjp_0054660.1 | metabolic process     | 0.41934  |
| HSB10kb_765 | 6     | 5825826  | 5855617  | SJC_S000553 | 46011  | 69555  | +  | Sjp_0054670.1 | cell part             | 0.009037 |
| EBR10kb_392 | "6,6" | NA       | NA       | SJC_S000553 | 69556  | 95396  | NA | Sjp_0054680.1 | NA                    | NA       |
| HSB10kb_766 | 6     | 5900277  | 6027786  | SJC_S000553 | 95397  | 207958 | +  | Sjp_0054680.1 | NA                    | NA       |
| HSB10kb_766 | 6     | 5900277  | 6027786  | SJC_S000553 | 95397  | 207958 | +  | Sjp_0054690.1 | catalytic activity    | 0.035844 |
| unknown     | NA    | NA       | NA       | SJC_S000554 | NA     | NA     | NA | Sjp_0054700.1 | biological regulation | 0.76396  |
| unknown     | NA    | NA       | NA       | SJC_S000554 | NA     | NA     | NA | Sjp_0054710.1 | biological regulation | 0.76396  |
| unknown     | NA    | NA       | NA       | SJC_S000554 | NA     | NA     | NA | Sjp_0054720.1 | NA                    | NA       |
| unknown     | NA    | NA       | NA       | SJC_S000554 | NA     | NA     | NA | Sjp_0054730.1 | binding               | 0.052762 |
| unknown     | NA    | NA       | NA       | SJC_S000554 | NA     | NA     | NA | Sjp_0054740.1 | NA                    | NA       |
| unknown     | NA    | NA       | NA       | SJC_S000554 | NA     | NA     | NA | Sjp_0054750.1 | NA                    | NA       |
| unknown     | NA    | NA       | NA       | SJC_S000554 | NA     | NA     | NA | Sjp_0054760.1 | NA                    | NA       |
| HSB10kb_767 | 1     | 43930404 | 43991943 | SJC_S000554 | 179340 | 227792 |    | NA            | NA                    | NA       |
| unknown     | NA    | NA       | NA       | SJC_S000555 | NA     | NA     | NA | Sjp_0054770.1 | NA                    | NA       |
| unknown     | NA    | NA       | NA       | SJC_S000555 | NA     | NA     | NA | Sjp_0054780.1 | binding               | 0.052762 |
| unknown     | NA    | NA       | NA       | SJC_S000556 | NA     | NA     | NA | Sjp_0054800.1 | NA                    | NA       |
| unknown     | NA    | NA       | NA       | SJC_S000556 | NA     | NA     | NA | Sjp_0054810.1 | cell part             | 0.009037 |
| unknown     | NA    | NA       | NA       | SJC_S000556 | NA     | NA     | NA | Sjp_0054820.1 | NA                    | NA       |
| unknown     | NA    | NA       | NA       | SJC_S000556 | NA     | NA     | NA | Sjp_0054830.1 | binding               | 0.052762 |
| HSB10kb_768 | 5     | 2964501  | 3000444  | SJC_S000556 | 144674 | 178040 | -  | Sjp_0054840.1 | NA                    | NA       |
| HSB10kb_768 | 5     | 2964501  | 3000444  | SJC_S000556 | 144674 | 178040 | -  | Sjp_0054850.1 | catalytic activity    | 0.035844 |
| HSB10kb_768 | 5     | 2964501  | 3000444  | SJC_S000556 | 144674 | 178040 | -  | Sjp_0054860.1 | catalytic activity    | 0.035844 |
| unknown     | NA    | NA       | NA       | SJC_S000557 | NA     | NA     | NA | Sjp_0054870.1 | NA                    | NA       |
| unknown     | NA    | NA       | NA       | SJC_S000557 | NA     | NA     | NA | Sjp_0054880.1 | NA                    | NA       |
| unknown     | NA    | NA       | NA       | SJC_S000557 | NA     | NA     | NA | Sjp_0054890.1 | binding               | 0.052762 |
| unknown     | NA    | NA       | NA       | SJC_S000557 | NA     | NA     | NA | Sjp_0054900.1 | NA                    | NA       |
| unknown     | NA    | NA       | NA       | SJC_S000558 | NA     | NA     | NA | Sjp_0054910.1 | NA                    | NA       |



|             |    |          |          |             |       |        |    |               |                               |          |
|-------------|----|----------|----------|-------------|-------|--------|----|---------------|-------------------------------|----------|
| unknown     | NA | NA       | NA       | SJC_S000558 | NA    | NA     | NA | Sjp_0054920.1 | NA                            | NA       |
| unknown     | NA | NA       | NA       | SJC_S000559 | NA    | NA     | NA | Sjp_0054930.1 | NA                            | NA       |
| unknown     | NA | NA       | NA       | SJC_S000559 | NA    | NA     | NA | Sjp_0054940.1 | biological regulation         | 0.76396  |
| HSB10kb_769 | 1  | 12199883 | 12268566 | SJC_S000559 | 93267 | 157518 | -  | Sjp_0054950.1 | NA                            | NA       |
| unknown     | NA | NA       | NA       | SJC_S000560 | NA    | NA     | NA | Sjp_0054960.1 | biological regulation         | 0.76396  |
| unknown     | NA | NA       | NA       | SJC_S000560 | NA    | NA     | NA | Sjp_0054970.1 | NA                            | NA       |
| unknown     | NA | NA       | NA       | SJC_S000560 | NA    | NA     | NA | Sjp_0054980.1 | biological regulation         | 0.76396  |
| unknown     | NA | NA       | NA       | SJC_S000561 | NA    | NA     | NA | Sjp_0055000.1 | NA                            | NA       |
| HSB10kb_770 | 2  | 6603637  | 6678960  | SJC_S000561 | 10807 | 68078  | -  | Sjp_0055020.1 | NA                            | NA       |
| HSB10kb_770 | 2  | 6603637  | 6678960  | SJC_S000561 | 10807 | 68078  | -  | Sjp_0055030.1 | binding                       | 0.052762 |
| HSB10kb_771 | 1  | 29969385 | 29988592 | SJC_S000562 | 1137  | 21103  | +  | Sjp_0055050.1 | NA                            | NA       |
| unknown     | NA | NA       | NA       | SJC_S000562 | NA    | NA     | NA | Sjp_0055060.1 | NA                            | NA       |
| unknown     | NA | NA       | NA       | SJC_S000562 | NA    | NA     | NA | Sjp_0055070.1 | NA                            | NA       |
| unknown     | NA | NA       | NA       | SJC_S000562 | NA    | NA     | NA | Sjp_0055080.1 | NA                            | NA       |
| unknown     | NA | NA       | NA       | SJC_S000563 | NA    | NA     | NA | Sjp_0055090.1 | cell part                     | 0.009037 |
| unknown     | NA | NA       | NA       | SJC_S000564 | NA    | NA     | NA | Sjp_0055100.1 | NA                            | NA       |
| unknown     | NA | NA       | NA       | SJC_S000564 | NA    | NA     | NA | Sjp_0055110.1 | NA                            | NA       |
| HSB10kb_772 | WZ | 28376165 | 28419836 | SJC_S000565 | 3795  | 28071  | +  | Sjp_0055120.1 | NA                            | NA       |
| unknown     | NA | NA       | NA       | SJC_S000565 | NA    | NA     | NA | Sjp_0055130.1 | NA                            | NA       |
| unknown     | NA | NA       | NA       | SJC_S000565 | NA    | NA     | NA | Sjp_0055140.1 | cell part                     | 0.009037 |
| unknown     | NA | NA       | NA       | SJC_S000565 | NA    | NA     | NA | Sjp_0055150.1 | NA                            | NA       |
| unknown     | NA | NA       | NA       | SJC_S000565 | NA    | NA     | NA | Sjp_0055160.1 | NA                            | NA       |
| HSB10kb_773 | 5  | 719046   | 835583   | SJC_S000566 | 39348 | 67827  | +  | Sjp_0055170.1 | NA                            | NA       |
| unknown     | NA | NA       | NA       | SJC_S000567 | NA    | NA     | NA | Sjp_0055180.1 | molecular transducer activity | 0.50162  |
| unknown     | NA | NA       | NA       | SJC_S000567 | NA    | NA     | NA | Sjp_0055190.1 | NA                            | NA       |
| unknown     | NA | NA       | NA       | SJC_S000567 | NA    | NA     | NA | Sjp_0055200.1 | NA                            | NA       |
| unknown     | NA | NA       | NA       | SJC_S000567 | NA    | NA     | NA | Sjp_0055210.1 | NA                            | NA       |
| HSB10kb_774 | 4  | 844276   | 950799   | SJC_S000568 | 30948 | 136701 | -  | Sjp_0055220.1 | NA                            | NA       |
| HSB10kb_774 | 4  | 844276   | 950799   | SJC_S000568 | 30948 | 136701 | -  | Sjp_0055230.1 | biological                    | 0.76396  |

|             |    |          |          |             |       |        |    |               |                           |          |
|-------------|----|----------|----------|-------------|-------|--------|----|---------------|---------------------------|----------|
|             |    |          |          |             |       |        |    |               | regulation                |          |
| HSB10kb_774 | 4  | 844276   | 950799   | SJC_S000568 | 30948 | 136701 | -  | Sjp_0055240.1 | enzyme regulator activity | 0.1755   |
| HSB10kb_774 | 4  | 844276   | 950799   | SJC_S000568 | 30948 | 136701 | -  | Sjp_0055250.1 | NA                        | NA       |
| HSB10kb_775 | 1  | 57109385 | 57314224 | SJC_S000569 | 20140 | 204536 | -  | Sjp_0055260.1 | NA                        | NA       |
| HSB10kb_775 | 1  | 57109385 | 57314224 | SJC_S000569 | 20140 | 204536 | -  | Sjp_0055280.1 | cell part                 | 0.009037 |
| HSB10kb_775 | 1  | 57109385 | 57314224 | SJC_S000569 | 20140 | 204536 | -  | Sjp_0055290.1 | cell part                 | 0.009037 |
| HSB10kb_775 | 1  | 57109385 | 57314224 | SJC_S000569 | 20140 | 204536 | -  | Sjp_0055300.1 | cell part                 | 0.009037 |
| HSB10kb_775 | 1  | 57109385 | 57314224 | SJC_S000569 | 20140 | 204536 | -  | Sjp_0055310.1 | cell part                 | 0.009037 |
| HSB10kb_775 | 1  | 57109385 | 57314224 | SJC_S000569 | 20140 | 204536 | -  | Sjp_0055320.1 | NA                        | NA       |
| HSB10kb_775 | 1  | 57109385 | 57314224 | SJC_S000569 | 20140 | 204536 | -  | Sjp_0055330.1 | NA                        | NA       |
| HSB10kb_776 | 1  | 38830230 | 39065744 | SJC_S000570 | 830   | 181865 | +  | Sjp_0055340.1 | NA                        | NA       |
| HSB10kb_776 | 1  | 38830230 | 39065744 | SJC_S000570 | 830   | 181865 | +  | Sjp_0055350.1 | NA                        | NA       |
| HSB10kb_776 | 1  | 38830230 | 39065744 | SJC_S000570 | 830   | 181865 | +  | Sjp_0055360.1 | NA                        | NA       |
| HSB10kb_776 | 1  | 38830230 | 39065744 | SJC_S000570 | 830   | 181865 | +  | Sjp_0055370.1 | NA                        | NA       |
| HSB10kb_776 | 1  | 38830230 | 39065744 | SJC_S000570 | 830   | 181865 | +  | Sjp_0055380.1 | NA                        | NA       |
| HSB10kb_776 | 1  | 38830230 | 39065744 | SJC_S000570 | 830   | 181865 | +  | Sjp_0055390.1 | catalytic activity        | 0.035844 |
| HSB10kb_776 | 1  | 38830230 | 39065744 | SJC_S000570 | 830   | 181865 | +  | Sjp_0055400.1 | NA                        | NA       |
| HSB10kb_776 | 1  | 38830230 | 39065744 | SJC_S000570 | 830   | 181865 | +  | Sjp_0055410.1 | NA                        | NA       |
| unknown     | NA | NA       | NA       | SJC_S000570 | NA    | NA     | NA | Sjp_0055420.1 | NA                        | NA       |
| unknown     | NA | NA       | NA       | SJC_S000571 | NA    | NA     | NA | Sjp_0055430.1 | binding                   | 0.052762 |
| unknown     | NA | NA       | NA       | SJC_S000571 | NA    | NA     | NA | Sjp_0055440.1 | NA                        | NA       |
| unknown     | NA | NA       | NA       | SJC_S000571 | NA    | NA     | NA | Sjp_0055450.1 | NA                        | NA       |
| HSB10kb_777 | 2  | 11413523 | 11437928 | SJC_S000571 | 70581 | 108457 | +  | Sjp_0055460.1 | NA                        | NA       |
| unknown     | NA | NA       | NA       | SJC_S000571 | NA    | NA     | NA | Sjp_0055470.1 | NA                        | NA       |
| unknown     | NA | NA       | NA       | SJC_S000572 | NA    | NA     | NA | Sjp_0055480.1 | catalytic activity        | 0.035844 |
| unknown     | NA | NA       | NA       | SJC_S000572 | NA    | NA     | NA | Sjp_0055490.1 | NA                        | NA       |
| unknown     | NA | NA       | NA       | SJC_S000572 | NA    | NA     | NA | Sjp_0055500.1 | NA                        | NA       |
| unknown     | NA | NA       | NA       | SJC_S000572 | NA    | NA     | NA | Sjp_0055510.1 | biological regulation     | 0.76396  |
| unknown     | NA | NA       | NA       | SJC_S000572 | NA    | NA     | NA | Sjp_0055520.1 | NA                        | NA       |
| unknown     | NA | NA       | NA       | SJC_S000573 | NA    | NA     | NA | Sjp_0055530.1 | NA                        | NA       |
| unknown     | NA | NA       | NA       | SJC_S000574 | NA    | NA     | NA | Sjp_0055560.1 | NA                        | NA       |

|             |         |          |          |             |        |        |    |               |                                               |          |
|-------------|---------|----------|----------|-------------|--------|--------|----|---------------|-----------------------------------------------|----------|
| unknown     | NA      | NA       | NA       | SJC_S000575 | NA     | NA     | NA | Sjp_0055570.1 | NA                                            | NA       |
| unknown     | NA      | NA       | NA       | SJC_S000576 | NA     | NA     | NA | Sjp_0055580.1 | catalytic activity                            | 0.035844 |
| HSB10kb_778 | WZ      | 55894344 | 56017291 | SJC_S000578 | 32951  | 138396 | +  | Sjp_0055590.1 | catalytic activity                            | 0.035844 |
| HSB10kb_778 | WZ      | 55894344 | 56017291 | SJC_S000578 | 32951  | 138396 | +  | Sjp_0055600.1 | NA                                            | NA       |
| HSB10kb_778 | WZ      | 55894344 | 56017291 | SJC_S000578 | 32951  | 138396 | +  | Sjp_0055610.1 | NA                                            | NA       |
| EBR10kb_393 | "WZ,WZ" | NA       | NA       | SJC_S000578 | 138397 | 141096 | NA | Sjp_0055610.1 | NA                                            | NA       |
| HSB10kb_779 | WZ      | 56024881 | 56056687 | SJC_S000578 | 141097 | 168799 | -  | Sjp_0055610.1 | NA                                            | NA       |
| HSB10kb_779 | WZ      | 56024881 | 56056687 | SJC_S000578 | 141097 | 168799 | -  | Sjp_0055620.1 | NA                                            | NA       |
| HSB10kb_779 | WZ      | 56024881 | 56056687 | SJC_S000578 | 141097 | 168799 | -  | Sjp_0055630.1 | NA                                            | NA       |
| EBR10kb_394 | "WZ,WZ" | NA       | NA       | SJC_S000578 | 168800 | 175643 | NA | Sjp_0055630.1 | NA                                            | NA       |
| HSB10kb_780 | WZ      | 56062657 | 56265886 | SJC_S000578 | 175644 | 364485 | +  | Sjp_0055630.1 | NA                                            | NA       |
| HSB10kb_780 | WZ      | 56062657 | 56265886 | SJC_S000578 | 175644 | 364485 | +  | Sjp_0055640.1 | NA                                            | NA       |
| HSB10kb_780 | WZ      | 56062657 | 56265886 | SJC_S000578 | 175644 | 364485 | +  | Sjp_0055650.1 | NA                                            | NA       |
| HSB10kb_780 | WZ      | 56062657 | 56265886 | SJC_S000578 | 175644 | 364485 | +  | Sjp_0055660.1 | NA                                            | NA       |
| HSB10kb_780 | WZ      | 56062657 | 56265886 | SJC_S000578 | 175644 | 364485 | +  | Sjp_0055670.1 | cell part                                     | 0.009037 |
| HSB10kb_780 | WZ      | 56062657 | 56265886 | SJC_S000578 | 175644 | 364485 | +  | Sjp_0055680.1 | cellular component organization or biogenesis | NA       |
| HSB10kb_780 | WZ      | 56062657 | 56265886 | SJC_S000578 | 175644 | 364485 | +  | Sjp_0055690.1 | NA                                            | NA       |
| unknown     | NA      | NA       | NA       | SJC_S000578 | NA     | NA     | NA | Sjp_0055700.1 | catalytic activity                            | 0.035844 |
| unknown     | NA      | NA       | NA       | SJC_S000578 | NA     | NA     | NA | Sjp_0055710.1 | NA                                            | NA       |
| unknown     | NA      | NA       | NA       | SJC_S000579 | NA     | NA     | NA | Sjp_0055720.1 | metabolic process                             | 0.41934  |
| HSB10kb_781 | 3       | 27329043 | 27440573 | SJC_S000579 | 139859 | 277342 | +  | Sjp_0055740.1 | cellular process                              | 0.63852  |
| HSB10kb_781 | 3       | 27329043 | 27440573 | SJC_S000579 | 139859 | 277342 | +  | Sjp_0055750.1 | binding                                       | 0.052762 |
| EBR10kb_395 | "3,3"   | NA       | NA       | SJC_S000579 | 277343 | 313729 | NA | Sjp_0055760.1 | NA                                            | NA       |
| HSB10kb_782 | 3       | 27240176 | 27255231 | SJC_S000579 | 313730 | 347305 |    | NA            | NA                                            | NA       |
| unknown     | NA      | NA       | NA       | SJC_S000580 | NA     | NA     | NA | Sjp_0055770.1 | NA                                            | NA       |
| unknown     | NA      | NA       | NA       | SJC_S000580 | NA     | NA     | NA | Sjp_0055780.1 | cell part                                     | 0.009037 |
| unknown     | NA      | NA       | NA       | SJC_S000580 | NA     | NA     | NA | Sjp_0055790.1 | catalytic activity                            | 0.035844 |
| unknown     | NA      | NA       | NA       | SJC_S000580 | NA     | NA     | NA | Sjp_0055810.1 | catalytic activity                            | 0.035844 |
| unknown     | NA      | NA       | NA       | SJC_S000580 | NA     | NA     | NA | Sjp_0055820.1 | NA                                            | NA       |
| unknown     | NA      | NA       | NA       | SJC_S000580 | NA     | NA     | NA | Sjp_0055830.1 | catalytic activity                            | 0.035844 |

|             |       |          |          |             |        |        |    |               |                           |          |
|-------------|-------|----------|----------|-------------|--------|--------|----|---------------|---------------------------|----------|
| unknown     | NA    | NA       | NA       | SJC_S000580 | NA     | NA     | NA | Sjp_0055840.1 | NA                        | NA       |
| unknown     | NA    | NA       | NA       | SJC_S000580 | NA     | NA     | NA | Sjp_0055850.1 | NA                        | NA       |
| unknown     | NA    | NA       | NA       | SJC_S000580 | NA     | NA     | NA | Sjp_0055860.1 | NA                        | NA       |
| unknown     | NA    | NA       | NA       | SJC_S000580 | NA     | NA     | NA | Sjp_0055870.1 | catalytic activity        | 0.035844 |
| unknown     | NA    | NA       | NA       | SJC_S000580 | NA     | NA     | NA | Sjp_0055880.1 | catalytic activity        | 0.035844 |
| unknown     | NA    | NA       | NA       | SJC_S000580 | NA     | NA     | NA | Sjp_0055890.1 | NA                        | NA       |
| unknown     | NA    | NA       | NA       | SJC_S000580 | NA     | NA     | NA | Sjp_0055900.1 | cell part                 | 0.009037 |
| unknown     | NA    | NA       | NA       | SJC_S000580 | NA     | NA     | NA | Sjp_0055910.1 | cell part                 | 0.009037 |
| unknown     | NA    | NA       | NA       | SJC_S000580 | NA     | NA     | NA | Sjp_0055920.1 | cell part                 | 0.009037 |
| unknown     | NA    | NA       | NA       | SJC_S000581 | NA     | NA     | NA | Sjp_0055930.1 | NA                        | NA       |
| unknown     | NA    | NA       | NA       | SJC_S000581 | NA     | NA     | NA | Sjp_0055940.1 | NA                        | NA       |
| unknown     | NA    | NA       | NA       | SJC_S000581 | NA     | NA     | NA | Sjp_0055950.1 | catalytic activity        | 0.035844 |
| unknown     | NA    | NA       | NA       | SJC_S000581 | NA     | NA     | NA | Sjp_0055960.1 | NA                        | NA       |
| unknown     | NA    | NA       | NA       | SJC_S000582 | NA     | NA     | NA | Sjp_0055970.1 | NA                        | NA       |
| unknown     | NA    | NA       | NA       | SJC_S000582 | NA     | NA     | NA | Sjp_0055980.1 | NA                        | NA       |
| unknown     | NA    | NA       | NA       | SJC_S000582 | NA     | NA     | NA | Sjp_0055990.1 | enzyme regulator activity | 0.1755   |
| HSB10kb_783 | 3     | 13840184 | 13853304 | SJC_S000583 | 121    | 20306  |    | Sjp_0056000.1 | NA                        | NA       |
| HSB10kb_783 | 3     | 13840184 | 13853304 | SJC_S000583 | 121    | 20306  |    | Sjp_0056010.1 | NA                        | NA       |
| unknown     | NA    | NA       | NA       | SJC_S000583 | NA     | NA     | NA | Sjp_0056020.1 | cell part                 | 0.009037 |
| unknown     | NA    | NA       | NA       | SJC_S000583 | NA     | NA     | NA | Sjp_0056030.1 | NA                        | NA       |
| unknown     | NA    | NA       | NA       | SJC_S000584 | NA     | NA     | NA | Sjp_0056040.1 | binding                   | 0.052762 |
| unknown     | NA    | NA       | NA       | SJC_S000584 | NA     | NA     | NA | Sjp_0056050.1 | NA                        | NA       |
| HSB10kb_784 | 3     | 11687419 | 11831030 | SJC_S000584 | 42549  | 175076 | +  | Sjp_0056060.1 | NA                        | NA       |
| HSB10kb_784 | 3     | 11687419 | 11831030 | SJC_S000584 | 42549  | 175076 | +  | Sjp_0056070.1 | cell part                 | 0.009037 |
| HSB10kb_784 | 3     | 11687419 | 11831030 | SJC_S000584 | 42549  | 175076 | +  | Sjp_0056080.1 | NA                        | NA       |
| HSB10kb_784 | 3     | 11687419 | 11831030 | SJC_S000584 | 42549  | 175076 | +  | Sjp_0056090.1 | biological regulation     | 0.76396  |
| HSB10kb_784 | 3     | 11687419 | 11831030 | SJC_S000584 | 42549  | 175076 | +  | Sjp_0056100.1 | NA                        | NA       |
| EBR10kb_396 | "3,3" | NA       | NA       | SJC_S000584 | 175077 | 192418 | NA | Sjp_0056110.1 | NA                        | NA       |
| HSB10kb_785 | 3     | 11862016 | 11972596 | SJC_S000584 | 192419 | 280552 | -  | Sjp_0056110.1 | NA                        | NA       |
| HSB10kb_785 | 3     | 11862016 | 11972596 | SJC_S000584 | 192419 | 280552 | -  | Sjp_0056120.1 | NA                        | NA       |
| HSB10kb_785 | 3     | 11862016 | 11972596 | SJC_S000584 | 192419 | 280552 | -  | Sjp_0056130.1 | NA                        | NA       |

|             |    |          |          |             |        |        |    |               |                                               |          |
|-------------|----|----------|----------|-------------|--------|--------|----|---------------|-----------------------------------------------|----------|
| HSB10kb_785 | 3  | 11862016 | 11972596 | SJC_S000584 | 192419 | 280552 | -  | Sjp_0056140.1 | NA                                            | NA       |
| HSB10kb_785 | 3  | 11862016 | 11972596 | SJC_S000584 | 192419 | 280552 | -  | Sjp_0056150.1 | NA                                            | NA       |
| unknown     | NA | NA       | NA       | SJC_S000584 | NA     | NA     | NA | Sjp_0056160.1 | NA                                            | NA       |
| unknown     | NA | NA       | NA       | SJC_S000585 | NA     | NA     | NA | Sjp_0056170.1 | NA                                            | NA       |
| unknown     | NA | NA       | NA       | SJC_S000585 | NA     | NA     | NA | Sjp_0056180.1 | cellular component organization or biogenesis | NA       |
| unknown     | NA | NA       | NA       | SJC_S000585 | NA     | NA     | NA | Sjp_0056190.1 | NA                                            | NA       |
| unknown     | NA | NA       | NA       | SJC_S000585 | NA     | NA     | NA | Sjp_0056200.1 | reproductive process                          | NA       |
| unknown     | NA | NA       | NA       | SJC_S000585 | NA     | NA     | NA | Sjp_0056210.1 | catalytic activity                            | 0.035844 |
| unknown     | NA | NA       | NA       | SJC_S000585 | NA     | NA     | NA | Sjp_0056220.1 | NA                                            | NA       |
| unknown     | NA | NA       | NA       | SJC_S000585 | NA     | NA     | NA | Sjp_0056230.1 | NA                                            | NA       |
| unknown     | NA | NA       | NA       | SJC_S000585 | NA     | NA     | NA | Sjp_0056240.1 | molecular transducer activity                 | 0.50162  |
| unknown     | NA | NA       | NA       | SJC_S000585 | NA     | NA     | NA | Sjp_0056250.1 | NA                                            | NA       |
| unknown     | NA | NA       | NA       | SJC_S000585 | NA     | NA     | NA | Sjp_0056260.1 | cell part                                     | 0.009037 |
| HSB10kb_786 | WZ | 57980684 | 58141844 | SJC_S000586 | 5257   | 179443 | +  | Sjp_0056270.1 | NA                                            | NA       |
| HSB10kb_786 | WZ | 57980684 | 58141844 | SJC_S000586 | 5257   | 179443 | +  | Sjp_0056280.1 | NA                                            | NA       |
| HSB10kb_786 | WZ | 57980684 | 58141844 | SJC_S000586 | 5257   | 179443 | +  | Sjp_0056290.1 | catalytic activity                            | 0.035844 |
| HSB10kb_786 | WZ | 57980684 | 58141844 | SJC_S000586 | 5257   | 179443 | +  | Sjp_0056300.1 | NA                                            | NA       |
| HSB10kb_786 | WZ | 57980684 | 58141844 | SJC_S000586 | 5257   | 179443 | +  | Sjp_0056310.1 | NA                                            | NA       |
| unknown     | NA | NA       | NA       | SJC_S000586 | NA     | NA     | NA | Sjp_0056320.1 | biological regulation                         | 0.76396  |
| unknown     | NA | NA       | NA       | SJC_S000586 | NA     | NA     | NA | Sjp_0056330.1 | biological regulation                         | 0.76396  |
| unknown     | NA | NA       | NA       | SJC_S000586 | NA     | NA     | NA | Sjp_0056340.1 | NA                                            | NA       |
| HSB10kb_787 | 2  | 27631312 | 27855360 | SJC_S000587 | 103264 | 298047 | -  | Sjp_0056350.1 | NA                                            | NA       |
| HSB10kb_787 | 2  | 27631312 | 27855360 | SJC_S000587 | 103264 | 298047 | -  | Sjp_0056360.1 | NA                                            | NA       |
| HSB10kb_787 | 2  | 27631312 | 27855360 | SJC_S000587 | 103264 | 298047 | -  | Sjp_0056370.1 | NA                                            | NA       |
| HSB10kb_787 | 2  | 27631312 | 27855360 | SJC_S000587 | 103264 | 298047 | -  | Sjp_0056380.1 | catalytic activity                            | 0.035844 |
| HSB10kb_787 | 2  | 27631312 | 27855360 | SJC_S000587 | 103264 | 298047 | -  | Sjp_0056390.1 | NA                                            | NA       |

|             |       |          |          |             |        |        |    |               |                             |          |
|-------------|-------|----------|----------|-------------|--------|--------|----|---------------|-----------------------------|----------|
| HSB10kb_787 | 2     | 27631312 | 27855360 | SJC_S000587 | 103264 | 298047 | -  | Sjp_0056400.1 | NA                          | NA       |
| unknown     | NA    | NA       | NA       | SJC_S000588 | NA     | NA     | NA | Sjp_0056410.1 | metabolic process           | 0.41934  |
| HSB10kb_788 | 2     | 31776440 | 31894324 | SJC_S000588 | 2908   | 114654 | -  | Sjp_0056420.1 | catalytic activity          | 0.035844 |
| HSB10kb_788 | 2     | 31776440 | 31894324 | SJC_S000588 | 2908   | 114654 | -  | Sjp_0056430.1 | NA                          | NA       |
| HSB10kb_788 | 2     | 31776440 | 31894324 | SJC_S000588 | 2908   | 114654 | -  | Sjp_0056440.1 | cell part                   | 0.009037 |
| EBR10kb_397 | "2,2" | NA       | NA       | SJC_S000588 | 114655 | 115645 | NA | NA            | NA                          | NA       |
| HSB10kb_789 | 2     | 31726358 | 31761851 | SJC_S000588 | 115646 | 144906 | +  | Sjp_0056450.1 | NA                          | NA       |
| EBR10kb_398 | "2,2" | NA       | NA       | SJC_S000588 | 144907 | 228602 | NA | Sjp_0056460.1 | response to stimulus        | NA       |
| HSB10kb_790 | 2     | 31605126 | 31664395 | SJC_S000588 | 228603 | 281476 | -  | Sjp_0056460.1 | response to stimulus        | NA       |
| unknown     | NA    | NA       | NA       | SJC_S000589 | NA     | NA     | NA | Sjp_0056470.1 | NA                          | NA       |
| HSB10kb_791 | 1     | 13441691 | 13753504 | SJC_S000589 | 35269  | 364661 | +  | Sjp_0056480.1 | NA                          | NA       |
| HSB10kb_791 | 1     | 13441691 | 13753504 | SJC_S000589 | 35269  | 364661 | +  | Sjp_0056490.1 | NA                          | NA       |
| HSB10kb_791 | 1     | 13441691 | 13753504 | SJC_S000589 | 35269  | 364661 | +  | Sjp_0056500.1 | catalytic activity          | 0.035844 |
| HSB10kb_791 | 1     | 13441691 | 13753504 | SJC_S000589 | 35269  | 364661 | +  | Sjp_0056510.1 | receptor regulator activity | NA       |
| HSB10kb_791 | 1     | 13441691 | 13753504 | SJC_S000589 | 35269  | 364661 | +  | Sjp_0056520.1 | biological regulation       | 0.76396  |
| HSB10kb_791 | 1     | 13441691 | 13753504 | SJC_S000589 | 35269  | 364661 | +  | Sjp_0056530.1 | NA                          | NA       |
| HSB10kb_791 | 1     | 13441691 | 13753504 | SJC_S000589 | 35269  | 364661 | +  | Sjp_0056540.1 | NA                          | NA       |
| HSB10kb_791 | 1     | 13441691 | 13753504 | SJC_S000589 | 35269  | 364661 | +  | Sjp_0056550.1 | catalytic activity          | 0.035844 |
| HSB10kb_791 | 1     | 13441691 | 13753504 | SJC_S000589 | 35269  | 364661 | +  | Sjp_0056560.1 | NA                          | NA       |
| HSB10kb_791 | 1     | 13441691 | 13753504 | SJC_S000589 | 35269  | 364661 | +  | Sjp_0056570.1 | NA                          | NA       |
| HSB10kb_791 | 1     | 13441691 | 13753504 | SJC_S000589 | 35269  | 364661 | +  | Sjp_0056580.1 | NA                          | NA       |
| unknown     | NA    | NA       | NA       | SJC_S000590 | NA     | NA     | NA | Sjp_0056590.1 | NA                          | NA       |
| unknown     | NA    | NA       | NA       | SJC_S000590 | NA     | NA     | NA | Sjp_0056600.1 | NA                          | NA       |
| unknown     | NA    | NA       | NA       | SJC_S000590 | NA     | NA     | NA | Sjp_0056610.1 | NA                          | NA       |
| unknown     | NA    | NA       | NA       | SJC_S000590 | NA     | NA     | NA | Sjp_0056620.1 | NA                          | NA       |
| unknown     | NA    | NA       | NA       | SJC_S000590 | NA     | NA     | NA | Sjp_0056630.1 | NA                          | NA       |
| unknown     | NA    | NA       | NA       | SJC_S000590 | NA     | NA     | NA | Sjp_0056640.1 | NA                          | NA       |
| unknown     | NA    | NA       | NA       | SJC_S000590 | NA     | NA     | NA | Sjp_0056650.1 | enzyme                      | 0.1755   |

|             |         |          |          |             |       |        |    |               |                           |          |
|-------------|---------|----------|----------|-------------|-------|--------|----|---------------|---------------------------|----------|
|             |         |          |          |             |       |        |    |               | regulator activity        |          |
| unknown     | NA      | NA       | NA       | SJC_S000590 | NA    | NA     | NA | Sjp_0056660.1 | NA                        | NA       |
| unknown     | NA      | NA       | NA       | SJC_S000590 | NA    | NA     | NA | Sjp_0056670.1 | catalytic activity        | 0.035844 |
| unknown     | NA      | NA       | NA       | SJC_S000590 | NA    | NA     | NA | Sjp_0056680.1 | NA                        | NA       |
| unknown     | NA      | NA       | NA       | SJC_S000590 | NA    | NA     | NA | Sjp_0056690.1 | NA                        | NA       |
| HSB10kb_792 | 1       | 5415293  | 5685248  | SJC_S000591 | 1     | 233959 | +  | Sjp_0056700.1 | NA                        | NA       |
| HSB10kb_792 | 1       | 5415293  | 5685248  | SJC_S000591 | 1     | 233959 | +  | Sjp_0056710.1 | NA                        | NA       |
| HSB10kb_792 | 1       | 5415293  | 5685248  | SJC_S000591 | 1     | 233959 | +  | Sjp_0056720.1 | NA                        | NA       |
| HSB10kb_792 | 1       | 5415293  | 5685248  | SJC_S000591 | 1     | 233959 | +  | Sjp_0056730.1 | catalytic activity        | 0.035844 |
| HSB10kb_792 | 1       | 5415293  | 5685248  | SJC_S000591 | 1     | 233959 | +  | Sjp_0056740.1 | catalytic activity        | 0.035844 |
| HSB10kb_792 | 1       | 5415293  | 5685248  | SJC_S000591 | 1     | 233959 | +  | Sjp_0056750.1 | NA                        | NA       |
| HSB10kb_792 | 1       | 5415293  | 5685248  | SJC_S000591 | 1     | 233959 | +  | Sjp_0056760.1 | NA                        | NA       |
| HSB10kb_792 | 1       | 5415293  | 5685248  | SJC_S000591 | 1     | 233959 | +  | Sjp_0056770.1 | NA                        | NA       |
| HSB10kb_792 | 1       | 5415293  | 5685248  | SJC_S000591 | 1     | 233959 | +  | Sjp_0056780.1 | catalytic activity        | 0.035844 |
| HSB10kb_792 | 1       | 5415293  | 5685248  | SJC_S000591 | 1     | 233959 | +  | Sjp_0056790.1 | NA                        | NA       |
| HSB10kb_792 | 1       | 5415293  | 5685248  | SJC_S000591 | 1     | 233959 | +  | Sjp_0056800.1 | biological regulation     | 0.76396  |
| unknown     | NA      | NA       | NA       | SJC_S000591 | NA    | NA     | NA | Sjp_0056810.1 | response to stimulus      | NA       |
| unknown     | NA      | NA       | NA       | SJC_S000592 | NA    | NA     | NA | Sjp_0056820.1 | NA                        | NA       |
| HSB10kb_793 | WZ      | 22195283 | 22343479 | SJC_S000592 | 22526 | 41305  | +  | Sjp_0056830.1 | catalytic activity        | 0.035844 |
| unknown     | NA      | NA       | NA       | SJC_S000593 | NA    | NA     | NA | Sjp_0056840.1 | NA                        | NA       |
| HSB10kb_794 | WZ      | 24169558 | 24185191 | SJC_S000594 | 662   | 12944  | -  | Sjp_0056850.1 | catalytic activity        | 0.035844 |
| EBR10kb_399 | "WZ,WZ" | NA       | NA       | SJC_S000594 | 12945 | 17514  | NA | Sjp_0056850.1 | catalytic activity        | 0.035844 |
| EBR10kb_399 | "WZ,WZ" | NA       | NA       | SJC_S000594 | 12945 | 17514  | NA | Sjp_0056860.1 | multi-organism process    | NA       |
| HSB10kb_795 | WZ      | 23871818 | 23919235 | SJC_S000594 | 17515 | 106539 | -  | Sjp_0056870.1 | catalytic activity        | 0.035844 |
| HSB10kb_795 | WZ      | 23871818 | 23919235 | SJC_S000594 | 17515 | 106539 | -  | Sjp_0056880.1 | electron carrier activity | NA       |
| HSB10kb_795 | WZ      | 23871818 | 23919235 | SJC_S000594 | 17515 | 106539 | -  | Sjp_0056890.1 | multi-organism process    | NA       |
| HSB10kb_795 | WZ      | 23871818 | 23919235 | SJC_S000594 | 17515 | 106539 | -  | Sjp_0056900.1 | multi-organism process    | NA       |

|             |         |          |          |             |        |        |    |               |                               |          |
|-------------|---------|----------|----------|-------------|--------|--------|----|---------------|-------------------------------|----------|
| EBR10kb_400 | "WZ,WZ" | NA       | NA       | SJC_S000594 | 106540 | 215132 | NA | Sjp_0056910.1 | NA                            | NA       |
| EBR10kb_400 | "WZ,WZ" | NA       | NA       | SJC_S000594 | 106540 | 215132 | NA | Sjp_0056920.1 | NA                            | NA       |
| EBR10kb_400 | "WZ,WZ" | NA       | NA       | SJC_S000594 | 106540 | 215132 | NA | Sjp_0056930.1 | catalytic activity            | 0.035844 |
| HSB10kb_796 | WZ      | 24226272 | 24291961 | SJC_S000594 | 215133 | 243711 | +  | Sjp_0056930.1 | catalytic activity            | 0.035844 |
| HSB10kb_796 | WZ      | 24226272 | 24291961 | SJC_S000594 | 215133 | 243711 | +  | Sjp_0056940.1 | molecular transducer activity | 0.50162  |
| HSB10kb_796 | WZ      | 24226272 | 24291961 | SJC_S000594 | 215133 | 243711 | +  | Sjp_0056950.1 | catalytic activity            | 0.035844 |
| unknown     | NA      | NA       | NA       | SJC_S000594 | NA     | NA     | NA | Sjp_0056960.1 | NA                            | NA       |
| unknown     | NA      | NA       | NA       | SJC_S000595 | NA     | NA     | NA | Sjp_0056970.1 | NA                            | NA       |
| unknown     | NA      | NA       | NA       | SJC_S000595 | NA     | NA     | NA | Sjp_0056980.1 | cell part                     | 0.009037 |
| unknown     | NA      | NA       | NA       | SJC_S000595 | NA     | NA     | NA | Sjp_0056990.1 | NA                            | NA       |
| unknown     | NA      | NA       | NA       | SJC_S000595 | NA     | NA     | NA | Sjp_0057000.1 | NA                            | NA       |
| unknown     | NA      | NA       | NA       | SJC_S000596 | NA     | NA     | NA | Sjp_0057020.1 | NA                            | NA       |
| unknown     | NA      | NA       | NA       | SJC_S000596 | NA     | NA     | NA | Sjp_0057030.1 | NA                            | NA       |
| unknown     | NA      | NA       | NA       | SJC_S000597 | NA     | NA     | NA | Sjp_0057040.1 | NA                            | NA       |
| unknown     | NA      | NA       | NA       | SJC_S000597 | NA     | NA     | NA | Sjp_0057050.1 | NA                            | NA       |
| unknown     | NA      | NA       | NA       | SJC_S000597 | NA     | NA     | NA | Sjp_0057060.1 | NA                            | NA       |
| unknown     | NA      | NA       | NA       | SJC_S000598 | NA     | NA     | NA | Sjp_0057070.1 | NA                            | NA       |
| unknown     | NA      | NA       | NA       | SJC_S000598 | NA     | NA     | NA | Sjp_0057080.1 | NA                            | NA       |
| unknown     | NA      | NA       | NA       | SJC_S000599 | NA     | NA     | NA | Sjp_0057090.1 | cellular process              | 0.63852  |
| unknown     | NA      | NA       | NA       | SJC_S000599 | NA     | NA     | NA | Sjp_0057100.1 | NA                            | NA       |
| unknown     | NA      | NA       | NA       | SJC_S000600 | NA     | NA     | NA | Sjp_0057110.1 | establishment of localization | NA       |
| unknown     | NA      | NA       | NA       | SJC_S000600 | NA     | NA     | NA | Sjp_0057120.1 | biological regulation         | 0.76396  |
| unknown     | NA      | NA       | NA       | SJC_S000600 | NA     | NA     | NA | Sjp_0057130.1 | NA                            | NA       |
| HSB10kb_797 | 1       | 9358249  | 9384911  | SJC_S000601 | 121    | 65114  | -  | Sjp_0057140.1 | NA                            | NA       |
| HSB10kb_797 | 1       | 9358249  | 9384911  | SJC_S000601 | 121    | 65114  | -  | Sjp_0057150.1 | catalytic activity            | 0.035844 |
| HSB10kb_797 | 1       | 9358249  | 9384911  | SJC_S000601 | 121    | 65114  | -  | Sjp_0057160.1 | cell part                     | 0.009037 |
| HSB10kb_798 | WZ      | 24016187 | 24080364 | SJC_S000602 | 3370   | 41335  | +  | Sjp_0057170.1 | binding                       | 0.052762 |
| unknown     | NA      | NA       | NA       | SJC_S000602 | NA     | NA     | NA | Sjp_0057180.1 | electron carrier activity     | NA       |
| HSB10kb_799 | 2       | 34297639 | 34318288 | SJC_S000603 | 6865   | 34490  | -  | Sjp_0057190.1 | NA                            | NA       |



|             |       |          |          |             |        |        |    |               |                       |          |
|-------------|-------|----------|----------|-------------|--------|--------|----|---------------|-----------------------|----------|
| unknown     | NA    | NA       | NA       | SJC_S000603 | NA     | NA     | NA | Sjp_0057200.1 | NA                    | NA       |
| unknown     | NA    | NA       | NA       | SJC_S000604 | NA     | NA     | NA | Sjp_0057210.1 | catalytic activity    | 0.035844 |
| unknown     | NA    | NA       | NA       | SJC_S000604 | NA     | NA     | NA | Sjp_0057220.1 | NA                    | NA       |
| unknown     | NA    | NA       | NA       | SJC_S000604 | NA     | NA     | NA | Sjp_0057230.1 | cell part             | 0.009037 |
| HSB10kb_800 | 3     | 3203778  | 3235957  | SJC_S000606 | 5038   | 34211  | +  | NA            | NA                    | NA       |
| unknown     | NA    | NA       | NA       | SJC_S000607 | NA     | NA     | NA | Sjp_0057250.1 | NA                    | NA       |
| HSB10kb_801 | WZ    | 11238520 | 11330357 | SJC_S000608 | 14678  | 125829 | -  | Sjp_0057260.1 | transporter activity  | 0.782    |
| HSB10kb_801 | WZ    | 11238520 | 11330357 | SJC_S000608 | 14678  | 125829 | -  | Sjp_0057270.1 | catalytic activity    | 0.035844 |
| unknown     | NA    | NA       | NA       | SJC_S000610 | NA     | NA     | NA | Sjp_0057280.1 | cell part             | 0.009037 |
| unknown     | NA    | NA       | NA       | SJC_S000610 | NA     | NA     | NA | Sjp_0057290.1 | catalytic activity    | 0.035844 |
| unknown     | NA    | NA       | NA       | SJC_S000612 | NA     | NA     | NA | Sjp_0057300.1 | immune system process | NA       |
| HSB10kb_802 | 4     | 27686193 | 27749488 | SJC_S000613 | 27612  | 72932  | -  | NA            | NA                    | NA       |
| unknown     | NA    | NA       | NA       | SJC_S000614 | NA     | NA     | NA | Sjp_0057320.1 | NA                    | NA       |
| unknown     | NA    | NA       | NA       | SJC_S000615 | NA     | NA     | NA | Sjp_0057330.1 | binding               | 0.052762 |
| unknown     | NA    | NA       | NA       | SJC_S000615 | NA     | NA     | NA | Sjp_0057340.1 | NA                    | NA       |
| unknown     | NA    | NA       | NA       | SJC_S000615 | NA     | NA     | NA | Sjp_0057350.1 | NA                    | NA       |
| unknown     | NA    | NA       | NA       | SJC_S000615 | NA     | NA     | NA | Sjp_0057360.1 | cell part             | 0.009037 |
| HSB10kb_803 | 1     | 41031745 | 41076610 | SJC_S000616 | 402    | 100261 | +  | Sjp_0057370.1 | NA                    | NA       |
| HSB10kb_803 | 1     | 41031745 | 41076610 | SJC_S000616 | 402    | 100261 | +  | Sjp_0057380.1 | NA                    | NA       |
| HSB10kb_803 | 1     | 41031745 | 41076610 | SJC_S000616 | 402    | 100261 | +  | Sjp_0057390.1 | transporter activity  | 0.782    |
| HSB10kb_803 | 1     | 41031745 | 41076610 | SJC_S000616 | 402    | 100261 | +  | Sjp_0057400.1 | transporter activity  | 0.782    |
| HSB10kb_803 | 1     | 41031745 | 41076610 | SJC_S000616 | 402    | 100261 | +  | Sjp_0057410.1 | NA                    | NA       |
| EBR10kb_401 | "1,1" | NA       | NA       | SJC_S000616 | 100262 | 124278 | NA | Sjp_0057410.1 | NA                    | NA       |
| EBR10kb_401 | "1,1" | NA       | NA       | SJC_S000616 | 100262 | 124278 | NA | Sjp_0057420.1 | NA                    | NA       |
| EBR10kb_401 | "1,1" | NA       | NA       | SJC_S000616 | 100262 | 124278 | NA | Sjp_0057430.1 | NA                    | NA       |
| HSB10kb_804 | 1     | 41156197 | 41185280 | SJC_S000616 | 124279 | 141852 | +  | Sjp_0057440.1 | biological regulation | 0.76396  |
| unknown     | NA    | NA       | NA       | SJC_S000617 | NA     | NA     | NA | Sjp_0057450.1 | NA                    | NA       |
| HSB10kb_805 | 2     | 19368740 | 19460092 | SJC_S000617 | 210871 | 278348 | -  | Sjp_0057460.1 | NA                    | NA       |
| HSB10kb_805 | 2     | 19368740 | 19460092 | SJC_S000617 | 210871 | 278348 | -  | Sjp_0057470.1 | NA                    | NA       |

|             |    |          |          |             |        |        |    |               |                                  |          |
|-------------|----|----------|----------|-------------|--------|--------|----|---------------|----------------------------------|----------|
| HSB10kb_805 | 2  | 19368740 | 19460092 | SJC_S000617 | 210871 | 278348 | -  | Sjp_0057480.1 | transcription regulator activity | NA       |
| HSB10kb_805 | 2  | 19368740 | 19460092 | SJC_S000617 | 210871 | 278348 | -  | Sjp_0057490.1 | transcription regulator activity | NA       |
| HSB10kb_805 | 2  | 19368740 | 19460092 | SJC_S000617 | 210871 | 278348 | -  | Sjp_0057500.1 | biological regulation            | 0.76396  |
| unknown     | NA | NA       | NA       | SJC_S000617 | NA     | NA     | NA | Sjp_0057510.1 | NA                               | NA       |
| unknown     | NA | NA       | NA       | SJC_S000618 | NA     | NA     | NA | Sjp_0057520.1 | NA                               | NA       |
| unknown     | NA | NA       | NA       | SJC_S000618 | NA     | NA     | NA | Sjp_0057530.1 | NA                               | NA       |
| unknown     | NA | NA       | NA       | SJC_S000618 | NA     | NA     | NA | Sjp_0057540.1 | NA                               | NA       |
| unknown     | NA | NA       | NA       | SJC_S000618 | NA     | NA     | NA | Sjp_0057550.1 | NA                               | NA       |
| unknown     | NA | NA       | NA       | SJC_S000618 | NA     | NA     | NA | Sjp_0057560.1 | NA                               | NA       |
| unknown     | NA | NA       | NA       | SJC_S000618 | NA     | NA     | NA | Sjp_0057570.1 | NA                               | NA       |
| unknown     | NA | NA       | NA       | SJC_S000618 | NA     | NA     | NA | Sjp_0057580.1 | NA                               | NA       |
| unknown     | NA | NA       | NA       | SJC_S000618 | NA     | NA     | NA | Sjp_0057590.1 | catalytic activity               | 0.035844 |
| unknown     | NA | NA       | NA       | SJC_S000618 | NA     | NA     | NA | Sjp_0057600.1 | NA                               | NA       |
| unknown     | NA | NA       | NA       | SJC_S000619 | NA     | NA     | NA | Sjp_0057610.1 | NA                               | NA       |
| unknown     | NA | NA       | NA       | SJC_S000619 | NA     | NA     | NA | Sjp_0057620.1 | cellular process                 | 0.63852  |
| unknown     | NA | NA       | NA       | SJC_S000619 | NA     | NA     | NA | Sjp_0057630.1 | NA                               | NA       |
| unknown     | NA | NA       | NA       | SJC_S000619 | NA     | NA     | NA | Sjp_0057640.1 | binding                          | 0.052762 |
| unknown     | NA | NA       | NA       | SJC_S000620 | NA     | NA     | NA | Sjp_0057650.1 | NA                               | NA       |
| unknown     | NA | NA       | NA       | SJC_S000620 | NA     | NA     | NA | Sjp_0057660.1 | NA                               | NA       |
| unknown     | NA | NA       | NA       | SJC_S000620 | NA     | NA     | NA | Sjp_0057670.1 | NA                               | NA       |
| unknown     | NA | NA       | NA       | SJC_S000620 | NA     | NA     | NA | Sjp_0057680.1 | NA                               | NA       |
| unknown     | NA | NA       | NA       | SJC_S000620 | NA     | NA     | NA | Sjp_0057690.1 | NA                               | NA       |
| unknown     | NA | NA       | NA       | SJC_S000620 | NA     | NA     | NA | Sjp_0057700.1 | NA                               | NA       |
| unknown     | NA | NA       | NA       | SJC_S000620 | NA     | NA     | NA | Sjp_0057710.1 | catalytic activity               | 0.035844 |
| unknown     | NA | NA       | NA       | SJC_S000620 | NA     | NA     | NA | Sjp_0057720.1 | NA                               | NA       |
| HSB10kb_806 | 1  | 35513615 | 35537799 | SJC_S000620 | 273879 | 298463 | -  | Sjp_0057730.1 | NA                               | NA       |
| HSB10kb_807 | 1  | 22306575 | 22444096 | SJC_S000621 | 7804   | 126319 | -  | Sjp_0057740.1 | binding                          | 0.052762 |
| HSB10kb_807 | 1  | 22306575 | 22444096 | SJC_S000621 | 7804   | 126319 | -  | Sjp_0057750.1 | NA                               | NA       |
| HSB10kb_807 | 1  | 22306575 | 22444096 | SJC_S000621 | 7804   | 126319 | -  | Sjp_0057760.1 | NA                               | NA       |

|             |       |          |          |             |        |        |    |               |                       |          |
|-------------|-------|----------|----------|-------------|--------|--------|----|---------------|-----------------------|----------|
| HSB10kb_807 | 1     | 22306575 | 22444096 | SJC_S000621 | 7804   | 126319 | -  | Sjp_0057770.1 | NA                    | NA       |
| EBR10kb_402 | "1,1" | NA       | NA       | SJC_S000621 | 126320 | 202222 | NA | Sjp_0057780.1 | binding               | 0.052762 |
| EBR10kb_402 | "1,1" | NA       | NA       | SJC_S000621 | 126320 | 202222 | NA | Sjp_0057790.1 | NA                    | NA       |
| EBR10kb_402 | "1,1" | NA       | NA       | SJC_S000621 | 126320 | 202222 | NA | Sjp_0057800.1 | NA                    | NA       |
| HSB10kb_808 | 1     | 22205174 | 22226729 | SJC_S000621 | 202223 | 232390 | +  | Sjp_0057800.1 | NA                    | NA       |
| unknown     | NA    | NA       | NA       | SJC_S000622 | NA     | NA     | NA | Sjp_0057810.1 | NA                    | NA       |
| unknown     | NA    | NA       | NA       | SJC_S000623 | NA     | NA     | NA | Sjp_0057820.1 | NA                    | NA       |
| unknown     | NA    | NA       | NA       | SJC_S000623 | NA     | NA     | NA | Sjp_0057830.1 | NA                    | NA       |
| unknown     | NA    | NA       | NA       | SJC_S000623 | NA     | NA     | NA | Sjp_0057840.1 | NA                    | NA       |
| unknown     | NA    | NA       | NA       | SJC_S000623 | NA     | NA     | NA | Sjp_0057850.1 | NA                    | NA       |
| unknown     | NA    | NA       | NA       | SJC_S000623 | NA     | NA     | NA | Sjp_0057860.1 | NA                    | NA       |
| unknown     | NA    | NA       | NA       | SJC_S000623 | NA     | NA     | NA | Sjp_0057870.1 | NA                    | NA       |
| unknown     | NA    | NA       | NA       | SJC_S000624 | NA     | NA     | NA | Sjp_0057880.1 | catalytic activity    | 0.035844 |
| unknown     | NA    | NA       | NA       | SJC_S000624 | NA     | NA     | NA | Sjp_0057890.1 | catalytic activity    | 0.035844 |
| unknown     | NA    | NA       | NA       | SJC_S000624 | NA     | NA     | NA | Sjp_0057900.1 | biological regulation | 0.76396  |
| HSB10kb_809 | 1     | 2316625  | 2400069  | SJC_S000625 | 15089  | 100884 | -  | Sjp_0057910.1 | binding               | 0.052762 |
| HSB10kb_809 | 1     | 2316625  | 2400069  | SJC_S000625 | 15089  | 100884 | -  | Sjp_0057920.1 | NA                    | NA       |
| HSB10kb_809 | 1     | 2316625  | 2400069  | SJC_S000625 | 15089  | 100884 | -  | Sjp_0057930.1 | NA                    | NA       |
| HSB10kb_809 | 1     | 2316625  | 2400069  | SJC_S000625 | 15089  | 100884 | -  | Sjp_0057940.1 | catalytic activity    | 0.035844 |
| unknown     | NA    | NA       | NA       | SJC_S000626 | NA     | NA     | NA | Sjp_0057950.1 | cell part             | 0.009037 |
| unknown     | NA    | NA       | NA       | SJC_S000626 | NA     | NA     | NA | Sjp_0057960.1 | cell part             | 0.009037 |
| HSB10kb_810 | 1     | 9091740  | 9238366  | SJC_S000627 | 43146  | 217891 | +  | Sjp_0057970.1 | NA                    | NA       |
| HSB10kb_810 | 1     | 9091740  | 9238366  | SJC_S000627 | 43146  | 217891 | +  | Sjp_0057980.1 | NA                    | NA       |
| HSB10kb_810 | 1     | 9091740  | 9238366  | SJC_S000627 | 43146  | 217891 | +  | Sjp_0057990.1 | NA                    | NA       |
| HSB10kb_810 | 1     | 9091740  | 9238366  | SJC_S000627 | 43146  | 217891 | +  | Sjp_0058010.1 | NA                    | NA       |
| HSB10kb_811 | 1     | 52606014 | 52617216 | SJC_S000628 | 25     | 18142  |    | Sjp_0058020.1 | NA                    | NA       |
| EBR10kb_403 | "1,1" | NA       | NA       | SJC_S000628 | 18143  | 19572  | NA | Sjp_0058020.1 | NA                    | NA       |
| HSB10kb_812 | 1     | 52892034 | 52965588 | SJC_S000628 | 19573  | 92300  | +  | Sjp_0058020.1 | NA                    | NA       |
| HSB10kb_812 | 1     | 52892034 | 52965588 | SJC_S000628 | 19573  | 92300  | +  | Sjp_0058030.1 | NA                    | NA       |
| EBR10kb_404 | "1,1" | NA       | NA       | SJC_S000628 | 92301  | 103234 | NA | Sjp_0058040.1 | NA                    | NA       |
| HSB10kb_813 | 1     | 52770533 | 52878494 | SJC_S000628 | 103235 | 199508 | -  | Sjp_0058040.1 | NA                    | NA       |
| HSB10kb_813 | 1     | 52770533 | 52878494 | SJC_S000628 | 103235 | 199508 | -  | Sjp_0058050.1 | biological regulation | 0.76396  |

|             |        |          |          |             |        |        |    |               |                       |          |
|-------------|--------|----------|----------|-------------|--------|--------|----|---------------|-----------------------|----------|
| HSB10kb_813 | 1      | 52770533 | 52878494 | SJC_S000628 | 103235 | 199508 | -  | Sjp_0058060.1 | NA                    | NA       |
| unknown     | NA     | NA       | NA       | SJC_S000629 | NA     | NA     | NA | Sjp_0058070.1 | binding               | 0.052762 |
| unknown     | NA     | NA       | NA       | SJC_S000629 | NA     | NA     | NA | Sjp_0058080.1 | NA                    | NA       |
| unknown     | NA     | NA       | NA       | SJC_S000629 | NA     | NA     | NA | Sjp_0058090.1 | NA                    | NA       |
| unknown     | NA     | NA       | NA       | SJC_S000629 | NA     | NA     | NA | Sjp_0058100.1 | catalytic activity    | 0.035844 |
| unknown     | NA     | NA       | NA       | SJC_S000629 | NA     | NA     | NA | Sjp_0058110.1 | NA                    | NA       |
| unknown     | NA     | NA       | NA       | SJC_S000629 | NA     | NA     | NA | Sjp_0058120.1 | cellular process      | 0.63852  |
| unknown     | NA     | NA       | NA       | SJC_S000630 | NA     | NA     | NA | Sjp_0058130.1 | catalytic activity    | 0.035844 |
| HSB10kb_814 | 4      | 11899722 | 11918638 | SJC_S000630 | 20488  | 37202  | -  | Sjp_0058140.1 | NA                    | NA       |
| EBR10kb_405 | "4,3"  | NA       | NA       | SJC_S000630 | 37203  | 47120  | NA | Sjp_0058140.1 | NA                    | NA       |
| EBR10kb_405 | "4,3"  | NA       | NA       | SJC_S000630 | 37203  | 47120  | NA | Sjp_0058150.1 | NA                    | NA       |
| HSB10kb_815 | 3      | 22521578 | 22560768 | SJC_S000630 | 47121  | 88149  | +  | Sjp_0058160.1 | catalytic activity    | 0.035844 |
| HSB10kb_815 | 3      | 22521578 | 22560768 | SJC_S000630 | 47121  | 88149  | +  | Sjp_0058170.1 | cell part             | 0.009037 |
| EBR10kb_406 | "3,WZ" | NA       | NA       | SJC_S000630 | 88150  | 120360 | NA | Sjp_0058170.1 | cell part             | 0.009037 |
| EBR10kb_406 | "3,WZ" | NA       | NA       | SJC_S000630 | 88150  | 120360 | NA | Sjp_0058180.1 | cell part             | 0.009037 |
| EBR10kb_406 | "3,WZ" | NA       | NA       | SJC_S000630 | 88150  | 120360 | NA | Sjp_0058190.1 | NA                    | NA       |
| HSB10kb_816 | WZ     | 45715784 | 45748630 | SJC_S000630 | 120361 | 152213 | +  | Sjp_0058190.1 | NA                    | NA       |
| unknown     | NA     | NA       | NA       | SJC_S000631 | NA     | NA     | NA | Sjp_0058200.1 | cell part             | 0.009037 |
| HSB10kb_817 | 7      | 9111782  | 9162264  | SJC_S000631 | 20151  | 81093  | -  | Sjp_0058210.1 | NA                    | NA       |
| HSB10kb_817 | 7      | 9111782  | 9162264  | SJC_S000631 | 20151  | 81093  | -  | Sjp_0058220.1 | catalytic activity    | 0.035844 |
| HSB10kb_817 | 7      | 9111782  | 9162264  | SJC_S000631 | 20151  | 81093  | -  | Sjp_0058230.1 | NA                    | NA       |
| HSB10kb_817 | 7      | 9111782  | 9162264  | SJC_S000631 | 20151  | 81093  | -  | Sjp_0058240.1 | NA                    | NA       |
| unknown     | NA     | NA       | NA       | SJC_S000631 | NA     | NA     | NA | Sjp_0058250.1 | binding               | 0.052762 |
| unknown     | NA     | NA       | NA       | SJC_S000632 | NA     | NA     | NA | Sjp_0058260.1 | NA                    | NA       |
| HSB10kb_818 | 6      | 17900361 | 17946592 | SJC_S000632 | 16902  | 86155  | -  | Sjp_0058270.1 | biological regulation | 0.76396  |
| HSB10kb_818 | 6      | 17900361 | 17946592 | SJC_S000632 | 16902  | 86155  | -  | Sjp_0058280.1 | catalytic activity    | 0.035844 |
| unknown     | NA     | NA       | NA       | SJC_S000632 | NA     | NA     | NA | Sjp_0058300.1 | NA                    | NA       |
| unknown     | NA     | NA       | NA       | SJC_S000632 | NA     | NA     | NA | Sjp_0058310.1 | NA                    | NA       |
| HSB10kb_819 | 7      | 5487294  | 5642828  | SJC_S000633 | 3354   | 171996 | -  | Sjp_0058320.1 | NA                    | NA       |
| HSB10kb_819 | 7      | 5487294  | 5642828  | SJC_S000633 | 3354   | 171996 | -  | Sjp_0058330.1 | NA                    | NA       |
| HSB10kb_819 | 7      | 5487294  | 5642828  | SJC_S000633 | 3354   | 171996 | -  | Sjp_0058340.1 | NA                    | NA       |
| HSB10kb_819 | 7      | 5487294  | 5642828  | SJC_S000633 | 3354   | 171996 | -  | Sjp_0058350.1 | NA                    | NA       |
| HSB10kb_819 | 7      | 5487294  | 5642828  | SJC_S000633 | 3354   | 171996 | -  | Sjp_0058360.1 | NA                    | NA       |

|             |       |          |          |             |       |        |    |               |                                               |          |
|-------------|-------|----------|----------|-------------|-------|--------|----|---------------|-----------------------------------------------|----------|
| HSB10kb_819 | 7     | 5487294  | 5642828  | SJC_S000633 | 3354  | 171996 | -  | Sjp_0058370.1 | catalytic activity                            | 0.035844 |
| unknown     | NA    | NA       | NA       | SJC_S000634 | NA    | NA     | NA | Sjp_0058390.1 | NA                                            | NA       |
| unknown     | NA    | NA       | NA       | SJC_S000635 | NA    | NA     | NA | Sjp_0058400.1 | NA                                            | NA       |
| unknown     | NA    | NA       | NA       | SJC_S000635 | NA    | NA     | NA | Sjp_0058410.1 | NA                                            | NA       |
| unknown     | NA    | NA       | NA       | SJC_S000635 | NA    | NA     | NA | Sjp_0058420.1 | metabolic process                             | 0.41934  |
| unknown     | NA    | NA       | NA       | SJC_S000635 | NA    | NA     | NA | Sjp_0058430.1 | metabolic process                             | 0.41934  |
| unknown     | NA    | NA       | NA       | SJC_S000635 | NA    | NA     | NA | Sjp_0058440.1 | metabolic process                             | 0.41934  |
| unknown     | NA    | NA       | NA       | SJC_S000635 | NA    | NA     | NA | Sjp_0058450.1 | metabolic process                             | 0.41934  |
| unknown     | NA    | NA       | NA       | SJC_S000635 | NA    | NA     | NA | Sjp_0058460.1 | NA                                            | NA       |
| unknown     | NA    | NA       | NA       | SJC_S000635 | NA    | NA     | NA | Sjp_0058470.1 | metabolic process                             | 0.41934  |
| unknown     | NA    | NA       | NA       | SJC_S000636 | NA    | NA     | NA | Sjp_0058480.1 | NA                                            | NA       |
| unknown     | NA    | NA       | NA       | SJC_S000636 | NA    | NA     | NA | Sjp_0058490.1 | NA                                            | NA       |
| unknown     | NA    | NA       | NA       | SJC_S000636 | NA    | NA     | NA | Sjp_0058500.1 | NA                                            | NA       |
| unknown     | NA    | NA       | NA       | SJC_S000636 | NA    | NA     | NA | Sjp_0058510.1 | NA                                            | NA       |
| unknown     | NA    | NA       | NA       | SJC_S000636 | NA    | NA     | NA | Sjp_0058520.1 | enzyme regulator activity                     | 0.1755   |
| unknown     | NA    | NA       | NA       | SJC_S000636 | NA    | NA     | NA | Sjp_0058530.1 | NA                                            | NA       |
| unknown     | NA    | NA       | NA       | SJC_S000636 | NA    | NA     | NA | Sjp_0058540.1 | NA                                            | NA       |
| unknown     | NA    | NA       | NA       | SJC_S000636 | NA    | NA     | NA | Sjp_0058550.1 | NA                                            | NA       |
| unknown     | NA    | NA       | NA       | SJC_S000636 | NA    | NA     | NA | Sjp_0058560.1 | protein binding transcription factor activity | NA       |
| unknown     | NA    | NA       | NA       | SJC_S000637 | NA    | NA     | NA | Sjp_0058570.1 | binding                                       | 0.052762 |
| unknown     | NA    | NA       | NA       | SJC_S000637 | NA    | NA     | NA | Sjp_0058580.1 | NA                                            | NA       |
| HSB10kb_820 | 1     | 31166008 | 31186892 | SJC_S000638 | 16836 | 31352  | +  | Sjp_0058590.1 | NA                                            | NA       |
| HSB10kb_820 | 1     | 31166008 | 31186892 | SJC_S000638 | 16836 | 31352  | +  | Sjp_0058600.1 | NA                                            | NA       |
| EBR10kb_407 | "1,1" | NA       | NA       | SJC_S000638 | 31353 | 85770  | NA | NA            | NA                                            | NA       |
| HSB10kb_821 | 1     | 31206875 | 31343943 | SJC_S000638 | 85771 | 206150 | -  | Sjp_0058620.1 | NA                                            | NA       |

|             |       |          |          |             |       |        |    |               |                               |          |
|-------------|-------|----------|----------|-------------|-------|--------|----|---------------|-------------------------------|----------|
| HSB10kb_821 | 1     | 31206875 | 31343943 | SJC_S000638 | 85771 | 206150 | -  | Sjp_0058630.1 | NA                            | NA       |
| HSB10kb_821 | 1     | 31206875 | 31343943 | SJC_S000638 | 85771 | 206150 | -  | Sjp_0058640.1 | cell part                     | 0.009037 |
| HSB10kb_821 | 1     | 31206875 | 31343943 | SJC_S000638 | 85771 | 206150 | -  | Sjp_0058650.1 | NA                            | NA       |
| HSB10kb_821 | 1     | 31206875 | 31343943 | SJC_S000638 | 85771 | 206150 | -  | Sjp_0058660.1 | establishment of localization | NA       |
| unknown     | NA    | NA       | NA       | SJC_S000638 | NA    | NA     | NA | Sjp_0058670.1 | NA                            | NA       |
| HSB10kb_822 | 1     | 64979130 | 65009093 | SJC_S000639 | 54803 | 124378 | +  | Sjp_0058680.1 | NA                            | NA       |
| HSB10kb_822 | 1     | 64979130 | 65009093 | SJC_S000639 | 54803 | 124378 | +  | Sjp_0058690.1 | molecular transducer activity | 0.50162  |
| HSB10kb_822 | 1     | 64979130 | 65009093 | SJC_S000639 | 54803 | 124378 | +  | Sjp_0058700.1 | NA                            | NA       |
| unknown     | NA    | NA       | NA       | SJC_S000640 | NA    | NA     | NA | Sjp_0058710.1 | NA                            | NA       |
| unknown     | NA    | NA       | NA       | SJC_S000640 | NA    | NA     | NA | Sjp_0058720.1 | NA                            | NA       |
| unknown     | NA    | NA       | NA       | SJC_S000640 | NA    | NA     | NA | Sjp_0058730.1 | NA                            | NA       |
| HSB10kb_823 | WZ    | 20533935 | 20550236 | SJC_S000641 | 20955 | 32959  |    | Sjp_0058740.1 | NA                            | NA       |
| unknown     | NA    | NA       | NA       | SJC_S000641 | NA    | NA     | NA | Sjp_0058750.1 | NA                            | NA       |
| unknown     | NA    | NA       | NA       | SJC_S000642 | NA    | NA     | NA | Sjp_0058760.1 | NA                            | NA       |
| unknown     | NA    | NA       | NA       | SJC_S000642 | NA    | NA     | NA | Sjp_0058770.1 | catalytic activity            | 0.035844 |
| unknown     | NA    | NA       | NA       | SJC_S000642 | NA    | NA     | NA | Sjp_0058780.1 | cell part                     | 0.009037 |
| unknown     | NA    | NA       | NA       | SJC_S000643 | NA    | NA     | NA | Sjp_0058790.1 | cellular process              | 0.63852  |
| HSB10kb_824 | 1     | 42163966 | 42212872 | SJC_S000643 | 27480 | 83363  | -  | Sjp_0058800.1 | NA                            | NA       |
| unknown     | NA    | NA       | NA       | SJC_S000643 | NA    | NA     | NA | Sjp_0058810.1 | NA                            | NA       |
| unknown     | NA    | NA       | NA       | SJC_S000643 | NA    | NA     | NA | Sjp_0058820.1 | NA                            | NA       |
| HSB10kb_825 | 1     | 59028743 | 59066562 | SJC_S000644 | 5684  | 43476  | +  | Sjp_0058830.1 | binding                       | 0.052762 |
| HSB10kb_825 | 1     | 59028743 | 59066562 | SJC_S000644 | 5684  | 43476  | +  | Sjp_0058840.1 | NA                            | NA       |
| HSB10kb_826 | 3     | 3117182  | 3152874  | SJC_S000645 | 931   | 46945  | +  | Sjp_0058850.1 | cell part                     | 0.009037 |
| HSB10kb_826 | 3     | 3117182  | 3152874  | SJC_S000645 | 931   | 46945  | +  | Sjp_0058860.1 | cell part                     | 0.009037 |
| EBR10kb_408 | "3,3" | NA       | NA       | SJC_S000645 | 46946 | 66548  | NA | Sjp_0058860.1 | cell part                     | 0.009037 |
| HSB10kb_827 | 3     | 7572563  | 7586211  | SJC_S000645 | 66549 | 81128  |    | Sjp_0058870.1 | NA                            | NA       |
| HSB10kb_827 | 3     | 7572563  | 7586211  | SJC_S000645 | 66549 | 81128  |    | Sjp_0058880.1 | binding                       | 0.052762 |
| unknown     | NA    | NA       | NA       | SJC_S000647 | NA    | NA     | NA | Sjp_0058890.1 | NA                            | NA       |
| unknown     | NA    | NA       | NA       | SJC_S000647 | NA    | NA     | NA | Sjp_0058900.1 | biological regulation         | 0.76396  |
| unknown     | NA    | NA       | NA       | SJC_S000647 | NA    | NA     | NA | Sjp_0058910.1 | NA                            | NA       |

|             |    |          |          |             |       |        |    |               |                               |          |
|-------------|----|----------|----------|-------------|-------|--------|----|---------------|-------------------------------|----------|
| HSB10kb_828 | WZ | 38090506 | 38113280 | SJC_S000648 | 15581 | 43111  | +  | Sjp_0058920.1 | NA                            | NA       |
| HSB10kb_828 | WZ | 38090506 | 38113280 | SJC_S000648 | 15581 | 43111  | +  | Sjp_0058930.1 | NA                            | NA       |
| unknown     | NA | NA       | NA       | SJC_S000648 | NA    | NA     | NA | Sjp_0058940.1 | developmental process         | NA       |
| unknown     | NA | NA       | NA       | SJC_S000649 | NA    | NA     | NA | Sjp_0058950.1 | establishment of localization | NA       |
| unknown     | NA | NA       | NA       | SJC_S000649 | NA    | NA     | NA | Sjp_0058960.1 | NA                            | NA       |
| unknown     | NA | NA       | NA       | SJC_S000649 | NA    | NA     | NA | Sjp_0058970.1 | NA                            | NA       |
| unknown     | NA | NA       | NA       | SJC_S000649 | NA    | NA     | NA | Sjp_0058980.1 | NA                            | NA       |
| unknown     | NA | NA       | NA       | SJC_S000650 | NA    | NA     | NA | Sjp_0058990.1 | NA                            | NA       |
| unknown     | NA | NA       | NA       | SJC_S000651 | NA    | NA     | NA | Sjp_0059000.1 | NA                            | NA       |
| unknown     | NA | NA       | NA       | SJC_S000651 | NA    | NA     | NA | Sjp_0059010.1 | catalytic activity            | 0.035844 |
| unknown     | NA | NA       | NA       | SJC_S000651 | NA    | NA     | NA | Sjp_0059020.1 | NA                            | NA       |
| unknown     | NA | NA       | NA       | SJC_S000651 | NA    | NA     | NA | Sjp_0059030.1 | NA                            | NA       |
| unknown     | NA | NA       | NA       | SJC_S000653 | NA    | NA     | NA | Sjp_0059040.1 | NA                            | NA       |
| unknown     | NA | NA       | NA       | SJC_S000654 | NA    | NA     | NA | Sjp_0059050.1 | response to stimulus          | NA       |
| unknown     | NA | NA       | NA       | SJC_S000654 | NA    | NA     | NA | Sjp_0059060.1 | cell part                     | 0.009037 |
| unknown     | NA | NA       | NA       | SJC_S000654 | NA    | NA     | NA | Sjp_0059070.1 | cell part                     | 0.009037 |
| unknown     | NA | NA       | NA       | SJC_S000654 | NA    | NA     | NA | Sjp_0059090.1 | NA                            | NA       |
| unknown     | NA | NA       | NA       | SJC_S000654 | NA    | NA     | NA | Sjp_0059100.1 | NA                            | NA       |
| unknown     | NA | NA       | NA       | SJC_S000654 | NA    | NA     | NA | Sjp_0059110.1 | NA                            | NA       |
| unknown     | NA | NA       | NA       | SJC_S000654 | NA    | NA     | NA | Sjp_0059120.1 | NA                            | NA       |
| unknown     | NA | NA       | NA       | SJC_S000655 | NA    | NA     | NA | Sjp_0059130.1 | NA                            | NA       |
| unknown     | NA | NA       | NA       | SJC_S000655 | NA    | NA     | NA | Sjp_0059140.1 | NA                            | NA       |
| unknown     | NA | NA       | NA       | SJC_S000655 | NA    | NA     | NA | Sjp_0059150.1 | NA                            | NA       |
| unknown     | NA | NA       | NA       | SJC_S000655 | NA    | NA     | NA | Sjp_0059160.1 | NA                            | NA       |
| unknown     | NA | NA       | NA       | SJC_S000655 | NA    | NA     | NA | Sjp_0059170.1 | catalytic activity            | 0.035844 |
| unknown     | NA | NA       | NA       | SJC_S000655 | NA    | NA     | NA | Sjp_0059180.1 | NA                            | NA       |
| HSB10kb_829 | 1  | 19947324 | 20147419 | SJC_S000656 | 12402 | 224270 | +  | Sjp_0059190.1 | catalytic activity            | 0.035844 |
| HSB10kb_829 | 1  | 19947324 | 20147419 | SJC_S000656 | 12402 | 224270 | +  | Sjp_0059200.1 | NA                            | NA       |
| HSB10kb_829 | 1  | 19947324 | 20147419 | SJC_S000656 | 12402 | 224270 | +  | Sjp_0059210.1 | cell part                     | 0.009037 |
| HSB10kb_829 | 1  | 19947324 | 20147419 | SJC_S000656 | 12402 | 224270 | +  | Sjp_0059220.1 | NA                            | NA       |
| HSB10kb_829 | 1  | 19947324 | 20147419 | SJC_S000656 | 12402 | 224270 | +  | Sjp_0059230.1 | NA                            | NA       |

|             |       |          |          |             |       |        |    |               |                                  |          |
|-------------|-------|----------|----------|-------------|-------|--------|----|---------------|----------------------------------|----------|
| HSB10kb_829 | 1     | 19947324 | 20147419 | SJC_S000656 | 12402 | 224270 | +  | Sjp_0059240.1 | cell part                        | 0.009037 |
| HSB10kb_829 | 1     | 19947324 | 20147419 | SJC_S000656 | 12402 | 224270 | +  | Sjp_0059250.1 | cellular process                 | 0.63852  |
| HSB10kb_829 | 1     | 19947324 | 20147419 | SJC_S000656 | 12402 | 224270 | +  | Sjp_0059260.1 | NA                               | NA       |
| HSB10kb_829 | 1     | 19947324 | 20147419 | SJC_S000656 | 12402 | 224270 | +  | Sjp_0059270.1 | binding                          | 0.052762 |
| HSB10kb_829 | 1     | 19947324 | 20147419 | SJC_S000656 | 12402 | 224270 | +  | Sjp_0059280.1 | catalytic activity               | 0.035844 |
| unknown     | NA    | NA       | NA       | SJC_S000657 | NA    | NA     | NA | Sjp_0059290.1 | transcription regulator activity | NA       |
| unknown     | NA    | NA       | NA       | SJC_S000657 | NA    | NA     | NA | Sjp_0059300.1 | binding                          | 0.052762 |
| unknown     | NA    | NA       | NA       | SJC_S000657 | NA    | NA     | NA | Sjp_0059310.1 | catalytic activity               | 0.035844 |
| unknown     | NA    | NA       | NA       | SJC_S000657 | NA    | NA     | NA | Sjp_0059320.1 | NA                               | NA       |
| unknown     | NA    | NA       | NA       | SJC_S000657 | NA    | NA     | NA | Sjp_0059330.1 | NA                               | NA       |
| unknown     | NA    | NA       | NA       | SJC_S000657 | NA    | NA     | NA | Sjp_0059340.1 | NA                               | NA       |
| unknown     | NA    | NA       | NA       | SJC_S000657 | NA    | NA     | NA | Sjp_0059350.1 | cellular process                 | 0.63852  |
| HSB10kb_830 | WZ    | 5195073  | 5445056  | SJC_S000658 | 2481  | 196321 | +  | Sjp_0059360.1 | NA                               | NA       |
| HSB10kb_830 | WZ    | 5195073  | 5445056  | SJC_S000658 | 2481  | 196321 | +  | Sjp_0059370.1 | NA                               | NA       |
| HSB10kb_830 | WZ    | 5195073  | 5445056  | SJC_S000658 | 2481  | 196321 | +  | Sjp_0059380.1 | NA                               | NA       |
| HSB10kb_830 | WZ    | 5195073  | 5445056  | SJC_S000658 | 2481  | 196321 | +  | Sjp_0059390.1 | NA                               | NA       |
| HSB10kb_830 | WZ    | 5195073  | 5445056  | SJC_S000658 | 2481  | 196321 | +  | Sjp_0059400.1 | NA                               | NA       |
| HSB10kb_830 | WZ    | 5195073  | 5445056  | SJC_S000658 | 2481  | 196321 | +  | Sjp_0059410.1 | biological regulation            | 0.76396  |
| HSB10kb_830 | WZ    | 5195073  | 5445056  | SJC_S000658 | 2481  | 196321 | +  | Sjp_0059420.1 | transporter activity             | 0.782    |
| unknown     | NA    | NA       | NA       | SJC_S000658 | NA    | NA     | NA | Sjp_0059430.1 | NA                               | NA       |
| unknown     | NA    | NA       | NA       | SJC_S000658 | NA    | NA     | NA | Sjp_0059440.1 | NA                               | NA       |
| unknown     | NA    | NA       | NA       | SJC_S000658 | NA    | NA     | NA | Sjp_0059450.1 | catalytic activity               | 0.035844 |
| unknown     | NA    | NA       | NA       | SJC_S000658 | NA    | NA     | NA | Sjp_0059460.1 | NA                               | NA       |
| HSB10kb_831 | 1     | 2593773  | 2609303  | SJC_S000659 | 10535 | 22639  | -  | Sjp_0059470.1 | NA                               | NA       |
| EBR10kb_409 | "1,1" | NA       | NA       | SJC_S000659 | 22640 | 50200  | NA | Sjp_0059470.1 | NA                               | NA       |
| EBR10kb_409 | "1,1" | NA       | NA       | SJC_S000659 | 22640 | 50200  | NA | Sjp_0059480.1 | NA                               | NA       |
| EBR10kb_409 | "1,1" | NA       | NA       | SJC_S000659 | 22640 | 50200  | NA | Sjp_0059490.1 | NA                               | NA       |
| HSB10kb_832 | 1     | 2796955  | 2811297  | SJC_S000659 | 50201 | 75432  | -  | Sjp_0059490.1 | NA                               | NA       |
| HSB10kb_832 | 1     | 2796955  | 2811297  | SJC_S000659 | 50201 | 75432  | -  | Sjp_0059500.1 | cell part                        | 0.009037 |
| EBR10kb_410 | "1,4" | NA       | NA       | SJC_S000659 | 75433 | 95381  | NA | Sjp_0059510.1 | NA                               | NA       |



|             |       |          |          |             |        |        |    |               |                                  |          |
|-------------|-------|----------|----------|-------------|--------|--------|----|---------------|----------------------------------|----------|
| HSB10kb_833 | 4     | 26106672 | 26133757 | SJC_S000659 | 95382  | 122953 | +  | Sjp_0059510.1 | NA                               | NA       |
| EBR10kb_411 | "4,1" | NA       | NA       | SJC_S000659 | 122954 | 141650 | NA | Sjp_0059510.1 | NA                               | NA       |
| HSB10kb_834 | 1     | 2766034  | 2782380  | SJC_S000659 | 141651 | 162949 | -  | Sjp_0059510.1 | NA                               | NA       |
| HSB10kb_834 | 1     | 2766034  | 2782380  | SJC_S000659 | 141651 | 162949 | -  | Sjp_0059520.1 | catalytic activity               | 0.035844 |
| unknown     | NA    | NA       | NA       | SJC_S000660 | NA     | NA     | NA | Sjp_0059530.1 | transporter activity             | 0.782    |
| unknown     | NA    | NA       | NA       | SJC_S000660 | NA     | NA     | NA | Sjp_0059540.1 | transporter activity             | 0.782    |
| unknown     | NA    | NA       | NA       | SJC_S000660 | NA     | NA     | NA | Sjp_0059550.1 | NA                               | NA       |
| unknown     | NA    | NA       | NA       | SJC_S000661 | NA     | NA     | NA | Sjp_0059570.1 | transcription regulator activity | NA       |
| unknown     | NA    | NA       | NA       | SJC_S000661 | NA     | NA     | NA | Sjp_0059580.1 | cell part                        | 0.009037 |
| HSB10kb_835 | 3     | 10231948 | 10250005 | SJC_S000661 | 24326  | 45841  | -  | Sjp_0059590.1 | binding                          | 0.052762 |
| HSB10kb_835 | 3     | 10231948 | 10250005 | SJC_S000661 | 24326  | 45841  | -  | Sjp_0059600.1 | biological regulation            | 0.76396  |
| EBR10kb_412 | "3,3" | NA       | NA       | SJC_S000661 | 45842  | 70948  | NA | Sjp_0059600.1 | biological regulation            | 0.76396  |
| HSB10kb_836 | 3     | 10264588 | 10357263 | SJC_S000661 | 70949  | 169658 | +  | NA            | NA                               | NA       |
| HSB10kb_837 | 2     | 14571559 | 14773335 | SJC_S000662 | 6985   | 215077 | +  | Sjp_0059610.1 | cell part                        | 0.009037 |
| HSB10kb_837 | 2     | 14571559 | 14773335 | SJC_S000662 | 6985   | 215077 | +  | Sjp_0059620.1 | NA                               | NA       |
| HSB10kb_837 | 2     | 14571559 | 14773335 | SJC_S000662 | 6985   | 215077 | +  | Sjp_0059630.1 | binding                          | 0.052762 |
| HSB10kb_837 | 2     | 14571559 | 14773335 | SJC_S000662 | 6985   | 215077 | +  | Sjp_0059640.1 | catalytic activity               | 0.035844 |
| unknown     | NA    | NA       | NA       | SJC_S000663 | NA     | NA     | NA | Sjp_0059650.1 | NA                               | NA       |
| unknown     | NA    | NA       | NA       | SJC_S000663 | NA     | NA     | NA | Sjp_0059660.1 | NA                               | NA       |
| unknown     | NA    | NA       | NA       | SJC_S000663 | NA     | NA     | NA | Sjp_0059670.1 | NA                               | NA       |
| unknown     | NA    | NA       | NA       | SJC_S000663 | NA     | NA     | NA | Sjp_0059680.1 | binding                          | 0.052762 |
| unknown     | NA    | NA       | NA       | SJC_S000663 | NA     | NA     | NA | Sjp_0059690.1 | biological regulation            | 0.76396  |
| unknown     | NA    | NA       | NA       | SJC_S000663 | NA     | NA     | NA | Sjp_0059700.1 | NA                               | NA       |
| unknown     | NA    | NA       | NA       | SJC_S000663 | NA     | NA     | NA | Sjp_0059710.1 | NA                               | NA       |
| unknown     | NA    | NA       | NA       | SJC_S000663 | NA     | NA     | NA | Sjp_0059720.1 | catalytic activity               | 0.035844 |
| unknown     | NA    | NA       | NA       | SJC_S000664 | NA     | NA     | NA | Sjp_0059730.1 | transporter activity             | 0.782    |

|             |    |          |          |             |       |        |    |               |                       |          |
|-------------|----|----------|----------|-------------|-------|--------|----|---------------|-----------------------|----------|
| HSB10kb_838 | 4  | 30360539 | 30392319 | SJC_S000664 | 29490 | 46312  | -  | Sjp_0059740.1 | NA                    | NA       |
| unknown     | NA | NA       | NA       | SJC_S000665 | NA    | NA     | NA | Sjp_0059750.1 | NA                    | NA       |
| unknown     | NA | NA       | NA       | SJC_S000665 | NA    | NA     | NA | Sjp_0059760.1 | NA                    | NA       |
| unknown     | NA | NA       | NA       | SJC_S000666 | NA    | NA     | NA | Sjp_0059770.1 | catalytic activity    | 0.035844 |
| HSB10kb_839 | 4  | 31834996 | 31846061 | SJC_S000666 | 25981 | 73003  |    | Sjp_0059780.1 | biological regulation | 0.76396  |
| unknown     | NA | NA       | NA       | SJC_S000667 | NA    | NA     | NA | Sjp_0059790.1 | NA                    | NA       |
| unknown     | NA | NA       | NA       | SJC_S000668 | NA    | NA     | NA | Sjp_0059800.1 | NA                    | NA       |
| unknown     | NA | NA       | NA       | SJC_S000668 | NA    | NA     | NA | Sjp_0059810.1 | NA                    | NA       |
| unknown     | NA | NA       | NA       | SJC_S000668 | NA    | NA     | NA | Sjp_0059820.1 | NA                    | NA       |
| unknown     | NA | NA       | NA       | SJC_S000668 | NA    | NA     | NA | Sjp_0059830.1 | catalytic activity    | 0.035844 |
| unknown     | NA | NA       | NA       | SJC_S000668 | NA    | NA     | NA | Sjp_0059840.1 | NA                    | NA       |
| unknown     | NA | NA       | NA       | SJC_S000668 | NA    | NA     | NA | Sjp_0059850.1 | catalytic activity    | 0.035844 |
| unknown     | NA | NA       | NA       | SJC_S000668 | NA    | NA     | NA | Sjp_0059860.1 | NA                    | NA       |
| unknown     | NA | NA       | NA       | SJC_S000669 | NA    | NA     | NA | Sjp_0059870.1 | NA                    | NA       |
| unknown     | NA | NA       | NA       | SJC_S000669 | NA    | NA     | NA | Sjp_0059880.1 | NA                    | NA       |
| unknown     | NA | NA       | NA       | SJC_S000669 | NA    | NA     | NA | Sjp_0059890.1 | NA                    | NA       |
| unknown     | NA | NA       | NA       | SJC_S000670 | NA    | NA     | NA | Sjp_0059900.1 | NA                    | NA       |
| unknown     | NA | NA       | NA       | SJC_S000671 | NA    | NA     | NA | Sjp_0059910.1 | NA                    | NA       |
| unknown     | NA | NA       | NA       | SJC_S000671 | NA    | NA     | NA | Sjp_0059920.1 | NA                    | NA       |
| unknown     | NA | NA       | NA       | SJC_S000671 | NA    | NA     | NA | Sjp_0059930.1 | NA                    | NA       |
| unknown     | NA | NA       | NA       | SJC_S000671 | NA    | NA     | NA | Sjp_0059940.1 | NA                    | NA       |
| unknown     | NA | NA       | NA       | SJC_S000671 | NA    | NA     | NA | Sjp_0059950.1 | NA                    | NA       |
| unknown     | NA | NA       | NA       | SJC_S000671 | NA    | NA     | NA | Sjp_0059960.1 | biological regulation | 0.76396  |
| unknown     | NA | NA       | NA       | SJC_S000671 | NA    | NA     | NA | Sjp_0059970.1 | transporter activity  | 0.782    |
| unknown     | NA | NA       | NA       | SJC_S000671 | NA    | NA     | NA | Sjp_0059980.1 | NA                    | NA       |
| unknown     | NA | NA       | NA       | SJC_S000672 | NA    | NA     | NA | Sjp_0059990.1 | NA                    | NA       |
| unknown     | NA | NA       | NA       | SJC_S000672 | NA    | NA     | NA | Sjp_0060000.1 | catalytic activity    | 0.035844 |
| HSB10kb_840 | 3  | 2058271  | 2252800  | SJC_S000674 | 34613 | 180553 | +  | Sjp_0060010.1 | NA                    | NA       |
| HSB10kb_840 | 3  | 2058271  | 2252800  | SJC_S000674 | 34613 | 180553 | +  | Sjp_0060020.1 | catalytic activity    | 0.035844 |
| HSB10kb_840 | 3  | 2058271  | 2252800  | SJC_S000674 | 34613 | 180553 | +  | Sjp_0060030.1 | NA                    | NA       |
| HSB10kb_841 | 3  | 12291868 | 12334564 | SJC_S000675 | 17303 | 66201  | +  | Sjp_0060040.1 | binding               | 0.052762 |

|             |       |          |          |             |        |        |    |               |                               |          |
|-------------|-------|----------|----------|-------------|--------|--------|----|---------------|-------------------------------|----------|
| HSB10kb_841 | 3     | 12291868 | 12334564 | SJC_S000675 | 17303  | 66201  | +  | Sjp_0060050.1 | cell part                     | 0.009037 |
| unknown     | NA    | NA       | NA       | SJC_S000676 | NA     | NA     | NA | Sjp_0060060.1 | NA                            | NA       |
| unknown     | NA    | NA       | NA       | SJC_S000676 | NA     | NA     | NA | Sjp_0060070.1 | NA                            | NA       |
| unknown     | NA    | NA       | NA       | SJC_S000676 | NA     | NA     | NA | Sjp_0060080.1 | catalytic activity            | 0.035844 |
| unknown     | NA    | NA       | NA       | SJC_S000677 | NA     | NA     | NA | Sjp_0060090.1 | NA                            | NA       |
| unknown     | NA    | NA       | NA       | SJC_S000678 | NA     | NA     | NA | Sjp_0060100.1 | NA                            | NA       |
| unknown     | NA    | NA       | NA       | SJC_S000679 | NA     | NA     | NA | Sjp_0060110.1 | catalytic activity            | 0.035844 |
| unknown     | NA    | NA       | NA       | SJC_S000679 | NA     | NA     | NA | Sjp_0060120.1 | cellular process              | 0.63852  |
| unknown     | NA    | NA       | NA       | SJC_S000679 | NA     | NA     | NA | Sjp_0060130.1 | NA                            | NA       |
| HSB10kb_842 | WZ    | 27743405 | 27820534 | SJC_S000679 | 33782  | 49570  |    | NA            | NA                            | NA       |
| unknown     | NA    | NA       | NA       | SJC_S000680 | NA     | NA     | NA | Sjp_0060140.1 | NA                            | NA       |
| unknown     | NA    | NA       | NA       | SJC_S000680 | NA     | NA     | NA | Sjp_0060150.1 | NA                            | NA       |
| unknown     | NA    | NA       | NA       | SJC_S000680 | NA     | NA     | NA | Sjp_0060160.1 | NA                            | NA       |
| unknown     | NA    | NA       | NA       | SJC_S000680 | NA     | NA     | NA | Sjp_0060170.1 | NA                            | NA       |
| HSB10kb_843 | 4     | 16039285 | 16319454 | SJC_S000680 | 98171  | 313153 | -  | Sjp_0060190.1 | NA                            | NA       |
| HSB10kb_843 | 4     | 16039285 | 16319454 | SJC_S000680 | 98171  | 313153 | -  | Sjp_0060200.1 | NA                            | NA       |
| HSB10kb_843 | 4     | 16039285 | 16319454 | SJC_S000680 | 98171  | 313153 | -  | Sjp_0060210.1 | catalytic activity            | 0.035844 |
| HSB10kb_843 | 4     | 16039285 | 16319454 | SJC_S000680 | 98171  | 313153 | -  | Sjp_0060220.1 | NA                            | NA       |
| HSB10kb_843 | 4     | 16039285 | 16319454 | SJC_S000680 | 98171  | 313153 | -  | Sjp_0060230.1 | cell part                     | 0.009037 |
| HSB10kb_843 | 4     | 16039285 | 16319454 | SJC_S000680 | 98171  | 313153 | -  | Sjp_0060240.1 | catalytic activity            | 0.035844 |
| EBR10kb_413 | "4,4" | NA       | NA       | SJC_S000680 | 313154 | 346185 | NA | Sjp_0060260.1 | NA                            | NA       |
| EBR10kb_413 | "4,4" | NA       | NA       | SJC_S000680 | 313154 | 346185 | NA | Sjp_0060270.1 | molecular transducer activity | 0.50162  |
| HSB10kb_844 | 4     | 15993961 | 16029181 | SJC_S000680 | 346186 | 406763 | +  | NA            | NA                            | NA       |
| HSB10kb_845 | 2     | 18986084 | 19246868 | SJC_S000681 | 496    | 220461 | +  | Sjp_0060300.1 | NA                            | NA       |
| HSB10kb_845 | 2     | 18986084 | 19246868 | SJC_S000681 | 496    | 220461 | +  | Sjp_0060310.1 | catalytic activity            | 0.035844 |
| HSB10kb_845 | 2     | 18986084 | 19246868 | SJC_S000681 | 496    | 220461 | +  | Sjp_0060320.1 | cell part                     | 0.009037 |
| HSB10kb_845 | 2     | 18986084 | 19246868 | SJC_S000681 | 496    | 220461 | +  | Sjp_0060330.1 | catalytic activity            | 0.035844 |
| HSB10kb_845 | 2     | 18986084 | 19246868 | SJC_S000681 | 496    | 220461 | +  | Sjp_0060340.1 | NA                            | NA       |
| HSB10kb_845 | 2     | 18986084 | 19246868 | SJC_S000681 | 496    | 220461 | +  | Sjp_0060360.1 | catalytic activity            | 0.035844 |
| HSB10kb_845 | 2     | 18986084 | 19246868 | SJC_S000681 | 496    | 220461 | +  | Sjp_0060370.1 | NA                            | NA       |
| unknown     | NA    | NA       | NA       | SJC_S000682 | NA     | NA     | NA | Sjp_0060390.1 | NA                            | NA       |
| unknown     | NA    | NA       | NA       | SJC_S000682 | NA     | NA     | NA | Sjp_0060400.1 | NA                            | NA       |

|             |    |          |          |             |        |        |    |               |                               |          |
|-------------|----|----------|----------|-------------|--------|--------|----|---------------|-------------------------------|----------|
| unknown     | NA | NA       | NA       | SJC_S000682 | NA     | NA     | NA | Sjp_0060410.1 | catalytic activity            | 0.035844 |
| unknown     | NA | NA       | NA       | SJC_S000682 | NA     | NA     | NA | Sjp_0060420.1 | catalytic activity            | 0.035844 |
| unknown     | NA | NA       | NA       | SJC_S000682 | NA     | NA     | NA | Sjp_0060430.1 | NA                            | NA       |
| unknown     | NA | NA       | NA       | SJC_S000682 | NA     | NA     | NA | Sjp_0060440.1 | NA                            | NA       |
| unknown     | NA | NA       | NA       | SJC_S000682 | NA     | NA     | NA | Sjp_0060450.1 | NA                            | NA       |
| unknown     | NA | NA       | NA       | SJC_S000682 | NA     | NA     | NA | Sjp_0060460.1 | NA                            | NA       |
| unknown     | NA | NA       | NA       | SJC_S000683 | NA     | NA     | NA | Sjp_0060470.1 | establishment of localization | NA       |
| unknown     | NA | NA       | NA       | SJC_S000683 | NA     | NA     | NA | Sjp_0060480.1 | NA                            | NA       |
| HSB10kb_846 | 2  | 23578401 | 23618827 | SJC_S000683 | 186649 | 225232 | +  | Sjp_0060490.1 | binding                       | 0.052762 |
| unknown     | NA | NA       | NA       | SJC_S000684 | NA     | NA     | NA | Sjp_0060500.1 | NA                            | NA       |
| unknown     | NA | NA       | NA       | SJC_S000684 | NA     | NA     | NA | Sjp_0060510.1 | NA                            | NA       |
| HSB10kb_847 | 4  | 3420374  | 3520426  | SJC_S000684 | 54562  | 174255 | +  | Sjp_0060520.1 | NA                            | NA       |
| HSB10kb_847 | 4  | 3420374  | 3520426  | SJC_S000684 | 54562  | 174255 | +  | Sjp_0060530.1 | NA                            | NA       |
| HSB10kb_847 | 4  | 3420374  | 3520426  | SJC_S000684 | 54562  | 174255 | +  | Sjp_0060540.1 | NA                            | NA       |
| HSB10kb_847 | 4  | 3420374  | 3520426  | SJC_S000684 | 54562  | 174255 | +  | Sjp_0060550.1 | NA                            | NA       |
| unknown     | NA | NA       | NA       | SJC_S000685 | NA     | NA     | NA | Sjp_0060560.1 | NA                            | NA       |
| unknown     | NA | NA       | NA       | SJC_S000685 | NA     | NA     | NA | Sjp_0060570.1 | biological regulation         | 0.76396  |
| unknown     | NA | NA       | NA       | SJC_S000685 | NA     | NA     | NA | Sjp_0060580.1 | catalytic activity            | 0.035844 |
| unknown     | NA | NA       | NA       | SJC_S000685 | NA     | NA     | NA | Sjp_0060590.1 | catalytic activity            | 0.035844 |
| HSB10kb_848 | 6  | 13457306 | 13578557 | SJC_S000686 | 8391   | 129398 | +  | Sjp_0060600.1 | NA                            | NA       |
| HSB10kb_848 | 6  | 13457306 | 13578557 | SJC_S000686 | 8391   | 129398 | +  | Sjp_0060610.1 | NA                            | NA       |
| HSB10kb_848 | 6  | 13457306 | 13578557 | SJC_S000686 | 8391   | 129398 | +  | Sjp_0060620.1 | catalytic activity            | 0.035844 |
| HSB10kb_848 | 6  | 13457306 | 13578557 | SJC_S000686 | 8391   | 129398 | +  | Sjp_0060630.1 | binding                       | 0.052762 |
| HSB10kb_848 | 6  | 13457306 | 13578557 | SJC_S000686 | 8391   | 129398 | +  | Sjp_0060640.1 | NA                            | NA       |
| HSB10kb_848 | 6  | 13457306 | 13578557 | SJC_S000686 | 8391   | 129398 | +  | Sjp_0060650.1 | NA                            | NA       |
| HSB10kb_849 | 1  | 58711288 | 58901993 | SJC_S000687 | 78088  | 244722 | -  | Sjp_0060660.1 | NA                            | NA       |
| HSB10kb_849 | 1  | 58711288 | 58901993 | SJC_S000687 | 78088  | 244722 | -  | Sjp_0060670.1 | NA                            | NA       |
| HSB10kb_849 | 1  | 58711288 | 58901993 | SJC_S000687 | 78088  | 244722 | -  | Sjp_0060680.1 | NA                            | NA       |
| HSB10kb_849 | 1  | 58711288 | 58901993 | SJC_S000687 | 78088  | 244722 | -  | Sjp_0060690.1 | NA                            | NA       |
| HSB10kb_850 | 3  | 7251303  | 7422300  | SJC_S000688 | 18346  | 135742 | -  | Sjp_0060700.1 | NA                            | NA       |
| HSB10kb_850 | 3  | 7251303  | 7422300  | SJC_S000688 | 18346  | 135742 | -  | Sjp_0060710.1 | NA                            | NA       |
| HSB10kb_850 | 3  | 7251303  | 7422300  | SJC_S000688 | 18346  | 135742 | -  | Sjp_0060720.1 | binding                       | 0.052762 |

|             |       |          |          |             |        |        |    |               |                           |          |
|-------------|-------|----------|----------|-------------|--------|--------|----|---------------|---------------------------|----------|
| HSB10kb_851 | WZ    | 4322548  | 4452784  | SJC_S000689 | 1      | 144105 | -  | Sjp_0060730.1 | transporter activity      | 0.782    |
| HSB10kb_851 | WZ    | 4322548  | 4452784  | SJC_S000689 | 1      | 144105 | -  | Sjp_0060740.1 | NA                        | NA       |
| HSB10kb_851 | WZ    | 4322548  | 4452784  | SJC_S000689 | 1      | 144105 | -  | Sjp_0060750.1 | NA                        | NA       |
| unknown     | NA    | NA       | NA       | SJC_S000690 | NA     | NA     | NA | Sjp_0060760.1 | NA                        | NA       |
| HSB10kb_852 | 4     | 18729043 | 18761429 | SJC_S000690 | 35896  | 55191  | -  | Sjp_0060770.1 | NA                        | NA       |
| HSB10kb_852 | 4     | 18729043 | 18761429 | SJC_S000690 | 35896  | 55191  | -  | Sjp_0060780.1 | NA                        | NA       |
| unknown     | NA    | NA       | NA       | SJC_S000690 | NA     | NA     | NA | Sjp_0060790.1 | NA                        | NA       |
| unknown     | NA    | NA       | NA       | SJC_S000691 | NA     | NA     | NA | Sjp_0060800.1 | NA                        | NA       |
| HSB10kb_853 | 1     | 40095159 | 40247143 | SJC_S000691 | 11753  | 166668 | -  | Sjp_0060810.1 | NA                        | NA       |
| HSB10kb_853 | 1     | 40095159 | 40247143 | SJC_S000691 | 11753  | 166668 | -  | Sjp_0060820.1 | NA                        | NA       |
| HSB10kb_853 | 1     | 40095159 | 40247143 | SJC_S000691 | 11753  | 166668 | -  | Sjp_0060830.1 | catalytic activity        | 0.035844 |
| HSB10kb_853 | 1     | 40095159 | 40247143 | SJC_S000691 | 11753  | 166668 | -  | Sjp_0060840.1 | NA                        | NA       |
| HSB10kb_853 | 1     | 40095159 | 40247143 | SJC_S000691 | 11753  | 166668 | -  | Sjp_0060850.1 | NA                        | NA       |
| HSB10kb_853 | 1     | 40095159 | 40247143 | SJC_S000691 | 11753  | 166668 | -  | Sjp_0060860.1 | NA                        | NA       |
| HSB10kb_854 | 4     | 10714667 | 10751619 | SJC_S000692 | 15513  | 55910  | -  | Sjp_0060870.1 | catalytic activity        | 0.035844 |
| HSB10kb_854 | 4     | 10714667 | 10751619 | SJC_S000692 | 15513  | 55910  | -  | Sjp_0060880.1 | cell part                 | 0.009037 |
| HSB10kb_854 | 4     | 10714667 | 10751619 | SJC_S000692 | 15513  | 55910  | -  | Sjp_0060890.1 | catalytic activity        | 0.035844 |
| HSB10kb_854 | 4     | 10714667 | 10751619 | SJC_S000692 | 15513  | 55910  | -  | Sjp_0060900.1 | cell part                 | 0.009037 |
| HSB10kb_855 | WZ    | 47781671 | 47832560 | SJC_S000693 | 30269  | 48745  |    | Sjp_0060910.1 | NA                        | NA       |
| unknown     | NA    | NA       | NA       | SJC_S000693 | NA     | NA     | NA | Sjp_0060920.1 | NA                        | NA       |
| unknown     | NA    | NA       | NA       | SJC_S000693 | NA     | NA     | NA | Sjp_0060930.1 | NA                        | NA       |
| unknown     | NA    | NA       | NA       | SJC_S000693 | NA     | NA     | NA | Sjp_0060940.1 | NA                        | NA       |
| unknown     | NA    | NA       | NA       | SJC_S000693 | NA     | NA     | NA | Sjp_0060950.1 | enzyme regulator activity | 0.1755   |
| unknown     | NA    | NA       | NA       | SJC_S000694 | NA     | NA     | NA | Sjp_0060960.1 | NA                        | NA       |
| HSB10kb_856 | 1     | 23572732 | 23594859 | SJC_S000694 | 96573  | 109279 |    | Sjp_0060970.1 | biological regulation     | 0.76396  |
| EBR10kb_414 | "1,1" | NA       | NA       | SJC_S000694 | 109280 | 131130 | NA | Sjp_0060980.1 | NA                        | NA       |
| EBR10kb_414 | "1,1" | NA       | NA       | SJC_S000694 | 109280 | 131130 | NA | Sjp_0060990.1 | NA                        | NA       |
| HSB10kb_857 | 1     | 23796998 | 23830527 | SJC_S000694 | 131131 | 177356 | +  | Sjp_0060990.1 | NA                        | NA       |
| HSB10kb_857 | 1     | 23796998 | 23830527 | SJC_S000694 | 131131 | 177356 | +  | Sjp_0061000.1 | cell part                 | 0.009037 |
| HSB10kb_857 | 1     | 23796998 | 23830527 | SJC_S000694 | 131131 | 177356 | +  | Sjp_0061010.1 | NA                        | NA       |

|             |    |          |          |             |        |        |    |               |                           |          |
|-------------|----|----------|----------|-------------|--------|--------|----|---------------|---------------------------|----------|
| HSB10kb_857 | 1  | 23796998 | 23830527 | SJC_S000694 | 131131 | 177356 | +  | Sjp_0061020.1 | NA                        | NA       |
| HSB10kb_857 | 1  | 23796998 | 23830527 | SJC_S000694 | 131131 | 177356 | +  | Sjp_0061030.1 | NA                        | NA       |
| unknown     | NA | NA       | NA       | SJC_S000695 | NA     | NA     | NA | Sjp_0061040.1 | biological regulation     | 0.76396  |
| unknown     | NA | NA       | NA       | SJC_S000695 | NA     | NA     | NA | Sjp_0061050.1 | biological regulation     | 0.76396  |
| unknown     | NA | NA       | NA       | SJC_S000696 | NA     | NA     | NA | Sjp_0061060.1 | NA                        | NA       |
| unknown     | NA | NA       | NA       | SJC_S000696 | NA     | NA     | NA | Sjp_0061070.1 | enzyme regulator activity | 0.1755   |
| unknown     | NA | NA       | NA       | SJC_S000696 | NA     | NA     | NA | Sjp_0061080.1 | cell part                 | 0.009037 |
| unknown     | NA | NA       | NA       | SJC_S000696 | NA     | NA     | NA | Sjp_0061100.1 | cellular process          | 0.63852  |
| unknown     | NA | NA       | NA       | SJC_S000697 | NA     | NA     | NA | Sjp_0061110.1 | transporter activity      | 0.782    |
| unknown     | NA | NA       | NA       | SJC_S000697 | NA     | NA     | NA | Sjp_0061120.1 | transporter activity      | 0.782    |
| unknown     | NA | NA       | NA       | SJC_S000698 | NA     | NA     | NA | Sjp_0061130.1 | NA                        | NA       |
| unknown     | NA | NA       | NA       | SJC_S000698 | NA     | NA     | NA | Sjp_0061140.1 | NA                        | NA       |
| HSB10kb_858 | WZ | 18809031 | 18845292 | SJC_S000698 | 53583  | 78819  | +  | NA            | NA                        | NA       |
| unknown     | NA | NA       | NA       | SJC_S000698 | NA     | NA     | NA | Sjp_0061150.1 | NA                        | NA       |
| unknown     | NA | NA       | NA       | SJC_S000698 | NA     | NA     | NA | Sjp_0061160.1 | NA                        | NA       |
| unknown     | NA | NA       | NA       | SJC_S000698 | NA     | NA     | NA | Sjp_0061170.1 | NA                        | NA       |
| HSB10kb_859 | 1  | 15470805 | 15495158 | SJC_S000699 | 59644  | 76154  | +  | Sjp_0061190.1 | biological regulation     | 0.76396  |
| HSB10kb_859 | 1  | 15470805 | 15495158 | SJC_S000699 | 59644  | 76154  | +  | Sjp_0061200.1 | cellular process          | 0.63852  |
| unknown     | NA | NA       | NA       | SJC_S000700 | NA     | NA     | NA | Sjp_0061210.1 | NA                        | NA       |
| unknown     | NA | NA       | NA       | SJC_S000700 | NA     | NA     | NA | Sjp_0061220.1 | NA                        | NA       |
| unknown     | NA | NA       | NA       | SJC_S000701 | NA     | NA     | NA | Sjp_0061230.1 | NA                        | NA       |
| unknown     | NA | NA       | NA       | SJC_S000703 | NA     | NA     | NA | Sjp_0061240.1 | NA                        | NA       |
| unknown     | NA | NA       | NA       | SJC_S000703 | NA     | NA     | NA | Sjp_0061250.1 | NA                        | NA       |
| unknown     | NA | NA       | NA       | SJC_S000703 | NA     | NA     | NA | Sjp_0061260.1 | NA                        | NA       |
| unknown     | NA | NA       | NA       | SJC_S000704 | NA     | NA     | NA | Sjp_0061270.1 | enzyme regulator activity | 0.1755   |

|             |       |          |          |             |        |        |    |               |                       |          |
|-------------|-------|----------|----------|-------------|--------|--------|----|---------------|-----------------------|----------|
| unknown     | NA    | NA       | NA       | SJC_S000705 | NA     | NA     | NA | Sjp_0061280.1 | NA                    | NA       |
| unknown     | NA    | NA       | NA       | SJC_S000706 | NA     | NA     | NA | Sjp_0061290.1 | NA                    | NA       |
| unknown     | NA    | NA       | NA       | SJC_S000706 | NA     | NA     | NA | Sjp_0061310.1 | catalytic activity    | 0.035844 |
| unknown     | NA    | NA       | NA       | SJC_S000706 | NA     | NA     | NA | Sjp_0061320.1 | NA                    | NA       |
| unknown     | NA    | NA       | NA       | SJC_S000706 | NA     | NA     | NA | Sjp_0061330.1 | catalytic activity    | 0.035844 |
| unknown     | NA    | NA       | NA       | SJC_S000707 | NA     | NA     | NA | Sjp_0061340.1 | cell part             | 0.009037 |
| unknown     | NA    | NA       | NA       | SJC_S000707 | NA     | NA     | NA | Sjp_0061350.1 | NA                    | NA       |
| HSB10kb_860 | 1     | 22778275 | 22855671 | SJC_S000707 | 224604 | 299441 | +  | Sjp_0061360.1 | catalytic activity    | 0.035844 |
| HSB10kb_860 | 1     | 22778275 | 22855671 | SJC_S000707 | 224604 | 299441 | +  | Sjp_0061370.1 | NA                    | NA       |
| EBR10kb_415 | "1,1" | NA       | NA       | SJC_S000707 | 299442 | 337212 | NA | Sjp_0061380.1 | NA                    | NA       |
| EBR10kb_415 | "1,1" | NA       | NA       | SJC_S000707 | 299442 | 337212 | NA | Sjp_0061390.1 | NA                    | NA       |
| EBR10kb_415 | "1,1" | NA       | NA       | SJC_S000707 | 299442 | 337212 | NA | Sjp_0061400.1 | NA                    | NA       |
| EBR10kb_415 | "1,1" | NA       | NA       | SJC_S000707 | 299442 | 337212 | NA | Sjp_0061410.1 | NA                    | NA       |
| HSB10kb_861 | 1     | 20900554 | 20936693 | SJC_S000707 | 337213 | 373040 | +  | Sjp_0061410.1 | NA                    | NA       |
| HSB10kb_861 | 1     | 20900554 | 20936693 | SJC_S000707 | 337213 | 373040 | +  | Sjp_0061420.1 | biological regulation | 0.76396  |
| unknown     | NA    | NA       | NA       | SJC_S000708 | NA     | NA     | NA | Sjp_0061430.1 | NA                    | NA       |
| unknown     | NA    | NA       | NA       | SJC_S000708 | NA     | NA     | NA | Sjp_0061440.1 | NA                    | NA       |
| unknown     | NA    | NA       | NA       | SJC_S000708 | NA     | NA     | NA | Sjp_0061450.1 | catalytic activity    | 0.035844 |
| HSB10kb_862 | 7     | 2964149  | 2985452  | SJC_S000708 | 106462 | 126831 | +  | Sjp_0061460.1 | biological regulation | 0.76396  |
| HSB10kb_862 | 7     | 2964149  | 2985452  | SJC_S000708 | 106462 | 126831 | +  | Sjp_0061470.1 | cellular process      | 0.63852  |
| EBR10kb_416 | "7,4" | NA       | NA       | SJC_S000708 | 126832 | 172479 | NA | Sjp_0061470.1 | cellular process      | 0.63852  |
| EBR10kb_416 | "7,4" | NA       | NA       | SJC_S000708 | 126832 | 172479 | NA | Sjp_0061480.1 | NA                    | NA       |
| HSB10kb_863 | 4     | 18965019 | 18986518 | SJC_S000708 | 172480 | 193042 | +  | Sjp_0061490.1 | NA                    | NA       |
| HSB10kb_863 | 4     | 18965019 | 18986518 | SJC_S000708 | 172480 | 193042 | +  | Sjp_0061500.1 | NA                    | NA       |
| EBR10kb_417 | "4,7" | NA       | NA       | SJC_S000708 | 193043 | 223809 | NA | Sjp_0061510.1 | NA                    | NA       |
| EBR10kb_417 | "4,7" | NA       | NA       | SJC_S000708 | 193043 | 223809 | NA | Sjp_0061520.1 | NA                    | NA       |
| HSB10kb_864 | 7     | 2858520  | 2880160  | SJC_S000708 | 223810 | 244294 | +  | Sjp_0061530.1 | cellular process      | 0.63852  |
| unknown     | NA    | NA       | NA       | SJC_S000709 | NA     | NA     | NA | Sjp_0061540.1 | NA                    | NA       |
| HSB10kb_865 | 4     | 24716432 | 24726741 | SJC_S000709 | 52773  | 70948  |    | NA            | NA                    | NA       |
| unknown     | NA    | NA       | NA       | SJC_S000710 | NA     | NA     | NA | Sjp_0061560.1 | NA                    | NA       |
| unknown     | NA    | NA       | NA       | SJC_S000710 | NA     | NA     | NA | Sjp_0061570.1 | NA                    | NA       |
| HSB10kb_866 | 4     | 13195673 | 13302258 | SJC_S000710 | 118859 | 170320 | -  | Sjp_0061580.1 | NA                    | NA       |

|             |       |          |          |             |        |        |    |               |                       |          |
|-------------|-------|----------|----------|-------------|--------|--------|----|---------------|-----------------------|----------|
| HSB10kb_866 | 4     | 13195673 | 13302258 | SJC_S000710 | 118859 | 170320 | -  | Sjp_0061590.1 | NA                    | NA       |
| unknown     | NA    | NA       | NA       | SJC_S000711 | NA     | NA     | NA | Sjp_0061600.1 | catalytic activity    | 0.035844 |
| HSB10kb_867 | 4     | 24277763 | 24413247 | SJC_S000711 | 43161  | 144749 | -  | Sjp_0061610.1 | NA                    | NA       |
| HSB10kb_867 | 4     | 24277763 | 24413247 | SJC_S000711 | 43161  | 144749 | -  | Sjp_0061620.1 | NA                    | NA       |
| HSB10kb_867 | 4     | 24277763 | 24413247 | SJC_S000711 | 43161  | 144749 | -  | Sjp_0061630.1 | catalytic activity    | 0.035844 |
| HSB10kb_867 | 4     | 24277763 | 24413247 | SJC_S000711 | 43161  | 144749 | -  | Sjp_0061640.1 | NA                    | NA       |
| HSB10kb_868 | 6     | 455145   | 529689   | SJC_S000712 | 1878   | 55487  | +  | Sjp_0061650.1 | catalytic activity    | 0.035844 |
| HSB10kb_868 | 6     | 455145   | 529689   | SJC_S000712 | 1878   | 55487  | +  | Sjp_0061660.1 | NA                    | NA       |
| HSB10kb_868 | 6     | 455145   | 529689   | SJC_S000712 | 1878   | 55487  | +  | Sjp_0061670.1 | cellular process      | 0.63852  |
| EBR10kb_418 | "6,6" | NA       | NA       | SJC_S000712 | 55488  | 77433  | NA | Sjp_0061680.1 | binding               | 0.052762 |
| HSB10kb_869 | 6     | 540500   | 556043   | SJC_S000712 | 77434  | 90294  | -  | Sjp_0061680.1 | binding               | 0.052762 |
| EBR10kb_419 | "6,6" | NA       | NA       | SJC_S000712 | 90295  | 106756 | NA | Sjp_0061690.1 | cell part             | 0.009037 |
| EBR10kb_419 | "6,6" | NA       | NA       | SJC_S000712 | 90295  | 106756 | NA | Sjp_0061700.1 | cell part             | 0.009037 |
| HSB10kb_870 | 6     | 577416   | 588809   | SJC_S000712 | 106757 | 117918 | -  | Sjp_0061700.1 | cell part             | 0.009037 |
| HSB10kb_870 | 6     | 577416   | 588809   | SJC_S000712 | 106757 | 117918 | -  | Sjp_0061710.1 | NA                    | NA       |
| unknown     | NA    | NA       | NA       | SJC_S000713 | NA     | NA     | NA | Sjp_0061720.1 | NA                    | NA       |
| unknown     | NA    | NA       | NA       | SJC_S000713 | NA     | NA     | NA | Sjp_0061730.1 | NA                    | NA       |
| unknown     | NA    | NA       | NA       | SJC_S000713 | NA     | NA     | NA | Sjp_0061740.1 | NA                    | NA       |
| HSB10kb_871 | WZ    | 40597216 | 40646964 | SJC_S000713 | 75316  | 149852 | -  | Sjp_0061750.1 | NA                    | NA       |
| HSB10kb_871 | WZ    | 40597216 | 40646964 | SJC_S000713 | 75316  | 149852 | -  | Sjp_0061760.1 | catalytic activity    | 0.035844 |
| unknown     | NA    | NA       | NA       | SJC_S000714 | NA     | NA     | NA | Sjp_0061770.1 | biological regulation | 0.76396  |
| HSB10kb_872 | 1     | 42715453 | 42727137 | SJC_S000714 | 38553  | 49024  | +  | Sjp_0061790.1 | NA                    | NA       |
| HSB10kb_872 | 1     | 42715453 | 42727137 | SJC_S000714 | 38553  | 49024  | +  | Sjp_0061800.1 | NA                    | NA       |
| unknown     | NA    | NA       | NA       | SJC_S000715 | NA     | NA     | NA | Sjp_0061810.1 | NA                    | NA       |
| unknown     | NA    | NA       | NA       | SJC_S000715 | NA     | NA     | NA | Sjp_0061820.1 | NA                    | NA       |
| unknown     | NA    | NA       | NA       | SJC_S000715 | NA     | NA     | NA | Sjp_0061830.1 | NA                    | NA       |
| unknown     | NA    | NA       | NA       | SJC_S000715 | NA     | NA     | NA | Sjp_0061840.1 | NA                    | NA       |
| unknown     | NA    | NA       | NA       | SJC_S000716 | NA     | NA     | NA | Sjp_0061850.1 | NA                    | NA       |
| unknown     | NA    | NA       | NA       | SJC_S000717 | NA     | NA     | NA | Sjp_0061860.1 | NA                    | NA       |
| HSB10kb_873 | 4     | 4462257  | 4535418  | SJC_S000717 | 29346  | 107599 | -  | Sjp_0061870.1 | NA                    | NA       |
| HSB10kb_873 | 4     | 4462257  | 4535418  | SJC_S000717 | 29346  | 107599 | -  | Sjp_0061880.1 | NA                    | NA       |
| HSB10kb_873 | 4     | 4462257  | 4535418  | SJC_S000717 | 29346  | 107599 | -  | Sjp_0061890.1 | binding               | 0.052762 |
| unknown     | NA    | NA       | NA       | SJC_S000718 | NA     | NA     | NA | Sjp_0061900.1 | NA                    | NA       |



|             |       |          |          |             |        |        |    |               |                                               |          |
|-------------|-------|----------|----------|-------------|--------|--------|----|---------------|-----------------------------------------------|----------|
| unknown     | NA    | NA       | NA       | SJC_S000718 | NA     | NA     | NA | Sjp_0061910.1 | NA                                            | NA       |
| HSB10kb_874 | WZ    | 38839246 | 39062216 | SJC_S000718 | 175021 | 373463 | +  | Sjp_0061920.1 | cell part                                     | 0.009037 |
| HSB10kb_874 | WZ    | 38839246 | 39062216 | SJC_S000718 | 175021 | 373463 | +  | Sjp_0061930.1 | cellular component organization or biogenesis | NA       |
| HSB10kb_874 | WZ    | 38839246 | 39062216 | SJC_S000718 | 175021 | 373463 | +  | Sjp_0061940.1 | NA                                            | NA       |
| HSB10kb_874 | WZ    | 38839246 | 39062216 | SJC_S000718 | 175021 | 373463 | +  | Sjp_0061950.1 | NA                                            | NA       |
| HSB10kb_874 | WZ    | 38839246 | 39062216 | SJC_S000718 | 175021 | 373463 | +  | Sjp_0061960.1 | NA                                            | NA       |
| HSB10kb_874 | WZ    | 38839246 | 39062216 | SJC_S000718 | 175021 | 373463 | +  | Sjp_0061980.1 | NA                                            | NA       |
| HSB10kb_874 | WZ    | 38839246 | 39062216 | SJC_S000718 | 175021 | 373463 | +  | Sjp_0061990.1 | catalytic activity                            | 0.035844 |
| HSB10kb_874 | WZ    | 38839246 | 39062216 | SJC_S000718 | 175021 | 373463 | +  | Sjp_0062000.1 | NA                                            | NA       |
| HSB10kb_874 | WZ    | 38839246 | 39062216 | SJC_S000718 | 175021 | 373463 | +  | Sjp_0062010.1 | NA                                            | NA       |
| unknown     | NA    | NA       | NA       | SJC_S000719 | NA     | NA     | NA | Sjp_0062020.1 | NA                                            | NA       |
| HSB10kb_875 | 6     | 3183172  | 3271638  | SJC_S000719 | 24360  | 219646 | -  | Sjp_0062030.1 | NA                                            | NA       |
| HSB10kb_875 | 6     | 3183172  | 3271638  | SJC_S000719 | 24360  | 219646 | -  | Sjp_0062040.1 | binding                                       | 0.052762 |
| HSB10kb_875 | 6     | 3183172  | 3271638  | SJC_S000719 | 24360  | 219646 | -  | Sjp_0062050.1 | NA                                            | NA       |
| HSB10kb_875 | 6     | 3183172  | 3271638  | SJC_S000719 | 24360  | 219646 | -  | Sjp_0062060.1 | NA                                            | NA       |
| HSB10kb_875 | 6     | 3183172  | 3271638  | SJC_S000719 | 24360  | 219646 | -  | Sjp_0062070.1 | NA                                            | NA       |
| unknown     | NA    | NA       | NA       | SJC_S000720 | NA     | NA     | NA | Sjp_0062090.1 | NA                                            | NA       |
| unknown     | NA    | NA       | NA       | SJC_S000720 | NA     | NA     | NA | Sjp_0062100.1 | NA                                            | NA       |
| unknown     | NA    | NA       | NA       | SJC_S000720 | NA     | NA     | NA | Sjp_0062110.1 | NA                                            | NA       |
| HSB10kb_876 | WZ    | 18038419 | 18104555 | SJC_S000721 | 5267   | 112176 | -  | Sjp_0062120.1 | cellular process                              | 0.63852  |
| HSB10kb_876 | WZ    | 18038419 | 18104555 | SJC_S000721 | 5267   | 112176 | -  | Sjp_0062130.1 | catalytic activity                            | 0.035844 |
| HSB10kb_876 | WZ    | 18038419 | 18104555 | SJC_S000721 | 5267   | 112176 | -  | Sjp_0062150.1 | NA                                            | NA       |
| HSB10kb_876 | WZ    | 18038419 | 18104555 | SJC_S000721 | 5267   | 112176 | -  | Sjp_0062160.1 | NA                                            | NA       |
| HSB10kb_877 | 4     | 3532109  | 3571632  | SJC_S000722 | 9504   | 52474  | +  | Sjp_0062170.1 | catalytic activity                            | 0.035844 |
| EBR10kb_420 | "4,4" | NA       | NA       | SJC_S000722 | 52475  | 66219  | NA | Sjp_0062170.1 | catalytic activity                            | 0.035844 |
| HSB10kb_878 | 4     | 3617822  | 3713980  | SJC_S000722 | 66220  | 152313 | -  | Sjp_0062180.1 | NA                                            | NA       |
| EBR10kb_421 | "4,4" | NA       | NA       | SJC_S000722 | 152314 | 173800 | NA | Sjp_0062180.1 | NA                                            | NA       |
| EBR10kb_421 | "4,4" | NA       | NA       | SJC_S000722 | 152314 | 173800 | NA | Sjp_0062190.1 | transporter activity                          | 0.782    |
| HSB10kb_879 | 4     | 3723702  | 3753612  | SJC_S000722 | 173801 | 202130 | -  | Sjp_0062190.1 | transporter activity                          | 0.782    |

|             |         |         |         |             |        |        |    |               |                           |          |
|-------------|---------|---------|---------|-------------|--------|--------|----|---------------|---------------------------|----------|
| EBR10kb_422 | "4,4"   | NA      | NA      | SJC_S000722 | 202131 | 225314 | NA | Sjp_0062190.1 | transporter activity      | 0.782    |
| EBR10kb_422 | "4,4"   | NA      | NA      | SJC_S000722 | 202131 | 225314 | NA | Sjp_0062200.1 | metabolic process         | 0.41934  |
| HSB10kb_880 | 4       | 3780430 | 3838656 | SJC_S000722 | 225315 | 267718 | +  | Sjp_0062200.1 | metabolic process         | 0.41934  |
| HSB10kb_880 | 4       | 3780430 | 3838656 | SJC_S000722 | 225315 | 267718 | +  | Sjp_0062210.1 | NA                        | NA       |
| unknown     | NA      | NA      | NA      | SJC_S000722 | NA     | NA     | NA | Sjp_0062220.1 | NA                        | NA       |
| unknown     | NA      | NA      | NA      | SJC_S000722 | NA     | NA     | NA | Sjp_0062230.1 | NA                        | NA       |
| unknown     | NA      | NA      | NA      | SJC_S000723 | NA     | NA     | NA | Sjp_0062240.1 | NA                        | NA       |
| unknown     | NA      | NA      | NA      | SJC_S000723 | NA     | NA     | NA | Sjp_0062250.1 | NA                        | NA       |
| HSB10kb_881 | WZ      | 3870795 | 3994967 | SJC_S000723 | 103401 | 199553 | +  | Sjp_0062260.1 | response to stimulus      | NA       |
| HSB10kb_881 | WZ      | 3870795 | 3994967 | SJC_S000723 | 103401 | 199553 | +  | Sjp_0062270.1 | NA                        | NA       |
| HSB10kb_881 | WZ      | 3870795 | 3994967 | SJC_S000723 | 103401 | 199553 | +  | Sjp_0062280.1 | NA                        | NA       |
| HSB10kb_881 | WZ      | 3870795 | 3994967 | SJC_S000723 | 103401 | 199553 | +  | Sjp_0062290.1 | NA                        | NA       |
| EBR10kb_423 | "WZ,WZ" | NA      | NA      | SJC_S000723 | 199554 | 248759 | NA | Sjp_0062310.1 | transporter activity      | 0.782    |
| EBR10kb_423 | "WZ,WZ" | NA      | NA      | SJC_S000723 | 199554 | 248759 | NA | Sjp_0062320.1 | cell part                 | 0.009037 |
| HSB10kb_882 | WZ      | 4155384 | 4167771 | SJC_S000723 | 248760 | 269957 | +  | Sjp_0062320.1 | cell part                 | 0.009037 |
| EBR10kb_424 | "WZ,WZ" | NA      | NA      | SJC_S000723 | 269958 | 296663 | NA | Sjp_0062330.1 | NA                        | NA       |
| EBR10kb_424 | "WZ,WZ" | NA      | NA      | SJC_S000723 | 269958 | 296663 | NA | Sjp_0062340.1 | NA                        | NA       |
| HSB10kb_883 | WZ      | 4119758 | 4137281 | SJC_S000723 | 296664 | 307603 |    | Sjp_0062340.1 | NA                        | NA       |
| HSB10kb_883 | WZ      | 4119758 | 4137281 | SJC_S000723 | 296664 | 307603 |    | Sjp_0062350.1 | NA                        | NA       |
| EBR10kb_425 | "WZ,WZ" | NA      | NA      | SJC_S000723 | 307604 | 321376 | NA | Sjp_0062350.1 | NA                        | NA       |
| HSB10kb_884 | WZ      | 4174829 | 4195219 | SJC_S000723 | 321377 | 332335 | +  | Sjp_0062360.1 | NA                        | NA       |
| unknown     | NA      | NA      | NA      | SJC_S000723 | NA     | NA     | NA | Sjp_0062370.1 | NA                        | NA       |
| unknown     | NA      | NA      | NA      | SJC_S000724 | NA     | NA     | NA | Sjp_0062380.1 | biological regulation     | 0.76396  |
| unknown     | NA      | NA      | NA      | SJC_S000724 | NA     | NA     | NA | Sjp_0062390.1 | NA                        | NA       |
| unknown     | NA      | NA      | NA      | SJC_S000724 | NA     | NA     | NA | Sjp_0062400.1 | cell part                 | 0.009037 |
| unknown     | NA      | NA      | NA      | SJC_S000724 | NA     | NA     | NA | Sjp_0062410.1 | extracellular region part | NA       |
| unknown     | NA      | NA      | NA      | SJC_S000724 | NA     | NA     | NA | Sjp_0062420.1 | NA                        | NA       |

|             |       |          |          |             |        |        |    |               |                               |          |
|-------------|-------|----------|----------|-------------|--------|--------|----|---------------|-------------------------------|----------|
| unknown     | NA    | NA       | NA       | SJC_S000724 | NA     | NA     | NA | Sjp_0062430.1 | NA                            | NA       |
| unknown     | NA    | NA       | NA       | SJC_S000725 | NA     | NA     | NA | Sjp_0062440.1 | NA                            | NA       |
| HSB10kb_885 | 5     | 5007129  | 5108663  | SJC_S000726 | 11460  | 33541  | +  | Sjp_0062460.1 | establishment of localization | NA       |
| HSB10kb_885 | 5     | 5007129  | 5108663  | SJC_S000726 | 11460  | 33541  | +  | Sjp_0062470.1 | NA                            | NA       |
| EBR10kb_426 | "5,5" | NA       | NA       | SJC_S000726 | 33542  | 50778  | NA | Sjp_0062470.1 | NA                            | NA       |
| EBR10kb_426 | "5,5" | NA       | NA       | SJC_S000726 | 33542  | 50778  | NA | Sjp_0062480.1 | NA                            | NA       |
| HSB10kb_886 | 5     | 4922009  | 4997819  | SJC_S000726 | 50779  | 144394 | -  | Sjp_0062480.1 | NA                            | NA       |
| unknown     | NA    | NA       | NA       | SJC_S000727 | NA     | NA     | NA | Sjp_0062490.1 | binding                       | 0.052762 |
| unknown     | NA    | NA       | NA       | SJC_S000727 | NA     | NA     | NA | Sjp_0062500.1 | NA                            | NA       |
| unknown     | NA    | NA       | NA       | SJC_S000727 | NA     | NA     | NA | Sjp_0062510.1 | NA                            | NA       |
| unknown     | NA    | NA       | NA       | SJC_S000727 | NA     | NA     | NA | Sjp_0062520.1 | binding                       | 0.052762 |
| HSB10kb_887 | 4     | 12072180 | 12197887 | SJC_S000727 | 261951 | 394056 | -  | Sjp_0062530.1 | catalytic activity            | 0.035844 |
| HSB10kb_887 | 4     | 12072180 | 12197887 | SJC_S000727 | 261951 | 394056 | -  | Sjp_0062540.1 | NA                            | NA       |
| HSB10kb_887 | 4     | 12072180 | 12197887 | SJC_S000727 | 261951 | 394056 | -  | Sjp_0062550.1 | catalytic activity            | 0.035844 |
| HSB10kb_887 | 4     | 12072180 | 12197887 | SJC_S000727 | 261951 | 394056 | -  | Sjp_0062560.1 | NA                            | NA       |
| unknown     | NA    | NA       | NA       | SJC_S000728 | NA     | NA     | NA | Sjp_0062570.1 | NA                            | NA       |
| unknown     | NA    | NA       | NA       | SJC_S000728 | NA     | NA     | NA | Sjp_0062580.1 | NA                            | NA       |
| unknown     | NA    | NA       | NA       | SJC_S000728 | NA     | NA     | NA | Sjp_0062590.1 | NA                            | NA       |
| unknown     | NA    | NA       | NA       | SJC_S000728 | NA     | NA     | NA | Sjp_0062600.1 | NA                            | NA       |
| unknown     | NA    | NA       | NA       | SJC_S000728 | NA     | NA     | NA | Sjp_0062610.1 | NA                            | NA       |
| unknown     | NA    | NA       | NA       | SJC_S000728 | NA     | NA     | NA | Sjp_0062620.1 | metabolic process             | 0.41934  |
| unknown     | NA    | NA       | NA       | SJC_S000728 | NA     | NA     | NA | Sjp_0062630.1 | NA                            | NA       |
| unknown     | NA    | NA       | NA       | SJC_S000728 | NA     | NA     | NA | Sjp_0062640.1 | NA                            | NA       |
| unknown     | NA    | NA       | NA       | SJC_S000729 | NA     | NA     | NA | Sjp_0062650.1 | catalytic activity            | 0.035844 |
| unknown     | NA    | NA       | NA       | SJC_S000729 | NA     | NA     | NA | Sjp_0062660.1 | NA                            | NA       |
| unknown     | NA    | NA       | NA       | SJC_S000729 | NA     | NA     | NA | Sjp_0062670.1 | NA                            | NA       |
| unknown     | NA    | NA       | NA       | SJC_S000729 | NA     | NA     | NA | Sjp_0062680.1 | NA                            | NA       |
| unknown     | NA    | NA       | NA       | SJC_S000730 | NA     | NA     | NA | Sjp_0062690.1 | NA                            | NA       |
| unknown     | NA    | NA       | NA       | SJC_S000730 | NA     | NA     | NA | Sjp_0062700.1 | NA                            | NA       |
| unknown     | NA    | NA       | NA       | SJC_S000730 | NA     | NA     | NA | Sjp_0062710.1 | NA                            | NA       |
| HSB10kb_888 | WZ    | 42276422 | 42341967 | SJC_S000731 | 4592   | 84764  | -  | Sjp_0062720.1 | nucleic acid binding          | NA       |

|             |    |          |          |             |       |        |    |               |                               |          |
|-------------|----|----------|----------|-------------|-------|--------|----|---------------|-------------------------------|----------|
|             |    |          |          |             |       |        |    |               | transcription factor activity |          |
| HSB10kb_888 | WZ | 42276422 | 42341967 | SJC_S000731 | 4592  | 84764  | -  | Sjp_0062730.1 | NA                            | NA       |
| HSB10kb_888 | WZ | 42276422 | 42341967 | SJC_S000731 | 4592  | 84764  | -  | Sjp_0062740.1 | NA                            | NA       |
| HSB10kb_888 | WZ | 42276422 | 42341967 | SJC_S000731 | 4592  | 84764  | -  | Sjp_0062750.1 | cell part                     | 0.009037 |
| HSB10kb_888 | WZ | 42276422 | 42341967 | SJC_S000731 | 4592  | 84764  | -  | Sjp_0062760.1 | NA                            | NA       |
| HSB10kb_888 | WZ | 42276422 | 42341967 | SJC_S000731 | 4592  | 84764  | -  | Sjp_0062770.1 | NA                            | NA       |
| unknown     | NA | NA       | NA       | SJC_S000732 | NA    | NA     | NA | Sjp_0062780.1 | NA                            | NA       |
| HSB10kb_889 | 1  | 39928267 | 39957878 | SJC_S000732 | 48985 | 73111  | +  | Sjp_0062790.1 | binding                       | 0.052762 |
| HSB10kb_889 | 1  | 39928267 | 39957878 | SJC_S000732 | 48985 | 73111  | +  | Sjp_0062800.1 | metabolic process             | 0.41934  |
| HSB10kb_889 | 1  | 39928267 | 39957878 | SJC_S000732 | 48985 | 73111  | +  | Sjp_0062810.1 | catalytic activity            | 0.035844 |
| unknown     | NA | NA       | NA       | SJC_S000733 | NA    | NA     | NA | Sjp_0062820.1 | catalytic activity            | 0.035844 |
| HSB10kb_890 | 1  | 43809563 | 43827059 | SJC_S000733 | 99102 | 121206 | +  | Sjp_0062830.1 | cell part                     | 0.009037 |
| HSB10kb_890 | 1  | 43809563 | 43827059 | SJC_S000733 | 99102 | 121206 | +  | Sjp_0062840.1 | NA                            | NA       |
| unknown     | NA | NA       | NA       | SJC_S000733 | NA    | NA     | NA | Sjp_0062850.1 | NA                            | NA       |
| unknown     | NA | NA       | NA       | SJC_S000734 | NA    | NA     | NA | Sjp_0062860.1 | NA                            | NA       |
| unknown     | NA | NA       | NA       | SJC_S000735 | NA    | NA     | NA | Sjp_0062870.1 | catalytic activity            | 0.035844 |
| unknown     | NA | NA       | NA       | SJC_S000735 | NA    | NA     | NA | Sjp_0062880.1 | cell part                     | 0.009037 |
| unknown     | NA | NA       | NA       | SJC_S000736 | NA    | NA     | NA | Sjp_0062900.1 | NA                            | NA       |
| unknown     | NA | NA       | NA       | SJC_S000737 | NA    | NA     | NA | Sjp_0062910.1 | biological regulation         | 0.76396  |
| unknown     | NA | NA       | NA       | SJC_S000739 | NA    | NA     | NA | Sjp_0062920.1 | NA                            | NA       |
| unknown     | NA | NA       | NA       | SJC_S000739 | NA    | NA     | NA | Sjp_0062930.1 | catalytic activity            | 0.035844 |
| unknown     | NA | NA       | NA       | SJC_S000739 | NA    | NA     | NA | Sjp_0062940.1 | NA                            | NA       |
| HSB10kb_891 | 1  | 44915551 | 44988577 | SJC_S000740 | 1685  | 52675  | +  | Sjp_0062950.1 | NA                            | NA       |
| HSB10kb_891 | 1  | 44915551 | 44988577 | SJC_S000740 | 1685  | 52675  | +  | Sjp_0062960.1 | biological regulation         | 0.76396  |
| HSB10kb_891 | 1  | 44915551 | 44988577 | SJC_S000740 | 1685  | 52675  | +  | Sjp_0062970.1 | NA                            | NA       |
| HSB10kb_891 | 1  | 44915551 | 44988577 | SJC_S000740 | 1685  | 52675  | +  | Sjp_0062980.1 | extracellular region part     | NA       |
| unknown     | NA | NA       | NA       | SJC_S000743 | NA    | NA     | NA | Sjp_0062990.1 | NA                            | NA       |
| unknown     | NA | NA       | NA       | SJC_S000744 | NA    | NA     | NA | Sjp_0063000.1 | NA                            | NA       |
| unknown     | NA | NA       | NA       | SJC_S000745 | NA    | NA     | NA | Sjp_0063010.1 | biological                    | 0.76396  |

|             |         |          |          |             |        |        |    |               |                       |          |
|-------------|---------|----------|----------|-------------|--------|--------|----|---------------|-----------------------|----------|
|             |         |          |          |             |        |        |    |               | regulation            |          |
| unknown     | NA      | NA       | NA       | SJC_S000746 | NA     | NA     | NA | Sjp_0063020.1 | NA                    | NA       |
| unknown     | NA      | NA       | NA       | SJC_S000746 | NA     | NA     | NA | Sjp_0063030.1 | NA                    | NA       |
| unknown     | NA      | NA       | NA       | SJC_S000746 | NA     | NA     | NA | Sjp_0063040.1 | NA                    | NA       |
| unknown     | NA      | NA       | NA       | SJC_S000746 | NA     | NA     | NA | Sjp_0063050.1 | cell part             | 0.009037 |
| unknown     | NA      | NA       | NA       | SJC_S000748 | NA     | NA     | NA | Sjp_0063060.1 | NA                    | NA       |
| HSB10kb_892 | WZ      | 23396498 | 23416774 | SJC_S000750 | 6420   | 22457  | -  | Sjp_0063070.1 | binding               | 0.052762 |
| HSB10kb_893 | 2       | 22641741 | 22715169 | SJC_S000751 | 3776   | 75646  | +  | Sjp_0063080.1 | NA                    | NA       |
| HSB10kb_893 | 2       | 22641741 | 22715169 | SJC_S000751 | 3776   | 75646  | +  | Sjp_0063090.1 | catalytic activity    | 0.035844 |
| HSB10kb_893 | 2       | 22641741 | 22715169 | SJC_S000751 | 3776   | 75646  | +  | Sjp_0063100.1 | cell part             | 0.009037 |
| EBR10kb_427 | "2,2"   | NA       | NA       | SJC_S000751 | 75647  | 119317 | NA | Sjp_0063100.1 | cell part             | 0.009037 |
| EBR10kb_427 | "2,2"   | NA       | NA       | SJC_S000751 | 75647  | 119317 | NA | Sjp_0063110.1 | NA                    | NA       |
| HSB10kb_894 | 2       | 22725385 | 22801077 | SJC_S000751 | 119318 | 165277 | -  | Sjp_0063120.1 | NA                    | NA       |
| HSB10kb_894 | 2       | 22725385 | 22801077 | SJC_S000751 | 119318 | 165277 | -  | Sjp_0063130.1 | NA                    | NA       |
| EBR10kb_428 | "2,2"   | NA       | NA       | SJC_S000751 | 165278 | 172146 | NA | Sjp_0063150.1 | catalytic activity    | 0.035844 |
| HSB10kb_895 | 2       | 22807898 | 22818181 | SJC_S000751 | 172147 | 211425 | -  | Sjp_0063150.1 | catalytic activity    | 0.035844 |
| unknown     | NA      | NA       | NA       | SJC_S000752 | NA     | NA     | NA | Sjp_0063160.1 | NA                    | NA       |
| HSB10kb_896 | 1       | 10992911 | 11149311 | SJC_S000752 | 52957  | 203906 | -  | Sjp_0063170.1 | NA                    | NA       |
| HSB10kb_896 | 1       | 10992911 | 11149311 | SJC_S000752 | 52957  | 203906 | -  | Sjp_0063180.1 | binding               | 0.052762 |
| HSB10kb_896 | 1       | 10992911 | 11149311 | SJC_S000752 | 52957  | 203906 | -  | Sjp_0063190.1 | cell part             | 0.009037 |
| HSB10kb_897 | WZ      | 8742522  | 8876806  | SJC_S000753 | 36621  | 205411 | -  | Sjp_0063200.1 | catalytic activity    | 0.035844 |
| HSB10kb_897 | WZ      | 8742522  | 8876806  | SJC_S000753 | 36621  | 205411 | -  | Sjp_0063210.1 | NA                    | NA       |
| HSB10kb_897 | WZ      | 8742522  | 8876806  | SJC_S000753 | 36621  | 205411 | -  | Sjp_0063220.1 | catalytic activity    | 0.035844 |
| HSB10kb_898 | WZ      | 30603850 | 30639365 | SJC_S000754 | 245    | 42436  | +  | Sjp_0063230.1 | biological regulation | 0.76396  |
| HSB10kb_898 | WZ      | 30603850 | 30639365 | SJC_S000754 | 245    | 42436  | +  | Sjp_0063240.1 | NA                    | NA       |
| EBR10kb_429 | "WZ,WZ" | NA       | NA       | SJC_S000754 | 42437  | 65720  | NA | NA            | NA                    | NA       |
| HSB10kb_899 | WZ      | 33182796 | 33205045 | SJC_S000754 | 65721  | 81245  |    | Sjp_0063250.1 | cellular process      | 0.63852  |
| HSB10kb_899 | WZ      | 33182796 | 33205045 | SJC_S000754 | 65721  | 81245  |    | Sjp_0063260.1 | NA                    | NA       |
| EBR10kb_430 | "WZ,WZ" | NA       | NA       | SJC_S000754 | 81246  | 83862  | NA | Sjp_0063260.1 | NA                    | NA       |
| HSB10kb_900 | WZ      | 33208895 | 33241825 | SJC_S000754 | 83863  | 125105 | -  | Sjp_0063260.1 | NA                    | NA       |
| HSB10kb_900 | WZ      | 33208895 | 33241825 | SJC_S000754 | 83863  | 125105 | -  | Sjp_0063270.1 | NA                    | NA       |
| EBR10kb_431 | "WZ,WZ" | NA       | NA       | SJC_S000754 | 125106 | 129596 | NA | Sjp_0063270.1 | NA                    | NA       |
| HSB10kb_901 | WZ      | 33243477 | 33253549 | SJC_S000754 | 129597 | 140583 |    | Sjp_0063280.1 | NA                    | NA       |

|             |         |          |          |             |        |        |    |               |                           |          |
|-------------|---------|----------|----------|-------------|--------|--------|----|---------------|---------------------------|----------|
| EBR10kb_432 | "WZ,WZ" | NA       | NA       | SJC_S000754 | 140584 | 175358 | NA | Sjp_0063280.1 | NA                        | NA       |
| HSB10kb_902 | WZ      | 33357825 | 33382040 | SJC_S000754 | 175359 | 197512 | +  | Sjp_0063280.1 | NA                        | NA       |
| HSB10kb_902 | WZ      | 33357825 | 33382040 | SJC_S000754 | 175359 | 197512 | +  | Sjp_0063290.1 | cell part                 | 0.009037 |
| HSB10kb_902 | WZ      | 33357825 | 33382040 | SJC_S000754 | 175359 | 197512 | +  | Sjp_0063300.1 | NA                        | NA       |
| unknown     | NA      | NA       | NA       | SJC_S000755 | NA     | NA     | NA | Sjp_0063310.1 | NA                        | NA       |
| HSB10kb_903 | 2       | 8529967  | 8578624  | SJC_S000755 | 83617  | 128601 | +  | Sjp_0063330.1 | NA                        | NA       |
| HSB10kb_903 | 2       | 8529967  | 8578624  | SJC_S000755 | 83617  | 128601 | +  | Sjp_0063340.1 | NA                        | NA       |
| unknown     | NA      | NA       | NA       | SJC_S000755 | NA     | NA     | NA | Sjp_0063350.1 | cellular process          | 0.63852  |
| unknown     | NA      | NA       | NA       | SJC_S000755 | NA     | NA     | NA | Sjp_0063360.1 | cellular process          | 0.63852  |
| unknown     | NA      | NA       | NA       | SJC_S000755 | NA     | NA     | NA | Sjp_0063370.1 | NA                        | NA       |
| unknown     | NA      | NA       | NA       | SJC_S000755 | NA     | NA     | NA | Sjp_0063380.1 | cellular process          | 0.63852  |
| unknown     | NA      | NA       | NA       | SJC_S000756 | NA     | NA     | NA | Sjp_0063390.1 | NA                        | NA       |
| unknown     | NA      | NA       | NA       | SJC_S000756 | NA     | NA     | NA | Sjp_0063400.1 | NA                        | NA       |
| unknown     | NA      | NA       | NA       | SJC_S000756 | NA     | NA     | NA | Sjp_0063410.1 | NA                        | NA       |
| HSB10kb_904 | 4       | 9626517  | 9772534  | SJC_S000757 | 23682  | 176686 | +  | Sjp_0063420.1 | catalytic activity        | 0.035844 |
| HSB10kb_904 | 4       | 9626517  | 9772534  | SJC_S000757 | 23682  | 176686 | +  | Sjp_0063430.1 | NA                        | NA       |
| HSB10kb_904 | 4       | 9626517  | 9772534  | SJC_S000757 | 23682  | 176686 | +  | Sjp_0063440.1 | NA                        | NA       |
| HSB10kb_904 | 4       | 9626517  | 9772534  | SJC_S000757 | 23682  | 176686 | +  | Sjp_0063450.1 | cellular process          | 0.63852  |
| HSB10kb_905 | 1       | 28272846 | 28455710 | SJC_S000758 | 11338  | 204665 | -  | Sjp_0063460.1 | NA                        | NA       |
| HSB10kb_905 | 1       | 28272846 | 28455710 | SJC_S000758 | 11338  | 204665 | -  | Sjp_0063470.1 | enzyme regulator activity | 0.1755   |
| HSB10kb_905 | 1       | 28272846 | 28455710 | SJC_S000758 | 11338  | 204665 | -  | Sjp_0063480.1 | NA                        | NA       |
| HSB10kb_905 | 1       | 28272846 | 28455710 | SJC_S000758 | 11338  | 204665 | -  | Sjp_0063490.1 | NA                        | NA       |
| HSB10kb_905 | 1       | 28272846 | 28455710 | SJC_S000758 | 11338  | 204665 | -  | Sjp_0063500.1 | binding                   | 0.052762 |
| unknown     | NA      | NA       | NA       | SJC_S000759 | NA     | NA     | NA | Sjp_0063520.1 | catalytic activity        | 0.035844 |
| unknown     | NA      | NA       | NA       | SJC_S000759 | NA     | NA     | NA | Sjp_0063530.1 | cell part                 | 0.009037 |
| unknown     | NA      | NA       | NA       | SJC_S000759 | NA     | NA     | NA | Sjp_0063540.1 | NA                        | NA       |
| unknown     | NA      | NA       | NA       | SJC_S000759 | NA     | NA     | NA | Sjp_0063550.1 | catalytic activity        | 0.035844 |
| HSB10kb_906 | 2       | 14927345 | 14994884 | SJC_S000761 | 3948   | 32406  | +  | Sjp_0063560.1 | biological regulation     | 0.76396  |
| HSB10kb_906 | 2       | 14927345 | 14994884 | SJC_S000761 | 3948   | 32406  | +  | Sjp_0063570.1 | catalytic activity        | 0.035844 |
| EBR10kb_433 | "2,2"   | NA       | NA       | SJC_S000761 | 32407  | 51224  | NA | Sjp_0063570.1 | catalytic activity        | 0.035844 |
| EBR10kb_433 | "2,2"   | NA       | NA       | SJC_S000761 | 32407  | 51224  | NA | Sjp_0063580.1 | NA                        | NA       |

|             |       |          |          |             |       |        |    |               |                       |          |
|-------------|-------|----------|----------|-------------|-------|--------|----|---------------|-----------------------|----------|
| EBR10kb_433 | "2,2" | NA       | NA       | SJC_S000761 | 32407 | 51224  | NA | Sjp_0063590.1 | biological regulation | 0.76396  |
| EBR10kb_433 | "2,2" | NA       | NA       | SJC_S000761 | 32407 | 51224  | NA | Sjp_0063600.1 | NA                    | NA       |
| HSB10kb_907 | 2     | 14896409 | 14922813 | SJC_S000761 | 51225 | 79514  | +  | Sjp_0063600.1 | NA                    | NA       |
| HSB10kb_907 | 2     | 14896409 | 14922813 | SJC_S000761 | 51225 | 79514  | +  | Sjp_0063610.1 | NA                    | NA       |
| unknown     | NA    | NA       | NA       | SJC_S000761 | NA    | NA     | NA | Sjp_0063620.1 | NA                    | NA       |
| HSB10kb_908 | 1     | 507677   | 560543   | SJC_S000762 | 12708 | 82545  | -  | Sjp_0063630.1 | binding               | 0.052762 |
| HSB10kb_908 | 1     | 507677   | 560543   | SJC_S000762 | 12708 | 82545  | -  | Sjp_0063640.1 | catalytic activity    | 0.035844 |
| unknown     | NA    | NA       | NA       | SJC_S000763 | NA    | NA     | NA | Sjp_0063650.1 | NA                    | NA       |
| unknown     | NA    | NA       | NA       | SJC_S000763 | NA    | NA     | NA | Sjp_0063660.1 | NA                    | NA       |
| HSB10kb_909 | WZ    | 54716660 | 54800782 | SJC_S000764 | 2870  | 74191  | -  | Sjp_0063670.1 | binding               | 0.052762 |
| HSB10kb_909 | WZ    | 54716660 | 54800782 | SJC_S000764 | 2870  | 74191  | -  | Sjp_0063680.1 | cell part             | 0.009037 |
| unknown     | NA    | NA       | NA       | SJC_S000766 | NA    | NA     | NA | Sjp_0063690.1 | NA                    | NA       |
| unknown     | NA    | NA       | NA       | SJC_S000766 | NA    | NA     | NA | Sjp_0063700.1 | NA                    | NA       |
| unknown     | NA    | NA       | NA       | SJC_S000766 | NA    | NA     | NA | Sjp_0063710.1 | NA                    | NA       |
| unknown     | NA    | NA       | NA       | SJC_S000767 | NA    | NA     | NA | Sjp_0063720.1 | NA                    | NA       |
| unknown     | NA    | NA       | NA       | SJC_S000767 | NA    | NA     | NA | Sjp_0063730.1 | NA                    | NA       |
| unknown     | NA    | NA       | NA       | SJC_S000768 | NA    | NA     | NA | Sjp_0063740.1 | NA                    | NA       |
| unknown     | NA    | NA       | NA       | SJC_S000768 | NA    | NA     | NA | Sjp_0063750.1 | NA                    | NA       |
| unknown     | NA    | NA       | NA       | SJC_S000769 | NA    | NA     | NA | Sjp_0063760.1 | cell part             | 0.009037 |
| HSB10kb_910 | 1     | 666888   | 776887   | SJC_S000769 | 69271 | 117168 | -  | Sjp_0063780.1 | NA                    | NA       |
| unknown     | NA    | NA       | NA       | SJC_S000770 | NA    | NA     | NA | Sjp_0063790.1 | NA                    | NA       |
| unknown     | NA    | NA       | NA       | SJC_S000771 | NA    | NA     | NA | Sjp_0063810.1 | cell part             | 0.009037 |
| unknown     | NA    | NA       | NA       | SJC_S000771 | NA    | NA     | NA | Sjp_0063820.1 | NA                    | NA       |
| unknown     | NA    | NA       | NA       | SJC_S000772 | NA    | NA     | NA | Sjp_0063830.1 | cell part             | 0.009037 |
| unknown     | NA    | NA       | NA       | SJC_S000772 | NA    | NA     | NA | Sjp_0063840.1 | NA                    | NA       |
| unknown     | NA    | NA       | NA       | SJC_S000772 | NA    | NA     | NA | Sjp_0063850.1 | cell part             | 0.009037 |
| unknown     | NA    | NA       | NA       | SJC_S000772 | NA    | NA     | NA | Sjp_0063860.1 | cell part             | 0.009037 |
| HSB10kb_911 | WZ    | 32071172 | 32149402 | SJC_S000773 | 2024  | 73367  | +  | Sjp_0063870.1 | NA                    | NA       |
| HSB10kb_911 | WZ    | 32071172 | 32149402 | SJC_S000773 | 2024  | 73367  | +  | Sjp_0063880.1 | NA                    | NA       |
| HSB10kb_911 | WZ    | 32071172 | 32149402 | SJC_S000773 | 2024  | 73367  | +  | Sjp_0063890.1 | cell part             | 0.009037 |
| HSB10kb_911 | WZ    | 32071172 | 32149402 | SJC_S000773 | 2024  | 73367  | +  | Sjp_0063900.1 | NA                    | NA       |
| unknown     | NA    | NA       | NA       | SJC_S000775 | NA    | NA     | NA | Sjp_0063910.1 | binding               | 0.052762 |
| unknown     | NA    | NA       | NA       | SJC_S000775 | NA    | NA     | NA | Sjp_0063920.1 | NA                    | NA       |

|             |    |          |          |             |      |        |    |               |                           |          |
|-------------|----|----------|----------|-------------|------|--------|----|---------------|---------------------------|----------|
| HSB10kb_912 | WZ | 45888545 | 46042016 | SJC_S000776 | 291  | 148304 | +  | Sjp_0063930.1 | NA                        | NA       |
| HSB10kb_912 | WZ | 45888545 | 46042016 | SJC_S000776 | 291  | 148304 | +  | Sjp_0063940.1 | NA                        | NA       |
| HSB10kb_912 | WZ | 45888545 | 46042016 | SJC_S000776 | 291  | 148304 | +  | Sjp_0063950.1 | catalytic activity        | 0.035844 |
| HSB10kb_912 | WZ | 45888545 | 46042016 | SJC_S000776 | 291  | 148304 | +  | Sjp_0063960.1 | NA                        | NA       |
| unknown     | NA | NA       | NA       | SJC_S000777 | NA   | NA     | NA | Sjp_0063980.1 | NA                        | NA       |
| unknown     | NA | NA       | NA       | SJC_S000778 | NA   | NA     | NA | Sjp_0063990.1 | NA                        | NA       |
| unknown     | NA | NA       | NA       | SJC_S000779 | NA   | NA     | NA | Sjp_0064000.1 | NA                        | NA       |
| unknown     | NA | NA       | NA       | SJC_S000779 | NA   | NA     | NA | Sjp_0064010.1 | binding                   | 0.052762 |
| unknown     | NA | NA       | NA       | SJC_S000779 | NA   | NA     | NA | Sjp_0064020.1 | catalytic activity        | 0.035844 |
| unknown     | NA | NA       | NA       | SJC_S000780 | NA   | NA     | NA | Sjp_0064030.1 | NA                        | NA       |
| unknown     | NA | NA       | NA       | SJC_S000780 | NA   | NA     | NA | Sjp_0064040.1 | biological regulation     | 0.76396  |
| unknown     | NA | NA       | NA       | SJC_S000781 | NA   | NA     | NA | Sjp_0064050.1 | NA                        | NA       |
| unknown     | NA | NA       | NA       | SJC_S000781 | NA   | NA     | NA | Sjp_0064060.1 | NA                        | NA       |
| unknown     | NA | NA       | NA       | SJC_S000781 | NA   | NA     | NA | Sjp_0064070.1 | NA                        | NA       |
| unknown     | NA | NA       | NA       | SJC_S000781 | NA   | NA     | NA | Sjp_0064080.1 | NA                        | NA       |
| unknown     | NA | NA       | NA       | SJC_S000781 | NA   | NA     | NA | Sjp_0064090.1 | NA                        | NA       |
| unknown     | NA | NA       | NA       | SJC_S000781 | NA   | NA     | NA | Sjp_0064100.1 | NA                        | NA       |
| unknown     | NA | NA       | NA       | SJC_S000781 | NA   | NA     | NA | Sjp_0064110.1 | NA                        | NA       |
| unknown     | NA | NA       | NA       | SJC_S000781 | NA   | NA     | NA | Sjp_0064120.1 | metabolic process         | 0.41934  |
| unknown     | NA | NA       | NA       | SJC_S000782 | NA   | NA     | NA | Sjp_0064130.1 | NA                        | NA       |
| unknown     | NA | NA       | NA       | SJC_S000782 | NA   | NA     | NA | Sjp_0064140.1 | catalytic activity        | 0.035844 |
| unknown     | NA | NA       | NA       | SJC_S000782 | NA   | NA     | NA | Sjp_0064150.1 | enzyme regulator activity | 0.1755   |
| HSB10kb_913 | WZ | 18173960 | 18321964 | SJC_S000783 | 3237 | 111000 | -  | Sjp_0064160.1 | NA                        | NA       |
| HSB10kb_913 | WZ | 18173960 | 18321964 | SJC_S000783 | 3237 | 111000 | -  | Sjp_0064170.1 | NA                        | NA       |
| HSB10kb_913 | WZ | 18173960 | 18321964 | SJC_S000783 | 3237 | 111000 | -  | Sjp_0064180.1 | NA                        | NA       |
| unknown     | NA | NA       | NA       | SJC_S000785 | NA   | NA     | NA | Sjp_0064190.1 | NA                        | NA       |
| unknown     | NA | NA       | NA       | SJC_S000785 | NA   | NA     | NA | Sjp_0064200.1 | NA                        | NA       |
| unknown     | NA | NA       | NA       | SJC_S000785 | NA   | NA     | NA | Sjp_0064210.1 | cell part                 | 0.009037 |
| unknown     | NA | NA       | NA       | SJC_S000785 | NA   | NA     | NA | Sjp_0064220.1 | NA                        | NA       |
| unknown     | NA | NA       | NA       | SJC_S000786 | NA   | NA     | NA | Sjp_0064230.1 | NA                        | NA       |



|             |    |          |          |             |       |        |    |               |                               |          |
|-------------|----|----------|----------|-------------|-------|--------|----|---------------|-------------------------------|----------|
| HSB10kb_914 | WZ | 18987401 | 19008584 | SJC_S000787 | 3359  | 13873  | -  | Sjp_0064240.1 | NA                            | NA       |
| unknown     | NA | NA       | NA       | SJC_S000788 | NA    | NA     | NA | Sjp_0064250.1 | biological regulation         | 0.76396  |
| unknown     | NA | NA       | NA       | SJC_S000789 | NA    | NA     | NA | Sjp_0064260.1 | NA                            | NA       |
| unknown     | NA | NA       | NA       | SJC_S000789 | NA    | NA     | NA | Sjp_0064270.1 | NA                            | NA       |
| unknown     | NA | NA       | NA       | SJC_S000790 | NA    | NA     | NA | Sjp_0064280.1 | NA                            | NA       |
| unknown     | NA | NA       | NA       | SJC_S000790 | NA    | NA     | NA | Sjp_0064290.1 | NA                            | NA       |
| unknown     | NA | NA       | NA       | SJC_S000790 | NA    | NA     | NA | Sjp_0064300.1 | transporter activity          | 0.782    |
| unknown     | NA | NA       | NA       | SJC_S000790 | NA    | NA     | NA | Sjp_0064310.1 | NA                            | NA       |
| unknown     | NA | NA       | NA       | SJC_S000790 | NA    | NA     | NA | Sjp_0064320.1 | NA                            | NA       |
| unknown     | NA | NA       | NA       | SJC_S000790 | NA    | NA     | NA | Sjp_0064330.1 | NA                            | NA       |
| unknown     | NA | NA       | NA       | SJC_S000790 | NA    | NA     | NA | Sjp_0064340.1 | NA                            | NA       |
| unknown     | NA | NA       | NA       | SJC_S000790 | NA    | NA     | NA | Sjp_0064350.1 | cell part                     | 0.009037 |
| unknown     | NA | NA       | NA       | SJC_S000791 | NA    | NA     | NA | Sjp_0064360.1 | response to stimulus          | NA       |
| unknown     | NA | NA       | NA       | SJC_S000791 | NA    | NA     | NA | Sjp_0064370.1 | NA                            | NA       |
| unknown     | NA | NA       | NA       | SJC_S000791 | NA    | NA     | NA | Sjp_0064380.1 | establishment of localization | NA       |
| unknown     | NA | NA       | NA       | SJC_S000791 | NA    | NA     | NA | Sjp_0064390.1 | NA                            | NA       |
| unknown     | NA | NA       | NA       | SJC_S000791 | NA    | NA     | NA | Sjp_0064400.1 | cell part                     | 0.009037 |
| unknown     | NA | NA       | NA       | SJC_S000791 | NA    | NA     | NA | Sjp_0064410.1 | catalytic activity            | 0.035844 |
| unknown     | NA | NA       | NA       | SJC_S000791 | NA    | NA     | NA | Sjp_0064420.1 | cell part                     | 0.009037 |
| unknown     | NA | NA       | NA       | SJC_S000792 | NA    | NA     | NA | Sjp_0064430.1 | NA                            | NA       |
| unknown     | NA | NA       | NA       | SJC_S000792 | NA    | NA     | NA | Sjp_0064450.1 | cell part                     | 0.009037 |
| HSB10kb_915 | WZ | 10419861 | 10701237 | SJC_S000793 | 11545 | 341421 | +  | Sjp_0064460.1 | NA                            | NA       |
| HSB10kb_915 | WZ | 10419861 | 10701237 | SJC_S000793 | 11545 | 341421 | +  | Sjp_0064470.1 | NA                            | NA       |
| HSB10kb_915 | WZ | 10419861 | 10701237 | SJC_S000793 | 11545 | 341421 | +  | Sjp_0064480.1 | NA                            | NA       |
| HSB10kb_915 | WZ | 10419861 | 10701237 | SJC_S000793 | 11545 | 341421 | +  | Sjp_0064490.1 | NA                            | NA       |
| HSB10kb_915 | WZ | 10419861 | 10701237 | SJC_S000793 | 11545 | 341421 | +  | Sjp_0064500.1 | NA                            | NA       |
| HSB10kb_915 | WZ | 10419861 | 10701237 | SJC_S000793 | 11545 | 341421 | +  | Sjp_0064510.1 | cellular process              | 0.63852  |
| HSB10kb_915 | WZ | 10419861 | 10701237 | SJC_S000793 | 11545 | 341421 | +  | Sjp_0064520.1 | NA                            | NA       |
| HSB10kb_916 | 1  | 54875714 | 54896197 | SJC_S000794 | 15639 | 28895  | +  | Sjp_0064530.1 | transporter activity          | 0.782    |

|             |       |          |          |             |       |        |    |               |                                                    |          |
|-------------|-------|----------|----------|-------------|-------|--------|----|---------------|----------------------------------------------------|----------|
| HSB10kb_916 | 1     | 54875714 | 54896197 | SJC_S000794 | 15639 | 28895  | +  | Sjp_0064540.1 | biological regulation                              | 0.76396  |
| EBR10kb_434 | "1,1" | NA       | NA       | SJC_S000794 | 28896 | 74577  | NA | Sjp_0064540.1 | biological regulation                              | 0.76396  |
| EBR10kb_434 | "1,1" | NA       | NA       | SJC_S000794 | 28896 | 74577  | NA | Sjp_0064550.1 | nucleic acid binding transcription factor activity | NA       |
| EBR10kb_434 | "1,1" | NA       | NA       | SJC_S000794 | 28896 | 74577  | NA | Sjp_0064560.1 | nucleic acid binding transcription factor activity | NA       |
| HSB10kb_917 | 1     | 54901116 | 54924782 | SJC_S000794 | 74578 | 102665 | -  | Sjp_0064560.1 | nucleic acid binding transcription factor activity | NA       |
| unknown     | NA    | NA       | NA       | SJC_S000795 | NA    | NA     | NA | Sjp_0064570.1 | NA                                                 | NA       |
| unknown     | NA    | NA       | NA       | SJC_S000796 | NA    | NA     | NA | Sjp_0064580.1 | cell part                                          | 0.009037 |
| unknown     | NA    | NA       | NA       | SJC_S000796 | NA    | NA     | NA | Sjp_0064590.1 | NA                                                 | NA       |
| unknown     | NA    | NA       | NA       | SJC_S000796 | NA    | NA     | NA | Sjp_0064600.1 | NA                                                 | NA       |
| HSB10kb_918 | 7     | 4880810  | 4951470  | SJC_S000797 | 45741 | 98076  | -  | Sjp_0064610.1 | biological regulation                              | 0.76396  |
| unknown     | NA    | NA       | NA       | SJC_S000798 | NA    | NA     | NA | Sjp_0064630.1 | transporter activity                               | 0.782    |
| unknown     | NA    | NA       | NA       | SJC_S000798 | NA    | NA     | NA | Sjp_0064650.1 | NA                                                 | NA       |
| unknown     | NA    | NA       | NA       | SJC_S000798 | NA    | NA     | NA | Sjp_0064670.1 | NA                                                 | NA       |
| unknown     | NA    | NA       | NA       | SJC_S000798 | NA    | NA     | NA | Sjp_0064680.1 | catalytic activity                                 | 0.035844 |
| HSB10kb_919 | 2     | 18414729 | 18428084 | SJC_S000799 | 11238 | 22194  | -  | Sjp_0064690.1 | NA                                                 | NA       |
| unknown     | NA    | NA       | NA       | SJC_S000799 | NA    | NA     | NA | Sjp_0064700.1 | NA                                                 | NA       |
| unknown     | NA    | NA       | NA       | SJC_S000800 | NA    | NA     | NA | Sjp_0064710.1 | biological regulation                              | 0.76396  |
| HSB10kb_920 | 1     | 34042782 | 34181120 | SJC_S000800 | 31041 | 165960 | +  | NA            | NA                                                 | NA       |
| HSB10kb_921 | 4     | 28830841 | 28938984 | SJC_S000801 | 51413 | 153532 | -  | Sjp_0064730.1 | NA                                                 | NA       |
| HSB10kb_921 | 4     | 28830841 | 28938984 | SJC_S000801 | 51413 | 153532 | -  | Sjp_0064740.1 | NA                                                 | NA       |
| HSB10kb_921 | 4     | 28830841 | 28938984 | SJC_S000801 | 51413 | 153532 | -  | Sjp_0064750.1 | NA                                                 | NA       |

|             |       |          |          |             |        |        |    |               |                           |          |
|-------------|-------|----------|----------|-------------|--------|--------|----|---------------|---------------------------|----------|
| HSB10kb_921 | 4     | 28830841 | 28938984 | SJC_S000801 | 51413  | 153532 | -  | Sjp_0064760.1 | cell part                 | 0.009037 |
| HSB10kb_922 | 1     | 52304654 | 52438038 | SJC_S000802 | 21134  | 134894 | -  | Sjp_0064770.1 | NA                        | NA       |
| HSB10kb_922 | 1     | 52304654 | 52438038 | SJC_S000802 | 21134  | 134894 | -  | Sjp_0064780.1 | NA                        | NA       |
| HSB10kb_922 | 1     | 52304654 | 52438038 | SJC_S000802 | 21134  | 134894 | -  | Sjp_0064790.1 | NA                        | NA       |
| HSB10kb_922 | 1     | 52304654 | 52438038 | SJC_S000802 | 21134  | 134894 | -  | Sjp_0064800.1 | transporter activity      | 0.782    |
| EBR10kb_435 | "1,1" | NA       | NA       | SJC_S000802 | 134895 | 137601 | NA | Sjp_0064800.1 | transporter activity      | 0.782    |
| HSB10kb_923 | 1     | 52241594 | 52280754 | SJC_S000802 | 137602 | 180837 | +  | Sjp_0064800.1 | transporter activity      | 0.782    |
| EBR10kb_436 | "1,1" | NA       | NA       | SJC_S000802 | 180838 | 196366 | NA | Sjp_0064810.1 | NA                        | NA       |
| HSB10kb_924 | 1     | 52173049 | 52212567 | SJC_S000802 | 196367 | 236614 | -  | Sjp_0064810.1 | NA                        | NA       |
| HSB10kb_924 | 1     | 52173049 | 52212567 | SJC_S000802 | 196367 | 236614 | -  | Sjp_0064820.1 | NA                        | NA       |
| unknown     | NA    | NA       | NA       | SJC_S000803 | NA     | NA     | NA | Sjp_0064830.1 | virion part               | NA       |
| unknown     | NA    | NA       | NA       | SJC_S000803 | NA     | NA     | NA | Sjp_0064840.1 | catalytic activity        | 0.035844 |
| unknown     | NA    | NA       | NA       | SJC_S000803 | NA     | NA     | NA | Sjp_0064850.1 | NA                        | NA       |
| unknown     | NA    | NA       | NA       | SJC_S000803 | NA     | NA     | NA | Sjp_0064860.1 | NA                        | NA       |
| HSB10kb_925 | 1     | 40494517 | 40513940 | SJC_S000804 | 592    | 17542  | -  | Sjp_0064870.1 | catalytic activity        | 0.035844 |
| HSB10kb_925 | 1     | 40494517 | 40513940 | SJC_S000804 | 592    | 17542  | -  | Sjp_0064880.1 | NA                        | NA       |
| unknown     | NA    | NA       | NA       | SJC_S000804 | NA     | NA     | NA | Sjp_0064890.1 | NA                        | NA       |
| unknown     | NA    | NA       | NA       | SJC_S000804 | NA     | NA     | NA | Sjp_0064900.1 | cell part                 | 0.009037 |
| unknown     | NA    | NA       | NA       | SJC_S000804 | NA     | NA     | NA | Sjp_0064910.1 | catalytic activity        | 0.035844 |
| unknown     | NA    | NA       | NA       | SJC_S000804 | NA     | NA     | NA | Sjp_0064920.1 | NA                        | NA       |
| unknown     | NA    | NA       | NA       | SJC_S000804 | NA     | NA     | NA | Sjp_0064930.1 | catalytic activity        | 0.035844 |
| unknown     | NA    | NA       | NA       | SJC_S000804 | NA     | NA     | NA | Sjp_0064940.1 | NA                        | NA       |
| unknown     | NA    | NA       | NA       | SJC_S000805 | NA     | NA     | NA | Sjp_0064950.1 | NA                        | NA       |
| unknown     | NA    | NA       | NA       | SJC_S000805 | NA     | NA     | NA | Sjp_0064960.1 | NA                        | NA       |
| HSB10kb_926 | 4     | 6414822  | 6446963  | SJC_S000806 | 16069  | 56958  | +  | Sjp_0064970.1 | NA                        | NA       |
| HSB10kb_926 | 4     | 6414822  | 6446963  | SJC_S000806 | 16069  | 56958  | +  | Sjp_0064980.1 | enzyme regulator activity | 0.1755   |
| unknown     | NA    | NA       | NA       | SJC_S000806 | NA     | NA     | NA | Sjp_0064990.1 | enzyme regulator activity | 0.1755   |

|             |         |          |          |             |        |        |    |               |                               |          |
|-------------|---------|----------|----------|-------------|--------|--------|----|---------------|-------------------------------|----------|
| unknown     | NA      | NA       | NA       | SJC_S000807 | NA     | NA     | NA | Sjp_0065000.1 | establishment of localization | NA       |
| HSB10kb_927 | WZ      | 28073478 | 28135372 | SJC_S000807 | 114037 | 156803 | -  | Sjp_0065010.1 | NA                            | NA       |
| HSB10kb_927 | WZ      | 28073478 | 28135372 | SJC_S000807 | 114037 | 156803 | -  | Sjp_0065020.1 | NA                            | NA       |
| EBR10kb_437 | "WZ,WZ" | NA       | NA       | SJC_S000807 | 156804 | 159591 | NA | Sjp_0065020.1 | NA                            | NA       |
| HSB10kb_928 | WZ      | 28277173 | 28315275 | SJC_S000807 | 159592 | 184653 | -  | Sjp_0065020.1 | NA                            | NA       |
| HSB10kb_928 | WZ      | 28277173 | 28315275 | SJC_S000807 | 159592 | 184653 | -  | Sjp_0065030.1 | NA                            | NA       |
| HSB10kb_929 | 1       | 17428480 | 17489198 | SJC_S000808 | 6316   | 126057 | -  | Sjp_0065040.1 | NA                            | NA       |
| HSB10kb_929 | 1       | 17428480 | 17489198 | SJC_S000808 | 6316   | 126057 | -  | Sjp_0065050.1 | NA                            | NA       |
| HSB10kb_929 | 1       | 17428480 | 17489198 | SJC_S000808 | 6316   | 126057 | -  | Sjp_0065060.1 | catalytic activity            | 0.035844 |
| HSB10kb_929 | 1       | 17428480 | 17489198 | SJC_S000808 | 6316   | 126057 | -  | Sjp_0065070.1 | NA                            | NA       |
| HSB10kb_929 | 1       | 17428480 | 17489198 | SJC_S000808 | 6316   | 126057 | -  | Sjp_0065080.1 | binding                       | 0.052762 |
| HSB10kb_929 | 1       | 17428480 | 17489198 | SJC_S000808 | 6316   | 126057 | -  | Sjp_0065090.1 | binding                       | 0.052762 |
| HSB10kb_929 | 1       | 17428480 | 17489198 | SJC_S000808 | 6316   | 126057 | -  | Sjp_0065100.1 | cellular process              | 0.63852  |
| EBR10kb_438 | "1,1"   | NA       | NA       | SJC_S000808 | 126058 | 244952 | NA | Sjp_0065100.1 | cellular process              | 0.63852  |
| EBR10kb_438 | "1,1"   | NA       | NA       | SJC_S000808 | 126058 | 244952 | NA | Sjp_0065110.1 | NA                            | NA       |
| EBR10kb_438 | "1,1"   | NA       | NA       | SJC_S000808 | 126058 | 244952 | NA | Sjp_0065120.1 | catalytic activity            | 0.035844 |
| HSB10kb_930 | 1       | 21279618 | 21382043 | SJC_S000808 | 244953 | 350086 | -  | Sjp_0065120.1 | catalytic activity            | 0.035844 |
| HSB10kb_930 | 1       | 21279618 | 21382043 | SJC_S000808 | 244953 | 350086 | -  | Sjp_0065130.1 | biological regulation         | 0.76396  |
| HSB10kb_930 | 1       | 21279618 | 21382043 | SJC_S000808 | 244953 | 350086 | -  | Sjp_0065140.1 | NA                            | NA       |
| HSB10kb_931 | 5       | 4467310  | 4860049  | SJC_S000809 | 9836   | 365534 | +  | Sjp_0065150.1 | NA                            | NA       |
| HSB10kb_931 | 5       | 4467310  | 4860049  | SJC_S000809 | 9836   | 365534 | +  | Sjp_0065160.1 | catalytic activity            | 0.035844 |
| HSB10kb_931 | 5       | 4467310  | 4860049  | SJC_S000809 | 9836   | 365534 | +  | Sjp_0065170.1 | NA                            | NA       |
| HSB10kb_931 | 5       | 4467310  | 4860049  | SJC_S000809 | 9836   | 365534 | +  | Sjp_0065180.1 | NA                            | NA       |
| HSB10kb_931 | 5       | 4467310  | 4860049  | SJC_S000809 | 9836   | 365534 | +  | Sjp_0065190.1 | NA                            | NA       |
| HSB10kb_931 | 5       | 4467310  | 4860049  | SJC_S000809 | 9836   | 365534 | +  | Sjp_0065200.1 | cell part                     | 0.009037 |
| HSB10kb_931 | 5       | 4467310  | 4860049  | SJC_S000809 | 9836   | 365534 | +  | Sjp_0065210.1 | NA                            | NA       |
| HSB10kb_931 | 5       | 4467310  | 4860049  | SJC_S000809 | 9836   | 365534 | +  | Sjp_0065220.1 | NA                            | NA       |
| unknown     | NA      | NA       | NA       | SJC_S000810 | NA     | NA     | NA | Sjp_0065230.1 | NA                            | NA       |
| unknown     | NA      | NA       | NA       | SJC_S000810 | NA     | NA     | NA | Sjp_0065240.1 | catalytic activity            | 0.035844 |
| unknown     | NA      | NA       | NA       | SJC_S000810 | NA     | NA     | NA | Sjp_0065250.1 | NA                            | NA       |
| unknown     | NA      | NA       | NA       | SJC_S000810 | NA     | NA     | NA | Sjp_0065260.1 | NA                            | NA       |
| unknown     | NA      | NA       | NA       | SJC_S000810 | NA     | NA     | NA | Sjp_0065270.1 | NA                            | NA       |

|             |        |          |          |             |        |        |    |               |                                               |          |
|-------------|--------|----------|----------|-------------|--------|--------|----|---------------|-----------------------------------------------|----------|
| HSB10kb_932 | 4      | 7783679  | 7836418  | SJC_S000811 | 1127   | 75907  | -  | Sjp_0065280.1 | cellular process                              | 0.63852  |
| HSB10kb_932 | 4      | 7783679  | 7836418  | SJC_S000811 | 1127   | 75907  | -  | Sjp_0065290.1 | catalytic activity                            | 0.035844 |
| HSB10kb_932 | 4      | 7783679  | 7836418  | SJC_S000811 | 1127   | 75907  | -  | Sjp_0065300.1 | NA                                            | NA       |
| EBR10kb_439 | "4,WZ" | NA       | NA       | SJC_S000811 | 75908  | 100392 | NA | Sjp_0065320.1 | catalytic activity                            | 0.035844 |
| HSB10kb_933 | WZ     | 34211474 | 34234465 | SJC_S000811 | 100393 | 118962 | -  | Sjp_0065320.1 | catalytic activity                            | 0.035844 |
| HSB10kb_934 | 5      | 8839213  | 8887569  | SJC_S000812 | 7241   | 71417  | +  | Sjp_0065330.1 | NA                                            | NA       |
| HSB10kb_934 | 5      | 8839213  | 8887569  | SJC_S000812 | 7241   | 71417  | +  | Sjp_0065340.1 | NA                                            | NA       |
| HSB10kb_934 | 5      | 8839213  | 8887569  | SJC_S000812 | 7241   | 71417  | +  | Sjp_0065350.1 | cellular component organization or biogenesis | NA       |
| HSB10kb_934 | 5      | 8839213  | 8887569  | SJC_S000812 | 7241   | 71417  | +  | Sjp_0065360.1 | cellular component organization or biogenesis | NA       |
| unknown     | NA     | NA       | NA       | SJC_S000813 | NA     | NA     | NA | Sjp_0065370.1 | molecular transducer activity                 | 0.50162  |
| unknown     | NA     | NA       | NA       | SJC_S000813 | NA     | NA     | NA | Sjp_0065380.1 | NA                                            | NA       |
| unknown     | NA     | NA       | NA       | SJC_S000814 | NA     | NA     | NA | Sjp_0065390.1 | establishment of localization                 | NA       |
| unknown     | NA     | NA       | NA       | SJC_S000814 | NA     | NA     | NA | Sjp_0065400.1 | NA                                            | NA       |
| unknown     | NA     | NA       | NA       | SJC_S000817 | NA     | NA     | NA | Sjp_0065410.1 | NA                                            | NA       |
| unknown     | NA     | NA       | NA       | SJC_S000817 | NA     | NA     | NA | Sjp_0065420.1 | NA                                            | NA       |
| HSB10kb_935 | 1      | 23143951 | 23232512 | SJC_S000817 | 51409  | 146460 | +  | Sjp_0065430.1 | binding                                       | 0.052762 |
| HSB10kb_935 | 1      | 23143951 | 23232512 | SJC_S000817 | 51409  | 146460 | +  | Sjp_0065440.1 | cell part                                     | 0.009037 |
| HSB10kb_935 | 1      | 23143951 | 23232512 | SJC_S000817 | 51409  | 146460 | +  | Sjp_0065450.1 | catalytic activity                            | 0.035844 |
| unknown     | NA     | NA       | NA       | SJC_S000817 | NA     | NA     | NA | Sjp_0065460.1 | catalytic activity                            | 0.035844 |
| unknown     | NA     | NA       | NA       | SJC_S000818 | NA     | NA     | NA | Sjp_0065470.1 | NA                                            | NA       |
| unknown     | NA     | NA       | NA       | SJC_S000818 | NA     | NA     | NA | Sjp_0065480.1 | NA                                            | NA       |
| unknown     | NA     | NA       | NA       | SJC_S000822 | NA     | NA     | NA | Sjp_0065500.1 | biological regulation                         | 0.76396  |
| HSB10kb_936 | 3      | 7094272  | 7107657  | SJC_S000823 | 27721  | 42160  | -  | Sjp_0065510.1 | response to stimulus                          | NA       |
| EBR10kb_440 | "3,3"  | NA       | NA       | SJC_S000823 | 42161  | 134366 | NA | Sjp_0065510.1 | response to                                   | NA       |

|             |       |          |          |             |        |        |    |               |                                               |          |
|-------------|-------|----------|----------|-------------|--------|--------|----|---------------|-----------------------------------------------|----------|
|             |       |          |          |             |        |        |    |               | stimulus                                      |          |
| EBR10kb_440 | "3,3" | NA       | NA       | SJC_S000823 | 42161  | 134366 | NA | Sjp_0065520.1 | NA                                            | NA       |
| EBR10kb_440 | "3,3" | NA       | NA       | SJC_S000823 | 42161  | 134366 | NA | Sjp_0065530.1 | NA                                            | NA       |
| EBR10kb_440 | "3,3" | NA       | NA       | SJC_S000823 | 42161  | 134366 | NA | Sjp_0065540.1 | enzyme regulator activity                     | 0.1755   |
| EBR10kb_440 | "3,3" | NA       | NA       | SJC_S000823 | 42161  | 134366 | NA | Sjp_0065550.1 | cellular process                              | 0.63852  |
| EBR10kb_440 | "3,3" | NA       | NA       | SJC_S000823 | 42161  | 134366 | NA | Sjp_0065560.1 | NA                                            | NA       |
| HSB10kb_937 | 3     | 6929597  | 6972691  | SJC_S000823 | 134367 | 186367 | -  | Sjp_0065570.1 | NA                                            | NA       |
| HSB10kb_937 | 3     | 6929597  | 6972691  | SJC_S000823 | 134367 | 186367 | -  | Sjp_0065580.1 | NA                                            | NA       |
| EBR10kb_441 | "3,2" | NA       | NA       | SJC_S000823 | 186368 | 205824 | NA | Sjp_0065580.1 | NA                                            | NA       |
| HSB10kb_938 | 2     | 3234958  | 3339619  | SJC_S000823 | 205825 | 257438 | +  | NA            | NA                                            | NA       |
| unknown     | NA    | NA       | NA       | SJC_S000823 | NA     | NA     | NA | Sjp_0065600.1 | NA                                            | NA       |
| HSB10kb_939 | 2     | 29450251 | 29485015 | SJC_S000824 | 76548  | 112195 | +  | Sjp_0065610.1 | cellular component organization or biogenesis | NA       |
| HSB10kb_939 | 2     | 29450251 | 29485015 | SJC_S000824 | 76548  | 112195 | +  | Sjp_0065620.1 | NA                                            | NA       |
| unknown     | NA    | NA       | NA       | SJC_S000824 | NA     | NA     | NA | Sjp_0065630.1 | cellular process                              | 0.63852  |
| unknown     | NA    | NA       | NA       | SJC_S000825 | NA     | NA     | NA | Sjp_0065640.1 | NA                                            | NA       |
| unknown     | NA    | NA       | NA       | SJC_S000825 | NA     | NA     | NA | Sjp_0065650.1 | NA                                            | NA       |
| unknown     | NA    | NA       | NA       | SJC_S000825 | NA     | NA     | NA | Sjp_0065660.1 | NA                                            | NA       |
| HSB10kb_940 | 4     | 4661581  | 4858097  | SJC_S000825 | 54451  | 193154 | +  | Sjp_0065670.1 | NA                                            | NA       |
| HSB10kb_940 | 4     | 4661581  | 4858097  | SJC_S000825 | 54451  | 193154 | +  | Sjp_0065680.1 | catalytic activity                            | 0.035844 |
| HSB10kb_940 | 4     | 4661581  | 4858097  | SJC_S000825 | 54451  | 193154 | +  | Sjp_0065690.1 | catalytic activity                            | 0.035844 |
| HSB10kb_940 | 4     | 4661581  | 4858097  | SJC_S000825 | 54451  | 193154 | +  | Sjp_0065700.1 | NA                                            | NA       |
| HSB10kb_940 | 4     | 4661581  | 4858097  | SJC_S000825 | 54451  | 193154 | +  | Sjp_0065710.1 | catalytic activity                            | 0.035844 |
| unknown     | NA    | NA       | NA       | SJC_S000825 | NA     | NA     | NA | Sjp_0065720.1 | NA                                            | NA       |
| HSB10kb_941 | WZ    | 5767014  | 5845516  | SJC_S000826 | 6054   | 78378  | +  | Sjp_0065730.1 | NA                                            | NA       |
| HSB10kb_941 | WZ    | 5767014  | 5845516  | SJC_S000826 | 6054   | 78378  | +  | Sjp_0065740.1 | NA                                            | NA       |
| HSB10kb_941 | WZ    | 5767014  | 5845516  | SJC_S000826 | 6054   | 78378  | +  | Sjp_0065750.1 | NA                                            | NA       |
| unknown     | NA    | NA       | NA       | SJC_S000826 | NA     | NA     | NA | Sjp_0065760.1 | catalytic activity                            | 0.035844 |
| unknown     | NA    | NA       | NA       | SJC_S000827 | NA     | NA     | NA | Sjp_0065770.1 | NA                                            | NA       |
| unknown     | NA    | NA       | NA       | SJC_S000827 | NA     | NA     | NA | Sjp_0065780.1 | NA                                            | NA       |

|             |       |          |          |             |        |        |    |               |                      |          |
|-------------|-------|----------|----------|-------------|--------|--------|----|---------------|----------------------|----------|
| unknown     | NA    | NA       | NA       | SJC_S000827 | NA     | NA     | NA | Sjp_0065790.1 | NA                   | NA       |
| unknown     | NA    | NA       | NA       | SJC_S000827 | NA     | NA     | NA | Sjp_0065800.1 | NA                   | NA       |
| unknown     | NA    | NA       | NA       | SJC_S000828 | NA     | NA     | NA | Sjp_0065810.1 | NA                   | NA       |
| unknown     | NA    | NA       | NA       | SJC_S000828 | NA     | NA     | NA | Sjp_0065820.1 | response to stimulus | NA       |
| unknown     | NA    | NA       | NA       | SJC_S000828 | NA     | NA     | NA | Sjp_0065840.1 | NA                   | NA       |
| unknown     | NA    | NA       | NA       | SJC_S000828 | NA     | NA     | NA | Sjp_0065850.1 | NA                   | NA       |
| unknown     | NA    | NA       | NA       | SJC_S000828 | NA     | NA     | NA | Sjp_0065860.1 | NA                   | NA       |
| HSB10kb_942 | 1     | 21577939 | 21606400 | SJC_S000829 | 42971  | 73122  | +  | Sjp_0065870.1 | NA                   | NA       |
| HSB10kb_942 | 1     | 21577939 | 21606400 | SJC_S000829 | 42971  | 73122  | +  | Sjp_0065880.1 | transporter activity | 0.782    |
| HSB10kb_942 | 1     | 21577939 | 21606400 | SJC_S000829 | 42971  | 73122  | +  | Sjp_0065890.1 | transporter activity | 0.782    |
| unknown     | NA    | NA       | NA       | SJC_S000830 | NA     | NA     | NA | Sjp_0065900.1 | binding              | 0.052762 |
| unknown     | NA    | NA       | NA       | SJC_S000830 | NA     | NA     | NA | Sjp_0065910.1 | binding              | 0.052762 |
| unknown     | NA    | NA       | NA       | SJC_S000831 | NA     | NA     | NA | Sjp_0065920.1 | catalytic activity   | 0.035844 |
| unknown     | NA    | NA       | NA       | SJC_S000831 | NA     | NA     | NA | Sjp_0065930.1 | NA                   | NA       |
| HSB10kb_943 | 2     | 18190043 | 18227000 | SJC_S000831 | 130409 | 163626 | -  | Sjp_0065940.1 | NA                   | NA       |
| HSB10kb_943 | 2     | 18190043 | 18227000 | SJC_S000831 | 130409 | 163626 | -  | Sjp_0065950.1 | NA                   | NA       |
| HSB10kb_943 | 2     | 18190043 | 18227000 | SJC_S000831 | 130409 | 163626 | -  | Sjp_0065960.1 | NA                   | NA       |
| HSB10kb_943 | 2     | 18190043 | 18227000 | SJC_S000831 | 130409 | 163626 | -  | Sjp_0065970.1 | catalytic activity   | 0.035844 |
| unknown     | NA    | NA       | NA       | SJC_S000832 | NA     | NA     | NA | Sjp_0065980.1 | NA                   | NA       |
| HSB10kb_944 | 1     | 54018592 | 54078499 | SJC_S000832 | 31712  | 78635  | +  | Sjp_0065990.1 | NA                   | NA       |
| HSB10kb_944 | 1     | 54018592 | 54078499 | SJC_S000832 | 31712  | 78635  | +  | Sjp_0066000.1 | NA                   | NA       |
| HSB10kb_944 | 1     | 54018592 | 54078499 | SJC_S000832 | 31712  | 78635  | +  | Sjp_0066010.1 | transporter activity | 0.782    |
| EBR10kb_442 | "1,1" | NA       | NA       | SJC_S000832 | 78636  | 101603 | NA | NA            | NA                   | NA       |
| HSB10kb_945 | 1     | 54091513 | 54108624 | SJC_S000832 | 101604 | 119286 | -  | Sjp_0066020.1 | metabolic process    | 0.41934  |
| EBR10kb_443 | "1,1" | NA       | NA       | SJC_S000832 | 119287 | 133243 | NA | NA            | NA                   | NA       |
| HSB10kb_946 | 1     | 54119519 | 54292480 | SJC_S000832 | 133244 | 290304 | +  | Sjp_0066030.1 | NA                   | NA       |
| HSB10kb_946 | 1     | 54119519 | 54292480 | SJC_S000832 | 133244 | 290304 | +  | Sjp_0066040.1 | cell part            | 0.009037 |
| HSB10kb_946 | 1     | 54119519 | 54292480 | SJC_S000832 | 133244 | 290304 | +  | Sjp_0066050.1 | binding              | 0.052762 |
| unknown     | NA    | NA       | NA       | SJC_S000832 | NA     | NA     | NA | Sjp_0066070.1 | catalytic activity   | 0.035844 |

|             |    |          |          |             |      |        |    |               |                                               |          |
|-------------|----|----------|----------|-------------|------|--------|----|---------------|-----------------------------------------------|----------|
| unknown     | NA | NA       | NA       | SJC_S000833 | NA   | NA     | NA | Sjp_0066080.1 | NA                                            | NA       |
| unknown     | NA | NA       | NA       | SJC_S000833 | NA   | NA     | NA | Sjp_0066090.1 | NA                                            | NA       |
| unknown     | NA | NA       | NA       | SJC_S000833 | NA   | NA     | NA | Sjp_0066100.1 | NA                                            | NA       |
| unknown     | NA | NA       | NA       | SJC_S000833 | NA   | NA     | NA | Sjp_0066110.1 | NA                                            | NA       |
| unknown     | NA | NA       | NA       | SJC_S000834 | NA   | NA     | NA | Sjp_0066120.1 | cell part                                     | 0.009037 |
| unknown     | NA | NA       | NA       | SJC_S000834 | NA   | NA     | NA | Sjp_0066130.1 | cellular component organization or biogenesis | NA       |
| unknown     | NA | NA       | NA       | SJC_S000834 | NA   | NA     | NA | Sjp_0066140.1 | cellular component organization or biogenesis | NA       |
| unknown     | NA | NA       | NA       | SJC_S000834 | NA   | NA     | NA | Sjp_0066150.1 | cellular component organization or biogenesis | NA       |
| unknown     | NA | NA       | NA       | SJC_S000834 | NA   | NA     | NA | Sjp_0066160.1 | NA                                            | NA       |
| HSB10kb_947 | 1  | 10846209 | 10967791 | SJC_S000835 | 7150 | 140454 | +  | Sjp_0066170.1 | binding                                       | 0.052762 |
| HSB10kb_947 | 1  | 10846209 | 10967791 | SJC_S000835 | 7150 | 140454 | +  | Sjp_0066180.1 | NA                                            | NA       |
| HSB10kb_947 | 1  | 10846209 | 10967791 | SJC_S000835 | 7150 | 140454 | +  | Sjp_0066190.1 | NA                                            | NA       |
| HSB10kb_947 | 1  | 10846209 | 10967791 | SJC_S000835 | 7150 | 140454 | +  | Sjp_0066200.1 | metabolic process                             | 0.41934  |
| HSB10kb_947 | 1  | 10846209 | 10967791 | SJC_S000835 | 7150 | 140454 | +  | Sjp_0066210.1 | NA                                            | NA       |
| HSB10kb_947 | 1  | 10846209 | 10967791 | SJC_S000835 | 7150 | 140454 | +  | Sjp_0066220.1 | NA                                            | NA       |
| unknown     | NA | NA       | NA       | SJC_S000835 | NA   | NA     | NA | Sjp_0066230.1 | NA                                            | NA       |
| unknown     | NA | NA       | NA       | SJC_S000836 | NA   | NA     | NA | Sjp_0066240.1 | NA                                            | NA       |
| unknown     | NA | NA       | NA       | SJC_S000836 | NA   | NA     | NA | Sjp_0066250.1 | establishment of localization                 | NA       |
| unknown     | NA | NA       | NA       | SJC_S000836 | NA   | NA     | NA | Sjp_0066260.1 | NA                                            | NA       |
| unknown     | NA | NA       | NA       | SJC_S000836 | NA   | NA     | NA | Sjp_0066270.1 | NA                                            | NA       |
| unknown     | NA | NA       | NA       | SJC_S000836 | NA   | NA     | NA | Sjp_0066280.1 | NA                                            | NA       |
| unknown     | NA | NA       | NA       | SJC_S000836 | NA   | NA     | NA | Sjp_0066290.1 | NA                                            | NA       |
| unknown     | NA | NA       | NA       | SJC_S000836 | NA   | NA     | NA | Sjp_0066300.1 | NA                                            | NA       |
| unknown     | NA | NA       | NA       | SJC_S000836 | NA   | NA     | NA | Sjp_0066310.1 | NA                                            | NA       |



|             |       |         |         |             |        |        |    |               |                       |          |
|-------------|-------|---------|---------|-------------|--------|--------|----|---------------|-----------------------|----------|
| unknown     | NA    | NA      | NA      | SJC_S000836 | NA     | NA     | NA | Sjp_0066320.1 | NA                    | NA       |
| unknown     | NA    | NA      | NA      | SJC_S000836 | NA     | NA     | NA | Sjp_0066330.1 | NA                    | NA       |
| unknown     | NA    | NA      | NA      | SJC_S000836 | NA     | NA     | NA | Sjp_0066340.1 | NA                    | NA       |
| unknown     | NA    | NA      | NA      | SJC_S000836 | NA     | NA     | NA | Sjp_0066350.1 | biological regulation | 0.76396  |
| unknown     | NA    | NA      | NA      | SJC_S000836 | NA     | NA     | NA | Sjp_0066360.1 | NA                    | NA       |
| unknown     | NA    | NA      | NA      | SJC_S000836 | NA     | NA     | NA | Sjp_0066370.1 | biological regulation | 0.76396  |
| unknown     | NA    | NA      | NA      | SJC_S000836 | NA     | NA     | NA | Sjp_0066380.1 | cell part             | 0.009037 |
| unknown     | NA    | NA      | NA      | SJC_S000836 | NA     | NA     | NA | Sjp_0066390.1 | NA                    | NA       |
| unknown     | NA    | NA      | NA      | SJC_S000836 | NA     | NA     | NA | Sjp_0066400.1 | NA                    | NA       |
| unknown     | NA    | NA      | NA      | SJC_S000836 | NA     | NA     | NA | Sjp_0066410.1 | NA                    | NA       |
| unknown     | NA    | NA      | NA      | SJC_S000837 | NA     | NA     | NA | Sjp_0066420.1 | NA                    | NA       |
| HSB10kb_948 | 4     | 9293000 | 9359359 | SJC_S000837 | 72125  | 131607 | -  | Sjp_0066430.1 | cell part             | 0.009037 |
| HSB10kb_948 | 4     | 9293000 | 9359359 | SJC_S000837 | 72125  | 131607 | -  | Sjp_0066440.1 | NA                    | NA       |
| HSB10kb_948 | 4     | 9293000 | 9359359 | SJC_S000837 | 72125  | 131607 | -  | Sjp_0066450.1 | NA                    | NA       |
| HSB10kb_948 | 4     | 9293000 | 9359359 | SJC_S000837 | 72125  | 131607 | -  | Sjp_0066460.1 | NA                    | NA       |
| HSB10kb_948 | 4     | 9293000 | 9359359 | SJC_S000837 | 72125  | 131607 | -  | Sjp_0066470.1 | NA                    | NA       |
| EBR10kb_444 | "4,4" | NA      | NA      | SJC_S000837 | 131608 | 136502 | NA | Sjp_0066470.1 | NA                    | NA       |
| HSB10kb_949 | 4     | 9102572 | 9128311 | SJC_S000837 | 136503 | 154801 | +  | Sjp_0066470.1 | NA                    | NA       |
| HSB10kb_949 | 4     | 9102572 | 9128311 | SJC_S000837 | 136503 | 154801 | +  | Sjp_0066480.1 | NA                    | NA       |
| unknown     | NA    | NA      | NA      | SJC_S000837 | NA     | NA     | NA | Sjp_0066490.1 | NA                    | NA       |
| unknown     | NA    | NA      | NA      | SJC_S000837 | NA     | NA     | NA | Sjp_0066500.1 | binding               | 0.052762 |
| unknown     | NA    | NA      | NA      | SJC_S000839 | NA     | NA     | NA | Sjp_0066510.1 | biological regulation | 0.76396  |
| unknown     | NA    | NA      | NA      | SJC_S000839 | NA     | NA     | NA | Sjp_0066520.1 | NA                    | NA       |
| unknown     | NA    | NA      | NA      | SJC_S000839 | NA     | NA     | NA | Sjp_0066530.1 | binding               | 0.052762 |
| unknown     | NA    | NA      | NA      | SJC_S000839 | NA     | NA     | NA | Sjp_0066540.1 | binding               | 0.052762 |
| unknown     | NA    | NA      | NA      | SJC_S000839 | NA     | NA     | NA | Sjp_0066550.1 | NA                    | NA       |
| unknown     | NA    | NA      | NA      | SJC_S000839 | NA     | NA     | NA | Sjp_0066560.1 | NA                    | NA       |
| unknown     | NA    | NA      | NA      | SJC_S000839 | NA     | NA     | NA | Sjp_0066570.1 | NA                    | NA       |
| unknown     | NA    | NA      | NA      | SJC_S000839 | NA     | NA     | NA | Sjp_0066580.1 | NA                    | NA       |
| unknown     | NA    | NA      | NA      | SJC_S000839 | NA     | NA     | NA | Sjp_0066590.1 | catalytic activity    | 0.035844 |
| unknown     | NA    | NA      | NA      | SJC_S000839 | NA     | NA     | NA | Sjp_0066600.1 | binding               | 0.052762 |

|             |       |          |          |             |        |        |    |               |                               |          |
|-------------|-------|----------|----------|-------------|--------|--------|----|---------------|-------------------------------|----------|
| unknown     | NA    | NA       | NA       | SJC_S000839 | NA     | NA     | NA | Sjp_0066610.1 | cell part                     | 0.009037 |
| HSB10kb_950 | 1     | 44638908 | 44894776 | SJC_S000840 | 18228  | 263267 | -  | Sjp_0066620.1 | NA                            | NA       |
| HSB10kb_950 | 1     | 44638908 | 44894776 | SJC_S000840 | 18228  | 263267 | -  | Sjp_0066630.1 | NA                            | NA       |
| HSB10kb_950 | 1     | 44638908 | 44894776 | SJC_S000840 | 18228  | 263267 | -  | Sjp_0066640.1 | NA                            | NA       |
| HSB10kb_950 | 1     | 44638908 | 44894776 | SJC_S000840 | 18228  | 263267 | -  | Sjp_0066650.1 | catalytic activity            | 0.035844 |
| HSB10kb_950 | 1     | 44638908 | 44894776 | SJC_S000840 | 18228  | 263267 | -  | Sjp_0066660.1 | NA                            | NA       |
| HSB10kb_950 | 1     | 44638908 | 44894776 | SJC_S000840 | 18228  | 263267 | -  | Sjp_0066670.1 | NA                            | NA       |
| HSB10kb_950 | 1     | 44638908 | 44894776 | SJC_S000840 | 18228  | 263267 | -  | Sjp_0066680.1 | NA                            | NA       |
| HSB10kb_950 | 1     | 44638908 | 44894776 | SJC_S000840 | 18228  | 263267 | -  | Sjp_0066690.1 | biological regulation         | 0.76396  |
| HSB10kb_951 | 6     | 1838781  | 1941484  | SJC_S000841 | 12034  | 47989  | +  | NA            | NA                            | NA       |
| EBR10kb_445 | "6,6" | NA       | NA       | SJC_S000841 | 47990  | 143104 | NA | Sjp_0066700.1 | catalytic activity            | 0.035844 |
| EBR10kb_445 | "6,6" | NA       | NA       | SJC_S000841 | 47990  | 143104 | NA | Sjp_0066710.1 | binding                       | 0.052762 |
| HSB10kb_952 | 6     | 2444114  | 2543899  | SJC_S000841 | 143105 | 209977 | -  | Sjp_0066710.1 | binding                       | 0.052762 |
| HSB10kb_952 | 6     | 2444114  | 2543899  | SJC_S000841 | 143105 | 209977 | -  | Sjp_0066730.1 | NA                            | NA       |
| HSB10kb_952 | 6     | 2444114  | 2543899  | SJC_S000841 | 143105 | 209977 | -  | Sjp_0066740.1 | NA                            | NA       |
| HSB10kb_952 | 6     | 2444114  | 2543899  | SJC_S000841 | 143105 | 209977 | -  | Sjp_0066750.1 | biological regulation         | 0.76396  |
| unknown     | NA    | NA       | NA       | SJC_S000841 | NA     | NA     | NA | Sjp_0066760.1 | NA                            | NA       |
| HSB10kb_953 | WZ    | 10090547 | 10355663 | SJC_S000842 | 15503  | 230232 | +  | Sjp_0066770.1 | catalytic activity            | 0.035844 |
| HSB10kb_953 | WZ    | 10090547 | 10355663 | SJC_S000842 | 15503  | 230232 | +  | Sjp_0066780.1 | NA                            | NA       |
| HSB10kb_953 | WZ    | 10090547 | 10355663 | SJC_S000842 | 15503  | 230232 | +  | Sjp_0066790.1 | cell part                     | 0.009037 |
| HSB10kb_953 | WZ    | 10090547 | 10355663 | SJC_S000842 | 15503  | 230232 | +  | Sjp_0066800.1 | metabolic process             | 0.41934  |
| HSB10kb_953 | WZ    | 10090547 | 10355663 | SJC_S000842 | 15503  | 230232 | +  | Sjp_0066810.1 | molecular transducer activity | 0.50162  |
| HSB10kb_953 | WZ    | 10090547 | 10355663 | SJC_S000842 | 15503  | 230232 | +  | Sjp_0066820.1 | binding                       | 0.052762 |
| HSB10kb_953 | WZ    | 10090547 | 10355663 | SJC_S000842 | 15503  | 230232 | +  | Sjp_0066840.1 | NA                            | NA       |
| HSB10kb_953 | WZ    | 10090547 | 10355663 | SJC_S000842 | 15503  | 230232 | +  | Sjp_0066850.1 | NA                            | NA       |
| unknown     | NA    | NA       | NA       | SJC_S000843 | NA     | NA     | NA | Sjp_0066860.1 | response to stimulus          | NA       |
| unknown     | NA    | NA       | NA       | SJC_S000844 | NA     | NA     | NA | Sjp_0066870.1 | NA                            | NA       |
| unknown     | NA    | NA       | NA       | SJC_S000844 | NA     | NA     | NA | Sjp_0066880.1 | NA                            | NA       |

|             |         |          |          |             |       |        |    |               |                               |          |
|-------------|---------|----------|----------|-------------|-------|--------|----|---------------|-------------------------------|----------|
| unknown     | NA      | NA       | NA       | SJC_S000844 | NA    | NA     | NA | Sjp_0066890.1 | NA                            | NA       |
| HSB10kb_954 | WZ      | 34864053 | 34903115 | SJC_S000845 | 8960  | 49767  | -  | NA            | NA                            | NA       |
| EBR10kb_446 | "WZ,WZ" | NA       | NA       | SJC_S000845 | 49768 | 94098  | NA | NA            | NA                            | NA       |
| HSB10kb_955 | WZ      | 34748229 | 34810365 | SJC_S000845 | 94099 | 155579 | -  | Sjp_0066910.1 | catalytic activity            | 0.035844 |
| HSB10kb_955 | WZ      | 34748229 | 34810365 | SJC_S000845 | 94099 | 155579 | -  | Sjp_0066920.1 | metabolic process             | 0.41934  |
| HSB10kb_956 | WZ      | 43410658 | 43517811 | SJC_S000846 | 20989 | 142688 | +  | Sjp_0066930.1 | NA                            | NA       |
| HSB10kb_956 | WZ      | 43410658 | 43517811 | SJC_S000846 | 20989 | 142688 | +  | Sjp_0066940.1 | binding                       | 0.052762 |
| HSB10kb_956 | WZ      | 43410658 | 43517811 | SJC_S000846 | 20989 | 142688 | +  | Sjp_0066950.1 | binding                       | 0.052762 |
| HSB10kb_957 | 2       | 6697996  | 6763317  | SJC_S000847 | 521   | 53773  | +  | Sjp_0066960.1 | NA                            | NA       |
| HSB10kb_957 | 2       | 6697996  | 6763317  | SJC_S000847 | 521   | 53773  | +  | Sjp_0066970.1 | NA                            | NA       |
| EBR10kb_447 | "2,2"   | NA       | NA       | SJC_S000847 | 53774 | 78288  | NA | Sjp_0066970.1 | NA                            | NA       |
| EBR10kb_447 | "2,2"   | NA       | NA       | SJC_S000847 | 53774 | 78288  | NA | Sjp_0066980.1 | molecular transducer activity | 0.50162  |
| HSB10kb_958 | 2       | 6881359  | 7058694  | SJC_S000847 | 78289 | 155073 | +  | Sjp_0066980.1 | molecular transducer activity | 0.50162  |
| HSB10kb_958 | 2       | 6881359  | 7058694  | SJC_S000847 | 78289 | 155073 | +  | Sjp_0066990.1 | NA                            | NA       |
| unknown     | NA      | NA       | NA       | SJC_S000847 | NA    | NA     | NA | Sjp_0067000.1 | NA                            | NA       |
| HSB10kb_959 | 3       | 23693112 | 23738194 | SJC_S000848 | 11316 | 51554  | -  | Sjp_0067010.1 | NA                            | NA       |
| HSB10kb_959 | 3       | 23693112 | 23738194 | SJC_S000848 | 11316 | 51554  | -  | Sjp_0067020.1 | NA                            | NA       |
| unknown     | NA      | NA       | NA       | SJC_S000848 | NA    | NA     | NA | Sjp_0067030.1 | NA                            | NA       |
| unknown     | NA      | NA       | NA       | SJC_S000849 | NA    | NA     | NA | Sjp_0067040.1 | NA                            | NA       |
| unknown     | NA      | NA       | NA       | SJC_S000849 | NA    | NA     | NA | Sjp_0067050.1 | NA                            | NA       |
| unknown     | NA      | NA       | NA       | SJC_S000849 | NA    | NA     | NA | Sjp_0067060.1 | binding                       | 0.052762 |
| unknown     | NA      | NA       | NA       | SJC_S000849 | NA    | NA     | NA | Sjp_0067070.1 | NA                            | NA       |
| unknown     | NA      | NA       | NA       | SJC_S000850 | NA    | NA     | NA | Sjp_0067080.1 | NA                            | NA       |
| unknown     | NA      | NA       | NA       | SJC_S000850 | NA    | NA     | NA | Sjp_0067090.1 | NA                            | NA       |
| unknown     | NA      | NA       | NA       | SJC_S000851 | NA    | NA     | NA | Sjp_0067100.1 | cell part                     | 0.009037 |
| unknown     | NA      | NA       | NA       | SJC_S000851 | NA    | NA     | NA | Sjp_0067110.1 | NA                            | NA       |
| HSB10kb_960 | 1       | 62131268 | 62149307 | SJC_S000851 | 36957 | 59864  | +  | Sjp_0067120.1 | NA                            | NA       |
| HSB10kb_960 | 1       | 62131268 | 62149307 | SJC_S000851 | 36957 | 59864  | +  | Sjp_0067130.1 | cellular process              | 0.63852  |
| unknown     | NA      | NA       | NA       | SJC_S000852 | NA    | NA     | NA | Sjp_0067140.1 | NA                            | NA       |

|             |    |          |          |             |       |       |    |               |                                               |          |
|-------------|----|----------|----------|-------------|-------|-------|----|---------------|-----------------------------------------------|----------|
| unknown     | NA | NA       | NA       | SJC_S000852 | NA    | NA    | NA | Sjp_0067150.1 | NA                                            | NA       |
| unknown     | NA | NA       | NA       | SJC_S000853 | NA    | NA    | NA | Sjp_0067160.1 | NA                                            | NA       |
| unknown     | NA | NA       | NA       | SJC_S000853 | NA    | NA    | NA | Sjp_0067170.1 | NA                                            | NA       |
| unknown     | NA | NA       | NA       | SJC_S000853 | NA    | NA    | NA | Sjp_0067180.1 | NA                                            | NA       |
| unknown     | NA | NA       | NA       | SJC_S000854 | NA    | NA    | NA | Sjp_0067190.1 | NA                                            | NA       |
| unknown     | NA | NA       | NA       | SJC_S000855 | NA    | NA    | NA | Sjp_0067200.1 | NA                                            | NA       |
| unknown     | NA | NA       | NA       | SJC_S000855 | NA    | NA    | NA | Sjp_0067210.1 | catalytic activity                            | 0.035844 |
| unknown     | NA | NA       | NA       | SJC_S000855 | NA    | NA    | NA | Sjp_0067220.1 | transporter activity                          | 0.782    |
| HSB10kb_961 | 2  | 14359755 | 14407894 | SJC_S000856 | 2857  | 47461 | -  | Sjp_0067230.1 | metabolic process                             | 0.41934  |
| HSB10kb_961 | 2  | 14359755 | 14407894 | SJC_S000856 | 2857  | 47461 | -  | Sjp_0067240.1 | cell part                                     | 0.009037 |
| unknown     | NA | NA       | NA       | SJC_S000856 | NA    | NA    | NA | Sjp_0067250.1 | NA                                            | NA       |
| unknown     | NA | NA       | NA       | SJC_S000857 | NA    | NA    | NA | Sjp_0067260.1 | NA                                            | NA       |
| unknown     | NA | NA       | NA       | SJC_S000858 | NA    | NA    | NA | Sjp_0067270.1 | response to stimulus                          | NA       |
| unknown     | NA | NA       | NA       | SJC_S000858 | NA    | NA    | NA | Sjp_0067280.1 | cell part                                     | 0.009037 |
| unknown     | NA | NA       | NA       | SJC_S000858 | NA    | NA    | NA | Sjp_0067290.1 | NA                                            | NA       |
| unknown     | NA | NA       | NA       | SJC_S000859 | NA    | NA    | NA | Sjp_0067300.1 | binding                                       | 0.052762 |
| unknown     | NA | NA       | NA       | SJC_S000859 | NA    | NA    | NA | Sjp_0067310.1 | NA                                            | NA       |
| unknown     | NA | NA       | NA       | SJC_S000860 | NA    | NA    | NA | Sjp_0067320.1 | NA                                            | NA       |
| unknown     | NA | NA       | NA       | SJC_S000861 | NA    | NA    | NA | Sjp_0067330.1 | NA                                            | NA       |
| unknown     | NA | NA       | NA       | SJC_S000861 | NA    | NA    | NA | Sjp_0067340.1 | NA                                            | NA       |
| unknown     | NA | NA       | NA       | SJC_S000862 | NA    | NA    | NA | Sjp_0067350.1 | NA                                            | NA       |
| HSB10kb_962 | 6  | 13596869 | 13611008 | SJC_S000863 | 14142 | 33546 | +  | Sjp_0067360.1 | catalytic activity                            | 0.035844 |
| unknown     | NA | NA       | NA       | SJC_S000863 | NA    | NA    | NA | Sjp_0067370.1 | NA                                            | NA       |
| unknown     | NA | NA       | NA       | SJC_S000864 | NA    | NA    | NA | Sjp_0067380.1 | catalytic activity                            | 0.035844 |
| unknown     | NA | NA       | NA       | SJC_S000864 | NA    | NA    | NA | Sjp_0067390.1 | NA                                            | NA       |
| unknown     | NA | NA       | NA       | SJC_S000865 | NA    | NA    | NA | Sjp_0067400.1 | NA                                            | NA       |
| unknown     | NA | NA       | NA       | SJC_S000865 | NA    | NA    | NA | Sjp_0067410.1 | catalytic activity                            | 0.035844 |
| HSB10kb_963 | 7  | 7357593  | 7384659  | SJC_S000866 | 5648  | 23356 | +  | Sjp_0067420.1 | protein binding transcription factor activity | NA       |
| HSB10kb_963 | 7  | 7357593  | 7384659  | SJC_S000866 | 5648  | 23356 | +  | Sjp_0067430.1 | NA                                            | NA       |

|             |    |          |          |             |       |       |    |               |                                               |          |
|-------------|----|----------|----------|-------------|-------|-------|----|---------------|-----------------------------------------------|----------|
| HSB10kb_964 | 1  | 15305522 | 15322663 | SJC_S000867 | 17506 | 42228 | -  | Sjp_0067450.1 | binding                                       | 0.052762 |
| unknown     | NA | NA       | NA       | SJC_S000868 | NA    | NA    | NA | Sjp_0067460.1 | NA                                            | NA       |
| unknown     | NA | NA       | NA       | SJC_S000868 | NA    | NA    | NA | Sjp_0067470.1 | catalytic activity                            | 0.035844 |
| unknown     | NA | NA       | NA       | SJC_S000868 | NA    | NA    | NA | Sjp_0067480.1 | cellular component organization or biogenesis | NA       |
| unknown     | NA | NA       | NA       | SJC_S000869 | NA    | NA    | NA | Sjp_0067490.1 | cellular process                              | 0.63852  |
| unknown     | NA | NA       | NA       | SJC_S000869 | NA    | NA    | NA | Sjp_0067500.1 | cellular process                              | 0.63852  |
| unknown     | NA | NA       | NA       | SJC_S000871 | NA    | NA    | NA | Sjp_0067510.1 | NA                                            | NA       |
| unknown     | NA | NA       | NA       | SJC_S000871 | NA    | NA    | NA | Sjp_0067520.1 | catalytic activity                            | 0.035844 |
| unknown     | NA | NA       | NA       | SJC_S000871 | NA    | NA    | NA | Sjp_0067530.1 | NA                                            | NA       |
| unknown     | NA | NA       | NA       | SJC_S000871 | NA    | NA    | NA | Sjp_0067540.1 | catalytic activity                            | 0.035844 |
| unknown     | NA | NA       | NA       | SJC_S000872 | NA    | NA    | NA | Sjp_0067550.1 | NA                                            | NA       |
| HSB10kb_965 | 3  | 5248066  | 5268293  | SJC_S000873 | 1549  | 22969 | -  | Sjp_0067560.1 | cellular component organization or biogenesis | NA       |
| HSB10kb_965 | 3  | 5248066  | 5268293  | SJC_S000873 | 1549  | 22969 | -  | Sjp_0067570.1 | NA                                            | NA       |
| HSB10kb_965 | 3  | 5248066  | 5268293  | SJC_S000873 | 1549  | 22969 | -  | Sjp_0067580.1 | cell part                                     | 0.009037 |
| unknown     | NA | NA       | NA       | SJC_S000874 | NA    | NA    | NA | Sjp_0067590.1 | NA                                            | NA       |
| unknown     | NA | NA       | NA       | SJC_S000875 | NA    | NA    | NA | Sjp_0067600.1 | NA                                            | NA       |
| unknown     | NA | NA       | NA       | SJC_S000875 | NA    | NA    | NA | Sjp_0067610.1 | NA                                            | NA       |
| unknown     | NA | NA       | NA       | SJC_S000876 | NA    | NA    | NA | Sjp_0067620.1 | NA                                            | NA       |
| unknown     | NA | NA       | NA       | SJC_S000877 | NA    | NA    | NA | Sjp_0067630.1 | binding                                       | 0.052762 |
| unknown     | NA | NA       | NA       | SJC_S000877 | NA    | NA    | NA | Sjp_0067640.1 | metabolic process                             | 0.41934  |
| unknown     | NA | NA       | NA       | SJC_S000878 | NA    | NA    | NA | Sjp_0067660.1 | biological regulation                         | 0.76396  |
| unknown     | NA | NA       | NA       | SJC_S000879 | NA    | NA    | NA | Sjp_0067670.1 | NA                                            | NA       |
| HSB10kb_966 | WZ | 24704770 | 24722715 | SJC_S000879 | 17155 | 34497 | +  | Sjp_0067680.1 | NA                                            | NA       |
| HSB10kb_966 | WZ | 24704770 | 24722715 | SJC_S000879 | 17155 | 34497 | +  | Sjp_0067690.1 | NA                                            | NA       |
| HSB10kb_967 | WZ | 19471739 | 19509781 | SJC_S000880 | 86    | 29292 | +  | Sjp_0067700.1 | catalytic activity                            | 0.035844 |
| unknown     | NA | NA       | NA       | SJC_S000880 | NA    | NA    | NA | Sjp_0067710.1 | NA                                            | NA       |

|             |    |          |          |             |       |        |    |               |                                               |          |
|-------------|----|----------|----------|-------------|-------|--------|----|---------------|-----------------------------------------------|----------|
| HSB10kb_968 | 6  | 15410759 | 15422137 | SJC_S000881 | 3131  | 13403  |    | Sjp_0067720.1 | NA                                            | NA       |
| unknown     | NA | NA       | NA       | SJC_S000881 | NA    | NA     | NA | Sjp_0067730.1 | NA                                            | NA       |
| unknown     | NA | NA       | NA       | SJC_S000883 | NA    | NA     | NA | Sjp_0067740.1 | NA                                            | NA       |
| unknown     | NA | NA       | NA       | SJC_S000886 | NA    | NA     | NA | Sjp_0067750.1 | NA                                            | NA       |
| unknown     | NA | NA       | NA       | SJC_S000886 | NA    | NA     | NA | Sjp_0067760.1 | cell part                                     | 0.009037 |
| unknown     | NA | NA       | NA       | SJC_S000886 | NA    | NA     | NA | Sjp_0067770.1 | cellular component organization or biogenesis | NA       |
| HSB10kb_969 | WZ | 28573818 | 28589424 | SJC_S000887 | 1478  | 13527  | +  | Sjp_0067780.1 | NA                                            | NA       |
| unknown     | NA | NA       | NA       | SJC_S000888 | NA    | NA     | NA | Sjp_0067790.1 | cellular process                              | 0.63852  |
| unknown     | NA | NA       | NA       | SJC_S000889 | NA    | NA     | NA | Sjp_0067800.1 | NA                                            | NA       |
| HSB10kb_970 | WZ | 16420052 | 16437675 | SJC_S000890 | 15134 | 32502  | -  | Sjp_0067810.1 | NA                                            | NA       |
| HSB10kb_970 | WZ | 16420052 | 16437675 | SJC_S000890 | 15134 | 32502  | -  | Sjp_0067820.1 | NA                                            | NA       |
| HSB10kb_971 | WZ | 29651073 | 29668795 | SJC_S000891 | 35762 | 49066  | +  | Sjp_0067830.1 | NA                                            | NA       |
| HSB10kb_971 | WZ | 29651073 | 29668795 | SJC_S000891 | 35762 | 49066  | +  | Sjp_0067840.1 | NA                                            | NA       |
| unknown     | NA | NA       | NA       | SJC_S000892 | NA    | NA     | NA | Sjp_0067850.1 | cell part                                     | 0.009037 |
| unknown     | NA | NA       | NA       | SJC_S000893 | NA    | NA     | NA | Sjp_0067860.1 | NA                                            | NA       |
| unknown     | NA | NA       | NA       | SJC_S000893 | NA    | NA     | NA | Sjp_0067870.1 | response to stimulus                          | NA       |
| unknown     | NA | NA       | NA       | SJC_S000894 | NA    | NA     | NA | Sjp_0067880.1 | biological regulation                         | 0.76396  |
| unknown     | NA | NA       | NA       | SJC_S000895 | NA    | NA     | NA | Sjp_0067890.1 | NA                                            | NA       |
| unknown     | NA | NA       | NA       | SJC_S000897 | NA    | NA     | NA | Sjp_0067900.1 | binding                                       | 0.052762 |
| unknown     | NA | NA       | NA       | SJC_S000898 | NA    | NA     | NA | Sjp_0067910.1 | binding                                       | 0.052762 |
| HSB10kb_972 | 6  | 15903713 | 16073103 | SJC_S000899 | 58729 | 205179 | +  | Sjp_0067930.1 | NA                                            | NA       |
| HSB10kb_972 | 6  | 15903713 | 16073103 | SJC_S000899 | 58729 | 205179 | +  | Sjp_0067940.1 | NA                                            | NA       |
| HSB10kb_972 | 6  | 15903713 | 16073103 | SJC_S000899 | 58729 | 205179 | +  | Sjp_0067950.1 | NA                                            | NA       |
| HSB10kb_972 | 6  | 15903713 | 16073103 | SJC_S000899 | 58729 | 205179 | +  | Sjp_0067960.1 | NA                                            | NA       |
| unknown     | NA | NA       | NA       | SJC_S000900 | NA    | NA     | NA | Sjp_0067970.1 | NA                                            | NA       |
| unknown     | NA | NA       | NA       | SJC_S000900 | NA    | NA     | NA | Sjp_0067980.1 | NA                                            | NA       |
| unknown     | NA | NA       | NA       | SJC_S000900 | NA    | NA     | NA | Sjp_0067990.1 | biological regulation                         | 0.76396  |
| unknown     | NA | NA       | NA       | SJC_S000900 | NA    | NA     | NA | Sjp_0068000.1 | cell part                                     | 0.009037 |

|             |       |          |          |             |        |        |    |               |                       |          |
|-------------|-------|----------|----------|-------------|--------|--------|----|---------------|-----------------------|----------|
| unknown     | NA    | NA       | NA       | SJC_S000900 | NA     | NA     | NA | Sjp_0068010.1 | NA                    | NA       |
| unknown     | NA    | NA       | NA       | SJC_S000900 | NA     | NA     | NA | Sjp_0068020.1 | NA                    | NA       |
| unknown     | NA    | NA       | NA       | SJC_S000900 | NA     | NA     | NA | Sjp_0068030.1 | NA                    | NA       |
| unknown     | NA    | NA       | NA       | SJC_S000900 | NA     | NA     | NA | Sjp_0068040.1 | NA                    | NA       |
| unknown     | NA    | NA       | NA       | SJC_S000901 | NA     | NA     | NA | Sjp_0068050.1 | NA                    | NA       |
| unknown     | NA    | NA       | NA       | SJC_S000901 | NA     | NA     | NA | Sjp_0068060.1 | NA                    | NA       |
| HSB10kb_973 | 3     | 10473260 | 10540680 | SJC_S000902 | 22766  | 106236 | -  | Sjp_0068070.1 | binding               | 0.052762 |
| HSB10kb_973 | 3     | 10473260 | 10540680 | SJC_S000902 | 22766  | 106236 | -  | Sjp_0068080.1 | NA                    | NA       |
| HSB10kb_973 | 3     | 10473260 | 10540680 | SJC_S000902 | 22766  | 106236 | -  | Sjp_0068090.1 | catalytic activity    | 0.035844 |
| EBR10kb_448 | "3,3" | NA       | NA       | SJC_S000902 | 106237 | 120897 | NA | Sjp_0068100.1 | catalytic activity    | 0.035844 |
| HSB10kb_974 | 3     | 10564266 | 10580160 | SJC_S000902 | 120898 | 146803 |    | NA            | NA                    | NA       |
| HSB10kb_975 | 1     | 36316450 | 36598913 | SJC_S000903 | 42246  | 285825 | -  | Sjp_0068110.1 | NA                    | NA       |
| HSB10kb_975 | 1     | 36316450 | 36598913 | SJC_S000903 | 42246  | 285825 | -  | Sjp_0068120.1 | NA                    | NA       |
| HSB10kb_975 | 1     | 36316450 | 36598913 | SJC_S000903 | 42246  | 285825 | -  | Sjp_0068130.1 | NA                    | NA       |
| HSB10kb_975 | 1     | 36316450 | 36598913 | SJC_S000903 | 42246  | 285825 | -  | Sjp_0068140.1 | NA                    | NA       |
| HSB10kb_975 | 1     | 36316450 | 36598913 | SJC_S000903 | 42246  | 285825 | -  | Sjp_0068150.1 | NA                    | NA       |
| HSB10kb_975 | 1     | 36316450 | 36598913 | SJC_S000903 | 42246  | 285825 | -  | Sjp_0068160.1 | NA                    | NA       |
| HSB10kb_975 | 1     | 36316450 | 36598913 | SJC_S000903 | 42246  | 285825 | -  | Sjp_0068170.1 | cellular process      | 0.63852  |
| HSB10kb_975 | 1     | 36316450 | 36598913 | SJC_S000903 | 42246  | 285825 | -  | Sjp_0068180.1 | NA                    | NA       |
| unknown     | NA    | NA       | NA       | SJC_S000904 | NA     | NA     | NA | Sjp_0068190.1 | transporter activity  | 0.782    |
| unknown     | NA    | NA       | NA       | SJC_S000904 | NA     | NA     | NA | Sjp_0068200.1 | transporter activity  | 0.782    |
| unknown     | NA    | NA       | NA       | SJC_S000905 | NA     | NA     | NA | Sjp_0068210.1 | response to stimulus  | NA       |
| unknown     | NA    | NA       | NA       | SJC_S000905 | NA     | NA     | NA | Sjp_0068220.1 | NA                    | NA       |
| unknown     | NA    | NA       | NA       | SJC_S000905 | NA     | NA     | NA | Sjp_0068230.1 | biological regulation | 0.76396  |
| unknown     | NA    | NA       | NA       | SJC_S000905 | NA     | NA     | NA | Sjp_0068240.1 | transporter activity  | 0.782    |
| unknown     | NA    | NA       | NA       | SJC_S000905 | NA     | NA     | NA | Sjp_0068250.1 | transporter activity  | 0.782    |
| unknown     | NA    | NA       | NA       | SJC_S000906 | NA     | NA     | NA | Sjp_0068260.1 | transporter activity  | 0.782    |

|             |       |          |          |             |        |        |    |               |                                               |          |
|-------------|-------|----------|----------|-------------|--------|--------|----|---------------|-----------------------------------------------|----------|
| unknown     | NA    | NA       | NA       | SJC_S000906 | NA     | NA     | NA | Sjp_0068270.1 | NA                                            | NA       |
| unknown     | NA    | NA       | NA       | SJC_S000906 | NA     | NA     | NA | Sjp_0068280.1 | biological regulation                         | 0.76396  |
| unknown     | NA    | NA       | NA       | SJC_S000906 | NA     | NA     | NA | Sjp_0068290.1 | transporter activity                          | 0.782    |
| unknown     | NA    | NA       | NA       | SJC_S000907 | NA     | NA     | NA | Sjp_0068300.1 | NA                                            | NA       |
| unknown     | NA    | NA       | NA       | SJC_S000907 | NA     | NA     | NA | Sjp_0068310.1 | NA                                            | NA       |
| unknown     | NA    | NA       | NA       | SJC_S000907 | NA     | NA     | NA | Sjp_0068320.1 | NA                                            | NA       |
| HSB10kb_976 | 1     | 18742900 | 18769516 | SJC_S000908 | 22520  | 34672  | +  | Sjp_0068340.1 | catalytic activity                            | 0.035844 |
| EBR10kb_449 | "1,1" | NA       | NA       | SJC_S000908 | 34673  | 54612  | NA | Sjp_0068350.1 | NA                                            | NA       |
| HSB10kb_977 | 1     | 18720287 | 18736357 | SJC_S000908 | 54613  | 86804  | +  | Sjp_0068350.1 | NA                                            | NA       |
| HSB10kb_977 | 1     | 18720287 | 18736357 | SJC_S000908 | 54613  | 86804  | +  | Sjp_0068360.1 | NA                                            | NA       |
| EBR10kb_450 | "1,1" | NA       | NA       | SJC_S000908 | 86805  | 109463 | NA | Sjp_0068370.1 | cellular component organization or biogenesis | NA       |
| EBR10kb_450 | "1,1" | NA       | NA       | SJC_S000908 | 86805  | 109463 | NA | Sjp_0068380.1 | catalytic activity                            | 0.035844 |
| HSB10kb_978 | 1     | 18787027 | 18798307 | SJC_S000908 | 109464 | 125675 | -  | Sjp_0068380.1 | catalytic activity                            | 0.035844 |
| unknown     | NA    | NA       | NA       | SJC_S000908 | NA     | NA     | NA | Sjp_0068390.1 | NA                                            | NA       |
| unknown     | NA    | NA       | NA       | SJC_S000908 | NA     | NA     | NA | Sjp_0068400.1 | NA                                            | NA       |
| unknown     | NA    | NA       | NA       | SJC_S000909 | NA     | NA     | NA | Sjp_0068410.1 | NA                                            | NA       |
| unknown     | NA    | NA       | NA       | SJC_S000909 | NA     | NA     | NA | Sjp_0068420.1 | NA                                            | NA       |
| unknown     | NA    | NA       | NA       | SJC_S000909 | NA     | NA     | NA | Sjp_0068430.1 | NA                                            | NA       |
| unknown     | NA    | NA       | NA       | SJC_S000909 | NA     | NA     | NA | Sjp_0068440.1 | NA                                            | NA       |
| unknown     | NA    | NA       | NA       | SJC_S000910 | NA     | NA     | NA | Sjp_0068450.1 | NA                                            | NA       |
| unknown     | NA    | NA       | NA       | SJC_S000910 | NA     | NA     | NA | Sjp_0068460.1 | catalytic activity                            | 0.035844 |
| unknown     | NA    | NA       | NA       | SJC_S000910 | NA     | NA     | NA | Sjp_0068470.1 | catalytic activity                            | 0.035844 |
| HSB10kb_979 | 7     | 7781420  | 7797621  | SJC_S000911 | 45638  | 64237  | -  | Sjp_0068480.1 | cell part                                     | 0.009037 |
| HSB10kb_979 | 7     | 7781420  | 7797621  | SJC_S000911 | 45638  | 64237  | -  | Sjp_0068490.1 | NA                                            | NA       |
| unknown     | NA    | NA       | NA       | SJC_S000911 | NA     | NA     | NA | Sjp_0068500.1 | NA                                            | NA       |
| unknown     | NA    | NA       | NA       | SJC_S000912 | NA     | NA     | NA | Sjp_0068510.1 | NA                                            | NA       |
| HSB10kb_980 | 6     | 4322372  | 4348179  | SJC_S000912 | 40025  | 69167  | +  | Sjp_0068520.1 | biological regulation                         | 0.76396  |
| unknown     | NA    | NA       | NA       | SJC_S000913 | NA     | NA     | NA | Sjp_0068530.1 | establishment                                 | NA       |



|             |    |          |          |             |       |        |    |               |                       |          |
|-------------|----|----------|----------|-------------|-------|--------|----|---------------|-----------------------|----------|
|             |    |          |          |             |       |        |    |               | of localization       |          |
| unknown     | NA | NA       | NA       | SJC_S000914 | NA    | NA     | NA | Sjp_0068550.1 | catalytic activity    | 0.035844 |
| unknown     | NA | NA       | NA       | SJC_S000914 | NA    | NA     | NA | Sjp_0068560.1 | metabolic process     | 0.41934  |
| unknown     | NA | NA       | NA       | SJC_S000914 | NA    | NA     | NA | Sjp_0068570.1 | NA                    | NA       |
| unknown     | NA | NA       | NA       | SJC_S000914 | NA    | NA     | NA | Sjp_0068580.1 | cellular process      | 0.63852  |
| unknown     | NA | NA       | NA       | SJC_S000914 | NA    | NA     | NA | Sjp_0068590.1 | response to stimulus  | NA       |
| HSB10kb_981 | 1  | 19354879 | 19572289 | SJC_S000915 | 18891 | 229762 | +  | Sjp_0068600.1 | NA                    | NA       |
| HSB10kb_981 | 1  | 19354879 | 19572289 | SJC_S000915 | 18891 | 229762 | +  | Sjp_0068610.1 | NA                    | NA       |
| HSB10kb_981 | 1  | 19354879 | 19572289 | SJC_S000915 | 18891 | 229762 | +  | Sjp_0068620.1 | NA                    | NA       |
| HSB10kb_981 | 1  | 19354879 | 19572289 | SJC_S000915 | 18891 | 229762 | +  | Sjp_0068640.1 | NA                    | NA       |
| HSB10kb_981 | 1  | 19354879 | 19572289 | SJC_S000915 | 18891 | 229762 | +  | Sjp_0068650.1 | NA                    | NA       |
| HSB10kb_981 | 1  | 19354879 | 19572289 | SJC_S000915 | 18891 | 229762 | +  | Sjp_0068660.1 | NA                    | NA       |
| unknown     | NA | NA       | NA       | SJC_S000916 | NA    | NA     | NA | Sjp_0068670.1 | biological regulation | 0.76396  |
| unknown     | NA | NA       | NA       | SJC_S000917 | NA    | NA     | NA | Sjp_0068680.1 | NA                    | NA       |
| unknown     | NA | NA       | NA       | SJC_S000917 | NA    | NA     | NA | Sjp_0068690.1 | NA                    | NA       |
| unknown     | NA | NA       | NA       | SJC_S000918 | NA    | NA     | NA | Sjp_0068700.1 | catalytic activity    | 0.035844 |
| HSB10kb_982 | 6  | 113339   | 167935   | SJC_S000918 | 31056 | 69804  | -  | Sjp_0068710.1 | NA                    | NA       |
| HSB10kb_982 | 6  | 113339   | 167935   | SJC_S000918 | 31056 | 69804  | -  | Sjp_0068720.1 | NA                    | NA       |
| HSB10kb_983 | 4  | 8041519  | 8069787  | SJC_S000919 | 15527 | 47178  | +  | Sjp_0068730.1 | cell part             | 0.009037 |
| HSB10kb_983 | 4  | 8041519  | 8069787  | SJC_S000919 | 15527 | 47178  | +  | Sjp_0068740.1 | catalytic activity    | 0.035844 |
| unknown     | NA | NA       | NA       | SJC_S000919 | NA    | NA     | NA | Sjp_0068750.1 | binding               | 0.052762 |
| unknown     | NA | NA       | NA       | SJC_S000920 | NA    | NA     | NA | Sjp_0068760.1 | NA                    | NA       |
| unknown     | NA | NA       | NA       | SJC_S000920 | NA    | NA     | NA | Sjp_0068770.1 | NA                    | NA       |
| unknown     | NA | NA       | NA       | SJC_S000920 | NA    | NA     | NA | Sjp_0068780.1 | NA                    | NA       |
| HSB10kb_984 | 4  | 29041229 | 29110222 | SJC_S000921 | 11373 | 117733 | -  | Sjp_0068790.1 | catalytic activity    | 0.035844 |
| HSB10kb_984 | 4  | 29041229 | 29110222 | SJC_S000921 | 11373 | 117733 | -  | Sjp_0068800.1 | catalytic activity    | 0.035844 |
| HSB10kb_984 | 4  | 29041229 | 29110222 | SJC_S000921 | 11373 | 117733 | -  | Sjp_0068810.1 | NA                    | NA       |
| HSB10kb_984 | 4  | 29041229 | 29110222 | SJC_S000921 | 11373 | 117733 | -  | Sjp_0068820.1 | catalytic activity    | 0.035844 |
| unknown     | NA | NA       | NA       | SJC_S000922 | NA    | NA     | NA | Sjp_0068830.1 | NA                    | NA       |
| unknown     | NA | NA       | NA       | SJC_S000922 | NA    | NA     | NA | Sjp_0068840.1 | NA                    | NA       |
| HSB10kb_985 | WZ | 49660277 | 49740702 | SJC_S000923 | 8094  | 87919  | +  | Sjp_0068850.1 | NA                    | NA       |

|             |       |          |          |             |        |        |    |               |                                                     |          |
|-------------|-------|----------|----------|-------------|--------|--------|----|---------------|-----------------------------------------------------|----------|
| HSB10kb_985 | WZ    | 49660277 | 49740702 | SJC_S000923 | 8094   | 87919  | +  | Sjp_0068860.1 | NA                                                  | NA       |
| HSB10kb_985 | WZ    | 49660277 | 49740702 | SJC_S000923 | 8094   | 87919  | +  | Sjp_0068870.1 | catalytic activity                                  | 0.035844 |
| unknown     | NA    | NA       | NA       | SJC_S000925 | NA     | NA     | NA | Sjp_0068880.1 | NA                                                  | NA       |
| unknown     | NA    | NA       | NA       | SJC_S000926 | NA     | NA     | NA | Sjp_0068890.1 | NA                                                  | NA       |
| unknown     | NA    | NA       | NA       | SJC_S000926 | NA     | NA     | NA | Sjp_0068900.1 | cell part                                           | 0.009037 |
| unknown     | NA    | NA       | NA       | SJC_S000927 | NA     | NA     | NA | Sjp_0068910.1 | NA                                                  | NA       |
| unknown     | NA    | NA       | NA       | SJC_S000928 | NA     | NA     | NA | Sjp_0068930.1 | NA                                                  | NA       |
| HSB10kb_986 | WZ    | 25304042 | 25333759 | SJC_S000929 | 378    | 21486  | +  | Sjp_0068940.1 | catalytic activity                                  | 0.035844 |
| unknown     | NA    | NA       | NA       | SJC_S000930 | NA     | NA     | NA | Sjp_0068950.1 | NA                                                  | NA       |
| HSB10kb_987 | 1     | 21129166 | 21142562 | SJC_S000930 | 40208  | 53379  | -  | Sjp_0068960.1 | NA                                                  | NA       |
| EBR10kb_451 | "1,1" | NA       | NA       | SJC_S000930 | 53380  | 131866 | NA | Sjp_0068970.1 | NA                                                  | NA       |
| HSB10kb_988 | 1     | 20946032 | 21002212 | SJC_S000930 | 131867 | 180674 | -  | Sjp_0068980.1 | NA                                                  | NA       |
| HSB10kb_988 | 1     | 20946032 | 21002212 | SJC_S000930 | 131867 | 180674 | -  | Sjp_0068990.1 | NA                                                  | NA       |
| unknown     | NA    | NA       | NA       | SJC_S000931 | NA     | NA     | NA | Sjp_0069000.1 | NA                                                  | NA       |
| unknown     | NA    | NA       | NA       | SJC_S000932 | NA     | NA     | NA | Sjp_0069010.1 | NA                                                  | NA       |
| HSB10kb_989 | 7     | 8324282  | 8337319  | SJC_S000933 | 23805  | 39812  | -  | Sjp_0069020.1 | binding                                             | 0.052762 |
| unknown     | NA    | NA       | NA       | SJC_S000933 | NA     | NA     | NA | Sjp_0069030.1 | NA                                                  | NA       |
| unknown     | NA    | NA       | NA       | SJC_S000933 | NA     | NA     | NA | Sjp_0069040.1 | NA                                                  | NA       |
| unknown     | NA    | NA       | NA       | SJC_S000933 | NA     | NA     | NA | Sjp_0069050.1 | NA                                                  | NA       |
| unknown     | NA    | NA       | NA       | SJC_S000933 | NA     | NA     | NA | Sjp_0069060.1 | NA                                                  | NA       |
| unknown     | NA    | NA       | NA       | SJC_S000934 | NA     | NA     | NA | Sjp_0069070.1 | catalytic activity                                  | 0.035844 |
| unknown     | NA    | NA       | NA       | SJC_S000935 | NA     | NA     | NA | Sjp_0069080.1 | NA                                                  | NA       |
| unknown     | NA    | NA       | NA       | SJC_S000937 | NA     | NA     | NA | Sjp_0069090.1 | NA                                                  | NA       |
| unknown     | NA    | NA       | NA       | SJC_S000937 | NA     | NA     | NA | Sjp_0069100.1 | NA                                                  | NA       |
| unknown     | NA    | NA       | NA       | SJC_S000937 | NA     | NA     | NA | Sjp_0069110.1 | NA                                                  | NA       |
| unknown     | NA    | NA       | NA       | SJC_S000939 | NA     | NA     | NA | Sjp_0069120.1 | NA                                                  | NA       |
| unknown     | NA    | NA       | NA       | SJC_S000939 | NA     | NA     | NA | Sjp_0069130.1 | binding                                             | 0.052762 |
| HSB10kb_990 | 2     | 5198498  | 5229556  | SJC_S000939 | 101430 | 125096 | -  | Sjp_0069140.1 | protein binding<br>transcription<br>factor activity | NA       |
| HSB10kb_990 | 2     | 5198498  | 5229556  | SJC_S000939 | 101430 | 125096 | -  | Sjp_0069150.1 | molecular<br>transducer<br>activity                 | 0.50162  |
| HSB10kb_991 | 1     | 11174044 | 11245300 | SJC_S000940 | 26256  | 63757  | -  | Sjp_0069160.1 | cellular                                            | NA       |

|             |    |          |          |             |       |       |    |               |                                      |          |
|-------------|----|----------|----------|-------------|-------|-------|----|---------------|--------------------------------------|----------|
|             |    |          |          |             |       |       |    |               | component organization or biogenesis |          |
| unknown     | NA | NA       | NA       | SJC_S000941 | NA    | NA    | NA | Sjp_0069170.1 | binding                              | 0.052762 |
| unknown     | NA | NA       | NA       | SJC_S000942 | NA    | NA    | NA | Sjp_0069180.1 | binding                              | 0.052762 |
| unknown     | NA | NA       | NA       | SJC_S000942 | NA    | NA    | NA | Sjp_0069190.1 | NA                                   | NA       |
| unknown     | NA | NA       | NA       | SJC_S000942 | NA    | NA    | NA | Sjp_0069200.1 | biological regulation                | 0.76396  |
| unknown     | NA | NA       | NA       | SJC_S000942 | NA    | NA    | NA | Sjp_0069210.1 | response to stimulus                 | NA       |
| unknown     | NA | NA       | NA       | SJC_S000942 | NA    | NA    | NA | Sjp_0069220.1 | catalytic activity                   | 0.035844 |
| HSB10kb_992 | WZ | 16112706 | 16140736 | SJC_S000943 | 4610  | 27187 | -  | Sjp_0069230.1 | cellular process                     | 0.63852  |
| unknown     | NA | NA       | NA       | SJC_S000944 | NA    | NA    | NA | Sjp_0069240.1 | NA                                   | NA       |
| HSB10kb_993 | WZ | 13034385 | 13053951 | SJC_S000944 | 15701 | 41782 | -  | Sjp_0069250.1 | biological regulation                | 0.76396  |
| HSB10kb_993 | WZ | 13034385 | 13053951 | SJC_S000944 | 15701 | 41782 | -  | Sjp_0069260.1 | NA                                   | NA       |
| unknown     | NA | NA       | NA       | SJC_S000944 | NA    | NA    | NA | Sjp_0069270.1 | cell part                            | 0.009037 |
| unknown     | NA | NA       | NA       | SJC_S000945 | NA    | NA    | NA | Sjp_0069280.1 | NA                                   | NA       |
| unknown     | NA | NA       | NA       | SJC_S000947 | NA    | NA    | NA | Sjp_0069290.1 | biological regulation                | 0.76396  |
| unknown     | NA | NA       | NA       | SJC_S000948 | NA    | NA    | NA | Sjp_0069300.1 | NA                                   | NA       |
| unknown     | NA | NA       | NA       | SJC_S000950 | NA    | NA    | NA | Sjp_0069310.1 | binding                              | 0.052762 |
| HSB10kb_994 | 3  | 8632641  | 8646012  | SJC_S000950 | 22194 | 57826 | +  | Sjp_0069320.1 | NA                                   | NA       |
| HSB10kb_994 | 3  | 8632641  | 8646012  | SJC_S000950 | 22194 | 57826 | +  | Sjp_0069330.1 | cell part                            | 0.009037 |
| HSB10kb_994 | 3  | 8632641  | 8646012  | SJC_S000950 | 22194 | 57826 | +  | Sjp_0069340.1 | cell part                            | 0.009037 |
| HSB10kb_994 | 3  | 8632641  | 8646012  | SJC_S000950 | 22194 | 57826 | +  | Sjp_0069350.1 | cell part                            | 0.009037 |
| unknown     | NA | NA       | NA       | SJC_S000951 | NA    | NA    | NA | Sjp_0069360.1 | NA                                   | NA       |
| unknown     | NA | NA       | NA       | SJC_S000952 | NA    | NA    | NA | Sjp_0069370.1 | NA                                   | NA       |
| unknown     | NA | NA       | NA       | SJC_S000953 | NA    | NA    | NA | Sjp_0069380.1 | catalytic activity                   | 0.035844 |
| HSB10kb_995 | 1  | 43345995 | 43370114 | SJC_S000954 | 36621 | 51567 | +  | Sjp_0069390.1 | NA                                   | NA       |
| HSB10kb_996 | 1  | 33111933 | 33139590 | SJC_S000955 | 4752  | 24848 | +  | Sjp_0069400.1 | NA                                   | NA       |
| HSB10kb_996 | 1  | 33111933 | 33139590 | SJC_S000955 | 4752  | 24848 | +  | Sjp_0069410.1 | NA                                   | NA       |
| HSB10kb_997 | WZ | 30420219 | 30493111 | SJC_S000956 | 11259 | 65440 | -  | Sjp_0069420.1 | NA                                   | NA       |
| HSB10kb_997 | WZ | 30420219 | 30493111 | SJC_S000956 | 11259 | 65440 | -  | Sjp_0069430.1 | cell part                            | 0.009037 |

|              |       |          |          |             |       |        |    |               |                           |          |
|--------------|-------|----------|----------|-------------|-------|--------|----|---------------|---------------------------|----------|
| unknown      | NA    | NA       | NA       | SJC_S000957 | NA    | NA     | NA | Sjp_0069440.1 | NA                        | NA       |
| unknown      | NA    | NA       | NA       | SJC_S000958 | NA    | NA     | NA | Sjp_0069450.1 | biological regulation     | 0.76396  |
| unknown      | NA    | NA       | NA       | SJC_S000958 | NA    | NA     | NA | Sjp_0069460.1 | NA                        | NA       |
| unknown      | NA    | NA       | NA       | SJC_S000959 | NA    | NA     | NA | Sjp_0069470.1 | biological adhesion       | NA       |
| unknown      | NA    | NA       | NA       | SJC_S000959 | NA    | NA     | NA | Sjp_0069480.1 | enzyme regulator activity | 0.1755   |
| HSB10kb_998  | 1     | 45558148 | 45593595 | SJC_S000960 | 7430  | 59140  | -  | Sjp_0069490.1 | NA                        | NA       |
| HSB10kb_998  | 1     | 45558148 | 45593595 | SJC_S000960 | 7430  | 59140  | -  | Sjp_0069500.1 | NA                        | NA       |
| HSB10kb_998  | 1     | 45558148 | 45593595 | SJC_S000960 | 7430  | 59140  | -  | Sjp_0069510.1 | NA                        | NA       |
| unknown      | NA    | NA       | NA       | SJC_S000961 | NA    | NA     | NA | Sjp_0069520.1 | NA                        | NA       |
| HSB10kb_999  | 1     | 37409965 | 37770018 | SJC_S000961 | 23453 | 318193 | -  | Sjp_0069530.1 | binding                   | 0.052762 |
| HSB10kb_999  | 1     | 37409965 | 37770018 | SJC_S000961 | 23453 | 318193 | -  | Sjp_0069540.1 | NA                        | NA       |
| HSB10kb_999  | 1     | 37409965 | 37770018 | SJC_S000961 | 23453 | 318193 | -  | Sjp_0069550.1 | NA                        | NA       |
| HSB10kb_999  | 1     | 37409965 | 37770018 | SJC_S000961 | 23453 | 318193 | -  | Sjp_0069560.1 | binding                   | 0.052762 |
| HSB10kb_999  | 1     | 37409965 | 37770018 | SJC_S000961 | 23453 | 318193 | -  | Sjp_0069570.1 | NA                        | NA       |
| HSB10kb_999  | 1     | 37409965 | 37770018 | SJC_S000961 | 23453 | 318193 | -  | Sjp_0069590.1 | NA                        | NA       |
| HSB10kb_999  | 1     | 37409965 | 37770018 | SJC_S000961 | 23453 | 318193 | -  | Sjp_0069600.1 | NA                        | NA       |
| HSB10kb_1000 | 1     | 26624554 | 26638402 | SJC_S000962 | 3573  | 14794  | -  | Sjp_0069610.1 | enzyme regulator activity | 0.1755   |
| EBR10kb_452  | "1,1" | NA       | NA       | SJC_S000962 | 14795 | 27815  | NA | NA            | NA                        | NA       |
| HSB10kb_1001 | 1     | 25572383 | 25864642 | SJC_S000962 | 27816 | 259115 | -  | Sjp_0069620.1 | NA                        | NA       |
| HSB10kb_1001 | 1     | 25572383 | 25864642 | SJC_S000962 | 27816 | 259115 | -  | Sjp_0069630.1 | NA                        | NA       |
| HSB10kb_1001 | 1     | 25572383 | 25864642 | SJC_S000962 | 27816 | 259115 | -  | Sjp_0069640.1 | binding                   | 0.052762 |
| HSB10kb_1001 | 1     | 25572383 | 25864642 | SJC_S000962 | 27816 | 259115 | -  | Sjp_0069650.1 | NA                        | NA       |
| HSB10kb_1001 | 1     | 25572383 | 25864642 | SJC_S000962 | 27816 | 259115 | -  | Sjp_0069660.1 | NA                        | NA       |
| HSB10kb_1001 | 1     | 25572383 | 25864642 | SJC_S000962 | 27816 | 259115 | -  | Sjp_0069670.1 | NA                        | NA       |
| HSB10kb_1001 | 1     | 25572383 | 25864642 | SJC_S000962 | 27816 | 259115 | -  | Sjp_0069680.1 | NA                        | NA       |
| HSB10kb_1001 | 1     | 25572383 | 25864642 | SJC_S000962 | 27816 | 259115 | -  | Sjp_0069690.1 | transporter activity      | 0.782    |
| HSB10kb_1001 | 1     | 25572383 | 25864642 | SJC_S000962 | 27816 | 259115 | -  | Sjp_0069710.1 | NA                        | NA       |

|              |    |          |          |             |       |        |    |               |                              |          |
|--------------|----|----------|----------|-------------|-------|--------|----|---------------|------------------------------|----------|
| unknown      | NA | NA       | NA       | SJC_S000963 | NA    | NA     | NA | Sjp_0069720.1 | biological regulation        | 0.76396  |
| unknown      | NA | NA       | NA       | SJC_S000963 | NA    | NA     | NA | Sjp_0069730.1 | binding                      | 0.052762 |
| unknown      | NA | NA       | NA       | SJC_S000963 | NA    | NA     | NA | Sjp_0069740.1 | NA                           | NA       |
| unknown      | NA | NA       | NA       | SJC_S000963 | NA    | NA     | NA | Sjp_0069750.1 | NA                           | NA       |
| unknown      | NA | NA       | NA       | SJC_S000963 | NA    | NA     | NA | Sjp_0069760.1 | catalytic activity           | 0.035844 |
| unknown      | NA | NA       | NA       | SJC_S000963 | NA    | NA     | NA | Sjp_0069770.1 | NA                           | NA       |
| unknown      | NA | NA       | NA       | SJC_S000963 | NA    | NA     | NA | Sjp_0069780.1 | extracellular region part    | NA       |
| unknown      | NA | NA       | NA       | SJC_S000963 | NA    | NA     | NA | Sjp_0069790.1 | catalytic activity           | 0.035844 |
| unknown      | NA | NA       | NA       | SJC_S000963 | NA    | NA     | NA | Sjp_0069800.1 | NA                           | NA       |
| unknown      | NA | NA       | NA       | SJC_S000963 | NA    | NA     | NA | Sjp_0069820.1 | NA                           | NA       |
| unknown      | NA | NA       | NA       | SJC_S000963 | NA    | NA     | NA | Sjp_0069830.1 | catalytic activity           | 0.035844 |
| unknown      | NA | NA       | NA       | SJC_S000963 | NA    | NA     | NA | Sjp_0069840.1 | NA                           | NA       |
| unknown      | NA | NA       | NA       | SJC_S000964 | NA    | NA     | NA | Sjp_0069850.1 | biological regulation        | 0.76396  |
| unknown      | NA | NA       | NA       | SJC_S000964 | NA    | NA     | NA | Sjp_0069860.1 | NA                           | NA       |
| HSB10kb_1002 | 1  | 32279265 | 32483370 | SJC_S000964 | 36979 | 68278  | +  | Sjp_0069870.1 | structural molecule activity | NA       |
| HSB10kb_1002 | 1  | 32279265 | 32483370 | SJC_S000964 | 36979 | 68278  | +  | Sjp_0069880.1 | NA                           | NA       |
| HSB10kb_1002 | 1  | 32279265 | 32483370 | SJC_S000964 | 36979 | 68278  | +  | Sjp_0069890.1 | NA                           | NA       |
| unknown      | NA | NA       | NA       | SJC_S000964 | NA    | NA     | NA | Sjp_0069900.1 | NA                           | NA       |
| HSB10kb_1003 | 1  | 36083553 | 36297689 | SJC_S000965 | 806   | 177585 | +  | Sjp_0069910.1 | catalytic activity           | 0.035844 |
| HSB10kb_1003 | 1  | 36083553 | 36297689 | SJC_S000965 | 806   | 177585 | +  | Sjp_0069920.1 | NA                           | NA       |
| HSB10kb_1003 | 1  | 36083553 | 36297689 | SJC_S000965 | 806   | 177585 | +  | Sjp_0069930.1 | NA                           | NA       |
| HSB10kb_1003 | 1  | 36083553 | 36297689 | SJC_S000965 | 806   | 177585 | +  | Sjp_0069940.1 | cell part                    | 0.009037 |
| HSB10kb_1003 | 1  | 36083553 | 36297689 | SJC_S000965 | 806   | 177585 | +  | Sjp_0069950.1 | catalytic activity           | 0.035844 |
| HSB10kb_1003 | 1  | 36083553 | 36297689 | SJC_S000965 | 806   | 177585 | +  | Sjp_0069960.1 | catalytic activity           | 0.035844 |
| HSB10kb_1003 | 1  | 36083553 | 36297689 | SJC_S000965 | 806   | 177585 | +  | Sjp_0069970.1 | cellular process             | 0.63852  |
| HSB10kb_1003 | 1  | 36083553 | 36297689 | SJC_S000965 | 806   | 177585 | +  | Sjp_0069980.1 | NA                           | NA       |
| HSB10kb_1004 | 3  | 12489182 | 12538942 | SJC_S000966 | 6773  | 50397  | +  | Sjp_0069990.1 | NA                           | NA       |
| HSB10kb_1004 | 3  | 12489182 | 12538942 | SJC_S000966 | 6773  | 50397  | +  | Sjp_0070010.1 | NA                           | NA       |
| HSB10kb_1004 | 3  | 12489182 | 12538942 | SJC_S000966 | 6773  | 50397  | +  | Sjp_0070020.1 | NA                           | NA       |

|              |       |          |          |             |        |        |    |               |                               |          |
|--------------|-------|----------|----------|-------------|--------|--------|----|---------------|-------------------------------|----------|
| EBR10kb_453  | "3,3" | NA       | NA       | SJC_S000966 | 50398  | 53102  | NA | Sjp_0070020.1 | NA                            | NA       |
| HSB10kb_1005 | 3     | 12438484 | 12486362 | SJC_S000966 | 53103  | 115124 | -  | Sjp_0070020.1 | NA                            | NA       |
| HSB10kb_1005 | 3     | 12438484 | 12486362 | SJC_S000966 | 53103  | 115124 | -  | Sjp_0070030.1 | biological regulation         | 0.76396  |
| HSB10kb_1005 | 3     | 12438484 | 12486362 | SJC_S000966 | 53103  | 115124 | -  | Sjp_0070040.1 | cell part                     | 0.009037 |
| HSB10kb_1005 | 3     | 12438484 | 12486362 | SJC_S000966 | 53103  | 115124 | -  | Sjp_0070050.1 | NA                            | NA       |
| EBR10kb_454  | "3,3" | NA       | NA       | SJC_S000966 | 115125 | 145720 | NA | Sjp_0070050.1 | NA                            | NA       |
| EBR10kb_454  | "3,3" | NA       | NA       | SJC_S000966 | 115125 | 145720 | NA | Sjp_0070060.1 | NA                            | NA       |
| EBR10kb_454  | "3,3" | NA       | NA       | SJC_S000966 | 115125 | 145720 | NA | Sjp_0070070.1 | catalytic activity            | 0.035844 |
| HSB10kb_1006 | 3     | 19909417 | 19927365 | SJC_S000966 | 145721 | 167905 | -  | Sjp_0070070.1 | catalytic activity            | 0.035844 |
| HSB10kb_1006 | 3     | 19909417 | 19927365 | SJC_S000966 | 145721 | 167905 | -  | Sjp_0070080.1 | NA                            | NA       |
| unknown      | NA    | NA       | NA       | SJC_S000967 | NA     | NA     | NA | Sjp_0070090.1 | NA                            | NA       |
| unknown      | NA    | NA       | NA       | SJC_S000967 | NA     | NA     | NA | Sjp_0070100.1 | NA                            | NA       |
| unknown      | NA    | NA       | NA       | SJC_S000967 | NA     | NA     | NA | Sjp_0070110.1 | NA                            | NA       |
| unknown      | NA    | NA       | NA       | SJC_S000967 | NA     | NA     | NA | Sjp_0070120.1 | NA                            | NA       |
| unknown      | NA    | NA       | NA       | SJC_S000967 | NA     | NA     | NA | Sjp_0070140.1 | response to stimulus          | NA       |
| unknown      | NA    | NA       | NA       | SJC_S000967 | NA     | NA     | NA | Sjp_0070150.1 | cell part                     | 0.009037 |
| unknown      | NA    | NA       | NA       | SJC_S000967 | NA     | NA     | NA | Sjp_0070160.1 | cell part                     | 0.009037 |
| unknown      | NA    | NA       | NA       | SJC_S000967 | NA     | NA     | NA | Sjp_0070170.1 | NA                            | NA       |
| unknown      | NA    | NA       | NA       | SJC_S000967 | NA     | NA     | NA | Sjp_0070180.1 | response to stimulus          | NA       |
| unknown      | NA    | NA       | NA       | SJC_S000967 | NA     | NA     | NA | Sjp_0070190.1 | NA                            | NA       |
| unknown      | NA    | NA       | NA       | SJC_S000967 | NA     | NA     | NA | Sjp_0070200.1 | NA                            | NA       |
| unknown      | NA    | NA       | NA       | SJC_S000968 | NA     | NA     | NA | Sjp_0070210.1 | catalytic activity            | 0.035844 |
| HSB10kb_1007 | WZ    | 41603654 | 41683308 | SJC_S000968 | 32985  | 90677  | -  | Sjp_0070220.1 | enzyme regulator activity     | 0.1755   |
| HSB10kb_1007 | WZ    | 41603654 | 41683308 | SJC_S000968 | 32985  | 90677  | -  | Sjp_0070230.1 | NA                            | NA       |
| HSB10kb_1007 | WZ    | 41603654 | 41683308 | SJC_S000968 | 32985  | 90677  | -  | Sjp_0070240.1 | NA                            | NA       |
| HSB10kb_1007 | WZ    | 41603654 | 41683308 | SJC_S000968 | 32985  | 90677  | -  | Sjp_0070250.1 | establishment of localization | NA       |
| HSB10kb_1007 | WZ    | 41603654 | 41683308 | SJC_S000968 | 32985  | 90677  | -  | Sjp_0070260.1 | NA                            | NA       |
| HSB10kb_1007 | WZ    | 41603654 | 41683308 | SJC_S000968 | 32985  | 90677  | -  | Sjp_0070270.1 | NA                            | NA       |

|              |    |          |          |             |       |        |    |               |                               |          |
|--------------|----|----------|----------|-------------|-------|--------|----|---------------|-------------------------------|----------|
| unknown      | NA | NA       | NA       | SJC_S000968 | NA    | NA     | NA | Sjp_0070280.1 | biological regulation         | 0.76396  |
| HSB10kb_1008 | 2  | 15445183 | 15621655 | SJC_S000969 | 27352 | 152173 | -  | Sjp_0070290.1 | catalytic activity            | 0.035844 |
| HSB10kb_1008 | 2  | 15445183 | 15621655 | SJC_S000969 | 27352 | 152173 | -  | Sjp_0070300.1 | cell part                     | 0.009037 |
| HSB10kb_1008 | 2  | 15445183 | 15621655 | SJC_S000969 | 27352 | 152173 | -  | Sjp_0070310.1 | cell part                     | 0.009037 |
| HSB10kb_1008 | 2  | 15445183 | 15621655 | SJC_S000969 | 27352 | 152173 | -  | Sjp_0070320.1 | biological regulation         | 0.76396  |
| HSB10kb_1008 | 2  | 15445183 | 15621655 | SJC_S000969 | 27352 | 152173 | -  | Sjp_0070330.1 | cell part                     | 0.009037 |
| HSB10kb_1009 | 1  | 45349153 | 45469879 | SJC_S000970 | 8138  | 132422 | -  | Sjp_0070340.1 | NA                            | NA       |
| HSB10kb_1009 | 1  | 45349153 | 45469879 | SJC_S000970 | 8138  | 132422 | -  | Sjp_0070350.1 | NA                            | NA       |
| HSB10kb_1009 | 1  | 45349153 | 45469879 | SJC_S000970 | 8138  | 132422 | -  | Sjp_0070370.1 | NA                            | NA       |
| HSB10kb_1009 | 1  | 45349153 | 45469879 | SJC_S000970 | 8138  | 132422 | -  | Sjp_0070380.1 | cell part                     | 0.009037 |
| HSB10kb_1009 | 1  | 45349153 | 45469879 | SJC_S000970 | 8138  | 132422 | -  | Sjp_0070390.1 | NA                            | NA       |
| HSB10kb_1009 | 1  | 45349153 | 45469879 | SJC_S000970 | 8138  | 132422 | -  | Sjp_0070400.1 | cell part                     | 0.009037 |
| unknown      | NA | NA       | NA       | SJC_S000970 | NA    | NA     | NA | Sjp_0070410.1 | biological regulation         | 0.76396  |
| unknown      | NA | NA       | NA       | SJC_S000971 | NA    | NA     | NA | Sjp_0070420.1 | NA                            | NA       |
| HSB10kb_1010 | 1  | 48440342 | 48513352 | SJC_S000971 | 29164 | 103019 | -  | Sjp_0070430.1 | catalytic activity            | 0.035844 |
| HSB10kb_1010 | 1  | 48440342 | 48513352 | SJC_S000971 | 29164 | 103019 | -  | Sjp_0070440.1 | cell part                     | 0.009037 |
| HSB10kb_1010 | 1  | 48440342 | 48513352 | SJC_S000971 | 29164 | 103019 | -  | Sjp_0070450.1 | cell part                     | 0.009037 |
| unknown      | NA | NA       | NA       | SJC_S000971 | NA    | NA     | NA | Sjp_0070460.1 | establishment of localization | NA       |
| unknown      | NA | NA       | NA       | SJC_S000972 | NA    | NA     | NA | Sjp_0070470.1 | NA                            | NA       |
| unknown      | NA | NA       | NA       | SJC_S000972 | NA    | NA     | NA | Sjp_0070480.1 | metabolic process             | 0.41934  |
| unknown      | NA | NA       | NA       | SJC_S000974 | NA    | NA     | NA | Sjp_0070490.1 | NA                            | NA       |
| unknown      | NA | NA       | NA       | SJC_S000974 | NA    | NA     | NA | Sjp_0070500.1 | NA                            | NA       |
| unknown      | NA | NA       | NA       | SJC_S000975 | NA    | NA     | NA | Sjp_0070510.1 | catalytic activity            | 0.035844 |
| unknown      | NA | NA       | NA       | SJC_S000975 | NA    | NA     | NA | Sjp_0070520.1 | NA                            | NA       |
| unknown      | NA | NA       | NA       | SJC_S000976 | NA    | NA     | NA | Sjp_0070530.1 | cellular process              | 0.63852  |
| unknown      | NA | NA       | NA       | SJC_S000976 | NA    | NA     | NA | Sjp_0070540.1 | enzyme regulator activity     | 0.1755   |
| unknown      | NA | NA       | NA       | SJC_S000976 | NA    | NA     | NA | Sjp_0070550.1 | NA                            | NA       |

|              |    |          |          |             |       |       |    |               |                                  |          |
|--------------|----|----------|----------|-------------|-------|-------|----|---------------|----------------------------------|----------|
| unknown      | NA | NA       | NA       | SJC_S000977 | NA    | NA    | NA | Sjp_0070560.1 | establishment of localization    | NA       |
| unknown      | NA | NA       | NA       | SJC_S000977 | NA    | NA    | NA | Sjp_0070570.1 | establishment of localization    | NA       |
| unknown      | NA | NA       | NA       | SJC_S000977 | NA    | NA    | NA | Sjp_0070580.1 | NA                               | NA       |
| unknown      | NA | NA       | NA       | SJC_S000977 | NA    | NA    | NA | Sjp_0070590.1 | catalytic activity               | 0.035844 |
| unknown      | NA | NA       | NA       | SJC_S000979 | NA    | NA    | NA | Sjp_0070610.1 | catalytic activity               | 0.035844 |
| unknown      | NA | NA       | NA       | SJC_S000980 | NA    | NA    | NA | Sjp_0070620.1 | NA                               | NA       |
| HSB10kb_1011 | 2  | 3844826  | 3859510  | SJC_S000981 | 4701  | 27389 | +  | Sjp_0070630.1 | NA                               | NA       |
| unknown      | NA | NA       | NA       | SJC_S000982 | NA    | NA    | NA | Sjp_0070640.1 | NA                               | NA       |
| HSB10kb_1012 | 1  | 17024483 | 17113009 | SJC_S000982 | 12268 | 96778 | +  | Sjp_0070650.1 | NA                               | NA       |
| HSB10kb_1012 | 1  | 17024483 | 17113009 | SJC_S000982 | 12268 | 96778 | +  | Sjp_0070660.1 | NA                               | NA       |
| unknown      | NA | NA       | NA       | SJC_S000983 | NA    | NA    | NA | Sjp_0070680.1 | biological regulation            | 0.76396  |
| HSB10kb_1013 | 4  | 24896209 | 24924364 | SJC_S000983 | 36162 | 62757 | -  | Sjp_0070690.1 | NA                               | NA       |
| HSB10kb_1013 | 4  | 24896209 | 24924364 | SJC_S000983 | 36162 | 62757 | -  | Sjp_0070700.1 | NA                               | NA       |
| unknown      | NA | NA       | NA       | SJC_S000983 | NA    | NA    | NA | Sjp_0070710.1 | binding                          | 0.052762 |
| unknown      | NA | NA       | NA       | SJC_S000983 | NA    | NA    | NA | Sjp_0070720.1 | multicellular organismal process | NA       |
| unknown      | NA | NA       | NA       | SJC_S000984 | NA    | NA    | NA | Sjp_0070730.1 | NA                               | NA       |
| unknown      | NA | NA       | NA       | SJC_S000984 | NA    | NA    | NA | Sjp_0070740.1 | biological regulation            | 0.76396  |
| unknown      | NA | NA       | NA       | SJC_S000985 | NA    | NA    | NA | Sjp_0070750.1 | biological regulation            | 0.76396  |
| unknown      | NA | NA       | NA       | SJC_S000985 | NA    | NA    | NA | Sjp_0070760.1 | NA                               | NA       |
| unknown      | NA | NA       | NA       | SJC_S000986 | NA    | NA    | NA | Sjp_0070770.1 | transporter activity             | 0.782    |
| unknown      | NA | NA       | NA       | SJC_S000986 | NA    | NA    | NA | Sjp_0070780.1 | catalytic activity               | 0.035844 |
| unknown      | NA | NA       | NA       | SJC_S000986 | NA    | NA    | NA | Sjp_0070790.1 | NA                               | NA       |
| unknown      | NA | NA       | NA       | SJC_S000986 | NA    | NA    | NA | Sjp_0070800.1 | NA                               | NA       |
| unknown      | NA | NA       | NA       | SJC_S000987 | NA    | NA    | NA | Sjp_0070810.1 | cell part                        | 0.009037 |
| HSB10kb_1014 | 2  | 13653615 | 13673468 | SJC_S000987 | 38136 | 61777 | +  | Sjp_0070820.1 | NA                               | NA       |
| HSB10kb_1014 | 2  | 13653615 | 13673468 | SJC_S000987 | 38136 | 61777 | +  | Sjp_0070830.1 | NA                               | NA       |



|              |    |          |          |             |       |        |    |               |                               |          |
|--------------|----|----------|----------|-------------|-------|--------|----|---------------|-------------------------------|----------|
| unknown      | NA | NA       | NA       | SJC_S000988 | NA    | NA     | NA | Sjp_0070840.1 | NA                            | NA       |
| unknown      | NA | NA       | NA       | SJC_S000990 | NA    | NA     | NA | Sjp_0070850.1 | NA                            | NA       |
| unknown      | NA | NA       | NA       | SJC_S000991 | NA    | NA     | NA | Sjp_0070860.1 | NA                            | NA       |
| unknown      | NA | NA       | NA       | SJC_S000991 | NA    | NA     | NA | Sjp_0070870.1 | NA                            | NA       |
| unknown      | NA | NA       | NA       | SJC_S000992 | NA    | NA     | NA | Sjp_0070880.1 | NA                            | NA       |
| unknown      | NA | NA       | NA       | SJC_S000993 | NA    | NA     | NA | Sjp_0070890.1 | biological regulation         | 0.76396  |
| unknown      | NA | NA       | NA       | SJC_S000994 | NA    | NA     | NA | Sjp_0070900.1 | catalytic activity            | 0.035844 |
| unknown      | NA | NA       | NA       | SJC_S000994 | NA    | NA     | NA | Sjp_0070910.1 | binding                       | 0.052762 |
| HSB10kb_1015 | WZ | 32741189 | 32777397 | SJC_S000995 | 6838  | 28410  | +  | Sjp_0070920.1 | NA                            | NA       |
| HSB10kb_1015 | WZ | 32741189 | 32777397 | SJC_S000995 | 6838  | 28410  | +  | Sjp_0070930.1 | biological regulation         | 0.76396  |
| unknown      | NA | NA       | NA       | SJC_S000996 | NA    | NA     | NA | Sjp_0070940.1 | biological regulation         | 0.76396  |
| unknown      | NA | NA       | NA       | SJC_S000996 | NA    | NA     | NA | Sjp_0070950.1 | enzyme regulator activity     | 0.1755   |
| unknown      | NA | NA       | NA       | SJC_S000996 | NA    | NA     | NA | Sjp_0070960.1 | cell part                     | 0.009037 |
| unknown      | NA | NA       | NA       | SJC_S000996 | NA    | NA     | NA | Sjp_0070970.1 | NA                            | NA       |
| HSB10kb_1016 | 4  | 15724942 | 15945469 | SJC_S000997 | 13092 | 235572 | -  | Sjp_0070980.1 | NA                            | NA       |
| HSB10kb_1016 | 4  | 15724942 | 15945469 | SJC_S000997 | 13092 | 235572 | -  | Sjp_0070990.1 | biological regulation         | 0.76396  |
| HSB10kb_1016 | 4  | 15724942 | 15945469 | SJC_S000997 | 13092 | 235572 | -  | Sjp_0071000.1 | NA                            | NA       |
| HSB10kb_1016 | 4  | 15724942 | 15945469 | SJC_S000997 | 13092 | 235572 | -  | Sjp_0071010.1 | NA                            | NA       |
| HSB10kb_1016 | 4  | 15724942 | 15945469 | SJC_S000997 | 13092 | 235572 | -  | Sjp_0071020.1 | NA                            | NA       |
| HSB10kb_1016 | 4  | 15724942 | 15945469 | SJC_S000997 | 13092 | 235572 | -  | Sjp_0071030.1 | NA                            | NA       |
| unknown      | NA | NA       | NA       | SJC_S000998 | NA    | NA     | NA | Sjp_0071040.1 | establishment of localization | NA       |
| unknown      | NA | NA       | NA       | SJC_S000998 | NA    | NA     | NA | Sjp_0071050.1 | binding                       | 0.052762 |
| unknown      | NA | NA       | NA       | SJC_S000998 | NA    | NA     | NA | Sjp_0071060.1 | catalytic activity            | 0.035844 |
| unknown      | NA | NA       | NA       | SJC_S000998 | NA    | NA     | NA | Sjp_0071070.1 | NA                            | NA       |
| unknown      | NA | NA       | NA       | SJC_S000998 | NA    | NA     | NA | Sjp_0071080.1 | metabolic process             | 0.41934  |
| unknown      | NA | NA       | NA       | SJC_S000998 | NA    | NA     | NA | Sjp_0071090.1 | NA                            | NA       |

|              |    |          |          |             |       |        |    |               |                               |          |
|--------------|----|----------|----------|-------------|-------|--------|----|---------------|-------------------------------|----------|
| unknown      | NA | NA       | NA       | SJC_S000999 | NA    | NA     | NA | Sjp_0071100.1 | biological regulation         | 0.76396  |
| unknown      | NA | NA       | NA       | SJC_S000999 | NA    | NA     | NA | Sjp_0071110.1 | NA                            | NA       |
| unknown      | NA | NA       | NA       | SJC_S000999 | NA    | NA     | NA | Sjp_0071120.1 | catalytic activity            | 0.035844 |
| unknown      | NA | NA       | NA       | SJC_S000999 | NA    | NA     | NA | Sjp_0071130.1 | cellular process              | 0.63852  |
| HSB10kb_1017 | 3  | 13756019 | 13825418 | SJC_S000999 | 82902 | 132922 | -  | Sjp_0071140.1 | cellular process              | 0.63852  |
| HSB10kb_1017 | 3  | 13756019 | 13825418 | SJC_S000999 | 82902 | 132922 | -  | Sjp_0071150.1 | molecular transducer activity | 0.50162  |
| HSB10kb_1017 | 3  | 13756019 | 13825418 | SJC_S000999 | 82902 | 132922 | -  | Sjp_0071160.1 | molecular transducer activity | 0.50162  |
| unknown      | NA | NA       | NA       | SJC_S001000 | NA    | NA     | NA | Sjp_0071170.1 | cell part                     | 0.009037 |
| unknown      | NA | NA       | NA       | SJC_S001000 | NA    | NA     | NA | Sjp_0071180.1 | NA                            | NA       |
| unknown      | NA | NA       | NA       | SJC_S001001 | NA    | NA     | NA | Sjp_0071190.1 | catalytic activity            | 0.035844 |
| unknown      | NA | NA       | NA       | SJC_S001001 | NA    | NA     | NA | Sjp_0071200.1 | NA                            | NA       |
| unknown      | NA | NA       | NA       | SJC_S001001 | NA    | NA     | NA | Sjp_0071210.1 | NA                            | NA       |
| unknown      | NA | NA       | NA       | SJC_S001001 | NA    | NA     | NA | Sjp_0071220.1 | cellular process              | 0.63852  |
| unknown      | NA | NA       | NA       | SJC_S001001 | NA    | NA     | NA | Sjp_0071230.1 | NA                            | NA       |
| unknown      | NA | NA       | NA       | SJC_S001001 | NA    | NA     | NA | Sjp_0071240.1 | NA                            | NA       |
| unknown      | NA | NA       | NA       | SJC_S001003 | NA    | NA     | NA | Sjp_0071250.1 | catalytic activity            | 0.035844 |
| unknown      | NA | NA       | NA       | SJC_S001004 | NA    | NA     | NA | Sjp_0071260.1 | NA                            | NA       |
| unknown      | NA | NA       | NA       | SJC_S001004 | NA    | NA     | NA | Sjp_0071270.1 | NA                            | NA       |
| unknown      | NA | NA       | NA       | SJC_S001004 | NA    | NA     | NA | Sjp_0071280.1 | NA                            | NA       |
| unknown      | NA | NA       | NA       | SJC_S001004 | NA    | NA     | NA | Sjp_0071290.1 | NA                            | NA       |
| unknown      | NA | NA       | NA       | SJC_S001004 | NA    | NA     | NA | Sjp_0071300.1 | NA                            | NA       |
| unknown      | NA | NA       | NA       | SJC_S001005 | NA    | NA     | NA | Sjp_0071310.1 | NA                            | NA       |
| unknown      | NA | NA       | NA       | SJC_S001005 | NA    | NA     | NA | Sjp_0071320.1 | catalytic activity            | 0.035844 |
| unknown      | NA | NA       | NA       | SJC_S001005 | NA    | NA     | NA | Sjp_0071330.1 | catalytic activity            | 0.035844 |
| unknown      | NA | NA       | NA       | SJC_S001005 | NA    | NA     | NA | Sjp_0071340.1 | catalytic activity            | 0.035844 |
| unknown      | NA | NA       | NA       | SJC_S001006 | NA    | NA     | NA | Sjp_0071350.1 | NA                            | NA       |
| unknown      | NA | NA       | NA       | SJC_S001007 | NA    | NA     | NA | Sjp_0071360.1 | NA                            | NA       |
| unknown      | NA | NA       | NA       | SJC_S001007 | NA    | NA     | NA | Sjp_0071370.1 | binding                       | 0.052762 |
| unknown      | NA | NA       | NA       | SJC_S001007 | NA    | NA     | NA | Sjp_0071380.1 | NA                            | NA       |

|              |       |          |          |             |        |        |    |               |                               |          |
|--------------|-------|----------|----------|-------------|--------|--------|----|---------------|-------------------------------|----------|
| unknown      | NA    | NA       | NA       | SJC_S001007 | NA     | NA     | NA | Sjp_0071390.1 | NA                            | NA       |
| unknown      | NA    | NA       | NA       | SJC_S001008 | NA     | NA     | NA | Sjp_0071400.1 | transporter activity          | 0.782    |
| unknown      | NA    | NA       | NA       | SJC_S001008 | NA     | NA     | NA | Sjp_0071410.1 | NA                            | NA       |
| unknown      | NA    | NA       | NA       | SJC_S001008 | NA     | NA     | NA | Sjp_0071420.1 | NA                            | NA       |
| unknown      | NA    | NA       | NA       | SJC_S001010 | NA     | NA     | NA | Sjp_0071430.1 | transporter activity          | 0.782    |
| unknown      | NA    | NA       | NA       | SJC_S001010 | NA     | NA     | NA | Sjp_0071440.1 | catalytic activity            | 0.035844 |
| HSB10kb_1018 | 3     | 24076787 | 24115590 | SJC_S001011 | 27436  | 78212  | +  | Sjp_0071450.1 | NA                            | NA       |
| HSB10kb_1018 | 3     | 24076787 | 24115590 | SJC_S001011 | 27436  | 78212  | +  | Sjp_0071460.1 | cell part                     | 0.009037 |
| unknown      | NA    | NA       | NA       | SJC_S001011 | NA     | NA     | NA | Sjp_0071480.1 | NA                            | NA       |
| unknown      | NA    | NA       | NA       | SJC_S001012 | NA     | NA     | NA | Sjp_0071490.1 | NA                            | NA       |
| unknown      | NA    | NA       | NA       | SJC_S001012 | NA     | NA     | NA | Sjp_0071500.1 | NA                            | NA       |
| unknown      | NA    | NA       | NA       | SJC_S001012 | NA     | NA     | NA | Sjp_0071510.1 | biological regulation         | 0.76396  |
| unknown      | NA    | NA       | NA       | SJC_S001013 | NA     | NA     | NA | Sjp_0071520.1 | catalytic activity            | 0.035844 |
| unknown      | NA    | NA       | NA       | SJC_S001013 | NA     | NA     | NA | Sjp_0071530.1 | binding                       | 0.052762 |
| unknown      | NA    | NA       | NA       | SJC_S001014 | NA     | NA     | NA | Sjp_0071540.1 | molecular transducer activity | 0.50162  |
| unknown      | NA    | NA       | NA       | SJC_S001014 | NA     | NA     | NA | Sjp_0071550.1 | biological regulation         | 0.76396  |
| unknown      | NA    | NA       | NA       | SJC_S001014 | NA     | NA     | NA | Sjp_0071560.1 | binding                       | 0.052762 |
| unknown      | NA    | NA       | NA       | SJC_S001015 | NA     | NA     | NA | Sjp_0071570.1 | NA                            | NA       |
| unknown      | NA    | NA       | NA       | SJC_S001015 | NA     | NA     | NA | Sjp_0071580.1 | NA                            | NA       |
| HSB10kb_1019 | 5     | 9176222  | 9275140  | SJC_S001019 | 285    | 106908 | -  | Sjp_0071590.1 | NA                            | NA       |
| HSB10kb_1019 | 5     | 9176222  | 9275140  | SJC_S001019 | 285    | 106908 | -  | Sjp_0071600.1 | binding                       | 0.052762 |
| EBR10kb_455  | "5,5" | NA       | NA       | SJC_S001019 | 106909 | 133428 | NA | Sjp_0071600.1 | binding                       | 0.052762 |
| EBR10kb_455  | "5,5" | NA       | NA       | SJC_S001019 | 106909 | 133428 | NA | Sjp_0071620.1 | NA                            | NA       |
| HSB10kb_1020 | 5     | 9096491  | 9156582  | SJC_S001019 | 133429 | 201093 | +  | Sjp_0071620.1 | NA                            | NA       |
| HSB10kb_1020 | 5     | 9096491  | 9156582  | SJC_S001019 | 133429 | 201093 | +  | Sjp_0071630.1 | NA                            | NA       |
| EBR10kb_456  | "5,5" | NA       | NA       | SJC_S001019 | 201094 | 215916 | NA | Sjp_0071640.1 | NA                            | NA       |
| EBR10kb_456  | "5,5" | NA       | NA       | SJC_S001019 | 201094 | 215916 | NA | Sjp_0071650.1 | cell part                     | 0.009037 |
| HSB10kb_1021 | 5     | 8959492  | 8970240  | SJC_S001019 | 215917 | 226300 | +  | Sjp_0071650.1 | cell part                     | 0.009037 |

|              |       |          |          |             |        |        |    |               |                                               |          |
|--------------|-------|----------|----------|-------------|--------|--------|----|---------------|-----------------------------------------------|----------|
| EBR10kb_457  | "5,5" | NA       | NA       | SJC_S001019 | 226301 | 231398 | NA | Sjp_0071660.1 | biological regulation                         | 0.76396  |
| HSB10kb_1022 | 5     | 8985443  | 9042191  | SJC_S001019 | 231399 | 274221 | -  | Sjp_0071660.1 | biological regulation                         | 0.76396  |
| HSB10kb_1022 | 5     | 8985443  | 9042191  | SJC_S001019 | 231399 | 274221 | -  | Sjp_0071670.1 | NA                                            | NA       |
| EBR10kb_458  | "5,5" | NA       | NA       | SJC_S001019 | 274222 | 297342 | NA | Sjp_0071680.1 | cell part                                     | 0.009037 |
| HSB10kb_1023 | 5     | 8890164  | 8914279  | SJC_S001019 | 297343 | 311607 | -  | Sjp_0071680.1 | cell part                                     | 0.009037 |
| HSB10kb_1023 | 5     | 8890164  | 8914279  | SJC_S001019 | 297343 | 311607 | -  | Sjp_0071690.1 | NA                                            | NA       |
| HSB10kb_1024 | 2     | 17896295 | 17951871 | SJC_S001020 | 100124 | 169230 | -  | Sjp_0071700.1 | NA                                            | NA       |
| HSB10kb_1024 | 2     | 17896295 | 17951871 | SJC_S001020 | 100124 | 169230 | -  | Sjp_0071710.1 | NA                                            | NA       |
| unknown      | NA    | NA       | NA       | SJC_S001020 | NA     | NA     | NA | Sjp_0071720.1 | binding                                       | 0.052762 |
| unknown      | NA    | NA       | NA       | SJC_S001020 | NA     | NA     | NA | Sjp_0071730.1 | NA                                            | NA       |
| unknown      | NA    | NA       | NA       | SJC_S001020 | NA     | NA     | NA | Sjp_0071740.1 | NA                                            | NA       |
| unknown      | NA    | NA       | NA       | SJC_S001020 | NA     | NA     | NA | Sjp_0071750.1 | NA                                            | NA       |
| unknown      | NA    | NA       | NA       | SJC_S001021 | NA     | NA     | NA | Sjp_0071760.1 | NA                                            | NA       |
| unknown      | NA    | NA       | NA       | SJC_S001021 | NA     | NA     | NA | Sjp_0071770.1 | NA                                            | NA       |
| HSB10kb_1025 | 2     | 24957700 | 24975266 | SJC_S001021 | 172481 | 201226 | -  | Sjp_0071780.1 | NA                                            | NA       |
| unknown      | NA    | NA       | NA       | SJC_S001022 | NA     | NA     | NA | Sjp_0071790.1 | binding                                       | 0.052762 |
| HSB10kb_1026 | 4     | 18658566 | 18676306 | SJC_S001022 | 39213  | 53375  | +  | Sjp_0071800.1 | catalytic activity                            | 0.035844 |
| EBR10kb_459  | "4,4" | NA       | NA       | SJC_S001022 | 53376  | 76964  | NA | Sjp_0071810.1 | catalytic activity                            | 0.035844 |
| HSB10kb_1027 | 4     | 11318587 | 11361558 | SJC_S001022 | 76965  | 122313 | -  | Sjp_0071820.1 | cellular process                              | 0.63852  |
| unknown      | NA    | NA       | NA       | SJC_S001022 | NA     | NA     | NA | Sjp_0071830.1 | NA                                            | NA       |
| HSB10kb_1028 | 1     | 37037776 | 37054721 | SJC_S001023 | 50682  | 64214  | +  | Sjp_0071850.1 | transporter activity                          | 0.782    |
| EBR10kb_460  | "1,1" | NA       | NA       | SJC_S001023 | 64215  | 93895  | NA | Sjp_0071850.1 | transporter activity                          | 0.782    |
| EBR10kb_460  | "1,1" | NA       | NA       | SJC_S001023 | 64215  | 93895  | NA | Sjp_0071860.1 | catalytic activity                            | 0.035844 |
| HSB10kb_1029 | 1     | 36905428 | 37023743 | SJC_S001023 | 93896  | 178070 | -  | Sjp_0071860.1 | catalytic activity                            | 0.035844 |
| HSB10kb_1029 | 1     | 36905428 | 37023743 | SJC_S001023 | 93896  | 178070 | -  | Sjp_0071870.1 | protein binding transcription factor activity | NA       |
| HSB10kb_1029 | 1     | 36905428 | 37023743 | SJC_S001023 | 93896  | 178070 | -  | Sjp_0071880.1 | NA                                            | NA       |
| HSB10kb_1030 | 1     | 10279520 | 10298762 | SJC_S001024 | 4423   | 34941  | -  | Sjp_0071890.1 | NA                                            | NA       |
| HSB10kb_1030 | 1     | 10279520 | 10298762 | SJC_S001024 | 4423   | 34941  | -  | Sjp_0071900.1 | catalytic activity                            | 0.035844 |

|              |       |          |          |             |        |        |    |               |                        |          |
|--------------|-------|----------|----------|-------------|--------|--------|----|---------------|------------------------|----------|
| EBR10kb_461  | "1,1" | NA       | NA       | SJC_S001024 | 34942  | 123466 | NA | Sjp_0071900.1 | catalytic activity     | 0.035844 |
| EBR10kb_461  | "1,1" | NA       | NA       | SJC_S001024 | 34942  | 123466 | NA | Sjp_0071910.1 | cell part              | 0.009037 |
| EBR10kb_461  | "1,1" | NA       | NA       | SJC_S001024 | 34942  | 123466 | NA | Sjp_0071920.1 | NA                     | NA       |
| HSB10kb_1031 | 1     | 10228655 | 10246281 | SJC_S001024 | 123467 | 146042 | +  | Sjp_0071920.1 | NA                     | NA       |
| EBR10kb_462  | "1,1" | NA       | NA       | SJC_S001024 | 146043 | 188439 | NA | Sjp_0071920.1 | NA                     | NA       |
| EBR10kb_462  | "1,1" | NA       | NA       | SJC_S001024 | 146043 | 188439 | NA | Sjp_0071930.1 | NA                     | NA       |
| EBR10kb_462  | "1,1" | NA       | NA       | SJC_S001024 | 146043 | 188439 | NA | Sjp_0071940.1 | cell part              | 0.009037 |
| HSB10kb_1032 | 1     | 10510608 | 10561088 | SJC_S001024 | 188440 | 276989 | +  | Sjp_0071940.1 | cell part              | 0.009037 |
| HSB10kb_1032 | 1     | 10510608 | 10561088 | SJC_S001024 | 188440 | 276989 | +  | Sjp_0071950.1 | multi-organism process | NA       |
| HSB10kb_1032 | 1     | 10510608 | 10561088 | SJC_S001024 | 188440 | 276989 | +  | Sjp_0071960.1 | catalytic activity     | 0.035844 |
| HSB10kb_1033 | 3     | 26497747 | 26611948 | SJC_S001025 | 105649 | 205559 | -  | Sjp_0071970.1 | NA                     | NA       |
| HSB10kb_1033 | 3     | 26497747 | 26611948 | SJC_S001025 | 105649 | 205559 | -  | Sjp_0071980.1 | catalytic activity     | 0.035844 |
| HSB10kb_1034 | WZ    | 18525368 | 18580871 | SJC_S001026 | 7457   | 45047  | +  | Sjp_0071990.1 | NA                     | NA       |
| HSB10kb_1034 | WZ    | 18525368 | 18580871 | SJC_S001026 | 7457   | 45047  | +  | Sjp_0072000.1 | biological regulation  | 0.76396  |
| HSB10kb_1034 | WZ    | 18525368 | 18580871 | SJC_S001026 | 7457   | 45047  | +  | Sjp_0072010.1 | catalytic activity     | 0.035844 |
| unknown      | NA    | NA       | NA       | SJC_S001027 | NA     | NA     | NA | Sjp_0072020.1 | NA                     | NA       |
| HSB10kb_1035 | WZ    | 48246869 | 48258246 | SJC_S001027 | 42071  | 52188  |    | NA            | NA                     | NA       |
| unknown      | NA    | NA       | NA       | SJC_S001027 | NA     | NA     | NA | Sjp_0072030.1 | NA                     | NA       |
| unknown      | NA    | NA       | NA       | SJC_S001027 | NA     | NA     | NA | Sjp_0072040.1 | cellular process       | 0.63852  |
| HSB10kb_1036 | 7     | 9393223  | 9712741  | SJC_S001028 | 437    | 116143 | -  | Sjp_0072050.1 | NA                     | NA       |
| HSB10kb_1036 | 7     | 9393223  | 9712741  | SJC_S001028 | 437    | 116143 | -  | Sjp_0072070.1 | cellular process       | 0.63852  |
| HSB10kb_1037 | 1     | 42869809 | 42881767 | SJC_S001029 | 1005   | 25404  | -  | Sjp_0072080.1 | NA                     | NA       |
| HSB10kb_1037 | 1     | 42869809 | 42881767 | SJC_S001029 | 1005   | 25404  | -  | Sjp_0072090.1 | cell part              | 0.009037 |
| HSB10kb_1037 | 1     | 42869809 | 42881767 | SJC_S001029 | 1005   | 25404  | -  | Sjp_0072100.1 | cell part              | 0.009037 |
| EBR10kb_463  | "1,1" | NA       | NA       | SJC_S001029 | 25405  | 40792  | NA | Sjp_0072100.1 | cell part              | 0.009037 |
| EBR10kb_463  | "1,1" | NA       | NA       | SJC_S001029 | 25405  | 40792  | NA | Sjp_0072110.1 | cell part              | 0.009037 |
| HSB10kb_1038 | 1     | 12279809 | 12320223 | SJC_S001029 | 40793  | 74751  | +  | Sjp_0072110.1 | cell part              | 0.009037 |
| HSB10kb_1038 | 1     | 12279809 | 12320223 | SJC_S001029 | 40793  | 74751  | +  | Sjp_0072120.1 | NA                     | NA       |
| unknown      | NA    | NA       | NA       | SJC_S001030 | NA     | NA     | NA | Sjp_0072130.1 | macromolecular complex | NA       |
| unknown      | NA    | NA       | NA       | SJC_S001031 | NA     | NA     | NA | Sjp_0072140.1 | cellular component     | NA       |

|              |    |          |          |             |       |        |    |               |                            |          |
|--------------|----|----------|----------|-------------|-------|--------|----|---------------|----------------------------|----------|
|              |    |          |          |             |       |        |    |               | organization or biogenesis |          |
| unknown      | NA | NA       | NA       | SJC_S001031 | NA    | NA     | NA | Sjp_0072160.1 | biological regulation      | 0.76396  |
| unknown      | NA | NA       | NA       | SJC_S001031 | NA    | NA     | NA | Sjp_0072170.1 | NA                         | NA       |
| unknown      | NA | NA       | NA       | SJC_S001031 | NA    | NA     | NA | Sjp_0072180.1 | NA                         | NA       |
| unknown      | NA | NA       | NA       | SJC_S001031 | NA    | NA     | NA | Sjp_0072190.1 | cell part                  | 0.009037 |
| unknown      | NA | NA       | NA       | SJC_S001031 | NA    | NA     | NA | Sjp_0072200.1 | localization               | NA       |
| unknown      | NA | NA       | NA       | SJC_S001031 | NA    | NA     | NA | Sjp_0072210.1 | metabolic process          | 0.41934  |
| unknown      | NA | NA       | NA       | SJC_S001031 | NA    | NA     | NA | Sjp_0072220.1 | NA                         | NA       |
| unknown      | NA | NA       | NA       | SJC_S001032 | NA    | NA     | NA | Sjp_0072230.1 | NA                         | NA       |
| unknown      | NA | NA       | NA       | SJC_S001033 | NA    | NA     | NA | Sjp_0072240.1 | cell part                  | 0.009037 |
| HSB10kb_1039 | 3  | 17153880 | 17276589 | SJC_S001033 | 80864 | 193189 | +  | Sjp_0072250.1 | NA                         | NA       |
| HSB10kb_1039 | 3  | 17153880 | 17276589 | SJC_S001033 | 80864 | 193189 | +  | Sjp_0072260.1 | NA                         | NA       |
| HSB10kb_1039 | 3  | 17153880 | 17276589 | SJC_S001033 | 80864 | 193189 | +  | Sjp_0072270.1 | NA                         | NA       |
| HSB10kb_1039 | 3  | 17153880 | 17276589 | SJC_S001033 | 80864 | 193189 | +  | Sjp_0072280.1 | catalytic activity         | 0.035844 |
| HSB10kb_1039 | 3  | 17153880 | 17276589 | SJC_S001033 | 80864 | 193189 | +  | Sjp_0072290.1 | NA                         | NA       |
| HSB10kb_1039 | 3  | 17153880 | 17276589 | SJC_S001033 | 80864 | 193189 | +  | Sjp_0072300.1 | NA                         | NA       |
| HSB10kb_1039 | 3  | 17153880 | 17276589 | SJC_S001033 | 80864 | 193189 | +  | Sjp_0072320.1 | NA                         | NA       |
| HSB10kb_1039 | 3  | 17153880 | 17276589 | SJC_S001033 | 80864 | 193189 | +  | Sjp_0072330.1 | NA                         | NA       |
| unknown      | NA | NA       | NA       | SJC_S001033 | NA    | NA     | NA | Sjp_0072340.1 | NA                         | NA       |
| HSB10kb_1040 | 6  | 9750325  | 9798054  | SJC_S001034 | 23380 | 53369  | +  | Sjp_0072350.1 | NA                         | NA       |
| HSB10kb_1040 | 6  | 9750325  | 9798054  | SJC_S001034 | 23380 | 53369  | +  | Sjp_0072360.1 | NA                         | NA       |
| unknown      | NA | NA       | NA       | SJC_S001034 | NA    | NA     | NA | Sjp_0072370.1 | NA                         | NA       |
| HSB10kb_1041 | WZ | 56914830 | 57399889 | SJC_S001036 | 15084 | 292458 | -  | Sjp_0072380.1 | NA                         | NA       |
| HSB10kb_1041 | WZ | 56914830 | 57399889 | SJC_S001036 | 15084 | 292458 | -  | Sjp_0072390.1 | NA                         | NA       |
| HSB10kb_1041 | WZ | 56914830 | 57399889 | SJC_S001036 | 15084 | 292458 | -  | Sjp_0072400.1 | NA                         | NA       |
| HSB10kb_1041 | WZ | 56914830 | 57399889 | SJC_S001036 | 15084 | 292458 | -  | Sjp_0072410.1 | NA                         | NA       |
| HSB10kb_1041 | WZ | 56914830 | 57399889 | SJC_S001036 | 15084 | 292458 | -  | Sjp_0072420.1 | cell part                  | 0.009037 |
| HSB10kb_1041 | WZ | 56914830 | 57399889 | SJC_S001036 | 15084 | 292458 | -  | Sjp_0072430.1 | NA                         | NA       |
| HSB10kb_1041 | WZ | 56914830 | 57399889 | SJC_S001036 | 15084 | 292458 | -  | Sjp_0072440.1 | NA                         | NA       |
| HSB10kb_1041 | WZ | 56914830 | 57399889 | SJC_S001036 | 15084 | 292458 | -  | Sjp_0072450.1 | NA                         | NA       |
| HSB10kb_1041 | WZ | 56914830 | 57399889 | SJC_S001036 | 15084 | 292458 | -  | Sjp_0072470.1 | catalytic activity         | 0.035844 |

|              |       |          |          |             |       |       |    |               |                               |          |
|--------------|-------|----------|----------|-------------|-------|-------|----|---------------|-------------------------------|----------|
| HSB10kb_1042 | 6     | 15049803 | 15063977 | SJC_S001037 | 22995 | 43164 |    | Sjp_0072480.1 | cell part                     | 0.009037 |
| HSB10kb_1042 | 6     | 15049803 | 15063977 | SJC_S001037 | 22995 | 43164 |    | Sjp_0072490.1 | NA                            | NA       |
| unknown      | NA    | NA       | NA       | SJC_S001038 | NA    | NA    | NA | Sjp_0072500.1 | NA                            | NA       |
| HSB10kb_1043 | 1     | 14271473 | 14290944 | SJC_S001038 | 16437 | 32777 | +  | Sjp_0072510.1 | NA                            | NA       |
| HSB10kb_1043 | 1     | 14271473 | 14290944 | SJC_S001038 | 16437 | 32777 | +  | Sjp_0072520.1 | establishment of localization | NA       |
| HSB10kb_1043 | 1     | 14271473 | 14290944 | SJC_S001038 | 16437 | 32777 | +  | Sjp_0072530.1 | establishment of localization | NA       |
| unknown      | NA    | NA       | NA       | SJC_S001038 | NA    | NA    | NA | Sjp_0072540.1 | establishment of localization | NA       |
| HSB10kb_1044 | WZ    | 6423578  | 6520831  | SJC_S001039 | 6699  | 94475 | -  | Sjp_0072550.1 | NA                            | NA       |
| HSB10kb_1044 | WZ    | 6423578  | 6520831  | SJC_S001039 | 6699  | 94475 | -  | Sjp_0072560.1 | cell part                     | 0.009037 |
| HSB10kb_1044 | WZ    | 6423578  | 6520831  | SJC_S001039 | 6699  | 94475 | -  | Sjp_0072570.1 | NA                            | NA       |
| unknown      | NA    | NA       | NA       | SJC_S001040 | NA    | NA    | NA | Sjp_0072580.1 | NA                            | NA       |
| HSB10kb_1045 | 7     | 3941106  | 3963387  | SJC_S001040 | 46872 | 74540 | +  | Sjp_0072590.1 | NA                            | NA       |
| unknown      | NA    | NA       | NA       | SJC_S001040 | NA    | NA    | NA | Sjp_0072600.1 | NA                            | NA       |
| unknown      | NA    | NA       | NA       | SJC_S001041 | NA    | NA    | NA | Sjp_0072610.1 | NA                            | NA       |
| unknown      | NA    | NA       | NA       | SJC_S001041 | NA    | NA    | NA | Sjp_0072620.1 | NA                            | NA       |
| HSB10kb_1046 | 7     | 4275186  | 4304310  | SJC_S001041 | 33951 | 62761 |    | NA            | NA                            | NA       |
| unknown      | NA    | NA       | NA       | SJC_S001042 | NA    | NA    | NA | Sjp_0072630.1 | NA                            | NA       |
| unknown      | NA    | NA       | NA       | SJC_S001042 | NA    | NA    | NA | Sjp_0072640.1 | NA                            | NA       |
| unknown      | NA    | NA       | NA       | SJC_S001042 | NA    | NA    | NA | Sjp_0072650.1 | binding                       | 0.052762 |
| unknown      | NA    | NA       | NA       | SJC_S001043 | NA    | NA    | NA | Sjp_0072660.1 | NA                            | NA       |
| unknown      | NA    | NA       | NA       | SJC_S001044 | NA    | NA    | NA | Sjp_0072670.1 | NA                            | NA       |
| HSB10kb_1047 | 2     | 8585801  | 8658012  | SJC_S001044 | 11949 | 48159 | -  | Sjp_0072680.1 | reproductive process          | NA       |
| HSB10kb_1047 | 2     | 8585801  | 8658012  | SJC_S001044 | 11949 | 48159 | -  | Sjp_0072690.1 | binding                       | 0.052762 |
| EBR10kb_464  | "2,2" | NA       | NA       | SJC_S001044 | 48160 | 70707 | NA | Sjp_0072700.1 | NA                            | NA       |
| HSB10kb_1048 | 2     | 8670556  | 8694556  | SJC_S001044 | 70708 | 84217 | +  | Sjp_0072700.1 | NA                            | NA       |
| unknown      | NA    | NA       | NA       | SJC_S001045 | NA    | NA    | NA | Sjp_0072710.1 | cellular process              | 0.63852  |
| HSB10kb_1049 | WZ    | 17292356 | 17311555 | SJC_S001045 | 22406 | 37464 | -  | Sjp_0072720.1 | NA                            | NA       |
| unknown      | NA    | NA       | NA       | SJC_S001046 | NA    | NA    | NA | Sjp_0072730.1 | NA                            | NA       |
| unknown      | NA    | NA       | NA       | SJC_S001047 | NA    | NA    | NA | Sjp_0072740.1 | NA                            | NA       |
| unknown      | NA    | NA       | NA       | SJC_S001047 | NA    | NA    | NA | Sjp_0072750.1 | NA                            | NA       |

|              |    |          |          |             |       |       |    |               |                                               |          |
|--------------|----|----------|----------|-------------|-------|-------|----|---------------|-----------------------------------------------|----------|
| unknown      | NA | NA       | NA       | SJC_S001048 | NA    | NA    | NA | Sjp_0072760.1 | NA                                            | NA       |
| unknown      | NA | NA       | NA       | SJC_S001048 | NA    | NA    | NA | Sjp_0072770.1 | NA                                            | NA       |
| unknown      | NA | NA       | NA       | SJC_S001049 | NA    | NA    | NA | Sjp_0072780.1 | NA                                            | NA       |
| HSB10kb_1050 | 1  | 28607283 | 28661871 | SJC_S001050 | 13024 | 49480 | +  | Sjp_0072790.1 | biological regulation                         | 0.76396  |
| HSB10kb_1050 | 1  | 28607283 | 28661871 | SJC_S001050 | 13024 | 49480 | +  | Sjp_0072800.1 | NA                                            | NA       |
| HSB10kb_1050 | 1  | 28607283 | 28661871 | SJC_S001050 | 13024 | 49480 | +  | Sjp_0072810.1 | NA                                            | NA       |
| HSB10kb_1051 | 3  | 7192461  | 7210659  | SJC_S001051 | 45874 | 69212 | -  | Sjp_0072820.1 | NA                                            | NA       |
| HSB10kb_1051 | 3  | 7192461  | 7210659  | SJC_S001051 | 45874 | 69212 | -  | Sjp_0072830.1 | biological regulation                         | 0.76396  |
| unknown      | NA | NA       | NA       | SJC_S001051 | NA    | NA    | NA | Sjp_0072840.1 | binding                                       | 0.052762 |
| unknown      | NA | NA       | NA       | SJC_S001052 | NA    | NA    | NA | Sjp_0072850.1 | binding                                       | 0.052762 |
| unknown      | NA | NA       | NA       | SJC_S001052 | NA    | NA    | NA | Sjp_0072860.1 | metabolic process                             | 0.41934  |
| unknown      | NA | NA       | NA       | SJC_S001054 | NA    | NA    | NA | Sjp_0072870.1 | NA                                            | NA       |
| unknown      | NA | NA       | NA       | SJC_S001055 | NA    | NA    | NA | Sjp_0072880.1 | NA                                            | NA       |
| unknown      | NA | NA       | NA       | SJC_S001055 | NA    | NA    | NA | Sjp_0072890.1 | catalytic activity                            | 0.035844 |
| unknown      | NA | NA       | NA       | SJC_S001056 | NA    | NA    | NA | Sjp_0072900.1 | molecular transducer activity                 | 0.50162  |
| unknown      | NA | NA       | NA       | SJC_S001056 | NA    | NA    | NA | Sjp_0072910.1 | NA                                            | NA       |
| unknown      | NA | NA       | NA       | SJC_S001056 | NA    | NA    | NA | Sjp_0072920.1 | NA                                            | NA       |
| unknown      | NA | NA       | NA       | SJC_S001058 | NA    | NA    | NA | Sjp_0072930.1 | metabolic process                             | 0.41934  |
| unknown      | NA | NA       | NA       | SJC_S001059 | NA    | NA    | NA | Sjp_0072940.1 | NA                                            | NA       |
| unknown      | NA | NA       | NA       | SJC_S001060 | NA    | NA    | NA | Sjp_0072950.1 | NA                                            | NA       |
| unknown      | NA | NA       | NA       | SJC_S001060 | NA    | NA    | NA | Sjp_0072960.1 | NA                                            | NA       |
| unknown      | NA | NA       | NA       | SJC_S001060 | NA    | NA    | NA | Sjp_0072970.1 | cellular component organization or biogenesis | NA       |
| unknown      | NA | NA       | NA       | SJC_S001061 | NA    | NA    | NA | Sjp_0072980.1 | cell part                                     | 0.009037 |
| unknown      | NA | NA       | NA       | SJC_S001062 | NA    | NA    | NA | Sjp_0072990.1 | NA                                            | NA       |
| unknown      | NA | NA       | NA       | SJC_S001062 | NA    | NA    | NA | Sjp_0073000.1 | NA                                            | NA       |



|              |    |          |          |             |       |       |    |               |                                               |          |
|--------------|----|----------|----------|-------------|-------|-------|----|---------------|-----------------------------------------------|----------|
| unknown      | NA | NA       | NA       | SJC_S001062 | NA    | NA    | NA | Sjp_0073010.1 | NA                                            | NA       |
| unknown      | NA | NA       | NA       | SJC_S001063 | NA    | NA    | NA | Sjp_0073020.1 | NA                                            | NA       |
| HSB10kb_1052 | WZ | 47680318 | 47703551 | SJC_S001066 | 5333  | 22918 | +  | Sjp_0073030.1 | NA                                            | NA       |
| unknown      | NA | NA       | NA       | SJC_S001067 | NA    | NA    | NA | Sjp_0073040.1 | catalytic activity                            | 0.035844 |
| HSB10kb_1053 | 1  | 40022388 | 40038240 | SJC_S001067 | 27977 | 39582 | -  | Sjp_0073050.1 | NA                                            | NA       |
| unknown      | NA | NA       | NA       | SJC_S001068 | NA    | NA    | NA | Sjp_0073060.1 | NA                                            | NA       |
| unknown      | NA | NA       | NA       | SJC_S001068 | NA    | NA    | NA | Sjp_0073070.1 | NA                                            | NA       |
| unknown      | NA | NA       | NA       | SJC_S001068 | NA    | NA    | NA | Sjp_0073080.1 | NA                                            | NA       |
| unknown      | NA | NA       | NA       | SJC_S001069 | NA    | NA    | NA | Sjp_0073090.1 | NA                                            | NA       |
| unknown      | NA | NA       | NA       | SJC_S001069 | NA    | NA    | NA | Sjp_0073100.1 | cellular component organization or biogenesis | NA       |
| unknown      | NA | NA       | NA       | SJC_S001070 | NA    | NA    | NA | Sjp_0073110.1 | NA                                            | NA       |
| HSB10kb_1054 | 3  | 27685728 | 27791003 | SJC_S001070 | 18099 | 56849 | -  | Sjp_0073130.1 | NA                                            | NA       |
| HSB10kb_1054 | 3  | 27685728 | 27791003 | SJC_S001070 | 18099 | 56849 | -  | Sjp_0073140.1 | NA                                            | NA       |
| unknown      | NA | NA       | NA       | SJC_S001072 | NA    | NA    | NA | Sjp_0073150.1 | NA                                            | NA       |
| unknown      | NA | NA       | NA       | SJC_S001073 | NA    | NA    | NA | Sjp_0073160.1 | NA                                            | NA       |
| unknown      | NA | NA       | NA       | SJC_S001073 | NA    | NA    | NA | Sjp_0073170.1 | NA                                            | NA       |
| unknown      | NA | NA       | NA       | SJC_S001074 | NA    | NA    | NA | Sjp_0073180.1 | transporter activity                          | 0.782    |
| unknown      | NA | NA       | NA       | SJC_S001074 | NA    | NA    | NA | Sjp_0073190.1 | NA                                            | NA       |
| unknown      | NA | NA       | NA       | SJC_S001074 | NA    | NA    | NA | Sjp_0073200.1 | NA                                            | NA       |
| unknown      | NA | NA       | NA       | SJC_S001075 | NA    | NA    | NA | Sjp_0073210.1 | NA                                            | NA       |
| unknown      | NA | NA       | NA       | SJC_S001075 | NA    | NA    | NA | Sjp_0073220.1 | NA                                            | NA       |
| unknown      | NA | NA       | NA       | SJC_S001077 | NA    | NA    | NA | Sjp_0073230.1 | NA                                            | NA       |
| HSB10kb_1055 | 6  | 8962205  | 9003858  | SJC_S001078 | 6072  | 43958 | -  | Sjp_0073240.1 | NA                                            | NA       |
| unknown      | NA | NA       | NA       | SJC_S001080 | NA    | NA    | NA | Sjp_0073250.1 | NA                                            | NA       |
| unknown      | NA | NA       | NA       | SJC_S001082 | NA    | NA    | NA | Sjp_0073260.1 | NA                                            | NA       |
| HSB10kb_1056 | 4  | 6533882  | 6548614  | SJC_S001082 | 11175 | 22893 | -  | Sjp_0073270.1 | catalytic activity                            | 0.035844 |
| HSB10kb_1056 | 4  | 6533882  | 6548614  | SJC_S001082 | 11175 | 22893 | -  | Sjp_0073280.1 | catalytic activity                            | 0.035844 |
| HSB10kb_1056 | 4  | 6533882  | 6548614  | SJC_S001082 | 11175 | 22893 | -  | Sjp_0073290.1 | catalytic activity                            | 0.035844 |
| unknown      | NA | NA       | NA       | SJC_S001082 | NA    | NA    | NA | Sjp_0073300.1 | NA                                            | NA       |
| unknown      | NA | NA       | NA       | SJC_S001083 | NA    | NA    | NA | Sjp_0073310.1 | binding                                       | 0.052762 |

|              |    |          |          |             |       |       |    |               |                    |          |
|--------------|----|----------|----------|-------------|-------|-------|----|---------------|--------------------|----------|
| unknown      | NA | NA       | NA       | SJC_S001084 | NA    | NA    | NA | Sjp_0073320.1 | cell part          | 0.009037 |
| HSB10kb_1057 | 1  | 1800352  | 1870986  | SJC_S001085 | 2864  | 46250 | -  | Sjp_0073340.1 | NA                 | NA       |
| HSB10kb_1057 | 1  | 1800352  | 1870986  | SJC_S001085 | 2864  | 46250 | -  | Sjp_0073350.1 | NA                 | NA       |
| unknown      | NA | NA       | NA       | SJC_S001086 | NA    | NA    | NA | Sjp_0073360.1 | NA                 | NA       |
| unknown      | NA | NA       | NA       | SJC_S001087 | NA    | NA    | NA | Sjp_0073370.1 | NA                 | NA       |
| unknown      | NA | NA       | NA       | SJC_S001090 | NA    | NA    | NA | Sjp_0073380.1 | NA                 | NA       |
| unknown      | NA | NA       | NA       | SJC_S001091 | NA    | NA    | NA | Sjp_0073390.1 | NA                 | NA       |
| HSB10kb_1058 | 2  | 14441987 | 14459690 | SJC_S001091 | 19697 | 35019 | +  | Sjp_0073400.1 | cell part          | 0.009037 |
| unknown      | NA | NA       | NA       | SJC_S001094 | NA    | NA    | NA | Sjp_0073410.1 | binding            | 0.052762 |
| unknown      | NA | NA       | NA       | SJC_S001094 | NA    | NA    | NA | Sjp_0073420.1 | NA                 | NA       |
| unknown      | NA | NA       | NA       | SJC_S001094 | NA    | NA    | NA | Sjp_0073430.1 | NA                 | NA       |
| unknown      | NA | NA       | NA       | SJC_S001094 | NA    | NA    | NA | Sjp_0073440.1 | NA                 | NA       |
| unknown      | NA | NA       | NA       | SJC_S001095 | NA    | NA    | NA | Sjp_0073450.1 | NA                 | NA       |
| unknown      | NA | NA       | NA       | SJC_S001099 | NA    | NA    | NA | Sjp_0073460.1 | NA                 | NA       |
| unknown      | NA | NA       | NA       | SJC_S001100 | NA    | NA    | NA | Sjp_0073470.1 | NA                 | NA       |
| unknown      | NA | NA       | NA       | SJC_S001102 | NA    | NA    | NA | Sjp_0073490.1 | catalytic activity | 0.035844 |
| unknown      | NA | NA       | NA       | SJC_S001103 | NA    | NA    | NA | Sjp_0073500.1 | metabolic process  | 0.41934  |
| unknown      | NA | NA       | NA       | SJC_S001103 | NA    | NA    | NA | Sjp_0073510.1 | NA                 | NA       |
| unknown      | NA | NA       | NA       | SJC_S001103 | NA    | NA    | NA | Sjp_0073520.1 | NA                 | NA       |
| unknown      | NA | NA       | NA       | SJC_S001104 | NA    | NA    | NA | Sjp_0073530.1 | binding            | 0.052762 |
| unknown      | NA | NA       | NA       | SJC_S001104 | NA    | NA    | NA | Sjp_0073540.1 | NA                 | NA       |
| unknown      | NA | NA       | NA       | SJC_S001104 | NA    | NA    | NA | Sjp_0073550.1 | NA                 | NA       |
| unknown      | NA | NA       | NA       | SJC_S001104 | NA    | NA    | NA | Sjp_0073560.1 | binding            | 0.052762 |
| unknown      | NA | NA       | NA       | SJC_S001105 | NA    | NA    | NA | Sjp_0073570.1 | NA                 | NA       |
| unknown      | NA | NA       | NA       | SJC_S001106 | NA    | NA    | NA | Sjp_0073580.1 | cell part          | 0.009037 |
| unknown      | NA | NA       | NA       | SJC_S001106 | NA    | NA    | NA | Sjp_0073590.1 | catalytic activity | 0.035844 |
| unknown      | NA | NA       | NA       | SJC_S001109 | NA    | NA    | NA | Sjp_0073600.1 | NA                 | NA       |
| unknown      | NA | NA       | NA       | SJC_S001109 | NA    | NA    | NA | Sjp_0073610.1 | NA                 | NA       |
| unknown      | NA | NA       | NA       | SJC_S001113 | NA    | NA    | NA | Sjp_0073620.1 | NA                 | NA       |
| unknown      | NA | NA       | NA       | SJC_S001114 | NA    | NA    | NA | Sjp_0073630.1 | NA                 | NA       |
| HSB10kb_1059 | 1  | 49558643 | 49596230 | SJC_S001115 | 1     | 36572 | +  | NA            | NA                 | NA       |
| unknown      | NA | NA       | NA       | SJC_S001117 | NA    | NA    | NA | Sjp_0073650.1 | cellular process   | 0.63852  |
| unknown      | NA | NA       | NA       | SJC_S001117 | NA    | NA    | NA | Sjp_0073660.1 | catalytic activity | 0.035844 |

|              |    |          |          |             |       |       |    |               |                                               |          |
|--------------|----|----------|----------|-------------|-------|-------|----|---------------|-----------------------------------------------|----------|
| unknown      | NA | NA       | NA       | SJC_S001117 | NA    | NA    | NA | Sjp_0073670.1 | catalytic activity                            | 0.035844 |
| HSB10kb_1060 | 1  | 15355904 | 15371481 | SJC_S001118 | 7873  | 23117 | -  | Sjp_0073680.1 | molecular transducer activity                 | 0.50162  |
| unknown      | NA | NA       | NA       | SJC_S001119 | NA    | NA    | NA | Sjp_0073690.1 | NA                                            | NA       |
| unknown      | NA | NA       | NA       | SJC_S001120 | NA    | NA    | NA | Sjp_0073700.1 | enzyme regulator activity                     | 0.1755   |
| unknown      | NA | NA       | NA       | SJC_S001120 | NA    | NA    | NA | Sjp_0073710.1 | biological regulation                         | 0.76396  |
| unknown      | NA | NA       | NA       | SJC_S001120 | NA    | NA    | NA | Sjp_0073720.1 | enzyme regulator activity                     | 0.1755   |
| unknown      | NA | NA       | NA       | SJC_S001121 | NA    | NA    | NA | Sjp_0073730.1 | NA                                            | NA       |
| unknown      | NA | NA       | NA       | SJC_S001121 | NA    | NA    | NA | Sjp_0073740.1 | biological regulation                         | 0.76396  |
| unknown      | NA | NA       | NA       | SJC_S001123 | NA    | NA    | NA | Sjp_0073750.1 | NA                                            | NA       |
| HSB10kb_1061 | 4  | 9257757  | 9287624  | SJC_S001124 | 10347 | 27583 | +  | Sjp_0073760.1 | cell part                                     | 0.009037 |
| HSB10kb_1061 | 4  | 9257757  | 9287624  | SJC_S001124 | 10347 | 27583 | +  | Sjp_0073770.1 | NA                                            | NA       |
| unknown      | NA | NA       | NA       | SJC_S001125 | NA    | NA    | NA | Sjp_0073780.1 | NA                                            | NA       |
| unknown      | NA | NA       | NA       | SJC_S001125 | NA    | NA    | NA | Sjp_0073790.1 | NA                                            | NA       |
| HSB10kb_1062 | WZ | 19380823 | 19394081 | SJC_S001126 | 753   | 22870 | +  | Sjp_0073800.1 | catalytic activity                            | 0.035844 |
| unknown      | NA | NA       | NA       | SJC_S001127 | NA    | NA    | NA | Sjp_0073810.1 | NA                                            | NA       |
| unknown      | NA | NA       | NA       | SJC_S001128 | NA    | NA    | NA | Sjp_0073820.1 | response to stimulus                          | NA       |
| unknown      | NA | NA       | NA       | SJC_S001128 | NA    | NA    | NA | Sjp_0073830.1 | NA                                            | NA       |
| unknown      | NA | NA       | NA       | SJC_S001128 | NA    | NA    | NA | Sjp_0073840.1 | NA                                            | NA       |
| unknown      | NA | NA       | NA       | SJC_S001129 | NA    | NA    | NA | Sjp_0073850.1 | NA                                            | NA       |
| unknown      | NA | NA       | NA       | SJC_S001130 | NA    | NA    | NA | Sjp_0073860.1 | cellular component organization or biogenesis | NA       |
| unknown      | NA | NA       | NA       | SJC_S001131 | NA    | NA    | NA | Sjp_0073870.1 | biological regulation                         | 0.76396  |
| HSB10kb_1063 | 1  | 38441577 | 38497754 | SJC_S001132 | 2866  | 48475 | +  | Sjp_0073880.1 | NA                                            | NA       |

|              |    |          |          |             |      |       |    |               |                               |          |
|--------------|----|----------|----------|-------------|------|-------|----|---------------|-------------------------------|----------|
| HSB10kb_1064 | WZ | 34817802 | 34854892 | SJC_S001134 | 8423 | 46869 | -  | Sjp_0073890.1 | NA                            | NA       |
| HSB10kb_1064 | WZ | 34817802 | 34854892 | SJC_S001134 | 8423 | 46869 | -  | Sjp_0073900.1 | enzyme regulator activity     | 0.1755   |
| HSB10kb_1064 | WZ | 34817802 | 34854892 | SJC_S001134 | 8423 | 46869 | -  | Sjp_0073910.1 | NA                            | NA       |
| HSB10kb_1064 | WZ | 34817802 | 34854892 | SJC_S001134 | 8423 | 46869 | -  | Sjp_0073920.1 | binding                       | 0.052762 |
| unknown      | NA | NA       | NA       | SJC_S001135 | NA   | NA    | NA | Sjp_0073930.1 | catalytic activity            | 0.035844 |
| unknown      | NA | NA       | NA       | SJC_S001136 | NA   | NA    | NA | Sjp_0073940.1 | catalytic activity            | 0.035844 |
| unknown      | NA | NA       | NA       | SJC_S001137 | NA   | NA    | NA | Sjp_0073950.1 | NA                            | NA       |
| unknown      | NA | NA       | NA       | SJC_S001138 | NA   | NA    | NA | Sjp_0073960.1 | NA                            | NA       |
| unknown      | NA | NA       | NA       | SJC_S001139 | NA   | NA    | NA | Sjp_0073970.1 | NA                            | NA       |
| unknown      | NA | NA       | NA       | SJC_S001141 | NA   | NA    | NA | Sjp_0073980.1 | NA                            | NA       |
| unknown      | NA | NA       | NA       | SJC_S001142 | NA   | NA    | NA | Sjp_0073990.1 | NA                            | NA       |
| unknown      | NA | NA       | NA       | SJC_S001143 | NA   | NA    | NA | Sjp_0074000.1 | NA                            | NA       |
| unknown      | NA | NA       | NA       | SJC_S001144 | NA   | NA    | NA | Sjp_0074010.1 | biological regulation         | 0.76396  |
| unknown      | NA | NA       | NA       | SJC_S001147 | NA   | NA    | NA | Sjp_0074020.1 | NA                            | NA       |
| unknown      | NA | NA       | NA       | SJC_S001147 | NA   | NA    | NA | Sjp_0074030.1 | NA                            | NA       |
| unknown      | NA | NA       | NA       | SJC_S001148 | NA   | NA    | NA | Sjp_0074040.1 | NA                            | NA       |
| unknown      | NA | NA       | NA       | SJC_S001149 | NA   | NA    | NA | Sjp_0074050.1 | NA                            | NA       |
| unknown      | NA | NA       | NA       | SJC_S001149 | NA   | NA    | NA | Sjp_0074060.1 | NA                            | NA       |
| unknown      | NA | NA       | NA       | SJC_S001149 | NA   | NA    | NA | Sjp_0074070.1 | NA                            | NA       |
| unknown      | NA | NA       | NA       | SJC_S001150 | NA   | NA    | NA | Sjp_0074080.1 | NA                            | NA       |
| unknown      | NA | NA       | NA       | SJC_S001150 | NA   | NA    | NA | Sjp_0074090.1 | catalytic activity            | 0.035844 |
| unknown      | NA | NA       | NA       | SJC_S001150 | NA   | NA    | NA | Sjp_0074100.1 | cell part                     | 0.009037 |
| unknown      | NA | NA       | NA       | SJC_S001150 | NA   | NA    | NA | Sjp_0074110.1 | biological regulation         | 0.76396  |
| unknown      | NA | NA       | NA       | SJC_S001150 | NA   | NA    | NA | Sjp_0074120.1 | catalytic activity            | 0.035844 |
| unknown      | NA | NA       | NA       | SJC_S001150 | NA   | NA    | NA | Sjp_0074130.1 | NA                            | NA       |
| unknown      | NA | NA       | NA       | SJC_S001150 | NA   | NA    | NA | Sjp_0074140.1 | molecular transducer activity | 0.50162  |
| unknown      | NA | NA       | NA       | SJC_S001150 | NA   | NA    | NA | Sjp_0074150.1 | biological regulation         | 0.76396  |

|              |       |          |          |             |        |        |    |               |                               |          |
|--------------|-------|----------|----------|-------------|--------|--------|----|---------------|-------------------------------|----------|
| unknown      | NA    | NA       | NA       | SJC_S001150 | NA     | NA     | NA | Sjp_0074160.1 | NA                            | NA       |
| unknown      | NA    | NA       | NA       | SJC_S001150 | NA     | NA     | NA | Sjp_0074170.1 | NA                            | NA       |
| unknown      | NA    | NA       | NA       | SJC_S001150 | NA     | NA     | NA | Sjp_0074180.1 | NA                            | NA       |
| unknown      | NA    | NA       | NA       | SJC_S001150 | NA     | NA     | NA | Sjp_0074190.1 | NA                            | NA       |
| unknown      | NA    | NA       | NA       | SJC_S001150 | NA     | NA     | NA | Sjp_0074200.1 | cell part                     | 0.009037 |
| unknown      | NA    | NA       | NA       | SJC_S001151 | NA     | NA     | NA | Sjp_0074210.1 | NA                            | NA       |
| unknown      | NA    | NA       | NA       | SJC_S001151 | NA     | NA     | NA | Sjp_0074220.1 | NA                            | NA       |
| unknown      | NA    | NA       | NA       | SJC_S001151 | NA     | NA     | NA | Sjp_0074230.1 | NA                            | NA       |
| unknown      | NA    | NA       | NA       | SJC_S001151 | NA     | NA     | NA | Sjp_0074240.1 | NA                            | NA       |
| HSB10kb_1065 | WZ    | 14944480 | 15003926 | SJC_S001151 | 64588  | 95666  | +  | Sjp_0074250.1 | NA                            | NA       |
| unknown      | NA    | NA       | NA       | SJC_S001151 | NA     | NA     | NA | Sjp_0074260.1 | NA                            | NA       |
| unknown      | NA    | NA       | NA       | SJC_S001152 | NA     | NA     | NA | Sjp_0074280.1 | NA                            | NA       |
| unknown      | NA    | NA       | NA       | SJC_S001153 | NA     | NA     | NA | Sjp_0074290.1 | NA                            | NA       |
| HSB10kb_1066 | 2     | 27068733 | 27099885 | SJC_S001153 | 20945  | 77231  | -  | Sjp_0074300.1 | catalytic activity            | 0.035844 |
| HSB10kb_1066 | 2     | 27068733 | 27099885 | SJC_S001153 | 20945  | 77231  | -  | Sjp_0074310.1 | binding                       | 0.052762 |
| HSB10kb_1066 | 2     | 27068733 | 27099885 | SJC_S001153 | 20945  | 77231  | -  | Sjp_0074320.1 | NA                            | NA       |
| unknown      | NA    | NA       | NA       | SJC_S001153 | NA     | NA     | NA | Sjp_0074330.1 | NA                            | NA       |
| HSB10kb_1067 | 1     | 44411159 | 44487367 | SJC_S001154 | 13977  | 104140 | -  | Sjp_0074340.1 | biological regulation         | 0.76396  |
| HSB10kb_1067 | 1     | 44411159 | 44487367 | SJC_S001154 | 13977  | 104140 | -  | Sjp_0074350.1 | NA                            | NA       |
| EBR10kb_465  | "1,1" | NA       | NA       | SJC_S001154 | 104141 | 129607 | NA | Sjp_0074350.1 | NA                            | NA       |
| EBR10kb_465  | "1,1" | NA       | NA       | SJC_S001154 | 104141 | 129607 | NA | Sjp_0074360.1 | establishment of localization | NA       |
| HSB10kb_1068 | 1     | 35120132 | 35212248 | SJC_S001154 | 129608 | 212259 | +  | Sjp_0074360.1 | establishment of localization | NA       |
| HSB10kb_1068 | 1     | 35120132 | 35212248 | SJC_S001154 | 129608 | 212259 | +  | Sjp_0074370.1 | NA                            | NA       |
| HSB10kb_1068 | 1     | 35120132 | 35212248 | SJC_S001154 | 129608 | 212259 | +  | Sjp_0074380.1 | catalytic activity            | 0.035844 |
| unknown      | NA    | NA       | NA       | SJC_S001154 | NA     | NA     | NA | Sjp_0074390.1 | NA                            | NA       |
| unknown      | NA    | NA       | NA       | SJC_S001155 | NA     | NA     | NA | Sjp_0074400.1 | NA                            | NA       |
| HSB10kb_1069 | 1     | 22505563 | 22663088 | SJC_S001156 | 118    | 160855 | +  | Sjp_0074410.1 | NA                            | NA       |
| HSB10kb_1069 | 1     | 22505563 | 22663088 | SJC_S001156 | 118    | 160855 | +  | Sjp_0074420.1 | transporter activity          | 0.782    |
| HSB10kb_1069 | 1     | 22505563 | 22663088 | SJC_S001156 | 118    | 160855 | +  | Sjp_0074430.1 | transporter activity          | 0.782    |

|              |    |          |          |             |       |        |    |               |                                  |          |
|--------------|----|----------|----------|-------------|-------|--------|----|---------------|----------------------------------|----------|
| HSB10kb_1069 | 1  | 22505563 | 22663088 | SJC_S001156 | 118   | 160855 | +  | Sjp_0074440.1 | multicellular organismal process | NA       |
| unknown      | NA | NA       | NA       | SJC_S001157 | NA    | NA     | NA | Sjp_0074450.1 | NA                               | NA       |
| unknown      | NA | NA       | NA       | SJC_S001157 | NA    | NA     | NA | Sjp_0074460.1 | NA                               | NA       |
| unknown      | NA | NA       | NA       | SJC_S001158 | NA    | NA     | NA | Sjp_0074480.1 | NA                               | NA       |
| unknown      | NA | NA       | NA       | SJC_S001159 | NA    | NA     | NA | Sjp_0074490.1 | NA                               | NA       |
| unknown      | NA | NA       | NA       | SJC_S001159 | NA    | NA     | NA | Sjp_0074500.1 | multi-organism process           | NA       |
| HSB10kb_1070 | 1  | 35840617 | 35866730 | SJC_S001159 | 92187 | 110426 | -  | NA            | NA                               | NA       |
| HSB10kb_1071 | WZ | 31278104 | 31378825 | SJC_S001161 | 18199 | 118863 | -  | Sjp_0074520.1 | metabolic process                | 0.41934  |
| HSB10kb_1071 | WZ | 31278104 | 31378825 | SJC_S001161 | 18199 | 118863 | -  | Sjp_0074530.1 | catalytic activity               | 0.035844 |
| HSB10kb_1071 | WZ | 31278104 | 31378825 | SJC_S001161 | 18199 | 118863 | -  | Sjp_0074540.1 | molecular transducer activity    | 0.50162  |
| unknown      | NA | NA       | NA       | SJC_S001161 | NA    | NA     | NA | Sjp_0074550.1 | NA                               | NA       |
| unknown      | NA | NA       | NA       | SJC_S001162 | NA    | NA     | NA | Sjp_0074560.1 | NA                               | NA       |
| HSB10kb_1072 | WZ | 25526377 | 25557136 | SJC_S001162 | 12311 | 36870  | -  | Sjp_0074570.1 | catalytic activity               | 0.035844 |
| unknown      | NA | NA       | NA       | SJC_S001163 | NA    | NA     | NA | Sjp_0074580.1 | NA                               | NA       |
| unknown      | NA | NA       | NA       | SJC_S001164 | NA    | NA     | NA | Sjp_0074590.1 | NA                               | NA       |
| unknown      | NA | NA       | NA       | SJC_S001164 | NA    | NA     | NA | Sjp_0074600.1 | NA                               | NA       |
| HSB10kb_1073 | WZ | 39929147 | 39971888 | SJC_S001165 | 1880  | 53343  | -  | Sjp_0074610.1 | enzyme regulator activity        | 0.1755   |
| HSB10kb_1073 | WZ | 39929147 | 39971888 | SJC_S001165 | 1880  | 53343  | -  | Sjp_0074620.1 | enzyme regulator activity        | 0.1755   |
| unknown      | NA | NA       | NA       | SJC_S001165 | NA    | NA     | NA | Sjp_0074630.1 | NA                               | NA       |
| unknown      | NA | NA       | NA       | SJC_S001166 | NA    | NA     | NA | Sjp_0074640.1 | NA                               | NA       |
| unknown      | NA | NA       | NA       | SJC_S001167 | NA    | NA     | NA | Sjp_0074650.1 | NA                               | NA       |
| unknown      | NA | NA       | NA       | SJC_S001168 | NA    | NA     | NA | Sjp_0074660.1 | NA                               | NA       |
| unknown      | NA | NA       | NA       | SJC_S001168 | NA    | NA     | NA | Sjp_0074670.1 | NA                               | NA       |
| unknown      | NA | NA       | NA       | SJC_S001169 | NA    | NA     | NA | Sjp_0074680.1 | NA                               | NA       |
| unknown      | NA | NA       | NA       | SJC_S001169 | NA    | NA     | NA | Sjp_0074690.1 | cellular process                 | 0.63852  |

|              |    |          |          |             |        |        |    |               |                               |          |
|--------------|----|----------|----------|-------------|--------|--------|----|---------------|-------------------------------|----------|
| HSB10kb_1074 | WZ | 44793341 | 44819909 | SJC_S001169 | 110036 | 146654 | +  | Sjp_0074700.1 | catalytic activity            | 0.035844 |
| HSB10kb_1074 | WZ | 44793341 | 44819909 | SJC_S001169 | 110036 | 146654 | +  | Sjp_0074710.1 | molecular transducer activity | 0.50162  |
| unknown      | NA | NA       | NA       | SJC_S001169 | NA     | NA     | NA | Sjp_0074720.1 | NA                            | NA       |
| HSB10kb_1075 | 1  | 51143628 | 51172139 | SJC_S001170 | 2195   | 27813  | -  | Sjp_0074730.1 | cell part                     | 0.009037 |
| unknown      | NA | NA       | NA       | SJC_S001172 | NA     | NA     | NA | Sjp_0074740.1 | NA                            | NA       |
| unknown      | NA | NA       | NA       | SJC_S001172 | NA     | NA     | NA | Sjp_0074750.1 | NA                            | NA       |
| unknown      | NA | NA       | NA       | SJC_S001172 | NA     | NA     | NA | Sjp_0074760.1 | cell part                     | 0.009037 |
| unknown      | NA | NA       | NA       | SJC_S001172 | NA     | NA     | NA | Sjp_0074770.1 | binding                       | 0.052762 |
| unknown      | NA | NA       | NA       | SJC_S001173 | NA     | NA     | NA | Sjp_0074780.1 | NA                            | NA       |
| unknown      | NA | NA       | NA       | SJC_S001173 | NA     | NA     | NA | Sjp_0074790.1 | binding                       | 0.052762 |
| unknown      | NA | NA       | NA       | SJC_S001173 | NA     | NA     | NA | Sjp_0074800.1 | NA                            | NA       |
| unknown      | NA | NA       | NA       | SJC_S001173 | NA     | NA     | NA | Sjp_0074810.1 | NA                            | NA       |
| unknown      | NA | NA       | NA       | SJC_S001173 | NA     | NA     | NA | Sjp_0074820.1 | transporter activity          | 0.782    |
| HSB10kb_1076 | 1  | 42902145 | 42985472 | SJC_S001174 | 15093  | 89924  | +  | Sjp_0074830.1 | NA                            | NA       |
| HSB10kb_1076 | 1  | 42902145 | 42985472 | SJC_S001174 | 15093  | 89924  | +  | Sjp_0074840.1 | NA                            | NA       |
| HSB10kb_1076 | 1  | 42902145 | 42985472 | SJC_S001174 | 15093  | 89924  | +  | Sjp_0074850.1 | NA                            | NA       |
| HSB10kb_1076 | 1  | 42902145 | 42985472 | SJC_S001174 | 15093  | 89924  | +  | Sjp_0074860.1 | NA                            | NA       |
| HSB10kb_1076 | 1  | 42902145 | 42985472 | SJC_S001174 | 15093  | 89924  | +  | Sjp_0074870.1 | transporter activity          | 0.782    |
| HSB10kb_1076 | 1  | 42902145 | 42985472 | SJC_S001174 | 15093  | 89924  | +  | Sjp_0074880.1 | NA                            | NA       |
| HSB10kb_1076 | 1  | 42902145 | 42985472 | SJC_S001174 | 15093  | 89924  | +  | Sjp_0074890.1 | biological regulation         | 0.76396  |
| unknown      | NA | NA       | NA       | SJC_S001175 | NA     | NA     | NA | Sjp_0074900.1 | cell part                     | 0.009037 |
| unknown      | NA | NA       | NA       | SJC_S001176 | NA     | NA     | NA | Sjp_0074910.1 | NA                            | NA       |
| unknown      | NA | NA       | NA       | SJC_S001176 | NA     | NA     | NA | Sjp_0074920.1 | NA                            | NA       |
| unknown      | NA | NA       | NA       | SJC_S001179 | NA     | NA     | NA | Sjp_0074930.1 | NA                            | NA       |
| unknown      | NA | NA       | NA       | SJC_S001180 | NA     | NA     | NA | Sjp_0074940.1 | NA                            | NA       |
| unknown      | NA | NA       | NA       | SJC_S001180 | NA     | NA     | NA | Sjp_0074950.1 | establishment of localization | NA       |
| unknown      | NA | NA       | NA       | SJC_S001180 | NA     | NA     | NA | Sjp_0074960.1 | transcription regulator       | NA       |

|              |    |          |          |             |       |       |    |               |                               |          |
|--------------|----|----------|----------|-------------|-------|-------|----|---------------|-------------------------------|----------|
|              |    |          |          |             |       |       |    |               | activity                      |          |
| unknown      | NA | NA       | NA       | SJC_S001180 | NA    | NA    | NA | Sjp_0074970.1 | catalytic activity            | 0.035844 |
| unknown      | NA | NA       | NA       | SJC_S001181 | NA    | NA    | NA | Sjp_0074990.1 | NA                            | NA       |
| HSB10kb_1077 | 3  | 9542288  | 9572896  | SJC_S001182 | 2154  | 27414 | -  | Sjp_0075000.1 | molecular transducer activity | 0.50162  |
| unknown      | NA | NA       | NA       | SJC_S001183 | NA    | NA    | NA | Sjp_0075020.1 | NA                            | NA       |
| unknown      | NA | NA       | NA       | SJC_S001183 | NA    | NA    | NA | Sjp_0075030.1 | NA                            | NA       |
| HSB10kb_1078 | 2  | 13792061 | 13821843 | SJC_S001184 | 417   | 42922 | +  | Sjp_0075040.1 | NA                            | NA       |
| HSB10kb_1078 | 2  | 13792061 | 13821843 | SJC_S001184 | 417   | 42922 | +  | Sjp_0075050.1 | NA                            | NA       |
| HSB10kb_1078 | 2  | 13792061 | 13821843 | SJC_S001184 | 417   | 42922 | +  | Sjp_0075060.1 | cell part                     | 0.009037 |
| HSB10kb_1078 | 2  | 13792061 | 13821843 | SJC_S001184 | 417   | 42922 | +  | Sjp_0075070.1 | molecular transducer activity | 0.50162  |
| unknown      | NA | NA       | NA       | SJC_S001185 | NA    | NA    | NA | Sjp_0075080.1 | NA                            | NA       |
| unknown      | NA | NA       | NA       | SJC_S001186 | NA    | NA    | NA | Sjp_0075090.1 | NA                            | NA       |
| unknown      | NA | NA       | NA       | SJC_S001187 | NA    | NA    | NA | Sjp_0075100.1 | NA                            | NA       |
| HSB10kb_1079 | WZ | 11893183 | 11949799 | SJC_S001187 | 11169 | 67381 | -  | Sjp_0075110.1 | NA                            | NA       |
| unknown      | NA | NA       | NA       | SJC_S001188 | NA    | NA    | NA | Sjp_0075120.1 | cell part                     | 0.009037 |
| unknown      | NA | NA       | NA       | SJC_S001188 | NA    | NA    | NA | Sjp_0075130.1 | NA                            | NA       |
| unknown      | NA | NA       | NA       | SJC_S001188 | NA    | NA    | NA | Sjp_0075140.1 | NA                            | NA       |
| unknown      | NA | NA       | NA       | SJC_S001189 | NA    | NA    | NA | Sjp_0075150.1 | NA                            | NA       |
| unknown      | NA | NA       | NA       | SJC_S001189 | NA    | NA    | NA | Sjp_0075160.1 | NA                            | NA       |
| unknown      | NA | NA       | NA       | SJC_S001189 | NA    | NA    | NA | Sjp_0075170.1 | NA                            | NA       |
| unknown      | NA | NA       | NA       | SJC_S001189 | NA    | NA    | NA | Sjp_0075180.1 | NA                            | NA       |
| unknown      | NA | NA       | NA       | SJC_S001189 | NA    | NA    | NA | Sjp_0075190.1 | cell part                     | 0.009037 |
| HSB10kb_1080 | 6  | 15155599 | 15263300 | SJC_S001190 | 9316  | 63556 | -  | Sjp_0075200.1 | cell part                     | 0.009037 |
| HSB10kb_1080 | 6  | 15155599 | 15263300 | SJC_S001190 | 9316  | 63556 | -  | Sjp_0075210.1 | cell part                     | 0.009037 |
| HSB10kb_1080 | 6  | 15155599 | 15263300 | SJC_S001190 | 9316  | 63556 | -  | Sjp_0075220.1 | NA                            | NA       |
| HSB10kb_1080 | 6  | 15155599 | 15263300 | SJC_S001190 | 9316  | 63556 | -  | Sjp_0075230.1 | transporter activity          | 0.782    |
| HSB10kb_1081 | WZ | 34516992 | 34562047 | SJC_S001191 | 7464  | 45004 | -  | Sjp_0075240.1 | developmental process         | NA       |
| unknown      | NA | NA       | NA       | SJC_S001192 | NA    | NA    | NA | Sjp_0075250.1 | NA                            | NA       |



|              |    |          |          |             |       |       |    |               |                               |          |
|--------------|----|----------|----------|-------------|-------|-------|----|---------------|-------------------------------|----------|
| unknown      | NA | NA       | NA       | SJC_S001193 | NA    | NA    | NA | Sjp_0075260.1 | NA                            | NA       |
| HSB10kb_1082 | WZ | 42156839 | 42173947 | SJC_S001194 | 7126  | 28515 | -  | Sjp_0075270.1 | NA                            | NA       |
| unknown      | NA | NA       | NA       | SJC_S001194 | NA    | NA    | NA | Sjp_0075280.1 | NA                            | NA       |
| unknown      | NA | NA       | NA       | SJC_S001195 | NA    | NA    | NA | Sjp_0075290.1 | NA                            | NA       |
| unknown      | NA | NA       | NA       | SJC_S001195 | NA    | NA    | NA | Sjp_0075300.1 | NA                            | NA       |
| unknown      | NA | NA       | NA       | SJC_S001195 | NA    | NA    | NA | Sjp_0075310.1 | NA                            | NA       |
| unknown      | NA | NA       | NA       | SJC_S001196 | NA    | NA    | NA | Sjp_0075320.1 | NA                            | NA       |
| unknown      | NA | NA       | NA       | SJC_S001197 | NA    | NA    | NA | Sjp_0075330.1 | NA                            | NA       |
| unknown      | NA | NA       | NA       | SJC_S001199 | NA    | NA    | NA | Sjp_0075340.1 | NA                            | NA       |
| unknown      | NA | NA       | NA       | SJC_S001200 | NA    | NA    | NA | Sjp_0075350.1 | cellular process              | 0.63852  |
| unknown      | NA | NA       | NA       | SJC_S001201 | NA    | NA    | NA | Sjp_0075360.1 | NA                            | NA       |
| unknown      | NA | NA       | NA       | SJC_S001202 | NA    | NA    | NA | Sjp_0075370.1 | catalytic activity            | 0.035844 |
| unknown      | NA | NA       | NA       | SJC_S001203 | NA    | NA    | NA | Sjp_0075380.1 | metabolic process             | 0.41934  |
| unknown      | NA | NA       | NA       | SJC_S001205 | NA    | NA    | NA | Sjp_0075390.1 | NA                            | NA       |
| unknown      | NA | NA       | NA       | SJC_S001205 | NA    | NA    | NA | Sjp_0075400.1 | cell part                     | 0.009037 |
| HSB10kb_1083 | 4  | 29126770 | 29210993 | SJC_S001206 | 2381  | 57478 | +  | Sjp_0075410.1 | molecular transducer activity | 0.50162  |
| HSB10kb_1083 | 4  | 29126770 | 29210993 | SJC_S001206 | 2381  | 57478 | +  | Sjp_0075420.1 | binding                       | 0.052762 |
| unknown      | NA | NA       | NA       | SJC_S001207 | NA    | NA    | NA | Sjp_0075430.1 | biological regulation         | 0.76396  |
| unknown      | NA | NA       | NA       | SJC_S001208 | NA    | NA    | NA | Sjp_0075440.1 | NA                            | NA       |
| HSB10kb_1084 | WZ | 27206658 | 27225164 | SJC_S001210 | 1     | 17195 | +  | Sjp_0075450.1 | catalytic activity            | 0.035844 |
| unknown      | NA | NA       | NA       | SJC_S001210 | NA    | NA    | NA | Sjp_0075460.1 | NA                            | NA       |
| HSB10kb_1085 | 1  | 54316825 | 54343720 | SJC_S001212 | 7636  | 24003 | -  | Sjp_0075470.1 | cell part                     | 0.009037 |
| HSB10kb_1085 | 1  | 54316825 | 54343720 | SJC_S001212 | 7636  | 24003 | -  | Sjp_0075480.1 | NA                            | NA       |
| HSB10kb_1085 | 1  | 54316825 | 54343720 | SJC_S001212 | 7636  | 24003 | -  | Sjp_0075490.1 | NA                            | NA       |
| HSB10kb_1086 | 5  | 4435449  | 4455833  | SJC_S001213 | 6481  | 21072 | -  | Sjp_0075500.1 | locomotion                    | NA       |
| unknown      | NA | NA       | NA       | SJC_S001214 | NA    | NA    | NA | Sjp_0075510.1 | NA                            | NA       |
| unknown      | NA | NA       | NA       | SJC_S001216 | NA    | NA    | NA | Sjp_0075520.1 | NA                            | NA       |
| unknown      | NA | NA       | NA       | SJC_S001216 | NA    | NA    | NA | Sjp_0075530.1 | NA                            | NA       |
| HSB10kb_1087 | 3  | 9375235  | 9393003  | SJC_S001217 | 12295 | 30378 | +  | Sjp_0075540.1 | catalytic activity            | 0.035844 |
| HSB10kb_1088 | WZ | 36714838 | 36742182 | SJC_S001218 | 6578  | 31670 | +  | Sjp_0075550.1 | biological                    | 0.76396  |

|              |        |          |          |             |        |        |    |               |                           |          |
|--------------|--------|----------|----------|-------------|--------|--------|----|---------------|---------------------------|----------|
|              |        |          |          |             |        |        |    |               | regulation                |          |
| HSB10kb_1088 | WZ     | 36714838 | 36742182 | SJC_S001218 | 6578   | 31670  | +  | Sjp_0075560.1 | NA                        | NA       |
| HSB10kb_1088 | WZ     | 36714838 | 36742182 | SJC_S001218 | 6578   | 31670  | +  | Sjp_0075570.1 | catalytic activity        | 0.035844 |
| unknown      | NA     | NA       | NA       | SJC_S001220 | NA     | NA     | NA | Sjp_0075590.1 | extracellular region part | NA       |
| unknown      | NA     | NA       | NA       | SJC_S001222 | NA     | NA     | NA | Sjp_0075600.1 | metabolic process         | 0.41934  |
| unknown      | NA     | NA       | NA       | SJC_S001222 | NA     | NA     | NA | Sjp_0075610.1 | catalytic activity        | 0.035844 |
| HSB10kb_1089 | WZ     | 29595920 | 29615939 | SJC_S001223 | 1464   | 24349  | -  | Sjp_0075620.1 | NA                        | NA       |
| HSB10kb_1090 | 3      | 18885    | 50824    | SJC_S001224 | 11268  | 33039  | +  | Sjp_0075630.1 | transporter activity      | 0.782    |
| HSB10kb_1091 | WZ     | 45477962 | 45511496 | SJC_S001225 | 3186   | 42388  | -  | Sjp_0075640.1 | NA                        | NA       |
| HSB10kb_1091 | WZ     | 45477962 | 45511496 | SJC_S001225 | 3186   | 42388  | -  | Sjp_0075650.1 | NA                        | NA       |
| unknown      | NA     | NA       | NA       | SJC_S001225 | NA     | NA     | NA | Sjp_0075660.1 | biological regulation     | 0.76396  |
| unknown      | NA     | NA       | NA       | SJC_S001226 | NA     | NA     | NA | Sjp_0075670.1 | catalytic activity        | 0.035844 |
| unknown      | NA     | NA       | NA       | SJC_S001227 | NA     | NA     | NA | Sjp_0075680.1 | NA                        | NA       |
| unknown      | NA     | NA       | NA       | SJC_S001228 | NA     | NA     | NA | Sjp_0075690.1 | transporter activity      | 0.782    |
| unknown      | NA     | NA       | NA       | SJC_S001231 | NA     | NA     | NA | Sjp_0075700.1 | binding                   | 0.052762 |
| unknown      | NA     | NA       | NA       | SJC_S001234 | NA     | NA     | NA | Sjp_0075710.1 | catalytic activity        | 0.035844 |
| unknown      | NA     | NA       | NA       | SJC_S001236 | NA     | NA     | NA | Sjp_0075720.1 | NA                        | NA       |
| unknown      | NA     | NA       | NA       | SJC_S001238 | NA     | NA     | NA | Sjp_0075730.1 | catalytic activity        | 0.035844 |
| unknown      | NA     | NA       | NA       | SJC_S001240 | NA     | NA     | NA | Sjp_0075740.1 | NA                        | NA       |
| unknown      | NA     | NA       | NA       | SJC_S001241 | NA     | NA     | NA | Sjp_0075750.1 | NA                        | NA       |
| HSB10kb_1092 | 1      | 32017449 | 32268030 | SJC_S001241 | 31645  | 241006 | +  | Sjp_0075760.1 | NA                        | NA       |
| HSB10kb_1092 | 1      | 32017449 | 32268030 | SJC_S001241 | 31645  | 241006 | +  | Sjp_0075770.1 | binding                   | 0.052762 |
| HSB10kb_1092 | 1      | 32017449 | 32268030 | SJC_S001241 | 31645  | 241006 | +  | Sjp_0075780.1 | binding                   | 0.052762 |
| HSB10kb_1092 | 1      | 32017449 | 32268030 | SJC_S001241 | 31645  | 241006 | +  | Sjp_0075790.1 | binding                   | 0.052762 |
| HSB10kb_1092 | 1      | 32017449 | 32268030 | SJC_S001241 | 31645  | 241006 | +  | Sjp_0075800.1 | NA                        | NA       |
| HSB10kb_1092 | 1      | 32017449 | 32268030 | SJC_S001241 | 31645  | 241006 | +  | Sjp_0075810.1 | NA                        | NA       |
| HSB10kb_1092 | 1      | 32017449 | 32268030 | SJC_S001241 | 31645  | 241006 | +  | Sjp_0075820.1 | catalytic activity        | 0.035844 |
| HSB10kb_1092 | 1      | 32017449 | 32268030 | SJC_S001241 | 31645  | 241006 | +  | Sjp_0075830.1 | NA                        | NA       |
| EBR10kb_466  | "1,WZ" | NA       | NA       | SJC_S001241 | 241007 | 290865 | NA | Sjp_0075830.1 | NA                        | NA       |

|              |        |          |          |             |        |        |    |               |                           |          |
|--------------|--------|----------|----------|-------------|--------|--------|----|---------------|---------------------------|----------|
| EBR10kb_466  | "1,WZ" | NA       | NA       | SJC_S001241 | 241007 | 290865 | NA | Sjp_0075840.1 | catalytic activity        | 0.035844 |
| EBR10kb_466  | "1,WZ" | NA       | NA       | SJC_S001241 | 241007 | 290865 | NA | Sjp_0075850.1 | enzyme regulator activity | 0.1755   |
| HSB10kb_1093 | WZ     | 13444085 | 13459433 | SJC_S001241 | 290866 | 304455 | +  | Sjp_0075850.1 | enzyme regulator activity | 0.1755   |
| HSB10kb_1094 | 1      | 1196248  | 1405759  | SJC_S001242 | 10736  | 237241 | +  | Sjp_0075860.1 | cell part                 | 0.009037 |
| HSB10kb_1094 | 1      | 1196248  | 1405759  | SJC_S001242 | 10736  | 237241 | +  | Sjp_0075870.1 | NA                        | NA       |
| HSB10kb_1094 | 1      | 1196248  | 1405759  | SJC_S001242 | 10736  | 237241 | +  | Sjp_0075880.1 | metabolic process         | 0.41934  |
| HSB10kb_1094 | 1      | 1196248  | 1405759  | SJC_S001242 | 10736  | 237241 | +  | Sjp_0075890.1 | binding                   | 0.052762 |
| HSB10kb_1094 | 1      | 1196248  | 1405759  | SJC_S001242 | 10736  | 237241 | +  | Sjp_0075900.1 | NA                        | NA       |
| HSB10kb_1094 | 1      | 1196248  | 1405759  | SJC_S001242 | 10736  | 237241 | +  | Sjp_0075910.1 | transporter activity      | 0.782    |
| HSB10kb_1094 | 1      | 1196248  | 1405759  | SJC_S001242 | 10736  | 237241 | +  | Sjp_0075920.1 | NA                        | NA       |
| HSB10kb_1094 | 1      | 1196248  | 1405759  | SJC_S001242 | 10736  | 237241 | +  | Sjp_0075930.1 | NA                        | NA       |
| HSB10kb_1094 | 1      | 1196248  | 1405759  | SJC_S001242 | 10736  | 237241 | +  | Sjp_0075940.1 | transporter activity      | 0.782    |
| unknown      | NA     | NA       | NA       | SJC_S001243 | NA     | NA     | NA | Sjp_0075950.1 | binding                   | 0.052762 |
| unknown      | NA     | NA       | NA       | SJC_S001244 | NA     | NA     | NA | Sjp_0075960.1 | NA                        | NA       |
| unknown      | NA     | NA       | NA       | SJC_S001244 | NA     | NA     | NA | Sjp_0075970.1 | cellular process          | 0.63852  |
| unknown      | NA     | NA       | NA       | SJC_S001244 | NA     | NA     | NA | Sjp_0075980.1 | catalytic activity        | 0.035844 |
| unknown      | NA     | NA       | NA       | SJC_S001245 | NA     | NA     | NA | Sjp_0075990.1 | biological regulation     | 0.76396  |
| HSB10kb_1095 | 3      | 3571356  | 3637468  | SJC_S001246 | 908    | 78327  | +  | Sjp_0076000.1 | cell part                 | 0.009037 |
| HSB10kb_1095 | 3      | 3571356  | 3637468  | SJC_S001246 | 908    | 78327  | +  | Sjp_0076010.1 | binding                   | 0.052762 |
| HSB10kb_1095 | 3      | 3571356  | 3637468  | SJC_S001246 | 908    | 78327  | +  | Sjp_0076020.1 | NA                        | NA       |
| HSB10kb_1095 | 3      | 3571356  | 3637468  | SJC_S001246 | 908    | 78327  | +  | Sjp_0076030.1 | NA                        | NA       |
| unknown      | NA     | NA       | NA       | SJC_S001247 | NA     | NA     | NA | Sjp_0076040.1 | NA                        | NA       |
| unknown      | NA     | NA       | NA       | SJC_S001247 | NA     | NA     | NA | Sjp_0076050.1 | NA                        | NA       |
| HSB10kb_1096 | 7      | 754230   | 770048   | SJC_S001248 | 10760  | 34264  | -  | Sjp_0076060.1 | binding                   | 0.052762 |
| HSB10kb_1096 | 7      | 754230   | 770048   | SJC_S001248 | 10760  | 34264  | -  | Sjp_0076070.1 | NA                        | NA       |
| unknown      | NA     | NA       | NA       | SJC_S001248 | NA     | NA     | NA | Sjp_0076080.1 | NA                        | NA       |

|              |    |          |          |             |       |        |    |               |                                                    |         |
|--------------|----|----------|----------|-------------|-------|--------|----|---------------|----------------------------------------------------|---------|
| unknown      | NA | NA       | NA       | SJC_S001249 | NA    | NA     | NA | Sjp_0076090.1 | NA                                                 | NA      |
| unknown      | NA | NA       | NA       | SJC_S001249 | NA    | NA     | NA | Sjp_0076100.1 | nucleic acid binding transcription factor activity | NA      |
| unknown      | NA | NA       | NA       | SJC_S001250 | NA    | NA     | NA | Sjp_0076110.1 | NA                                                 | NA      |
| HSB10kb_1097 | 3  | 12040574 | 12198533 | SJC_S001251 | 3938  | 129285 | +  | Sjp_0076120.1 | establishment of localization                      | NA      |
| HSB10kb_1097 | 3  | 12040574 | 12198533 | SJC_S001251 | 3938  | 129285 | +  | Sjp_0076130.1 | developmental process                              | NA      |
| HSB10kb_1097 | 3  | 12040574 | 12198533 | SJC_S001251 | 3938  | 129285 | +  | Sjp_0076140.1 | NA                                                 | NA      |
| HSB10kb_1097 | 3  | 12040574 | 12198533 | SJC_S001251 | 3938  | 129285 | +  | Sjp_0076150.1 | NA                                                 | NA      |
| HSB10kb_1097 | 3  | 12040574 | 12198533 | SJC_S001251 | 3938  | 129285 | +  | Sjp_0076160.1 | NA                                                 | NA      |
| HSB10kb_1097 | 3  | 12040574 | 12198533 | SJC_S001251 | 3938  | 129285 | +  | Sjp_0076170.1 | NA                                                 | NA      |
| HSB10kb_1098 | WZ | 19686353 | 19827083 | SJC_S001252 | 13357 | 123004 | +  | Sjp_0076180.1 | NA                                                 | NA      |
| HSB10kb_1098 | WZ | 19686353 | 19827083 | SJC_S001252 | 13357 | 123004 | +  | Sjp_0076190.1 | NA                                                 | NA      |
| HSB10kb_1098 | WZ | 19686353 | 19827083 | SJC_S001252 | 13357 | 123004 | +  | Sjp_0076200.1 | NA                                                 | NA      |
| HSB10kb_1099 | 4  | 18318865 | 18383853 | SJC_S001253 | 51181 | 100120 | -  | Sjp_0076210.1 | NA                                                 | NA      |
| HSB10kb_1099 | 4  | 18318865 | 18383853 | SJC_S001253 | 51181 | 100120 | -  | Sjp_0076220.1 | NA                                                 | NA      |
| HSB10kb_1099 | 4  | 18318865 | 18383853 | SJC_S001253 | 51181 | 100120 | -  | Sjp_0076230.1 | locomotion                                         | NA      |
| unknown      | NA | NA       | NA       | SJC_S001254 | NA    | NA     | NA | Sjp_0076240.1 | NA                                                 | NA      |
| HSB10kb_1100 | WZ | 2095708  | 2116909  | SJC_S001254 | 13277 | 50544  | +  | Sjp_0076250.1 | NA                                                 | NA      |
| HSB10kb_1100 | WZ | 2095708  | 2116909  | SJC_S001254 | 13277 | 50544  | +  | Sjp_0076260.1 | NA                                                 | NA      |
| unknown      | NA | NA       | NA       | SJC_S001255 | NA    | NA     | NA | Sjp_0076270.1 | cellular process                                   | 0.63852 |
| unknown      | NA | NA       | NA       | SJC_S001256 | NA    | NA     | NA | Sjp_0076290.1 | NA                                                 | NA      |
| unknown      | NA | NA       | NA       | SJC_S001256 | NA    | NA     | NA | Sjp_0076300.1 | transporter activity                               | 0.782   |
| unknown      | NA | NA       | NA       | SJC_S001256 | NA    | NA     | NA | Sjp_0076310.1 | cellular component organization or biogenesis      | NA      |
| HSB10kb_1101 | 5  | 863011   | 881797   | SJC_S001257 | 42120 | 63977  | +  | Sjp_0076320.1 | establishment of localization                      | NA      |
| unknown      | NA | NA       | NA       | SJC_S001258 | NA    | NA     | NA | Sjp_0076330.1 | transporter activity                               | 0.782   |

|              |    |          |          |             |       |       |    |               |                           |         |
|--------------|----|----------|----------|-------------|-------|-------|----|---------------|---------------------------|---------|
| unknown      | NA | NA       | NA       | SJC_S001258 | NA    | NA    | NA | Sjp_0076340.1 | NA                        | NA      |
| unknown      | NA | NA       | NA       | SJC_S001259 | NA    | NA    | NA | Sjp_0076350.1 | NA                        | NA      |
| unknown      | NA | NA       | NA       | SJC_S001260 | NA    | NA    | NA | Sjp_0076370.1 | NA                        | NA      |
| unknown      | NA | NA       | NA       | SJC_S001261 | NA    | NA    | NA | Sjp_0076380.1 | biological regulation     | 0.76396 |
| unknown      | NA | NA       | NA       | SJC_S001261 | NA    | NA    | NA | Sjp_0076390.1 | NA                        | NA      |
| HSB10kb_1102 | 6  | 5782     | 72119    | SJC_S001262 | 6936  | 79743 | -  | Sjp_0076400.1 | cellular process          | 0.63852 |
| HSB10kb_1102 | 6  | 5782     | 72119    | SJC_S001262 | 6936  | 79743 | -  | Sjp_0076410.1 | NA                        | NA      |
| HSB10kb_1102 | 6  | 5782     | 72119    | SJC_S001262 | 6936  | 79743 | -  | Sjp_0076420.1 | NA                        | NA      |
| unknown      | NA | NA       | NA       | SJC_S001263 | NA    | NA    | NA | Sjp_0076430.1 | cellular process          | 0.63852 |
| HSB10kb_1103 | WZ | 35637394 | 35693642 | SJC_S001264 | 10428 | 28843 | -  | Sjp_0076440.1 | NA                        | NA      |
| HSB10kb_1103 | WZ | 35637394 | 35693642 | SJC_S001264 | 10428 | 28843 | -  | Sjp_0076450.1 | NA                        | NA      |
| unknown      | NA | NA       | NA       | SJC_S001265 | NA    | NA    | NA | Sjp_0076460.1 | NA                        | NA      |
| HSB10kb_1104 | 7  | 3097067  | 3110148  | SJC_S001265 | 42846 | 60839 |    | Sjp_0076470.1 | NA                        | NA      |
| unknown      | NA | NA       | NA       | SJC_S001266 | NA    | NA    | NA | Sjp_0076480.1 | NA                        | NA      |
| unknown      | NA | NA       | NA       | SJC_S001266 | NA    | NA    | NA | Sjp_0076490.1 | NA                        | NA      |
| HSB10kb_1105 | 1  | 27385658 | 27415303 | SJC_S001267 | 937   | 33614 | +  | Sjp_0076500.1 | NA                        | NA      |
| HSB10kb_1105 | 1  | 27385658 | 27415303 | SJC_S001267 | 937   | 33614 | +  | Sjp_0076510.1 | NA                        | NA      |
| unknown      | NA | NA       | NA       | SJC_S001268 | NA    | NA    | NA | Sjp_0076520.1 | NA                        | NA      |
| unknown      | NA | NA       | NA       | SJC_S001269 | NA    | NA    | NA | Sjp_0076530.1 | NA                        | NA      |
| HSB10kb_1106 | 4  | 20517197 | 20563052 | SJC_S001271 | 694   | 28116 |    | Sjp_0076540.1 | NA                        | NA      |
| unknown      | NA | NA       | NA       | SJC_S001272 | NA    | NA    | NA | Sjp_0076550.1 | NA                        | NA      |
| unknown      | NA | NA       | NA       | SJC_S001273 | NA    | NA    | NA | Sjp_0076560.1 | NA                        | NA      |
| unknown      | NA | NA       | NA       | SJC_S001273 | NA    | NA    | NA | Sjp_0076570.1 | NA                        | NA      |
| unknown      | NA | NA       | NA       | SJC_S001274 | NA    | NA    | NA | Sjp_0076580.1 | NA                        | NA      |
| unknown      | NA | NA       | NA       | SJC_S001275 | NA    | NA    | NA | Sjp_0076590.1 | NA                        | NA      |
| unknown      | NA | NA       | NA       | SJC_S001276 | NA    | NA    | NA | Sjp_0076600.1 | enzyme regulator activity | 0.1755  |
| unknown      | NA | NA       | NA       | SJC_S001277 | NA    | NA    | NA | Sjp_0076610.1 | NA                        | NA      |
| unknown      | NA | NA       | NA       | SJC_S001277 | NA    | NA    | NA | Sjp_0076620.1 | NA                        | NA      |
| HSB10kb_1107 | WZ | 17645808 | 17689315 | SJC_S001278 | 16070 | 43429 | -  | Sjp_0076630.1 | NA                        | NA      |
| HSB10kb_1107 | WZ | 17645808 | 17689315 | SJC_S001278 | 16070 | 43429 | -  | Sjp_0076640.1 | NA                        | NA      |
| unknown      | NA | NA       | NA       | SJC_S001279 | NA    | NA    | NA | Sjp_0076650.1 | NA                        | NA      |

|              |    |          |          |             |        |        |    |               |                       |          |
|--------------|----|----------|----------|-------------|--------|--------|----|---------------|-----------------------|----------|
| unknown      | NA | NA       | NA       | SJC_S001281 | NA     | NA     | NA | Sjp_0076670.1 | biological regulation | 0.76396  |
| HSB10kb_1108 | 4  | 17988295 | 18113029 | SJC_S001282 | 11545  | 75917  | -  | Sjp_0076680.1 | NA                    | NA       |
| HSB10kb_1108 | 4  | 17988295 | 18113029 | SJC_S001282 | 11545  | 75917  | -  | Sjp_0076690.1 | NA                    | NA       |
| HSB10kb_1108 | 4  | 17988295 | 18113029 | SJC_S001282 | 11545  | 75917  | -  | Sjp_0076700.1 | NA                    | NA       |
| unknown      | NA | NA       | NA       | SJC_S001284 | NA     | NA     | NA | Sjp_0076710.1 | NA                    | NA       |
| unknown      | NA | NA       | NA       | SJC_S001285 | NA     | NA     | NA | Sjp_0076720.1 | NA                    | NA       |
| unknown      | NA | NA       | NA       | SJC_S001285 | NA     | NA     | NA | Sjp_0076730.1 | NA                    | NA       |
| unknown      | NA | NA       | NA       | SJC_S001286 | NA     | NA     | NA | Sjp_0076740.1 | NA                    | NA       |
| unknown      | NA | NA       | NA       | SJC_S001287 | NA     | NA     | NA | Sjp_0076750.1 | catalytic activity    | 0.035844 |
| unknown      | NA | NA       | NA       | SJC_S001288 | NA     | NA     | NA | Sjp_0076760.1 | NA                    | NA       |
| unknown      | NA | NA       | NA       | SJC_S001288 | NA     | NA     | NA | Sjp_0076770.1 | NA                    | NA       |
| unknown      | NA | NA       | NA       | SJC_S001290 | NA     | NA     | NA | Sjp_0076780.1 | NA                    | NA       |
| unknown      | NA | NA       | NA       | SJC_S001290 | NA     | NA     | NA | Sjp_0076790.1 | NA                    | NA       |
| unknown      | NA | NA       | NA       | SJC_S001292 | NA     | NA     | NA | Sjp_0076800.1 | NA                    | NA       |
| HSB10kb_1109 | 2  | 14085427 | 14285900 | SJC_S001292 | 35519  | 216625 | +  | Sjp_0076810.1 | catalytic activity    | 0.035844 |
| HSB10kb_1109 | 2  | 14085427 | 14285900 | SJC_S001292 | 35519  | 216625 | +  | Sjp_0076820.1 | NA                    | NA       |
| HSB10kb_1109 | 2  | 14085427 | 14285900 | SJC_S001292 | 35519  | 216625 | +  | Sjp_0076830.1 | NA                    | NA       |
| HSB10kb_1109 | 2  | 14085427 | 14285900 | SJC_S001292 | 35519  | 216625 | +  | Sjp_0076840.1 | NA                    | NA       |
| unknown      | NA | NA       | NA       | SJC_S001293 | NA     | NA     | NA | Sjp_0076850.1 | NA                    | NA       |
| unknown      | NA | NA       | NA       | SJC_S001293 | NA     | NA     | NA | Sjp_0076860.1 | cell part             | 0.009037 |
| unknown      | NA | NA       | NA       | SJC_S001293 | NA     | NA     | NA | Sjp_0076870.1 | catalytic activity    | 0.035844 |
| unknown      | NA | NA       | NA       | SJC_S001293 | NA     | NA     | NA | Sjp_0076880.1 | NA                    | NA       |
| unknown      | NA | NA       | NA       | SJC_S001293 | NA     | NA     | NA | Sjp_0076890.1 | NA                    | NA       |
| unknown      | NA | NA       | NA       | SJC_S001293 | NA     | NA     | NA | Sjp_0076900.1 | NA                    | NA       |
| unknown      | NA | NA       | NA       | SJC_S001294 | NA     | NA     | NA | Sjp_0076920.1 | NA                    | NA       |
| unknown      | NA | NA       | NA       | SJC_S001294 | NA     | NA     | NA | Sjp_0076930.1 | NA                    | NA       |
| unknown      | NA | NA       | NA       | SJC_S001294 | NA     | NA     | NA | Sjp_0076940.1 | NA                    | NA       |
| unknown      | NA | NA       | NA       | SJC_S001294 | NA     | NA     | NA | Sjp_0076950.1 | biological regulation | 0.76396  |
| unknown      | NA | NA       | NA       | SJC_S001294 | NA     | NA     | NA | Sjp_0076960.1 | NA                    | NA       |
| unknown      | NA | NA       | NA       | SJC_S001294 | NA     | NA     | NA | Sjp_0076970.1 | cell part             | 0.009037 |
| HSB10kb_1110 | 2  | 29324913 | 29344731 | SJC_S001294 | 170802 | 194635 | -  | Sjp_0076980.1 | NA                    | NA       |
| HSB10kb_1111 | 2  | 4576547  | 4714208  | SJC_S001295 | 39260  | 173269 | +  | Sjp_0076990.1 | NA                    | NA       |

|              |         |          |          |             |        |        |    |               |                       |          |
|--------------|---------|----------|----------|-------------|--------|--------|----|---------------|-----------------------|----------|
| HSB10kb_1111 | 2       | 4576547  | 4714208  | SJC_S001295 | 39260  | 173269 | +  | Sjp_0077000.1 | NA                    | NA       |
| HSB10kb_1111 | 2       | 4576547  | 4714208  | SJC_S001295 | 39260  | 173269 | +  | Sjp_0077010.1 | NA                    | NA       |
| HSB10kb_1111 | 2       | 4576547  | 4714208  | SJC_S001295 | 39260  | 173269 | +  | Sjp_0077020.1 | metabolic process     | 0.41934  |
| HSB10kb_1111 | 2       | 4576547  | 4714208  | SJC_S001295 | 39260  | 173269 | +  | Sjp_0077030.1 | cell part             | 0.009037 |
| HSB10kb_1111 | 2       | 4576547  | 4714208  | SJC_S001295 | 39260  | 173269 | +  | Sjp_0077040.1 | catalytic activity    | 0.035844 |
| EBR10kb_467  | "2,2"   | NA       | NA       | SJC_S001295 | 173270 | 198683 | NA | Sjp_0077050.1 | NA                    | NA       |
| EBR10kb_467  | "2,2"   | NA       | NA       | SJC_S001295 | 173270 | 198683 | NA | Sjp_0077060.1 | cellular process      | 0.63852  |
| HSB10kb_1112 | 2       | 4746052  | 4788223  | SJC_S001295 | 198684 | 223817 | -  | Sjp_0077060.1 | cellular process      | 0.63852  |
| HSB10kb_1112 | 2       | 4746052  | 4788223  | SJC_S001295 | 198684 | 223817 | -  | Sjp_0077070.1 | NA                    | NA       |
| unknown      | NA      | NA       | NA       | SJC_S001296 | NA     | NA     | NA | Sjp_0077080.1 | NA                    | NA       |
| HSB10kb_1113 | 2       | 31907458 | 31920829 | SJC_S001296 | 153281 | 165416 | -  | Sjp_0077090.1 | metabolic process     | 0.41934  |
| unknown      | NA      | NA       | NA       | SJC_S001297 | NA     | NA     | NA | Sjp_0077100.1 | catalytic activity    | 0.035844 |
| unknown      | NA      | NA       | NA       | SJC_S001298 | NA     | NA     | NA | Sjp_0077110.1 | NA                    | NA       |
| unknown      | NA      | NA       | NA       | SJC_S001298 | NA     | NA     | NA | Sjp_0077120.1 | NA                    | NA       |
| unknown      | NA      | NA       | NA       | SJC_S001298 | NA     | NA     | NA | Sjp_0077130.1 | cellular process      | 0.63852  |
| unknown      | NA      | NA       | NA       | SJC_S001298 | NA     | NA     | NA | Sjp_0077140.1 | NA                    | NA       |
| unknown      | NA      | NA       | NA       | SJC_S001299 | NA     | NA     | NA | Sjp_0077150.1 | biological regulation | 0.76396  |
| unknown      | NA      | NA       | NA       | SJC_S001299 | NA     | NA     | NA | Sjp_0077160.1 | NA                    | NA       |
| HSB10kb_1114 | WZ      | 43574649 | 43626496 | SJC_S001299 | 29324  | 69097  | +  | Sjp_0077170.1 | catalytic activity    | 0.035844 |
| HSB10kb_1114 | WZ      | 43574649 | 43626496 | SJC_S001299 | 29324  | 69097  | +  | Sjp_0077180.1 | NA                    | NA       |
| EBR10kb_468  | "WZ,WZ" | NA       | NA       | SJC_S001299 | 69098  | 97222  | NA | Sjp_0077180.1 | NA                    | NA       |
| HSB10kb_1115 | WZ      | 43177617 | 43195519 | SJC_S001299 | 97223  | 112898 | -  | Sjp_0077190.1 | NA                    | NA       |
| EBR10kb_469  | "WZ,WZ" | NA       | NA       | SJC_S001299 | 112899 | 129320 | NA | NA            | NA                    | NA       |
| HSB10kb_1116 | WZ      | 43204609 | 43225304 | SJC_S001299 | 129321 | 141437 | +  | NA            | NA                    | NA       |
| unknown      | NA      | NA       | NA       | SJC_S001300 | NA     | NA     | NA | Sjp_0077210.1 | binding               | 0.052762 |
| unknown      | NA      | NA       | NA       | SJC_S001300 | NA     | NA     | NA | Sjp_0077220.1 | NA                    | NA       |
| unknown      | NA      | NA       | NA       | SJC_S001300 | NA     | NA     | NA | Sjp_0077240.1 | cell part             | 0.009037 |
| unknown      | NA      | NA       | NA       | SJC_S001300 | NA     | NA     | NA | Sjp_0077250.1 | catalytic activity    | 0.035844 |
| HSB10kb_1117 | WZ      | 35967324 | 36093952 | SJC_S001301 | 17159  | 87588  | +  | Sjp_0077260.1 | NA                    | NA       |
| HSB10kb_1117 | WZ      | 35967324 | 36093952 | SJC_S001301 | 17159  | 87588  | +  | Sjp_0077270.1 | NA                    | NA       |
| HSB10kb_1117 | WZ      | 35967324 | 36093952 | SJC_S001301 | 17159  | 87588  | +  | Sjp_0077280.1 | NA                    | NA       |

|              |    |          |          |             |        |        |    |               |                               |          |
|--------------|----|----------|----------|-------------|--------|--------|----|---------------|-------------------------------|----------|
| HSB10kb_1117 | WZ | 35967324 | 36093952 | SJC_S001301 | 17159  | 87588  | +  | Sjp_0077290.1 | NA                            | NA       |
| HSB10kb_1117 | WZ | 35967324 | 36093952 | SJC_S001301 | 17159  | 87588  | +  | Sjp_0077300.1 | binding                       | 0.052762 |
| unknown      | NA | NA       | NA       | SJC_S001302 | NA     | NA     | NA | Sjp_0077310.1 | catalytic activity            | 0.035844 |
| unknown      | NA | NA       | NA       | SJC_S001302 | NA     | NA     | NA | Sjp_0077320.1 | NA                            | NA       |
| HSB10kb_1118 | WZ | 22605472 | 22639800 | SJC_S001302 | 109534 | 142413 | +  | Sjp_0077330.1 | cell part                     | 0.009037 |
| HSB10kb_1118 | WZ | 22605472 | 22639800 | SJC_S001302 | 109534 | 142413 | +  | Sjp_0077340.1 | catalytic activity            | 0.035844 |
| HSB10kb_1118 | WZ | 22605472 | 22639800 | SJC_S001302 | 109534 | 142413 | +  | Sjp_0077350.1 | NA                            | NA       |
| HSB10kb_1118 | WZ | 22605472 | 22639800 | SJC_S001302 | 109534 | 142413 | +  | Sjp_0077360.1 | catalytic activity            | 0.035844 |
| unknown      | NA | NA       | NA       | SJC_S001303 | NA     | NA     | NA | Sjp_0077370.1 | NA                            | NA       |
| unknown      | NA | NA       | NA       | SJC_S001304 | NA     | NA     | NA | Sjp_0077380.1 | establishment of localization | NA       |
| unknown      | NA | NA       | NA       | SJC_S001304 | NA     | NA     | NA | Sjp_0077390.1 | NA                            | NA       |
| unknown      | NA | NA       | NA       | SJC_S001304 | NA     | NA     | NA | Sjp_0077400.1 | NA                            | NA       |
| unknown      | NA | NA       | NA       | SJC_S001305 | NA     | NA     | NA | Sjp_0077410.1 | NA                            | NA       |
| unknown      | NA | NA       | NA       | SJC_S001305 | NA     | NA     | NA | Sjp_0077420.1 | NA                            | NA       |
| unknown      | NA | NA       | NA       | SJC_S001307 | NA     | NA     | NA | Sjp_0077430.1 | NA                            | NA       |
| unknown      | NA | NA       | NA       | SJC_S001307 | NA     | NA     | NA | Sjp_0077440.1 | NA                            | NA       |
| unknown      | NA | NA       | NA       | SJC_S001307 | NA     | NA     | NA | Sjp_0077450.1 | NA                            | NA       |
| unknown      | NA | NA       | NA       | SJC_S001308 | NA     | NA     | NA | Sjp_0077460.1 | NA                            | NA       |
| unknown      | NA | NA       | NA       | SJC_S001308 | NA     | NA     | NA | Sjp_0077470.1 | NA                            | NA       |
| unknown      | NA | NA       | NA       | SJC_S001308 | NA     | NA     | NA | Sjp_0077480.1 | binding                       | 0.052762 |
| HSB10kb_1119 | WZ | 45538998 | 45565304 | SJC_S001308 | 57627  | 78070  | -  | Sjp_0077490.1 | NA                            | NA       |
| HSB10kb_1120 | 3  | 23428936 | 23449161 | SJC_S001309 | 4403   | 27131  | +  | Sjp_0077500.1 | transporter activity          | 0.782    |
| unknown      | NA | NA       | NA       | SJC_S001310 | NA     | NA     | NA | Sjp_0077510.1 | biological regulation         | 0.76396  |
| HSB10kb_1121 | 1  | 25313317 | 25500399 | SJC_S001311 | 10969  | 157235 | -  | Sjp_0077520.1 | NA                            | NA       |
| HSB10kb_1121 | 1  | 25313317 | 25500399 | SJC_S001311 | 10969  | 157235 | -  | Sjp_0077530.1 | NA                            | NA       |
| HSB10kb_1121 | 1  | 25313317 | 25500399 | SJC_S001311 | 10969  | 157235 | -  | Sjp_0077540.1 | reproductive process          | NA       |
| HSB10kb_1121 | 1  | 25313317 | 25500399 | SJC_S001311 | 10969  | 157235 | -  | Sjp_0077550.1 | cellular process              | 0.63852  |
| HSB10kb_1121 | 1  | 25313317 | 25500399 | SJC_S001311 | 10969  | 157235 | -  | Sjp_0077560.1 | cellular process              | 0.63852  |
| unknown      | NA | NA       | NA       | SJC_S001311 | NA     | NA     | NA | Sjp_0077570.1 | NA                            | NA       |
| unknown      | NA | NA       | NA       | SJC_S001311 | NA     | NA     | NA | Sjp_0077580.1 | NA                            | NA       |



|              |    |          |          |             |        |        |    |               |                               |          |
|--------------|----|----------|----------|-------------|--------|--------|----|---------------|-------------------------------|----------|
| unknown      | NA | NA       | NA       | SJC_S001312 | NA     | NA     | NA | Sjp_0077590.1 | NA                            | NA       |
| unknown      | NA | NA       | NA       | SJC_S001312 | NA     | NA     | NA | Sjp_0077600.1 | NA                            | NA       |
| unknown      | NA | NA       | NA       | SJC_S001312 | NA     | NA     | NA | Sjp_0077610.1 | molecular transducer activity | 0.50162  |
| HSB10kb_1122 | 1  | 29072383 | 29224960 | SJC_S001312 | 140753 | 262953 | +  | Sjp_0077620.1 | immune system process         | NA       |
| HSB10kb_1122 | 1  | 29072383 | 29224960 | SJC_S001312 | 140753 | 262953 | +  | Sjp_0077630.1 | NA                            | NA       |
| HSB10kb_1122 | 1  | 29072383 | 29224960 | SJC_S001312 | 140753 | 262953 | +  | Sjp_0077640.1 | biological regulation         | 0.76396  |
| HSB10kb_1122 | 1  | 29072383 | 29224960 | SJC_S001312 | 140753 | 262953 | +  | Sjp_0077650.1 | NA                            | NA       |
| HSB10kb_1122 | 1  | 29072383 | 29224960 | SJC_S001312 | 140753 | 262953 | +  | Sjp_0077660.1 | NA                            | NA       |
| HSB10kb_1122 | 1  | 29072383 | 29224960 | SJC_S001312 | 140753 | 262953 | +  | Sjp_0077670.1 | NA                            | NA       |
| HSB10kb_1122 | 1  | 29072383 | 29224960 | SJC_S001312 | 140753 | 262953 | +  | Sjp_0077680.1 | biological regulation         | 0.76396  |
| HSB10kb_1122 | 1  | 29072383 | 29224960 | SJC_S001312 | 140753 | 262953 | +  | Sjp_0077690.1 | NA                            | NA       |
| HSB10kb_1122 | 1  | 29072383 | 29224960 | SJC_S001312 | 140753 | 262953 | +  | Sjp_0077700.1 | cell part                     | 0.009037 |
| unknown      | NA | NA       | NA       | SJC_S001313 | NA     | NA     | NA | Sjp_0077710.1 | NA                            | NA       |
| unknown      | NA | NA       | NA       | SJC_S001314 | NA     | NA     | NA | Sjp_0077720.1 | NA                            | NA       |
| unknown      | NA | NA       | NA       | SJC_S001314 | NA     | NA     | NA | Sjp_0077730.1 | catalytic activity            | 0.035844 |
| unknown      | NA | NA       | NA       | SJC_S001314 | NA     | NA     | NA | Sjp_0077740.1 | NA                            | NA       |
| unknown      | NA | NA       | NA       | SJC_S001315 | NA     | NA     | NA | Sjp_0077750.1 | NA                            | NA       |
| unknown      | NA | NA       | NA       | SJC_S001315 | NA     | NA     | NA | Sjp_0077760.1 | NA                            | NA       |
| unknown      | NA | NA       | NA       | SJC_S001315 | NA     | NA     | NA | Sjp_0077770.1 | NA                            | NA       |
| unknown      | NA | NA       | NA       | SJC_S001316 | NA     | NA     | NA | Sjp_0077780.1 | NA                            | NA       |
| unknown      | NA | NA       | NA       | SJC_S001317 | NA     | NA     | NA | Sjp_0077790.1 | NA                            | NA       |
| unknown      | NA | NA       | NA       | SJC_S001317 | NA     | NA     | NA | Sjp_0077800.1 | cell part                     | 0.009037 |
| unknown      | NA | NA       | NA       | SJC_S001317 | NA     | NA     | NA | Sjp_0077810.1 | NA                            | NA       |
| unknown      | NA | NA       | NA       | SJC_S001317 | NA     | NA     | NA | Sjp_0077820.1 | NA                            | NA       |
| unknown      | NA | NA       | NA       | SJC_S001318 | NA     | NA     | NA | Sjp_0077830.1 | NA                            | NA       |
| unknown      | NA | NA       | NA       | SJC_S001318 | NA     | NA     | NA | Sjp_0077840.1 | NA                            | NA       |
| unknown      | NA | NA       | NA       | SJC_S001318 | NA     | NA     | NA | Sjp_0077850.1 | NA                            | NA       |
| unknown      | NA | NA       | NA       | SJC_S001318 | NA     | NA     | NA | Sjp_0077860.1 | NA                            | NA       |
| unknown      | NA | NA       | NA       | SJC_S001318 | NA     | NA     | NA | Sjp_0077870.1 | NA                            | NA       |

|              |    |          |          |             |      |        |    |               |                                               |          |
|--------------|----|----------|----------|-------------|------|--------|----|---------------|-----------------------------------------------|----------|
| unknown      | NA | NA       | NA       | SJC_S001319 | NA   | NA     | NA | Sjp_0077890.1 | NA                                            | NA       |
| unknown      | NA | NA       | NA       | SJC_S001319 | NA   | NA     | NA | Sjp_0077900.1 | cellular component organization or biogenesis | NA       |
| unknown      | NA | NA       | NA       | SJC_S001319 | NA   | NA     | NA | Sjp_0077910.1 | NA                                            | NA       |
| unknown      | NA | NA       | NA       | SJC_S001319 | NA   | NA     | NA | Sjp_0077920.1 | NA                                            | NA       |
| unknown      | NA | NA       | NA       | SJC_S001319 | NA   | NA     | NA | Sjp_0077930.1 | NA                                            | NA       |
| unknown      | NA | NA       | NA       | SJC_S001320 | NA   | NA     | NA | Sjp_0077940.1 | NA                                            | NA       |
| unknown      | NA | NA       | NA       | SJC_S001321 | NA   | NA     | NA | Sjp_0077950.1 | binding                                       | 0.052762 |
| unknown      | NA | NA       | NA       | SJC_S001321 | NA   | NA     | NA | Sjp_0077960.1 | NA                                            | NA       |
| unknown      | NA | NA       | NA       | SJC_S001321 | NA   | NA     | NA | Sjp_0077970.1 | NA                                            | NA       |
| unknown      | NA | NA       | NA       | SJC_S001322 | NA   | NA     | NA | Sjp_0077980.1 | NA                                            | NA       |
| unknown      | NA | NA       | NA       | SJC_S001323 | NA   | NA     | NA | Sjp_0077990.1 | NA                                            | NA       |
| unknown      | NA | NA       | NA       | SJC_S001323 | NA   | NA     | NA | Sjp_0078000.1 | NA                                            | NA       |
| unknown      | NA | NA       | NA       | SJC_S001323 | NA   | NA     | NA | Sjp_0078010.1 | catalytic activity                            | 0.035844 |
| unknown      | NA | NA       | NA       | SJC_S001323 | NA   | NA     | NA | Sjp_0078020.1 | biological regulation                         | 0.76396  |
| unknown      | NA | NA       | NA       | SJC_S001323 | NA   | NA     | NA | Sjp_0078030.1 | NA                                            | NA       |
| unknown      | NA | NA       | NA       | SJC_S001324 | NA   | NA     | NA | Sjp_0078040.1 | NA                                            | NA       |
| unknown      | NA | NA       | NA       | SJC_S001324 | NA   | NA     | NA | Sjp_0078050.1 | binding                                       | 0.052762 |
| unknown      | NA | NA       | NA       | SJC_S001325 | NA   | NA     | NA | Sjp_0078060.1 | NA                                            | NA       |
| unknown      | NA | NA       | NA       | SJC_S001325 | NA   | NA     | NA | Sjp_0078070.1 | NA                                            | NA       |
| unknown      | NA | NA       | NA       | SJC_S001326 | NA   | NA     | NA | Sjp_0078080.1 | NA                                            | NA       |
| unknown      | NA | NA       | NA       | SJC_S001326 | NA   | NA     | NA | Sjp_0078090.1 | NA                                            | NA       |
| unknown      | NA | NA       | NA       | SJC_S001327 | NA   | NA     | NA | Sjp_0078100.1 | NA                                            | NA       |
| unknown      | NA | NA       | NA       | SJC_S001327 | NA   | NA     | NA | Sjp_0078110.1 | catalytic activity                            | 0.035844 |
| unknown      | NA | NA       | NA       | SJC_S001327 | NA   | NA     | NA | Sjp_0078120.1 | NA                                            | NA       |
| unknown      | NA | NA       | NA       | SJC_S001327 | NA   | NA     | NA | Sjp_0078130.1 | NA                                            | NA       |
| HSB10kb_1123 | WZ | 1274478  | 1404409  | SJC_S001328 | 4642 | 132039 | +  | Sjp_0078140.1 | protein binding transcription factor activity | NA       |
| HSB10kb_1124 | 1  | 43741398 | 43765760 | SJC_S001329 | 5829 | 29991  | +  | Sjp_0078160.1 | catalytic activity                            | 0.035844 |
| HSB10kb_1124 | 1  | 43741398 | 43765760 | SJC_S001329 | 5829 | 29991  | +  | Sjp_0078170.1 | NA                                            | NA       |

|              |    |          |          |             |       |       |    |               |                       |          |
|--------------|----|----------|----------|-------------|-------|-------|----|---------------|-----------------------|----------|
| unknown      | NA | NA       | NA       | SJC_S001329 | NA    | NA    | NA | Sjp_0078180.1 | cell part             | 0.009037 |
| HSB10kb_1125 | 1  | 26685588 | 26738030 | SJC_S001330 | 10195 | 64028 | +  | Sjp_0078190.1 | binding               | 0.052762 |
| HSB10kb_1125 | 1  | 26685588 | 26738030 | SJC_S001330 | 10195 | 64028 | +  | Sjp_0078200.1 | catalytic activity    | 0.035844 |
| unknown      | NA | NA       | NA       | SJC_S001330 | NA    | NA    | NA | Sjp_0078210.1 | NA                    | NA       |
| unknown      | NA | NA       | NA       | SJC_S001332 | NA    | NA    | NA | Sjp_0078220.1 | NA                    | NA       |
| HSB10kb_1126 | 6  | 7745537  | 7815279  | SJC_S001332 | 56450 | 72469 |    | NA            | NA                    | NA       |
| unknown      | NA | NA       | NA       | SJC_S001333 | NA    | NA    | NA | Sjp_0078230.1 | NA                    | NA       |
| unknown      | NA | NA       | NA       | SJC_S001333 | NA    | NA    | NA | Sjp_0078240.1 | NA                    | NA       |
| unknown      | NA | NA       | NA       | SJC_S001333 | NA    | NA    | NA | Sjp_0078250.1 | catalytic activity    | 0.035844 |
| unknown      | NA | NA       | NA       | SJC_S001333 | NA    | NA    | NA | Sjp_0078270.1 | NA                    | NA       |
| HSB10kb_1127 | 6  | 8203238  | 8239324  | SJC_S001334 | 10465 | 30480 | -  | Sjp_0078280.1 | binding               | 0.052762 |
| HSB10kb_1128 | 1  | 59103595 | 59209183 | SJC_S001335 | 527   | 89051 | +  | Sjp_0078290.1 | NA                    | NA       |
| HSB10kb_1128 | 1  | 59103595 | 59209183 | SJC_S001335 | 527   | 89051 | +  | Sjp_0078300.1 | NA                    | NA       |
| HSB10kb_1128 | 1  | 59103595 | 59209183 | SJC_S001335 | 527   | 89051 | +  | Sjp_0078310.1 | NA                    | NA       |
| unknown      | NA | NA       | NA       | SJC_S001335 | NA    | NA    | NA | Sjp_0078320.1 | NA                    | NA       |
| unknown      | NA | NA       | NA       | SJC_S001335 | NA    | NA    | NA | Sjp_0078330.1 | NA                    | NA       |
| unknown      | NA | NA       | NA       | SJC_S001336 | NA    | NA    | NA | Sjp_0078340.1 | NA                    | NA       |
| unknown      | NA | NA       | NA       | SJC_S001336 | NA    | NA    | NA | Sjp_0078350.1 | catalytic activity    | 0.035844 |
| HSB10kb_1129 | 4  | 10873153 | 10931197 | SJC_S001337 | 9354  | 90313 | -  | Sjp_0078360.1 | cell part             | 0.009037 |
| HSB10kb_1130 | 6  | 13411668 | 13427929 | SJC_S001338 | 10006 | 20946 | +  | Sjp_0078370.1 | NA                    | NA       |
| HSB10kb_1130 | 6  | 13411668 | 13427929 | SJC_S001338 | 10006 | 20946 | +  | Sjp_0078380.1 | NA                    | NA       |
| unknown      | NA | NA       | NA       | SJC_S001339 | NA    | NA    | NA | Sjp_0078390.1 | cell part             | 0.009037 |
| unknown      | NA | NA       | NA       | SJC_S001340 | NA    | NA    | NA | Sjp_0078400.1 | NA                    | NA       |
| unknown      | NA | NA       | NA       | SJC_S001340 | NA    | NA    | NA | Sjp_0078410.1 | NA                    | NA       |
| HSB10kb_1131 | WZ | 53487134 | 53535632 | SJC_S001341 | 20599 | 61439 | -  | Sjp_0078420.1 | transporter activity  | 0.782    |
| unknown      | NA | NA       | NA       | SJC_S001341 | NA    | NA    | NA | Sjp_0078430.1 | biological regulation | 0.76396  |
| unknown      | NA | NA       | NA       | SJC_S001342 | NA    | NA    | NA | Sjp_0078440.1 | NA                    | NA       |
| unknown      | NA | NA       | NA       | SJC_S001342 | NA    | NA    | NA | Sjp_0078450.1 | NA                    | NA       |
| HSB10kb_1132 | 3  | 19232983 | 19257569 | SJC_S001343 | 9985  | 29921 | +  | Sjp_0078460.1 | NA                    | NA       |
| unknown      | NA | NA       | NA       | SJC_S001344 | NA    | NA    | NA | Sjp_0078490.1 | NA                    | NA       |
| unknown      | NA | NA       | NA       | SJC_S001344 | NA    | NA    | NA | Sjp_0078500.1 | cellular component    | NA       |

|              |    |          |          |             |       |       |    |               |                                               |          |
|--------------|----|----------|----------|-------------|-------|-------|----|---------------|-----------------------------------------------|----------|
|              |    |          |          |             |       |       |    |               | organization or biogenesis                    |          |
| unknown      | NA | NA       | NA       | SJC_S001345 | NA    | NA    | NA | Sjp_0078510.1 | NA                                            | NA       |
| unknown      | NA | NA       | NA       | SJC_S001345 | NA    | NA    | NA | Sjp_0078520.1 | NA                                            | NA       |
| unknown      | NA | NA       | NA       | SJC_S001346 | NA    | NA    | NA | Sjp_0078530.1 | catalytic activity                            | 0.035844 |
| unknown      | NA | NA       | NA       | SJC_S001346 | NA    | NA    | NA | Sjp_0078540.1 | NA                                            | NA       |
| unknown      | NA | NA       | NA       | SJC_S001346 | NA    | NA    | NA | Sjp_0078550.1 | catalytic activity                            | 0.035844 |
| unknown      | NA | NA       | NA       | SJC_S001346 | NA    | NA    | NA | Sjp_0078560.1 | NA                                            | NA       |
| unknown      | NA | NA       | NA       | SJC_S001347 | NA    | NA    | NA | Sjp_0078570.1 | NA                                            | NA       |
| HSB10kb_1133 | 3  | 7488393  | 7502972  | SJC_S001347 | 62146 | 94360 | -  | Sjp_0078580.1 | NA                                            | NA       |
| unknown      | NA | NA       | NA       | SJC_S001349 | NA    | NA    | NA | Sjp_0078590.1 | NA                                            | NA       |
| unknown      | NA | NA       | NA       | SJC_S001350 | NA    | NA    | NA | Sjp_0078600.1 | biological regulation                         | 0.76396  |
| unknown      | NA | NA       | NA       | SJC_S001352 | NA    | NA    | NA | Sjp_0078610.1 | metabolic process                             | 0.41934  |
| unknown      | NA | NA       | NA       | SJC_S001352 | NA    | NA    | NA | Sjp_0078620.1 | NA                                            | NA       |
| unknown      | NA | NA       | NA       | SJC_S001353 | NA    | NA    | NA | Sjp_0078630.1 | NA                                            | NA       |
| unknown      | NA | NA       | NA       | SJC_S001354 | NA    | NA    | NA | Sjp_0078650.1 | NA                                            | NA       |
| unknown      | NA | NA       | NA       | SJC_S001354 | NA    | NA    | NA | Sjp_0078660.1 | NA                                            | NA       |
| unknown      | NA | NA       | NA       | SJC_S001354 | NA    | NA    | NA | Sjp_0078670.1 | NA                                            | NA       |
| HSB10kb_1134 | 1  | 58447902 | 58459273 | SJC_S001355 | 1649  | 14172 | +  | Sjp_0078680.1 | binding                                       | 0.052762 |
| unknown      | NA | NA       | NA       | SJC_S001355 | NA    | NA    | NA | Sjp_0078690.1 | binding                                       | 0.052762 |
| HSB10kb_1135 | 2  | 13606327 | 13630875 | SJC_S001356 | 7892  | 30466 | +  | Sjp_0078700.1 | biological regulation                         | 0.76396  |
| HSB10kb_1135 | 2  | 13606327 | 13630875 | SJC_S001356 | 7892  | 30466 | +  | Sjp_0078710.1 | developmental process                         | NA       |
| HSB10kb_1135 | 2  | 13606327 | 13630875 | SJC_S001356 | 7892  | 30466 | +  | Sjp_0078720.1 | NA                                            | NA       |
| unknown      | NA | NA       | NA       | SJC_S001356 | NA    | NA    | NA | Sjp_0078730.1 | NA                                            | NA       |
| HSB10kb_1136 | WZ | 58989439 | 59011719 | SJC_S001357 | 8032  | 46310 | -  | Sjp_0078740.1 | NA                                            | NA       |
| HSB10kb_1136 | WZ | 58989439 | 59011719 | SJC_S001357 | 8032  | 46310 | -  | Sjp_0078750.1 | cellular component organization or biogenesis | NA       |
| unknown      | NA | NA       | NA       | SJC_S001358 | NA    | NA    | NA | Sjp_0078760.1 | NA                                            | NA       |

|              |    |          |          |             |       |       |    |               |                       |          |
|--------------|----|----------|----------|-------------|-------|-------|----|---------------|-----------------------|----------|
| unknown      | NA | NA       | NA       | SJC_S001358 | NA    | NA    | NA | Sjp_0078770.1 | cell part             | 0.009037 |
| unknown      | NA | NA       | NA       | SJC_S001358 | NA    | NA    | NA | Sjp_0078780.1 | biological regulation | 0.76396  |
| unknown      | NA | NA       | NA       | SJC_S001359 | NA    | NA    | NA | Sjp_0078790.1 | cell part             | 0.009037 |
| unknown      | NA | NA       | NA       | SJC_S001360 | NA    | NA    | NA | Sjp_0078800.1 | NA                    | NA       |
| unknown      | NA | NA       | NA       | SJC_S001361 | NA    | NA    | NA | Sjp_0078810.1 | NA                    | NA       |
| unknown      | NA | NA       | NA       | SJC_S001362 | NA    | NA    | NA | Sjp_0078820.1 | NA                    | NA       |
| unknown      | NA | NA       | NA       | SJC_S001362 | NA    | NA    | NA | Sjp_0078830.1 | NA                    | NA       |
| HSB10kb_1137 | WZ | 26672315 | 26735492 | SJC_S001363 | 2977  | 98331 | -  | Sjp_0078840.1 | biological regulation | 0.76396  |
| HSB10kb_1137 | WZ | 26672315 | 26735492 | SJC_S001363 | 2977  | 98331 | -  | Sjp_0078850.1 | biological regulation | 0.76396  |
| HSB10kb_1137 | WZ | 26672315 | 26735492 | SJC_S001363 | 2977  | 98331 | -  | Sjp_0078860.1 | metabolic process     | 0.41934  |
| unknown      | NA | NA       | NA       | SJC_S001365 | NA    | NA    | NA | Sjp_0078870.1 | NA                    | NA       |
| HSB10kb_1138 | 1  | 30327360 | 30391586 | SJC_S001366 | 1597  | 61754 | +  | Sjp_0078880.1 | NA                    | NA       |
| HSB10kb_1138 | 1  | 30327360 | 30391586 | SJC_S001366 | 1597  | 61754 | +  | Sjp_0078890.1 | NA                    | NA       |
| unknown      | NA | NA       | NA       | SJC_S001369 | NA    | NA    | NA | Sjp_0078900.1 | NA                    | NA       |
| unknown      | NA | NA       | NA       | SJC_S001370 | NA    | NA    | NA | Sjp_0078910.1 | catalytic activity    | 0.035844 |
| unknown      | NA | NA       | NA       | SJC_S001370 | NA    | NA    | NA | Sjp_0078920.1 | NA                    | NA       |
| unknown      | NA | NA       | NA       | SJC_S001372 | NA    | NA    | NA | Sjp_0078930.1 | biological regulation | 0.76396  |
| unknown      | NA | NA       | NA       | SJC_S001375 | NA    | NA    | NA | Sjp_0078950.1 | reproductive process  | NA       |
| unknown      | NA | NA       | NA       | SJC_S001375 | NA    | NA    | NA | Sjp_0078960.1 | binding               | 0.052762 |
| unknown      | NA | NA       | NA       | SJC_S001376 | NA    | NA    | NA | Sjp_0078970.1 | NA                    | NA       |
| unknown      | NA | NA       | NA       | SJC_S001377 | NA    | NA    | NA | Sjp_0078980.1 | catalytic activity    | 0.035844 |
| unknown      | NA | NA       | NA       | SJC_S001377 | NA    | NA    | NA | Sjp_0078990.1 | transporter activity  | 0.782    |
| unknown      | NA | NA       | NA       | SJC_S001378 | NA    | NA    | NA | Sjp_0079000.1 | cell part             | 0.009037 |
| HSB10kb_1139 | WZ | 5120426  | 5152768  | SJC_S001379 | 3401  | 30523 | +  | Sjp_0079010.1 | NA                    | NA       |
| unknown      | NA | NA       | NA       | SJC_S001380 | NA    | NA    | NA | Sjp_0079020.1 | biological regulation | 0.76396  |
| HSB10kb_1140 | WZ | 45034599 | 45061812 | SJC_S001381 | 14893 | 38569 | +  | Sjp_0079030.1 | NA                    | NA       |

|              |    |          |          |             |     |       |    |               |                                  |          |
|--------------|----|----------|----------|-------------|-----|-------|----|---------------|----------------------------------|----------|
| unknown      | NA | NA       | NA       | SJC_S001381 | NA  | NA    | NA | Sjp_0079040.1 | NA                               | NA       |
| unknown      | NA | NA       | NA       | SJC_S001382 | NA  | NA    | NA | Sjp_0079050.1 | NA                               | NA       |
| unknown      | NA | NA       | NA       | SJC_S001382 | NA  | NA    | NA | Sjp_0079060.1 | biological regulation            | 0.76396  |
| unknown      | NA | NA       | NA       | SJC_S001384 | NA  | NA    | NA | Sjp_0079070.1 | biological regulation            | 0.76396  |
| unknown      | NA | NA       | NA       | SJC_S001385 | NA  | NA    | NA | Sjp_0079080.1 | NA                               | NA       |
| unknown      | NA | NA       | NA       | SJC_S001386 | NA  | NA    | NA | Sjp_0079090.1 | NA                               | NA       |
| unknown      | NA | NA       | NA       | SJC_S001386 | NA  | NA    | NA | Sjp_0079100.1 | NA                               | NA       |
| unknown      | NA | NA       | NA       | SJC_S001386 | NA  | NA    | NA | Sjp_0079110.1 | NA                               | NA       |
| unknown      | NA | NA       | NA       | SJC_S001386 | NA  | NA    | NA | Sjp_0079120.1 | catalytic activity               | 0.035844 |
| unknown      | NA | NA       | NA       | SJC_S001387 | NA  | NA    | NA | Sjp_0079130.1 | transcription regulator activity | NA       |
| unknown      | NA | NA       | NA       | SJC_S001387 | NA  | NA    | NA | Sjp_0079140.1 | transporter activity             | 0.782    |
| unknown      | NA | NA       | NA       | SJC_S001387 | NA  | NA    | NA | Sjp_0079150.1 | NA                               | NA       |
| HSB10kb_1141 | WZ | 29299727 | 29339912 | SJC_S001388 | 348 | 28140 | -  | Sjp_0079160.1 | catalytic activity               | 0.035844 |
| unknown      | NA | NA       | NA       | SJC_S001389 | NA  | NA    | NA | Sjp_0079170.1 | NA                               | NA       |
| unknown      | NA | NA       | NA       | SJC_S001389 | NA  | NA    | NA | Sjp_0079180.1 | NA                               | NA       |
| HSB10kb_1142 | WZ | 14419275 | 14460312 | SJC_S001390 | 562 | 34367 | -  | Sjp_0079190.1 | binding                          | 0.052762 |
| HSB10kb_1142 | WZ | 14419275 | 14460312 | SJC_S001390 | 562 | 34367 | -  | Sjp_0079200.1 | catalytic activity               | 0.035844 |
| unknown      | NA | NA       | NA       | SJC_S001391 | NA  | NA    | NA | Sjp_0079210.1 | NA                               | NA       |
| unknown      | NA | NA       | NA       | SJC_S001392 | NA  | NA    | NA | Sjp_0079220.1 | metabolic process                | 0.41934  |
| unknown      | NA | NA       | NA       | SJC_S001393 | NA  | NA    | NA | Sjp_0079230.1 | NA                               | NA       |
| unknown      | NA | NA       | NA       | SJC_S001393 | NA  | NA    | NA | Sjp_0079240.1 | catalytic activity               | 0.035844 |
| HSB10kb_1143 | WZ | 14351454 | 14400170 | SJC_S001394 | 716 | 57871 | +  | Sjp_0079250.1 | NA                               | NA       |
| HSB10kb_1143 | WZ | 14351454 | 14400170 | SJC_S001394 | 716 | 57871 | +  | Sjp_0079260.1 | cellular process                 | 0.63852  |
| HSB10kb_1143 | WZ | 14351454 | 14400170 | SJC_S001394 | 716 | 57871 | +  | Sjp_0079270.1 | NA                               | NA       |
| HSB10kb_1143 | WZ | 14351454 | 14400170 | SJC_S001394 | 716 | 57871 | +  | Sjp_0079280.1 | catalytic activity               | 0.035844 |
| unknown      | NA | NA       | NA       | SJC_S001395 | NA  | NA    | NA | Sjp_0079290.1 | NA                               | NA       |
| unknown      | NA | NA       | NA       | SJC_S001396 | NA  | NA    | NA | Sjp_0079300.1 | binding                          | 0.052762 |
| unknown      | NA | NA       | NA       | SJC_S001398 | NA  | NA    | NA | Sjp_0079310.1 | NA                               | NA       |

|              |    |         |         |             |      |       |    |               |                                               |          |
|--------------|----|---------|---------|-------------|------|-------|----|---------------|-----------------------------------------------|----------|
| unknown      | NA | NA      | NA      | SJC_S001399 | NA   | NA    | NA | Sjp_0079320.1 | biological regulation                         | 0.76396  |
| unknown      | NA | NA      | NA      | SJC_S001400 | NA   | NA    | NA | Sjp_0079330.1 | NA                                            | NA       |
| unknown      | NA | NA      | NA      | SJC_S001400 | NA   | NA    | NA | Sjp_0079340.1 | catalytic activity                            | 0.035844 |
| unknown      | NA | NA      | NA      | SJC_S001401 | NA   | NA    | NA | Sjp_0079350.1 | NA                                            | NA       |
| unknown      | NA | NA      | NA      | SJC_S001402 | NA   | NA    | NA | Sjp_0079360.1 | NA                                            | NA       |
| unknown      | NA | NA      | NA      | SJC_S001403 | NA   | NA    | NA | Sjp_0079370.1 | NA                                            | NA       |
| unknown      | NA | NA      | NA      | SJC_S001407 | NA   | NA    | NA | Sjp_0079380.1 | NA                                            | NA       |
| HSB10kb_1144 | WZ | 9954361 | 9976929 | SJC_S001408 | 7831 | 32865 | +  | Sjp_0079390.1 | NA                                            | NA       |
| unknown      | NA | NA      | NA      | SJC_S001410 | NA   | NA    | NA | Sjp_0079400.1 | catalytic activity                            | 0.035844 |
| unknown      | NA | NA      | NA      | SJC_S001412 | NA   | NA    | NA | Sjp_0079410.1 | NA                                            | NA       |
| unknown      | NA | NA      | NA      | SJC_S001412 | NA   | NA    | NA | Sjp_0079420.1 | NA                                            | NA       |
| unknown      | NA | NA      | NA      | SJC_S001413 | NA   | NA    | NA | Sjp_0079430.1 | NA                                            | NA       |
| unknown      | NA | NA      | NA      | SJC_S001414 | NA   | NA    | NA | Sjp_0079440.1 | cellular component organization or biogenesis | NA       |
| unknown      | NA | NA      | NA      | SJC_S001414 | NA   | NA    | NA | Sjp_0079450.1 | NA                                            | NA       |
| unknown      | NA | NA      | NA      | SJC_S001414 | NA   | NA    | NA | Sjp_0079460.1 | cell part                                     | 0.009037 |
| unknown      | NA | NA      | NA      | SJC_S001414 | NA   | NA    | NA | Sjp_0079470.1 | NA                                            | NA       |
| unknown      | NA | NA      | NA      | SJC_S001415 | NA   | NA    | NA | Sjp_0079480.1 | NA                                            | NA       |
| unknown      | NA | NA      | NA      | SJC_S001416 | NA   | NA    | NA | Sjp_0079490.1 | cell part                                     | 0.009037 |
| HSB10kb_1145 | WZ | 2051270 | 2065090 | SJC_S001417 | 2001 | 14820 | +  | Sjp_0079500.1 | enzyme regulator activity                     | 0.1755   |
| unknown      | NA | NA      | NA      | SJC_S001418 | NA   | NA    | NA | Sjp_0079510.1 | NA                                            | NA       |
| unknown      | NA | NA      | NA      | SJC_S001418 | NA   | NA    | NA | Sjp_0079520.1 | NA                                            | NA       |
| unknown      | NA | NA      | NA      | SJC_S001418 | NA   | NA    | NA | Sjp_0079530.1 | biological regulation                         | 0.76396  |
| unknown      | NA | NA      | NA      | SJC_S001419 | NA   | NA    | NA | Sjp_0079540.1 | NA                                            | NA       |
| unknown      | NA | NA      | NA      | SJC_S001419 | NA   | NA    | NA | Sjp_0079550.1 | biological regulation                         | 0.76396  |
| unknown      | NA | NA      | NA      | SJC_S001420 | NA   | NA    | NA | Sjp_0079560.1 | cell part                                     | 0.009037 |
| unknown      | NA | NA      | NA      | SJC_S001420 | NA   | NA    | NA | Sjp_0079570.1 | establishment                                 | NA       |

|              |    |          |          |             |       |       |    |               |                           |          |
|--------------|----|----------|----------|-------------|-------|-------|----|---------------|---------------------------|----------|
|              |    |          |          |             |       |       |    |               | of localization           |          |
| unknown      | NA | NA       | NA       | SJC_S001421 | NA    | NA    | NA | Sjp_0079580.1 | biological regulation     | 0.76396  |
| unknown      | NA | NA       | NA       | SJC_S001421 | NA    | NA    | NA | Sjp_0079590.1 | cell part                 | 0.009037 |
| HSB10kb_1146 | WZ | 9844396  | 9885538  | SJC_S001422 | 448   | 29825 | +  | NA            | NA                        | NA       |
| unknown      | NA | NA       | NA       | SJC_S001422 | NA    | NA    | NA | Sjp_0079600.1 | NA                        | NA       |
| unknown      | NA | NA       | NA       | SJC_S001423 | NA    | NA    | NA | Sjp_0079610.1 | NA                        | NA       |
| unknown      | NA | NA       | NA       | SJC_S001423 | NA    | NA    | NA | Sjp_0079620.1 | NA                        | NA       |
| unknown      | NA | NA       | NA       | SJC_S001423 | NA    | NA    | NA | Sjp_0079630.1 | NA                        | NA       |
| HSB10kb_1147 | WZ | 53699618 | 53715689 | SJC_S001424 | 10835 | 24514 | +  | Sjp_0079640.1 | NA                        | NA       |
| unknown      | NA | NA       | NA       | SJC_S001425 | NA    | NA    | NA | Sjp_0079650.1 | NA                        | NA       |
| unknown      | NA | NA       | NA       | SJC_S001426 | NA    | NA    | NA | Sjp_0079660.1 | enzyme regulator activity | 0.1755   |
| HSB10kb_1148 | 1  | 33841052 | 33884749 | SJC_S001427 | 4930  | 51461 | +  | Sjp_0079680.1 | NA                        | NA       |
| HSB10kb_1148 | 1  | 33841052 | 33884749 | SJC_S001427 | 4930  | 51461 | +  | Sjp_0079690.1 | NA                        | NA       |
| HSB10kb_1148 | 1  | 33841052 | 33884749 | SJC_S001427 | 4930  | 51461 | +  | Sjp_0079700.1 | NA                        | NA       |
| unknown      | NA | NA       | NA       | SJC_S001429 | NA    | NA    | NA | Sjp_0079710.1 | NA                        | NA       |
| unknown      | NA | NA       | NA       | SJC_S001431 | NA    | NA    | NA | Sjp_0079720.1 | NA                        | NA       |
| unknown      | NA | NA       | NA       | SJC_S001431 | NA    | NA    | NA | Sjp_0079730.1 | NA                        | NA       |
| unknown      | NA | NA       | NA       | SJC_S001432 | NA    | NA    | NA | Sjp_0079740.1 | binding                   | 0.052762 |
| unknown      | NA | NA       | NA       | SJC_S001435 | NA    | NA    | NA | Sjp_0079750.1 | NA                        | NA       |
| unknown      | NA | NA       | NA       | SJC_S001436 | NA    | NA    | NA | Sjp_0079760.1 | catalytic activity        | 0.035844 |
| unknown      | NA | NA       | NA       | SJC_S001438 | NA    | NA    | NA | Sjp_0079770.1 | NA                        | NA       |
| unknown      | NA | NA       | NA       | SJC_S001439 | NA    | NA    | NA | Sjp_0079780.1 | transporter activity      | 0.782    |
| unknown      | NA | NA       | NA       | SJC_S001441 | NA    | NA    | NA | Sjp_0079790.1 | NA                        | NA       |
| unknown      | NA | NA       | NA       | SJC_S001442 | NA    | NA    | NA | Sjp_0079800.1 | NA                        | NA       |
| unknown      | NA | NA       | NA       | SJC_S001444 | NA    | NA    | NA | Sjp_0079810.1 | NA                        | NA       |
| unknown      | NA | NA       | NA       | SJC_S001444 | NA    | NA    | NA | Sjp_0079820.1 | catalytic activity        | 0.035844 |
| unknown      | NA | NA       | NA       | SJC_S001445 | NA    | NA    | NA | Sjp_0079830.1 | NA                        | NA       |
| unknown      | NA | NA       | NA       | SJC_S001446 | NA    | NA    | NA | Sjp_0079840.1 | catalytic activity        | 0.035844 |
| unknown      | NA | NA       | NA       | SJC_S001446 | NA    | NA    | NA | Sjp_0079850.1 | catalytic activity        | 0.035844 |
| unknown      | NA | NA       | NA       | SJC_S001448 | NA    | NA    | NA | Sjp_0079860.1 | NA                        | NA       |



|              |    |          |          |             |       |       |    |               |                       |          |
|--------------|----|----------|----------|-------------|-------|-------|----|---------------|-----------------------|----------|
| unknown      | NA | NA       | NA       | SJC_S001449 | NA    | NA    | NA | Sjp_0079870.1 | NA                    | NA       |
| unknown      | NA | NA       | NA       | SJC_S001449 | NA    | NA    | NA | Sjp_0079880.1 | catalytic activity    | 0.035844 |
| unknown      | NA | NA       | NA       | SJC_S001450 | NA    | NA    | NA | Sjp_0079890.1 | catalytic activity    | 0.035844 |
| unknown      | NA | NA       | NA       | SJC_S001450 | NA    | NA    | NA | Sjp_0079900.1 | NA                    | NA       |
| HSB10kb_1149 | WZ | 29181229 | 29210040 | SJC_S001451 | 21931 | 44166 | -  | Sjp_0079910.1 | cell part             | 0.009037 |
| HSB10kb_1149 | WZ | 29181229 | 29210040 | SJC_S001451 | 21931 | 44166 | -  | Sjp_0079920.1 | NA                    | NA       |
| unknown      | NA | NA       | NA       | SJC_S001451 | NA    | NA    | NA | Sjp_0079930.1 | NA                    | NA       |
| unknown      | NA | NA       | NA       | SJC_S001452 | NA    | NA    | NA | Sjp_0079950.1 | cell part             | 0.009037 |
| unknown      | NA | NA       | NA       | SJC_S001454 | NA    | NA    | NA | Sjp_0079960.1 | NA                    | NA       |
| unknown      | NA | NA       | NA       | SJC_S001455 | NA    | NA    | NA | Sjp_0079970.1 | binding               | 0.052762 |
| unknown      | NA | NA       | NA       | SJC_S001455 | NA    | NA    | NA | Sjp_0079980.1 | binding               | 0.052762 |
| unknown      | NA | NA       | NA       | SJC_S001455 | NA    | NA    | NA | Sjp_0079990.1 | binding               | 0.052762 |
| unknown      | NA | NA       | NA       | SJC_S001456 | NA    | NA    | NA | Sjp_0080000.1 | biological regulation | 0.76396  |
| unknown      | NA | NA       | NA       | SJC_S001456 | NA    | NA    | NA | Sjp_0080010.1 | NA                    | NA       |
| unknown      | NA | NA       | NA       | SJC_S001456 | NA    | NA    | NA | Sjp_0080020.1 | NA                    | NA       |
| unknown      | NA | NA       | NA       | SJC_S001456 | NA    | NA    | NA | Sjp_0080030.1 | cell part             | 0.009037 |
| unknown      | NA | NA       | NA       | SJC_S001457 | NA    | NA    | NA | Sjp_0080040.1 | NA                    | NA       |
| HSB10kb_1150 | 7  | 9343938  | 9355263  | SJC_S001460 | 9454  | 21942 | -  | Sjp_0080050.1 | NA                    | NA       |
| unknown      | NA | NA       | NA       | SJC_S001462 | NA    | NA    | NA | Sjp_0080060.1 | NA                    | NA       |
| HSB10kb_1151 | 1  | 41932183 | 41964370 | SJC_S001465 | 9637  | 32323 | -  | Sjp_0080070.1 | NA                    | NA       |
| unknown      | NA | NA       | NA       | SJC_S001466 | NA    | NA    | NA | Sjp_0080080.1 | catalytic activity    | 0.035844 |
| HSB10kb_1152 | 6  | 17776978 | 17793929 | SJC_S001466 | 15928 | 26590 | +  | Sjp_0080090.1 | NA                    | NA       |
| unknown      | NA | NA       | NA       | SJC_S001466 | NA    | NA    | NA | Sjp_0080100.1 | NA                    | NA       |
| unknown      | NA | NA       | NA       | SJC_S001469 | NA    | NA    | NA | Sjp_0080110.1 | NA                    | NA       |
| unknown      | NA | NA       | NA       | SJC_S001471 | NA    | NA    | NA | Sjp_0080120.1 | biological regulation | 0.76396  |
| unknown      | NA | NA       | NA       | SJC_S001475 | NA    | NA    | NA | Sjp_0080130.1 | cell part             | 0.009037 |
| unknown      | NA | NA       | NA       | SJC_S001475 | NA    | NA    | NA | Sjp_0080140.1 | cell part             | 0.009037 |
| unknown      | NA | NA       | NA       | SJC_S001476 | NA    | NA    | NA | Sjp_0080150.1 | NA                    | NA       |
| unknown      | NA | NA       | NA       | SJC_S001476 | NA    | NA    | NA | Sjp_0080160.1 | NA                    | NA       |
| unknown      | NA | NA       | NA       | SJC_S001477 | NA    | NA    | NA | Sjp_0080170.1 | NA                    | NA       |
| HSB10kb_1153 | WZ | 24734292 | 24752572 | SJC_S001479 | 4606  | 20069 | +  | Sjp_0080180.1 | NA                    | NA       |
| HSB10kb_1154 | WZ | 39240079 | 39287447 | SJC_S001480 | 28400 | 72403 | -  | Sjp_0080190.1 | cellular process      | 0.63852  |

|              |    |          |          |             |       |       |    |               |                                               |          |
|--------------|----|----------|----------|-------------|-------|-------|----|---------------|-----------------------------------------------|----------|
| HSB10kb_1154 | WZ | 39240079 | 39287447 | SJC_S001480 | 28400 | 72403 | -  | Sjp_0080200.1 | NA                                            | NA       |
| unknown      | NA | NA       | NA       | SJC_S001483 | NA    | NA    | NA | Sjp_0080210.1 | NA                                            | NA       |
| unknown      | NA | NA       | NA       | SJC_S001485 | NA    | NA    | NA | Sjp_0080220.1 | catalytic activity                            | 0.035844 |
| unknown      | NA | NA       | NA       | SJC_S001486 | NA    | NA    | NA | Sjp_0080230.1 | NA                                            | NA       |
| unknown      | NA | NA       | NA       | SJC_S001486 | NA    | NA    | NA | Sjp_0080240.1 | NA                                            | NA       |
| unknown      | NA | NA       | NA       | SJC_S001488 | NA    | NA    | NA | Sjp_0080250.1 | NA                                            | NA       |
| unknown      | NA | NA       | NA       | SJC_S001488 | NA    | NA    | NA | Sjp_0080260.1 | NA                                            | NA       |
| unknown      | NA | NA       | NA       | SJC_S001489 | NA    | NA    | NA | Sjp_0080270.1 | NA                                            | NA       |
| unknown      | NA | NA       | NA       | SJC_S001490 | NA    | NA    | NA | Sjp_0080280.1 | NA                                            | NA       |
| unknown      | NA | NA       | NA       | SJC_S001491 | NA    | NA    | NA | Sjp_0080290.1 | NA                                            | NA       |
| HSB10kb_1155 | WZ | 24764029 | 24793934 | SJC_S001492 | 2794  | 31285 | -  | Sjp_0080300.1 | NA                                            | NA       |
| HSB10kb_1156 | WZ | 41503099 | 41519479 | SJC_S001493 | 640   | 20881 | +  | Sjp_0080310.1 | catalytic activity                            | 0.035844 |
| unknown      | NA | NA       | NA       | SJC_S001494 | NA    | NA    | NA | Sjp_0080320.1 | NA                                            | NA       |
| unknown      | NA | NA       | NA       | SJC_S001495 | NA    | NA    | NA | Sjp_0080330.1 | biological regulation                         | 0.76396  |
| unknown      | NA | NA       | NA       | SJC_S001496 | NA    | NA    | NA | Sjp_0080340.1 | transporter activity                          | 0.782    |
| unknown      | NA | NA       | NA       | SJC_S001497 | NA    | NA    | NA | Sjp_0080350.1 | NA                                            | NA       |
| unknown      | NA | NA       | NA       | SJC_S001500 | NA    | NA    | NA | Sjp_0080360.1 | NA                                            | NA       |
| unknown      | NA | NA       | NA       | SJC_S001504 | NA    | NA    | NA | Sjp_0080370.1 | NA                                            | NA       |
| unknown      | NA | NA       | NA       | SJC_S001507 | NA    | NA    | NA | Sjp_0080380.1 | NA                                            | NA       |
| unknown      | NA | NA       | NA       | SJC_S001513 | NA    | NA    | NA | Sjp_0080390.1 | NA                                            | NA       |
| unknown      | NA | NA       | NA       | SJC_S001513 | NA    | NA    | NA | Sjp_0080400.1 | NA                                            | NA       |
| unknown      | NA | NA       | NA       | SJC_S001514 | NA    | NA    | NA | Sjp_0080410.1 | NA                                            | NA       |
| unknown      | NA | NA       | NA       | SJC_S001515 | NA    | NA    | NA | Sjp_0080420.1 | binding                                       | 0.052762 |
| unknown      | NA | NA       | NA       | SJC_S001515 | NA    | NA    | NA | Sjp_0080430.1 | cellular component organization or biogenesis | NA       |
| HSB10kb_1157 | WZ | 16733947 | 16748056 | SJC_S001516 | 3040  | 15619 | +  | NA            | NA                                            | NA       |
| unknown      | NA | NA       | NA       | SJC_S001521 | NA    | NA    | NA | Sjp_0080440.1 | NA                                            | NA       |
| HSB10kb_1158 | 6  | 5793927  | 5811285  | SJC_S001522 | 1464  | 14864 | -  | Sjp_0080450.1 | binding                                       | 0.052762 |
| HSB10kb_1158 | 6  | 5793927  | 5811285  | SJC_S001522 | 1464  | 14864 | -  | Sjp_0080460.1 | NA                                            | NA       |
| unknown      | NA | NA       | NA       | SJC_S001523 | NA    | NA    | NA | Sjp_0080470.1 | transporter                                   | 0.782    |

|              |    |          |          |             |      |       |    |               |                                        |          |
|--------------|----|----------|----------|-------------|------|-------|----|---------------|----------------------------------------|----------|
|              |    |          |          |             |      |       |    |               | activity                               |          |
| unknown      | NA | NA       | NA       | SJC_S001527 | NA   | NA    | NA | Sjp_0080490.1 | NA                                     | NA       |
| unknown      | NA | NA       | NA       | SJC_S001529 | NA   | NA    | NA | Sjp_0080500.1 | NA                                     | NA       |
| unknown      | NA | NA       | NA       | SJC_S001529 | NA   | NA    | NA | Sjp_0080510.1 | NA                                     | NA       |
| unknown      | NA | NA       | NA       | SJC_S001530 | NA   | NA    | NA | Sjp_0080520.1 | NA                                     | NA       |
| unknown      | NA | NA       | NA       | SJC_S001531 | NA   | NA    | NA | Sjp_0080530.1 | NA                                     | NA       |
| unknown      | NA | NA       | NA       | SJC_S001533 | NA   | NA    | NA | Sjp_0080540.1 | transcription<br>regulator<br>activity | NA       |
| unknown      | NA | NA       | NA       | SJC_S001533 | NA   | NA    | NA | Sjp_0080550.1 | NA                                     | NA       |
| unknown      | NA | NA       | NA       | SJC_S001533 | NA   | NA    | NA | Sjp_0080560.1 | binding                                | 0.052762 |
| unknown      | NA | NA       | NA       | SJC_S001536 | NA   | NA    | NA | Sjp_0080570.1 | binding                                | 0.052762 |
| unknown      | NA | NA       | NA       | SJC_S001537 | NA   | NA    | NA | Sjp_0080580.1 | NA                                     | NA       |
| unknown      | NA | NA       | NA       | SJC_S001538 | NA   | NA    | NA | Sjp_0080590.1 | binding                                | 0.052762 |
| unknown      | NA | NA       | NA       | SJC_S001539 | NA   | NA    | NA | Sjp_0080600.1 | NA                                     | NA       |
| unknown      | NA | NA       | NA       | SJC_S001541 | NA   | NA    | NA | Sjp_0080610.1 | cell part                              | 0.009037 |
| unknown      | NA | NA       | NA       | SJC_S001542 | NA   | NA    | NA | Sjp_0080620.1 | binding                                | 0.052762 |
| unknown      | NA | NA       | NA       | SJC_S001546 | NA   | NA    | NA | Sjp_0080630.1 | NA                                     | NA       |
| unknown      | NA | NA       | NA       | SJC_S001547 | NA   | NA    | NA | Sjp_0080640.1 | NA                                     | NA       |
| unknown      | NA | NA       | NA       | SJC_S001548 | NA   | NA    | NA | Sjp_0080650.1 | NA                                     | NA       |
| unknown      | NA | NA       | NA       | SJC_S001549 | NA   | NA    | NA | Sjp_0080660.1 | binding                                | 0.052762 |
| unknown      | NA | NA       | NA       | SJC_S001549 | NA   | NA    | NA | Sjp_0080670.1 | transporter<br>activity                | 0.782    |
| unknown      | NA | NA       | NA       | SJC_S001550 | NA   | NA    | NA | Sjp_0080680.1 | NA                                     | NA       |
| unknown      | NA | NA       | NA       | SJC_S001551 | NA   | NA    | NA | Sjp_0080690.1 | NA                                     | NA       |
| unknown      | NA | NA       | NA       | SJC_S001553 | NA   | NA    | NA | Sjp_0080700.1 | NA                                     | NA       |
| HSB10kb_1159 | WZ | 19595970 | 19627504 | SJC_S001555 | 5745 | 23801 | -  | Sjp_0080710.1 | catalytic activity                     | 0.035844 |
| HSB10kb_1159 | WZ | 19595970 | 19627504 | SJC_S001555 | 5745 | 23801 | -  | Sjp_0080720.1 | NA                                     | NA       |
| HSB10kb_1159 | WZ | 19595970 | 19627504 | SJC_S001555 | 5745 | 23801 | -  | Sjp_0080730.1 | catalytic activity                     | 0.035844 |
| unknown      | NA | NA       | NA       | SJC_S001557 | NA   | NA    | NA | Sjp_0080740.1 | NA                                     | NA       |
| unknown      | NA | NA       | NA       | SJC_S001558 | NA   | NA    | NA | Sjp_0080750.1 | molecular<br>transducer<br>activity    | 0.50162  |
| unknown      | NA | NA       | NA       | SJC_S001559 | NA   | NA    | NA | Sjp_0080760.1 | transporter                            | 0.782    |

|              |    |          |          |             |       |        |    |               |                       |          |
|--------------|----|----------|----------|-------------|-------|--------|----|---------------|-----------------------|----------|
|              |    |          |          |             |       |        |    |               | activity              |          |
| unknown      | NA | NA       | NA       | SJC_S001559 | NA    | NA     | NA | Sjp_0080770.1 | transporter activity  | 0.782    |
| unknown      | NA | NA       | NA       | SJC_S001559 | NA    | NA     | NA | Sjp_0080780.1 | NA                    | NA       |
| unknown      | NA | NA       | NA       | SJC_S001559 | NA    | NA     | NA | Sjp_0080790.1 | metabolic process     | 0.41934  |
| unknown      | NA | NA       | NA       | SJC_S001559 | NA    | NA     | NA | Sjp_0080800.1 | binding               | 0.052762 |
| unknown      | NA | NA       | NA       | SJC_S001559 | NA    | NA     | NA | Sjp_0080810.1 | NA                    | NA       |
| HSB10kb_1160 | 1  | 19584934 | 19856489 | SJC_S001560 | 1012  | 233498 | +  | Sjp_0080820.1 | NA                    | NA       |
| HSB10kb_1160 | 1  | 19584934 | 19856489 | SJC_S001560 | 1012  | 233498 | +  | Sjp_0080830.1 | cell part             | 0.009037 |
| HSB10kb_1160 | 1  | 19584934 | 19856489 | SJC_S001560 | 1012  | 233498 | +  | Sjp_0080840.1 | NA                    | NA       |
| HSB10kb_1160 | 1  | 19584934 | 19856489 | SJC_S001560 | 1012  | 233498 | +  | Sjp_0080850.1 | NA                    | NA       |
| HSB10kb_1160 | 1  | 19584934 | 19856489 | SJC_S001560 | 1012  | 233498 | +  | Sjp_0080860.1 | NA                    | NA       |
| HSB10kb_1160 | 1  | 19584934 | 19856489 | SJC_S001560 | 1012  | 233498 | +  | Sjp_0080870.1 | NA                    | NA       |
| HSB10kb_1160 | 1  | 19584934 | 19856489 | SJC_S001560 | 1012  | 233498 | +  | Sjp_0080880.1 | NA                    | NA       |
| unknown      | NA | NA       | NA       | SJC_S001560 | NA    | NA     | NA | Sjp_0080890.1 | NA                    | NA       |
| unknown      | NA | NA       | NA       | SJC_S001560 | NA    | NA     | NA | Sjp_0080900.1 | NA                    | NA       |
| unknown      | NA | NA       | NA       | SJC_S001560 | NA    | NA     | NA | Sjp_0080910.1 | cell part             | 0.009037 |
| unknown      | NA | NA       | NA       | SJC_S001561 | NA    | NA     | NA | Sjp_0080920.1 | NA                    | NA       |
| unknown      | NA | NA       | NA       | SJC_S001561 | NA    | NA     | NA | Sjp_0080930.1 | NA                    | NA       |
| HSB10kb_1161 | 3  | 2760276  | 2822841  | SJC_S001561 | 74097 | 146303 | +  | Sjp_0080940.1 | biological regulation | 0.76396  |
| HSB10kb_1161 | 3  | 2760276  | 2822841  | SJC_S001561 | 74097 | 146303 | +  | Sjp_0080950.1 | cell part             | 0.009037 |
| HSB10kb_1161 | 3  | 2760276  | 2822841  | SJC_S001561 | 74097 | 146303 | +  | Sjp_0080960.1 | catalytic activity    | 0.035844 |
| unknown      | NA | NA       | NA       | SJC_S001561 | NA    | NA     | NA | Sjp_0080970.1 | catalytic activity    | 0.035844 |
| unknown      | NA | NA       | NA       | SJC_S001561 | NA    | NA     | NA | Sjp_0080980.1 | cell part             | 0.009037 |
| HSB10kb_1162 | 2  | 3747437  | 3783808  | SJC_S001562 | 35772 | 62165  | -  | Sjp_0080990.1 | cell part             | 0.009037 |
| HSB10kb_1162 | 2  | 3747437  | 3783808  | SJC_S001562 | 35772 | 62165  | -  | Sjp_0081000.1 | binding               | 0.052762 |
| unknown      | NA | NA       | NA       | SJC_S001563 | NA    | NA     | NA | Sjp_0081010.1 | NA                    | NA       |
| unknown      | NA | NA       | NA       | SJC_S001563 | NA    | NA     | NA | Sjp_0081020.1 | cell part             | 0.009037 |
| HSB10kb_1163 | 1  | 13302626 | 13322009 | SJC_S001563 | 79049 | 92457  | -  | Sjp_0081030.1 | NA                    | NA       |
| unknown      | NA | NA       | NA       | SJC_S001563 | NA    | NA     | NA | Sjp_0081040.1 | NA                    | NA       |
| unknown      | NA | NA       | NA       | SJC_S001564 | NA    | NA     | NA | Sjp_0081050.1 | NA                    | NA       |
| unknown      | NA | NA       | NA       | SJC_S001564 | NA    | NA     | NA | Sjp_0081060.1 | NA                    | NA       |

|              |       |          |          |             |       |        |    |               |                       |          |
|--------------|-------|----------|----------|-------------|-------|--------|----|---------------|-----------------------|----------|
| unknown      | NA    | NA       | NA       | SJC_S001564 | NA    | NA     | NA | Sjp_0081070.1 | NA                    | NA       |
| unknown      | NA    | NA       | NA       | SJC_S001564 | NA    | NA     | NA | Sjp_0081080.1 | NA                    | NA       |
| unknown      | NA    | NA       | NA       | SJC_S001565 | NA    | NA     | NA | Sjp_0081090.1 | catalytic activity    | 0.035844 |
| unknown      | NA    | NA       | NA       | SJC_S001566 | NA    | NA     | NA | Sjp_0081100.1 | cellular process      | 0.63852  |
| unknown      | NA    | NA       | NA       | SJC_S001566 | NA    | NA     | NA | Sjp_0081110.1 | catalytic activity    | 0.035844 |
| unknown      | NA    | NA       | NA       | SJC_S001566 | NA    | NA     | NA | Sjp_0081120.1 | NA                    | NA       |
| unknown      | NA    | NA       | NA       | SJC_S001566 | NA    | NA     | NA | Sjp_0081130.1 | biological regulation | 0.76396  |
| unknown      | NA    | NA       | NA       | SJC_S001566 | NA    | NA     | NA | Sjp_0081140.1 | binding               | 0.052762 |
| unknown      | NA    | NA       | NA       | SJC_S001566 | NA    | NA     | NA | Sjp_0081150.1 | NA                    | NA       |
| unknown      | NA    | NA       | NA       | SJC_S001567 | NA    | NA     | NA | Sjp_0081160.1 | biological regulation | 0.76396  |
| HSB10kb_1164 | WZ    | 51842407 | 51962257 | SJC_S001567 | 27388 | 123535 | +  | Sjp_0081170.1 | biological regulation | 0.76396  |
| HSB10kb_1164 | WZ    | 51842407 | 51962257 | SJC_S001567 | 27388 | 123535 | +  | Sjp_0081180.1 | NA                    | NA       |
| HSB10kb_1164 | WZ    | 51842407 | 51962257 | SJC_S001567 | 27388 | 123535 | +  | Sjp_0081190.1 | NA                    | NA       |
| HSB10kb_1165 | 5     | 1469390  | 1487746  | SJC_S001568 | 6812  | 27094  | -  | Sjp_0081200.1 | transporter activity  | 0.782    |
| HSB10kb_1165 | 5     | 1469390  | 1487746  | SJC_S001568 | 6812  | 27094  | -  | Sjp_0081210.1 | binding               | 0.052762 |
| EBR10kb_470  | "5,2" | NA       | NA       | SJC_S001568 | 27095 | 41356  | NA | Sjp_0081210.1 | binding               | 0.052762 |
| EBR10kb_470  | "5,2" | NA       | NA       | SJC_S001568 | 27095 | 41356  | NA | Sjp_0081220.1 | cell part             | 0.009037 |
| EBR10kb_470  | "5,2" | NA       | NA       | SJC_S001568 | 27095 | 41356  | NA | Sjp_0081230.1 | cell part             | 0.009037 |
| HSB10kb_1166 | 2     | 10825062 | 10856849 | SJC_S001568 | 41357 | 75417  | -  | Sjp_0081230.1 | cell part             | 0.009037 |
| HSB10kb_1166 | 2     | 10825062 | 10856849 | SJC_S001568 | 41357 | 75417  | -  | Sjp_0081240.1 | binding               | 0.052762 |
| unknown      | NA    | NA       | NA       | SJC_S001569 | NA    | NA     | NA | Sjp_0081250.1 | NA                    | NA       |
| unknown      | NA    | NA       | NA       | SJC_S001569 | NA    | NA     | NA | Sjp_0081260.1 | NA                    | NA       |
| unknown      | NA    | NA       | NA       | SJC_S001569 | NA    | NA     | NA | Sjp_0081270.1 | NA                    | NA       |
| HSB10kb_1167 | 5     | 5168494  | 5190909  | SJC_S001570 | 5566  | 24652  | -  | Sjp_0081280.1 | catalytic activity    | 0.035844 |
| HSB10kb_1168 | 1     | 40264868 | 40414705 | SJC_S001571 | 3073  | 78263  | +  | Sjp_0081290.1 | NA                    | NA       |
| HSB10kb_1168 | 1     | 40264868 | 40414705 | SJC_S001571 | 3073  | 78263  | +  | Sjp_0081300.1 | NA                    | NA       |
| unknown      | NA    | NA       | NA       | SJC_S001571 | NA    | NA     | NA | Sjp_0081310.1 | catalytic activity    | 0.035844 |
| unknown      | NA    | NA       | NA       | SJC_S001572 | NA    | NA     | NA | Sjp_0081340.1 | NA                    | NA       |
| unknown      | NA    | NA       | NA       | SJC_S001572 | NA    | NA     | NA | Sjp_0081350.1 | catalytic activity    | 0.035844 |
| unknown      | NA    | NA       | NA       | SJC_S001573 | NA    | NA     | NA | Sjp_0081360.1 | NA                    | NA       |

|              |    |          |          |             |       |       |    |               |                               |          |
|--------------|----|----------|----------|-------------|-------|-------|----|---------------|-------------------------------|----------|
| unknown      | NA | NA       | NA       | SJC_S001573 | NA    | NA    | NA | Sjp_0081370.1 | NA                            | NA       |
| HSB10kb_1169 | 3  | 9141214  | 9169233  | SJC_S001574 | 15624 | 29995 | -  | Sjp_0081380.1 | NA                            | NA       |
| HSB10kb_1169 | 3  | 9141214  | 9169233  | SJC_S001574 | 15624 | 29995 | -  | Sjp_0081390.1 | NA                            | NA       |
| HSB10kb_1169 | 3  | 9141214  | 9169233  | SJC_S001574 | 15624 | 29995 | -  | Sjp_0081400.1 | NA                            | NA       |
| unknown      | NA | NA       | NA       | SJC_S001574 | NA    | NA    | NA | Sjp_0081410.1 | NA                            | NA       |
| unknown      | NA | NA       | NA       | SJC_S001574 | NA    | NA    | NA | Sjp_0081420.1 | biological regulation         | 0.76396  |
| HSB10kb_1170 | 6  | 5122655  | 5153270  | SJC_S001575 | 8042  | 35163 | +  | Sjp_0081430.1 | catalytic activity            | 0.035844 |
| HSB10kb_1170 | 6  | 5122655  | 5153270  | SJC_S001575 | 8042  | 35163 | +  | Sjp_0081440.1 | NA                            | NA       |
| HSB10kb_1170 | 6  | 5122655  | 5153270  | SJC_S001575 | 8042  | 35163 | +  | Sjp_0081450.1 | NA                            | NA       |
| HSB10kb_1171 | 4  | 16918048 | 16953166 | SJC_S001577 | 5368  | 48063 | +  | Sjp_0081470.1 | cell part                     | 0.009037 |
| HSB10kb_1172 | 1  | 8353489  | 8371183  | SJC_S001578 | 3318  | 24506 | +  | Sjp_0081480.1 | NA                            | NA       |
| unknown      | NA | NA       | NA       | SJC_S001578 | NA    | NA    | NA | Sjp_0081490.1 | NA                            | NA       |
| unknown      | NA | NA       | NA       | SJC_S001579 | NA    | NA    | NA | Sjp_0081500.1 | NA                            | NA       |
| unknown      | NA | NA       | NA       | SJC_S001579 | NA    | NA    | NA | Sjp_0081510.1 | NA                            | NA       |
| unknown      | NA | NA       | NA       | SJC_S001580 | NA    | NA    | NA | Sjp_0081520.1 | NA                            | NA       |
| unknown      | NA | NA       | NA       | SJC_S001580 | NA    | NA    | NA | Sjp_0081530.1 | receptor regulator activity   | NA       |
| unknown      | NA | NA       | NA       | SJC_S001580 | NA    | NA    | NA | Sjp_0081540.1 | NA                            | NA       |
| unknown      | NA | NA       | NA       | SJC_S001581 | NA    | NA    | NA | Sjp_0081550.1 | NA                            | NA       |
| unknown      | NA | NA       | NA       | SJC_S001582 | NA    | NA    | NA | Sjp_0081560.1 | NA                            | NA       |
| unknown      | NA | NA       | NA       | SJC_S001582 | NA    | NA    | NA | Sjp_0081570.1 | cell part                     | 0.009037 |
| HSB10kb_1173 | 4  | 24105243 | 24130479 | SJC_S001583 | 36746 | 56208 |    | Sjp_0081580.1 | NA                            | NA       |
| HSB10kb_1174 | 1  | 8881666  | 8901779  | SJC_S001584 | 33189 | 62115 | -  | Sjp_0081590.1 | NA                            | NA       |
| unknown      | NA | NA       | NA       | SJC_S001585 | NA    | NA    | NA | Sjp_0081600.1 | NA                            | NA       |
| unknown      | NA | NA       | NA       | SJC_S001585 | NA    | NA    | NA | Sjp_0081610.1 | NA                            | NA       |
| unknown      | NA | NA       | NA       | SJC_S001586 | NA    | NA    | NA | Sjp_0081620.1 | molecular transducer activity | 0.50162  |
| unknown      | NA | NA       | NA       | SJC_S001587 | NA    | NA    | NA | Sjp_0081630.1 | response to stimulus          | NA       |
| HSB10kb_1175 | WZ | 25895558 | 25934123 | SJC_S001588 | 3228  | 13385 | +  | Sjp_0081640.1 | NA                            | NA       |
| HSB10kb_1175 | WZ | 25895558 | 25934123 | SJC_S001588 | 3228  | 13385 | +  | Sjp_0081650.1 | cell part                     | 0.009037 |

|              |    |          |          |             |      |       |    |               |                                               |          |
|--------------|----|----------|----------|-------------|------|-------|----|---------------|-----------------------------------------------|----------|
| HSB10kb_1175 | WZ | 25895558 | 25934123 | SJC_S001588 | 3228 | 13385 | +  | Sjp_0081660.1 | catalytic activity                            | 0.035844 |
| unknown      | NA | NA       | NA       | SJC_S001588 | NA   | NA    | NA | Sjp_0081670.1 | biological regulation                         | 0.76396  |
| unknown      | NA | NA       | NA       | SJC_S001588 | NA   | NA    | NA | Sjp_0081680.1 | cellular component organization or biogenesis | NA       |
| unknown      | NA | NA       | NA       | SJC_S001588 | NA   | NA    | NA | Sjp_0081690.1 | catalytic activity                            | 0.035844 |
| unknown      | NA | NA       | NA       | SJC_S001588 | NA   | NA    | NA | Sjp_0081700.1 | cellular component organization or biogenesis | NA       |
| unknown      | NA | NA       | NA       | SJC_S001589 | NA   | NA    | NA | Sjp_0081710.1 | biological regulation                         | 0.76396  |
| unknown      | NA | NA       | NA       | SJC_S001589 | NA   | NA    | NA | Sjp_0081720.1 | NA                                            | NA       |
| unknown      | NA | NA       | NA       | SJC_S001590 | NA   | NA    | NA | Sjp_0081730.1 | NA                                            | NA       |
| unknown      | NA | NA       | NA       | SJC_S001590 | NA   | NA    | NA | Sjp_0081740.1 | NA                                            | NA       |
| unknown      | NA | NA       | NA       | SJC_S001590 | NA   | NA    | NA | Sjp_0081750.1 | virion part                                   | NA       |
| HSB10kb_1176 | 3  | 22907594 | 22925077 | SJC_S001591 | 9316 | 35425 | +  | Sjp_0081760.1 | catalytic activity                            | 0.035844 |
| HSB10kb_1176 | 3  | 22907594 | 22925077 | SJC_S001591 | 9316 | 35425 | +  | Sjp_0081770.1 | catalytic activity                            | 0.035844 |
| unknown      | NA | NA       | NA       | SJC_S001591 | NA   | NA    | NA | Sjp_0081780.1 | NA                                            | NA       |
| unknown      | NA | NA       | NA       | SJC_S001593 | NA   | NA    | NA | Sjp_0081790.1 | NA                                            | NA       |
| unknown      | NA | NA       | NA       | SJC_S001593 | NA   | NA    | NA | Sjp_0081800.1 | NA                                            | NA       |
| unknown      | NA | NA       | NA       | SJC_S001595 | NA   | NA    | NA | Sjp_0081820.1 | biological regulation                         | 0.76396  |
| unknown      | NA | NA       | NA       | SJC_S001596 | NA   | NA    | NA | Sjp_0081840.1 | catalytic activity                            | 0.035844 |
| unknown      | NA | NA       | NA       | SJC_S001597 | NA   | NA    | NA | Sjp_0081850.1 | NA                                            | NA       |
| unknown      | NA | NA       | NA       | SJC_S001597 | NA   | NA    | NA | Sjp_0081860.1 | NA                                            | NA       |
| unknown      | NA | NA       | NA       | SJC_S001598 | NA   | NA    | NA | Sjp_0081870.1 | NA                                            | NA       |
| unknown      | NA | NA       | NA       | SJC_S001600 | NA   | NA    | NA | Sjp_0081880.1 | NA                                            | NA       |
| unknown      | NA | NA       | NA       | SJC_S001600 | NA   | NA    | NA | Sjp_0081890.1 | NA                                            | NA       |
| unknown      | NA | NA       | NA       | SJC_S001602 | NA   | NA    | NA | Sjp_0081900.1 | NA                                            | NA       |
| HSB10kb_1177 | 6  | 17344365 | 17363486 | SJC_S001604 | 3576 | 27005 | +  | Sjp_0081920.1 | catalytic activity                            | 0.035844 |
| unknown      | NA | NA       | NA       | SJC_S001605 | NA   | NA    | NA | Sjp_0081930.1 | catalytic activity                            | 0.035844 |

|              |    |          |          |             |       |       |    |               |                               |          |
|--------------|----|----------|----------|-------------|-------|-------|----|---------------|-------------------------------|----------|
| HSB10kb_1178 | WZ | 28683368 | 28708024 | SJC_S001606 | 13507 | 39445 | -  | Sjp_0081940.1 | molecular transducer activity | 0.50162  |
| HSB10kb_1178 | WZ | 28683368 | 28708024 | SJC_S001606 | 13507 | 39445 | -  | Sjp_0081950.1 | catalytic activity            | 0.035844 |
| HSB10kb_1178 | WZ | 28683368 | 28708024 | SJC_S001606 | 13507 | 39445 | -  | Sjp_0081960.1 | NA                            | NA       |
| HSB10kb_1178 | WZ | 28683368 | 28708024 | SJC_S001606 | 13507 | 39445 | -  | Sjp_0081970.1 | NA                            | NA       |
| HSB10kb_1178 | WZ | 28683368 | 28708024 | SJC_S001606 | 13507 | 39445 | -  | Sjp_0081980.1 | NA                            | NA       |
| unknown      | NA | NA       | NA       | SJC_S001606 | NA    | NA    | NA | Sjp_0081990.1 | enzyme regulator activity     | 0.1755   |
| HSB10kb_1179 | 4  | 28069162 | 28084932 | SJC_S001608 | 18756 | 36546 | +  | Sjp_0082000.1 | NA                            | NA       |
| unknown      | NA | NA       | NA       | SJC_S001609 | NA    | NA    | NA | Sjp_0082010.1 | catalytic activity            | 0.035844 |
| HSB10kb_1180 | 2  | 5328197  | 5349335  | SJC_S001610 | 16504 | 37904 | -  | Sjp_0082020.1 | catalytic activity            | 0.035844 |
| unknown      | NA | NA       | NA       | SJC_S001612 | NA    | NA    | NA | Sjp_0082030.1 | biological regulation         | 0.76396  |
| unknown      | NA | NA       | NA       | SJC_S001612 | NA    | NA    | NA | Sjp_0082040.1 | biological regulation         | 0.76396  |
| unknown      | NA | NA       | NA       | SJC_S001613 | NA    | NA    | NA | Sjp_0082050.1 | NA                            | NA       |
| unknown      | NA | NA       | NA       | SJC_S001613 | NA    | NA    | NA | Sjp_0082060.1 | NA                            | NA       |
| unknown      | NA | NA       | NA       | SJC_S001613 | NA    | NA    | NA | Sjp_0082070.1 | NA                            | NA       |
| HSB10kb_1181 | 6  | 6554762  | 6577853  | SJC_S001615 | 5772  | 30707 | -  | Sjp_0082080.1 | binding                       | 0.052762 |
| unknown      | NA | NA       | NA       | SJC_S001616 | NA    | NA    | NA | Sjp_0082090.1 | cellular process              | 0.63852  |
| unknown      | NA | NA       | NA       | SJC_S001617 | NA    | NA    | NA | Sjp_0082100.1 | cell part                     | 0.009037 |
| unknown      | NA | NA       | NA       | SJC_S001617 | NA    | NA    | NA | Sjp_0082110.1 | NA                            | NA       |
| unknown      | NA | NA       | NA       | SJC_S001621 | NA    | NA    | NA | Sjp_0082120.1 | binding                       | 0.052762 |
| unknown      | NA | NA       | NA       | SJC_S001622 | NA    | NA    | NA | Sjp_0082130.1 | biological regulation         | 0.76396  |
| HSB10kb_1182 | 3  | 22881897 | 22895458 | SJC_S001622 | 8458  | 20743 |    | Sjp_0082140.1 | catalytic activity            | 0.035844 |
| unknown      | NA | NA       | NA       | SJC_S001623 | NA    | NA    | NA | Sjp_0082150.1 | NA                            | NA       |
| unknown      | NA | NA       | NA       | SJC_S001624 | NA    | NA    | NA | Sjp_0082160.1 | NA                            | NA       |
| unknown      | NA | NA       | NA       | SJC_S001624 | NA    | NA    | NA | Sjp_0082170.1 | binding                       | 0.052762 |
| unknown      | NA | NA       | NA       | SJC_S001628 | NA    | NA    | NA | Sjp_0082190.1 | NA                            | NA       |
| unknown      | NA | NA       | NA       | SJC_S001628 | NA    | NA    | NA | Sjp_0082200.1 | transporter activity          | 0.782    |



|              |    |          |          |             |       |       |    |               |                       |          |
|--------------|----|----------|----------|-------------|-------|-------|----|---------------|-----------------------|----------|
| unknown      | NA | NA       | NA       | SJC_S001629 | NA    | NA    | NA | Sjp_0082210.1 | NA                    | NA       |
| unknown      | NA | NA       | NA       | SJC_S001630 | NA    | NA    | NA | Sjp_0082220.1 | NA                    | NA       |
| unknown      | NA | NA       | NA       | SJC_S001631 | NA    | NA    | NA | Sjp_0082230.1 | biological regulation | 0.76396  |
| unknown      | NA | NA       | NA       | SJC_S001631 | NA    | NA    | NA | Sjp_0082240.1 | cell part             | 0.009037 |
| unknown      | NA | NA       | NA       | SJC_S001631 | NA    | NA    | NA | Sjp_0082250.1 | NA                    | NA       |
| unknown      | NA | NA       | NA       | SJC_S001632 | NA    | NA    | NA | Sjp_0082260.1 | NA                    | NA       |
| unknown      | NA | NA       | NA       | SJC_S001632 | NA    | NA    | NA | Sjp_0082270.1 | NA                    | NA       |
| unknown      | NA | NA       | NA       | SJC_S001632 | NA    | NA    | NA | Sjp_0082280.1 | NA                    | NA       |
| unknown      | NA | NA       | NA       | SJC_S001633 | NA    | NA    | NA | Sjp_0082290.1 | NA                    | NA       |
| unknown      | NA | NA       | NA       | SJC_S001633 | NA    | NA    | NA | Sjp_0082300.1 | NA                    | NA       |
| unknown      | NA | NA       | NA       | SJC_S001633 | NA    | NA    | NA | Sjp_0082310.1 | catalytic activity    | 0.035844 |
| unknown      | NA | NA       | NA       | SJC_S001633 | NA    | NA    | NA | Sjp_0082320.1 | NA                    | NA       |
| HSB10kb_1183 | 5  | 1816845  | 1887203  | SJC_S001634 | 2660  | 44095 | -  | Sjp_0082330.1 | catalytic activity    | 0.035844 |
| HSB10kb_1183 | 5  | 1816845  | 1887203  | SJC_S001634 | 2660  | 44095 | -  | Sjp_0082340.1 | cellular process      | 0.63852  |
| HSB10kb_1183 | 5  | 1816845  | 1887203  | SJC_S001634 | 2660  | 44095 | -  | Sjp_0082350.1 | binding               | 0.052762 |
| unknown      | NA | NA       | NA       | SJC_S001635 | NA    | NA    | NA | Sjp_0082360.1 | NA                    | NA       |
| unknown      | NA | NA       | NA       | SJC_S001637 | NA    | NA    | NA | Sjp_0082370.1 | NA                    | NA       |
| unknown      | NA | NA       | NA       | SJC_S001637 | NA    | NA    | NA | Sjp_0082380.1 | NA                    | NA       |
| unknown      | NA | NA       | NA       | SJC_S001638 | NA    | NA    | NA | Sjp_0082390.1 | binding               | 0.052762 |
| unknown      | NA | NA       | NA       | SJC_S001639 | NA    | NA    | NA | Sjp_0082400.1 | NA                    | NA       |
| HSB10kb_1184 | WZ | 29038047 | 29055894 | SJC_S001640 | 1777  | 20066 | -  | Sjp_0082410.1 | cell part             | 0.009037 |
| unknown      | NA | NA       | NA       | SJC_S001641 | NA    | NA    | NA | Sjp_0082420.1 | NA                    | NA       |
| unknown      | NA | NA       | NA       | SJC_S001642 | NA    | NA    | NA | Sjp_0082430.1 | binding               | 0.052762 |
| unknown      | NA | NA       | NA       | SJC_S001643 | NA    | NA    | NA | Sjp_0082440.1 | NA                    | NA       |
| unknown      | NA | NA       | NA       | SJC_S001644 | NA    | NA    | NA | Sjp_0082450.1 | NA                    | NA       |
| unknown      | NA | NA       | NA       | SJC_S001645 | NA    | NA    | NA | Sjp_0082460.1 | NA                    | NA       |
| unknown      | NA | NA       | NA       | SJC_S001645 | NA    | NA    | NA | Sjp_0082470.1 | NA                    | NA       |
| unknown      | NA | NA       | NA       | SJC_S001648 | NA    | NA    | NA | Sjp_0082480.1 | catalytic activity    | 0.035844 |
| unknown      | NA | NA       | NA       | SJC_S001649 | NA    | NA    | NA | Sjp_0082490.1 | NA                    | NA       |
| unknown      | NA | NA       | NA       | SJC_S001649 | NA    | NA    | NA | Sjp_0082500.1 | NA                    | NA       |
| unknown      | NA | NA       | NA       | SJC_S001649 | NA    | NA    | NA | Sjp_0082510.1 | NA                    | NA       |
| unknown      | NA | NA       | NA       | SJC_S001650 | NA    | NA    | NA | Sjp_0082520.1 | NA                    | NA       |
| HSB10kb_1185 | 2  | 33887670 | 33900028 | SJC_S001652 | 12289 | 24172 | -  | Sjp_0082530.1 | NA                    | NA       |

|              |    |          |          |             |       |       |    |               |                                  |          |
|--------------|----|----------|----------|-------------|-------|-------|----|---------------|----------------------------------|----------|
| HSB10kb_1185 | 2  | 33887670 | 33900028 | SJC_S001652 | 12289 | 24172 | -  | Sjp_0082540.1 | NA                               | NA       |
| unknown      | NA | NA       | NA       | SJC_S001653 | NA    | NA    | NA | Sjp_0082550.1 | catalytic activity               | 0.035844 |
| unknown      | NA | NA       | NA       | SJC_S001655 | NA    | NA    | NA | Sjp_0082570.1 | NA                               | NA       |
| unknown      | NA | NA       | NA       | SJC_S001656 | NA    | NA    | NA | Sjp_0082580.1 | transporter activity             | 0.782    |
| unknown      | NA | NA       | NA       | SJC_S001658 | NA    | NA    | NA | Sjp_0082590.1 | binding                          | 0.052762 |
| unknown      | NA | NA       | NA       | SJC_S001659 | NA    | NA    | NA | Sjp_0082600.1 | death                            | NA       |
| unknown      | NA | NA       | NA       | SJC_S001659 | NA    | NA    | NA | Sjp_0082610.1 | NA                               | NA       |
| unknown      | NA | NA       | NA       | SJC_S001659 | NA    | NA    | NA | Sjp_0082620.1 | NA                               | NA       |
| unknown      | NA | NA       | NA       | SJC_S001659 | NA    | NA    | NA | Sjp_0082630.1 | NA                               | NA       |
| HSB10kb_1186 | WZ | 45154961 | 45192697 | SJC_S001660 | 1055  | 27678 | +  | Sjp_0082640.1 | NA                               | NA       |
| HSB10kb_1186 | WZ | 45154961 | 45192697 | SJC_S001660 | 1055  | 27678 | +  | Sjp_0082650.1 | NA                               | NA       |
| unknown      | NA | NA       | NA       | SJC_S001661 | NA    | NA    | NA | Sjp_0082660.1 | NA                               | NA       |
| HSB10kb_1187 | WZ | 48078487 | 48105577 | SJC_S001661 | 6717  | 27360 | -  | Sjp_0082670.1 | catalytic activity               | 0.035844 |
| unknown      | NA | NA       | NA       | SJC_S001664 | NA    | NA    | NA | Sjp_0082680.1 | NA                               | NA       |
| unknown      | NA | NA       | NA       | SJC_S001665 | NA    | NA    | NA | Sjp_0082690.1 | biological regulation            | 0.76396  |
| unknown      | NA | NA       | NA       | SJC_S001666 | NA    | NA    | NA | Sjp_0082700.1 | NA                               | NA       |
| unknown      | NA | NA       | NA       | SJC_S001666 | NA    | NA    | NA | Sjp_0082710.1 | NA                               | NA       |
| unknown      | NA | NA       | NA       | SJC_S001670 | NA    | NA    | NA | Sjp_0082720.1 | NA                               | NA       |
| unknown      | NA | NA       | NA       | SJC_S001674 | NA    | NA    | NA | Sjp_0082730.1 | binding                          | 0.052762 |
| unknown      | NA | NA       | NA       | SJC_S001674 | NA    | NA    | NA | Sjp_0082740.1 | biological regulation            | 0.76396  |
| HSB10kb_1188 | WZ | 29064391 | 29082836 | SJC_S001675 | 5240  | 31997 | +  | Sjp_0082750.1 | NA                               | NA       |
| unknown      | NA | NA       | NA       | SJC_S001676 | NA    | NA    | NA | Sjp_0082760.1 | binding                          | 0.052762 |
| unknown      | NA | NA       | NA       | SJC_S001676 | NA    | NA    | NA | Sjp_0082770.1 | NA                               | NA       |
| unknown      | NA | NA       | NA       | SJC_S001678 | NA    | NA    | NA | Sjp_0082780.1 | catalytic activity               | 0.035844 |
| unknown      | NA | NA       | NA       | SJC_S001680 | NA    | NA    | NA | Sjp_0082790.1 | NA                               | NA       |
| unknown      | NA | NA       | NA       | SJC_S001680 | NA    | NA    | NA | Sjp_0082800.1 | biological regulation            | 0.76396  |
| unknown      | NA | NA       | NA       | SJC_S001680 | NA    | NA    | NA | Sjp_0082810.1 | transcription regulator activity | NA       |
| unknown      | NA | NA       | NA       | SJC_S001681 | NA    | NA    | NA | Sjp_0082820.1 | NA                               | NA       |

|              |    |          |          |             |        |        |    |               |                                               |          |
|--------------|----|----------|----------|-------------|--------|--------|----|---------------|-----------------------------------------------|----------|
| unknown      | NA | NA       | NA       | SJC_S001682 | NA     | NA     | NA | Sjp_0082830.1 | transporter activity                          | 0.782    |
| unknown      | NA | NA       | NA       | SJC_S001683 | NA     | NA     | NA | Sjp_0082840.1 | NA                                            | NA       |
| unknown      | NA | NA       | NA       | SJC_S001683 | NA     | NA     | NA | Sjp_0082850.1 | NA                                            | NA       |
| unknown      | NA | NA       | NA       | SJC_S001686 | NA     | NA     | NA | Sjp_0082860.1 | NA                                            | NA       |
| unknown      | NA | NA       | NA       | SJC_S001687 | NA     | NA     | NA | Sjp_0082870.1 | NA                                            | NA       |
| HSB10kb_1189 | 1  | 41126000 | 41140838 | SJC_S001688 | 1338   | 15350  |    | Sjp_0082880.1 | NA                                            | NA       |
| unknown      | NA | NA       | NA       | SJC_S001689 | NA     | NA     | NA | Sjp_0082890.1 | binding                                       | 0.052762 |
| HSB10kb_1190 | 2  | 4837774  | 4977233  | SJC_S001690 | 13584  | 188028 | -  | Sjp_0082900.1 | binding                                       | 0.052762 |
| HSB10kb_1190 | 2  | 4837774  | 4977233  | SJC_S001690 | 13584  | 188028 | -  | Sjp_0082910.1 | biological regulation                         | 0.76396  |
| HSB10kb_1190 | 2  | 4837774  | 4977233  | SJC_S001690 | 13584  | 188028 | -  | Sjp_0082920.1 | NA                                            | NA       |
| HSB10kb_1190 | 2  | 4837774  | 4977233  | SJC_S001690 | 13584  | 188028 | -  | Sjp_0082930.1 | NA                                            | NA       |
| HSB10kb_1190 | 2  | 4837774  | 4977233  | SJC_S001690 | 13584  | 188028 | -  | Sjp_0082940.1 | NA                                            | NA       |
| HSB10kb_1190 | 2  | 4837774  | 4977233  | SJC_S001690 | 13584  | 188028 | -  | Sjp_0082950.1 | transporter activity                          | 0.782    |
| HSB10kb_1190 | 2  | 4837774  | 4977233  | SJC_S001690 | 13584  | 188028 | -  | Sjp_0082960.1 | NA                                            | NA       |
| HSB10kb_1191 | 1  | 37242336 | 37365713 | SJC_S001691 | 134751 | 234985 | -  | Sjp_0082970.1 | NA                                            | NA       |
| HSB10kb_1191 | 1  | 37242336 | 37365713 | SJC_S001691 | 134751 | 234985 | -  | Sjp_0082980.1 | catalytic activity                            | 0.035844 |
| HSB10kb_1191 | 1  | 37242336 | 37365713 | SJC_S001691 | 134751 | 234985 | -  | Sjp_0082990.1 | cellular process                              | 0.63852  |
| HSB10kb_1192 | 4  | 5954552  | 6108272  | SJC_S001692 | 1725   | 144082 | +  | Sjp_0083000.1 | protein binding transcription factor activity | NA       |
| HSB10kb_1192 | 4  | 5954552  | 6108272  | SJC_S001692 | 1725   | 144082 | +  | Sjp_0083010.1 | NA                                            | NA       |
| HSB10kb_1192 | 4  | 5954552  | 6108272  | SJC_S001692 | 1725   | 144082 | +  | Sjp_0083020.1 | NA                                            | NA       |
| HSB10kb_1193 | 7  | 692787   | 746567   | SJC_S001693 | 14880  | 59518  | +  | Sjp_0083040.1 | NA                                            | NA       |
| HSB10kb_1193 | 7  | 692787   | 746567   | SJC_S001693 | 14880  | 59518  | +  | Sjp_0083050.1 | enzyme regulator activity                     | 0.1755   |
| unknown      | NA | NA       | NA       | SJC_S001693 | NA     | NA     | NA | Sjp_0083060.1 | NA                                            | NA       |
| HSB10kb_1194 | 1  | 56579441 | 56755716 | SJC_S001694 | 5857   | 173747 | -  | Sjp_0083070.1 | catalytic activity                            | 0.035844 |
| HSB10kb_1194 | 1  | 56579441 | 56755716 | SJC_S001694 | 5857   | 173747 | -  | Sjp_0083080.1 | NA                                            | NA       |
| HSB10kb_1194 | 1  | 56579441 | 56755716 | SJC_S001694 | 5857   | 173747 | -  | Sjp_0083090.1 | NA                                            | NA       |
| HSB10kb_1194 | 1  | 56579441 | 56755716 | SJC_S001694 | 5857   | 173747 | -  | Sjp_0083100.1 | transporter                                   | 0.782    |

|              |    |          |          |             |       |        |    |               |                                               |          |
|--------------|----|----------|----------|-------------|-------|--------|----|---------------|-----------------------------------------------|----------|
|              |    |          |          |             |       |        |    |               | activity                                      |          |
| HSB10kb_1194 | 1  | 56579441 | 56755716 | SJC_S001694 | 5857  | 173747 | -  | Sjp_0083110.1 | transporter activity                          | 0.782    |
| unknown      | NA | NA       | NA       | SJC_S001695 | NA    | NA     | NA | Sjp_0083120.1 | NA                                            | NA       |
| unknown      | NA | NA       | NA       | SJC_S001696 | NA    | NA     | NA | Sjp_0083130.1 | enzyme regulator activity                     | 0.1755   |
| unknown      | NA | NA       | NA       | SJC_S001697 | NA    | NA     | NA | Sjp_0083140.1 | electron carrier activity                     | NA       |
| unknown      | NA | NA       | NA       | SJC_S001697 | NA    | NA     | NA | Sjp_0083160.1 | NA                                            | NA       |
| unknown      | NA | NA       | NA       | SJC_S001697 | NA    | NA     | NA | Sjp_0083170.1 | catalytic activity                            | 0.035844 |
| unknown      | NA | NA       | NA       | SJC_S001697 | NA    | NA     | NA | Sjp_0083180.1 | virion part                                   | NA       |
| unknown      | NA | NA       | NA       | SJC_S001697 | NA    | NA     | NA | Sjp_0083190.1 | developmental process                         | NA       |
| HSB10kb_1195 | 1  | 50477844 | 50629753 | SJC_S001698 | 20080 | 75925  | -  | Sjp_0083200.1 | NA                                            | NA       |
| HSB10kb_1195 | 1  | 50477844 | 50629753 | SJC_S001698 | 20080 | 75925  | -  | Sjp_0083210.1 | NA                                            | NA       |
| HSB10kb_1195 | 1  | 50477844 | 50629753 | SJC_S001698 | 20080 | 75925  | -  | Sjp_0083220.1 | NA                                            | NA       |
| HSB10kb_1195 | 1  | 50477844 | 50629753 | SJC_S001698 | 20080 | 75925  | -  | Sjp_0083230.1 | NA                                            | NA       |
| unknown      | NA | NA       | NA       | SJC_S001699 | NA    | NA     | NA | Sjp_0083240.1 | NA                                            | NA       |
| unknown      | NA | NA       | NA       | SJC_S001699 | NA    | NA     | NA | Sjp_0083250.1 | NA                                            | NA       |
| unknown      | NA | NA       | NA       | SJC_S001700 | NA    | NA     | NA | Sjp_0083260.1 | NA                                            | NA       |
| unknown      | NA | NA       | NA       | SJC_S001700 | NA    | NA     | NA | Sjp_0083270.1 | cellular component organization or biogenesis | NA       |
| unknown      | NA | NA       | NA       | SJC_S001700 | NA    | NA     | NA | Sjp_0083280.1 | NA                                            | NA       |
| unknown      | NA | NA       | NA       | SJC_S001700 | NA    | NA     | NA | Sjp_0083290.1 | catalytic activity                            | 0.035844 |
| unknown      | NA | NA       | NA       | SJC_S001701 | NA    | NA     | NA | Sjp_0083300.1 | NA                                            | NA       |
| unknown      | NA | NA       | NA       | SJC_S001701 | NA    | NA     | NA | Sjp_0083310.1 | binding                                       | 0.052762 |
| unknown      | NA | NA       | NA       | SJC_S001701 | NA    | NA     | NA | Sjp_0083320.1 | cell part                                     | 0.009037 |
| unknown      | NA | NA       | NA       | SJC_S001702 | NA    | NA     | NA | Sjp_0083330.1 | NA                                            | NA       |
| unknown      | NA | NA       | NA       | SJC_S001702 | NA    | NA     | NA | Sjp_0083340.1 | response to stimulus                          | NA       |
| unknown      | NA | NA       | NA       | SJC_S001703 | NA    | NA     | NA | Sjp_0083350.1 | NA                                            | NA       |

|              |       |          |          |             |       |        |    |               |                               |          |
|--------------|-------|----------|----------|-------------|-------|--------|----|---------------|-------------------------------|----------|
| unknown      | NA    | NA       | NA       | SJC_S001703 | NA    | NA     | NA | Sjp_0083360.1 | NA                            | NA       |
| unknown      | NA    | NA       | NA       | SJC_S001704 | NA    | NA     | NA | Sjp_0083370.1 | NA                            | NA       |
| unknown      | NA    | NA       | NA       | SJC_S001704 | NA    | NA     | NA | Sjp_0083380.1 | NA                            | NA       |
| HSB10kb_1196 | 3     | 25578888 | 25593965 | SJC_S001705 | 2550  | 12566  | -  | Sjp_0083390.1 | NA                            | NA       |
| EBR10kb_471  | "3,3" | NA       | NA       | SJC_S001705 | 12567 | 92333  | NA | Sjp_0083390.1 | NA                            | NA       |
| EBR10kb_471  | "3,3" | NA       | NA       | SJC_S001705 | 12567 | 92333  | NA | Sjp_0083400.1 | NA                            | NA       |
| EBR10kb_471  | "3,3" | NA       | NA       | SJC_S001705 | 12567 | 92333  | NA | Sjp_0083410.1 | NA                            | NA       |
| HSB10kb_1197 | 3     | 25439815 | 25507148 | SJC_S001705 | 92334 | 160630 | -  | Sjp_0083410.1 | NA                            | NA       |
| HSB10kb_1197 | 3     | 25439815 | 25507148 | SJC_S001705 | 92334 | 160630 | -  | Sjp_0083420.1 | NA                            | NA       |
| HSB10kb_1197 | 3     | 25439815 | 25507148 | SJC_S001705 | 92334 | 160630 | -  | Sjp_0083430.1 | NA                            | NA       |
| HSB10kb_1198 | 3     | 26197554 | 26233449 | SJC_S001706 | 1352  | 25500  |    | Sjp_0083440.1 | NA                            | NA       |
| unknown      | NA    | NA       | NA       | SJC_S001707 | NA    | NA     | NA | Sjp_0083450.1 | NA                            | NA       |
| HSB10kb_1199 | WZ    | 52280686 | 52341336 | SJC_S001708 | 2666  | 64954  | +  | Sjp_0083460.1 | catalytic activity            | 0.035844 |
| HSB10kb_1199 | WZ    | 52280686 | 52341336 | SJC_S001708 | 2666  | 64954  | +  | Sjp_0083470.1 | catalytic activity            | 0.035844 |
| unknown      | NA    | NA       | NA       | SJC_S001708 | NA    | NA     | NA | Sjp_0083480.1 | NA                            | NA       |
| unknown      | NA    | NA       | NA       | SJC_S001709 | NA    | NA     | NA | Sjp_0083490.1 | NA                            | NA       |
| unknown      | NA    | NA       | NA       | SJC_S001709 | NA    | NA     | NA | Sjp_0083500.1 | NA                            | NA       |
| unknown      | NA    | NA       | NA       | SJC_S001710 | NA    | NA     | NA | Sjp_0083510.1 | catalytic activity            | 0.035844 |
| HSB10kb_1200 | 1     | 9475560  | 9507078  | SJC_S001711 | 6943  | 21648  | -  | Sjp_0083520.1 | NA                            | NA       |
| unknown      | NA    | NA       | NA       | SJC_S001712 | NA    | NA     | NA | Sjp_0083530.1 | NA                            | NA       |
| unknown      | NA    | NA       | NA       | SJC_S001712 | NA    | NA     | NA | Sjp_0083540.1 | NA                            | NA       |
| unknown      | NA    | NA       | NA       | SJC_S001713 | NA    | NA     | NA | Sjp_0083550.1 | NA                            | NA       |
| unknown      | NA    | NA       | NA       | SJC_S001713 | NA    | NA     | NA | Sjp_0083560.1 | NA                            | NA       |
| unknown      | NA    | NA       | NA       | SJC_S001714 | NA    | NA     | NA | Sjp_0083570.1 | molecular transducer activity | 0.50162  |
| unknown      | NA    | NA       | NA       | SJC_S001714 | NA    | NA     | NA | Sjp_0083580.1 | binding                       | 0.052762 |
| unknown      | NA    | NA       | NA       | SJC_S001715 | NA    | NA     | NA | Sjp_0083590.1 | NA                            | NA       |
| unknown      | NA    | NA       | NA       | SJC_S001715 | NA    | NA     | NA | Sjp_0083600.1 | NA                            | NA       |
| unknown      | NA    | NA       | NA       | SJC_S001715 | NA    | NA     | NA | Sjp_0083610.1 | catalytic activity            | 0.035844 |
| unknown      | NA    | NA       | NA       | SJC_S001716 | NA    | NA     | NA | Sjp_0083620.1 | binding                       | 0.052762 |
| unknown      | NA    | NA       | NA       | SJC_S001716 | NA    | NA     | NA | Sjp_0083630.1 | biological regulation         | 0.76396  |
| unknown      | NA    | NA       | NA       | SJC_S001717 | NA    | NA     | NA | Sjp_0083640.1 | NA                            | NA       |

|              |    |          |          |             |       |       |    |               |                                               |          |
|--------------|----|----------|----------|-------------|-------|-------|----|---------------|-----------------------------------------------|----------|
| unknown      | NA | NA       | NA       | SJC_S001717 | NA    | NA    | NA | Sjp_0083650.1 | NA                                            | NA       |
| unknown      | NA | NA       | NA       | SJC_S001718 | NA    | NA    | NA | Sjp_0083660.1 | NA                                            | NA       |
| unknown      | NA | NA       | NA       | SJC_S001718 | NA    | NA    | NA | Sjp_0083670.1 | catalytic activity                            | 0.035844 |
| HSB10kb_1201 | 6  | 18058084 | 18097656 | SJC_S001718 | 24805 | 49018 | -  | Sjp_0083680.1 | binding                                       | 0.052762 |
| HSB10kb_1201 | 6  | 18058084 | 18097656 | SJC_S001718 | 24805 | 49018 | -  | Sjp_0083690.1 | catalytic activity                            | 0.035844 |
| unknown      | NA | NA       | NA       | SJC_S001718 | NA    | NA    | NA | Sjp_0083700.1 | enzyme regulator activity                     | 0.1755   |
| unknown      | NA | NA       | NA       | SJC_S001719 | NA    | NA    | NA | Sjp_0083710.1 | binding                                       | 0.052762 |
| unknown      | NA | NA       | NA       | SJC_S001720 | NA    | NA    | NA | Sjp_0083720.1 | NA                                            | NA       |
| unknown      | NA | NA       | NA       | SJC_S001721 | NA    | NA    | NA | Sjp_0083730.1 | NA                                            | NA       |
| unknown      | NA | NA       | NA       | SJC_S001721 | NA    | NA    | NA | Sjp_0083740.1 | NA                                            | NA       |
| unknown      | NA | NA       | NA       | SJC_S001722 | NA    | NA    | NA | Sjp_0083750.1 | cell part                                     | 0.009037 |
| unknown      | NA | NA       | NA       | SJC_S001723 | NA    | NA    | NA | Sjp_0083760.1 | NA                                            | NA       |
| unknown      | NA | NA       | NA       | SJC_S001724 | NA    | NA    | NA | Sjp_0083770.1 | NA                                            | NA       |
| unknown      | NA | NA       | NA       | SJC_S001727 | NA    | NA    | NA | Sjp_0083780.1 | NA                                            | NA       |
| unknown      | NA | NA       | NA       | SJC_S001727 | NA    | NA    | NA | Sjp_0083790.1 | cell part                                     | 0.009037 |
| HSB10kb_1202 | 1  | 11878400 | 11897975 | SJC_S001728 | 11204 | 42315 | -  | Sjp_0083800.1 | binding                                       | 0.052762 |
| unknown      | NA | NA       | NA       | SJC_S001730 | NA    | NA    | NA | Sjp_0083810.1 | biological regulation                         | 0.76396  |
| unknown      | NA | NA       | NA       | SJC_S001730 | NA    | NA    | NA | Sjp_0083820.1 | NA                                            | NA       |
| unknown      | NA | NA       | NA       | SJC_S001731 | NA    | NA    | NA | Sjp_0083830.1 | NA                                            | NA       |
| unknown      | NA | NA       | NA       | SJC_S001732 | NA    | NA    | NA | Sjp_0083840.1 | cellular process                              | 0.63852  |
| unknown      | NA | NA       | NA       | SJC_S001732 | NA    | NA    | NA | Sjp_0083850.1 | cellular process                              | 0.63852  |
| unknown      | NA | NA       | NA       | SJC_S001732 | NA    | NA    | NA | Sjp_0083860.1 | cellular process                              | 0.63852  |
| HSB10kb_1203 | 1  | 27227998 | 27258379 | SJC_S001732 | 45467 | 83470 | -  | Sjp_0083870.1 | NA                                            | NA       |
| HSB10kb_1203 | 1  | 27227998 | 27258379 | SJC_S001732 | 45467 | 83470 | -  | Sjp_0083880.1 | catalytic activity                            | 0.035844 |
| unknown      | NA | NA       | NA       | SJC_S001733 | NA    | NA    | NA | Sjp_0083890.1 | NA                                            | NA       |
| unknown      | NA | NA       | NA       | SJC_S001733 | NA    | NA    | NA | Sjp_0083910.1 | NA                                            | NA       |
| unknown      | NA | NA       | NA       | SJC_S001736 | NA    | NA    | NA | Sjp_0083920.1 | NA                                            | NA       |
| unknown      | NA | NA       | NA       | SJC_S001736 | NA    | NA    | NA | Sjp_0083930.1 | cellular component organization or biogenesis | NA       |

|              |    |          |          |             |       |        |    |               |                                               |          |
|--------------|----|----------|----------|-------------|-------|--------|----|---------------|-----------------------------------------------|----------|
| unknown      | NA | NA       | NA       | SJC_S001736 | NA    | NA     | NA | Sjp_0083940.1 | NA                                            | NA       |
| unknown      | NA | NA       | NA       | SJC_S001737 | NA    | NA     | NA | Sjp_0083950.1 | NA                                            | NA       |
| unknown      | NA | NA       | NA       | SJC_S001738 | NA    | NA     | NA | Sjp_0083960.1 | NA                                            | NA       |
| unknown      | NA | NA       | NA       | SJC_S001738 | NA    | NA     | NA | Sjp_0083970.1 | NA                                            | NA       |
| unknown      | NA | NA       | NA       | SJC_S001739 | NA    | NA     | NA | Sjp_0083980.1 | response to stimulus                          | NA       |
| HSB10kb_1204 | WZ | 10016708 | 10070442 | SJC_S001740 | 263   | 46191  | +  | Sjp_0083990.1 | NA                                            | NA       |
| HSB10kb_1204 | WZ | 10016708 | 10070442 | SJC_S001740 | 263   | 46191  | +  | Sjp_0084000.1 | catalytic activity                            | 0.035844 |
| HSB10kb_1204 | WZ | 10016708 | 10070442 | SJC_S001740 | 263   | 46191  | +  | Sjp_0084010.1 | NA                                            | NA       |
| unknown      | NA | NA       | NA       | SJC_S001741 | NA    | NA     | NA | Sjp_0084030.1 | NA                                            | NA       |
| unknown      | NA | NA       | NA       | SJC_S001742 | NA    | NA     | NA | Sjp_0084040.1 | cellular process                              | 0.63852  |
| unknown      | NA | NA       | NA       | SJC_S001743 | NA    | NA     | NA | Sjp_0084050.1 | NA                                            | NA       |
| HSB10kb_1205 | WZ | 23678072 | 23690025 | SJC_S001746 | 5353  | 20918  |    | Sjp_0084060.1 | NA                                            | NA       |
| HSB10kb_1206 | 7  | 5363400  | 5402372  | SJC_S001747 | 7792  | 39701  | -  | Sjp_0084070.1 | catalytic activity                            | 0.035844 |
| unknown      | NA | NA       | NA       | SJC_S001749 | NA    | NA     | NA | Sjp_0084080.1 | binding                                       | 0.052762 |
| unknown      | NA | NA       | NA       | SJC_S001750 | NA    | NA     | NA | Sjp_0084090.1 | cellular component organization or biogenesis | NA       |
| unknown      | NA | NA       | NA       | SJC_S001751 | NA    | NA     | NA | Sjp_0084100.1 | catalytic activity                            | 0.035844 |
| unknown      | NA | NA       | NA       | SJC_S001753 | NA    | NA     | NA | Sjp_0084110.1 | cell part                                     | 0.009037 |
| unknown      | NA | NA       | NA       | SJC_S001753 | NA    | NA     | NA | Sjp_0084120.1 | NA                                            | NA       |
| unknown      | NA | NA       | NA       | SJC_S001753 | NA    | NA     | NA | Sjp_0084130.1 | NA                                            | NA       |
| unknown      | NA | NA       | NA       | SJC_S001753 | NA    | NA     | NA | Sjp_0084140.1 | NA                                            | NA       |
| unknown      | NA | NA       | NA       | SJC_S001754 | NA    | NA     | NA | Sjp_0084150.1 | NA                                            | NA       |
| HSB10kb_1207 | 1  | 53347106 | 53481415 | SJC_S001754 | 48502 | 176965 | +  | Sjp_0084160.1 | catalytic activity                            | 0.035844 |
| HSB10kb_1207 | 1  | 53347106 | 53481415 | SJC_S001754 | 48502 | 176965 | +  | Sjp_0084170.1 | NA                                            | NA       |
| HSB10kb_1207 | 1  | 53347106 | 53481415 | SJC_S001754 | 48502 | 176965 | +  | Sjp_0084180.1 | biological regulation                         | 0.76396  |
| HSB10kb_1207 | 1  | 53347106 | 53481415 | SJC_S001754 | 48502 | 176965 | +  | Sjp_0084190.1 | NA                                            | NA       |
| HSB10kb_1207 | 1  | 53347106 | 53481415 | SJC_S001754 | 48502 | 176965 | +  | Sjp_0084200.1 | NA                                            | NA       |
| HSB10kb_1207 | 1  | 53347106 | 53481415 | SJC_S001754 | 48502 | 176965 | +  | Sjp_0084210.1 | NA                                            | NA       |
| HSB10kb_1208 | WZ | 52811357 | 52933121 | SJC_S001755 | 13563 | 161793 | -  | Sjp_0084220.1 | NA                                            | NA       |
| HSB10kb_1208 | WZ | 52811357 | 52933121 | SJC_S001755 | 13563 | 161793 | -  | Sjp_0084230.1 | NA                                            | NA       |

|              |       |          |          |             |        |        |    |               |                               |          |
|--------------|-------|----------|----------|-------------|--------|--------|----|---------------|-------------------------------|----------|
| HSB10kb_1208 | WZ    | 52811357 | 52933121 | SJC_S001755 | 13563  | 161793 | -  | Sjp_0084240.1 | NA                            | NA       |
| HSB10kb_1208 | WZ    | 52811357 | 52933121 | SJC_S001755 | 13563  | 161793 | -  | Sjp_0084250.1 | NA                            | NA       |
| HSB10kb_1208 | WZ    | 52811357 | 52933121 | SJC_S001755 | 13563  | 161793 | -  | Sjp_0084260.1 | catalytic activity            | 0.035844 |
| HSB10kb_1208 | WZ    | 52811357 | 52933121 | SJC_S001755 | 13563  | 161793 | -  | Sjp_0084270.1 | biological regulation         | 0.76396  |
| HSB10kb_1208 | WZ    | 52811357 | 52933121 | SJC_S001755 | 13563  | 161793 | -  | Sjp_0084280.1 | NA                            | NA       |
| unknown      | NA    | NA       | NA       | SJC_S001756 | NA     | NA     | NA | Sjp_0084290.1 | NA                            | NA       |
| unknown      | NA    | NA       | NA       | SJC_S001756 | NA     | NA     | NA | Sjp_0084300.1 | NA                            | NA       |
| unknown      | NA    | NA       | NA       | SJC_S001757 | NA     | NA     | NA | Sjp_0084310.1 | binding                       | 0.052762 |
| unknown      | NA    | NA       | NA       | SJC_S001757 | NA     | NA     | NA | Sjp_0084320.1 | NA                            | NA       |
| HSB10kb_1209 | WZ    | 58846671 | 58895798 | SJC_S001757 | 33047  | 85196  | -  | NA            | NA                            | NA       |
| unknown      | NA    | NA       | NA       | SJC_S001758 | NA     | NA     | NA | Sjp_0084340.1 | NA                            | NA       |
| unknown      | NA    | NA       | NA       | SJC_S001758 | NA     | NA     | NA | Sjp_0084350.1 | NA                            | NA       |
| unknown      | NA    | NA       | NA       | SJC_S001760 | NA     | NA     | NA | Sjp_0084360.1 | NA                            | NA       |
| unknown      | NA    | NA       | NA       | SJC_S001760 | NA     | NA     | NA | Sjp_0084370.1 | molecular transducer activity | 0.50162  |
| unknown      | NA    | NA       | NA       | SJC_S001760 | NA     | NA     | NA | Sjp_0084380.1 | catalytic activity            | 0.035844 |
| unknown      | NA    | NA       | NA       | SJC_S001761 | NA     | NA     | NA | Sjp_0084390.1 | NA                            | NA       |
| HSB10kb_1210 | 3     | 8129246  | 8182151  | SJC_S001762 | 35698  | 88302  |    | NA            | NA                            | NA       |
| unknown      | NA    | NA       | NA       | SJC_S001763 | NA     | NA     | NA | Sjp_0084400.1 | catalytic activity            | 0.035844 |
| unknown      | NA    | NA       | NA       | SJC_S001765 | NA     | NA     | NA | Sjp_0084410.1 | NA                            | NA       |
| HSB10kb_1211 | WZ    | 34949667 | 34995138 | SJC_S001765 | 9189   | 57522  | -  | Sjp_0084420.1 | NA                            | NA       |
| HSB10kb_1211 | WZ    | 34949667 | 34995138 | SJC_S001765 | 9189   | 57522  | -  | Sjp_0084430.1 | NA                            | NA       |
| unknown      | NA    | NA       | NA       | SJC_S001766 | NA     | NA     | NA | Sjp_0084440.1 | NA                            | NA       |
| unknown      | NA    | NA       | NA       | SJC_S001766 | NA     | NA     | NA | Sjp_0084460.1 | biological regulation         | 0.76396  |
| unknown      | NA    | NA       | NA       | SJC_S001766 | NA     | NA     | NA | Sjp_0084470.1 | NA                            | NA       |
| unknown      | NA    | NA       | NA       | SJC_S001767 | NA     | NA     | NA | Sjp_0084480.1 | cellular process              | 0.63852  |
| unknown      | NA    | NA       | NA       | SJC_S001769 | NA     | NA     | NA | Sjp_0084500.1 | NA                            | NA       |
| HSB10kb_1212 | 4     | 9897132  | 9952040  | SJC_S001770 | 2716   | 75883  | +  | NA            | NA                            | NA       |
| EBR10kb_472  | "4,4" | NA       | NA       | SJC_S001770 | 75884  | 110488 | NA | Sjp_0084510.1 | cell part                     | 0.009037 |
| HSB10kb_1213 | 4     | 9826304  | 9845881  | SJC_S001770 | 110489 | 132595 |    | Sjp_0084510.1 | cell part                     | 0.009037 |
| HSB10kb_1213 | 4     | 9826304  | 9845881  | SJC_S001770 | 110489 | 132595 |    | Sjp_0084520.1 | cell part                     | 0.009037 |



|              |       |          |          |             |        |        |    |               |                               |          |
|--------------|-------|----------|----------|-------------|--------|--------|----|---------------|-------------------------------|----------|
| unknown      | NA    | NA       | NA       | SJC_S001771 | NA     | NA     | NA | Sjp_0084530.1 | cell part                     | 0.009037 |
| unknown      | NA    | NA       | NA       | SJC_S001773 | NA     | NA     | NA | Sjp_0084540.1 | binding                       | 0.052762 |
| unknown      | NA    | NA       | NA       | SJC_S001774 | NA     | NA     | NA | Sjp_0084550.1 | NA                            | NA       |
| HSB10kb_1214 | 3     | 9262026  | 9312551  | SJC_S001774 | 37430  | 88924  | +  | Sjp_0084560.1 | NA                            | NA       |
| HSB10kb_1214 | 3     | 9262026  | 9312551  | SJC_S001774 | 37430  | 88924  | +  | Sjp_0084570.1 | NA                            | NA       |
| EBR10kb_473  | "3,3" | NA       | NA       | SJC_S001774 | 88925  | 114890 | NA | Sjp_0084580.1 | catalytic activity            | 0.035844 |
| HSB10kb_1215 | 3     | 9111457  | 9126378  | SJC_S001774 | 114891 | 128647 | -  | Sjp_0084580.1 | catalytic activity            | 0.035844 |
| unknown      | NA    | NA       | NA       | SJC_S001775 | NA     | NA     | NA | Sjp_0084590.1 | NA                            | NA       |
| HSB10kb_1216 | WZ    | 46591362 | 46794943 | SJC_S001775 | 57325  | 205138 | -  | Sjp_0084600.1 | NA                            | NA       |
| HSB10kb_1216 | WZ    | 46591362 | 46794943 | SJC_S001775 | 57325  | 205138 | -  | Sjp_0084610.1 | NA                            | NA       |
| HSB10kb_1216 | WZ    | 46591362 | 46794943 | SJC_S001775 | 57325  | 205138 | -  | Sjp_0084620.1 | NA                            | NA       |
| HSB10kb_1216 | WZ    | 46591362 | 46794943 | SJC_S001775 | 57325  | 205138 | -  | Sjp_0084630.1 | cell part                     | 0.009037 |
| HSB10kb_1216 | WZ    | 46591362 | 46794943 | SJC_S001775 | 57325  | 205138 | -  | Sjp_0084640.1 | NA                            | NA       |
| unknown      | NA    | NA       | NA       | SJC_S001777 | NA     | NA     | NA | Sjp_0084650.1 | NA                            | NA       |
| unknown      | NA    | NA       | NA       | SJC_S001777 | NA     | NA     | NA | Sjp_0084660.1 | NA                            | NA       |
| unknown      | NA    | NA       | NA       | SJC_S001778 | NA     | NA     | NA | Sjp_0084670.1 | cell part                     | 0.009037 |
| unknown      | NA    | NA       | NA       | SJC_S001778 | NA     | NA     | NA | Sjp_0084680.1 | NA                            | NA       |
| unknown      | NA    | NA       | NA       | SJC_S001779 | NA     | NA     | NA | Sjp_0084690.1 | NA                            | NA       |
| unknown      | NA    | NA       | NA       | SJC_S001779 | NA     | NA     | NA | Sjp_0084700.1 | cell part                     | 0.009037 |
| unknown      | NA    | NA       | NA       | SJC_S001779 | NA     | NA     | NA | Sjp_0084710.1 | binding                       | 0.052762 |
| unknown      | NA    | NA       | NA       | SJC_S001779 | NA     | NA     | NA | Sjp_0084720.1 | NA                            | NA       |
| unknown      | NA    | NA       | NA       | SJC_S001780 | NA     | NA     | NA | Sjp_0084730.1 | NA                            | NA       |
| unknown      | NA    | NA       | NA       | SJC_S001780 | NA     | NA     | NA | Sjp_0084740.1 | molecular transducer activity | 0.50162  |
| unknown      | NA    | NA       | NA       | SJC_S001781 | NA     | NA     | NA | Sjp_0084750.1 | NA                            | NA       |
| unknown      | NA    | NA       | NA       | SJC_S001783 | NA     | NA     | NA | Sjp_0084760.1 | NA                            | NA       |
| unknown      | NA    | NA       | NA       | SJC_S001783 | NA     | NA     | NA | Sjp_0084770.1 | NA                            | NA       |
| unknown      | NA    | NA       | NA       | SJC_S001784 | NA     | NA     | NA | Sjp_0084780.1 | NA                            | NA       |
| unknown      | NA    | NA       | NA       | SJC_S001784 | NA     | NA     | NA | Sjp_0084790.1 | NA                            | NA       |
| unknown      | NA    | NA       | NA       | SJC_S001785 | NA     | NA     | NA | Sjp_0084800.1 | NA                            | NA       |
| unknown      | NA    | NA       | NA       | SJC_S001787 | NA     | NA     | NA | Sjp_0084810.1 | cell part                     | 0.009037 |
| unknown      | NA    | NA       | NA       | SJC_S001787 | NA     | NA     | NA | Sjp_0084820.1 | cell part                     | 0.009037 |
| unknown      | NA    | NA       | NA       | SJC_S001789 | NA     | NA     | NA | Sjp_0084840.1 | molecular                     | 0.50162  |

|              |    |          |          |             |        |        |    |               |                                  |          |
|--------------|----|----------|----------|-------------|--------|--------|----|---------------|----------------------------------|----------|
|              |    |          |          |             |        |        |    |               | transducer activity              |          |
| unknown      | NA | NA       | NA       | SJC_S001789 | NA     | NA     | NA | Sjp_0084850.1 | catalytic activity               | 0.035844 |
| unknown      | NA | NA       | NA       | SJC_S001789 | NA     | NA     | NA | Sjp_0084860.1 | reproductive process             | NA       |
| unknown      | NA | NA       | NA       | SJC_S001789 | NA     | NA     | NA | Sjp_0084870.1 | binding                          | 0.052762 |
| unknown      | NA | NA       | NA       | SJC_S001789 | NA     | NA     | NA | Sjp_0084880.1 | NA                               | NA       |
| unknown      | NA | NA       | NA       | SJC_S001789 | NA     | NA     | NA | Sjp_0084890.1 | NA                               | NA       |
| unknown      | NA | NA       | NA       | SJC_S001789 | NA     | NA     | NA | Sjp_0084910.1 | NA                               | NA       |
| HSB10kb_1217 | 1  | 39131611 | 39146819 | SJC_S001789 | 246362 | 260605 | -  | Sjp_0084920.1 | NA                               | NA       |
| unknown      | NA | NA       | NA       | SJC_S001790 | NA     | NA     | NA | Sjp_0084930.1 | cell part                        | 0.009037 |
| unknown      | NA | NA       | NA       | SJC_S001790 | NA     | NA     | NA | Sjp_0084940.1 | catalytic activity               | 0.035844 |
| unknown      | NA | NA       | NA       | SJC_S001791 | NA     | NA     | NA | Sjp_0084950.1 | NA                               | NA       |
| HSB10kb_1218 | WZ | 26328345 | 26396175 | SJC_S001791 | 100324 | 138945 | +  | Sjp_0084960.1 | NA                               | NA       |
| HSB10kb_1218 | WZ | 26328345 | 26396175 | SJC_S001791 | 100324 | 138945 | +  | Sjp_0084970.1 | cell part                        | 0.009037 |
| HSB10kb_1218 | WZ | 26328345 | 26396175 | SJC_S001791 | 100324 | 138945 | +  | Sjp_0084980.1 | transcription regulator activity | NA       |
| HSB10kb_1218 | WZ | 26328345 | 26396175 | SJC_S001791 | 100324 | 138945 | +  | Sjp_0084990.1 | NA                               | NA       |
| HSB10kb_1218 | WZ | 26328345 | 26396175 | SJC_S001791 | 100324 | 138945 | +  | Sjp_0085000.1 | NA                               | NA       |
| unknown      | NA | NA       | NA       | SJC_S001791 | NA     | NA     | NA | Sjp_0085010.1 | catalytic activity               | 0.035844 |
| HSB10kb_1219 | WZ | 6780415  | 6852316  | SJC_S001792 | 29757  | 93380  | +  | Sjp_0085020.1 | NA                               | NA       |
| HSB10kb_1219 | WZ | 6780415  | 6852316  | SJC_S001792 | 29757  | 93380  | +  | Sjp_0085030.1 | cell part                        | 0.009037 |
| HSB10kb_1219 | WZ | 6780415  | 6852316  | SJC_S001792 | 29757  | 93380  | +  | Sjp_0085040.1 | NA                               | NA       |
| HSB10kb_1219 | WZ | 6780415  | 6852316  | SJC_S001792 | 29757  | 93380  | +  | Sjp_0085050.1 | biological regulation            | 0.76396  |
| unknown      | NA | NA       | NA       | SJC_S001792 | NA     | NA     | NA | Sjp_0085060.1 | transcription regulator activity | NA       |
| HSB10kb_1220 | 3  | 5999848  | 6027234  | SJC_S001793 | 51142  | 79512  | -  | Sjp_0085070.1 | reproductive process             | NA       |
| HSB10kb_1221 | 4  | 6161262  | 6262680  | SJC_S001794 | 1813   | 37311  | +  | Sjp_0085080.1 | biological regulation            | 0.76396  |
| HSB10kb_1221 | 4  | 6161262  | 6262680  | SJC_S001794 | 1813   | 37311  | +  | Sjp_0085090.1 | protein binding transcription    | NA       |

|              |    |          |          |             |      |        |    |               |                                                        |          |
|--------------|----|----------|----------|-------------|------|--------|----|---------------|--------------------------------------------------------|----------|
|              |    |          |          |             |      |        |    |               | factor activity                                        |          |
| unknown      | NA | NA       | NA       | SJC_S001794 | NA   | NA     | NA | Sjp_0085100.1 | binding                                                | 0.052762 |
| HSB10kb_1222 | 4  | 9497666  | 9520523  | SJC_S001795 | 3652 | 29672  | +  | Sjp_0085110.1 | NA                                                     | NA       |
| unknown      | NA | NA       | NA       | SJC_S001795 | NA   | NA     | NA | Sjp_0085120.1 | NA                                                     | NA       |
| unknown      | NA | NA       | NA       | SJC_S001795 | NA   | NA     | NA | Sjp_0085130.1 | NA                                                     | NA       |
| HSB10kb_1223 | 3  | 15113965 | 15139986 | SJC_S001796 | 58   | 41426  | +  | Sjp_0085140.1 | catalytic activity                                     | 0.035844 |
| HSB10kb_1223 | 3  | 15113965 | 15139986 | SJC_S001796 | 58   | 41426  | +  | Sjp_0085160.1 | cellular process                                       | 0.63852  |
| unknown      | NA | NA       | NA       | SJC_S001796 | NA   | NA     | NA | Sjp_0085170.1 | NA                                                     | NA       |
| unknown      | NA | NA       | NA       | SJC_S001797 | NA   | NA     | NA | Sjp_0085180.1 | NA                                                     | NA       |
| unknown      | NA | NA       | NA       | SJC_S001797 | NA   | NA     | NA | Sjp_0085190.1 | protein binding<br>transcription<br>factor activity    | NA       |
| unknown      | NA | NA       | NA       | SJC_S001798 | NA   | NA     | NA | Sjp_0085200.1 | cellular<br>component<br>organization or<br>biogenesis | NA       |
| unknown      | NA | NA       | NA       | SJC_S001798 | NA   | NA     | NA | Sjp_0085220.1 | transporter<br>activity                                | 0.782    |
| unknown      | NA | NA       | NA       | SJC_S001799 | NA   | NA     | NA | Sjp_0085230.1 | NA                                                     | NA       |
| unknown      | NA | NA       | NA       | SJC_S001799 | NA   | NA     | NA | Sjp_0085240.1 | NA                                                     | NA       |
| unknown      | NA | NA       | NA       | SJC_S001799 | NA   | NA     | NA | Sjp_0085250.1 | cell part                                              | 0.009037 |
| unknown      | NA | NA       | NA       | SJC_S001800 | NA   | NA     | NA | Sjp_0085260.1 | NA                                                     | NA       |
| unknown      | NA | NA       | NA       | SJC_S001801 | NA   | NA     | NA | Sjp_0085270.1 | NA                                                     | NA       |
| unknown      | NA | NA       | NA       | SJC_S001801 | NA   | NA     | NA | Sjp_0085280.1 | NA                                                     | NA       |
| unknown      | NA | NA       | NA       | SJC_S001801 | NA   | NA     | NA | Sjp_0085290.1 | NA                                                     | NA       |
| unknown      | NA | NA       | NA       | SJC_S001801 | NA   | NA     | NA | Sjp_0085300.1 | NA                                                     | NA       |
| HSB10kb_1224 | 6  | 12705164 | 12745679 | SJC_S001802 | 1254 | 42624  | +  | Sjp_0085310.1 | NA                                                     | NA       |
| HSB10kb_1224 | 6  | 12705164 | 12745679 | SJC_S001802 | 1254 | 42624  | +  | Sjp_0085320.1 | catalytic activity                                     | 0.035844 |
| HSB10kb_1224 | 6  | 12705164 | 12745679 | SJC_S001802 | 1254 | 42624  | +  | Sjp_0085330.1 | NA                                                     | NA       |
| unknown      | NA | NA       | NA       | SJC_S001802 | NA   | NA     | NA | Sjp_0085340.1 | NA                                                     | NA       |
| HSB10kb_1225 | 2  | 16831640 | 16966943 | SJC_S001803 | 6628 | 120707 | -  | Sjp_0085360.1 | NA                                                     | NA       |
| HSB10kb_1225 | 2  | 16831640 | 16966943 | SJC_S001803 | 6628 | 120707 | -  | Sjp_0085370.1 | NA                                                     | NA       |
| HSB10kb_1225 | 2  | 16831640 | 16966943 | SJC_S001803 | 6628 | 120707 | -  | Sjp_0085380.1 | NA                                                     | NA       |
| HSB10kb_1225 | 2  | 16831640 | 16966943 | SJC_S001803 | 6628 | 120707 | -  | Sjp_0085390.1 | NA                                                     | NA       |

|              |    |          |          |             |       |        |    |               |                      |          |
|--------------|----|----------|----------|-------------|-------|--------|----|---------------|----------------------|----------|
| HSB10kb_1225 | 2  | 16831640 | 16966943 | SJC_S001803 | 6628  | 120707 | -  | Sjp_0085400.1 | NA                   | NA       |
| HSB10kb_1225 | 2  | 16831640 | 16966943 | SJC_S001803 | 6628  | 120707 | -  | Sjp_0085410.1 | NA                   | NA       |
| HSB10kb_1225 | 2  | 16831640 | 16966943 | SJC_S001803 | 6628  | 120707 | -  | Sjp_0085420.1 | NA                   | NA       |
| HSB10kb_1225 | 2  | 16831640 | 16966943 | SJC_S001803 | 6628  | 120707 | -  | Sjp_0085430.1 | NA                   | NA       |
| unknown      | NA | NA       | NA       | SJC_S001803 | NA    | NA     | NA | Sjp_0085440.1 | NA                   | NA       |
| unknown      | NA | NA       | NA       | SJC_S001804 | NA    | NA     | NA | Sjp_0085450.1 | NA                   | NA       |
| unknown      | NA | NA       | NA       | SJC_S001805 | NA    | NA     | NA | Sjp_0085460.1 | NA                   | NA       |
| unknown      | NA | NA       | NA       | SJC_S001806 | NA    | NA     | NA | Sjp_0085470.1 | NA                   | NA       |
| unknown      | NA | NA       | NA       | SJC_S001806 | NA    | NA     | NA | Sjp_0085480.1 | NA                   | NA       |
| unknown      | NA | NA       | NA       | SJC_S001806 | NA    | NA     | NA | Sjp_0085490.1 | metabolic process    | 0.41934  |
| unknown      | NA | NA       | NA       | SJC_S001807 | NA    | NA     | NA | Sjp_0085500.1 | NA                   | NA       |
| unknown      | NA | NA       | NA       | SJC_S001807 | NA    | NA     | NA | Sjp_0085510.1 | NA                   | NA       |
| HSB10kb_1226 | 1  | 54551229 | 54571846 | SJC_S001808 | 1913  | 28765  | -  | Sjp_0085520.1 | NA                   | NA       |
| HSB10kb_1226 | 1  | 54551229 | 54571846 | SJC_S001808 | 1913  | 28765  | -  | Sjp_0085530.1 | catalytic activity   | 0.035844 |
| unknown      | NA | NA       | NA       | SJC_S001809 | NA    | NA     | NA | Sjp_0085540.1 | response to stimulus | NA       |
| unknown      | NA | NA       | NA       | SJC_S001810 | NA    | NA     | NA | Sjp_0085550.1 | catalytic activity   | 0.035844 |
| HSB10kb_1227 | WZ | 40827078 | 40854115 | SJC_S001812 | 3762  | 33996  | +  | Sjp_0085560.1 | NA                   | NA       |
| HSB10kb_1227 | WZ | 40827078 | 40854115 | SJC_S001812 | 3762  | 33996  | +  | Sjp_0085570.1 | cell proliferation   | NA       |
| HSB10kb_1227 | WZ | 40827078 | 40854115 | SJC_S001812 | 3762  | 33996  | +  | Sjp_0085580.1 | NA                   | NA       |
| unknown      | NA | NA       | NA       | SJC_S001812 | NA    | NA     | NA | Sjp_0085590.1 | NA                   | NA       |
| unknown      | NA | NA       | NA       | SJC_S001814 | NA    | NA     | NA | Sjp_0085600.1 | catalytic activity   | 0.035844 |
| unknown      | NA | NA       | NA       | SJC_S001815 | NA    | NA     | NA | Sjp_0085610.1 | NA                   | NA       |
| unknown      | NA | NA       | NA       | SJC_S001815 | NA    | NA     | NA | Sjp_0085620.1 | NA                   | NA       |
| unknown      | NA | NA       | NA       | SJC_S001815 | NA    | NA     | NA | Sjp_0085630.1 | NA                   | NA       |
| unknown      | NA | NA       | NA       | SJC_S001816 | NA    | NA     | NA | Sjp_0085640.1 | NA                   | NA       |
| HSB10kb_1228 | 5  | 2747682  | 2779389  | SJC_S001817 | 11922 | 36292  | +  | Sjp_0085650.1 | metabolic process    | 0.41934  |
| HSB10kb_1228 | 5  | 2747682  | 2779389  | SJC_S001817 | 11922 | 36292  | +  | Sjp_0085660.1 | NA                   | NA       |
| unknown      | NA | NA       | NA       | SJC_S001819 | NA    | NA     | NA | Sjp_0085670.1 | binding              | 0.052762 |
| HSB10kb_1229 | 4  | 8650752  | 8663040  | SJC_S001820 | 3022  | 17661  | -  | Sjp_0085680.1 | NA                   | NA       |
| unknown      | NA | NA       | NA       | SJC_S001820 | NA    | NA     | NA | Sjp_0085690.1 | NA                   | NA       |

|              |    |          |          |             |       |        |    |               |                                               |          |
|--------------|----|----------|----------|-------------|-------|--------|----|---------------|-----------------------------------------------|----------|
| unknown      | NA | NA       | NA       | SJC_S001821 | NA    | NA     | NA | Sjp_0085700.1 | NA                                            | NA       |
| unknown      | NA | NA       | NA       | SJC_S001822 | NA    | NA     | NA | Sjp_0085710.1 | binding                                       | 0.052762 |
| unknown      | NA | NA       | NA       | SJC_S001822 | NA    | NA     | NA | Sjp_0085720.1 | NA                                            | NA       |
| unknown      | NA | NA       | NA       | SJC_S001823 | NA    | NA     | NA | Sjp_0085730.1 | NA                                            | NA       |
| unknown      | NA | NA       | NA       | SJC_S001823 | NA    | NA     | NA | Sjp_0085740.1 | NA                                            | NA       |
| unknown      | NA | NA       | NA       | SJC_S001823 | NA    | NA     | NA | Sjp_0085750.1 | NA                                            | NA       |
| unknown      | NA | NA       | NA       | SJC_S001824 | NA    | NA     | NA | Sjp_0085760.1 | NA                                            | NA       |
| unknown      | NA | NA       | NA       | SJC_S001825 | NA    | NA     | NA | Sjp_0085770.1 | NA                                            | NA       |
| HSB10kb_1230 | 3  | 2910736  | 2940016  | SJC_S001826 | 14602 | 37044  | +  | Sjp_0085780.1 | NA                                            | NA       |
| unknown      | NA | NA       | NA       | SJC_S001827 | NA    | NA     | NA | Sjp_0085790.1 | catalytic activity                            | 0.035844 |
| unknown      | NA | NA       | NA       | SJC_S001828 | NA    | NA     | NA | Sjp_0085810.1 | NA                                            | NA       |
| HSB10kb_1231 | 1  | 5263409  | 5294410  | SJC_S001829 | 3494  | 32599  | +  | Sjp_0085820.1 | cell part                                     | 0.009037 |
| unknown      | NA | NA       | NA       | SJC_S001830 | NA    | NA     | NA | Sjp_0085830.1 | NA                                            | NA       |
| HSB10kb_1232 | 6  | 17412707 | 17543601 | SJC_S001831 | 2622  | 44314  | -  | Sjp_0085840.1 | binding                                       | 0.052762 |
| HSB10kb_1232 | 6  | 17412707 | 17543601 | SJC_S001831 | 2622  | 44314  | -  | Sjp_0085850.1 | NA                                            | NA       |
| unknown      | NA | NA       | NA       | SJC_S001832 | NA    | NA     | NA | Sjp_0085860.1 | NA                                            | NA       |
| unknown      | NA | NA       | NA       | SJC_S001833 | NA    | NA     | NA | Sjp_0085870.1 | cell part                                     | 0.009037 |
| unknown      | NA | NA       | NA       | SJC_S001833 | NA    | NA     | NA | Sjp_0085880.1 | NA                                            | NA       |
| unknown      | NA | NA       | NA       | SJC_S001834 | NA    | NA     | NA | Sjp_0085890.1 | NA                                            | NA       |
| unknown      | NA | NA       | NA       | SJC_S001835 | NA    | NA     | NA | Sjp_0085900.1 | NA                                            | NA       |
| HSB10kb_1233 | 1  | 34706982 | 34722154 | SJC_S001835 | 9448  | 27131  | -  | Sjp_0085920.1 | NA                                            | NA       |
| HSB10kb_1234 | 3  | 22969743 | 22996699 | SJC_S001836 | 1543  | 37893  | +  | Sjp_0085930.1 | NA                                            | NA       |
| HSB10kb_1234 | 3  | 22969743 | 22996699 | SJC_S001836 | 1543  | 37893  | +  | Sjp_0085940.1 | cellular process                              | 0.63852  |
| unknown      | NA | NA       | NA       | SJC_S001837 | NA    | NA     | NA | Sjp_0085950.1 | localization                                  | NA       |
| unknown      | NA | NA       | NA       | SJC_S001837 | NA    | NA     | NA | Sjp_0085960.1 | NA                                            | NA       |
| unknown      | NA | NA       | NA       | SJC_S001838 | NA    | NA     | NA | Sjp_0085970.1 | catalytic activity                            | 0.035844 |
| unknown      | NA | NA       | NA       | SJC_S001838 | NA    | NA     | NA | Sjp_0085980.1 | NA                                            | NA       |
| unknown      | NA | NA       | NA       | SJC_S001839 | NA    | NA     | NA | Sjp_0085990.1 | cellular component organization or biogenesis | NA       |
| unknown      | NA | NA       | NA       | SJC_S001839 | NA    | NA     | NA | Sjp_0086000.1 | NA                                            | NA       |
| HSB10kb_1235 | 4  | 2316551  | 2439107  | SJC_S001840 | 23251 | 113346 | -  | Sjp_0086010.1 | NA                                            | NA       |
| HSB10kb_1235 | 4  | 2316551  | 2439107  | SJC_S001840 | 23251 | 113346 | -  | Sjp_0086020.1 | biological                                    | 0.76396  |

|              |    |          |          |             |       |        |    |               |                       |          |
|--------------|----|----------|----------|-------------|-------|--------|----|---------------|-----------------------|----------|
|              |    |          |          |             |       |        |    |               | regulation            |          |
| HSB10kb_1235 | 4  | 2316551  | 2439107  | SJC_S001840 | 23251 | 113346 | -  | Sjp_0086030.1 | biological regulation | 0.76396  |
| unknown      | NA | NA       | NA       | SJC_S001842 | NA    | NA     | NA | Sjp_0086050.1 | catalytic activity    | 0.035844 |
| unknown      | NA | NA       | NA       | SJC_S001844 | NA    | NA     | NA | Sjp_0086060.1 | cell part             | 0.009037 |
| unknown      | NA | NA       | NA       | SJC_S001845 | NA    | NA     | NA | Sjp_0086070.1 | cell part             | 0.009037 |
| unknown      | NA | NA       | NA       | SJC_S001847 | NA    | NA     | NA | Sjp_0086080.1 | NA                    | NA       |
| unknown      | NA | NA       | NA       | SJC_S001847 | NA    | NA     | NA | Sjp_0086090.1 | NA                    | NA       |
| unknown      | NA | NA       | NA       | SJC_S001847 | NA    | NA     | NA | Sjp_0086100.1 | catalytic activity    | 0.035844 |
| unknown      | NA | NA       | NA       | SJC_S001848 | NA    | NA     | NA | Sjp_0086110.1 | biological regulation | 0.76396  |
| unknown      | NA | NA       | NA       | SJC_S001848 | NA    | NA     | NA | Sjp_0086120.1 | NA                    | NA       |
| unknown      | NA | NA       | NA       | SJC_S001848 | NA    | NA     | NA | Sjp_0086130.1 | catalytic activity    | 0.035844 |
| HSB10kb_1236 | 1  | 21702314 | 21728166 | SJC_S001850 | 5752  | 27484  | +  | Sjp_0086140.1 | NA                    | NA       |
| HSB10kb_1236 | 1  | 21702314 | 21728166 | SJC_S001850 | 5752  | 27484  | +  | Sjp_0086150.1 | binding               | 0.052762 |
| unknown      | NA | NA       | NA       | SJC_S001851 | NA    | NA     | NA | Sjp_0086160.1 | NA                    | NA       |
| unknown      | NA | NA       | NA       | SJC_S001852 | NA    | NA     | NA | Sjp_0086180.1 | NA                    | NA       |
| unknown      | NA | NA       | NA       | SJC_S001852 | NA    | NA     | NA | Sjp_0086190.1 | cell part             | 0.009037 |
| unknown      | NA | NA       | NA       | SJC_S001852 | NA    | NA     | NA | Sjp_0086200.1 | binding               | 0.052762 |
| unknown      | NA | NA       | NA       | SJC_S001852 | NA    | NA     | NA | Sjp_0086210.1 | binding               | 0.052762 |
| unknown      | NA | NA       | NA       | SJC_S001855 | NA    | NA     | NA | Sjp_0086220.1 | NA                    | NA       |
| unknown      | NA | NA       | NA       | SJC_S001857 | NA    | NA     | NA | Sjp_0086230.1 | NA                    | NA       |
| unknown      | NA | NA       | NA       | SJC_S001858 | NA    | NA     | NA | Sjp_0086240.1 | developmental process | NA       |
| unknown      | NA | NA       | NA       | SJC_S001859 | NA    | NA     | NA | Sjp_0086250.1 | NA                    | NA       |
| unknown      | NA | NA       | NA       | SJC_S001860 | NA    | NA     | NA | Sjp_0086260.1 | NA                    | NA       |
| unknown      | NA | NA       | NA       | SJC_S001862 | NA    | NA     | NA | Sjp_0086270.1 | NA                    | NA       |
| unknown      | NA | NA       | NA       | SJC_S001863 | NA    | NA     | NA | Sjp_0086280.1 | NA                    | NA       |
| unknown      | NA | NA       | NA       | SJC_S001864 | NA    | NA     | NA | Sjp_0086290.1 | NA                    | NA       |
| unknown      | NA | NA       | NA       | SJC_S001864 | NA    | NA     | NA | Sjp_0086300.1 | cell part             | 0.009037 |
| unknown      | NA | NA       | NA       | SJC_S001866 | NA    | NA     | NA | Sjp_0086310.1 | NA                    | NA       |
| unknown      | NA | NA       | NA       | SJC_S001867 | NA    | NA     | NA | Sjp_0086320.1 | catalytic activity    | 0.035844 |
| unknown      | NA | NA       | NA       | SJC_S001868 | NA    | NA     | NA | Sjp_0086330.1 | NA                    | NA       |
| unknown      | NA | NA       | NA       | SJC_S001868 | NA    | NA     | NA | Sjp_0086340.1 | binding               | 0.052762 |

|              |    |          |          |             |      |       |    |               |                       |          |
|--------------|----|----------|----------|-------------|------|-------|----|---------------|-----------------------|----------|
| unknown      | NA | NA       | NA       | SJC_S001869 | NA   | NA    | NA | Sjp_0086350.1 | binding               | 0.052762 |
| unknown      | NA | NA       | NA       | SJC_S001871 | NA   | NA    | NA | Sjp_0086360.1 | NA                    | NA       |
| unknown      | NA | NA       | NA       | SJC_S001871 | NA   | NA    | NA | Sjp_0086370.1 | NA                    | NA       |
| unknown      | NA | NA       | NA       | SJC_S001873 | NA   | NA    | NA | Sjp_0086390.1 | NA                    | NA       |
| unknown      | NA | NA       | NA       | SJC_S001874 | NA   | NA    | NA | Sjp_0086400.1 | NA                    | NA       |
| HSB10kb_1237 | WZ | 10371939 | 10396017 | SJC_S001875 | 899  | 26803 | +  | Sjp_0086410.1 | binding               | 0.052762 |
| unknown      | NA | NA       | NA       | SJC_S001875 | NA   | NA    | NA | Sjp_0086420.1 | NA                    | NA       |
| unknown      | NA | NA       | NA       | SJC_S001876 | NA   | NA    | NA | Sjp_0086430.1 | NA                    | NA       |
| unknown      | NA | NA       | NA       | SJC_S001876 | NA   | NA    | NA | Sjp_0086440.1 | biological regulation | 0.76396  |
| unknown      | NA | NA       | NA       | SJC_S001876 | NA   | NA    | NA | Sjp_0086450.1 | cell part             | 0.009037 |
| unknown      | NA | NA       | NA       | SJC_S001877 | NA   | NA    | NA | Sjp_0086460.1 | NA                    | NA       |
| unknown      | NA | NA       | NA       | SJC_S001877 | NA   | NA    | NA | Sjp_0086470.1 | NA                    | NA       |
| HSB10kb_1238 | WZ | 28049408 | 28070223 | SJC_S001878 | 2633 | 14348 | -  | Sjp_0086480.1 | NA                    | NA       |
| unknown      | NA | NA       | NA       | SJC_S001878 | NA   | NA    | NA | Sjp_0086490.1 | catalytic activity    | 0.035844 |
| unknown      | NA | NA       | NA       | SJC_S001878 | NA   | NA    | NA | Sjp_0086500.1 | binding               | 0.052762 |
| unknown      | NA | NA       | NA       | SJC_S001880 | NA   | NA    | NA | Sjp_0086510.1 | NA                    | NA       |
| unknown      | NA | NA       | NA       | SJC_S001880 | NA   | NA    | NA | Sjp_0086520.1 | binding               | 0.052762 |
| HSB10kb_1239 | 4  | 9976989  | 10003003 | SJC_S001881 | 9688 | 32951 | -  | Sjp_0086530.1 | cell part             | 0.009037 |
| HSB10kb_1239 | 4  | 9976989  | 10003003 | SJC_S001881 | 9688 | 32951 | -  | Sjp_0086540.1 | biological regulation | 0.76396  |
| HSB10kb_1240 | 4  | 28002946 | 28016931 | SJC_S001883 | 5216 | 24891 | +  | Sjp_0086550.1 | NA                    | NA       |
| unknown      | NA | NA       | NA       | SJC_S001884 | NA   | NA    | NA | Sjp_0086560.1 | cell part             | 0.009037 |
| unknown      | NA | NA       | NA       | SJC_S001886 | NA   | NA    | NA | Sjp_0086570.1 | biological regulation | 0.76396  |
| unknown      | NA | NA       | NA       | SJC_S001886 | NA   | NA    | NA | Sjp_0086580.1 | NA                    | NA       |
| unknown      | NA | NA       | NA       | SJC_S001887 | NA   | NA    | NA | Sjp_0086590.1 | NA                    | NA       |
| unknown      | NA | NA       | NA       | SJC_S001889 | NA   | NA    | NA | Sjp_0086600.1 | cell part             | 0.009037 |
| unknown      | NA | NA       | NA       | SJC_S001891 | NA   | NA    | NA | Sjp_0086610.1 | biological regulation | 0.76396  |
| unknown      | NA | NA       | NA       | SJC_S001891 | NA   | NA    | NA | Sjp_0086620.1 | NA                    | NA       |
| unknown      | NA | NA       | NA       | SJC_S001891 | NA   | NA    | NA | Sjp_0086630.1 | NA                    | NA       |
| unknown      | NA | NA       | NA       | SJC_S001894 | NA   | NA    | NA | Sjp_0086640.1 | enzyme regulator      | 0.1755   |

|              |    |          |          |             |       |       |    |               |                                               |          |
|--------------|----|----------|----------|-------------|-------|-------|----|---------------|-----------------------------------------------|----------|
|              |    |          |          |             |       |       |    |               | activity                                      |          |
| HSB10kb_1241 | WZ | 20309000 | 20322360 | SJC_S001894 | 29333 | 41349 | +  | Sjp_0086650.1 | NA                                            | NA       |
| unknown      | NA | NA       | NA       | SJC_S001895 | NA    | NA    | NA | Sjp_0086660.1 | NA                                            | NA       |
| unknown      | NA | NA       | NA       | SJC_S001896 | NA    | NA    | NA | Sjp_0086670.1 | NA                                            | NA       |
| unknown      | NA | NA       | NA       | SJC_S001897 | NA    | NA    | NA | Sjp_0086680.1 | metabolic process                             | 0.41934  |
| unknown      | NA | NA       | NA       | SJC_S001897 | NA    | NA    | NA | Sjp_0086690.1 | NA                                            | NA       |
| unknown      | NA | NA       | NA       | SJC_S001898 | NA    | NA    | NA | Sjp_0086700.1 | NA                                            | NA       |
| unknown      | NA | NA       | NA       | SJC_S001899 | NA    | NA    | NA | Sjp_0086710.1 | transporter activity                          | 0.782    |
| unknown      | NA | NA       | NA       | SJC_S001901 | NA    | NA    | NA | Sjp_0086720.1 | NA                                            | NA       |
| unknown      | NA | NA       | NA       | SJC_S001902 | NA    | NA    | NA | Sjp_0086730.1 | NA                                            | NA       |
| unknown      | NA | NA       | NA       | SJC_S001902 | NA    | NA    | NA | Sjp_0086740.1 | NA                                            | NA       |
| unknown      | NA | NA       | NA       | SJC_S001903 | NA    | NA    | NA | Sjp_0086750.1 | NA                                            | NA       |
| unknown      | NA | NA       | NA       | SJC_S001905 | NA    | NA    | NA | Sjp_0086760.1 | developmental process                         | NA       |
| unknown      | NA | NA       | NA       | SJC_S001905 | NA    | NA    | NA | Sjp_0086770.1 | binding                                       | 0.052762 |
| unknown      | NA | NA       | NA       | SJC_S001905 | NA    | NA    | NA | Sjp_0086780.1 | cellular process                              | 0.63852  |
| unknown      | NA | NA       | NA       | SJC_S001906 | NA    | NA    | NA | Sjp_0086790.1 | NA                                            | NA       |
| HSB10kb_1242 | WZ | 26154014 | 26173439 | SJC_S001906 | 13137 | 35305 | -  | Sjp_0086800.1 | cellular component organization or biogenesis | NA       |
| HSB10kb_1242 | WZ | 26154014 | 26173439 | SJC_S001906 | 13137 | 35305 | -  | Sjp_0086810.1 | NA                                            | NA       |
| unknown      | NA | NA       | NA       | SJC_S001907 | NA    | NA    | NA | Sjp_0086820.1 | NA                                            | NA       |
| unknown      | NA | NA       | NA       | SJC_S001907 | NA    | NA    | NA | Sjp_0086830.1 | NA                                            | NA       |
| unknown      | NA | NA       | NA       | SJC_S001907 | NA    | NA    | NA | Sjp_0086840.1 | NA                                            | NA       |
| unknown      | NA | NA       | NA       | SJC_S001908 | NA    | NA    | NA | Sjp_0086850.1 | NA                                            | NA       |
| unknown      | NA | NA       | NA       | SJC_S001909 | NA    | NA    | NA | Sjp_0086860.1 | NA                                            | NA       |
| unknown      | NA | NA       | NA       | SJC_S001910 | NA    | NA    | NA | Sjp_0086870.1 | NA                                            | NA       |
| unknown      | NA | NA       | NA       | SJC_S001911 | NA    | NA    | NA | Sjp_0086880.1 | NA                                            | NA       |
| unknown      | NA | NA       | NA       | SJC_S001911 | NA    | NA    | NA | Sjp_0086890.1 | NA                                            | NA       |
| unknown      | NA | NA       | NA       | SJC_S001912 | NA    | NA    | NA | Sjp_0086900.1 | NA                                            | NA       |
| HSB10kb_1243 | 2  | 12740539 | 12753251 | SJC_S001914 | 4816  | 17914 | -  | Sjp_0086910.1 | NA                                            | NA       |



|              |    |          |          |             |      |       |    |               |                                  |          |
|--------------|----|----------|----------|-------------|------|-------|----|---------------|----------------------------------|----------|
| unknown      | NA | NA       | NA       | SJC_S001917 | NA   | NA    | NA | Sjp_0086930.1 | NA                               | NA       |
| unknown      | NA | NA       | NA       | SJC_S001919 | NA   | NA    | NA | Sjp_0086940.1 | NA                               | NA       |
| unknown      | NA | NA       | NA       | SJC_S001922 | NA   | NA    | NA | Sjp_0086950.1 | biological regulation            | 0.76396  |
| unknown      | NA | NA       | NA       | SJC_S001923 | NA   | NA    | NA | Sjp_0086960.1 | catalytic activity               | 0.035844 |
| unknown      | NA | NA       | NA       | SJC_S001923 | NA   | NA    | NA | Sjp_0086970.1 | cell part                        | 0.009037 |
| unknown      | NA | NA       | NA       | SJC_S001924 | NA   | NA    | NA | Sjp_0086980.1 | transcription regulator activity | NA       |
| unknown      | NA | NA       | NA       | SJC_S001924 | NA   | NA    | NA | Sjp_0086990.1 | transcription regulator activity | NA       |
| HSB10kb_1244 | 4  | 11180140 | 11220771 | SJC_S001926 | 897  | 43299 | +  | Sjp_0087000.1 | reproductive process             | NA       |
| HSB10kb_1244 | 4  | 11180140 | 11220771 | SJC_S001926 | 897  | 43299 | +  | Sjp_0087010.1 | NA                               | NA       |
| HSB10kb_1244 | 4  | 11180140 | 11220771 | SJC_S001926 | 897  | 43299 | +  | Sjp_0087020.1 | biological regulation            | 0.76396  |
| HSB10kb_1245 | 1  | 24954880 | 24979908 | SJC_S001927 | 486  | 36918 | +  | Sjp_0087030.1 | enzyme regulator activity        | 0.1755   |
| unknown      | NA | NA       | NA       | SJC_S001927 | NA   | NA    | NA | Sjp_0087040.1 | NA                               | NA       |
| unknown      | NA | NA       | NA       | SJC_S001928 | NA   | NA    | NA | Sjp_0087050.1 | NA                               | NA       |
| unknown      | NA | NA       | NA       | SJC_S001929 | NA   | NA    | NA | Sjp_0087060.1 | NA                               | NA       |
| unknown      | NA | NA       | NA       | SJC_S001929 | NA   | NA    | NA | Sjp_0087070.1 | NA                               | NA       |
| unknown      | NA | NA       | NA       | SJC_S001930 | NA   | NA    | NA | Sjp_0087080.1 | NA                               | NA       |
| unknown      | NA | NA       | NA       | SJC_S001931 | NA   | NA    | NA | Sjp_0087090.1 | establishment of localization    | NA       |
| unknown      | NA | NA       | NA       | SJC_S001933 | NA   | NA    | NA | Sjp_0087100.1 | NA                               | NA       |
| unknown      | NA | NA       | NA       | SJC_S001934 | NA   | NA    | NA | Sjp_0087110.1 | NA                               | NA       |
| unknown      | NA | NA       | NA       | SJC_S001934 | NA   | NA    | NA | Sjp_0087120.1 | molecular transducer activity    | 0.50162  |
| HSB10kb_1246 | 4  | 8320505  | 8338019  | SJC_S001935 | 4803 | 19301 |    | Sjp_0087130.1 | NA                               | NA       |
| unknown      | NA | NA       | NA       | SJC_S001936 | NA   | NA    | NA | Sjp_0087140.1 | molecular transducer             | 0.50162  |

|              |    |          |          |             |       |       |    |               |                               |          |
|--------------|----|----------|----------|-------------|-------|-------|----|---------------|-------------------------------|----------|
|              |    |          |          |             |       |       |    |               | activity                      |          |
| unknown      | NA | NA       | NA       | SJC_S001936 | NA    | NA    | NA | Sjp_0087150.1 | molecular transducer activity | 0.50162  |
| unknown      | NA | NA       | NA       | SJC_S001936 | NA    | NA    | NA | Sjp_0087160.1 | NA                            | NA       |
| unknown      | NA | NA       | NA       | SJC_S001937 | NA    | NA    | NA | Sjp_0087170.1 | establishment of localization | NA       |
| unknown      | NA | NA       | NA       | SJC_S001937 | NA    | NA    | NA | Sjp_0087180.1 | NA                            | NA       |
| unknown      | NA | NA       | NA       | SJC_S001938 | NA    | NA    | NA | Sjp_0087200.1 | catalytic activity            | 0.035844 |
| unknown      | NA | NA       | NA       | SJC_S001940 | NA    | NA    | NA | Sjp_0087210.1 | catalytic activity            | 0.035844 |
| unknown      | NA | NA       | NA       | SJC_S001941 | NA    | NA    | NA | Sjp_0087220.1 | NA                            | NA       |
| unknown      | NA | NA       | NA       | SJC_S001942 | NA    | NA    | NA | Sjp_0087230.1 | NA                            | NA       |
| unknown      | NA | NA       | NA       | SJC_S001942 | NA    | NA    | NA | Sjp_0087240.1 | binding                       | 0.052762 |
| unknown      | NA | NA       | NA       | SJC_S001945 | NA    | NA    | NA | Sjp_0087250.1 | binding                       | 0.052762 |
| HSB10kb_1247 | 1  | 45485034 | 45507200 | SJC_S001947 | 9932  | 30086 | -  | Sjp_0087260.1 | NA                            | NA       |
| HSB10kb_1248 | 3  | 8084185  | 8109500  | SJC_S001948 | 15931 | 37765 | -  | Sjp_0087270.1 | NA                            | NA       |
| HSB10kb_1249 | 3  | 11051081 | 11080395 | SJC_S001949 | 8319  | 29584 | -  | Sjp_0087280.1 | binding                       | 0.052762 |
| HSB10kb_1249 | 3  | 11051081 | 11080395 | SJC_S001949 | 8319  | 29584 | -  | Sjp_0087290.1 | metabolic process             | 0.41934  |
| unknown      | NA | NA       | NA       | SJC_S001949 | NA    | NA    | NA | Sjp_0087300.1 | NA                            | NA       |
| unknown      | NA | NA       | NA       | SJC_S001950 | NA    | NA    | NA | Sjp_0087310.1 | NA                            | NA       |
| unknown      | NA | NA       | NA       | SJC_S001951 | NA    | NA    | NA | Sjp_0087320.1 | NA                            | NA       |
| unknown      | NA | NA       | NA       | SJC_S001953 | NA    | NA    | NA | Sjp_0087330.1 | NA                            | NA       |
| unknown      | NA | NA       | NA       | SJC_S001953 | NA    | NA    | NA | Sjp_0087340.1 | NA                            | NA       |
| unknown      | NA | NA       | NA       | SJC_S001959 | NA    | NA    | NA | Sjp_0087360.1 | NA                            | NA       |
| unknown      | NA | NA       | NA       | SJC_S001959 | NA    | NA    | NA | Sjp_0087370.1 | NA                            | NA       |
| unknown      | NA | NA       | NA       | SJC_S001961 | NA    | NA    | NA | Sjp_0087380.1 | enzyme regulator activity     | 0.1755   |
| unknown      | NA | NA       | NA       | SJC_S001964 | NA    | NA    | NA | Sjp_0087400.1 | NA                            | NA       |
| unknown      | NA | NA       | NA       | SJC_S001967 | NA    | NA    | NA | Sjp_0087410.1 | catalytic activity            | 0.035844 |
| unknown      | NA | NA       | NA       | SJC_S001969 | NA    | NA    | NA | Sjp_0087420.1 | NA                            | NA       |
| unknown      | NA | NA       | NA       | SJC_S001970 | NA    | NA    | NA | Sjp_0087430.1 | NA                            | NA       |
| unknown      | NA | NA       | NA       | SJC_S001972 | NA    | NA    | NA | Sjp_0087440.1 | metabolic                     | 0.41934  |

|              |    |          |          |             |      |       |    |               |                                               |          |
|--------------|----|----------|----------|-------------|------|-------|----|---------------|-----------------------------------------------|----------|
|              |    |          |          |             |      |       |    |               | process                                       |          |
| unknown      | NA | NA       | NA       | SJC_S001973 | NA   | NA    | NA | Sjp_0087450.1 | NA                                            | NA       |
| unknown      | NA | NA       | NA       | SJC_S001974 | NA   | NA    | NA | Sjp_0087460.1 | NA                                            | NA       |
| unknown      | NA | NA       | NA       | SJC_S001975 | NA   | NA    | NA | Sjp_0087470.1 | biological regulation                         | 0.76396  |
| unknown      | NA | NA       | NA       | SJC_S001976 | NA   | NA    | NA | Sjp_0087480.1 | catalytic activity                            | 0.035844 |
| unknown      | NA | NA       | NA       | SJC_S001977 | NA   | NA    | NA | Sjp_0087490.1 | cell part                                     | 0.009037 |
| unknown      | NA | NA       | NA       | SJC_S001979 | NA   | NA    | NA | Sjp_0087500.1 | biological regulation                         | 0.76396  |
| unknown      | NA | NA       | NA       | SJC_S001980 | NA   | NA    | NA | Sjp_0087510.1 | NA                                            | NA       |
| unknown      | NA | NA       | NA       | SJC_S001981 | NA   | NA    | NA | Sjp_0087520.1 | NA                                            | NA       |
| unknown      | NA | NA       | NA       | SJC_S001983 | NA   | NA    | NA | Sjp_0087530.1 | NA                                            | NA       |
| unknown      | NA | NA       | NA       | SJC_S001983 | NA   | NA    | NA | Sjp_0087540.1 | binding                                       | 0.052762 |
| unknown      | NA | NA       | NA       | SJC_S001983 | NA   | NA    | NA | Sjp_0087550.1 | NA                                            | NA       |
| unknown      | NA | NA       | NA       | SJC_S001983 | NA   | NA    | NA | Sjp_0087560.1 | NA                                            | NA       |
| unknown      | NA | NA       | NA       | SJC_S001984 | NA   | NA    | NA | Sjp_0087570.1 | NA                                            | NA       |
| unknown      | NA | NA       | NA       | SJC_S001985 | NA   | NA    | NA | Sjp_0087580.1 | NA                                            | NA       |
| unknown      | NA | NA       | NA       | SJC_S001986 | NA   | NA    | NA | Sjp_0087590.1 | NA                                            | NA       |
| unknown      | NA | NA       | NA       | SJC_S001987 | NA   | NA    | NA | Sjp_0087600.1 | NA                                            | NA       |
| unknown      | NA | NA       | NA       | SJC_S001987 | NA   | NA    | NA | Sjp_0087610.1 | NA                                            | NA       |
| unknown      | NA | NA       | NA       | SJC_S001987 | NA   | NA    | NA | Sjp_0087620.1 | NA                                            | NA       |
| unknown      | NA | NA       | NA       | SJC_S001988 | NA   | NA    | NA | Sjp_0087630.1 | cellular component organization or biogenesis | NA       |
| unknown      | NA | NA       | NA       | SJC_S001990 | NA   | NA    | NA | Sjp_0087640.1 | NA                                            | NA       |
| unknown      | NA | NA       | NA       | SJC_S001993 | NA   | NA    | NA | Sjp_0087650.1 | NA                                            | NA       |
| unknown      | NA | NA       | NA       | SJC_S001994 | NA   | NA    | NA | Sjp_0087660.1 | NA                                            | NA       |
| unknown      | NA | NA       | NA       | SJC_S001994 | NA   | NA    | NA | Sjp_0087670.1 | NA                                            | NA       |
| unknown      | NA | NA       | NA       | SJC_S001995 | NA   | NA    | NA | Sjp_0087680.1 | NA                                            | NA       |
| unknown      | NA | NA       | NA       | SJC_S001996 | NA   | NA    | NA | Sjp_0087690.1 | NA                                            | NA       |
| unknown      | NA | NA       | NA       | SJC_S001996 | NA   | NA    | NA | Sjp_0087700.1 | NA                                            | NA       |
| HSB10kb_1250 | 3  | 12241213 | 12270243 | SJC_S001999 | 1912 | 30939 | -  | Sjp_0087710.1 | cell part                                     | 0.009037 |
| unknown      | NA | NA       | NA       | SJC_S002000 | NA   | NA    | NA | Sjp_0087720.1 | NA                                            | NA       |

|              |    |          |          |             |      |       |    |               |                           |          |
|--------------|----|----------|----------|-------------|------|-------|----|---------------|---------------------------|----------|
| unknown      | NA | NA       | NA       | SJC_S002003 | NA   | NA    | NA | Sjp_0087730.1 | NA                        | NA       |
| HSB10kb_1251 | 1  | 23869988 | 23896497 | SJC_S002004 | 7984 | 32096 | +  | Sjp_0087740.1 | cell part                 | 0.009037 |
| HSB10kb_1251 | 1  | 23869988 | 23896497 | SJC_S002004 | 7984 | 32096 | +  | Sjp_0087750.1 | catalytic activity        | 0.035844 |
| unknown      | NA | NA       | NA       | SJC_S002006 | NA   | NA    | NA | Sjp_0087760.1 | NA                        | NA       |
| HSB10kb_1252 | WZ | 31953332 | 31978859 | SJC_S002008 | 470  | 23947 | +  | Sjp_0087770.1 | NA                        | NA       |
| unknown      | NA | NA       | NA       | SJC_S002009 | NA   | NA    | NA | Sjp_0087780.1 | NA                        | NA       |
| unknown      | NA | NA       | NA       | SJC_S002010 | NA   | NA    | NA | Sjp_0087790.1 | catalytic activity        | 0.035844 |
| unknown      | NA | NA       | NA       | SJC_S002010 | NA   | NA    | NA | Sjp_0087800.1 | biological regulation     | 0.76396  |
| unknown      | NA | NA       | NA       | SJC_S002012 | NA   | NA    | NA | Sjp_0087810.1 | binding                   | 0.052762 |
| unknown      | NA | NA       | NA       | SJC_S002012 | NA   | NA    | NA | Sjp_0087820.1 | NA                        | NA       |
| unknown      | NA | NA       | NA       | SJC_S002014 | NA   | NA    | NA | Sjp_0087830.1 | biological regulation     | 0.76396  |
| unknown      | NA | NA       | NA       | SJC_S002014 | NA   | NA    | NA | Sjp_0087840.1 | NA                        | NA       |
| unknown      | NA | NA       | NA       | SJC_S002016 | NA   | NA    | NA | Sjp_0087850.1 | enzyme regulator activity | 0.1755   |
| unknown      | NA | NA       | NA       | SJC_S002016 | NA   | NA    | NA | Sjp_0087860.1 | NA                        | NA       |
| unknown      | NA | NA       | NA       | SJC_S002017 | NA   | NA    | NA | Sjp_0087870.1 | biological regulation     | 0.76396  |
| unknown      | NA | NA       | NA       | SJC_S002018 | NA   | NA    | NA | Sjp_0087880.1 | binding                   | 0.052762 |
| unknown      | NA | NA       | NA       | SJC_S002019 | NA   | NA    | NA | Sjp_0087890.1 | NA                        | NA       |
| unknown      | NA | NA       | NA       | SJC_S002019 | NA   | NA    | NA | Sjp_0087900.1 | NA                        | NA       |
| HSB10kb_1253 | 3  | 5222244  | 5241250  | SJC_S002022 | 6154 | 19688 | +  | Sjp_0087910.1 | cell part                 | 0.009037 |
| unknown      | NA | NA       | NA       | SJC_S002024 | NA   | NA    | NA | Sjp_0087920.1 | transporter activity      | 0.782    |
| unknown      | NA | NA       | NA       | SJC_S002026 | NA   | NA    | NA | Sjp_0087930.1 | NA                        | NA       |
| unknown      | NA | NA       | NA       | SJC_S002029 | NA   | NA    | NA | Sjp_0087940.1 | NA                        | NA       |
| unknown      | NA | NA       | NA       | SJC_S002031 | NA   | NA    | NA | Sjp_0087950.1 | catalytic activity        | 0.035844 |
| unknown      | NA | NA       | NA       | SJC_S002033 | NA   | NA    | NA | Sjp_0087960.1 | catalytic activity        | 0.035844 |
| unknown      | NA | NA       | NA       | SJC_S002034 | NA   | NA    | NA | Sjp_0087970.1 | NA                        | NA       |
| unknown      | NA | NA       | NA       | SJC_S002035 | NA   | NA    | NA | Sjp_0087980.1 | metabolic process         | 0.41934  |
| unknown      | NA | NA       | NA       | SJC_S002035 | NA   | NA    | NA | Sjp_0087990.1 | NA                        | NA       |

|              |    |          |          |             |      |       |    |               |                                                    |          |
|--------------|----|----------|----------|-------------|------|-------|----|---------------|----------------------------------------------------|----------|
| unknown      | NA | NA       | NA       | SJC_S002035 | NA   | NA    | NA | Sjp_0088000.1 | NA                                                 | NA       |
| unknown      | NA | NA       | NA       | SJC_S002036 | NA   | NA    | NA | Sjp_0088010.1 | NA                                                 | NA       |
| unknown      | NA | NA       | NA       | SJC_S002037 | NA   | NA    | NA | Sjp_0088020.1 | nucleic acid binding transcription factor activity | NA       |
| unknown      | NA | NA       | NA       | SJC_S002038 | NA   | NA    | NA | Sjp_0088030.1 | NA                                                 | NA       |
| unknown      | NA | NA       | NA       | SJC_S002041 | NA   | NA    | NA | Sjp_0088040.1 | NA                                                 | NA       |
| unknown      | NA | NA       | NA       | SJC_S002042 | NA   | NA    | NA | Sjp_0088050.1 | NA                                                 | NA       |
| unknown      | NA | NA       | NA       | SJC_S002044 | NA   | NA    | NA | Sjp_0088060.1 | NA                                                 | NA       |
| unknown      | NA | NA       | NA       | SJC_S002046 | NA   | NA    | NA | Sjp_0088070.1 | NA                                                 | NA       |
| unknown      | NA | NA       | NA       | SJC_S002047 | NA   | NA    | NA | Sjp_0088080.1 | NA                                                 | NA       |
| unknown      | NA | NA       | NA       | SJC_S002049 | NA   | NA    | NA | Sjp_0088090.1 | NA                                                 | NA       |
| unknown      | NA | NA       | NA       | SJC_S002051 | NA   | NA    | NA | Sjp_0088100.1 | NA                                                 | NA       |
| unknown      | NA | NA       | NA       | SJC_S002052 | NA   | NA    | NA | Sjp_0088110.1 | NA                                                 | NA       |
| unknown      | NA | NA       | NA       | SJC_S002053 | NA   | NA    | NA | Sjp_0088120.1 | NA                                                 | NA       |
| unknown      | NA | NA       | NA       | SJC_S002053 | NA   | NA    | NA | Sjp_0088130.1 | biological regulation                              | 0.76396  |
| HSB10kb_1254 | 1  | 21065281 | 21099141 | SJC_S002054 | 6655 | 34356 | +  | NA            | NA                                                 | NA       |
| unknown      | NA | NA       | NA       | SJC_S002056 | NA   | NA    | NA | Sjp_0088150.1 | cell part                                          | 0.009037 |
| unknown      | NA | NA       | NA       | SJC_S002058 | NA   | NA    | NA | Sjp_0088160.1 | cellular process                                   | 0.63852  |
| unknown      | NA | NA       | NA       | SJC_S002059 | NA   | NA    | NA | Sjp_0088170.1 | NA                                                 | NA       |
| unknown      | NA | NA       | NA       | SJC_S002060 | NA   | NA    | NA | Sjp_0088180.1 | NA                                                 | NA       |
| unknown      | NA | NA       | NA       | SJC_S002061 | NA   | NA    | NA | Sjp_0088190.1 | NA                                                 | NA       |
| unknown      | NA | NA       | NA       | SJC_S002062 | NA   | NA    | NA | Sjp_0088200.1 | catalytic activity                                 | 0.035844 |
| unknown      | NA | NA       | NA       | SJC_S002063 | NA   | NA    | NA | Sjp_0088210.1 | NA                                                 | NA       |
| unknown      | NA | NA       | NA       | SJC_S002065 | NA   | NA    | NA | Sjp_0088220.1 | NA                                                 | NA       |
| unknown      | NA | NA       | NA       | SJC_S002070 | NA   | NA    | NA | Sjp_0088250.1 | NA                                                 | NA       |
| unknown      | NA | NA       | NA       | SJC_S002072 | NA   | NA    | NA | Sjp_0088260.1 | NA                                                 | NA       |
| HSB10kb_1255 | WZ | 34919048 | 34933140 | SJC_S002073 | 5213 | 20199 | -  | Sjp_0088270.1 | NA                                                 | NA       |
| unknown      | NA | NA       | NA       | SJC_S002074 | NA   | NA    | NA | Sjp_0088280.1 | NA                                                 | NA       |
| unknown      | NA | NA       | NA       | SJC_S002076 | NA   | NA    | NA | Sjp_0088290.1 | enzyme regulator activity                          | 0.1755   |

|              |    |         |         |             |      |       |    |               |                                               |          |
|--------------|----|---------|---------|-------------|------|-------|----|---------------|-----------------------------------------------|----------|
| unknown      | NA | NA      | NA      | SJC_S002077 | NA   | NA    | NA | Sjp_0088300.1 | NA                                            | NA       |
| HSB10kb_1256 | 1  | 9767334 | 9797632 | SJC_S002078 | 1    | 31160 | +  | NA            | NA                                            | NA       |
| unknown      | NA | NA      | NA      | SJC_S002078 | NA   | NA    | NA | Sjp_0088310.1 | enzyme regulator activity                     | 0.1755   |
| unknown      | NA | NA      | NA      | SJC_S002080 | NA   | NA    | NA | Sjp_0088320.1 | cellular component organization or biogenesis | NA       |
| unknown      | NA | NA      | NA      | SJC_S002080 | NA   | NA    | NA | Sjp_0088330.1 | NA                                            | NA       |
| unknown      | NA | NA      | NA      | SJC_S002081 | NA   | NA    | NA | Sjp_0088340.1 | catalytic activity                            | 0.035844 |
| unknown      | NA | NA      | NA      | SJC_S002082 | NA   | NA    | NA | Sjp_0088350.1 | metabolic process                             | 0.41934  |
| unknown      | NA | NA      | NA      | SJC_S002084 | NA   | NA    | NA | Sjp_0088360.1 | NA                                            | NA       |
| unknown      | NA | NA      | NA      | SJC_S002085 | NA   | NA    | NA | Sjp_0088370.1 | NA                                            | NA       |
| unknown      | NA | NA      | NA      | SJC_S002086 | NA   | NA    | NA | Sjp_0088380.1 | cell part                                     | 0.009037 |
| unknown      | NA | NA      | NA      | SJC_S002087 | NA   | NA    | NA | Sjp_0088390.1 | catalytic activity                            | 0.035844 |
| unknown      | NA | NA      | NA      | SJC_S002087 | NA   | NA    | NA | Sjp_0088400.1 | cellular component organization or biogenesis | NA       |
| unknown      | NA | NA      | NA      | SJC_S002090 | NA   | NA    | NA | Sjp_0088410.1 | binding                                       | 0.052762 |
| unknown      | NA | NA      | NA      | SJC_S002092 | NA   | NA    | NA | Sjp_0088430.1 | NA                                            | NA       |
| unknown      | NA | NA      | NA      | SJC_S002096 | NA   | NA    | NA | Sjp_0088440.1 | NA                                            | NA       |
| unknown      | NA | NA      | NA      | SJC_S002096 | NA   | NA    | NA | Sjp_0088450.1 | NA                                            | NA       |
| unknown      | NA | NA      | NA      | SJC_S002099 | NA   | NA    | NA | Sjp_0088460.1 | NA                                            | NA       |
| unknown      | NA | NA      | NA      | SJC_S002101 | NA   | NA    | NA | Sjp_0088470.1 | catalytic activity                            | 0.035844 |
| unknown      | NA | NA      | NA      | SJC_S002105 | NA   | NA    | NA | Sjp_0088490.1 | NA                                            | NA       |
| unknown      | NA | NA      | NA      | SJC_S002105 | NA   | NA    | NA | Sjp_0088500.1 | NA                                            | NA       |
| unknown      | NA | NA      | NA      | SJC_S002110 | NA   | NA    | NA | Sjp_0088510.1 | catalytic activity                            | 0.035844 |
| unknown      | NA | NA      | NA      | SJC_S002111 | NA   | NA    | NA | Sjp_0088520.1 | molecular transducer activity                 | 0.50162  |
| HSB10kb_1257 | WZ | 850124  | 863943  | SJC_S002117 | 4207 | 15442 | -  | Sjp_0088530.1 | NA                                            | NA       |
| unknown      | NA | NA      | NA      | SJC_S002119 | NA   | NA    | NA | Sjp_0088540.1 | catalytic activity                            | 0.035844 |

|         |    |    |    |             |    |    |    |               |                                               |          |
|---------|----|----|----|-------------|----|----|----|---------------|-----------------------------------------------|----------|
| unknown | NA | NA | NA | SJC_S002119 | NA | NA | NA | Sjp_0088550.1 | NA                                            | NA       |
| unknown | NA | NA | NA | SJC_S002121 | NA | NA | NA | Sjp_0088560.1 | cellular component organization or biogenesis | NA       |
| unknown | NA | NA | NA | SJC_S002125 | NA | NA | NA | Sjp_0088580.1 | NA                                            | NA       |
| unknown | NA | NA | NA | SJC_S002127 | NA | NA | NA | Sjp_0088590.1 | NA                                            | NA       |
| unknown | NA | NA | NA | SJC_S002128 | NA | NA | NA | Sjp_0088600.1 | NA                                            | NA       |
| unknown | NA | NA | NA | SJC_S002131 | NA | NA | NA | Sjp_0088610.1 | NA                                            | NA       |
| unknown | NA | NA | NA | SJC_S002133 | NA | NA | NA | Sjp_0088630.1 | NA                                            | NA       |
| unknown | NA | NA | NA | SJC_S002135 | NA | NA | NA | Sjp_0088640.1 | biological regulation                         | 0.76396  |
| unknown | NA | NA | NA | SJC_S002137 | NA | NA | NA | Sjp_0088650.1 | cell part                                     | 0.009037 |
| unknown | NA | NA | NA | SJC_S002138 | NA | NA | NA | Sjp_0088660.1 | NA                                            | NA       |
| unknown | NA | NA | NA | SJC_S002139 | NA | NA | NA | Sjp_0088670.1 | NA                                            | NA       |
| unknown | NA | NA | NA | SJC_S002140 | NA | NA | NA | Sjp_0088680.1 | metabolic process                             | 0.41934  |
| unknown | NA | NA | NA | SJC_S002141 | NA | NA | NA | Sjp_0088690.1 | cellular process                              | 0.63852  |
| unknown | NA | NA | NA | SJC_S002142 | NA | NA | NA | Sjp_0088700.1 | NA                                            | NA       |
| unknown | NA | NA | NA | SJC_S002143 | NA | NA | NA | Sjp_0088710.1 | biological regulation                         | 0.76396  |
| unknown | NA | NA | NA | SJC_S002145 | NA | NA | NA | Sjp_0088720.1 | NA                                            | NA       |
| unknown | NA | NA | NA | SJC_S002147 | NA | NA | NA | Sjp_0088740.1 | NA                                            | NA       |
| unknown | NA | NA | NA | SJC_S002148 | NA | NA | NA | Sjp_0088750.1 | NA                                            | NA       |
| unknown | NA | NA | NA | SJC_S002150 | NA | NA | NA | Sjp_0088760.1 | biological regulation                         | 0.76396  |
| unknown | NA | NA | NA | SJC_S002151 | NA | NA | NA | Sjp_0088770.1 | NA                                            | NA       |
| unknown | NA | NA | NA | SJC_S002152 | NA | NA | NA | Sjp_0088780.1 | NA                                            | NA       |
| unknown | NA | NA | NA | SJC_S002155 | NA | NA | NA | Sjp_0088790.1 | NA                                            | NA       |
| unknown | NA | NA | NA | SJC_S002156 | NA | NA | NA | Sjp_0088800.1 | NA                                            | NA       |
| unknown | NA | NA | NA | SJC_S002156 | NA | NA | NA | Sjp_0088810.1 | NA                                            | NA       |
| unknown | NA | NA | NA | SJC_S002158 | NA | NA | NA | Sjp_0088820.1 | NA                                            | NA       |
| unknown | NA | NA | NA | SJC_S002160 | NA | NA | NA | Sjp_0088830.1 | NA                                            | NA       |
| unknown | NA | NA | NA | SJC_S002160 | NA | NA | NA | Sjp_0088840.1 | NA                                            | NA       |

|              |    |          |          |             |       |       |    |               |                               |          |
|--------------|----|----------|----------|-------------|-------|-------|----|---------------|-------------------------------|----------|
| unknown      | NA | NA       | NA       | SJC_S002161 | NA    | NA    | NA | Sjp_0088850.1 | NA                            | NA       |
| unknown      | NA | NA       | NA       | SJC_S002164 | NA    | NA    | NA | Sjp_0088860.1 | NA                            | NA       |
| HSB10kb_1258 | 6  | 17985537 | 17998336 | SJC_S002164 | 14882 | 26330 | +  | Sjp_0088870.1 | NA                            | NA       |
| unknown      | NA | NA       | NA       | SJC_S002166 | NA    | NA    | NA | Sjp_0088880.1 | NA                            | NA       |
| unknown      | NA | NA       | NA       | SJC_S002167 | NA    | NA    | NA | Sjp_0088890.1 | NA                            | NA       |
| unknown      | NA | NA       | NA       | SJC_S002170 | NA    | NA    | NA | Sjp_0088900.1 | binding                       | 0.052762 |
| unknown      | NA | NA       | NA       | SJC_S002171 | NA    | NA    | NA | Sjp_0088910.1 | catalytic activity            | 0.035844 |
| unknown      | NA | NA       | NA       | SJC_S002176 | NA    | NA    | NA | Sjp_0088920.1 | NA                            | NA       |
| unknown      | NA | NA       | NA       | SJC_S002184 | NA    | NA    | NA | Sjp_0088930.1 | molecular transducer activity | 0.50162  |
| unknown      | NA | NA       | NA       | SJC_S002189 | NA    | NA    | NA | Sjp_0088940.1 | catalytic activity            | 0.035844 |
| unknown      | NA | NA       | NA       | SJC_S002192 | NA    | NA    | NA | Sjp_0088950.1 | NA                            | NA       |
| unknown      | NA | NA       | NA       | SJC_S002193 | NA    | NA    | NA | Sjp_0088960.1 | binding                       | 0.052762 |
| unknown      | NA | NA       | NA       | SJC_S002194 | NA    | NA    | NA | Sjp_0088970.1 | catalytic activity            | 0.035844 |
| unknown      | NA | NA       | NA       | SJC_S002196 | NA    | NA    | NA | Sjp_0088980.1 | NA                            | NA       |
| unknown      | NA | NA       | NA       | SJC_S002198 | NA    | NA    | NA | Sjp_0088990.1 | NA                            | NA       |
| unknown      | NA | NA       | NA       | SJC_S002203 | NA    | NA    | NA | Sjp_0089000.1 | NA                            | NA       |
| unknown      | NA | NA       | NA       | SJC_S002205 | NA    | NA    | NA | Sjp_0089010.1 | cell part                     | 0.009037 |
| unknown      | NA | NA       | NA       | SJC_S002209 | NA    | NA    | NA | Sjp_0089030.1 | NA                            | NA       |
| unknown      | NA | NA       | NA       | SJC_S002210 | NA    | NA    | NA | Sjp_0089040.1 | NA                            | NA       |
| unknown      | NA | NA       | NA       | SJC_S002211 | NA    | NA    | NA | Sjp_0089050.1 | NA                            | NA       |
| unknown      | NA | NA       | NA       | SJC_S002211 | NA    | NA    | NA | Sjp_0089060.1 | NA                            | NA       |
| unknown      | NA | NA       | NA       | SJC_S002211 | NA    | NA    | NA | Sjp_0089070.1 | NA                            | NA       |
| unknown      | NA | NA       | NA       | SJC_S002212 | NA    | NA    | NA | Sjp_0089080.1 | catalytic activity            | 0.035844 |
| unknown      | NA | NA       | NA       | SJC_S002215 | NA    | NA    | NA | Sjp_0089090.1 | NA                            | NA       |
| unknown      | NA | NA       | NA       | SJC_S002217 | NA    | NA    | NA | Sjp_0089100.1 | NA                            | NA       |
| unknown      | NA | NA       | NA       | SJC_S002219 | NA    | NA    | NA | Sjp_0089110.1 | NA                            | NA       |
| unknown      | NA | NA       | NA       | SJC_S002223 | NA    | NA    | NA | Sjp_0089120.1 | NA                            | NA       |
| unknown      | NA | NA       | NA       | SJC_S002223 | NA    | NA    | NA | Sjp_0089130.1 | NA                            | NA       |
| unknown      | NA | NA       | NA       | SJC_S002224 | NA    | NA    | NA | Sjp_0089140.1 | NA                            | NA       |
| unknown      | NA | NA       | NA       | SJC_S002225 | NA    | NA    | NA | Sjp_0089150.1 | NA                            | NA       |
| HSB10kb_1259 | WZ | 19317817 | 19331519 | SJC_S002226 | 2431  | 17937 | -  | Sjp_0089160.1 | NA                            | NA       |
| unknown      | NA | NA       | NA       | SJC_S002227 | NA    | NA    | NA | Sjp_0089170.1 | NA                            | NA       |



|              |       |          |          |             |       |        |    |               |                       |          |
|--------------|-------|----------|----------|-------------|-------|--------|----|---------------|-----------------------|----------|
| HSB10kb_1260 | 1     | 56152549 | 56207800 | SJC_S002228 | 35961 | 90144  | +  | Sjp_0089180.1 | NA                    | NA       |
| HSB10kb_1260 | 1     | 56152549 | 56207800 | SJC_S002228 | 35961 | 90144  | +  | Sjp_0089190.1 | NA                    | NA       |
| HSB10kb_1261 | 2     | 17963235 | 17979045 | SJC_S002229 | 3487  | 18497  | +  | Sjp_0089200.1 | NA                    | NA       |
| EBR10kb_474  | "2,2" | NA       | NA       | SJC_S002229 | 18498 | 47908  | NA | Sjp_0089200.1 | NA                    | NA       |
| EBR10kb_474  | "2,2" | NA       | NA       | SJC_S002229 | 18498 | 47908  | NA | Sjp_0089210.1 | NA                    | NA       |
| HSB10kb_1262 | 2     | 18111903 | 18161663 | SJC_S002229 | 47909 | 91119  | -  | Sjp_0089210.1 | NA                    | NA       |
| HSB10kb_1262 | 2     | 18111903 | 18161663 | SJC_S002229 | 47909 | 91119  | -  | Sjp_0089220.1 | NA                    | NA       |
| unknown      | NA    | NA       | NA       | SJC_S002229 | NA    | NA     | NA | Sjp_0089230.1 | NA                    | NA       |
| unknown      | NA    | NA       | NA       | SJC_S002229 | NA    | NA     | NA | Sjp_0089240.1 | NA                    | NA       |
| unknown      | NA    | NA       | NA       | SJC_S002230 | NA    | NA     | NA | Sjp_0089250.1 | catalytic activity    | 0.035844 |
| unknown      | NA    | NA       | NA       | SJC_S002230 | NA    | NA     | NA | Sjp_0089260.1 | binding               | 0.052762 |
| unknown      | NA    | NA       | NA       | SJC_S002230 | NA    | NA     | NA | Sjp_0089270.1 | NA                    | NA       |
| unknown      | NA    | NA       | NA       | SJC_S002231 | NA    | NA     | NA | Sjp_0089280.1 | biological regulation | 0.76396  |
| unknown      | NA    | NA       | NA       | SJC_S002231 | NA    | NA     | NA | Sjp_0089290.1 | cell part             | 0.009037 |
| unknown      | NA    | NA       | NA       | SJC_S002231 | NA    | NA     | NA | Sjp_0089300.1 | transporter activity  | 0.782    |
| unknown      | NA    | NA       | NA       | SJC_S002231 | NA    | NA     | NA | Sjp_0089310.1 | NA                    | NA       |
| unknown      | NA    | NA       | NA       | SJC_S002231 | NA    | NA     | NA | Sjp_0089320.1 | catalytic activity    | 0.035844 |
| unknown      | NA    | NA       | NA       | SJC_S002232 | NA    | NA     | NA | Sjp_0089330.1 | NA                    | NA       |
| HSB10kb_1263 | 1     | 58659492 | 58675715 | SJC_S002232 | 9508  | 26654  | -  | Sjp_0089340.1 | NA                    | NA       |
| EBR10kb_475  | "1,1" | NA       | NA       | SJC_S002232 | 26655 | 46472  | NA | Sjp_0089340.1 | NA                    | NA       |
| EBR10kb_475  | "1,1" | NA       | NA       | SJC_S002232 | 26655 | 46472  | NA | Sjp_0089350.1 | NA                    | NA       |
| EBR10kb_475  | "1,1" | NA       | NA       | SJC_S002232 | 26655 | 46472  | NA | Sjp_0089360.1 | NA                    | NA       |
| HSB10kb_1264 | 1     | 58598257 | 58639965 | SJC_S002232 | 46473 | 75376  | +  | Sjp_0089360.1 | NA                    | NA       |
| HSB10kb_1265 | 4     | 2033886  | 2160533  | SJC_S002233 | 41734 | 170386 | +  | Sjp_0089370.1 | NA                    | NA       |
| HSB10kb_1265 | 4     | 2033886  | 2160533  | SJC_S002233 | 41734 | 170386 | +  | Sjp_0089380.1 | NA                    | NA       |
| HSB10kb_1266 | 4     | 8107574  | 8245431  | SJC_S002234 | 11016 | 147376 | -  | Sjp_0089390.1 | NA                    | NA       |
| HSB10kb_1266 | 4     | 8107574  | 8245431  | SJC_S002234 | 11016 | 147376 | -  | Sjp_0089400.1 | binding               | 0.052762 |
| HSB10kb_1266 | 4     | 8107574  | 8245431  | SJC_S002234 | 11016 | 147376 | -  | Sjp_0089410.1 | cell part             | 0.009037 |
| unknown      | NA    | NA       | NA       | SJC_S002235 | NA    | NA     | NA | Sjp_0089420.1 | NA                    | NA       |
| unknown      | NA    | NA       | NA       | SJC_S002235 | NA    | NA     | NA | Sjp_0089430.1 | cell part             | 0.009037 |
| unknown      | NA    | NA       | NA       | SJC_S002235 | NA    | NA     | NA | Sjp_0089440.1 | catalytic activity    | 0.035844 |
| unknown      | NA    | NA       | NA       | SJC_S002235 | NA    | NA     | NA | Sjp_0089450.1 | NA                    | NA       |

|              |    |          |          |             |       |        |    |               |                                               |          |
|--------------|----|----------|----------|-------------|-------|--------|----|---------------|-----------------------------------------------|----------|
| unknown      | NA | NA       | NA       | SJC_S002236 | NA    | NA     | NA | Sjp_0089460.1 | NA                                            | NA       |
| HSB10kb_1267 | 3  | 7713697  | 7815651  | SJC_S002236 | 82921 | 139456 | -  | Sjp_0089470.1 | NA                                            | NA       |
| HSB10kb_1267 | 3  | 7713697  | 7815651  | SJC_S002236 | 82921 | 139456 | -  | Sjp_0089480.1 | NA                                            | NA       |
| HSB10kb_1267 | 3  | 7713697  | 7815651  | SJC_S002236 | 82921 | 139456 | -  | Sjp_0089490.1 | NA                                            | NA       |
| HSB10kb_1267 | 3  | 7713697  | 7815651  | SJC_S002236 | 82921 | 139456 | -  | Sjp_0089500.1 | NA                                            | NA       |
| HSB10kb_1268 | WZ | 44938796 | 44959577 | SJC_S002237 | 6591  | 31747  | +  | Sjp_0089510.1 | biological regulation                         | 0.76396  |
| unknown      | NA | NA       | NA       | SJC_S002237 | NA    | NA     | NA | Sjp_0089520.1 | NA                                            | NA       |
| HSB10kb_1269 | 2  | 22873359 | 22971007 | SJC_S002238 | 13037 | 106448 | +  | Sjp_0089540.1 | biological regulation                         | 0.76396  |
| HSB10kb_1269 | 2  | 22873359 | 22971007 | SJC_S002238 | 13037 | 106448 | +  | Sjp_0089550.1 | NA                                            | NA       |
| unknown      | NA | NA       | NA       | SJC_S002239 | NA    | NA     | NA | Sjp_0089560.1 | NA                                            | NA       |
| HSB10kb_1270 | 1  | 53514254 | 53571854 | SJC_S002239 | 21828 | 79287  | -  | Sjp_0089570.1 | molecular transducer activity                 | 0.50162  |
| unknown      | NA | NA       | NA       | SJC_S002240 | NA    | NA     | NA | Sjp_0089580.1 | NA                                            | NA       |
| unknown      | NA | NA       | NA       | SJC_S002240 | NA    | NA     | NA | Sjp_0089590.1 | NA                                            | NA       |
| unknown      | NA | NA       | NA       | SJC_S002240 | NA    | NA     | NA | Sjp_0089600.1 | cellular process                              | 0.63852  |
| unknown      | NA | NA       | NA       | SJC_S002240 | NA    | NA     | NA | Sjp_0089610.1 | cell part                                     | 0.009037 |
| HSB10kb_1271 | 4  | 24491483 | 24610144 | SJC_S002241 | 19435 | 100676 | -  | Sjp_0089620.1 | NA                                            | NA       |
| HSB10kb_1271 | 4  | 24491483 | 24610144 | SJC_S002241 | 19435 | 100676 | -  | Sjp_0089630.1 | cellular component organization or biogenesis | NA       |
| HSB10kb_1271 | 4  | 24491483 | 24610144 | SJC_S002241 | 19435 | 100676 | -  | Sjp_0089640.1 | catalytic activity                            | 0.035844 |
| HSB10kb_1271 | 4  | 24491483 | 24610144 | SJC_S002241 | 19435 | 100676 | -  | Sjp_0089650.1 | NA                                            | NA       |
| HSB10kb_1271 | 4  | 24491483 | 24610144 | SJC_S002241 | 19435 | 100676 | -  | Sjp_0089660.1 | catalytic activity                            | 0.035844 |
| HSB10kb_1271 | 4  | 24491483 | 24610144 | SJC_S002241 | 19435 | 100676 | -  | Sjp_0089670.1 | cellular process                              | 0.63852  |
| HSB10kb_1271 | 4  | 24491483 | 24610144 | SJC_S002241 | 19435 | 100676 | -  | Sjp_0089680.1 | NA                                            | NA       |
| unknown      | NA | NA       | NA       | SJC_S002242 | NA    | NA     | NA | Sjp_0089690.1 | NA                                            | NA       |
| unknown      | NA | NA       | NA       | SJC_S002242 | NA    | NA     | NA | Sjp_0089700.1 | NA                                            | NA       |
| unknown      | NA | NA       | NA       | SJC_S002242 | NA    | NA     | NA | Sjp_0089710.1 | NA                                            | NA       |
| unknown      | NA | NA       | NA       | SJC_S002242 | NA    | NA     | NA | Sjp_0089720.1 | NA                                            | NA       |
| unknown      | NA | NA       | NA       | SJC_S002242 | NA    | NA     | NA | Sjp_0089730.1 | NA                                            | NA       |

|              |    |          |          |             |       |        |    |               |                                  |          |
|--------------|----|----------|----------|-------------|-------|--------|----|---------------|----------------------------------|----------|
| unknown      | NA | NA       | NA       | SJC_S002246 | NA    | NA     | NA | Sjp_0089740.1 | binding                          | 0.052762 |
| unknown      | NA | NA       | NA       | SJC_S002247 | NA    | NA     | NA | Sjp_0089750.1 | NA                               | NA       |
| unknown      | NA | NA       | NA       | SJC_S002247 | NA    | NA     | NA | Sjp_0089760.1 | NA                               | NA       |
| HSB10kb_1272 | 4  | 16985923 | 17029950 | SJC_S002248 | 89150 | 130231 | +  | Sjp_0089770.1 | cell part                        | 0.009037 |
| unknown      | NA | NA       | NA       | SJC_S002249 | NA    | NA     | NA | Sjp_0089780.1 | NA                               | NA       |
| unknown      | NA | NA       | NA       | SJC_S002249 | NA    | NA     | NA | Sjp_0089790.1 | NA                               | NA       |
| unknown      | NA | NA       | NA       | SJC_S002249 | NA    | NA     | NA | Sjp_0089800.1 | NA                               | NA       |
| unknown      | NA | NA       | NA       | SJC_S002249 | NA    | NA     | NA | Sjp_0089810.1 | biological regulation            | 0.76396  |
| unknown      | NA | NA       | NA       | SJC_S002250 | NA    | NA     | NA | Sjp_0089820.1 | NA                               | NA       |
| unknown      | NA | NA       | NA       | SJC_S002250 | NA    | NA     | NA | Sjp_0089830.1 | NA                               | NA       |
| HSB10kb_1273 | 1  | 12075009 | 12132605 | SJC_S002251 | 5409  | 68936  | +  | Sjp_0089840.1 | catalytic activity               | 0.035844 |
| HSB10kb_1273 | 1  | 12075009 | 12132605 | SJC_S002251 | 5409  | 68936  | +  | Sjp_0089850.1 | NA                               | NA       |
| HSB10kb_1273 | 1  | 12075009 | 12132605 | SJC_S002251 | 5409  | 68936  | +  | Sjp_0089860.1 | NA                               | NA       |
| HSB10kb_1274 | WZ | 39161926 | 39227245 | SJC_S002252 | 3172  | 69108  | -  | Sjp_0089870.1 | NA                               | NA       |
| HSB10kb_1274 | WZ | 39161926 | 39227245 | SJC_S002252 | 3172  | 69108  | -  | Sjp_0089880.1 | transcription regulator activity | NA       |
| HSB10kb_1274 | WZ | 39161926 | 39227245 | SJC_S002252 | 3172  | 69108  | -  | Sjp_0089890.1 | NA                               | NA       |
| unknown      | NA | NA       | NA       | SJC_S002252 | NA    | NA     | NA | Sjp_0089900.1 | catalytic activity               | 0.035844 |
| HSB10kb_1275 | WZ | 36183585 | 36214965 | SJC_S002253 | 11791 | 47294  | +  | Sjp_0089910.1 | NA                               | NA       |
| HSB10kb_1275 | WZ | 36183585 | 36214965 | SJC_S002253 | 11791 | 47294  | +  | Sjp_0089920.1 | NA                               | NA       |
| unknown      | NA | NA       | NA       | SJC_S002254 | NA    | NA     | NA | Sjp_0089930.1 | NA                               | NA       |
| unknown      | NA | NA       | NA       | SJC_S002254 | NA    | NA     | NA | Sjp_0089940.1 | transporter activity             | 0.782    |
| unknown      | NA | NA       | NA       | SJC_S002256 | NA    | NA     | NA | Sjp_0089950.1 | NA                               | NA       |
| unknown      | NA | NA       | NA       | SJC_S002257 | NA    | NA     | NA | Sjp_0089960.1 | biological regulation            | 0.76396  |
| unknown      | NA | NA       | NA       | SJC_S002257 | NA    | NA     | NA | Sjp_0089970.1 | NA                               | NA       |
| unknown      | NA | NA       | NA       | SJC_S002258 | NA    | NA     | NA | Sjp_0089980.1 | NA                               | NA       |
| unknown      | NA | NA       | NA       | SJC_S002258 | NA    | NA     | NA | Sjp_0089990.1 | catalytic activity               | 0.035844 |
| unknown      | NA | NA       | NA       | SJC_S002259 | NA    | NA     | NA | Sjp_0090000.1 | NA                               | NA       |
| HSB10kb_1276 | WZ | 10806957 | 10891823 | SJC_S002260 | 16192 | 49246  | -  | Sjp_0090010.1 | NA                               | NA       |
| HSB10kb_1276 | WZ | 10806957 | 10891823 | SJC_S002260 | 16192 | 49246  | -  | Sjp_0090020.1 | NA                               | NA       |

|              |    |          |          |             |       |       |    |               |                       |          |
|--------------|----|----------|----------|-------------|-------|-------|----|---------------|-----------------------|----------|
| unknown      | NA | NA       | NA       | SJC_S002261 | NA    | NA    | NA | Sjp_0090030.1 | NA                    | NA       |
| unknown      | NA | NA       | NA       | SJC_S002262 | NA    | NA    | NA | Sjp_0090040.1 | binding               | 0.052762 |
| unknown      | NA | NA       | NA       | SJC_S002266 | NA    | NA    | NA | Sjp_0090050.1 | NA                    | NA       |
| unknown      | NA | NA       | NA       | SJC_S002266 | NA    | NA    | NA | Sjp_0090060.1 | NA                    | NA       |
| unknown      | NA | NA       | NA       | SJC_S002267 | NA    | NA    | NA | Sjp_0090070.1 | cell part             | 0.009037 |
| unknown      | NA | NA       | NA       | SJC_S002267 | NA    | NA    | NA | Sjp_0090080.1 | cell part             | 0.009037 |
| HSB10kb_1277 | 3  | 7998083  | 8016030  | SJC_S002267 | 11006 | 26638 | -  | Sjp_0090090.1 | cell part             | 0.009037 |
| HSB10kb_1277 | 3  | 7998083  | 8016030  | SJC_S002267 | 11006 | 26638 | -  | Sjp_0090100.1 | cell part             | 0.009037 |
| unknown      | NA | NA       | NA       | SJC_S002269 | NA    | NA    | NA | Sjp_0090110.1 | NA                    | NA       |
| unknown      | NA | NA       | NA       | SJC_S002269 | NA    | NA    | NA | Sjp_0090120.1 | NA                    | NA       |
| unknown      | NA | NA       | NA       | SJC_S002270 | NA    | NA    | NA | Sjp_0090130.1 | NA                    | NA       |
| unknown      | NA | NA       | NA       | SJC_S002271 | NA    | NA    | NA | Sjp_0090140.1 | NA                    | NA       |
| unknown      | NA | NA       | NA       | SJC_S002272 | NA    | NA    | NA | Sjp_0090150.1 | catalytic activity    | 0.035844 |
| unknown      | NA | NA       | NA       | SJC_S002272 | NA    | NA    | NA | Sjp_0090160.1 | catalytic activity    | 0.035844 |
| unknown      | NA | NA       | NA       | SJC_S002273 | NA    | NA    | NA | Sjp_0090170.1 | biological regulation | 0.76396  |
| HSB10kb_1278 | 1  | 379982   | 405305   | SJC_S002274 | 43910 | 61650 | +  | NA            | NA                    | NA       |
| unknown      | NA | NA       | NA       | SJC_S002275 | NA    | NA    | NA | Sjp_0090190.1 | NA                    | NA       |
| unknown      | NA | NA       | NA       | SJC_S002275 | NA    | NA    | NA | Sjp_0090200.1 | cell part             | 0.009037 |
| unknown      | NA | NA       | NA       | SJC_S002276 | NA    | NA    | NA | Sjp_0090210.1 | NA                    | NA       |
| unknown      | NA | NA       | NA       | SJC_S002276 | NA    | NA    | NA | Sjp_0090220.1 | NA                    | NA       |
| HSB10kb_1279 | 1  | 39709753 | 39811468 | SJC_S002277 | 286   | 86024 | +  | Sjp_0090230.1 | NA                    | NA       |
| HSB10kb_1279 | 1  | 39709753 | 39811468 | SJC_S002277 | 286   | 86024 | +  | Sjp_0090240.1 | NA                    | NA       |
| HSB10kb_1279 | 1  | 39709753 | 39811468 | SJC_S002277 | 286   | 86024 | +  | Sjp_0090250.1 | catalytic activity    | 0.035844 |
| unknown      | NA | NA       | NA       | SJC_S002278 | NA    | NA    | NA | Sjp_0090260.1 | catalytic activity    | 0.035844 |
| unknown      | NA | NA       | NA       | SJC_S002279 | NA    | NA    | NA | Sjp_0090270.1 | NA                    | NA       |
| unknown      | NA | NA       | NA       | SJC_S002282 | NA    | NA    | NA | Sjp_0090280.1 | NA                    | NA       |
| unknown      | NA | NA       | NA       | SJC_S002283 | NA    | NA    | NA | Sjp_0090290.1 | NA                    | NA       |
| unknown      | NA | NA       | NA       | SJC_S002283 | NA    | NA    | NA | Sjp_0090300.1 | catalytic activity    | 0.035844 |
| unknown      | NA | NA       | NA       | SJC_S002284 | NA    | NA    | NA | Sjp_0090310.1 | catalytic activity    | 0.035844 |
| unknown      | NA | NA       | NA       | SJC_S002285 | NA    | NA    | NA | Sjp_0090320.1 | NA                    | NA       |
| unknown      | NA | NA       | NA       | SJC_S002286 | NA    | NA    | NA | Sjp_0090330.1 | NA                    | NA       |
| HSB10kb_1280 | 1  | 28777390 | 28852112 | SJC_S002287 | 1741  | 43843 | +  | Sjp_0090340.1 | NA                    | NA       |
| HSB10kb_1280 | 1  | 28777390 | 28852112 | SJC_S002287 | 1741  | 43843 | +  | Sjp_0090360.1 | cell part             | 0.009037 |

|              |    |          |          |             |      |       |    |               |                                               |          |
|--------------|----|----------|----------|-------------|------|-------|----|---------------|-----------------------------------------------|----------|
| unknown      | NA | NA       | NA       | SJC_S002287 | NA   | NA    | NA | Sjp_0090370.1 | NA                                            | NA       |
| unknown      | NA | NA       | NA       | SJC_S002288 | NA   | NA    | NA | Sjp_0090380.1 | biological regulation                         | 0.76396  |
| HSB10kb_1281 | 4  | 28153603 | 28173824 | SJC_S002289 | 9481 | 29885 | -  | Sjp_0090390.1 | cell part                                     | 0.009037 |
| HSB10kb_1282 | 4  | 2184302  | 2240089  | SJC_S002290 | 5779 | 55589 | +  | Sjp_0090400.1 | binding                                       | 0.052762 |
| HSB10kb_1282 | 4  | 2184302  | 2240089  | SJC_S002290 | 5779 | 55589 | +  | Sjp_0090410.1 | catalytic activity                            | 0.035844 |
| HSB10kb_1282 | 4  | 2184302  | 2240089  | SJC_S002290 | 5779 | 55589 | +  | Sjp_0090420.1 | NA                                            | NA       |
| HSB10kb_1282 | 4  | 2184302  | 2240089  | SJC_S002290 | 5779 | 55589 | +  | Sjp_0090430.1 | NA                                            | NA       |
| unknown      | NA | NA       | NA       | SJC_S002292 | NA   | NA    | NA | Sjp_0090450.1 | binding                                       | 0.052762 |
| unknown      | NA | NA       | NA       | SJC_S002293 | NA   | NA    | NA | Sjp_0090460.1 | NA                                            | NA       |
| unknown      | NA | NA       | NA       | SJC_S002295 | NA   | NA    | NA | Sjp_0090470.1 | NA                                            | NA       |
| HSB10kb_1283 | 5  | 5127224  | 5155937  | SJC_S002298 | 4285 | 33678 | -  | Sjp_0090490.1 | biological regulation                         | 0.76396  |
| unknown      | NA | NA       | NA       | SJC_S002298 | NA   | NA    | NA | Sjp_0090500.1 | NA                                            | NA       |
| unknown      | NA | NA       | NA       | SJC_S002299 | NA   | NA    | NA | Sjp_0090510.1 | NA                                            | NA       |
| unknown      | NA | NA       | NA       | SJC_S002300 | NA   | NA    | NA | Sjp_0090520.1 | NA                                            | NA       |
| unknown      | NA | NA       | NA       | SJC_S002301 | NA   | NA    | NA | Sjp_0090530.1 | NA                                            | NA       |
| unknown      | NA | NA       | NA       | SJC_S002303 | NA   | NA    | NA | Sjp_0090540.1 | NA                                            | NA       |
| unknown      | NA | NA       | NA       | SJC_S002303 | NA   | NA    | NA | Sjp_0090550.1 | NA                                            | NA       |
| HSB10kb_1284 | 3  | 91942    | 118434   | SJC_S002304 | 7314 | 28488 | -  | Sjp_0090560.1 | cellular component organization or biogenesis | NA       |
| unknown      | NA | NA       | NA       | SJC_S002305 | NA   | NA    | NA | Sjp_0090570.1 | biological regulation                         | 0.76396  |
| unknown      | NA | NA       | NA       | SJC_S002308 | NA   | NA    | NA | Sjp_0090580.1 | NA                                            | NA       |
| unknown      | NA | NA       | NA       | SJC_S002309 | NA   | NA    | NA | Sjp_0090590.1 | cell part                                     | 0.009037 |
| unknown      | NA | NA       | NA       | SJC_S002309 | NA   | NA    | NA | Sjp_0090600.1 | NA                                            | NA       |
| unknown      | NA | NA       | NA       | SJC_S002310 | NA   | NA    | NA | Sjp_0090610.1 | NA                                            | NA       |
| unknown      | NA | NA       | NA       | SJC_S002310 | NA   | NA    | NA | Sjp_0090620.1 | NA                                            | NA       |
| unknown      | NA | NA       | NA       | SJC_S002310 | NA   | NA    | NA | Sjp_0090630.1 | NA                                            | NA       |
| unknown      | NA | NA       | NA       | SJC_S002311 | NA   | NA    | NA | Sjp_0090640.1 | NA                                            | NA       |
| unknown      | NA | NA       | NA       | SJC_S002314 | NA   | NA    | NA | Sjp_0090650.1 | metabolic process                             | 0.41934  |

|              |    |          |          |             |       |       |    |               |                           |          |
|--------------|----|----------|----------|-------------|-------|-------|----|---------------|---------------------------|----------|
| unknown      | NA | NA       | NA       | SJC_S002315 | NA    | NA    | NA | Sjp_0090660.1 | NA                        | NA       |
| unknown      | NA | NA       | NA       | SJC_S002316 | NA    | NA    | NA | Sjp_0090670.1 | NA                        | NA       |
| unknown      | NA | NA       | NA       | SJC_S002317 | NA    | NA    | NA | Sjp_0090680.1 | biological regulation     | 0.76396  |
| unknown      | NA | NA       | NA       | SJC_S002317 | NA    | NA    | NA | Sjp_0090690.1 | NA                        | NA       |
| unknown      | NA | NA       | NA       | SJC_S002318 | NA    | NA    | NA | Sjp_0090700.1 | biological regulation     | 0.76396  |
| HSB10kb_1285 | WZ | 42536341 | 42578204 | SJC_S002318 | 18189 | 69318 | -  | Sjp_0090710.1 | binding                   | 0.052762 |
| HSB10kb_1285 | WZ | 42536341 | 42578204 | SJC_S002318 | 18189 | 69318 | -  | Sjp_0090720.1 | cellular process          | 0.63852  |
| HSB10kb_1285 | WZ | 42536341 | 42578204 | SJC_S002318 | 18189 | 69318 | -  | Sjp_0090730.1 | NA                        | NA       |
| HSB10kb_1285 | WZ | 42536341 | 42578204 | SJC_S002318 | 18189 | 69318 | -  | Sjp_0090740.1 | enzyme regulator activity | 0.1755   |
| unknown      | NA | NA       | NA       | SJC_S002319 | NA    | NA    | NA | Sjp_0090750.1 | NA                        | NA       |
| HSB10kb_1286 | 2  | 22553880 | 22589577 | SJC_S002322 | 9540  | 45060 | +  | Sjp_0090760.1 | biological regulation     | 0.76396  |
| unknown      | NA | NA       | NA       | SJC_S002323 | NA    | NA    | NA | Sjp_0090770.1 | NA                        | NA       |
| unknown      | NA | NA       | NA       | SJC_S002324 | NA    | NA    | NA | Sjp_0090780.1 | NA                        | NA       |
| unknown      | NA | NA       | NA       | SJC_S002326 | NA    | NA    | NA | Sjp_0090790.1 | NA                        | NA       |
| unknown      | NA | NA       | NA       | SJC_S002327 | NA    | NA    | NA | Sjp_0090800.1 | NA                        | NA       |
| unknown      | NA | NA       | NA       | SJC_S002328 | NA    | NA    | NA | Sjp_0090810.1 | NA                        | NA       |
| unknown      | NA | NA       | NA       | SJC_S002328 | NA    | NA    | NA | Sjp_0090820.1 | response to stimulus      | NA       |
| unknown      | NA | NA       | NA       | SJC_S002331 | NA    | NA    | NA | Sjp_0090830.1 | NA                        | NA       |
| HSB10kb_1287 | 4  | 24957462 | 24995073 | SJC_S002332 | 5599  | 39089 | -  | Sjp_0090840.1 | NA                        | NA       |
| HSB10kb_1287 | 4  | 24957462 | 24995073 | SJC_S002332 | 5599  | 39089 | -  | Sjp_0090850.1 | catalytic activity        | 0.035844 |
| unknown      | NA | NA       | NA       | SJC_S002334 | NA    | NA    | NA | Sjp_0090860.1 | enzyme regulator activity | 0.1755   |
| unknown      | NA | NA       | NA       | SJC_S002336 | NA    | NA    | NA | Sjp_0090880.1 | NA                        | NA       |
| unknown      | NA | NA       | NA       | SJC_S002337 | NA    | NA    | NA | Sjp_0090890.1 | NA                        | NA       |
| unknown      | NA | NA       | NA       | SJC_S002340 | NA    | NA    | NA | Sjp_0090900.1 | NA                        | NA       |
| unknown      | NA | NA       | NA       | SJC_S002340 | NA    | NA    | NA | Sjp_0090910.1 | NA                        | NA       |
| unknown      | NA | NA       | NA       | SJC_S002341 | NA    | NA    | NA | Sjp_0090920.1 | extracellular             | NA       |

|              |    |          |          |             |       |       |    |               |                                               |          |
|--------------|----|----------|----------|-------------|-------|-------|----|---------------|-----------------------------------------------|----------|
|              |    |          |          |             |       |       |    |               | region part                                   |          |
| HSB10kb_1288 | WZ | 51683824 | 51694870 | SJC_S002342 | 31438 | 43942 | -  | Sjp_0090930.1 | NA                                            | NA       |
| unknown      | NA | NA       | NA       | SJC_S002344 | NA    | NA    | NA | Sjp_0090950.1 | NA                                            | NA       |
| unknown      | NA | NA       | NA       | SJC_S002345 | NA    | NA    | NA | Sjp_0090960.1 | NA                                            | NA       |
| unknown      | NA | NA       | NA       | SJC_S002346 | NA    | NA    | NA | Sjp_0090970.1 | response to stimulus                          | NA       |
| unknown      | NA | NA       | NA       | SJC_S002347 | NA    | NA    | NA | Sjp_0090980.1 | response to stimulus                          | NA       |
| unknown      | NA | NA       | NA       | SJC_S002349 | NA    | NA    | NA | Sjp_0090990.1 | NA                                            | NA       |
| unknown      | NA | NA       | NA       | SJC_S002350 | NA    | NA    | NA | Sjp_0091000.1 | NA                                            | NA       |
| unknown      | NA | NA       | NA       | SJC_S002351 | NA    | NA    | NA | Sjp_0091010.1 | catalytic activity                            | 0.035844 |
| unknown      | NA | NA       | NA       | SJC_S002351 | NA    | NA    | NA | Sjp_0091020.1 | binding                                       | 0.052762 |
| unknown      | NA | NA       | NA       | SJC_S002354 | NA    | NA    | NA | Sjp_0091030.1 | cellular component organization or biogenesis | NA       |
| unknown      | NA | NA       | NA       | SJC_S002356 | NA    | NA    | NA | Sjp_0091040.1 | catalytic activity                            | 0.035844 |
| unknown      | NA | NA       | NA       | SJC_S002356 | NA    | NA    | NA | Sjp_0091050.1 | NA                                            | NA       |
| unknown      | NA | NA       | NA       | SJC_S002357 | NA    | NA    | NA | Sjp_0091060.1 | NA                                            | NA       |
| unknown      | NA | NA       | NA       | SJC_S002357 | NA    | NA    | NA | Sjp_0091070.1 | metabolic process                             | 0.41934  |
| unknown      | NA | NA       | NA       | SJC_S002359 | NA    | NA    | NA | Sjp_0091080.1 | catalytic activity                            | 0.035844 |
| unknown      | NA | NA       | NA       | SJC_S002360 | NA    | NA    | NA | Sjp_0091090.1 | NA                                            | NA       |
| unknown      | NA | NA       | NA       | SJC_S002361 | NA    | NA    | NA | Sjp_0091100.1 | NA                                            | NA       |
| unknown      | NA | NA       | NA       | SJC_S002363 | NA    | NA    | NA | Sjp_0091110.1 | binding                                       | 0.052762 |
| HSB10kb_1289 | 2  | 28014257 | 28030821 | SJC_S002364 | 5717  | 21450 | -  | Sjp_0091120.1 | cell part                                     | 0.009037 |
| HSB10kb_1289 | 2  | 28014257 | 28030821 | SJC_S002364 | 5717  | 21450 | -  | Sjp_0091130.1 | NA                                            | NA       |
| unknown      | NA | NA       | NA       | SJC_S002365 | NA    | NA    | NA | Sjp_0091140.1 | NA                                            | NA       |
| unknown      | NA | NA       | NA       | SJC_S002366 | NA    | NA    | NA | Sjp_0091150.1 | binding                                       | 0.052762 |
| unknown      | NA | NA       | NA       | SJC_S002366 | NA    | NA    | NA | Sjp_0091160.1 | NA                                            | NA       |
| unknown      | NA | NA       | NA       | SJC_S002367 | NA    | NA    | NA | Sjp_0091180.1 | catalytic activity                            | 0.035844 |
| unknown      | NA | NA       | NA       | SJC_S002367 | NA    | NA    | NA | Sjp_0091190.1 | NA                                            | NA       |
| HSB10kb_1290 | 1  | 23497100 | 23511040 | SJC_S002368 | 76    | 11224 | +  | Sjp_0091200.1 | binding                                       | 0.052762 |
| unknown      | NA | NA       | NA       | SJC_S002370 | NA    | NA    | NA | Sjp_0091210.1 | NA                                            | NA       |

|              |    |          |          |             |      |       |    |               |                               |          |
|--------------|----|----------|----------|-------------|------|-------|----|---------------|-------------------------------|----------|
| unknown      | NA | NA       | NA       | SJC_S002371 | NA   | NA    | NA | Sjp_0091220.1 | NA                            | NA       |
| unknown      | NA | NA       | NA       | SJC_S002372 | NA   | NA    | NA | Sjp_0091230.1 | biological regulation         | 0.76396  |
| unknown      | NA | NA       | NA       | SJC_S002374 | NA   | NA    | NA | Sjp_0091240.1 | NA                            | NA       |
| unknown      | NA | NA       | NA       | SJC_S002378 | NA   | NA    | NA | Sjp_0091250.1 | NA                            | NA       |
| HSB10kb_1291 | 1  | 41547100 | 41559841 | SJC_S002379 | 2743 | 13582 | +  | Sjp_0091260.1 | catalytic activity            | 0.035844 |
| unknown      | NA | NA       | NA       | SJC_S002380 | NA   | NA    | NA | Sjp_0091270.1 | NA                            | NA       |
| unknown      | NA | NA       | NA       | SJC_S002383 | NA   | NA    | NA | Sjp_0091280.1 | NA                            | NA       |
| unknown      | NA | NA       | NA       | SJC_S002385 | NA   | NA    | NA | Sjp_0091290.1 | NA                            | NA       |
| unknown      | NA | NA       | NA       | SJC_S002387 | NA   | NA    | NA | Sjp_0091300.1 | NA                            | NA       |
| unknown      | NA | NA       | NA       | SJC_S002389 | NA   | NA    | NA | Sjp_0091310.1 | NA                            | NA       |
| unknown      | NA | NA       | NA       | SJC_S002393 | NA   | NA    | NA | Sjp_0091320.1 | NA                            | NA       |
| unknown      | NA | NA       | NA       | SJC_S002394 | NA   | NA    | NA | Sjp_0091330.1 | NA                            | NA       |
| HSB10kb_1292 | 4  | 12706062 | 12732322 | SJC_S002395 | 7788 | 30182 | -  | Sjp_0091340.1 | NA                            | NA       |
| HSB10kb_1292 | 4  | 12706062 | 12732322 | SJC_S002395 | 7788 | 30182 | -  | Sjp_0091350.1 | NA                            | NA       |
| unknown      | NA | NA       | NA       | SJC_S002396 | NA   | NA    | NA | Sjp_0091360.1 | NA                            | NA       |
| unknown      | NA | NA       | NA       | SJC_S002396 | NA   | NA    | NA | Sjp_0091370.1 | cell part                     | 0.009037 |
| unknown      | NA | NA       | NA       | SJC_S002396 | NA   | NA    | NA | Sjp_0091380.1 | cell part                     | 0.009037 |
| unknown      | NA | NA       | NA       | SJC_S002396 | NA   | NA    | NA | Sjp_0091390.1 | NA                            | NA       |
| unknown      | NA | NA       | NA       | SJC_S002398 | NA   | NA    | NA | Sjp_0091400.1 | establishment of localization | NA       |
| unknown      | NA | NA       | NA       | SJC_S002400 | NA   | NA    | NA | Sjp_0091410.1 | catalytic activity            | 0.035844 |
| unknown      | NA | NA       | NA       | SJC_S002403 | NA   | NA    | NA | Sjp_0091420.1 | NA                            | NA       |
| unknown      | NA | NA       | NA       | SJC_S002404 | NA   | NA    | NA | Sjp_0091430.1 | catalytic activity            | 0.035844 |
| unknown      | NA | NA       | NA       | SJC_S002405 | NA   | NA    | NA | Sjp_0091440.1 | NA                            | NA       |
| unknown      | NA | NA       | NA       | SJC_S002407 | NA   | NA    | NA | Sjp_0091450.1 | NA                            | NA       |
| unknown      | NA | NA       | NA       | SJC_S002407 | NA   | NA    | NA | Sjp_0091460.1 | NA                            | NA       |
| unknown      | NA | NA       | NA       | SJC_S002408 | NA   | NA    | NA | Sjp_0091470.1 | NA                            | NA       |
| unknown      | NA | NA       | NA       | SJC_S002414 | NA   | NA    | NA | Sjp_0091480.1 | NA                            | NA       |
| unknown      | NA | NA       | NA       | SJC_S002415 | NA   | NA    | NA | Sjp_0091490.1 | biological regulation         | 0.76396  |
| unknown      | NA | NA       | NA       | SJC_S002420 | NA   | NA    | NA | Sjp_0091500.1 | binding                       | 0.052762 |
| unknown      | NA | NA       | NA       | SJC_S002422 | NA   | NA    | NA | Sjp_0091510.1 | NA                            | NA       |
| unknown      | NA | NA       | NA       | SJC_S002423 | NA   | NA    | NA | Sjp_0091520.1 | NA                            | NA       |



|              |    |          |          |             |       |       |    |               |                           |          |
|--------------|----|----------|----------|-------------|-------|-------|----|---------------|---------------------------|----------|
| unknown      | NA | NA       | NA       | SJC_S002423 | NA    | NA    | NA | Sjp_0091530.1 | NA                        | NA       |
| unknown      | NA | NA       | NA       | SJC_S002424 | NA    | NA    | NA | Sjp_0091540.1 | NA                        | NA       |
| unknown      | NA | NA       | NA       | SJC_S002425 | NA    | NA    | NA | Sjp_0091550.1 | NA                        | NA       |
| HSB10kb_1293 | 1  | 21659649 | 21688881 | SJC_S002426 | 31366 | 46253 | +  | Sjp_0091560.1 | NA                        | NA       |
| HSB10kb_1293 | 1  | 21659649 | 21688881 | SJC_S002426 | 31366 | 46253 | +  | Sjp_0091570.1 | NA                        | NA       |
| unknown      | NA | NA       | NA       | SJC_S002429 | NA    | NA    | NA | Sjp_0091580.1 | NA                        | NA       |
| unknown      | NA | NA       | NA       | SJC_S002430 | NA    | NA    | NA | Sjp_0091590.1 | enzyme regulator activity | 0.1755   |
| unknown      | NA | NA       | NA       | SJC_S002431 | NA    | NA    | NA | Sjp_0091600.1 | metabolic process         | 0.41934  |
| unknown      | NA | NA       | NA       | SJC_S002437 | NA    | NA    | NA | Sjp_0091610.1 | metabolic process         | 0.41934  |
| unknown      | NA | NA       | NA       | SJC_S002438 | NA    | NA    | NA | Sjp_0091620.1 | NA                        | NA       |
| unknown      | NA | NA       | NA       | SJC_S002439 | NA    | NA    | NA | Sjp_0091630.1 | biological regulation     | 0.76396  |
| unknown      | NA | NA       | NA       | SJC_S002440 | NA    | NA    | NA | Sjp_0091640.1 | NA                        | NA       |
| unknown      | NA | NA       | NA       | SJC_S002446 | NA    | NA    | NA | Sjp_0091650.1 | biological regulation     | 0.76396  |
| unknown      | NA | NA       | NA       | SJC_S002448 | NA    | NA    | NA | Sjp_0091660.1 | NA                        | NA       |
| unknown      | NA | NA       | NA       | SJC_S002449 | NA    | NA    | NA | Sjp_0091670.1 | NA                        | NA       |
| HSB10kb_1294 | WZ | 25822381 | 25837568 | SJC_S002450 | 2423  | 18614 | +  | Sjp_0091680.1 | binding                   | 0.052762 |
| unknown      | NA | NA       | NA       | SJC_S002451 | NA    | NA    | NA | Sjp_0091690.1 | cellular process          | 0.63852  |
| unknown      | NA | NA       | NA       | SJC_S002455 | NA    | NA    | NA | Sjp_0091710.1 | NA                        | NA       |
| unknown      | NA | NA       | NA       | SJC_S002456 | NA    | NA    | NA | Sjp_0091720.1 | NA                        | NA       |
| unknown      | NA | NA       | NA       | SJC_S002457 | NA    | NA    | NA | Sjp_0091730.1 | biological regulation     | 0.76396  |
| unknown      | NA | NA       | NA       | SJC_S002457 | NA    | NA    | NA | Sjp_0091740.1 | NA                        | NA       |
| unknown      | NA | NA       | NA       | SJC_S002458 | NA    | NA    | NA | Sjp_0091750.1 | catalytic activity        | 0.035844 |
| unknown      | NA | NA       | NA       | SJC_S002458 | NA    | NA    | NA | Sjp_0091760.1 | NA                        | NA       |
| unknown      | NA | NA       | NA       | SJC_S002458 | NA    | NA    | NA | Sjp_0091770.1 | NA                        | NA       |
| unknown      | NA | NA       | NA       | SJC_S002458 | NA    | NA    | NA | Sjp_0091780.1 | NA                        | NA       |
| unknown      | NA | NA       | NA       | SJC_S002459 | NA    | NA    | NA | Sjp_0091790.1 | NA                        | NA       |
| unknown      | NA | NA       | NA       | SJC_S002459 | NA    | NA    | NA | Sjp_0091800.1 | biological                | 0.76396  |

|              |    |          |          |             |       |       |    |               |                           |          |
|--------------|----|----------|----------|-------------|-------|-------|----|---------------|---------------------------|----------|
|              |    |          |          |             |       |       |    |               | regulation                |          |
| unknown      | NA | NA       | NA       | SJC_S002460 | NA    | NA    | NA | Sjp_0091810.1 | NA                        | NA       |
| unknown      | NA | NA       | NA       | SJC_S002460 | NA    | NA    | NA | Sjp_0091820.1 | NA                        | NA       |
| unknown      | NA | NA       | NA       | SJC_S002461 | NA    | NA    | NA | Sjp_0091830.1 | NA                        | NA       |
| HSB10kb_1295 | 3  | 11590472 | 11617083 | SJC_S002461 | 56821 | 92926 | +  | Sjp_0091840.1 | NA                        | NA       |
| HSB10kb_1295 | 3  | 11590472 | 11617083 | SJC_S002461 | 56821 | 92926 | +  | Sjp_0091850.1 | NA                        | NA       |
| unknown      | NA | NA       | NA       | SJC_S002461 | NA    | NA    | NA | Sjp_0091860.1 | NA                        | NA       |
| unknown      | NA | NA       | NA       | SJC_S002462 | NA    | NA    | NA | Sjp_0091870.1 | catalytic activity        | 0.035844 |
| unknown      | NA | NA       | NA       | SJC_S002462 | NA    | NA    | NA | Sjp_0091880.1 | NA                        | NA       |
| HSB10kb_1296 | 4  | 29268207 | 29294876 | SJC_S002463 | 11515 | 38282 | +  | Sjp_0091890.1 | transporter activity      | 0.782    |
| HSB10kb_1296 | 4  | 29268207 | 29294876 | SJC_S002463 | 11515 | 38282 | +  | Sjp_0091900.1 | response to stimulus      | NA       |
| HSB10kb_1297 | 4  | 30729748 | 30747766 | SJC_S002464 | 5757  | 24247 | +  | NA            | NA                        | NA       |
| unknown      | NA | NA       | NA       | SJC_S002465 | NA    | NA    | NA | Sjp_0091930.1 | catalytic activity        | 0.035844 |
| unknown      | NA | NA       | NA       | SJC_S002465 | NA    | NA    | NA | Sjp_0091940.1 | biological regulation     | 0.76396  |
| unknown      | NA | NA       | NA       | SJC_S002465 | NA    | NA    | NA | Sjp_0091950.1 | binding                   | 0.052762 |
| unknown      | NA | NA       | NA       | SJC_S002466 | NA    | NA    | NA | Sjp_0091960.1 | NA                        | NA       |
| unknown      | NA | NA       | NA       | SJC_S002466 | NA    | NA    | NA | Sjp_0091970.1 | NA                        | NA       |
| unknown      | NA | NA       | NA       | SJC_S002467 | NA    | NA    | NA | Sjp_0091980.1 | NA                        | NA       |
| unknown      | NA | NA       | NA       | SJC_S002467 | NA    | NA    | NA | Sjp_0091990.1 | NA                        | NA       |
| unknown      | NA | NA       | NA       | SJC_S002468 | NA    | NA    | NA | Sjp_0092000.1 | cell part                 | 0.009037 |
| unknown      | NA | NA       | NA       | SJC_S002468 | NA    | NA    | NA | Sjp_0092010.1 | NA                        | NA       |
| unknown      | NA | NA       | NA       | SJC_S002468 | NA    | NA    | NA | Sjp_0092020.1 | NA                        | NA       |
| unknown      | NA | NA       | NA       | SJC_S002468 | NA    | NA    | NA | Sjp_0092030.1 | NA                        | NA       |
| unknown      | NA | NA       | NA       | SJC_S002469 | NA    | NA    | NA | Sjp_0092040.1 | NA                        | NA       |
| unknown      | NA | NA       | NA       | SJC_S002470 | NA    | NA    | NA | Sjp_0092050.1 | NA                        | NA       |
| unknown      | NA | NA       | NA       | SJC_S002471 | NA    | NA    | NA | Sjp_0092060.1 | metabolic process         | 0.41934  |
| HSB10kb_1298 | WZ | 23152041 | 23194280 | SJC_S002472 | 13541 | 45839 | +  | Sjp_0092070.1 | enzyme regulator activity | 0.1755   |
| HSB10kb_1299 | WZ | 33427580 | 33456571 | SJC_S002473 | 10    | 16105 | +  | Sjp_0092080.1 | NA                        | NA       |

|              |    |          |          |             |      |       |    |               |                               |          |
|--------------|----|----------|----------|-------------|------|-------|----|---------------|-------------------------------|----------|
| HSB10kb_1299 | WZ | 33427580 | 33456571 | SJC_S002473 | 10   | 16105 | +  | Sjp_0092090.1 | NA                            | NA       |
| unknown      | NA | NA       | NA       | SJC_S002474 | NA   | NA    | NA | Sjp_0092100.1 | NA                            | NA       |
| unknown      | NA | NA       | NA       | SJC_S002474 | NA   | NA    | NA | Sjp_0092110.1 | NA                            | NA       |
| unknown      | NA | NA       | NA       | SJC_S002475 | NA   | NA    | NA | Sjp_0092120.1 | NA                            | NA       |
| unknown      | NA | NA       | NA       | SJC_S002475 | NA   | NA    | NA | Sjp_0092130.1 | catalytic activity            | 0.035844 |
| unknown      | NA | NA       | NA       | SJC_S002476 | NA   | NA    | NA | Sjp_0092140.1 | NA                            | NA       |
| unknown      | NA | NA       | NA       | SJC_S002477 | NA   | NA    | NA | Sjp_0092150.1 | NA                            | NA       |
| unknown      | NA | NA       | NA       | SJC_S002477 | NA   | NA    | NA | Sjp_0092160.1 | NA                            | NA       |
| unknown      | NA | NA       | NA       | SJC_S002477 | NA   | NA    | NA | Sjp_0092170.1 | NA                            | NA       |
| unknown      | NA | NA       | NA       | SJC_S002477 | NA   | NA    | NA | Sjp_0092180.1 | NA                            | NA       |
| unknown      | NA | NA       | NA       | SJC_S002478 | NA   | NA    | NA | Sjp_0092190.1 | catalytic activity            | 0.035844 |
| unknown      | NA | NA       | NA       | SJC_S002478 | NA   | NA    | NA | Sjp_0092200.1 | cellular process              | 0.63852  |
| unknown      | NA | NA       | NA       | SJC_S002478 | NA   | NA    | NA | Sjp_0092210.1 | cell part                     | 0.009037 |
| unknown      | NA | NA       | NA       | SJC_S002483 | NA   | NA    | NA | Sjp_0092220.1 | NA                            | NA       |
| HSB10kb_1300 | 6  | 12850254 | 12877688 | SJC_S002484 | 9425 | 31046 | -  | Sjp_0092230.1 | cellular process              | 0.63852  |
| unknown      | NA | NA       | NA       | SJC_S002485 | NA   | NA    | NA | Sjp_0092250.1 | NA                            | NA       |
| unknown      | NA | NA       | NA       | SJC_S002485 | NA   | NA    | NA | Sjp_0092260.1 | NA                            | NA       |
| unknown      | NA | NA       | NA       | SJC_S002486 | NA   | NA    | NA | Sjp_0092270.1 | molecular transducer activity | 0.50162  |
| unknown      | NA | NA       | NA       | SJC_S002487 | NA   | NA    | NA | Sjp_0092280.1 | NA                            | NA       |
| unknown      | NA | NA       | NA       | SJC_S002487 | NA   | NA    | NA | Sjp_0092290.1 | NA                            | NA       |
| unknown      | NA | NA       | NA       | SJC_S002488 | NA   | NA    | NA | Sjp_0092300.1 | NA                            | NA       |
| unknown      | NA | NA       | NA       | SJC_S002488 | NA   | NA    | NA | Sjp_0092310.1 | cell part                     | 0.009037 |
| unknown      | NA | NA       | NA       | SJC_S002489 | NA   | NA    | NA | Sjp_0092320.1 | binding                       | 0.052762 |
| unknown      | NA | NA       | NA       | SJC_S002490 | NA   | NA    | NA | Sjp_0092330.1 | cell part                     | 0.009037 |
| unknown      | NA | NA       | NA       | SJC_S002490 | NA   | NA    | NA | Sjp_0092340.1 | NA                            | NA       |
| unknown      | NA | NA       | NA       | SJC_S002491 | NA   | NA    | NA | Sjp_0092350.1 | NA                            | NA       |
| unknown      | NA | NA       | NA       | SJC_S002491 | NA   | NA    | NA | Sjp_0092360.1 | NA                            | NA       |
| unknown      | NA | NA       | NA       | SJC_S002492 | NA   | NA    | NA | Sjp_0092370.1 | NA                            | NA       |
| unknown      | NA | NA       | NA       | SJC_S002492 | NA   | NA    | NA | Sjp_0092380.1 | transporter activity          | 0.782    |
| HSB10kb_1301 | 1  | 60264740 | 60283214 | SJC_S002493 | 9164 | 22990 | +  | Sjp_0092390.1 | transporter activity          | 0.782    |

|         |    |    |    |             |    |    |    |               |                                                    |          |
|---------|----|----|----|-------------|----|----|----|---------------|----------------------------------------------------|----------|
| unknown | NA | NA | NA | SJC_S002494 | NA | NA | NA | Sjp_0092400.1 | NA                                                 | NA       |
| unknown | NA | NA | NA | SJC_S002498 | NA | NA | NA | Sjp_0092410.1 | NA                                                 | NA       |
| unknown | NA | NA | NA | SJC_S002498 | NA | NA | NA | Sjp_0092420.1 | NA                                                 | NA       |
| unknown | NA | NA | NA | SJC_S002498 | NA | NA | NA | Sjp_0092430.1 | biological regulation                              | 0.76396  |
| unknown | NA | NA | NA | SJC_S002499 | NA | NA | NA | Sjp_0092440.1 | NA                                                 | NA       |
| unknown | NA | NA | NA | SJC_S002499 | NA | NA | NA | Sjp_0092450.1 | NA                                                 | NA       |
| unknown | NA | NA | NA | SJC_S002499 | NA | NA | NA | Sjp_0092460.1 | NA                                                 | NA       |
| unknown | NA | NA | NA | SJC_S002500 | NA | NA | NA | Sjp_0092470.1 | biological regulation                              | 0.76396  |
| unknown | NA | NA | NA | SJC_S002500 | NA | NA | NA | Sjp_0092480.1 | NA                                                 | NA       |
| unknown | NA | NA | NA | SJC_S002503 | NA | NA | NA | Sjp_0092490.1 | NA                                                 | NA       |
| unknown | NA | NA | NA | SJC_S002503 | NA | NA | NA | Sjp_0092500.1 | NA                                                 | NA       |
| unknown | NA | NA | NA | SJC_S002503 | NA | NA | NA | Sjp_0092510.1 | binding                                            | 0.052762 |
| unknown | NA | NA | NA | SJC_S002504 | NA | NA | NA | Sjp_0092520.1 | NA                                                 | NA       |
| unknown | NA | NA | NA | SJC_S002506 | NA | NA | NA | Sjp_0092530.1 | NA                                                 | NA       |
| unknown | NA | NA | NA | SJC_S002508 | NA | NA | NA | Sjp_0092540.1 | catalytic activity                                 | 0.035844 |
| unknown | NA | NA | NA | SJC_S002508 | NA | NA | NA | Sjp_0092550.1 | nucleic acid binding transcription factor activity | NA       |
| unknown | NA | NA | NA | SJC_S002508 | NA | NA | NA | Sjp_0092560.1 | binding                                            | 0.052762 |
| unknown | NA | NA | NA | SJC_S002508 | NA | NA | NA | Sjp_0092570.1 | catalytic activity                                 | 0.035844 |
| unknown | NA | NA | NA | SJC_S002508 | NA | NA | NA | Sjp_0092580.1 | NA                                                 | NA       |
| unknown | NA | NA | NA | SJC_S002509 | NA | NA | NA | Sjp_0092590.1 | biological regulation                              | 0.76396  |
| unknown | NA | NA | NA | SJC_S002510 | NA | NA | NA | Sjp_0092600.1 | transporter activity                               | 0.782    |
| unknown | NA | NA | NA | SJC_S002511 | NA | NA | NA | Sjp_0092610.1 | NA                                                 | NA       |
| unknown | NA | NA | NA | SJC_S002514 | NA | NA | NA | Sjp_0092620.1 | NA                                                 | NA       |
| unknown | NA | NA | NA | SJC_S002515 | NA | NA | NA | Sjp_0092630.1 | NA                                                 | NA       |
| unknown | NA | NA | NA | SJC_S002516 | NA | NA | NA | Sjp_0092640.1 | cell part                                          | 0.009037 |
| unknown | NA | NA | NA | SJC_S002517 | NA | NA | NA | Sjp_0092650.1 | NA                                                 | NA       |
| unknown | NA | NA | NA | SJC_S002518 | NA | NA | NA | Sjp_0092660.1 | NA                                                 | NA       |

|              |    |          |          |             |      |       |    |               |                               |          |
|--------------|----|----------|----------|-------------|------|-------|----|---------------|-------------------------------|----------|
| unknown      | NA | NA       | NA       | SJC_S002518 | NA   | NA    | NA | Sjp_0092670.1 | NA                            | NA       |
| unknown      | NA | NA       | NA       | SJC_S002520 | NA   | NA    | NA | Sjp_0092680.1 | NA                            | NA       |
| unknown      | NA | NA       | NA       | SJC_S002520 | NA   | NA    | NA | Sjp_0092690.1 | NA                            | NA       |
| unknown      | NA | NA       | NA       | SJC_S002520 | NA   | NA    | NA | Sjp_0092700.1 | cell part                     | 0.009037 |
| unknown      | NA | NA       | NA       | SJC_S002520 | NA   | NA    | NA | Sjp_0092710.1 | NA                            | NA       |
| unknown      | NA | NA       | NA       | SJC_S002520 | NA   | NA    | NA | Sjp_0092720.1 | cell part                     | 0.009037 |
| unknown      | NA | NA       | NA       | SJC_S002520 | NA   | NA    | NA | Sjp_0092730.1 | NA                            | NA       |
| HSB10kb_1302 | 1  | 16658447 | 16677868 | SJC_S002521 | 1115 | 18876 | +  | Sjp_0092750.1 | transporter activity          | 0.782    |
| HSB10kb_1302 | 1  | 16658447 | 16677868 | SJC_S002521 | 1115 | 18876 | +  | Sjp_0092760.1 | biological regulation         | 0.76396  |
| HSB10kb_1302 | 1  | 16658447 | 16677868 | SJC_S002521 | 1115 | 18876 | +  | Sjp_0092770.1 | catalytic activity            | 0.035844 |
| unknown      | NA | NA       | NA       | SJC_S002521 | NA   | NA    | NA | Sjp_0092780.1 | NA                            | NA       |
| unknown      | NA | NA       | NA       | SJC_S002521 | NA   | NA    | NA | Sjp_0092790.1 | NA                            | NA       |
| unknown      | NA | NA       | NA       | SJC_S002521 | NA   | NA    | NA | Sjp_0092800.1 | establishment of localization | NA       |
| unknown      | NA | NA       | NA       | SJC_S002522 | NA   | NA    | NA | Sjp_0092810.1 | NA                            | NA       |
| unknown      | NA | NA       | NA       | SJC_S002522 | NA   | NA    | NA | Sjp_0092820.1 | NA                            | NA       |
| unknown      | NA | NA       | NA       | SJC_S002523 | NA   | NA    | NA | Sjp_0092830.1 | NA                            | NA       |
| unknown      | NA | NA       | NA       | SJC_S002524 | NA   | NA    | NA | Sjp_0092840.1 | NA                            | NA       |
| unknown      | NA | NA       | NA       | SJC_S002525 | NA   | NA    | NA | Sjp_0092850.1 | NA                            | NA       |
| unknown      | NA | NA       | NA       | SJC_S002525 | NA   | NA    | NA | Sjp_0092860.1 | biological regulation         | 0.76396  |
| unknown      | NA | NA       | NA       | SJC_S002526 | NA   | NA    | NA | Sjp_0092870.1 | establishment of localization | NA       |
| unknown      | NA | NA       | NA       | SJC_S002526 | NA   | NA    | NA | Sjp_0092880.1 | NA                            | NA       |
| unknown      | NA | NA       | NA       | SJC_S002527 | NA   | NA    | NA | Sjp_0092890.1 | binding                       | 0.052762 |
| unknown      | NA | NA       | NA       | SJC_S002527 | NA   | NA    | NA | Sjp_0092900.1 | NA                            | NA       |
| unknown      | NA | NA       | NA       | SJC_S002527 | NA   | NA    | NA | Sjp_0092910.1 | NA                            | NA       |
| unknown      | NA | NA       | NA       | SJC_S002528 | NA   | NA    | NA | Sjp_0092920.1 | NA                            | NA       |
| unknown      | NA | NA       | NA       | SJC_S002528 | NA   | NA    | NA | Sjp_0092930.1 | response to stimulus          | NA       |
| unknown      | NA | NA       | NA       | SJC_S002528 | NA   | NA    | NA | Sjp_0092940.1 | NA                            | NA       |
| unknown      | NA | NA       | NA       | SJC_S002528 | NA   | NA    | NA | Sjp_0092950.1 | NA                            | NA       |

|              |    |          |          |             |       |        |    |               |                               |          |
|--------------|----|----------|----------|-------------|-------|--------|----|---------------|-------------------------------|----------|
| unknown      | NA | NA       | NA       | SJC_S002529 | NA    | NA     | NA | Sjp_0092960.1 | transporter activity          | 0.782    |
| HSB10kb_1303 | 3  | 10134279 | 10195623 | SJC_S002529 | 14027 | 31523  | -  | Sjp_0092970.1 | transporter activity          | 0.782    |
| HSB10kb_1303 | 3  | 10134279 | 10195623 | SJC_S002529 | 14027 | 31523  | -  | Sjp_0092980.1 | NA                            | NA       |
| unknown      | NA | NA       | NA       | SJC_S002530 | NA    | NA     | NA | Sjp_0092990.1 | NA                            | NA       |
| unknown      | NA | NA       | NA       | SJC_S002530 | NA    | NA     | NA | Sjp_0093000.1 | NA                            | NA       |
| HSB10kb_1304 | 2  | 15235743 | 15384718 | SJC_S002531 | 555   | 115941 | -  | Sjp_0093010.1 | NA                            | NA       |
| HSB10kb_1304 | 2  | 15235743 | 15384718 | SJC_S002531 | 555   | 115941 | -  | Sjp_0093020.1 | NA                            | NA       |
| HSB10kb_1304 | 2  | 15235743 | 15384718 | SJC_S002531 | 555   | 115941 | -  | Sjp_0093030.1 | cell part                     | 0.009037 |
| HSB10kb_1304 | 2  | 15235743 | 15384718 | SJC_S002531 | 555   | 115941 | -  | Sjp_0093040.1 | transporter activity          | 0.782    |
| unknown      | NA | NA       | NA       | SJC_S002531 | NA    | NA     | NA | Sjp_0093050.1 | NA                            | NA       |
| unknown      | NA | NA       | NA       | SJC_S002532 | NA    | NA     | NA | Sjp_0093060.1 | NA                            | NA       |
| unknown      | NA | NA       | NA       | SJC_S002532 | NA    | NA     | NA | Sjp_0093070.1 | catalytic activity            | 0.035844 |
| unknown      | NA | NA       | NA       | SJC_S002534 | NA    | NA     | NA | Sjp_0093080.1 | NA                            | NA       |
| unknown      | NA | NA       | NA       | SJC_S002535 | NA    | NA     | NA | Sjp_0093090.1 | NA                            | NA       |
| unknown      | NA | NA       | NA       | SJC_S002536 | NA    | NA     | NA | Sjp_0093100.1 | biological regulation         | 0.76396  |
| HSB10kb_1305 | 2  | 12782421 | 12820480 | SJC_S002536 | 92566 | 125275 | +  | Sjp_0093110.1 | catalytic activity            | 0.035844 |
| unknown      | NA | NA       | NA       | SJC_S002536 | NA    | NA     | NA | Sjp_0093120.1 | NA                            | NA       |
| unknown      | NA | NA       | NA       | SJC_S002537 | NA    | NA     | NA | Sjp_0093130.1 | biological regulation         | 0.76396  |
| unknown      | NA | NA       | NA       | SJC_S002537 | NA    | NA     | NA | Sjp_0093140.1 | establishment of localization | NA       |
| HSB10kb_1306 | WZ | 4973236  | 4994621  | SJC_S002538 | 951   | 19884  | +  | Sjp_0093150.1 | developmental process         | NA       |
| unknown      | NA | NA       | NA       | SJC_S002539 | NA    | NA     | NA | Sjp_0093160.1 | NA                            | NA       |
| unknown      | NA | NA       | NA       | SJC_S002542 | NA    | NA     | NA | Sjp_0093170.1 | NA                            | NA       |
| unknown      | NA | NA       | NA       | SJC_S002543 | NA    | NA     | NA | Sjp_0093180.1 | NA                            | NA       |
| unknown      | NA | NA       | NA       | SJC_S002543 | NA    | NA     | NA | Sjp_0093190.1 | NA                            | NA       |
| unknown      | NA | NA       | NA       | SJC_S002543 | NA    | NA     | NA | Sjp_0093200.1 | NA                            | NA       |
| unknown      | NA | NA       | NA       | SJC_S002544 | NA    | NA     | NA | Sjp_0093220.1 | NA                            | NA       |
| HSB10kb_1307 | 4  | 29309626 | 29402852 | SJC_S002545 | 10662 | 108330 | -  | Sjp_0093230.1 | cell part                     | 0.009037 |

|              |    |          |          |             |       |        |    |               |                           |          |
|--------------|----|----------|----------|-------------|-------|--------|----|---------------|---------------------------|----------|
| HSB10kb_1307 | 4  | 29309626 | 29402852 | SJC_S002545 | 10662 | 108330 | -  | Sjp_0093240.1 | cell part                 | 0.009037 |
| HSB10kb_1307 | 4  | 29309626 | 29402852 | SJC_S002545 | 10662 | 108330 | -  | Sjp_0093250.1 | NA                        | NA       |
| HSB10kb_1307 | 4  | 29309626 | 29402852 | SJC_S002545 | 10662 | 108330 | -  | Sjp_0093260.1 | binding                   | 0.052762 |
| HSB10kb_1307 | 4  | 29309626 | 29402852 | SJC_S002545 | 10662 | 108330 | -  | Sjp_0093270.1 | metabolic process         | 0.41934  |
| unknown      | NA | NA       | NA       | SJC_S002546 | NA    | NA     | NA | Sjp_0093280.1 | NA                        | NA       |
| unknown      | NA | NA       | NA       | SJC_S002548 | NA    | NA     | NA | Sjp_0093300.1 | NA                        | NA       |
| unknown      | NA | NA       | NA       | SJC_S002549 | NA    | NA     | NA | Sjp_0093310.1 | biological regulation     | 0.76396  |
| unknown      | NA | NA       | NA       | SJC_S002549 | NA    | NA     | NA | Sjp_0093320.1 | cell part                 | 0.009037 |
| unknown      | NA | NA       | NA       | SJC_S002550 | NA    | NA     | NA | Sjp_0093330.1 | NA                        | NA       |
| unknown      | NA | NA       | NA       | SJC_S002550 | NA    | NA     | NA | Sjp_0093340.1 | NA                        | NA       |
| unknown      | NA | NA       | NA       | SJC_S002551 | NA    | NA     | NA | Sjp_0093350.1 | NA                        | NA       |
| unknown      | NA | NA       | NA       | SJC_S002551 | NA    | NA     | NA | Sjp_0093360.1 | NA                        | NA       |
| unknown      | NA | NA       | NA       | SJC_S002551 | NA    | NA     | NA | Sjp_0093370.1 | binding                   | 0.052762 |
| unknown      | NA | NA       | NA       | SJC_S002552 | NA    | NA     | NA | Sjp_0093380.1 | NA                        | NA       |
| unknown      | NA | NA       | NA       | SJC_S002552 | NA    | NA     | NA | Sjp_0093390.1 | catalytic activity        | 0.035844 |
| unknown      | NA | NA       | NA       | SJC_S002552 | NA    | NA     | NA | Sjp_0093400.1 | NA                        | NA       |
| unknown      | NA | NA       | NA       | SJC_S002552 | NA    | NA     | NA | Sjp_0093410.1 | NA                        | NA       |
| unknown      | NA | NA       | NA       | SJC_S002553 | NA    | NA     | NA | Sjp_0093420.1 | NA                        | NA       |
| unknown      | NA | NA       | NA       | SJC_S002554 | NA    | NA     | NA | Sjp_0093430.1 | NA                        | NA       |
| unknown      | NA | NA       | NA       | SJC_S002555 | NA    | NA     | NA | Sjp_0093440.1 | NA                        | NA       |
| unknown      | NA | NA       | NA       | SJC_S002555 | NA    | NA     | NA | Sjp_0093450.1 | NA                        | NA       |
| HSB10kb_1308 | 2  | 14787394 | 14822043 | SJC_S002556 | 15451 | 47521  |    | Sjp_0093460.1 | enzyme regulator activity | 0.1755   |
| HSB10kb_1308 | 2  | 14787394 | 14822043 | SJC_S002556 | 15451 | 47521  |    | Sjp_0093470.1 | enzyme regulator activity | 0.1755   |
| unknown      | NA | NA       | NA       | SJC_S002557 | NA    | NA     | NA | Sjp_0093480.1 | NA                        | NA       |
| unknown      | NA | NA       | NA       | SJC_S002558 | NA    | NA     | NA | Sjp_0093490.1 | NA                        | NA       |
| unknown      | NA | NA       | NA       | SJC_S002558 | NA    | NA     | NA | Sjp_0093500.1 | cell part                 | 0.009037 |
| unknown      | NA | NA       | NA       | SJC_S002559 | NA    | NA     | NA | Sjp_0093510.1 | NA                        | NA       |
| unknown      | NA | NA       | NA       | SJC_S002560 | NA    | NA     | NA | Sjp_0093520.1 | NA                        | NA       |

|              |    |          |          |             |       |       |    |               |                       |          |
|--------------|----|----------|----------|-------------|-------|-------|----|---------------|-----------------------|----------|
| unknown      | NA | NA       | NA       | SJC_S002561 | NA    | NA    | NA | Sjp_0093530.1 | NA                    | NA       |
| unknown      | NA | NA       | NA       | SJC_S002561 | NA    | NA    | NA | Sjp_0093540.1 | NA                    | NA       |
| unknown      | NA | NA       | NA       | SJC_S002562 | NA    | NA    | NA | Sjp_0093550.1 | binding               | 0.052762 |
| HSB10kb_1309 | 1  | 2833257  | 2846311  | SJC_S002562 | 23933 | 34774 | +  | Sjp_0093560.1 | binding               | 0.052762 |
| unknown      | NA | NA       | NA       | SJC_S002563 | NA    | NA    | NA | Sjp_0093570.1 | biological regulation | 0.76396  |
| unknown      | NA | NA       | NA       | SJC_S002563 | NA    | NA    | NA | Sjp_0093580.1 | NA                    | NA       |
| unknown      | NA | NA       | NA       | SJC_S002564 | NA    | NA    | NA | Sjp_0093590.1 | NA                    | NA       |
| unknown      | NA | NA       | NA       | SJC_S002565 | NA    | NA    | NA | Sjp_0093600.1 | NA                    | NA       |
| unknown      | NA | NA       | NA       | SJC_S002566 | NA    | NA    | NA | Sjp_0093610.1 | NA                    | NA       |
| unknown      | NA | NA       | NA       | SJC_S002567 | NA    | NA    | NA | Sjp_0093620.1 | NA                    | NA       |
| HSB10kb_1310 | 2  | 27208829 | 27226031 | SJC_S002567 | 30703 | 43384 | +  | Sjp_0093630.1 | catalytic activity    | 0.035844 |
| unknown      | NA | NA       | NA       | SJC_S002568 | NA    | NA    | NA | Sjp_0093640.1 | transporter activity  | 0.782    |
| HSB10kb_1311 | 6  | 18464173 | 18483424 | SJC_S002569 | 1     | 25117 | +  | Sjp_0093650.1 | NA                    | NA       |
| unknown      | NA | NA       | NA       | SJC_S002569 | NA    | NA    | NA | Sjp_0093660.1 | NA                    | NA       |
| HSB10kb_1312 | WZ | 40378686 | 40395815 | SJC_S002570 | 3335  | 19187 | +  | Sjp_0093670.1 | catalytic activity    | 0.035844 |
| HSB10kb_1312 | WZ | 40378686 | 40395815 | SJC_S002570 | 3335  | 19187 | +  | Sjp_0093680.1 | NA                    | NA       |
| unknown      | NA | NA       | NA       | SJC_S002571 | NA    | NA    | NA | Sjp_0093690.1 | NA                    | NA       |
| unknown      | NA | NA       | NA       | SJC_S002572 | NA    | NA    | NA | Sjp_0093720.1 | NA                    | NA       |
| unknown      | NA | NA       | NA       | SJC_S002573 | NA    | NA    | NA | Sjp_0093730.1 | biological regulation | 0.76396  |
| unknown      | NA | NA       | NA       | SJC_S002573 | NA    | NA    | NA | Sjp_0093740.1 | biological regulation | 0.76396  |
| unknown      | NA | NA       | NA       | SJC_S002575 | NA    | NA    | NA | Sjp_0093750.1 | NA                    | NA       |
| unknown      | NA | NA       | NA       | SJC_S002578 | NA    | NA    | NA | Sjp_0093760.1 | NA                    | NA       |
| unknown      | NA | NA       | NA       | SJC_S002579 | NA    | NA    | NA | Sjp_0093770.1 | cell part             | 0.009037 |
| unknown      | NA | NA       | NA       | SJC_S002580 | NA    | NA    | NA | Sjp_0093780.1 | NA                    | NA       |
| unknown      | NA | NA       | NA       | SJC_S002581 | NA    | NA    | NA | Sjp_0093790.1 | NA                    | NA       |
| unknown      | NA | NA       | NA       | SJC_S002581 | NA    | NA    | NA | Sjp_0093800.1 | NA                    | NA       |
| unknown      | NA | NA       | NA       | SJC_S002582 | NA    | NA    | NA | Sjp_0093810.1 | NA                    | NA       |
| unknown      | NA | NA       | NA       | SJC_S002583 | NA    | NA    | NA | Sjp_0093820.1 | NA                    | NA       |
| unknown      | NA | NA       | NA       | SJC_S002584 | NA    | NA    | NA | Sjp_0093830.1 | cellular process      | 0.63852  |
| unknown      | NA | NA       | NA       | SJC_S002584 | NA    | NA    | NA | Sjp_0093840.1 | NA                    | NA       |



|              |    |          |          |             |       |       |    |               |                                               |          |
|--------------|----|----------|----------|-------------|-------|-------|----|---------------|-----------------------------------------------|----------|
| unknown      | NA | NA       | NA       | SJC_S002584 | NA    | NA    | NA | Sjp_0093850.1 | cellular process                              | 0.63852  |
| unknown      | NA | NA       | NA       | SJC_S002584 | NA    | NA    | NA | Sjp_0093860.1 | NA                                            | NA       |
| unknown      | NA | NA       | NA       | SJC_S002585 | NA    | NA    | NA | Sjp_0093870.1 | catalytic activity                            | 0.035844 |
| unknown      | NA | NA       | NA       | SJC_S002586 | NA    | NA    | NA | Sjp_0093880.1 | catalytic activity                            | 0.035844 |
| unknown      | NA | NA       | NA       | SJC_S002588 | NA    | NA    | NA | Sjp_0093890.1 | catalytic activity                            | 0.035844 |
| unknown      | NA | NA       | NA       | SJC_S002589 | NA    | NA    | NA | Sjp_0093900.1 | NA                                            | NA       |
| unknown      | NA | NA       | NA       | SJC_S002590 | NA    | NA    | NA | Sjp_0093910.1 | NA                                            | NA       |
| unknown      | NA | NA       | NA       | SJC_S002590 | NA    | NA    | NA | Sjp_0093920.1 | NA                                            | NA       |
| unknown      | NA | NA       | NA       | SJC_S002591 | NA    | NA    | NA | Sjp_0093930.1 | binding                                       | 0.052762 |
| HSB10kb_1313 | WZ | 35515574 | 35527256 | SJC_S002592 | 7440  | 18493 | -  | Sjp_0093940.1 | transporter activity                          | 0.782    |
| unknown      | NA | NA       | NA       | SJC_S002593 | NA    | NA    | NA | Sjp_0093950.1 | NA                                            | NA       |
| unknown      | NA | NA       | NA       | SJC_S002594 | NA    | NA    | NA | Sjp_0093960.1 | binding                                       | 0.052762 |
| unknown      | NA | NA       | NA       | SJC_S002594 | NA    | NA    | NA | Sjp_0093970.1 | NA                                            | NA       |
| unknown      | NA | NA       | NA       | SJC_S002596 | NA    | NA    | NA | Sjp_0093980.1 | NA                                            | NA       |
| HSB10kb_1314 | WZ | 11809938 | 11839806 | SJC_S002597 | 23469 | 47161 | -  | Sjp_0093990.1 | NA                                            | NA       |
| unknown      | NA | NA       | NA       | SJC_S002598 | NA    | NA    | NA | Sjp_0094000.1 | NA                                            | NA       |
| unknown      | NA | NA       | NA       | SJC_S002599 | NA    | NA    | NA | Sjp_0094010.1 | NA                                            | NA       |
| HSB10kb_1315 | 1  | 22868158 | 22904224 | SJC_S002600 | 759   | 54262 | -  | Sjp_0094020.1 | NA                                            | NA       |
| HSB10kb_1315 | 1  | 22868158 | 22904224 | SJC_S002600 | 759   | 54262 | -  | Sjp_0094030.1 | cellular process                              | 0.63852  |
| HSB10kb_1315 | 1  | 22868158 | 22904224 | SJC_S002600 | 759   | 54262 | -  | Sjp_0094040.1 | protein binding transcription factor activity | NA       |
| HSB10kb_1315 | 1  | 22868158 | 22904224 | SJC_S002600 | 759   | 54262 | -  | Sjp_0094050.1 | NA                                            | NA       |
| unknown      | NA | NA       | NA       | SJC_S002601 | NA    | NA    | NA | Sjp_0094060.1 | binding                                       | 0.052762 |
| unknown      | NA | NA       | NA       | SJC_S002602 | NA    | NA    | NA | Sjp_0094070.1 | cell part                                     | 0.009037 |
| unknown      | NA | NA       | NA       | SJC_S002602 | NA    | NA    | NA | Sjp_0094080.1 | NA                                            | NA       |
| unknown      | NA | NA       | NA       | SJC_S002604 | NA    | NA    | NA | Sjp_0094090.1 | NA                                            | NA       |
| unknown      | NA | NA       | NA       | SJC_S002605 | NA    | NA    | NA | Sjp_0094100.1 | NA                                            | NA       |
| unknown      | NA | NA       | NA       | SJC_S002605 | NA    | NA    | NA | Sjp_0094110.1 | NA                                            | NA       |
| unknown      | NA | NA       | NA       | SJC_S002606 | NA    | NA    | NA | Sjp_0094120.1 | catalytic activity                            | 0.035844 |
| unknown      | NA | NA       | NA       | SJC_S002608 | NA    | NA    | NA | Sjp_0094130.1 | NA                                            | NA       |
| unknown      | NA | NA       | NA       | SJC_S002610 | NA    | NA    | NA | Sjp_0094140.1 | NA                                            | NA       |
| unknown      | NA | NA       | NA       | SJC_S002611 | NA    | NA    | NA | Sjp_0094150.1 | NA                                            | NA       |

|              |    |          |          |             |       |       |    |               |                                               |          |
|--------------|----|----------|----------|-------------|-------|-------|----|---------------|-----------------------------------------------|----------|
| HSB10kb_1316 | 2  | 20334707 | 20352406 | SJC_S002611 | 18064 | 33614 | -  | Sjp_0094160.1 | cell part                                     | 0.009037 |
| unknown      | NA | NA       | NA       | SJC_S002612 | NA    | NA    | NA | Sjp_0094170.1 | NA                                            | NA       |
| unknown      | NA | NA       | NA       | SJC_S002612 | NA    | NA    | NA | Sjp_0094180.1 | biological regulation                         | 0.76396  |
| unknown      | NA | NA       | NA       | SJC_S002613 | NA    | NA    | NA | Sjp_0094190.1 | NA                                            | NA       |
| unknown      | NA | NA       | NA       | SJC_S002614 | NA    | NA    | NA | Sjp_0094200.1 | NA                                            | NA       |
| unknown      | NA | NA       | NA       | SJC_S002616 | NA    | NA    | NA | Sjp_0094210.1 | catalytic activity                            | 0.035844 |
| unknown      | NA | NA       | NA       | SJC_S002618 | NA    | NA    | NA | Sjp_0094220.1 | catalytic activity                            | 0.035844 |
| unknown      | NA | NA       | NA       | SJC_S002619 | NA    | NA    | NA | Sjp_0094230.1 | NA                                            | NA       |
| unknown      | NA | NA       | NA       | SJC_S002619 | NA    | NA    | NA | Sjp_0094240.1 | NA                                            | NA       |
| unknown      | NA | NA       | NA       | SJC_S002619 | NA    | NA    | NA | Sjp_0094250.1 | NA                                            | NA       |
| unknown      | NA | NA       | NA       | SJC_S002619 | NA    | NA    | NA | Sjp_0094260.1 | NA                                            | NA       |
| unknown      | NA | NA       | NA       | SJC_S002622 | NA    | NA    | NA | Sjp_0094270.1 | NA                                            | NA       |
| unknown      | NA | NA       | NA       | SJC_S002622 | NA    | NA    | NA | Sjp_0094280.1 | metabolic process                             | 0.41934  |
| unknown      | NA | NA       | NA       | SJC_S002623 | NA    | NA    | NA | Sjp_0094290.1 | NA                                            | NA       |
| unknown      | NA | NA       | NA       | SJC_S002625 | NA    | NA    | NA | Sjp_0094300.1 | NA                                            | NA       |
| unknown      | NA | NA       | NA       | SJC_S002626 | NA    | NA    | NA | Sjp_0094310.1 | biological regulation                         | 0.76396  |
| unknown      | NA | NA       | NA       | SJC_S002626 | NA    | NA    | NA | Sjp_0094320.1 | NA                                            | NA       |
| unknown      | NA | NA       | NA       | SJC_S002626 | NA    | NA    | NA | Sjp_0094330.1 | NA                                            | NA       |
| unknown      | NA | NA       | NA       | SJC_S002626 | NA    | NA    | NA | Sjp_0094340.1 | NA                                            | NA       |
| HSB10kb_1317 | 4  | 1427674  | 1449525  | SJC_S002629 | 6145  | 25469 | +  | Sjp_0094350.1 | NA                                            | NA       |
| HSB10kb_1318 | 1  | 50815524 | 50851479 | SJC_S002630 | 335   | 33631 | +  | Sjp_0094360.1 | cellular component organization or biogenesis | NA       |
| unknown      | NA | NA       | NA       | SJC_S002631 | NA    | NA    | NA | Sjp_0094370.1 | response to stimulus                          | NA       |
| unknown      | NA | NA       | NA       | SJC_S002632 | NA    | NA    | NA | Sjp_0094380.1 | NA                                            | NA       |
| HSB10kb_1319 | 2  | 33141204 | 33159235 | SJC_S002632 | 12059 | 29683 | -  | Sjp_0094390.1 | NA                                            | NA       |
| unknown      | NA | NA       | NA       | SJC_S002634 | NA    | NA    | NA | Sjp_0094400.1 | cellular component organization or biogenesis | NA       |

|              |    |          |          |             |       |       |    |               |                               |          |
|--------------|----|----------|----------|-------------|-------|-------|----|---------------|-------------------------------|----------|
| HSB10kb_1320 | 3  | 14352243 | 14376959 | SJC_S002634 | 20715 | 32974 | -  | Sjp_0094410.1 | biological regulation         | 0.76396  |
| HSB10kb_1320 | 3  | 14352243 | 14376959 | SJC_S002634 | 20715 | 32974 | -  | Sjp_0094420.1 | NA                            | NA       |
| HSB10kb_1321 | 1  | 20860398 | 20876820 | SJC_S002636 | 6873  | 18815 | +  | Sjp_0094440.1 | molecular transducer activity | 0.50162  |
| unknown      | NA | NA       | NA       | SJC_S002636 | NA    | NA    | NA | Sjp_0094450.1 | metabolic process             | 0.41934  |
| unknown      | NA | NA       | NA       | SJC_S002637 | NA    | NA    | NA | Sjp_0094460.1 | NA                            | NA       |
| unknown      | NA | NA       | NA       | SJC_S002639 | NA    | NA    | NA | Sjp_0094470.1 | binding                       | 0.052762 |
| unknown      | NA | NA       | NA       | SJC_S002640 | NA    | NA    | NA | Sjp_0094480.1 | NA                            | NA       |
| unknown      | NA | NA       | NA       | SJC_S002643 | NA    | NA    | NA | Sjp_0094490.1 | NA                            | NA       |
| unknown      | NA | NA       | NA       | SJC_S002644 | NA    | NA    | NA | Sjp_0094500.1 | binding                       | 0.052762 |
| unknown      | NA | NA       | NA       | SJC_S002645 | NA    | NA    | NA | Sjp_0094510.1 | NA                            | NA       |
| unknown      | NA | NA       | NA       | SJC_S002645 | NA    | NA    | NA | Sjp_0094520.1 | NA                            | NA       |
| unknown      | NA | NA       | NA       | SJC_S002645 | NA    | NA    | NA | Sjp_0094530.1 | NA                            | NA       |
| unknown      | NA | NA       | NA       | SJC_S002646 | NA    | NA    | NA | Sjp_0094540.1 | enzyme regulator activity     | 0.1755   |
| unknown      | NA | NA       | NA       | SJC_S002652 | NA    | NA    | NA | Sjp_0094550.1 | NA                            | NA       |
| unknown      | NA | NA       | NA       | SJC_S002652 | NA    | NA    | NA | Sjp_0094560.1 | NA                            | NA       |
| unknown      | NA | NA       | NA       | SJC_S002657 | NA    | NA    | NA | Sjp_0094570.1 | biological regulation         | 0.76396  |
| unknown      | NA | NA       | NA       | SJC_S002657 | NA    | NA    | NA | Sjp_0094580.1 | NA                            | NA       |
| unknown      | NA | NA       | NA       | SJC_S002658 | NA    | NA    | NA | Sjp_0094590.1 | NA                            | NA       |
| unknown      | NA | NA       | NA       | SJC_S002659 | NA    | NA    | NA | Sjp_0094600.1 | NA                            | NA       |
| unknown      | NA | NA       | NA       | SJC_S002660 | NA    | NA    | NA | Sjp_0094610.1 | NA                            | NA       |
| unknown      | NA | NA       | NA       | SJC_S002662 | NA    | NA    | NA | Sjp_0094620.1 | NA                            | NA       |
| unknown      | NA | NA       | NA       | SJC_S002665 | NA    | NA    | NA | Sjp_0094630.1 | biological regulation         | 0.76396  |
| unknown      | NA | NA       | NA       | SJC_S002667 | NA    | NA    | NA | Sjp_0094640.1 | NA                            | NA       |
| unknown      | NA | NA       | NA       | SJC_S002669 | NA    | NA    | NA | Sjp_0094650.1 | NA                            | NA       |
| unknown      | NA | NA       | NA       | SJC_S002669 | NA    | NA    | NA | Sjp_0094660.1 | catalytic activity            | 0.035844 |
| unknown      | NA | NA       | NA       | SJC_S002670 | NA    | NA    | NA | Sjp_0094670.1 | catalytic activity            | 0.035844 |

|              |    |          |          |             |       |       |    |               |                                  |          |
|--------------|----|----------|----------|-------------|-------|-------|----|---------------|----------------------------------|----------|
| HSB10kb_1322 | WZ | 57914017 | 57944623 | SJC_S002671 | 3766  | 35220 | +  | Sjp_0094680.1 | NA                               | NA       |
| HSB10kb_1322 | WZ | 57914017 | 57944623 | SJC_S002671 | 3766  | 35220 | +  | Sjp_0094690.1 | NA                               | NA       |
| unknown      | NA | NA       | NA       | SJC_S002672 | NA    | NA    | NA | Sjp_0094700.1 | NA                               | NA       |
| unknown      | NA | NA       | NA       | SJC_S002673 | NA    | NA    | NA | Sjp_0094710.1 | molecular transducer activity    | 0.50162  |
| unknown      | NA | NA       | NA       | SJC_S002677 | NA    | NA    | NA | Sjp_0094720.1 | enzyme regulator activity        | 0.1755   |
| unknown      | NA | NA       | NA       | SJC_S002678 | NA    | NA    | NA | Sjp_0094730.1 | NA                               | NA       |
| unknown      | NA | NA       | NA       | SJC_S002678 | NA    | NA    | NA | Sjp_0094740.1 | transporter activity             | 0.782    |
| unknown      | NA | NA       | NA       | SJC_S002679 | NA    | NA    | NA | Sjp_0094750.1 | catalytic activity               | 0.035844 |
| HSB10kb_1323 | WZ | 35920599 | 35940751 | SJC_S002680 | 10464 | 33999 | -  | Sjp_0094760.1 | NA                               | NA       |
| unknown      | NA | NA       | NA       | SJC_S002681 | NA    | NA    | NA | Sjp_0094770.1 | NA                               | NA       |
| unknown      | NA | NA       | NA       | SJC_S002683 | NA    | NA    | NA | Sjp_0094780.1 | NA                               | NA       |
| unknown      | NA | NA       | NA       | SJC_S002685 | NA    | NA    | NA | Sjp_0094790.1 | NA                               | NA       |
| unknown      | NA | NA       | NA       | SJC_S002686 | NA    | NA    | NA | Sjp_0094800.1 | NA                               | NA       |
| unknown      | NA | NA       | NA       | SJC_S002687 | NA    | NA    | NA | Sjp_0094810.1 | NA                               | NA       |
| unknown      | NA | NA       | NA       | SJC_S002687 | NA    | NA    | NA | Sjp_0094830.1 | molecular transducer activity    | 0.50162  |
| unknown      | NA | NA       | NA       | SJC_S002688 | NA    | NA    | NA | Sjp_0094840.1 | NA                               | NA       |
| unknown      | NA | NA       | NA       | SJC_S002689 | NA    | NA    | NA | Sjp_0094850.1 | NA                               | NA       |
| unknown      | NA | NA       | NA       | SJC_S002689 | NA    | NA    | NA | Sjp_0094860.1 | NA                               | NA       |
| unknown      | NA | NA       | NA       | SJC_S002690 | NA    | NA    | NA | Sjp_0094870.1 | transcription regulator activity | NA       |
| unknown      | NA | NA       | NA       | SJC_S002690 | NA    | NA    | NA | Sjp_0094880.1 | NA                               | NA       |
| unknown      | NA | NA       | NA       | SJC_S002690 | NA    | NA    | NA | Sjp_0094890.1 | transcription regulator activity | NA       |
| unknown      | NA | NA       | NA       | SJC_S002691 | NA    | NA    | NA | Sjp_0094900.1 | NA                               | NA       |
| unknown      | NA | NA       | NA       | SJC_S002692 | NA    | NA    | NA | Sjp_0094910.1 | NA                               | NA       |
| unknown      | NA | NA       | NA       | SJC_S002693 | NA    | NA    | NA | Sjp_0094920.1 | NA                               | NA       |

|         |    |    |    |             |    |    |    |               |                               |          |
|---------|----|----|----|-------------|----|----|----|---------------|-------------------------------|----------|
| unknown | NA | NA | NA | SJC_S002695 | NA | NA | NA | Sjp_0094930.1 | catalytic activity            | 0.035844 |
| unknown | NA | NA | NA | SJC_S002696 | NA | NA | NA | Sjp_0094940.1 | catalytic activity            | 0.035844 |
| unknown | NA | NA | NA | SJC_S002699 | NA | NA | NA | Sjp_0094960.1 | cellular process              | 0.63852  |
| unknown | NA | NA | NA | SJC_S002702 | NA | NA | NA | Sjp_0094970.1 | NA                            | NA       |
| unknown | NA | NA | NA | SJC_S002706 | NA | NA | NA | Sjp_0094980.1 | NA                            | NA       |
| unknown | NA | NA | NA | SJC_S002709 | NA | NA | NA | Sjp_0094990.1 | NA                            | NA       |
| unknown | NA | NA | NA | SJC_S002711 | NA | NA | NA | Sjp_0095000.1 | metabolic process             | 0.41934  |
| unknown | NA | NA | NA | SJC_S002712 | NA | NA | NA | Sjp_0095010.1 | transporter activity          | 0.782    |
| unknown | NA | NA | NA | SJC_S002713 | NA | NA | NA | Sjp_0095020.1 | transporter activity          | 0.782    |
| unknown | NA | NA | NA | SJC_S002714 | NA | NA | NA | Sjp_0095030.1 | NA                            | NA       |
| unknown | NA | NA | NA | SJC_S002715 | NA | NA | NA | Sjp_0095040.1 | NA                            | NA       |
| unknown | NA | NA | NA | SJC_S002716 | NA | NA | NA | Sjp_0095050.1 | reproductive process          | NA       |
| unknown | NA | NA | NA | SJC_S002721 | NA | NA | NA | Sjp_0095060.1 | cell part                     | 0.009037 |
| unknown | NA | NA | NA | SJC_S002722 | NA | NA | NA | Sjp_0095070.1 | biological regulation         | 0.76396  |
| unknown | NA | NA | NA | SJC_S002723 | NA | NA | NA | Sjp_0095080.1 | transporter activity          | 0.782    |
| unknown | NA | NA | NA | SJC_S002724 | NA | NA | NA | Sjp_0095090.1 | NA                            | NA       |
| unknown | NA | NA | NA | SJC_S002725 | NA | NA | NA | Sjp_0095100.1 | NA                            | NA       |
| unknown | NA | NA | NA | SJC_S002726 | NA | NA | NA | Sjp_0095110.1 | catalytic activity            | 0.035844 |
| unknown | NA | NA | NA | SJC_S002727 | NA | NA | NA | Sjp_0095120.1 | NA                            | NA       |
| unknown | NA | NA | NA | SJC_S002727 | NA | NA | NA | Sjp_0095130.1 | NA                            | NA       |
| unknown | NA | NA | NA | SJC_S002730 | NA | NA | NA | Sjp_0095140.1 | NA                            | NA       |
| unknown | NA | NA | NA | SJC_S002731 | NA | NA | NA | Sjp_0095150.1 | transporter activity          | 0.782    |
| unknown | NA | NA | NA | SJC_S002732 | NA | NA | NA | Sjp_0095160.1 | establishment of localization | NA       |
| unknown | NA | NA | NA | SJC_S002733 | NA | NA | NA | Sjp_0095170.1 | NA                            | NA       |
| unknown | NA | NA | NA | SJC_S002734 | NA | NA | NA | Sjp_0095180.1 | biological regulation         | 0.76396  |

|              |    |          |          |             |      |       |    |               |                                  |          |
|--------------|----|----------|----------|-------------|------|-------|----|---------------|----------------------------------|----------|
| unknown      | NA | NA       | NA       | SJC_S002735 | NA   | NA    | NA | Sjp_0095190.1 | NA                               | NA       |
| HSB10kb_1324 | 3  | 6981852  | 7000737  | SJC_S002736 | 1724 | 18439 | +  | Sjp_0095200.1 | catalytic activity               | 0.035844 |
| unknown      | NA | NA       | NA       | SJC_S002737 | NA   | NA    | NA | Sjp_0095210.1 | NA                               | NA       |
| unknown      | NA | NA       | NA       | SJC_S002739 | NA   | NA    | NA | Sjp_0095220.1 | cellular process                 | 0.63852  |
| unknown      | NA | NA       | NA       | SJC_S002740 | NA   | NA    | NA | Sjp_0095230.1 | NA                               | NA       |
| unknown      | NA | NA       | NA       | SJC_S002742 | NA   | NA    | NA | Sjp_0095240.1 | biological regulation            | 0.76396  |
| unknown      | NA | NA       | NA       | SJC_S002743 | NA   | NA    | NA | Sjp_0095250.1 | NA                               | NA       |
| unknown      | NA | NA       | NA       | SJC_S002744 | NA   | NA    | NA | Sjp_0095260.1 | NA                               | NA       |
| unknown      | NA | NA       | NA       | SJC_S002744 | NA   | NA    | NA | Sjp_0095270.1 | cellular process                 | 0.63852  |
| unknown      | NA | NA       | NA       | SJC_S002747 | NA   | NA    | NA | Sjp_0095290.1 | NA                               | NA       |
| unknown      | NA | NA       | NA       | SJC_S002748 | NA   | NA    | NA | Sjp_0095300.1 | NA                               | NA       |
| unknown      | NA | NA       | NA       | SJC_S002750 | NA   | NA    | NA | Sjp_0095310.1 | NA                               | NA       |
| unknown      | NA | NA       | NA       | SJC_S002752 | NA   | NA    | NA | Sjp_0095320.1 | cell part                        | 0.009037 |
| unknown      | NA | NA       | NA       | SJC_S002753 | NA   | NA    | NA | Sjp_0095330.1 | NA                               | NA       |
| unknown      | NA | NA       | NA       | SJC_S002754 | NA   | NA    | NA | Sjp_0095340.1 | NA                               | NA       |
| unknown      | NA | NA       | NA       | SJC_S002755 | NA   | NA    | NA | Sjp_0095350.1 | NA                               | NA       |
| unknown      | NA | NA       | NA       | SJC_S002756 | NA   | NA    | NA | Sjp_0095360.1 | multicellular organismal process | NA       |
| unknown      | NA | NA       | NA       | SJC_S002756 | NA   | NA    | NA | Sjp_0095370.1 | transporter activity             | 0.782    |
| HSB10kb_1325 | 3  | 3258566  | 3299077  | SJC_S002758 | 1265 | 33030 | +  | Sjp_0095380.1 | NA                               | NA       |
| HSB10kb_1325 | 3  | 3258566  | 3299077  | SJC_S002758 | 1265 | 33030 | +  | Sjp_0095390.1 | biological regulation            | 0.76396  |
| HSB10kb_1325 | 3  | 3258566  | 3299077  | SJC_S002758 | 1265 | 33030 | +  | Sjp_0095400.1 | NA                               | NA       |
| HSB10kb_1326 | 4  | 8417084  | 8440623  | SJC_S002759 | 4487 | 20943 | -  | Sjp_0095410.1 | biological regulation            | 0.76396  |
| HSB10kb_1327 | 4  | 18461442 | 18488578 | SJC_S002760 | 955  | 25067 |    | Sjp_0095420.1 | NA                               | NA       |
| unknown      | NA | NA       | NA       | SJC_S002762 | NA   | NA    | NA | Sjp_0095430.1 | NA                               | NA       |
| unknown      | NA | NA       | NA       | SJC_S002763 | NA   | NA    | NA | Sjp_0095440.1 | NA                               | NA       |
| unknown      | NA | NA       | NA       | SJC_S002765 | NA   | NA    | NA | Sjp_0095450.1 | transporter activity             | 0.782    |
| unknown      | NA | NA       | NA       | SJC_S002766 | NA   | NA    | NA | Sjp_0095460.1 | NA                               | NA       |

|         |    |    |    |             |    |    |    |               |                       |          |
|---------|----|----|----|-------------|----|----|----|---------------|-----------------------|----------|
| unknown | NA | NA | NA | SJC_S002767 | NA | NA | NA | Sjp_0095470.1 | biological regulation | 0.76396  |
| unknown | NA | NA | NA | SJC_S002770 | NA | NA | NA | Sjp_0095490.1 | NA                    | NA       |
| unknown | NA | NA | NA | SJC_S002774 | NA | NA | NA | Sjp_0095500.1 | NA                    | NA       |
| unknown | NA | NA | NA | SJC_S002778 | NA | NA | NA | Sjp_0095510.1 | catalytic activity    | 0.035844 |
| unknown | NA | NA | NA | SJC_S002780 | NA | NA | NA | Sjp_0095520.1 | NA                    | NA       |
| unknown | NA | NA | NA | SJC_S002782 | NA | NA | NA | Sjp_0095530.1 | catalytic activity    | 0.035844 |
| unknown | NA | NA | NA | SJC_S002786 | NA | NA | NA | Sjp_0095540.1 | NA                    | NA       |
| unknown | NA | NA | NA | SJC_S002789 | NA | NA | NA | Sjp_0095550.1 | NA                    | NA       |
| unknown | NA | NA | NA | SJC_S002792 | NA | NA | NA | Sjp_0095560.1 | catalytic activity    | 0.035844 |
| unknown | NA | NA | NA | SJC_S002795 | NA | NA | NA | Sjp_0095570.1 | NA                    | NA       |
| unknown | NA | NA | NA | SJC_S002796 | NA | NA | NA | Sjp_0095580.1 | cell part             | 0.009037 |
| unknown | NA | NA | NA | SJC_S002805 | NA | NA | NA | Sjp_0095600.1 | NA                    | NA       |
| unknown | NA | NA | NA | SJC_S002806 | NA | NA | NA | Sjp_0095610.1 | NA                    | NA       |
| unknown | NA | NA | NA | SJC_S002807 | NA | NA | NA | Sjp_0095620.1 | NA                    | NA       |
| unknown | NA | NA | NA | SJC_S002808 | NA | NA | NA | Sjp_0095630.1 | binding               | 0.052762 |
| unknown | NA | NA | NA | SJC_S002812 | NA | NA | NA | Sjp_0095640.1 | metabolic process     | 0.41934  |
| unknown | NA | NA | NA | SJC_S002814 | NA | NA | NA | Sjp_0095650.1 | cellular process      | 0.63852  |
| unknown | NA | NA | NA | SJC_S002815 | NA | NA | NA | Sjp_0095660.1 | NA                    | NA       |
| unknown | NA | NA | NA | SJC_S002818 | NA | NA | NA | Sjp_0095670.1 | NA                    | NA       |
| unknown | NA | NA | NA | SJC_S002820 | NA | NA | NA | Sjp_0095680.1 | NA                    | NA       |
| unknown | NA | NA | NA | SJC_S002823 | NA | NA | NA | Sjp_0095690.1 | biological regulation | 0.76396  |
| unknown | NA | NA | NA | SJC_S002824 | NA | NA | NA | Sjp_0095700.1 | NA                    | NA       |
| unknown | NA | NA | NA | SJC_S002824 | NA | NA | NA | Sjp_0095710.1 | NA                    | NA       |
| unknown | NA | NA | NA | SJC_S002826 | NA | NA | NA | Sjp_0095720.1 | cell part             | 0.009037 |
| unknown | NA | NA | NA | SJC_S002827 | NA | NA | NA | Sjp_0095730.1 | NA                    | NA       |
| unknown | NA | NA | NA | SJC_S002828 | NA | NA | NA | Sjp_0095740.1 | NA                    | NA       |
| unknown | NA | NA | NA | SJC_S002830 | NA | NA | NA | Sjp_0095750.1 | developmental process | NA       |
| unknown | NA | NA | NA | SJC_S002833 | NA | NA | NA | Sjp_0095760.1 | NA                    | NA       |
| unknown | NA | NA | NA | SJC_S002838 | NA | NA | NA | Sjp_0095780.1 | NA                    | NA       |
| unknown | NA | NA | NA | SJC_S002839 | NA | NA | NA | Sjp_0095790.1 | NA                    | NA       |

|              |    |          |          |             |       |       |    |               |                    |          |
|--------------|----|----------|----------|-------------|-------|-------|----|---------------|--------------------|----------|
| unknown      | NA | NA       | NA       | SJC_S002840 | NA    | NA    | NA | Sjp_0095800.1 | NA                 | NA       |
| unknown      | NA | NA       | NA       | SJC_S002841 | NA    | NA    | NA | Sjp_0095810.1 | NA                 | NA       |
| unknown      | NA | NA       | NA       | SJC_S002843 | NA    | NA    | NA | Sjp_0095820.1 | NA                 | NA       |
| unknown      | NA | NA       | NA       | SJC_S002844 | NA    | NA    | NA | Sjp_0095830.1 | NA                 | NA       |
| unknown      | NA | NA       | NA       | SJC_S002846 | NA    | NA    | NA | Sjp_0095840.1 | NA                 | NA       |
| unknown      | NA | NA       | NA       | SJC_S002847 | NA    | NA    | NA | Sjp_0095850.1 | binding            | 0.052762 |
| unknown      | NA | NA       | NA       | SJC_S002850 | NA    | NA    | NA | Sjp_0095860.1 | NA                 | NA       |
| unknown      | NA | NA       | NA       | SJC_S002853 | NA    | NA    | NA | Sjp_0095870.1 | NA                 | NA       |
| unknown      | NA | NA       | NA       | SJC_S002855 | NA    | NA    | NA | Sjp_0095880.1 | NA                 | NA       |
| unknown      | NA | NA       | NA       | SJC_S002855 | NA    | NA    | NA | Sjp_0095890.1 | NA                 | NA       |
| unknown      | NA | NA       | NA       | SJC_S002856 | NA    | NA    | NA | Sjp_0095900.1 | NA                 | NA       |
| HSB10kb_1328 | 3  | 10677361 | 10691744 | SJC_S002857 | 13480 | 25334 | -  | NA            | NA                 | NA       |
| unknown      | NA | NA       | NA       | SJC_S002858 | NA    | NA    | NA | Sjp_0095910.1 | NA                 | NA       |
| HSB10kb_1329 | WZ | 49991826 | 50026043 | SJC_S002858 | 9541  | 40512 | -  | Sjp_0095920.1 | NA                 | NA       |
| HSB10kb_1329 | WZ | 49991826 | 50026043 | SJC_S002858 | 9541  | 40512 | -  | Sjp_0095930.1 | NA                 | NA       |
| HSB10kb_1329 | WZ | 49991826 | 50026043 | SJC_S002858 | 9541  | 40512 | -  | Sjp_0095940.1 | NA                 | NA       |
| unknown      | NA | NA       | NA       | SJC_S002860 | NA    | NA    | NA | Sjp_0095950.1 | NA                 | NA       |
| unknown      | NA | NA       | NA       | SJC_S002861 | NA    | NA    | NA | Sjp_0095960.1 | NA                 | NA       |
| unknown      | NA | NA       | NA       | SJC_S002861 | NA    | NA    | NA | Sjp_0095970.1 | catalytic activity | 0.035844 |
| unknown      | NA | NA       | NA       | SJC_S002862 | NA    | NA    | NA | Sjp_0095980.1 | NA                 | NA       |
| unknown      | NA | NA       | NA       | SJC_S002862 | NA    | NA    | NA | Sjp_0095990.1 | NA                 | NA       |
| unknown      | NA | NA       | NA       | SJC_S002863 | NA    | NA    | NA | Sjp_0096010.1 | NA                 | NA       |
| unknown      | NA | NA       | NA       | SJC_S002863 | NA    | NA    | NA | Sjp_0096020.1 | NA                 | NA       |
| unknown      | NA | NA       | NA       | SJC_S002864 | NA    | NA    | NA | Sjp_0096030.1 | NA                 | NA       |
| unknown      | NA | NA       | NA       | SJC_S002864 | NA    | NA    | NA | Sjp_0096040.1 | NA                 | NA       |
| unknown      | NA | NA       | NA       | SJC_S002865 | NA    | NA    | NA | Sjp_0096050.1 | NA                 | NA       |
| unknown      | NA | NA       | NA       | SJC_S002866 | NA    | NA    | NA | Sjp_0096060.1 | cell part          | 0.009037 |
| unknown      | NA | NA       | NA       | SJC_S002866 | NA    | NA    | NA | Sjp_0096070.1 | NA                 | NA       |
| unknown      | NA | NA       | NA       | SJC_S002869 | NA    | NA    | NA | Sjp_0096080.1 | NA                 | NA       |
| HSB10kb_1330 | WZ | 51293414 | 51315597 | SJC_S002870 | 41    | 19171 | +  | Sjp_0096090.1 | NA                 | NA       |
| HSB10kb_1330 | WZ | 51293414 | 51315597 | SJC_S002870 | 41    | 19171 | +  | Sjp_0096100.1 | NA                 | NA       |
| unknown      | NA | NA       | NA       | SJC_S002870 | NA    | NA    | NA | Sjp_0096110.1 | cell part          | 0.009037 |
| unknown      | NA | NA       | NA       | SJC_S002872 | NA    | NA    | NA | Sjp_0096120.1 | NA                 | NA       |
| unknown      | NA | NA       | NA       | SJC_S002873 | NA    | NA    | NA | Sjp_0096130.1 | transporter        | 0.782    |



|         |    |    |    |             |    |    |    |               |                       |          |
|---------|----|----|----|-------------|----|----|----|---------------|-----------------------|----------|
|         |    |    |    |             |    |    |    |               | activity              |          |
| unknown | NA | NA | NA | SJC_S002875 | NA | NA | NA | Sjp_0096140.1 | binding               | 0.052762 |
| unknown | NA | NA | NA | SJC_S002877 | NA | NA | NA | Sjp_0096150.1 | NA                    | NA       |
| unknown | NA | NA | NA | SJC_S002878 | NA | NA | NA | Sjp_0096160.1 | NA                    | NA       |
| unknown | NA | NA | NA | SJC_S002882 | NA | NA | NA | Sjp_0096170.1 | NA                    | NA       |
| unknown | NA | NA | NA | SJC_S002882 | NA | NA | NA | Sjp_0096180.1 | cellular process      | 0.63852  |
| unknown | NA | NA | NA | SJC_S002882 | NA | NA | NA | Sjp_0096190.1 | NA                    | NA       |
| unknown | NA | NA | NA | SJC_S002886 | NA | NA | NA | Sjp_0096200.1 | transporter activity  | 0.782    |
| unknown | NA | NA | NA | SJC_S002892 | NA | NA | NA | Sjp_0096210.1 | NA                    | NA       |
| unknown | NA | NA | NA | SJC_S002893 | NA | NA | NA | Sjp_0096220.1 | NA                    | NA       |
| unknown | NA | NA | NA | SJC_S002894 | NA | NA | NA | Sjp_0096230.1 | NA                    | NA       |
| unknown | NA | NA | NA | SJC_S002898 | NA | NA | NA | Sjp_0096240.1 | NA                    | NA       |
| unknown | NA | NA | NA | SJC_S002902 | NA | NA | NA | Sjp_0096250.1 | NA                    | NA       |
| unknown | NA | NA | NA | SJC_S002904 | NA | NA | NA | Sjp_0096260.1 | NA                    | NA       |
| unknown | NA | NA | NA | SJC_S002905 | NA | NA | NA | Sjp_0096270.1 | NA                    | NA       |
| unknown | NA | NA | NA | SJC_S002909 | NA | NA | NA | Sjp_0096280.1 | NA                    | NA       |
| unknown | NA | NA | NA | SJC_S002912 | NA | NA | NA | Sjp_0096290.1 | transporter activity  | 0.782    |
| unknown | NA | NA | NA | SJC_S002915 | NA | NA | NA | Sjp_0096300.1 | NA                    | NA       |
| unknown | NA | NA | NA | SJC_S002917 | NA | NA | NA | Sjp_0096310.1 | cell part             | 0.009037 |
| unknown | NA | NA | NA | SJC_S002924 | NA | NA | NA | Sjp_0096320.1 | NA                    | NA       |
| unknown | NA | NA | NA | SJC_S002925 | NA | NA | NA | Sjp_0096330.1 | cell part             | 0.009037 |
| unknown | NA | NA | NA | SJC_S002926 | NA | NA | NA | Sjp_0096340.1 | binding               | 0.052762 |
| unknown | NA | NA | NA | SJC_S002930 | NA | NA | NA | Sjp_0096350.1 | transporter activity  | 0.782    |
| unknown | NA | NA | NA | SJC_S002932 | NA | NA | NA | Sjp_0096360.1 | catalytic activity    | 0.035844 |
| unknown | NA | NA | NA | SJC_S002933 | NA | NA | NA | Sjp_0096370.1 | biological regulation | 0.76396  |
| unknown | NA | NA | NA | SJC_S002937 | NA | NA | NA | Sjp_0096380.1 | NA                    | NA       |
| unknown | NA | NA | NA | SJC_S002937 | NA | NA | NA | Sjp_0096390.1 | binding               | 0.052762 |
| unknown | NA | NA | NA | SJC_S002938 | NA | NA | NA | Sjp_0096400.1 | NA                    | NA       |
| unknown | NA | NA | NA | SJC_S002939 | NA | NA | NA | Sjp_0096410.1 | NA                    | NA       |
| unknown | NA | NA | NA | SJC_S002939 | NA | NA | NA | Sjp_0096420.1 | NA                    | NA       |

|              |    |          |          |             |     |       |    |               |                               |          |
|--------------|----|----------|----------|-------------|-----|-------|----|---------------|-------------------------------|----------|
| unknown      | NA | NA       | NA       | SJC_S002941 | NA  | NA    | NA | Sjp_0096430.1 | NA                            | NA       |
| unknown      | NA | NA       | NA       | SJC_S002942 | NA  | NA    | NA | Sjp_0096440.1 | response to stimulus          | NA       |
| unknown      | NA | NA       | NA       | SJC_S002944 | NA  | NA    | NA | Sjp_0096450.1 | NA                            | NA       |
| unknown      | NA | NA       | NA       | SJC_S002946 | NA  | NA    | NA | Sjp_0096460.1 | NA                            | NA       |
| unknown      | NA | NA       | NA       | SJC_S002948 | NA  | NA    | NA | Sjp_0096470.1 | catalytic activity            | 0.035844 |
| unknown      | NA | NA       | NA       | SJC_S002951 | NA  | NA    | NA | Sjp_0096480.1 | catalytic activity            | 0.035844 |
| unknown      | NA | NA       | NA       | SJC_S002952 | NA  | NA    | NA | Sjp_0096490.1 | NA                            | NA       |
| unknown      | NA | NA       | NA       | SJC_S002954 | NA  | NA    | NA | Sjp_0096500.1 | NA                            | NA       |
| unknown      | NA | NA       | NA       | SJC_S002954 | NA  | NA    | NA | Sjp_0096510.1 | NA                            | NA       |
| unknown      | NA | NA       | NA       | SJC_S002956 | NA  | NA    | NA | Sjp_0096520.1 | NA                            | NA       |
| unknown      | NA | NA       | NA       | SJC_S002959 | NA  | NA    | NA | Sjp_0096530.1 | NA                            | NA       |
| unknown      | NA | NA       | NA       | SJC_S002965 | NA  | NA    | NA | Sjp_0096540.1 | NA                            | NA       |
| unknown      | NA | NA       | NA       | SJC_S002966 | NA  | NA    | NA | Sjp_0096550.1 | NA                            | NA       |
| unknown      | NA | NA       | NA       | SJC_S002969 | NA  | NA    | NA | Sjp_0096560.1 | NA                            | NA       |
| unknown      | NA | NA       | NA       | SJC_S002970 | NA  | NA    | NA | Sjp_0096580.1 | NA                            | NA       |
| unknown      | NA | NA       | NA       | SJC_S002972 | NA  | NA    | NA | Sjp_0096590.1 | NA                            | NA       |
| unknown      | NA | NA       | NA       | SJC_S002973 | NA  | NA    | NA | Sjp_0096600.1 | NA                            | NA       |
| unknown      | NA | NA       | NA       | SJC_S002974 | NA  | NA    | NA | Sjp_0096610.1 | NA                            | NA       |
| unknown      | NA | NA       | NA       | SJC_S002975 | NA  | NA    | NA | Sjp_0096620.1 | NA                            | NA       |
| unknown      | NA | NA       | NA       | SJC_S002976 | NA  | NA    | NA | Sjp_0096630.1 | biological regulation         | 0.76396  |
| unknown      | NA | NA       | NA       | SJC_S002978 | NA  | NA    | NA | Sjp_0096640.1 | NA                            | NA       |
| unknown      | NA | NA       | NA       | SJC_S002979 | NA  | NA    | NA | Sjp_0096650.1 | NA                            | NA       |
| unknown      | NA | NA       | NA       | SJC_S002982 | NA  | NA    | NA | Sjp_0096660.1 | NA                            | NA       |
| unknown      | NA | NA       | NA       | SJC_S002985 | NA  | NA    | NA | Sjp_0096670.1 | NA                            | NA       |
| HSB10kb_1331 | 2  | 25897854 | 25919488 | SJC_S002987 | 455 | 17016 | +  | Sjp_0096680.1 | transporter activity          | 0.782    |
| unknown      | NA | NA       | NA       | SJC_S002988 | NA  | NA    | NA | Sjp_0096690.1 | NA                            | NA       |
| unknown      | NA | NA       | NA       | SJC_S002990 | NA  | NA    | NA | Sjp_0096700.1 | molecular transducer activity | 0.50162  |
| unknown      | NA | NA       | NA       | SJC_S002991 | NA  | NA    | NA | Sjp_0096710.1 | NA                            | NA       |
| unknown      | NA | NA       | NA       | SJC_S002991 | NA  | NA    | NA | Sjp_0096720.1 | cell part                     | 0.009037 |

|              |    |          |          |             |       |       |    |               |                       |          |
|--------------|----|----------|----------|-------------|-------|-------|----|---------------|-----------------------|----------|
| unknown      | NA | NA       | NA       | SJC_S002992 | NA    | NA    | NA | Sjp_0096730.1 | NA                    | NA       |
| HSB10kb_1332 | 1  | 13797415 | 13840712 | SJC_S002993 | 3310  | 25959 | -  | Sjp_0096740.1 | NA                    | NA       |
| HSB10kb_1332 | 1  | 13797415 | 13840712 | SJC_S002993 | 3310  | 25959 | -  | Sjp_0096750.1 | NA                    | NA       |
| HSB10kb_1332 | 1  | 13797415 | 13840712 | SJC_S002993 | 3310  | 25959 | -  | Sjp_0096760.1 | NA                    | NA       |
| unknown      | NA | NA       | NA       | SJC_S002994 | NA    | NA    | NA | Sjp_0096770.1 | NA                    | NA       |
| unknown      | NA | NA       | NA       | SJC_S002995 | NA    | NA    | NA | Sjp_0096780.1 | NA                    | NA       |
| unknown      | NA | NA       | NA       | SJC_S002997 | NA    | NA    | NA | Sjp_0096790.1 | NA                    | NA       |
| unknown      | NA | NA       | NA       | SJC_S002998 | NA    | NA    | NA | Sjp_0096800.1 | NA                    | NA       |
| unknown      | NA | NA       | NA       | SJC_S002999 | NA    | NA    | NA | Sjp_0096810.1 | NA                    | NA       |
| unknown      | NA | NA       | NA       | SJC_S002999 | NA    | NA    | NA | Sjp_0096820.1 | NA                    | NA       |
| unknown      | NA | NA       | NA       | SJC_S003000 | NA    | NA    | NA | Sjp_0096830.1 | NA                    | NA       |
| unknown      | NA | NA       | NA       | SJC_S003001 | NA    | NA    | NA | Sjp_0096840.1 | NA                    | NA       |
| unknown      | NA | NA       | NA       | SJC_S003002 | NA    | NA    | NA | Sjp_0096850.1 | NA                    | NA       |
| unknown      | NA | NA       | NA       | SJC_S003002 | NA    | NA    | NA | Sjp_0096860.1 | NA                    | NA       |
| unknown      | NA | NA       | NA       | SJC_S003003 | NA    | NA    | NA | Sjp_0096870.1 | NA                    | NA       |
| unknown      | NA | NA       | NA       | SJC_S003004 | NA    | NA    | NA | Sjp_0096880.1 | NA                    | NA       |
| unknown      | NA | NA       | NA       | SJC_S003005 | NA    | NA    | NA | Sjp_0096890.1 | catalytic activity    | 0.035844 |
| unknown      | NA | NA       | NA       | SJC_S003006 | NA    | NA    | NA | Sjp_0096900.1 | biological regulation | 0.76396  |
| HSB10kb_1333 | WZ | 15178406 | 15189002 | SJC_S003006 | 19596 | 29873 | -  | Sjp_0096910.1 | biological regulation | 0.76396  |
| unknown      | NA | NA       | NA       | SJC_S003007 | NA    | NA    | NA | Sjp_0096920.1 | NA                    | NA       |
| unknown      | NA | NA       | NA       | SJC_S003008 | NA    | NA    | NA | Sjp_0096930.1 | catalytic activity    | 0.035844 |
| unknown      | NA | NA       | NA       | SJC_S003009 | NA    | NA    | NA | Sjp_0096940.1 | NA                    | NA       |
| unknown      | NA | NA       | NA       | SJC_S003011 | NA    | NA    | NA | Sjp_0096950.1 | NA                    | NA       |
| unknown      | NA | NA       | NA       | SJC_S003012 | NA    | NA    | NA | Sjp_0096960.1 | NA                    | NA       |
| unknown      | NA | NA       | NA       | SJC_S003014 | NA    | NA    | NA | Sjp_0096970.1 | binding               | 0.052762 |
| unknown      | NA | NA       | NA       | SJC_S003016 | NA    | NA    | NA | Sjp_0096990.1 | NA                    | NA       |
| unknown      | NA | NA       | NA       | SJC_S003016 | NA    | NA    | NA | Sjp_0097000.1 | cellular process      | 0.63852  |
| unknown      | NA | NA       | NA       | SJC_S003018 | NA    | NA    | NA | Sjp_0097010.1 | NA                    | NA       |
| unknown      | NA | NA       | NA       | SJC_S003020 | NA    | NA    | NA | Sjp_0097020.1 | NA                    | NA       |
| unknown      | NA | NA       | NA       | SJC_S003020 | NA    | NA    | NA | Sjp_0097030.1 | NA                    | NA       |
| unknown      | NA | NA       | NA       | SJC_S003021 | NA    | NA    | NA | Sjp_0097040.1 | binding               | 0.052762 |
| unknown      | NA | NA       | NA       | SJC_S003026 | NA    | NA    | NA | Sjp_0097050.1 | NA                    | NA       |

|         |    |    |    |             |    |    |    |               |                       |          |
|---------|----|----|----|-------------|----|----|----|---------------|-----------------------|----------|
| unknown | NA | NA | NA | SJC_S003027 | NA | NA | NA | Sjp_0097060.1 | NA                    | NA       |
| unknown | NA | NA | NA | SJC_S003029 | NA | NA | NA | Sjp_0097070.1 | NA                    | NA       |
| unknown | NA | NA | NA | SJC_S003035 | NA | NA | NA | Sjp_0097080.1 | NA                    | NA       |
| unknown | NA | NA | NA | SJC_S003035 | NA | NA | NA | Sjp_0097090.1 | NA                    | NA       |
| unknown | NA | NA | NA | SJC_S003037 | NA | NA | NA | Sjp_0097100.1 | NA                    | NA       |
| unknown | NA | NA | NA | SJC_S003039 | NA | NA | NA | Sjp_0097110.1 | NA                    | NA       |
| unknown | NA | NA | NA | SJC_S003042 | NA | NA | NA | Sjp_0097120.1 | transporter activity  | 0.782    |
| unknown | NA | NA | NA | SJC_S003044 | NA | NA | NA | Sjp_0097130.1 | NA                    | NA       |
| unknown | NA | NA | NA | SJC_S003045 | NA | NA | NA | Sjp_0097140.1 | NA                    | NA       |
| unknown | NA | NA | NA | SJC_S003045 | NA | NA | NA | Sjp_0097150.1 | NA                    | NA       |
| unknown | NA | NA | NA | SJC_S003046 | NA | NA | NA | Sjp_0097160.1 | NA                    | NA       |
| unknown | NA | NA | NA | SJC_S003049 | NA | NA | NA | Sjp_0097170.1 | metabolic process     | 0.41934  |
| unknown | NA | NA | NA | SJC_S003052 | NA | NA | NA | Sjp_0097180.1 | NA                    | NA       |
| unknown | NA | NA | NA | SJC_S003066 | NA | NA | NA | Sjp_0097190.1 | NA                    | NA       |
| unknown | NA | NA | NA | SJC_S003068 | NA | NA | NA | Sjp_0097200.1 | biological regulation | 0.76396  |
| unknown | NA | NA | NA | SJC_S003070 | NA | NA | NA | Sjp_0097210.1 | binding               | 0.052762 |
| unknown | NA | NA | NA | SJC_S003074 | NA | NA | NA | Sjp_0097220.1 | metabolic process     | 0.41934  |
| unknown | NA | NA | NA | SJC_S003078 | NA | NA | NA | Sjp_0097230.1 | NA                    | NA       |
| unknown | NA | NA | NA | SJC_S003085 | NA | NA | NA | Sjp_0097240.1 | binding               | 0.052762 |
| unknown | NA | NA | NA | SJC_S003093 | NA | NA | NA | Sjp_0097250.1 | transporter activity  | 0.782    |
| unknown | NA | NA | NA | SJC_S003094 | NA | NA | NA | Sjp_0097260.1 | NA                    | NA       |
| unknown | NA | NA | NA | SJC_S003096 | NA | NA | NA | Sjp_0097270.1 | NA                    | NA       |
| unknown | NA | NA | NA | SJC_S003097 | NA | NA | NA | Sjp_0097280.1 | NA                    | NA       |
| unknown | NA | NA | NA | SJC_S003099 | NA | NA | NA | Sjp_0097290.1 | NA                    | NA       |
| unknown | NA | NA | NA | SJC_S003103 | NA | NA | NA | Sjp_0097300.1 | NA                    | NA       |
| unknown | NA | NA | NA | SJC_S003110 | NA | NA | NA | Sjp_0097310.1 | transporter activity  | 0.782    |
| unknown | NA | NA | NA | SJC_S003111 | NA | NA | NA | Sjp_0097320.1 | NA                    | NA       |
| unknown | NA | NA | NA | SJC_S003113 | NA | NA | NA | Sjp_0097330.1 | binding               | 0.052762 |

|              |    |          |          |             |       |       |    |               |                       |          |
|--------------|----|----------|----------|-------------|-------|-------|----|---------------|-----------------------|----------|
| unknown      | NA | NA       | NA       | SJC_S003116 | NA    | NA    | NA | Sjp_0097340.1 | NA                    | NA       |
| unknown      | NA | NA       | NA       | SJC_S003122 | NA    | NA    | NA | Sjp_0097350.1 | NA                    | NA       |
| unknown      | NA | NA       | NA       | SJC_S003125 | NA    | NA    | NA | Sjp_0097360.1 | NA                    | NA       |
| unknown      | NA | NA       | NA       | SJC_S003129 | NA    | NA    | NA | Sjp_0097370.1 | NA                    | NA       |
| unknown      | NA | NA       | NA       | SJC_S003137 | NA    | NA    | NA | Sjp_0097380.1 | NA                    | NA       |
| unknown      | NA | NA       | NA       | SJC_S003143 | NA    | NA    | NA | Sjp_0097390.1 | NA                    | NA       |
| unknown      | NA | NA       | NA       | SJC_S003148 | NA    | NA    | NA | Sjp_0097400.1 | NA                    | NA       |
| unknown      | NA | NA       | NA       | SJC_S003156 | NA    | NA    | NA | Sjp_0097410.1 | NA                    | NA       |
| unknown      | NA | NA       | NA       | SJC_S003158 | NA    | NA    | NA | Sjp_0097420.1 | NA                    | NA       |
| unknown      | NA | NA       | NA       | SJC_S003162 | NA    | NA    | NA | Sjp_0097430.1 | NA                    | NA       |
| unknown      | NA | NA       | NA       | SJC_S003163 | NA    | NA    | NA | Sjp_0097440.1 | NA                    | NA       |
| unknown      | NA | NA       | NA       | SJC_S003164 | NA    | NA    | NA | Sjp_0097450.1 | NA                    | NA       |
| unknown      | NA | NA       | NA       | SJC_S003165 | NA    | NA    | NA | Sjp_0097460.1 | NA                    | NA       |
| unknown      | NA | NA       | NA       | SJC_S003168 | NA    | NA    | NA | Sjp_0097470.1 | NA                    | NA       |
| unknown      | NA | NA       | NA       | SJC_S003173 | NA    | NA    | NA | Sjp_0097480.1 | biological regulation | 0.76396  |
| HSB10kb_1334 | 1  | 57345474 | 57358812 | SJC_S003175 | 12261 | 25272 | -  | Sjp_0097490.1 | transporter activity  | 0.782    |
| HSB10kb_1334 | 1  | 57345474 | 57358812 | SJC_S003175 | 12261 | 25272 | -  | Sjp_0097500.1 | transporter activity  | 0.782    |
| unknown      | NA | NA       | NA       | SJC_S003178 | NA    | NA    | NA | Sjp_0097510.1 | NA                    | NA       |
| unknown      | NA | NA       | NA       | SJC_S003179 | NA    | NA    | NA | Sjp_0097520.1 | binding               | 0.052762 |
| unknown      | NA | NA       | NA       | SJC_S003180 | NA    | NA    | NA | Sjp_0097530.1 | transporter activity  | 0.782    |
| unknown      | NA | NA       | NA       | SJC_S003181 | NA    | NA    | NA | Sjp_0097540.1 | NA                    | NA       |
| unknown      | NA | NA       | NA       | SJC_S003182 | NA    | NA    | NA | Sjp_0097550.1 | NA                    | NA       |
| unknown      | NA | NA       | NA       | SJC_S003183 | NA    | NA    | NA | Sjp_0097560.1 | NA                    | NA       |
| unknown      | NA | NA       | NA       | SJC_S003183 | NA    | NA    | NA | Sjp_0097570.1 | NA                    | NA       |
| unknown      | NA | NA       | NA       | SJC_S003187 | NA    | NA    | NA | Sjp_0097580.1 | NA                    | NA       |
| unknown      | NA | NA       | NA       | SJC_S003190 | NA    | NA    | NA | Sjp_0097590.1 | NA                    | NA       |
| unknown      | NA | NA       | NA       | SJC_S003192 | NA    | NA    | NA | Sjp_0097600.1 | NA                    | NA       |
| unknown      | NA | NA       | NA       | SJC_S003194 | NA    | NA    | NA | Sjp_0097610.1 | NA                    | NA       |
| unknown      | NA | NA       | NA       | SJC_S003197 | NA    | NA    | NA | Sjp_0097620.1 | NA                    | NA       |
| unknown      | NA | NA       | NA       | SJC_S003200 | NA    | NA    | NA | Sjp_0097630.1 | binding               | 0.052762 |

|         |    |    |    |             |    |    |    |               |                               |          |
|---------|----|----|----|-------------|----|----|----|---------------|-------------------------------|----------|
| unknown | NA | NA | NA | SJC_S003203 | NA | NA | NA | Sjp_0097640.1 | binding                       | 0.052762 |
| unknown | NA | NA | NA | SJC_S003207 | NA | NA | NA | Sjp_0097650.1 | NA                            | NA       |
| unknown | NA | NA | NA | SJC_S003210 | NA | NA | NA | Sjp_0097660.1 | NA                            | NA       |
| unknown | NA | NA | NA | SJC_S003211 | NA | NA | NA | Sjp_0097670.1 | NA                            | NA       |
| unknown | NA | NA | NA | SJC_S003213 | NA | NA | NA | Sjp_0097680.1 | NA                            | NA       |
| unknown | NA | NA | NA | SJC_S003216 | NA | NA | NA | Sjp_0097690.1 | NA                            | NA       |
| unknown | NA | NA | NA | SJC_S003217 | NA | NA | NA | Sjp_0097700.1 | binding                       | 0.052762 |
| unknown | NA | NA | NA | SJC_S003219 | NA | NA | NA | Sjp_0097710.1 | catalytic activity            | 0.035844 |
| unknown | NA | NA | NA | SJC_S003220 | NA | NA | NA | Sjp_0097720.1 | molecular transducer activity | 0.50162  |
| unknown | NA | NA | NA | SJC_S003221 | NA | NA | NA | Sjp_0097730.1 | NA                            | NA       |
| unknown | NA | NA | NA | SJC_S003224 | NA | NA | NA | Sjp_0097740.1 | transporter activity          | 0.782    |
| unknown | NA | NA | NA | SJC_S003228 | NA | NA | NA | Sjp_0097750.1 | NA                            | NA       |
| unknown | NA | NA | NA | SJC_S003230 | NA | NA | NA | Sjp_0097760.1 | NA                            | NA       |
| unknown | NA | NA | NA | SJC_S003231 | NA | NA | NA | Sjp_0097770.1 | NA                            | NA       |
| unknown | NA | NA | NA | SJC_S003232 | NA | NA | NA | Sjp_0097780.1 | catalytic activity            | 0.035844 |
| unknown | NA | NA | NA | SJC_S003233 | NA | NA | NA | Sjp_0097790.1 | NA                            | NA       |
| unknown | NA | NA | NA | SJC_S003237 | NA | NA | NA | Sjp_0097800.1 | NA                            | NA       |
| unknown | NA | NA | NA | SJC_S003239 | NA | NA | NA | Sjp_0097810.1 | NA                            | NA       |
| unknown | NA | NA | NA | SJC_S003239 | NA | NA | NA | Sjp_0097820.1 | NA                            | NA       |
| unknown | NA | NA | NA | SJC_S003242 | NA | NA | NA | Sjp_0097830.1 | NA                            | NA       |
| unknown | NA | NA | NA | SJC_S003247 | NA | NA | NA | Sjp_0097840.1 | NA                            | NA       |
| unknown | NA | NA | NA | SJC_S003247 | NA | NA | NA | Sjp_0097850.1 | NA                            | NA       |
| unknown | NA | NA | NA | SJC_S003248 | NA | NA | NA | Sjp_0097860.1 | NA                            | NA       |
| unknown | NA | NA | NA | SJC_S003250 | NA | NA | NA | Sjp_0097870.1 | NA                            | NA       |
| unknown | NA | NA | NA | SJC_S003253 | NA | NA | NA | Sjp_0097880.1 | NA                            | NA       |
| unknown | NA | NA | NA | SJC_S003255 | NA | NA | NA | Sjp_0097890.1 | NA                            | NA       |
| unknown | NA | NA | NA | SJC_S003256 | NA | NA | NA | Sjp_0097900.1 | NA                            | NA       |
| unknown | NA | NA | NA | SJC_S003257 | NA | NA | NA | Sjp_0097910.1 | binding                       | 0.052762 |
| unknown | NA | NA | NA | SJC_S003263 | NA | NA | NA | Sjp_0097920.1 | NA                            | NA       |
| unknown | NA | NA | NA | SJC_S003264 | NA | NA | NA | Sjp_0097930.1 | catalytic activity            | 0.035844 |
| unknown | NA | NA | NA | SJC_S003265 | NA | NA | NA | Sjp_0097940.1 | NA                            | NA       |

|              |    |         |         |             |    |       |    |               |                                    |          |
|--------------|----|---------|---------|-------------|----|-------|----|---------------|------------------------------------|----------|
| unknown      | NA | NA      | NA      | SJC_S003268 | NA | NA    | NA | Sjp_0097950.1 | NA                                 | NA       |
| unknown      | NA | NA      | NA      | SJC_S003270 | NA | NA    | NA | Sjp_0097960.1 | NA                                 | NA       |
| unknown      | NA | NA      | NA      | SJC_S003272 | NA | NA    | NA | Sjp_0097970.1 | NA                                 | NA       |
| unknown      | NA | NA      | NA      | SJC_S003274 | NA | NA    | NA | Sjp_0097980.1 | NA                                 | NA       |
| unknown      | NA | NA      | NA      | SJC_S003277 | NA | NA    | NA | Sjp_0097990.1 | biological regulation              | 0.76396  |
| unknown      | NA | NA      | NA      | SJC_S003278 | NA | NA    | NA | Sjp_0098000.1 | NA                                 | NA       |
| unknown      | NA | NA      | NA      | SJC_S003279 | NA | NA    | NA | Sjp_0098010.1 | catalytic activity                 | 0.035844 |
| unknown      | NA | NA      | NA      | SJC_S003284 | NA | NA    | NA | Sjp_0098020.1 | NA                                 | NA       |
| unknown      | NA | NA      | NA      | SJC_S003285 | NA | NA    | NA | Sjp_0098030.1 | catalytic activity                 | 0.035844 |
| unknown      | NA | NA      | NA      | SJC_S003286 | NA | NA    | NA | Sjp_0098040.1 | NA                                 | NA       |
| unknown      | NA | NA      | NA      | SJC_S003292 | NA | NA    | NA | Sjp_0098050.1 | NA                                 | NA       |
| unknown      | NA | NA      | NA      | SJC_S003292 | NA | NA    | NA | Sjp_0098060.1 | NA                                 | NA       |
| unknown      | NA | NA      | NA      | SJC_S003294 | NA | NA    | NA | Sjp_0098070.1 | biological regulation              | 0.76396  |
| unknown      | NA | NA      | NA      | SJC_S003297 | NA | NA    | NA | Sjp_0098080.1 | NA                                 | NA       |
| HSB10kb_1335 | WZ | 9900033 | 9910824 | SJC_S003298 | 27 | 14240 | +  | Sjp_0098090.1 | NA                                 | NA       |
| unknown      | NA | NA      | NA      | SJC_S003305 | NA | NA    | NA | Sjp_0098100.1 | NA                                 | NA       |
| unknown      | NA | NA      | NA      | SJC_S003310 | NA | NA    | NA | Sjp_0098120.1 | NA                                 | NA       |
| unknown      | NA | NA      | NA      | SJC_S003315 | NA | NA    | NA | Sjp_0098130.1 | NA                                 | NA       |
| unknown      | NA | NA      | NA      | SJC_S003325 | NA | NA    | NA | Sjp_0098140.1 | NA                                 | NA       |
| unknown      | NA | NA      | NA      | SJC_S003346 | NA | NA    | NA | Sjp_0098150.1 | NA                                 | NA       |
| unknown      | NA | NA      | NA      | SJC_S003349 | NA | NA    | NA | Sjp_0098160.1 | NA                                 | NA       |
| unknown      | NA | NA      | NA      | SJC_S003351 | NA | NA    | NA | Sjp_0098170.1 | NA                                 | NA       |
| unknown      | NA | NA      | NA      | SJC_S003357 | NA | NA    | NA | Sjp_0098180.1 | NA                                 | NA       |
| unknown      | NA | NA      | NA      | SJC_S003358 | NA | NA    | NA | Sjp_0098190.1 | NA                                 | NA       |
| unknown      | NA | NA      | NA      | SJC_S003361 | NA | NA    | NA | Sjp_0098200.1 | NA                                 | NA       |
| unknown      | NA | NA      | NA      | SJC_S003386 | NA | NA    | NA | Sjp_0098210.1 | NA                                 | NA       |
| unknown      | NA | NA      | NA      | SJC_S003390 | NA | NA    | NA | Sjp_0098220.1 | NA                                 | NA       |
| unknown      | NA | NA      | NA      | SJC_S003392 | NA | NA    | NA | Sjp_0098230.1 | NA                                 | NA       |
| unknown      | NA | NA      | NA      | SJC_S003393 | NA | NA    | NA | Sjp_0098240.1 | NA                                 | NA       |
| unknown      | NA | NA      | NA      | SJC_S003416 | NA | NA    | NA | Sjp_0098260.1 | cellular component organization or | NA       |

|         |    |    |    |             |    |    |    |               |                                                     |          |
|---------|----|----|----|-------------|----|----|----|---------------|-----------------------------------------------------|----------|
|         |    |    |    |             |    |    |    |               | biogenesis                                          |          |
| unknown | NA | NA | NA | SJC_S003425 | NA | NA | NA | Sjp_0098270.1 | NA                                                  | NA       |
| unknown | NA | NA | NA | SJC_S003446 | NA | NA | NA | Sjp_0098280.1 | NA                                                  | NA       |
| unknown | NA | NA | NA | SJC_S003451 | NA | NA | NA | Sjp_0098290.1 | NA                                                  | NA       |
| unknown | NA | NA | NA | SJC_S003453 | NA | NA | NA | Sjp_0098300.1 | NA                                                  | NA       |
| unknown | NA | NA | NA | SJC_S003454 | NA | NA | NA | Sjp_0098310.1 | NA                                                  | NA       |
| unknown | NA | NA | NA | SJC_S003455 | NA | NA | NA | Sjp_0098320.1 | NA                                                  | NA       |
| unknown | NA | NA | NA | SJC_S003456 | NA | NA | NA | Sjp_0098330.1 | NA                                                  | NA       |
| unknown | NA | NA | NA | SJC_S003458 | NA | NA | NA | Sjp_0098340.1 | NA                                                  | NA       |
| unknown | NA | NA | NA | SJC_S003461 | NA | NA | NA | Sjp_0098350.1 | NA                                                  | NA       |
| unknown | NA | NA | NA | SJC_S003465 | NA | NA | NA | Sjp_0098370.1 | NA                                                  | NA       |
| unknown | NA | NA | NA | SJC_S003474 | NA | NA | NA | Sjp_0098390.1 | NA                                                  | NA       |
| unknown | NA | NA | NA | SJC_S003475 | NA | NA | NA | Sjp_0098400.1 | NA                                                  | NA       |
| unknown | NA | NA | NA | SJC_S003476 | NA | NA | NA | Sjp_0098410.1 | NA                                                  | NA       |
| unknown | NA | NA | NA | SJC_S003477 | NA | NA | NA | Sjp_0098420.1 | cell part                                           | 0.009037 |
| unknown | NA | NA | NA | SJC_S003480 | NA | NA | NA | Sjp_0098430.1 | NA                                                  | NA       |
| unknown | NA | NA | NA | SJC_S003483 | NA | NA | NA | Sjp_0098440.1 | NA                                                  | NA       |
| unknown | NA | NA | NA | SJC_S003487 | NA | NA | NA | Sjp_0098450.1 | NA                                                  | NA       |
| unknown | NA | NA | NA | SJC_S003494 | NA | NA | NA | Sjp_0098460.1 | NA                                                  | NA       |
| unknown | NA | NA | NA | SJC_S003499 | NA | NA | NA | Sjp_0098470.1 | NA                                                  | NA       |
| unknown | NA | NA | NA | SJC_S003506 | NA | NA | NA | Sjp_0098480.1 | NA                                                  | NA       |
| unknown | NA | NA | NA | SJC_S003509 | NA | NA | NA | Sjp_0098490.1 | protein binding<br>transcription<br>factor activity | NA       |
| unknown | NA | NA | NA | SJC_S003510 | NA | NA | NA | Sjp_0098500.1 | binding                                             | 0.052762 |
| unknown | NA | NA | NA | SJC_S003513 | NA | NA | NA | Sjp_0098510.1 | NA                                                  | NA       |
| unknown | NA | NA | NA | SJC_S003514 | NA | NA | NA | Sjp_0098520.1 | NA                                                  | NA       |
| unknown | NA | NA | NA | SJC_S003525 | NA | NA | NA | Sjp_0098530.1 | NA                                                  | NA       |
| unknown | NA | NA | NA | SJC_S003526 | NA | NA | NA | Sjp_0098540.1 | NA                                                  | NA       |
| unknown | NA | NA | NA | SJC_S003528 | NA | NA | NA | Sjp_0098550.1 | NA                                                  | NA       |
| unknown | NA | NA | NA | SJC_S003532 | NA | NA | NA | Sjp_0098560.1 | NA                                                  | NA       |
| unknown | NA | NA | NA | SJC_S003533 | NA | NA | NA | Sjp_0098570.1 | NA                                                  | NA       |
| unknown | NA | NA | NA | SJC_S003534 | NA | NA | NA | Sjp_0098580.1 | catalytic activity                                  | 0.035844 |
| unknown | NA | NA | NA | SJC_S003536 | NA | NA | NA | Sjp_0098590.1 | NA                                                  | NA       |



|              |    |          |          |             |     |       |    |               |                           |          |
|--------------|----|----------|----------|-------------|-----|-------|----|---------------|---------------------------|----------|
| unknown      | NA | NA       | NA       | SJC_S003540 | NA  | NA    | NA | Sjp_0098600.1 | NA                        | NA       |
| unknown      | NA | NA       | NA       | SJC_S003540 | NA  | NA    | NA | Sjp_0098610.1 | enzyme regulator activity | 0.1755   |
| unknown      | NA | NA       | NA       | SJC_S003542 | NA  | NA    | NA | Sjp_0098620.1 | cell part                 | 0.009037 |
| unknown      | NA | NA       | NA       | SJC_S003543 | NA  | NA    | NA | Sjp_0098630.1 | NA                        | NA       |
| unknown      | NA | NA       | NA       | SJC_S003543 | NA  | NA    | NA | Sjp_0098640.1 | NA                        | NA       |
| unknown      | NA | NA       | NA       | SJC_S003549 | NA  | NA    | NA | Sjp_0098660.1 | NA                        | NA       |
| unknown      | NA | NA       | NA       | SJC_S003559 | NA  | NA    | NA | Sjp_0098670.1 | transporter activity      | 0.782    |
| unknown      | NA | NA       | NA       | SJC_S003561 | NA  | NA    | NA | Sjp_0098680.1 | NA                        | NA       |
| unknown      | NA | NA       | NA       | SJC_S003562 | NA  | NA    | NA | Sjp_0098690.1 | NA                        | NA       |
| unknown      | NA | NA       | NA       | SJC_S003565 | NA  | NA    | NA | Sjp_0098700.1 | NA                        | NA       |
| unknown      | NA | NA       | NA       | SJC_S003569 | NA  | NA    | NA | Sjp_0098710.1 | NA                        | NA       |
| unknown      | NA | NA       | NA       | SJC_S003574 | NA  | NA    | NA | Sjp_0098720.1 | NA                        | NA       |
| unknown      | NA | NA       | NA       | SJC_S003576 | NA  | NA    | NA | Sjp_0098730.1 | NA                        | NA       |
| unknown      | NA | NA       | NA       | SJC_S003580 | NA  | NA    | NA | Sjp_0098740.1 | NA                        | NA       |
| unknown      | NA | NA       | NA       | SJC_S003582 | NA  | NA    | NA | Sjp_0098750.1 | NA                        | NA       |
| unknown      | NA | NA       | NA       | SJC_S003584 | NA  | NA    | NA | Sjp_0098760.1 | NA                        | NA       |
| unknown      | NA | NA       | NA       | SJC_S003585 | NA  | NA    | NA | Sjp_0098770.1 | cellular process          | 0.63852  |
| unknown      | NA | NA       | NA       | SJC_S003587 | NA  | NA    | NA | Sjp_0098780.1 | NA                        | NA       |
| unknown      | NA | NA       | NA       | SJC_S003592 | NA  | NA    | NA | Sjp_0098800.1 | NA                        | NA       |
| unknown      | NA | NA       | NA       | SJC_S003593 | NA  | NA    | NA | Sjp_0098810.1 | biological regulation     | 0.76396  |
| unknown      | NA | NA       | NA       | SJC_S003594 | NA  | NA    | NA | Sjp_0098820.1 | NA                        | NA       |
| HSB10kb_1336 | 1  | 49535107 | 49548662 | SJC_S003595 | 553 | 14588 | +  | Sjp_0098830.1 | NA                        | NA       |
| unknown      | NA | NA       | NA       | SJC_S003597 | NA  | NA    | NA | Sjp_0098840.1 | binding                   | 0.052762 |
| unknown      | NA | NA       | NA       | SJC_S003598 | NA  | NA    | NA | Sjp_0098850.1 | NA                        | NA       |
| unknown      | NA | NA       | NA       | SJC_S003599 | NA  | NA    | NA | Sjp_0098860.1 | NA                        | NA       |
| unknown      | NA | NA       | NA       | SJC_S003600 | NA  | NA    | NA | Sjp_0098880.1 | catalytic activity        | 0.035844 |
| unknown      | NA | NA       | NA       | SJC_S003601 | NA  | NA    | NA | Sjp_0098890.1 | NA                        | NA       |
| unknown      | NA | NA       | NA       | SJC_S003601 | NA  | NA    | NA | Sjp_0098900.1 | biological regulation     | 0.76396  |
| unknown      | NA | NA       | NA       | SJC_S003605 | NA  | NA    | NA | Sjp_0098910.1 | NA                        | NA       |

|              |       |          |          |             |       |        |    |               |                      |          |
|--------------|-------|----------|----------|-------------|-------|--------|----|---------------|----------------------|----------|
| unknown      | NA    | NA       | NA       | SJC_S003605 | NA    | NA     | NA | Sjp_0098920.1 | NA                   | NA       |
| unknown      | NA    | NA       | NA       | SJC_S003605 | NA    | NA     | NA | Sjp_0098930.1 | NA                   | NA       |
| unknown      | NA    | NA       | NA       | SJC_S003606 | NA    | NA     | NA | Sjp_0098940.1 | catalytic activity   | 0.035844 |
| unknown      | NA    | NA       | NA       | SJC_S003606 | NA    | NA     | NA | Sjp_0098950.1 | NA                   | NA       |
| unknown      | NA    | NA       | NA       | SJC_S003607 | NA    | NA     | NA | Sjp_0098960.1 | NA                   | NA       |
| unknown      | NA    | NA       | NA       | SJC_S003608 | NA    | NA     | NA | Sjp_0098970.1 | NA                   | NA       |
| HSB10kb_1337 | 1     | 18888368 | 18937613 | SJC_S003608 | 55162 | 100305 | -  | Sjp_0098980.1 | NA                   | NA       |
| unknown      | NA    | NA       | NA       | SJC_S003610 | NA    | NA     | NA | Sjp_0098990.1 | transporter activity | 0.782    |
| unknown      | NA    | NA       | NA       | SJC_S003610 | NA    | NA     | NA | Sjp_0099000.1 | NA                   | NA       |
| HSB10kb_1338 | 1     | 1717378  | 1763908  | SJC_S003610 | 17167 | 44413  | +  | Sjp_0099010.1 | transporter activity | 0.782    |
| EBR10kb_476  | "1,1" | NA       | NA       | SJC_S003610 | 44414 | 48107  | NA | Sjp_0099010.1 | transporter activity | 0.782    |
| HSB10kb_1339 | 1     | 16223803 | 16267826 | SJC_S003610 | 48108 | 87753  | +  | Sjp_0099010.1 | transporter activity | 0.782    |
| HSB10kb_1340 | WZ    | 56433729 | 56460461 | SJC_S003611 | 14487 | 24719  |    | NA            | NA                   | NA       |
| HSB10kb_1341 | 1     | 63833779 | 63865648 | SJC_S003612 | 8599  | 42223  | +  | Sjp_0099020.1 | NA                   | NA       |
| HSB10kb_1341 | 1     | 63833779 | 63865648 | SJC_S003612 | 8599  | 42223  | +  | Sjp_0099030.1 | NA                   | NA       |
| HSB10kb_1341 | 1     | 63833779 | 63865648 | SJC_S003612 | 8599  | 42223  | +  | Sjp_0099040.1 | NA                   | NA       |
| HSB10kb_1341 | 1     | 63833779 | 63865648 | SJC_S003612 | 8599  | 42223  | +  | Sjp_0099050.1 | NA                   | NA       |
| unknown      | NA    | NA       | NA       | SJC_S003612 | NA    | NA     | NA | Sjp_0099060.1 | NA                   | NA       |
| unknown      | NA    | NA       | NA       | SJC_S003613 | NA    | NA     | NA | Sjp_0099070.1 | NA                   | NA       |
| unknown      | NA    | NA       | NA       | SJC_S003613 | NA    | NA     | NA | Sjp_0099080.1 | NA                   | NA       |
| unknown      | NA    | NA       | NA       | SJC_S003614 | NA    | NA     | NA | Sjp_0099090.1 | NA                   | NA       |
| unknown      | NA    | NA       | NA       | SJC_S003616 | NA    | NA     | NA | Sjp_0099100.1 | cell part            | 0.009037 |
| HSB10kb_1342 | WZ    | 48395141 | 48424091 | SJC_S003617 | 13738 | 25884  | -  | Sjp_0099120.1 | binding              | 0.052762 |
| HSB10kb_1342 | WZ    | 48395141 | 48424091 | SJC_S003617 | 13738 | 25884  | -  | Sjp_0099130.1 | binding              | 0.052762 |
| HSB10kb_1342 | WZ    | 48395141 | 48424091 | SJC_S003617 | 13738 | 25884  | -  | Sjp_0099140.1 | NA                   | NA       |
| unknown      | NA    | NA       | NA       | SJC_S003617 | NA    | NA     | NA | Sjp_0099150.1 | NA                   | NA       |
| unknown      | NA    | NA       | NA       | SJC_S003618 | NA    | NA     | NA | Sjp_0099160.1 | cell part            | 0.009037 |
| unknown      | NA    | NA       | NA       | SJC_S003618 | NA    | NA     | NA | Sjp_0099170.1 | response to stimulus | NA       |
| unknown      | NA    | NA       | NA       | SJC_S003618 | NA    | NA     | NA | Sjp_0099180.1 | cell part            | 0.009037 |

|              |    |          |          |             |       |       |    |               |                       |          |
|--------------|----|----------|----------|-------------|-------|-------|----|---------------|-----------------------|----------|
| HSB10kb_1343 | WZ | 43294990 | 43343330 | SJC_S003619 | 1450  | 48522 | -  | Sjp_0099190.1 | NA                    | NA       |
| HSB10kb_1343 | WZ | 43294990 | 43343330 | SJC_S003619 | 1450  | 48522 | -  | Sjp_0099200.1 | NA                    | NA       |
| unknown      | NA | NA       | NA       | SJC_S003620 | NA    | NA    | NA | Sjp_0099210.1 | binding               | 0.052762 |
| unknown      | NA | NA       | NA       | SJC_S003620 | NA    | NA    | NA | Sjp_0099220.1 | NA                    | NA       |
| unknown      | NA | NA       | NA       | SJC_S003621 | NA    | NA    | NA | Sjp_0099230.1 | NA                    | NA       |
| HSB10kb_1344 | WZ | 42612938 | 42652056 | SJC_S003622 | 16060 | 63963 | -  | Sjp_0099240.1 | binding               | 0.052762 |
| HSB10kb_1344 | WZ | 42612938 | 42652056 | SJC_S003622 | 16060 | 63963 | -  | Sjp_0099250.1 | binding               | 0.052762 |
| unknown      | NA | NA       | NA       | SJC_S003623 | NA    | NA    | NA | Sjp_0099260.1 | NA                    | NA       |
| unknown      | NA | NA       | NA       | SJC_S003623 | NA    | NA    | NA | Sjp_0099270.1 | catalytic activity    | 0.035844 |
| unknown      | NA | NA       | NA       | SJC_S003623 | NA    | NA    | NA | Sjp_0099280.1 | catalytic activity    | 0.035844 |
| unknown      | NA | NA       | NA       | SJC_S003627 | NA    | NA    | NA | Sjp_0099300.1 | NA                    | NA       |
| unknown      | NA | NA       | NA       | SJC_S003628 | NA    | NA    | NA | Sjp_0099310.1 | NA                    | NA       |
| unknown      | NA | NA       | NA       | SJC_S003629 | NA    | NA    | NA | Sjp_0099320.1 | NA                    | NA       |
| unknown      | NA | NA       | NA       | SJC_S003629 | NA    | NA    | NA | Sjp_0099330.1 | NA                    | NA       |
| unknown      | NA | NA       | NA       | SJC_S003630 | NA    | NA    | NA | Sjp_0099340.1 | binding               | 0.052762 |
| unknown      | NA | NA       | NA       | SJC_S003631 | NA    | NA    | NA | Sjp_0099350.1 | NA                    | NA       |
| HSB10kb_1345 | 1  | 8863068  | 8873733  | SJC_S003631 | 11303 | 22574 | -  | Sjp_0099360.1 | NA                    | NA       |
| HSB10kb_1345 | 1  | 8863068  | 8873733  | SJC_S003631 | 11303 | 22574 | -  | Sjp_0099370.1 | NA                    | NA       |
| unknown      | NA | NA       | NA       | SJC_S003632 | NA    | NA    | NA | Sjp_0099380.1 | NA                    | NA       |
| unknown      | NA | NA       | NA       | SJC_S003633 | NA    | NA    | NA | Sjp_0099390.1 | NA                    | NA       |
| unknown      | NA | NA       | NA       | SJC_S003634 | NA    | NA    | NA | Sjp_0099400.1 | NA                    | NA       |
| unknown      | NA | NA       | NA       | SJC_S003635 | NA    | NA    | NA | Sjp_0099410.1 | biological regulation | 0.76396  |
| unknown      | NA | NA       | NA       | SJC_S003637 | NA    | NA    | NA | Sjp_0099420.1 | NA                    | NA       |
| unknown      | NA | NA       | NA       | SJC_S003637 | NA    | NA    | NA | Sjp_0099430.1 | catalytic activity    | 0.035844 |
| unknown      | NA | NA       | NA       | SJC_S003639 | NA    | NA    | NA | Sjp_0099440.1 | NA                    | NA       |
| unknown      | NA | NA       | NA       | SJC_S003639 | NA    | NA    | NA | Sjp_0099450.1 | NA                    | NA       |
| unknown      | NA | NA       | NA       | SJC_S003642 | NA    | NA    | NA | Sjp_0099460.1 | NA                    | NA       |
| unknown      | NA | NA       | NA       | SJC_S003644 | NA    | NA    | NA | Sjp_0099470.1 | NA                    | NA       |
| HSB10kb_1346 | 2  | 27965189 | 27988361 | SJC_S003644 | 9765  | 28388 | -  | Sjp_0099480.1 | cell part             | 0.009037 |
| unknown      | NA | NA       | NA       | SJC_S003645 | NA    | NA    | NA | Sjp_0099490.1 | NA                    | NA       |
| unknown      | NA | NA       | NA       | SJC_S003645 | NA    | NA    | NA | Sjp_0099500.1 | NA                    | NA       |
| unknown      | NA | NA       | NA       | SJC_S003647 | NA    | NA    | NA | Sjp_0099510.1 | biological regulation | 0.76396  |

|              |    |          |          |             |      |       |    |               |                       |          |
|--------------|----|----------|----------|-------------|------|-------|----|---------------|-----------------------|----------|
| unknown      | NA | NA       | NA       | SJC_S003650 | NA   | NA    | NA | Sjp_0099520.1 | NA                    | NA       |
| unknown      | NA | NA       | NA       | SJC_S003651 | NA   | NA    | NA | Sjp_0099530.1 | binding               | 0.052762 |
| unknown      | NA | NA       | NA       | SJC_S003652 | NA   | NA    | NA | Sjp_0099540.1 | biological regulation | 0.76396  |
| unknown      | NA | NA       | NA       | SJC_S003653 | NA   | NA    | NA | Sjp_0099550.1 | NA                    | NA       |
| unknown      | NA | NA       | NA       | SJC_S003653 | NA   | NA    | NA | Sjp_0099560.1 | metabolic process     | 0.41934  |
| unknown      | NA | NA       | NA       | SJC_S003655 | NA   | NA    | NA | Sjp_0099570.1 | NA                    | NA       |
| unknown      | NA | NA       | NA       | SJC_S003656 | NA   | NA    | NA | Sjp_0099580.1 | NA                    | NA       |
| unknown      | NA | NA       | NA       | SJC_S003658 | NA   | NA    | NA | Sjp_0099590.1 | NA                    | NA       |
| unknown      | NA | NA       | NA       | SJC_S003659 | NA   | NA    | NA | Sjp_0099600.1 | NA                    | NA       |
| unknown      | NA | NA       | NA       | SJC_S003661 | NA   | NA    | NA | Sjp_0099610.1 | NA                    | NA       |
| unknown      | NA | NA       | NA       | SJC_S003662 | NA   | NA    | NA | Sjp_0099620.1 | NA                    | NA       |
| unknown      | NA | NA       | NA       | SJC_S003663 | NA   | NA    | NA | Sjp_0099630.1 | biological regulation | 0.76396  |
| unknown      | NA | NA       | NA       | SJC_S003664 | NA   | NA    | NA | Sjp_0099640.1 | NA                    | NA       |
| unknown      | NA | NA       | NA       | SJC_S003665 | NA   | NA    | NA | Sjp_0099650.1 | NA                    | NA       |
| unknown      | NA | NA       | NA       | SJC_S003667 | NA   | NA    | NA | Sjp_0099660.1 | transporter activity  | 0.782    |
| unknown      | NA | NA       | NA       | SJC_S003668 | NA   | NA    | NA | Sjp_0099670.1 | cell part             | 0.009037 |
| unknown      | NA | NA       | NA       | SJC_S003670 | NA   | NA    | NA | Sjp_0099680.1 | NA                    | NA       |
| unknown      | NA | NA       | NA       | SJC_S003672 | NA   | NA    | NA | Sjp_0099690.1 | NA                    | NA       |
| HSB10kb_1347 | 4  | 1492773  | 1538012  | SJC_S003679 | 6404 | 22226 | -  | Sjp_0099700.1 | biological regulation | 0.76396  |
| unknown      | NA | NA       | NA       | SJC_S003680 | NA   | NA    | NA | Sjp_0099710.1 | NA                    | NA       |
| unknown      | NA | NA       | NA       | SJC_S003683 | NA   | NA    | NA | Sjp_0099730.1 | NA                    | NA       |
| unknown      | NA | NA       | NA       | SJC_S003684 | NA   | NA    | NA | Sjp_0099740.1 | NA                    | NA       |
| unknown      | NA | NA       | NA       | SJC_S003684 | NA   | NA    | NA | Sjp_0099750.1 | NA                    | NA       |
| unknown      | NA | NA       | NA       | SJC_S003685 | NA   | NA    | NA | Sjp_0099760.1 | NA                    | NA       |
| unknown      | NA | NA       | NA       | SJC_S003685 | NA   | NA    | NA | Sjp_0099770.1 | binding               | 0.052762 |
| unknown      | NA | NA       | NA       | SJC_S003686 | NA   | NA    | NA | Sjp_0099780.1 | NA                    | NA       |
| unknown      | NA | NA       | NA       | SJC_S003686 | NA   | NA    | NA | Sjp_0099790.1 | NA                    | NA       |
| HSB10kb_1348 | WZ | 28799575 | 28815075 | SJC_S003687 | 2471 | 19362 | +  | Sjp_0099800.1 | NA                    | NA       |
| unknown      | NA | NA       | NA       | SJC_S003688 | NA   | NA    | NA | Sjp_0099810.1 | NA                    | NA       |

|              |    |         |         |             |       |       |    |               |                                  |          |
|--------------|----|---------|---------|-------------|-------|-------|----|---------------|----------------------------------|----------|
| unknown      | NA | NA      | NA      | SJC_S003689 | NA    | NA    | NA | Sjp_0099820.1 | NA                               | NA       |
| unknown      | NA | NA      | NA      | SJC_S003690 | NA    | NA    | NA | Sjp_0099830.1 | NA                               | NA       |
| HSB10kb_1349 | 1  | 9260517 | 9309950 | SJC_S003692 | 10330 | 41018 | -  | Sjp_0099840.1 | NA                               | NA       |
| HSB10kb_1349 | 1  | 9260517 | 9309950 | SJC_S003692 | 10330 | 41018 | -  | Sjp_0099850.1 | NA                               | NA       |
| unknown      | NA | NA      | NA      | SJC_S003693 | NA    | NA    | NA | Sjp_0099860.1 | establishment of localization    | NA       |
| unknown      | NA | NA      | NA      | SJC_S003693 | NA    | NA    | NA | Sjp_0099870.1 | NA                               | NA       |
| unknown      | NA | NA      | NA      | SJC_S003693 | NA    | NA    | NA | Sjp_0099880.1 | binding                          | 0.052762 |
| unknown      | NA | NA      | NA      | SJC_S003694 | NA    | NA    | NA | Sjp_0099890.1 | NA                               | NA       |
| unknown      | NA | NA      | NA      | SJC_S003695 | NA    | NA    | NA | Sjp_0099900.1 | NA                               | NA       |
| unknown      | NA | NA      | NA      | SJC_S003696 | NA    | NA    | NA | Sjp_0099910.1 | biological regulation            | 0.76396  |
| unknown      | NA | NA      | NA      | SJC_S003698 | NA    | NA    | NA | Sjp_0099920.1 | catalytic activity               | 0.035844 |
| unknown      | NA | NA      | NA      | SJC_S003702 | NA    | NA    | NA | Sjp_0099930.1 | cell part                        | 0.009037 |
| unknown      | NA | NA      | NA      | SJC_S003704 | NA    | NA    | NA | Sjp_0099940.1 | NA                               | NA       |
| unknown      | NA | NA      | NA      | SJC_S003705 | NA    | NA    | NA | Sjp_0099950.1 | NA                               | NA       |
| unknown      | NA | NA      | NA      | SJC_S003706 | NA    | NA    | NA | Sjp_0099960.1 | NA                               | NA       |
| unknown      | NA | NA      | NA      | SJC_S003712 | NA    | NA    | NA | Sjp_0099970.1 | NA                               | NA       |
| unknown      | NA | NA      | NA      | SJC_S003713 | NA    | NA    | NA | Sjp_0099980.1 | NA                               | NA       |
| unknown      | NA | NA      | NA      | SJC_S003713 | NA    | NA    | NA | Sjp_0099990.1 | NA                               | NA       |
| unknown      | NA | NA      | NA      | SJC_S003713 | NA    | NA    | NA | Sjp_0100000.1 | transcription regulator activity | NA       |
| unknown      | NA | NA      | NA      | SJC_S003714 | NA    | NA    | NA | Sjp_0100010.1 | NA                               | NA       |
| unknown      | NA | NA      | NA      | SJC_S003714 | NA    | NA    | NA | Sjp_0100020.1 | biological regulation            | 0.76396  |
| unknown      | NA | NA      | NA      | SJC_S003715 | NA    | NA    | NA | Sjp_0100030.1 | NA                               | NA       |
| unknown      | NA | NA      | NA      | SJC_S003716 | NA    | NA    | NA | Sjp_0100040.1 | NA                               | NA       |
| unknown      | NA | NA      | NA      | SJC_S003716 | NA    | NA    | NA | Sjp_0100050.1 | NA                               | NA       |
| unknown      | NA | NA      | NA      | SJC_S003719 | NA    | NA    | NA | Sjp_0100060.1 | cellular process                 | 0.63852  |
| unknown      | NA | NA      | NA      | SJC_S003720 | NA    | NA    | NA | Sjp_0100070.1 | binding                          | 0.052762 |
| unknown      | NA | NA      | NA      | SJC_S003721 | NA    | NA    | NA | Sjp_0100080.1 | biological regulation            | 0.76396  |
| unknown      | NA | NA      | NA      | SJC_S003722 | NA    | NA    | NA | Sjp_0100090.1 | NA                               | NA       |

|              |    |          |          |             |      |       |    |               |                                               |          |
|--------------|----|----------|----------|-------------|------|-------|----|---------------|-----------------------------------------------|----------|
| unknown      | NA | NA       | NA       | SJC_S003724 | NA   | NA    | NA | Sjp_0100100.1 | molecular transducer activity                 | 0.50162  |
| HSB10kb_1350 | WZ | 15818306 | 15845224 | SJC_S003725 | 4450 | 19477 | -  | Sjp_0100110.1 | catalytic activity                            | 0.035844 |
| HSB10kb_1350 | WZ | 15818306 | 15845224 | SJC_S003725 | 4450 | 19477 | -  | Sjp_0100120.1 | catalytic activity                            | 0.035844 |
| unknown      | NA | NA       | NA       | SJC_S003726 | NA   | NA    | NA | Sjp_0100130.1 | cellular process                              | 0.63852  |
| unknown      | NA | NA       | NA       | SJC_S003727 | NA   | NA    | NA | Sjp_0100140.1 | catalytic activity                            | 0.035844 |
| unknown      | NA | NA       | NA       | SJC_S003727 | NA   | NA    | NA | Sjp_0100150.1 | binding                                       | 0.052762 |
| unknown      | NA | NA       | NA       | SJC_S003728 | NA   | NA    | NA | Sjp_0100160.1 | electron carrier activity                     | NA       |
| unknown      | NA | NA       | NA       | SJC_S003728 | NA   | NA    | NA | Sjp_0100170.1 | NA                                            | NA       |
| unknown      | NA | NA       | NA       | SJC_S003730 | NA   | NA    | NA | Sjp_0100180.1 | NA                                            | NA       |
| HSB10kb_1351 | 2  | 28640542 | 28661008 | SJC_S003732 | 1727 | 15758 | +  | Sjp_0100190.1 | NA                                            | NA       |
| unknown      | NA | NA       | NA       | SJC_S003733 | NA   | NA    | NA | Sjp_0100200.1 | binding                                       | 0.052762 |
| unknown      | NA | NA       | NA       | SJC_S003735 | NA   | NA    | NA | Sjp_0100210.1 | NA                                            | NA       |
| unknown      | NA | NA       | NA       | SJC_S003735 | NA   | NA    | NA | Sjp_0100220.1 | binding                                       | 0.052762 |
| unknown      | NA | NA       | NA       | SJC_S003736 | NA   | NA    | NA | Sjp_0100230.1 | binding                                       | 0.052762 |
| unknown      | NA | NA       | NA       | SJC_S003739 | NA   | NA    | NA | Sjp_0100240.1 | NA                                            | NA       |
| unknown      | NA | NA       | NA       | SJC_S003740 | NA   | NA    | NA | Sjp_0100250.1 | NA                                            | NA       |
| unknown      | NA | NA       | NA       | SJC_S003742 | NA   | NA    | NA | Sjp_0100260.1 | NA                                            | NA       |
| unknown      | NA | NA       | NA       | SJC_S003743 | NA   | NA    | NA | Sjp_0100270.1 | binding                                       | 0.052762 |
| unknown      | NA | NA       | NA       | SJC_S003743 | NA   | NA    | NA | Sjp_0100280.1 | cellular component organization or biogenesis | NA       |
| unknown      | NA | NA       | NA       | SJC_S003744 | NA   | NA    | NA | Sjp_0100290.1 | catalytic activity                            | 0.035844 |
| unknown      | NA | NA       | NA       | SJC_S003745 | NA   | NA    | NA | Sjp_0100300.1 | NA                                            | NA       |
| unknown      | NA | NA       | NA       | SJC_S003747 | NA   | NA    | NA | Sjp_0100310.1 | NA                                            | NA       |
| unknown      | NA | NA       | NA       | SJC_S003748 | NA   | NA    | NA | Sjp_0100320.1 | cell part                                     | 0.009037 |
| unknown      | NA | NA       | NA       | SJC_S003749 | NA   | NA    | NA | Sjp_0100330.1 | NA                                            | NA       |
| unknown      | NA | NA       | NA       | SJC_S003751 | NA   | NA    | NA | Sjp_0100340.1 | cell part                                     | 0.009037 |
| unknown      | NA | NA       | NA       | SJC_S003752 | NA   | NA    | NA | Sjp_0100350.1 | binding                                       | 0.052762 |
| unknown      | NA | NA       | NA       | SJC_S003752 | NA   | NA    | NA | Sjp_0100360.1 | NA                                            | NA       |
| unknown      | NA | NA       | NA       | SJC_S003753 | NA   | NA    | NA | Sjp_0100370.1 | NA                                            | NA       |

|              |    |          |          |             |       |       |    |               |                                               |          |
|--------------|----|----------|----------|-------------|-------|-------|----|---------------|-----------------------------------------------|----------|
| unknown      | NA | NA       | NA       | SJC_S003754 | NA    | NA    | NA | Sjp_0100380.1 | NA                                            | NA       |
| unknown      | NA | NA       | NA       | SJC_S003755 | NA    | NA    | NA | Sjp_0100390.1 | NA                                            | NA       |
| unknown      | NA | NA       | NA       | SJC_S003755 | NA    | NA    | NA | Sjp_0100400.1 | NA                                            | NA       |
| unknown      | NA | NA       | NA       | SJC_S003756 | NA    | NA    | NA | Sjp_0100410.1 | cellular component organization or biogenesis | NA       |
| unknown      | NA | NA       | NA       | SJC_S003757 | NA    | NA    | NA | Sjp_0100420.1 | NA                                            | NA       |
| HSB10kb_1352 | 1  | 28234397 | 28253349 | SJC_S003758 | 5253  | 18202 | +  | Sjp_0100430.1 | catalytic activity                            | 0.035844 |
| unknown      | NA | NA       | NA       | SJC_S003759 | NA    | NA    | NA | Sjp_0100440.1 | NA                                            | NA       |
| unknown      | NA | NA       | NA       | SJC_S003760 | NA    | NA    | NA | Sjp_0100450.1 | NA                                            | NA       |
| unknown      | NA | NA       | NA       | SJC_S003760 | NA    | NA    | NA | Sjp_0100460.1 | binding                                       | 0.052762 |
| unknown      | NA | NA       | NA       | SJC_S003761 | NA    | NA    | NA | Sjp_0100470.1 | biological regulation                         | 0.76396  |
| unknown      | NA | NA       | NA       | SJC_S003763 | NA    | NA    | NA | Sjp_0100480.1 | biological regulation                         | 0.76396  |
| unknown      | NA | NA       | NA       | SJC_S003764 | NA    | NA    | NA | Sjp_0100490.1 | NA                                            | NA       |
| HSB10kb_1353 | 3  | 25531532 | 25550410 | SJC_S003764 | 12530 | 32187 | -  | Sjp_0100500.1 | catalytic activity                            | 0.035844 |
| unknown      | NA | NA       | NA       | SJC_S003765 | NA    | NA    | NA | Sjp_0100510.1 | cell part                                     | 0.009037 |
| unknown      | NA | NA       | NA       | SJC_S003766 | NA    | NA    | NA | Sjp_0100520.1 | NA                                            | NA       |
| unknown      | NA | NA       | NA       | SJC_S003768 | NA    | NA    | NA | Sjp_0100530.1 | NA                                            | NA       |
| unknown      | NA | NA       | NA       | SJC_S003768 | NA    | NA    | NA | Sjp_0100540.1 | NA                                            | NA       |
| unknown      | NA | NA       | NA       | SJC_S003769 | NA    | NA    | NA | Sjp_0100550.1 | cell part                                     | 0.009037 |
| unknown      | NA | NA       | NA       | SJC_S003771 | NA    | NA    | NA | Sjp_0100560.1 | NA                                            | NA       |
| unknown      | NA | NA       | NA       | SJC_S003771 | NA    | NA    | NA | Sjp_0100570.1 | biological regulation                         | 0.76396  |
| unknown      | NA | NA       | NA       | SJC_S003772 | NA    | NA    | NA | Sjp_0100580.1 | NA                                            | NA       |
| unknown      | NA | NA       | NA       | SJC_S003774 | NA    | NA    | NA | Sjp_0100590.1 | binding                                       | 0.052762 |
| unknown      | NA | NA       | NA       | SJC_S003774 | NA    | NA    | NA | Sjp_0100600.1 | NA                                            | NA       |
| unknown      | NA | NA       | NA       | SJC_S003774 | NA    | NA    | NA | Sjp_0100610.1 | NA                                            | NA       |
| unknown      | NA | NA       | NA       | SJC_S003776 | NA    | NA    | NA | Sjp_0100620.1 | NA                                            | NA       |
| unknown      | NA | NA       | NA       | SJC_S003777 | NA    | NA    | NA | Sjp_0100630.1 | NA                                            | NA       |
| unknown      | NA | NA       | NA       | SJC_S003779 | NA    | NA    | NA | Sjp_0100640.1 | enzyme regulator                              | 0.1755   |

|         |    |    |    |             |    |    |    |               |                           |          |
|---------|----|----|----|-------------|----|----|----|---------------|---------------------------|----------|
|         |    |    |    |             |    |    |    |               | activity                  |          |
| unknown | NA | NA | NA | SJC_S003780 | NA | NA | NA | Sjp_0100650.1 | NA                        | NA       |
| unknown | NA | NA | NA | SJC_S003782 | NA | NA | NA | Sjp_0100660.1 | metabolic process         | 0.41934  |
| unknown | NA | NA | NA | SJC_S003783 | NA | NA | NA | Sjp_0100670.1 | metabolic process         | 0.41934  |
| unknown | NA | NA | NA | SJC_S003786 | NA | NA | NA | Sjp_0100680.1 | NA                        | NA       |
| unknown | NA | NA | NA | SJC_S003792 | NA | NA | NA | Sjp_0100690.1 | NA                        | NA       |
| unknown | NA | NA | NA | SJC_S003796 | NA | NA | NA | Sjp_0100700.1 | NA                        | NA       |
| unknown | NA | NA | NA | SJC_S003797 | NA | NA | NA | Sjp_0100710.1 | NA                        | NA       |
| unknown | NA | NA | NA | SJC_S003798 | NA | NA | NA | Sjp_0100720.1 | biological regulation     | 0.76396  |
| unknown | NA | NA | NA | SJC_S003798 | NA | NA | NA | Sjp_0100730.1 | enzyme regulator activity | 0.1755   |
| unknown | NA | NA | NA | SJC_S003800 | NA | NA | NA | Sjp_0100740.1 | catalytic activity        | 0.035844 |
| unknown | NA | NA | NA | SJC_S003801 | NA | NA | NA | Sjp_0100750.1 | NA                        | NA       |
| unknown | NA | NA | NA | SJC_S003801 | NA | NA | NA | Sjp_0100760.1 | NA                        | NA       |
| unknown | NA | NA | NA | SJC_S003803 | NA | NA | NA | Sjp_0100770.1 | cell part                 | 0.009037 |
| unknown | NA | NA | NA | SJC_S003804 | NA | NA | NA | Sjp_0100780.1 | NA                        | NA       |
| unknown | NA | NA | NA | SJC_S003805 | NA | NA | NA | Sjp_0100790.1 | NA                        | NA       |
| unknown | NA | NA | NA | SJC_S003806 | NA | NA | NA | Sjp_0100800.1 | NA                        | NA       |
| unknown | NA | NA | NA | SJC_S003808 | NA | NA | NA | Sjp_0100810.1 | NA                        | NA       |
| unknown | NA | NA | NA | SJC_S003809 | NA | NA | NA | Sjp_0100820.1 | catalytic activity        | 0.035844 |
| unknown | NA | NA | NA | SJC_S003810 | NA | NA | NA | Sjp_0100830.1 | NA                        | NA       |
| unknown | NA | NA | NA | SJC_S003811 | NA | NA | NA | Sjp_0100840.1 | binding                   | 0.052762 |
| unknown | NA | NA | NA | SJC_S003813 | NA | NA | NA | Sjp_0100850.1 | NA                        | NA       |
| unknown | NA | NA | NA | SJC_S003815 | NA | NA | NA | Sjp_0100860.1 | NA                        | NA       |
| unknown | NA | NA | NA | SJC_S003817 | NA | NA | NA | Sjp_0100870.1 | NA                        | NA       |
| unknown | NA | NA | NA | SJC_S003817 | NA | NA | NA | Sjp_0100880.1 | NA                        | NA       |
| unknown | NA | NA | NA | SJC_S003820 | NA | NA | NA | Sjp_0100890.1 | NA                        | NA       |
| unknown | NA | NA | NA | SJC_S003820 | NA | NA | NA | Sjp_0100900.1 | catalytic activity        | 0.035844 |
| unknown | NA | NA | NA | SJC_S003821 | NA | NA | NA | Sjp_0100910.1 | binding                   | 0.052762 |
| unknown | NA | NA | NA | SJC_S003822 | NA | NA | NA | Sjp_0100920.1 | NA                        | NA       |



|              |    |         |         |             |      |       |    |               |                                  |          |
|--------------|----|---------|---------|-------------|------|-------|----|---------------|----------------------------------|----------|
| unknown      | NA | NA      | NA      | SJC_S003824 | NA   | NA    | NA | Sjp_0100930.1 | NA                               | NA       |
| unknown      | NA | NA      | NA      | SJC_S003825 | NA   | NA    | NA | Sjp_0100940.1 | catalytic activity               | 0.035844 |
| unknown      | NA | NA      | NA      | SJC_S003827 | NA   | NA    | NA | Sjp_0100950.1 | NA                               | NA       |
| unknown      | NA | NA      | NA      | SJC_S003827 | NA   | NA    | NA | Sjp_0100960.1 | NA                               | NA       |
| HSB10kb_1354 | 6  | 3293380 | 3308838 | SJC_S003828 | 6166 | 24735 | -  | Sjp_0100970.1 | transcription regulator activity | NA       |
| HSB10kb_1354 | 6  | 3293380 | 3308838 | SJC_S003828 | 6166 | 24735 | -  | Sjp_0100980.1 | cell proliferation               | NA       |
| unknown      | NA | NA      | NA      | SJC_S003829 | NA   | NA    | NA | Sjp_0100990.1 | catalytic activity               | 0.035844 |
| unknown      | NA | NA      | NA      | SJC_S003830 | NA   | NA    | NA | Sjp_0101000.1 | NA                               | NA       |
| unknown      | NA | NA      | NA      | SJC_S003830 | NA   | NA    | NA | Sjp_0101010.1 | structural molecule activity     | NA       |
| unknown      | NA | NA      | NA      | SJC_S003832 | NA   | NA    | NA | Sjp_0101020.1 | NA                               | NA       |
| unknown      | NA | NA      | NA      | SJC_S003835 | NA   | NA    | NA | Sjp_0101030.1 | cell part                        | 0.009037 |
| unknown      | NA | NA      | NA      | SJC_S003836 | NA   | NA    | NA | Sjp_0101040.1 | NA                               | NA       |
| unknown      | NA | NA      | NA      | SJC_S003837 | NA   | NA    | NA | Sjp_0101050.1 | NA                               | NA       |
| unknown      | NA | NA      | NA      | SJC_S003840 | NA   | NA    | NA | Sjp_0101060.1 | NA                               | NA       |
| unknown      | NA | NA      | NA      | SJC_S003842 | NA   | NA    | NA | Sjp_0101070.1 | NA                               | NA       |
| unknown      | NA | NA      | NA      | SJC_S003843 | NA   | NA    | NA | Sjp_0101080.1 | binding                          | 0.052762 |
| unknown      | NA | NA      | NA      | SJC_S003848 | NA   | NA    | NA | Sjp_0101090.1 | molecular transducer activity    | 0.50162  |
| unknown      | NA | NA      | NA      | SJC_S003849 | NA   | NA    | NA | Sjp_0101100.1 | NA                               | NA       |
| unknown      | NA | NA      | NA      | SJC_S003853 | NA   | NA    | NA | Sjp_0101110.1 | catalytic activity               | 0.035844 |
| unknown      | NA | NA      | NA      | SJC_S003857 | NA   | NA    | NA | Sjp_0101120.1 | catalytic activity               | 0.035844 |
| unknown      | NA | NA      | NA      | SJC_S003860 | NA   | NA    | NA | Sjp_0101130.1 | NA                               | NA       |
| unknown      | NA | NA      | NA      | SJC_S003861 | NA   | NA    | NA | Sjp_0101140.1 | NA                               | NA       |
| unknown      | NA | NA      | NA      | SJC_S003863 | NA   | NA    | NA | Sjp_0101150.1 | NA                               | NA       |
| unknown      | NA | NA      | NA      | SJC_S003864 | NA   | NA    | NA | Sjp_0101160.1 | NA                               | NA       |
| unknown      | NA | NA      | NA      | SJC_S003865 | NA   | NA    | NA | Sjp_0101170.1 | NA                               | NA       |
| unknown      | NA | NA      | NA      | SJC_S003866 | NA   | NA    | NA | Sjp_0101180.1 | NA                               | NA       |
| unknown      | NA | NA      | NA      | SJC_S003868 | NA   | NA    | NA | Sjp_0101190.1 | NA                               | NA       |

|              |    |          |          |             |      |       |    |               |                           |          |
|--------------|----|----------|----------|-------------|------|-------|----|---------------|---------------------------|----------|
| unknown      | NA | NA       | NA       | SJC_S003870 | NA   | NA    | NA | Sjp_0101200.1 | NA                        | NA       |
| unknown      | NA | NA       | NA       | SJC_S003870 | NA   | NA    | NA | Sjp_0101210.1 | NA                        | NA       |
| unknown      | NA | NA       | NA       | SJC_S003871 | NA   | NA    | NA | Sjp_0101220.1 | NA                        | NA       |
| unknown      | NA | NA       | NA       | SJC_S003872 | NA   | NA    | NA | Sjp_0101230.1 | NA                        | NA       |
| unknown      | NA | NA       | NA       | SJC_S003874 | NA   | NA    | NA | Sjp_0101240.1 | NA                        | NA       |
| unknown      | NA | NA       | NA       | SJC_S003876 | NA   | NA    | NA | Sjp_0101250.1 | cell part                 | 0.009037 |
| unknown      | NA | NA       | NA       | SJC_S003878 | NA   | NA    | NA | Sjp_0101270.1 | catalytic activity        | 0.035844 |
| unknown      | NA | NA       | NA       | SJC_S003879 | NA   | NA    | NA | Sjp_0101280.1 | NA                        | NA       |
| unknown      | NA | NA       | NA       | SJC_S003880 | NA   | NA    | NA | Sjp_0101290.1 | NA                        | NA       |
| unknown      | NA | NA       | NA       | SJC_S003880 | NA   | NA    | NA | Sjp_0101300.1 | NA                        | NA       |
| unknown      | NA | NA       | NA       | SJC_S003883 | NA   | NA    | NA | Sjp_0101310.1 | binding                   | 0.052762 |
| unknown      | NA | NA       | NA       | SJC_S003883 | NA   | NA    | NA | Sjp_0101320.1 | NA                        | NA       |
| unknown      | NA | NA       | NA       | SJC_S003885 | NA   | NA    | NA | Sjp_0101330.1 | NA                        | NA       |
| unknown      | NA | NA       | NA       | SJC_S003886 | NA   | NA    | NA | Sjp_0101340.1 | NA                        | NA       |
| unknown      | NA | NA       | NA       | SJC_S003887 | NA   | NA    | NA | Sjp_0101350.1 | binding                   | 0.052762 |
| unknown      | NA | NA       | NA       | SJC_S003888 | NA   | NA    | NA | Sjp_0101360.1 | NA                        | NA       |
| HSB10kb_1355 | 1  | 42063162 | 42088524 | SJC_S003889 | 1172 | 12918 | +  | Sjp_0101370.1 | enzyme regulator activity | 0.1755   |
| unknown      | NA | NA       | NA       | SJC_S003890 | NA   | NA    | NA | Sjp_0101380.1 | NA                        | NA       |
| unknown      | NA | NA       | NA       | SJC_S003891 | NA   | NA    | NA | Sjp_0101390.1 | NA                        | NA       |
| unknown      | NA | NA       | NA       | SJC_S003892 | NA   | NA    | NA | Sjp_0101410.1 | biological regulation     | 0.76396  |
| unknown      | NA | NA       | NA       | SJC_S003893 | NA   | NA    | NA | Sjp_0101420.1 | NA                        | NA       |
| unknown      | NA | NA       | NA       | SJC_S003894 | NA   | NA    | NA | Sjp_0101430.1 | NA                        | NA       |
| unknown      | NA | NA       | NA       | SJC_S003895 | NA   | NA    | NA | Sjp_0101440.1 | NA                        | NA       |
| unknown      | NA | NA       | NA       | SJC_S003896 | NA   | NA    | NA | Sjp_0101450.1 | NA                        | NA       |
| unknown      | NA | NA       | NA       | SJC_S003898 | NA   | NA    | NA | Sjp_0101460.1 | NA                        | NA       |
| unknown      | NA | NA       | NA       | SJC_S003900 | NA   | NA    | NA | Sjp_0101470.1 | NA                        | NA       |
| unknown      | NA | NA       | NA       | SJC_S003901 | NA   | NA    | NA | Sjp_0101480.1 | NA                        | NA       |
| unknown      | NA | NA       | NA       | SJC_S003903 | NA   | NA    | NA | Sjp_0101490.1 | NA                        | NA       |
| unknown      | NA | NA       | NA       | SJC_S003909 | NA   | NA    | NA | Sjp_0101500.1 | NA                        | NA       |
| unknown      | NA | NA       | NA       | SJC_S003916 | NA   | NA    | NA | Sjp_0101510.1 | NA                        | NA       |
| unknown      | NA | NA       | NA       | SJC_S003917 | NA   | NA    | NA | Sjp_0101520.1 | NA                        | NA       |

|         |    |    |    |             |    |    |    |               |                           |          |
|---------|----|----|----|-------------|----|----|----|---------------|---------------------------|----------|
| unknown | NA | NA | NA | SJC_S003919 | NA | NA | NA | Sjp_0101530.1 | NA                        | NA       |
| unknown | NA | NA | NA | SJC_S003919 | NA | NA | NA | Sjp_0101540.1 | NA                        | NA       |
| unknown | NA | NA | NA | SJC_S003921 | NA | NA | NA | Sjp_0101550.1 | cell part                 | 0.009037 |
| unknown | NA | NA | NA | SJC_S003924 | NA | NA | NA | Sjp_0101560.1 | NA                        | NA       |
| unknown | NA | NA | NA | SJC_S003928 | NA | NA | NA | Sjp_0101570.1 | NA                        | NA       |
| unknown | NA | NA | NA | SJC_S003929 | NA | NA | NA | Sjp_0101580.1 | NA                        | NA       |
| unknown | NA | NA | NA | SJC_S003930 | NA | NA | NA | Sjp_0101590.1 | NA                        | NA       |
| unknown | NA | NA | NA | SJC_S003935 | NA | NA | NA | Sjp_0101600.1 | NA                        | NA       |
| unknown | NA | NA | NA | SJC_S003938 | NA | NA | NA | Sjp_0101610.1 | NA                        | NA       |
| unknown | NA | NA | NA | SJC_S003943 | NA | NA | NA | Sjp_0101620.1 | NA                        | NA       |
| unknown | NA | NA | NA | SJC_S003944 | NA | NA | NA | Sjp_0101630.1 | NA                        | NA       |
| unknown | NA | NA | NA | SJC_S003944 | NA | NA | NA | Sjp_0101640.1 | catalytic activity        | 0.035844 |
| unknown | NA | NA | NA | SJC_S003946 | NA | NA | NA | Sjp_0101650.1 | catalytic activity        | 0.035844 |
| unknown | NA | NA | NA | SJC_S003948 | NA | NA | NA | Sjp_0101660.1 | NA                        | NA       |
| unknown | NA | NA | NA | SJC_S003953 | NA | NA | NA | Sjp_0101670.1 | enzyme regulator activity | 0.1755   |
| unknown | NA | NA | NA | SJC_S003956 | NA | NA | NA | Sjp_0101680.1 | NA                        | NA       |
| unknown | NA | NA | NA | SJC_S003957 | NA | NA | NA | Sjp_0101690.1 | NA                        | NA       |
| unknown | NA | NA | NA | SJC_S003960 | NA | NA | NA | Sjp_0101700.1 | binding                   | 0.052762 |
| unknown | NA | NA | NA | SJC_S003961 | NA | NA | NA | Sjp_0101710.1 | NA                        | NA       |
| unknown | NA | NA | NA | SJC_S003962 | NA | NA | NA | Sjp_0101720.1 | NA                        | NA       |
| unknown | NA | NA | NA | SJC_S003963 | NA | NA | NA | Sjp_0101730.1 | NA                        | NA       |
| unknown | NA | NA | NA | SJC_S003964 | NA | NA | NA | Sjp_0101740.1 | binding                   | 0.052762 |
| unknown | NA | NA | NA | SJC_S003965 | NA | NA | NA | Sjp_0101750.1 | transporter activity      | 0.782    |
| unknown | NA | NA | NA | SJC_S003965 | NA | NA | NA | Sjp_0101760.1 | transporter activity      | 0.782    |
| unknown | NA | NA | NA | SJC_S003966 | NA | NA | NA | Sjp_0101770.1 | NA                        | NA       |
| unknown | NA | NA | NA | SJC_S003967 | NA | NA | NA | Sjp_0101780.1 | NA                        | NA       |
| unknown | NA | NA | NA | SJC_S003968 | NA | NA | NA | Sjp_0101790.1 | NA                        | NA       |
| unknown | NA | NA | NA | SJC_S003970 | NA | NA | NA | Sjp_0101800.1 | cell part                 | 0.009037 |
| unknown | NA | NA | NA | SJC_S003972 | NA | NA | NA | Sjp_0101810.1 | cellular process          | 0.63852  |
| unknown | NA | NA | NA | SJC_S003973 | NA | NA | NA | Sjp_0101820.1 | NA                        | NA       |

|              |    |          |          |             |       |        |    |               |                       |          |
|--------------|----|----------|----------|-------------|-------|--------|----|---------------|-----------------------|----------|
| unknown      | NA | NA       | NA       | SJC_S003973 | NA    | NA     | NA | Sjp_0101830.1 | NA                    | NA       |
| unknown      | NA | NA       | NA       | SJC_S003973 | NA    | NA     | NA | Sjp_0101840.1 | NA                    | NA       |
| unknown      | NA | NA       | NA       | SJC_S003974 | NA    | NA     | NA | Sjp_0101850.1 | NA                    | NA       |
| unknown      | NA | NA       | NA       | SJC_S003975 | NA    | NA     | NA | Sjp_0101860.1 | binding               | 0.052762 |
| unknown      | NA | NA       | NA       | SJC_S003975 | NA    | NA     | NA | Sjp_0101870.1 | NA                    | NA       |
| unknown      | NA | NA       | NA       | SJC_S003979 | NA    | NA     | NA | Sjp_0101890.1 | biological regulation | 0.76396  |
| unknown      | NA | NA       | NA       | SJC_S003980 | NA    | NA     | NA | Sjp_0101900.1 | NA                    | NA       |
| unknown      | NA | NA       | NA       | SJC_S003981 | NA    | NA     | NA | Sjp_0101920.1 | NA                    | NA       |
| unknown      | NA | NA       | NA       | SJC_S003981 | NA    | NA     | NA | Sjp_0101930.1 | NA                    | NA       |
| unknown      | NA | NA       | NA       | SJC_S003982 | NA    | NA     | NA | Sjp_0101940.1 | cellular process      | 0.63852  |
| unknown      | NA | NA       | NA       | SJC_S003982 | NA    | NA     | NA | Sjp_0101950.1 | NA                    | NA       |
| unknown      | NA | NA       | NA       | SJC_S003983 | NA    | NA     | NA | Sjp_0101960.1 | cell part             | 0.009037 |
| HSB10kb_1356 | WZ | 21236164 | 21252348 | SJC_S003983 | 6088  | 21935  | +  | Sjp_0101970.1 | NA                    | NA       |
| HSB10kb_1356 | WZ | 21236164 | 21252348 | SJC_S003983 | 6088  | 21935  | +  | Sjp_0101980.1 | NA                    | NA       |
| unknown      | NA | NA       | NA       | SJC_S003984 | NA    | NA     | NA | Sjp_0101990.1 | NA                    | NA       |
| HSB10kb_1357 | 2  | 33100470 | 33127143 | SJC_S003985 | 94933 | 129263 | -  | Sjp_0102000.1 | NA                    | NA       |
| HSB10kb_1357 | 2  | 33100470 | 33127143 | SJC_S003985 | 94933 | 129263 | -  | Sjp_0102010.1 | NA                    | NA       |
| unknown      | NA | NA       | NA       | SJC_S003986 | NA    | NA     | NA | Sjp_0102020.1 | NA                    | NA       |
| HSB10kb_1358 | 6  | 1633402  | 1643829  | SJC_S003987 | 27108 | 41149  | -  | Sjp_0102030.1 | NA                    | NA       |
| unknown      | NA | NA       | NA       | SJC_S003988 | NA    | NA     | NA | Sjp_0102040.1 | NA                    | NA       |
| unknown      | NA | NA       | NA       | SJC_S003990 | NA    | NA     | NA | Sjp_0102050.1 | NA                    | NA       |
| unknown      | NA | NA       | NA       | SJC_S003991 | NA    | NA     | NA | Sjp_0102060.1 | NA                    | NA       |
| unknown      | NA | NA       | NA       | SJC_S003992 | NA    | NA     | NA | Sjp_0102070.1 | NA                    | NA       |
| unknown      | NA | NA       | NA       | SJC_S003992 | NA    | NA     | NA | Sjp_0102080.1 | NA                    | NA       |
| unknown      | NA | NA       | NA       | SJC_S003993 | NA    | NA     | NA | Sjp_0102090.1 | NA                    | NA       |
| unknown      | NA | NA       | NA       | SJC_S003993 | NA    | NA     | NA | Sjp_0102100.1 | NA                    | NA       |
| unknown      | NA | NA       | NA       | SJC_S003993 | NA    | NA     | NA | Sjp_0102110.1 | NA                    | NA       |
| unknown      | NA | NA       | NA       | SJC_S003994 | NA    | NA     | NA | Sjp_0102120.1 | NA                    | NA       |
| unknown      | NA | NA       | NA       | SJC_S003994 | NA    | NA     | NA | Sjp_0102130.1 | NA                    | NA       |
| unknown      | NA | NA       | NA       | SJC_S003994 | NA    | NA     | NA | Sjp_0102140.1 | NA                    | NA       |
| unknown      | NA | NA       | NA       | SJC_S003994 | NA    | NA     | NA | Sjp_0102150.1 | binding               | 0.052762 |
| HSB10kb_1359 | 2  | 5459230  | 5484674  | SJC_S003995 | 3385  | 20685  | -  | Sjp_0102160.1 | NA                    | NA       |
| unknown      | NA | NA       | NA       | SJC_S003997 | NA    | NA     | NA | Sjp_0102180.1 | metabolic             | 0.41934  |

|              |    |          |          |             |      |       |    |               |                       |          |
|--------------|----|----------|----------|-------------|------|-------|----|---------------|-----------------------|----------|
|              |    |          |          |             |      |       |    |               | process               |          |
| unknown      | NA | NA       | NA       | SJC_S003998 | NA   | NA    | NA | Sjp_0102190.1 | NA                    | NA       |
| unknown      | NA | NA       | NA       | SJC_S004000 | NA   | NA    | NA | Sjp_0102200.1 | cell part             | 0.009037 |
| unknown      | NA | NA       | NA       | SJC_S004001 | NA   | NA    | NA | Sjp_0102210.1 | cell part             | 0.009037 |
| unknown      | NA | NA       | NA       | SJC_S004002 | NA   | NA    | NA | Sjp_0102220.1 | NA                    | NA       |
| unknown      | NA | NA       | NA       | SJC_S004003 | NA   | NA    | NA | Sjp_0102230.1 | NA                    | NA       |
| unknown      | NA | NA       | NA       | SJC_S004003 | NA   | NA    | NA | Sjp_0102240.1 | NA                    | NA       |
| unknown      | NA | NA       | NA       | SJC_S004003 | NA   | NA    | NA | Sjp_0102250.1 | NA                    | NA       |
| unknown      | NA | NA       | NA       | SJC_S004004 | NA   | NA    | NA | Sjp_0102260.1 | NA                    | NA       |
| unknown      | NA | NA       | NA       | SJC_S004005 | NA   | NA    | NA | Sjp_0102270.1 | NA                    | NA       |
| unknown      | NA | NA       | NA       | SJC_S004005 | NA   | NA    | NA | Sjp_0102280.1 | NA                    | NA       |
| unknown      | NA | NA       | NA       | SJC_S004006 | NA   | NA    | NA | Sjp_0102290.1 | metabolic process     | 0.41934  |
| unknown      | NA | NA       | NA       | SJC_S004006 | NA   | NA    | NA | Sjp_0102300.1 | NA                    | NA       |
| HSB10kb_1360 | 1  | 30772164 | 30846012 | SJC_S004007 | 4480 | 67344 | -  | Sjp_0102310.1 | NA                    | NA       |
| HSB10kb_1360 | 1  | 30772164 | 30846012 | SJC_S004007 | 4480 | 67344 | -  | Sjp_0102320.1 | NA                    | NA       |
| HSB10kb_1360 | 1  | 30772164 | 30846012 | SJC_S004007 | 4480 | 67344 | -  | Sjp_0102330.1 | NA                    | NA       |
| unknown      | NA | NA       | NA       | SJC_S004008 | NA   | NA    | NA | Sjp_0102340.1 | NA                    | NA       |
| unknown      | NA | NA       | NA       | SJC_S004009 | NA   | NA    | NA | Sjp_0102350.1 | NA                    | NA       |
| unknown      | NA | NA       | NA       | SJC_S004009 | NA   | NA    | NA | Sjp_0102360.1 | NA                    | NA       |
| unknown      | NA | NA       | NA       | SJC_S004013 | NA   | NA    | NA | Sjp_0102370.1 | immune system process | NA       |
| unknown      | NA | NA       | NA       | SJC_S004015 | NA   | NA    | NA | Sjp_0102380.1 | NA                    | NA       |
| unknown      | NA | NA       | NA       | SJC_S004016 | NA   | NA    | NA | Sjp_0102390.1 | cellular process      | 0.63852  |
| HSB10kb_1361 | 4  | 13027260 | 13115392 | SJC_S004017 | 4351 | 71379 | +  | Sjp_0102400.1 | NA                    | NA       |
| HSB10kb_1361 | 4  | 13027260 | 13115392 | SJC_S004017 | 4351 | 71379 | +  | Sjp_0102410.1 | cell part             | 0.009037 |
| unknown      | NA | NA       | NA       | SJC_S004021 | NA   | NA    | NA | Sjp_0102420.1 | NA                    | NA       |
| unknown      | NA | NA       | NA       | SJC_S004022 | NA   | NA    | NA | Sjp_0102430.1 | biological regulation | 0.76396  |
| unknown      | NA | NA       | NA       | SJC_S004023 | NA   | NA    | NA | Sjp_0102440.1 | NA                    | NA       |
| unknown      | NA | NA       | NA       | SJC_S004024 | NA   | NA    | NA | Sjp_0102450.1 | catalytic activity    | 0.035844 |
| unknown      | NA | NA       | NA       | SJC_S004027 | NA   | NA    | NA | Sjp_0102460.1 | NA                    | NA       |
| unknown      | NA | NA       | NA       | SJC_S004028 | NA   | NA    | NA | Sjp_0102470.1 | NA                    | NA       |
| unknown      | NA | NA       | NA       | SJC_S004029 | NA   | NA    | NA | Sjp_0102480.1 | NA                    | NA       |

|         |    |    |    |             |    |    |    |               |                       |          |
|---------|----|----|----|-------------|----|----|----|---------------|-----------------------|----------|
| unknown | NA | NA | NA | SJC_S004032 | NA | NA | NA | Sjp_0102490.1 | NA                    | NA       |
| unknown | NA | NA | NA | SJC_S004034 | NA | NA | NA | Sjp_0102500.1 | NA                    | NA       |
| unknown | NA | NA | NA | SJC_S004035 | NA | NA | NA | Sjp_0102510.1 | NA                    | NA       |
| unknown | NA | NA | NA | SJC_S004036 | NA | NA | NA | Sjp_0102520.1 | NA                    | NA       |
| unknown | NA | NA | NA | SJC_S004037 | NA | NA | NA | Sjp_0102530.1 | NA                    | NA       |
| unknown | NA | NA | NA | SJC_S004038 | NA | NA | NA | Sjp_0102540.1 | NA                    | NA       |
| unknown | NA | NA | NA | SJC_S004039 | NA | NA | NA | Sjp_0102550.1 | NA                    | NA       |
| unknown | NA | NA | NA | SJC_S004041 | NA | NA | NA | Sjp_0102560.1 | NA                    | NA       |
| unknown | NA | NA | NA | SJC_S004043 | NA | NA | NA | Sjp_0102570.1 | transporter activity  | 0.782    |
| unknown | NA | NA | NA | SJC_S004045 | NA | NA | NA | Sjp_0102580.1 | NA                    | NA       |
| unknown | NA | NA | NA | SJC_S004049 | NA | NA | NA | Sjp_0102590.1 | NA                    | NA       |
| unknown | NA | NA | NA | SJC_S004051 | NA | NA | NA | Sjp_0102600.1 | developmental process | NA       |
| unknown | NA | NA | NA | SJC_S004051 | NA | NA | NA | Sjp_0102610.1 | NA                    | NA       |
| unknown | NA | NA | NA | SJC_S004051 | NA | NA | NA | Sjp_0102620.1 | catalytic activity    | 0.035844 |
| unknown | NA | NA | NA | SJC_S004055 | NA | NA | NA | Sjp_0102630.1 | NA                    | NA       |
| unknown | NA | NA | NA | SJC_S004056 | NA | NA | NA | Sjp_0102640.1 | binding               | 0.052762 |
| unknown | NA | NA | NA | SJC_S004058 | NA | NA | NA | Sjp_0102650.1 | NA                    | NA       |
| unknown | NA | NA | NA | SJC_S004059 | NA | NA | NA | Sjp_0102660.1 | NA                    | NA       |
| unknown | NA | NA | NA | SJC_S004061 | NA | NA | NA | Sjp_0102670.1 | NA                    | NA       |
| unknown | NA | NA | NA | SJC_S004063 | NA | NA | NA | Sjp_0102690.1 | catalytic activity    | 0.035844 |
| unknown | NA | NA | NA | SJC_S004063 | NA | NA | NA | Sjp_0102700.1 | catalytic activity    | 0.035844 |
| unknown | NA | NA | NA | SJC_S004065 | NA | NA | NA | Sjp_0102710.1 | NA                    | NA       |
| unknown | NA | NA | NA | SJC_S004065 | NA | NA | NA | Sjp_0102720.1 | NA                    | NA       |
| unknown | NA | NA | NA | SJC_S004066 | NA | NA | NA | Sjp_0102730.1 | NA                    | NA       |
| unknown | NA | NA | NA | SJC_S004068 | NA | NA | NA | Sjp_0102740.1 | cell part             | 0.009037 |
| unknown | NA | NA | NA | SJC_S004068 | NA | NA | NA | Sjp_0102750.1 | catalytic activity    | 0.035844 |
| unknown | NA | NA | NA | SJC_S004068 | NA | NA | NA | Sjp_0102760.1 | NA                    | NA       |
| unknown | NA | NA | NA | SJC_S004068 | NA | NA | NA | Sjp_0102770.1 | NA                    | NA       |
| unknown | NA | NA | NA | SJC_S004069 | NA | NA | NA | Sjp_0102780.1 | NA                    | NA       |
| unknown | NA | NA | NA | SJC_S004069 | NA | NA | NA | Sjp_0102790.1 | NA                    | NA       |
| unknown | NA | NA | NA | SJC_S004069 | NA | NA | NA | Sjp_0102800.1 | binding               | 0.052762 |
| unknown | NA | NA | NA | SJC_S004072 | NA | NA | NA | Sjp_0102820.1 | NA                    | NA       |

|              |    |          |          |             |     |        |    |               |                           |          |
|--------------|----|----------|----------|-------------|-----|--------|----|---------------|---------------------------|----------|
| unknown      | NA | NA       | NA       | SJC_S004072 | NA  | NA     | NA | Sjp_0102830.1 | NA                        | NA       |
| unknown      | NA | NA       | NA       | SJC_S004072 | NA  | NA     | NA | Sjp_0102840.1 | NA                        | NA       |
| unknown      | NA | NA       | NA       | SJC_S004074 | NA  | NA     | NA | Sjp_0102850.1 | NA                        | NA       |
| unknown      | NA | NA       | NA       | SJC_S004076 | NA  | NA     | NA | Sjp_0102860.1 | NA                        | NA       |
| unknown      | NA | NA       | NA       | SJC_S004076 | NA  | NA     | NA | Sjp_0102870.1 | cell part                 | 0.009037 |
| unknown      | NA | NA       | NA       | SJC_S004076 | NA  | NA     | NA | Sjp_0102880.1 | cell part                 | 0.009037 |
| unknown      | NA | NA       | NA       | SJC_S004076 | NA  | NA     | NA | Sjp_0102890.1 | NA                        | NA       |
| unknown      | NA | NA       | NA       | SJC_S004077 | NA  | NA     | NA | Sjp_0102900.1 | catalytic activity        | 0.035844 |
| unknown      | NA | NA       | NA       | SJC_S004079 | NA  | NA     | NA | Sjp_0102910.1 | NA                        | NA       |
| unknown      | NA | NA       | NA       | SJC_S004079 | NA  | NA     | NA | Sjp_0102920.1 | cell part                 | 0.009037 |
| unknown      | NA | NA       | NA       | SJC_S004080 | NA  | NA     | NA | Sjp_0102930.1 | catalytic activity        | 0.035844 |
| unknown      | NA | NA       | NA       | SJC_S004081 | NA  | NA     | NA | Sjp_0102940.1 | catalytic activity        | 0.035844 |
| unknown      | NA | NA       | NA       | SJC_S004084 | NA  | NA     | NA | Sjp_0102950.1 | NA                        | NA       |
| unknown      | NA | NA       | NA       | SJC_S004087 | NA  | NA     | NA | Sjp_0102960.1 | biological regulation     | 0.76396  |
| unknown      | NA | NA       | NA       | SJC_S004087 | NA  | NA     | NA | Sjp_0102970.1 | cell part                 | 0.009037 |
| unknown      | NA | NA       | NA       | SJC_S004087 | NA  | NA     | NA | Sjp_0102980.1 | cell part                 | 0.009037 |
| unknown      | NA | NA       | NA       | SJC_S004088 | NA  | NA     | NA | Sjp_0102990.1 | NA                        | NA       |
| unknown      | NA | NA       | NA       | SJC_S004088 | NA  | NA     | NA | Sjp_0103000.1 | NA                        | NA       |
| unknown      | NA | NA       | NA       | SJC_S004089 | NA  | NA     | NA | Sjp_0103010.1 | NA                        | NA       |
| HSB10kb_1362 | WZ | 40911807 | 41037843 | SJC_S004090 | 786 | 125613 | +  | Sjp_0103020.1 | NA                        | NA       |
| HSB10kb_1362 | WZ | 40911807 | 41037843 | SJC_S004090 | 786 | 125613 | +  | Sjp_0103030.1 | NA                        | NA       |
| HSB10kb_1362 | WZ | 40911807 | 41037843 | SJC_S004090 | 786 | 125613 | +  | Sjp_0103040.1 | NA                        | NA       |
| HSB10kb_1362 | WZ | 40911807 | 41037843 | SJC_S004090 | 786 | 125613 | +  | Sjp_0103050.1 | cell part                 | 0.009037 |
| HSB10kb_1362 | WZ | 40911807 | 41037843 | SJC_S004090 | 786 | 125613 | +  | Sjp_0103060.1 | transporter activity      | 0.782    |
| unknown      | NA | NA       | NA       | SJC_S004091 | NA  | NA     | NA | Sjp_0103070.1 | electron carrier activity | NA       |
| unknown      | NA | NA       | NA       | SJC_S004092 | NA  | NA     | NA | Sjp_0103080.1 | NA                        | NA       |
| unknown      | NA | NA       | NA       | SJC_S004092 | NA  | NA     | NA | Sjp_0103100.1 | NA                        | NA       |
| unknown      | NA | NA       | NA       | SJC_S004092 | NA  | NA     | NA | Sjp_0103110.1 | NA                        | NA       |
| unknown      | NA | NA       | NA       | SJC_S004092 | NA  | NA     | NA | Sjp_0103120.1 | NA                        | NA       |
| unknown      | NA | NA       | NA       | SJC_S004093 | NA  | NA     | NA | Sjp_0103130.1 | NA                        | NA       |
| unknown      | NA | NA       | NA       | SJC_S004093 | NA  | NA     | NA | Sjp_0103140.1 | NA                        | NA       |

|              |    |          |          |             |       |       |    |               |                       |          |
|--------------|----|----------|----------|-------------|-------|-------|----|---------------|-----------------------|----------|
| unknown      | NA | NA       | NA       | SJC_S004094 | NA    | NA    | NA | Sjp_0103150.1 | catalytic activity    | 0.035844 |
| unknown      | NA | NA       | NA       | SJC_S004094 | NA    | NA    | NA | Sjp_0103160.1 | catalytic activity    | 0.035844 |
| unknown      | NA | NA       | NA       | SJC_S004094 | NA    | NA    | NA | Sjp_0103170.1 | NA                    | NA       |
| unknown      | NA | NA       | NA       | SJC_S004094 | NA    | NA    | NA | Sjp_0103180.1 | catalytic activity    | 0.035844 |
| unknown      | NA | NA       | NA       | SJC_S004094 | NA    | NA    | NA | Sjp_0103190.1 | NA                    | NA       |
| HSB10kb_1363 | 2  | 25333774 | 25374446 | SJC_S004096 | 5493  | 46536 | +  | Sjp_0103200.1 | NA                    | NA       |
| HSB10kb_1363 | 2  | 25333774 | 25374446 | SJC_S004096 | 5493  | 46536 | +  | Sjp_0103210.1 | NA                    | NA       |
| HSB10kb_1363 | 2  | 25333774 | 25374446 | SJC_S004096 | 5493  | 46536 | +  | Sjp_0103220.1 | NA                    | NA       |
| unknown      | NA | NA       | NA       | SJC_S004096 | NA    | NA    | NA | Sjp_0103230.1 | NA                    | NA       |
| unknown      | NA | NA       | NA       | SJC_S004097 | NA    | NA    | NA | Sjp_0103240.1 | NA                    | NA       |
| unknown      | NA | NA       | NA       | SJC_S004097 | NA    | NA    | NA | Sjp_0103250.1 | catalytic activity    | 0.035844 |
| unknown      | NA | NA       | NA       | SJC_S004099 | NA    | NA    | NA | Sjp_0103260.1 | cell part             | 0.009037 |
| unknown      | NA | NA       | NA       | SJC_S004099 | NA    | NA    | NA | Sjp_0103270.1 | biological regulation | 0.76396  |
| HSB10kb_1364 | 4  | 11098701 | 11136410 | SJC_S004101 | 4072  | 40813 | +  | Sjp_0103280.1 | NA                    | NA       |
| HSB10kb_1364 | 4  | 11098701 | 11136410 | SJC_S004101 | 4072  | 40813 | +  | Sjp_0103290.1 | catalytic activity    | 0.035844 |
| unknown      | NA | NA       | NA       | SJC_S004101 | NA    | NA    | NA | Sjp_0103300.1 | NA                    | NA       |
| HSB10kb_1365 | 1  | 48374215 | 48409395 | SJC_S004102 | 11678 | 52857 | -  | Sjp_0103310.1 | cell part             | 0.009037 |
| HSB10kb_1365 | 1  | 48374215 | 48409395 | SJC_S004102 | 11678 | 52857 | -  | Sjp_0103320.1 | NA                    | NA       |
| HSB10kb_1365 | 1  | 48374215 | 48409395 | SJC_S004102 | 11678 | 52857 | -  | Sjp_0103330.1 | transporter activity  | 0.782    |
| unknown      | NA | NA       | NA       | SJC_S004102 | NA    | NA    | NA | Sjp_0103340.1 | transporter activity  | 0.782    |
| unknown      | NA | NA       | NA       | SJC_S004103 | NA    | NA    | NA | Sjp_0103350.1 | NA                    | NA       |
| unknown      | NA | NA       | NA       | SJC_S004103 | NA    | NA    | NA | Sjp_0103360.1 | NA                    | NA       |
| unknown      | NA | NA       | NA       | SJC_S004103 | NA    | NA    | NA | Sjp_0103370.1 | NA                    | NA       |
| unknown      | NA | NA       | NA       | SJC_S004106 | NA    | NA    | NA | Sjp_0103390.1 | NA                    | NA       |
| HSB10kb_1366 | WZ | 44978262 | 44993785 | SJC_S004110 | 19704 | 34099 | +  | Sjp_0103400.1 | NA                    | NA       |
| unknown      | NA | NA       | NA       | SJC_S004111 | NA    | NA    | NA | Sjp_0103410.1 | binding               | 0.052762 |
| unknown      | NA | NA       | NA       | SJC_S004112 | NA    | NA    | NA | Sjp_0103420.1 | transporter activity  | 0.782    |
| unknown      | NA | NA       | NA       | SJC_S004114 | NA    | NA    | NA | Sjp_0103430.1 | catalytic activity    | 0.035844 |
| unknown      | NA | NA       | NA       | SJC_S004114 | NA    | NA    | NA | Sjp_0103440.1 | NA                    | NA       |
| unknown      | NA | NA       | NA       | SJC_S004115 | NA    | NA    | NA | Sjp_0103450.1 | NA                    | NA       |



|              |    |          |          |             |       |       |    |               |                       |          |
|--------------|----|----------|----------|-------------|-------|-------|----|---------------|-----------------------|----------|
| unknown      | NA | NA       | NA       | SJC_S004115 | NA    | NA    | NA | Sjp_0103460.1 | NA                    | NA       |
| unknown      | NA | NA       | NA       | SJC_S004116 | NA    | NA    | NA | Sjp_0103470.1 | NA                    | NA       |
| unknown      | NA | NA       | NA       | SJC_S004116 | NA    | NA    | NA | Sjp_0103480.1 | NA                    | NA       |
| unknown      | NA | NA       | NA       | SJC_S004121 | NA    | NA    | NA | Sjp_0103490.1 | NA                    | NA       |
| unknown      | NA | NA       | NA       | SJC_S004122 | NA    | NA    | NA | Sjp_0103500.1 | catalytic activity    | 0.035844 |
| unknown      | NA | NA       | NA       | SJC_S004122 | NA    | NA    | NA | Sjp_0103510.1 | NA                    | NA       |
| unknown      | NA | NA       | NA       | SJC_S004123 | NA    | NA    | NA | Sjp_0103520.1 | NA                    | NA       |
| unknown      | NA | NA       | NA       | SJC_S004127 | NA    | NA    | NA | Sjp_0103530.1 | catalytic activity    | 0.035844 |
| unknown      | NA | NA       | NA       | SJC_S004128 | NA    | NA    | NA | Sjp_0103540.1 | NA                    | NA       |
| unknown      | NA | NA       | NA       | SJC_S004128 | NA    | NA    | NA | Sjp_0103550.1 | NA                    | NA       |
| unknown      | NA | NA       | NA       | SJC_S004129 | NA    | NA    | NA | Sjp_0103560.1 | NA                    | NA       |
| unknown      | NA | NA       | NA       | SJC_S004130 | NA    | NA    | NA | Sjp_0103570.1 | NA                    | NA       |
| unknown      | NA | NA       | NA       | SJC_S004131 | NA    | NA    | NA | Sjp_0103580.1 | NA                    | NA       |
| unknown      | NA | NA       | NA       | SJC_S004133 | NA    | NA    | NA | Sjp_0103590.1 | NA                    | NA       |
| unknown      | NA | NA       | NA       | SJC_S004133 | NA    | NA    | NA | Sjp_0103600.1 | NA                    | NA       |
| unknown      | NA | NA       | NA       | SJC_S004133 | NA    | NA    | NA | Sjp_0103610.1 | NA                    | NA       |
| unknown      | NA | NA       | NA       | SJC_S004133 | NA    | NA    | NA | Sjp_0103620.1 | NA                    | NA       |
| HSB10kb_1367 | 2  | 33170472 | 33182762 | SJC_S004135 | 3130  | 19547 | +  | Sjp_0103630.1 | cellular process      | 0.63852  |
| unknown      | NA | NA       | NA       | SJC_S004135 | NA    | NA    | NA | Sjp_0103640.1 | response to stimulus  | NA       |
| unknown      | NA | NA       | NA       | SJC_S004136 | NA    | NA    | NA | Sjp_0103650.1 | catalytic activity    | 0.035844 |
| HSB10kb_1368 | 6  | 12205752 | 12219066 | SJC_S004137 | 12167 | 22344 | -  | Sjp_0103660.1 | metabolic process     | 0.41934  |
| unknown      | NA | NA       | NA       | SJC_S004138 | NA    | NA    | NA | Sjp_0103670.1 | binding               | 0.052762 |
| unknown      | NA | NA       | NA       | SJC_S004140 | NA    | NA    | NA | Sjp_0103680.1 | NA                    | NA       |
| unknown      | NA | NA       | NA       | SJC_S004141 | NA    | NA    | NA | Sjp_0103690.1 | binding               | 0.052762 |
| unknown      | NA | NA       | NA       | SJC_S004141 | NA    | NA    | NA | Sjp_0103700.1 | biological regulation | 0.76396  |
| unknown      | NA | NA       | NA       | SJC_S004147 | NA    | NA    | NA | Sjp_0103710.1 | NA                    | NA       |
| unknown      | NA | NA       | NA       | SJC_S004150 | NA    | NA    | NA | Sjp_0103720.1 | binding               | 0.052762 |
| unknown      | NA | NA       | NA       | SJC_S004152 | NA    | NA    | NA | Sjp_0103730.1 | cell part             | 0.009037 |
| unknown      | NA | NA       | NA       | SJC_S004153 | NA    | NA    | NA | Sjp_0103740.1 | NA                    | NA       |
| unknown      | NA | NA       | NA       | SJC_S004154 | NA    | NA    | NA | Sjp_0103750.1 | binding               | 0.052762 |
| unknown      | NA | NA       | NA       | SJC_S004154 | NA    | NA    | NA | Sjp_0103760.1 | NA                    | NA       |

|              |    |          |          |             |       |       |    |               |                                               |          |
|--------------|----|----------|----------|-------------|-------|-------|----|---------------|-----------------------------------------------|----------|
| unknown      | NA | NA       | NA       | SJC_S004156 | NA    | NA    | NA | Sjp_0103770.1 | cell part                                     | 0.009037 |
| unknown      | NA | NA       | NA       | SJC_S004157 | NA    | NA    | NA | Sjp_0103780.1 | NA                                            | NA       |
| unknown      | NA | NA       | NA       | SJC_S004158 | NA    | NA    | NA | Sjp_0103790.1 | NA                                            | NA       |
| unknown      | NA | NA       | NA       | SJC_S004159 | NA    | NA    | NA | Sjp_0103800.1 | NA                                            | NA       |
| unknown      | NA | NA       | NA       | SJC_S004160 | NA    | NA    | NA | Sjp_0103810.1 | NA                                            | NA       |
| unknown      | NA | NA       | NA       | SJC_S004163 | NA    | NA    | NA | Sjp_0103820.1 | catalytic activity                            | 0.035844 |
| unknown      | NA | NA       | NA       | SJC_S004164 | NA    | NA    | NA | Sjp_0103830.1 | NA                                            | NA       |
| unknown      | NA | NA       | NA       | SJC_S004165 | NA    | NA    | NA | Sjp_0103840.1 | cell part                                     | 0.009037 |
| unknown      | NA | NA       | NA       | SJC_S004166 | NA    | NA    | NA | Sjp_0103850.1 | NA                                            | NA       |
| unknown      | NA | NA       | NA       | SJC_S004166 | NA    | NA    | NA | Sjp_0103860.1 | NA                                            | NA       |
| unknown      | NA | NA       | NA       | SJC_S004168 | NA    | NA    | NA | Sjp_0103870.1 | NA                                            | NA       |
| unknown      | NA | NA       | NA       | SJC_S004169 | NA    | NA    | NA | Sjp_0103880.1 | NA                                            | NA       |
| unknown      | NA | NA       | NA       | SJC_S004171 | NA    | NA    | NA | Sjp_0103890.1 | NA                                            | NA       |
| unknown      | NA | NA       | NA       | SJC_S004173 | NA    | NA    | NA | Sjp_0103900.1 | catalytic activity                            | 0.035844 |
| unknown      | NA | NA       | NA       | SJC_S004176 | NA    | NA    | NA | Sjp_0103910.1 | binding                                       | 0.052762 |
| unknown      | NA | NA       | NA       | SJC_S004177 | NA    | NA    | NA | Sjp_0103920.1 | response to stimulus                          | NA       |
| unknown      | NA | NA       | NA       | SJC_S004178 | NA    | NA    | NA | Sjp_0103930.1 | NA                                            | NA       |
| HSB10kb_1369 | 2  | 28877441 | 28888374 | SJC_S004179 | 12720 | 26532 |    | Sjp_0103940.1 | NA                                            | NA       |
| unknown      | NA | NA       | NA       | SJC_S004180 | NA    | NA    | NA | Sjp_0103950.1 | NA                                            | NA       |
| unknown      | NA | NA       | NA       | SJC_S004182 | NA    | NA    | NA | Sjp_0103960.1 | cellular component organization or biogenesis | NA       |
| unknown      | NA | NA       | NA       | SJC_S004184 | NA    | NA    | NA | Sjp_0103970.1 | NA                                            | NA       |
| unknown      | NA | NA       | NA       | SJC_S004190 | NA    | NA    | NA | Sjp_0103980.1 | cell part                                     | 0.009037 |
| unknown      | NA | NA       | NA       | SJC_S004191 | NA    | NA    | NA | Sjp_0103990.1 | cell part                                     | 0.009037 |
| unknown      | NA | NA       | NA       | SJC_S004193 | NA    | NA    | NA | Sjp_0104000.1 | binding                                       | 0.052762 |
| unknown      | NA | NA       | NA       | SJC_S004194 | NA    | NA    | NA | Sjp_0104010.1 | NA                                            | NA       |
| unknown      | NA | NA       | NA       | SJC_S004195 | NA    | NA    | NA | Sjp_0104020.1 | NA                                            | NA       |
| unknown      | NA | NA       | NA       | SJC_S004195 | NA    | NA    | NA | Sjp_0104030.1 | NA                                            | NA       |
| unknown      | NA | NA       | NA       | SJC_S004196 | NA    | NA    | NA | Sjp_0104040.1 | NA                                            | NA       |
| unknown      | NA | NA       | NA       | SJC_S004196 | NA    | NA    | NA | Sjp_0104050.1 | NA                                            | NA       |
| unknown      | NA | NA       | NA       | SJC_S004197 | NA    | NA    | NA | Sjp_0104060.1 | catalytic activity                            | 0.035844 |

|              |    |          |          |             |    |       |    |               |                       |          |
|--------------|----|----------|----------|-------------|----|-------|----|---------------|-----------------------|----------|
| unknown      | NA | NA       | NA       | SJC_S004199 | NA | NA    | NA | Sjp_0104070.1 | NA                    | NA       |
| unknown      | NA | NA       | NA       | SJC_S004200 | NA | NA    | NA | Sjp_0104080.1 | binding               | 0.052762 |
| unknown      | NA | NA       | NA       | SJC_S004201 | NA | NA    | NA | Sjp_0104090.1 | NA                    | NA       |
| unknown      | NA | NA       | NA       | SJC_S004203 | NA | NA    | NA | Sjp_0104100.1 | NA                    | NA       |
| unknown      | NA | NA       | NA       | SJC_S004204 | NA | NA    | NA | Sjp_0104110.1 | NA                    | NA       |
| unknown      | NA | NA       | NA       | SJC_S004206 | NA | NA    | NA | Sjp_0104120.1 | NA                    | NA       |
| unknown      | NA | NA       | NA       | SJC_S004207 | NA | NA    | NA | Sjp_0104130.1 | NA                    | NA       |
| unknown      | NA | NA       | NA       | SJC_S004208 | NA | NA    | NA | Sjp_0104140.1 | NA                    | NA       |
| unknown      | NA | NA       | NA       | SJC_S004209 | NA | NA    | NA | Sjp_0104150.1 | biological regulation | 0.76396  |
| HSB10kb_1370 | 1  | 18247292 | 18272603 | SJC_S004210 | 1  | 25565 | +  | Sjp_0104160.1 | NA                    | NA       |
| HSB10kb_1370 | 1  | 18247292 | 18272603 | SJC_S004210 | 1  | 25565 | +  | Sjp_0104170.1 | NA                    | NA       |
| HSB10kb_1370 | 1  | 18247292 | 18272603 | SJC_S004210 | 1  | 25565 | +  | Sjp_0104180.1 | NA                    | NA       |
| unknown      | NA | NA       | NA       | SJC_S004211 | NA | NA    | NA | Sjp_0104190.1 | NA                    | NA       |
| unknown      | NA | NA       | NA       | SJC_S004212 | NA | NA    | NA | Sjp_0104200.1 | NA                    | NA       |
| unknown      | NA | NA       | NA       | SJC_S004214 | NA | NA    | NA | Sjp_0104210.1 | NA                    | NA       |
| unknown      | NA | NA       | NA       | SJC_S004214 | NA | NA    | NA | Sjp_0104220.1 | NA                    | NA       |
| unknown      | NA | NA       | NA       | SJC_S004216 | NA | NA    | NA | Sjp_0104230.1 | immune system process | NA       |
| unknown      | NA | NA       | NA       | SJC_S004217 | NA | NA    | NA | Sjp_0104240.1 | NA                    | NA       |
| unknown      | NA | NA       | NA       | SJC_S004218 | NA | NA    | NA | Sjp_0104250.1 | NA                    | NA       |
| unknown      | NA | NA       | NA       | SJC_S004219 | NA | NA    | NA | Sjp_0104260.1 | NA                    | NA       |
| unknown      | NA | NA       | NA       | SJC_S004221 | NA | NA    | NA | Sjp_0104270.1 | NA                    | NA       |
| unknown      | NA | NA       | NA       | SJC_S004222 | NA | NA    | NA | Sjp_0104280.1 | biological regulation | 0.76396  |
| unknown      | NA | NA       | NA       | SJC_S004224 | NA | NA    | NA | Sjp_0104290.1 | NA                    | NA       |
| unknown      | NA | NA       | NA       | SJC_S004225 | NA | NA    | NA | Sjp_0104300.1 | cell part             | 0.009037 |
| unknown      | NA | NA       | NA       | SJC_S004230 | NA | NA    | NA | Sjp_0104310.1 | NA                    | NA       |
| unknown      | NA | NA       | NA       | SJC_S004236 | NA | NA    | NA | Sjp_0104330.1 | NA                    | NA       |
| unknown      | NA | NA       | NA       | SJC_S004240 | NA | NA    | NA | Sjp_0104340.1 | NA                    | NA       |
| unknown      | NA | NA       | NA       | SJC_S004244 | NA | NA    | NA | Sjp_0104350.1 | catalytic activity    | 0.035844 |
| unknown      | NA | NA       | NA       | SJC_S004247 | NA | NA    | NA | Sjp_0104360.1 | NA                    | NA       |
| unknown      | NA | NA       | NA       | SJC_S004250 | NA | NA    | NA | Sjp_0104370.1 | cell part             | 0.009037 |
| unknown      | NA | NA       | NA       | SJC_S004252 | NA | NA    | NA | Sjp_0104390.1 | NA                    | NA       |

|         |    |    |    |             |    |    |    |               |                       |          |
|---------|----|----|----|-------------|----|----|----|---------------|-----------------------|----------|
| unknown | NA | NA | NA | SJC_S004255 | NA | NA | NA | Sjp_0104400.1 | NA                    | NA       |
| unknown | NA | NA | NA | SJC_S004259 | NA | NA | NA | Sjp_0104410.1 | cell part             | 0.009037 |
| unknown | NA | NA | NA | SJC_S004259 | NA | NA | NA | Sjp_0104420.1 | NA                    | NA       |
| unknown | NA | NA | NA | SJC_S004260 | NA | NA | NA | Sjp_0104430.1 | NA                    | NA       |
| unknown | NA | NA | NA | SJC_S004261 | NA | NA | NA | Sjp_0104440.1 | NA                    | NA       |
| unknown | NA | NA | NA | SJC_S004261 | NA | NA | NA | Sjp_0104450.1 | NA                    | NA       |
| unknown | NA | NA | NA | SJC_S004262 | NA | NA | NA | Sjp_0104460.1 | NA                    | NA       |
| unknown | NA | NA | NA | SJC_S004264 | NA | NA | NA | Sjp_0104470.1 | NA                    | NA       |
| unknown | NA | NA | NA | SJC_S004266 | NA | NA | NA | Sjp_0104480.1 | catalytic activity    | 0.035844 |
| unknown | NA | NA | NA | SJC_S004266 | NA | NA | NA | Sjp_0104490.1 | NA                    | NA       |
| unknown | NA | NA | NA | SJC_S004269 | NA | NA | NA | Sjp_0104500.1 | NA                    | NA       |
| unknown | NA | NA | NA | SJC_S004273 | NA | NA | NA | Sjp_0104510.1 | binding               | 0.052762 |
| unknown | NA | NA | NA | SJC_S004275 | NA | NA | NA | Sjp_0104520.1 | response to stimulus  | NA       |
| unknown | NA | NA | NA | SJC_S004277 | NA | NA | NA | Sjp_0104530.1 | NA                    | NA       |
| unknown | NA | NA | NA | SJC_S004278 | NA | NA | NA | Sjp_0104540.1 | NA                    | NA       |
| unknown | NA | NA | NA | SJC_S004279 | NA | NA | NA | Sjp_0104550.1 | NA                    | NA       |
| unknown | NA | NA | NA | SJC_S004280 | NA | NA | NA | Sjp_0104560.1 | NA                    | NA       |
| unknown | NA | NA | NA | SJC_S004282 | NA | NA | NA | Sjp_0104570.1 | NA                    | NA       |
| unknown | NA | NA | NA | SJC_S004282 | NA | NA | NA | Sjp_0104580.1 | cell part             | 0.009037 |
| unknown | NA | NA | NA | SJC_S004283 | NA | NA | NA | Sjp_0104590.1 | NA                    | NA       |
| unknown | NA | NA | NA | SJC_S004286 | NA | NA | NA | Sjp_0104600.1 | catalytic activity    | 0.035844 |
| unknown | NA | NA | NA | SJC_S004286 | NA | NA | NA | Sjp_0104610.1 | cell part             | 0.009037 |
| unknown | NA | NA | NA | SJC_S004289 | NA | NA | NA | Sjp_0104630.1 | NA                    | NA       |
| unknown | NA | NA | NA | SJC_S004291 | NA | NA | NA | Sjp_0104640.1 | NA                    | NA       |
| unknown | NA | NA | NA | SJC_S004292 | NA | NA | NA | Sjp_0104650.1 | catalytic activity    | 0.035844 |
| unknown | NA | NA | NA | SJC_S004293 | NA | NA | NA | Sjp_0104660.1 | biological regulation | 0.76396  |
| unknown | NA | NA | NA | SJC_S004294 | NA | NA | NA | Sjp_0104670.1 | cellular process      | 0.63852  |
| unknown | NA | NA | NA | SJC_S004296 | NA | NA | NA | Sjp_0104680.1 | NA                    | NA       |
| unknown | NA | NA | NA | SJC_S004299 | NA | NA | NA | Sjp_0104690.1 | NA                    | NA       |
| unknown | NA | NA | NA | SJC_S004300 | NA | NA | NA | Sjp_0104700.1 | NA                    | NA       |
| unknown | NA | NA | NA | SJC_S004301 | NA | NA | NA | Sjp_0104710.1 | binding               | 0.052762 |
| unknown | NA | NA | NA | SJC_S004301 | NA | NA | NA | Sjp_0104720.1 | NA                    | NA       |

|              |    |          |          |             |      |       |    |               |                           |          |
|--------------|----|----------|----------|-------------|------|-------|----|---------------|---------------------------|----------|
| HSB10kb_1371 | WZ | 24908200 | 24927682 | SJC_S004302 | 4401 | 18523 | -  | Sjp_0104730.1 | enzyme regulator activity | 0.1755   |
| unknown      | NA | NA       | NA       | SJC_S004303 | NA   | NA    | NA | Sjp_0104740.1 | catalytic activity        | 0.035844 |
| unknown      | NA | NA       | NA       | SJC_S004305 | NA   | NA    | NA | Sjp_0104750.1 | NA                        | NA       |
| HSB10kb_1372 | 4  | 23132341 | 23181949 | SJC_S004306 | 149  | 39854 | +  | Sjp_0104760.1 | NA                        | NA       |
| unknown      | NA | NA       | NA       | SJC_S004307 | NA   | NA    | NA | Sjp_0104770.1 | NA                        | NA       |
| unknown      | NA | NA       | NA       | SJC_S004308 | NA   | NA    | NA | Sjp_0104780.1 | NA                        | NA       |
| unknown      | NA | NA       | NA       | SJC_S004308 | NA   | NA    | NA | Sjp_0104790.1 | NA                        | NA       |
| unknown      | NA | NA       | NA       | SJC_S004309 | NA   | NA    | NA | Sjp_0104800.1 | NA                        | NA       |
| unknown      | NA | NA       | NA       | SJC_S004309 | NA   | NA    | NA | Sjp_0104810.1 | catalytic activity        | 0.035844 |
| unknown      | NA | NA       | NA       | SJC_S004313 | NA   | NA    | NA | Sjp_0104820.1 | NA                        | NA       |
| unknown      | NA | NA       | NA       | SJC_S004315 | NA   | NA    | NA | Sjp_0104830.1 | catalytic activity        | 0.035844 |
| unknown      | NA | NA       | NA       | SJC_S004317 | NA   | NA    | NA | Sjp_0104840.1 | NA                        | NA       |
| unknown      | NA | NA       | NA       | SJC_S004323 | NA   | NA    | NA | Sjp_0104850.1 | NA                        | NA       |
| unknown      | NA | NA       | NA       | SJC_S004325 | NA   | NA    | NA | Sjp_0104860.1 | NA                        | NA       |
| unknown      | NA | NA       | NA       | SJC_S004326 | NA   | NA    | NA | Sjp_0104870.1 | metabolic process         | 0.41934  |
| unknown      | NA | NA       | NA       | SJC_S004328 | NA   | NA    | NA | Sjp_0104880.1 | NA                        | NA       |
| unknown      | NA | NA       | NA       | SJC_S004332 | NA   | NA    | NA | Sjp_0104890.1 | NA                        | NA       |
| unknown      | NA | NA       | NA       | SJC_S004334 | NA   | NA    | NA | Sjp_0104900.1 | NA                        | NA       |
| unknown      | NA | NA       | NA       | SJC_S004335 | NA   | NA    | NA | Sjp_0104910.1 | NA                        | NA       |
| unknown      | NA | NA       | NA       | SJC_S004336 | NA   | NA    | NA | Sjp_0104920.1 | catalytic activity        | 0.035844 |
| unknown      | NA | NA       | NA       | SJC_S004340 | NA   | NA    | NA | Sjp_0104930.1 | NA                        | NA       |
| unknown      | NA | NA       | NA       | SJC_S004341 | NA   | NA    | NA | Sjp_0104940.1 | NA                        | NA       |
| unknown      | NA | NA       | NA       | SJC_S004346 | NA   | NA    | NA | Sjp_0104950.1 | NA                        | NA       |
| unknown      | NA | NA       | NA       | SJC_S004349 | NA   | NA    | NA | Sjp_0104960.1 | NA                        | NA       |
| unknown      | NA | NA       | NA       | SJC_S004351 | NA   | NA    | NA | Sjp_0104970.1 | NA                        | NA       |
| unknown      | NA | NA       | NA       | SJC_S004354 | NA   | NA    | NA | Sjp_0104980.1 | NA                        | NA       |
| unknown      | NA | NA       | NA       | SJC_S004359 | NA   | NA    | NA | Sjp_0104990.1 | catalytic activity        | 0.035844 |
| unknown      | NA | NA       | NA       | SJC_S004369 | NA   | NA    | NA | Sjp_0105000.1 | NA                        | NA       |
| unknown      | NA | NA       | NA       | SJC_S004378 | NA   | NA    | NA | Sjp_0105010.1 | catalytic activity        | 0.035844 |
| unknown      | NA | NA       | NA       | SJC_S004380 | NA   | NA    | NA | Sjp_0105020.1 | NA                        | NA       |
| unknown      | NA | NA       | NA       | SJC_S004381 | NA   | NA    | NA | Sjp_0105030.1 | NA                        | NA       |

|              |    |          |          |             |      |       |    |               |                               |          |
|--------------|----|----------|----------|-------------|------|-------|----|---------------|-------------------------------|----------|
| unknown      | NA | NA       | NA       | SJC_S004381 | NA   | NA    | NA | Sjp_0105040.1 | NA                            | NA       |
| unknown      | NA | NA       | NA       | SJC_S004385 | NA   | NA    | NA | Sjp_0105050.1 | NA                            | NA       |
| unknown      | NA | NA       | NA       | SJC_S004389 | NA   | NA    | NA | Sjp_0105060.1 | NA                            | NA       |
| unknown      | NA | NA       | NA       | SJC_S004394 | NA   | NA    | NA | Sjp_0105070.1 | NA                            | NA       |
| unknown      | NA | NA       | NA       | SJC_S004398 | NA   | NA    | NA | Sjp_0105080.1 | NA                            | NA       |
| unknown      | NA | NA       | NA       | SJC_S004410 | NA   | NA    | NA | Sjp_0105090.1 | NA                            | NA       |
| unknown      | NA | NA       | NA       | SJC_S004413 | NA   | NA    | NA | Sjp_0105100.1 | NA                            | NA       |
| unknown      | NA | NA       | NA       | SJC_S004420 | NA   | NA    | NA | Sjp_0105110.1 | NA                            | NA       |
| unknown      | NA | NA       | NA       | SJC_S004421 | NA   | NA    | NA | Sjp_0105120.1 | catalytic activity            | 0.035844 |
| HSB10kb_1373 | WZ | 49490255 | 49508352 | SJC_S004423 | 4252 | 21876 | +  | Sjp_0105130.1 | cell part                     | 0.009037 |
| unknown      | NA | NA       | NA       | SJC_S004424 | NA   | NA    | NA | Sjp_0105140.1 | NA                            | NA       |
| unknown      | NA | NA       | NA       | SJC_S004427 | NA   | NA    | NA | Sjp_0105150.1 | NA                            | NA       |
| unknown      | NA | NA       | NA       | SJC_S004427 | NA   | NA    | NA | Sjp_0105160.1 | catalytic activity            | 0.035844 |
| unknown      | NA | NA       | NA       | SJC_S004427 | NA   | NA    | NA | Sjp_0105170.1 | NA                            | NA       |
| unknown      | NA | NA       | NA       | SJC_S004429 | NA   | NA    | NA | Sjp_0105180.1 | metabolic process             | 0.41934  |
| unknown      | NA | NA       | NA       | SJC_S004430 | NA   | NA    | NA | Sjp_0105190.1 | NA                            | NA       |
| unknown      | NA | NA       | NA       | SJC_S004432 | NA   | NA    | NA | Sjp_0105200.1 | NA                            | NA       |
| HSB10kb_1374 | WZ | 16671502 | 16683804 | SJC_S004438 | 1946 | 13218 | -  | Sjp_0105210.1 | cellular process              | 0.63852  |
| HSB10kb_1374 | WZ | 16671502 | 16683804 | SJC_S004438 | 1946 | 13218 | -  | Sjp_0105220.1 | NA                            | NA       |
| unknown      | NA | NA       | NA       | SJC_S004440 | NA   | NA    | NA | Sjp_0105230.1 | cell part                     | 0.009037 |
| unknown      | NA | NA       | NA       | SJC_S004442 | NA   | NA    | NA | Sjp_0105240.1 | cellular process              | 0.63852  |
| unknown      | NA | NA       | NA       | SJC_S004443 | NA   | NA    | NA | Sjp_0105250.1 | binding                       | 0.052762 |
| unknown      | NA | NA       | NA       | SJC_S004449 | NA   | NA    | NA | Sjp_0105260.1 | NA                            | NA       |
| unknown      | NA | NA       | NA       | SJC_S004450 | NA   | NA    | NA | Sjp_0105270.1 | NA                            | NA       |
| unknown      | NA | NA       | NA       | SJC_S004452 | NA   | NA    | NA | Sjp_0105280.1 | NA                            | NA       |
| unknown      | NA | NA       | NA       | SJC_S004453 | NA   | NA    | NA | Sjp_0105290.1 | molecular transducer activity | 0.50162  |
| unknown      | NA | NA       | NA       | SJC_S004454 | NA   | NA    | NA | Sjp_0105300.1 | metabolic process             | 0.41934  |
| unknown      | NA | NA       | NA       | SJC_S004455 | NA   | NA    | NA | Sjp_0105310.1 | biological regulation         | 0.76396  |
| unknown      | NA | NA       | NA       | SJC_S004456 | NA   | NA    | NA | Sjp_0105320.1 | NA                            | NA       |

|              |    |          |          |             |       |       |    |               |                               |          |
|--------------|----|----------|----------|-------------|-------|-------|----|---------------|-------------------------------|----------|
| unknown      | NA | NA       | NA       | SJC_S004457 | NA    | NA    | NA | Sjp_0105330.1 | NA                            | NA       |
| unknown      | NA | NA       | NA       | SJC_S004459 | NA    | NA    | NA | Sjp_0105340.1 | NA                            | NA       |
| unknown      | NA | NA       | NA       | SJC_S004461 | NA    | NA    | NA | Sjp_0105360.1 | NA                            | NA       |
| unknown      | NA | NA       | NA       | SJC_S004462 | NA    | NA    | NA | Sjp_0105370.1 | NA                            | NA       |
| unknown      | NA | NA       | NA       | SJC_S004464 | NA    | NA    | NA | Sjp_0105380.1 | biological regulation         | 0.76396  |
| unknown      | NA | NA       | NA       | SJC_S004464 | NA    | NA    | NA | Sjp_0105390.1 | cell part                     | 0.009037 |
| unknown      | NA | NA       | NA       | SJC_S004464 | NA    | NA    | NA | Sjp_0105400.1 | NA                            | NA       |
| unknown      | NA | NA       | NA       | SJC_S004466 | NA    | NA    | NA | Sjp_0105410.1 | NA                            | NA       |
| unknown      | NA | NA       | NA       | SJC_S004469 | NA    | NA    | NA | Sjp_0105420.1 | catalytic activity            | 0.035844 |
| unknown      | NA | NA       | NA       | SJC_S004471 | NA    | NA    | NA | Sjp_0105430.1 | cell part                     | 0.009037 |
| unknown      | NA | NA       | NA       | SJC_S004473 | NA    | NA    | NA | Sjp_0105440.1 | NA                            | NA       |
| unknown      | NA | NA       | NA       | SJC_S004474 | NA    | NA    | NA | Sjp_0105450.1 | establishment of localization | NA       |
| unknown      | NA | NA       | NA       | SJC_S004475 | NA    | NA    | NA | Sjp_0105460.1 | cellular process              | 0.63852  |
| unknown      | NA | NA       | NA       | SJC_S004475 | NA    | NA    | NA | Sjp_0105470.1 | NA                            | NA       |
| unknown      | NA | NA       | NA       | SJC_S004476 | NA    | NA    | NA | Sjp_0105480.1 | metabolic process             | 0.41934  |
| unknown      | NA | NA       | NA       | SJC_S004476 | NA    | NA    | NA | Sjp_0105490.1 | NA                            | NA       |
| unknown      | NA | NA       | NA       | SJC_S004478 | NA    | NA    | NA | Sjp_0105500.1 | NA                            | NA       |
| unknown      | NA | NA       | NA       | SJC_S004480 | NA    | NA    | NA | Sjp_0105510.1 | NA                            | NA       |
| unknown      | NA | NA       | NA       | SJC_S004482 | NA    | NA    | NA | Sjp_0105520.1 | NA                            | NA       |
| unknown      | NA | NA       | NA       | SJC_S004482 | NA    | NA    | NA | Sjp_0105530.1 | NA                            | NA       |
| unknown      | NA | NA       | NA       | SJC_S004485 | NA    | NA    | NA | Sjp_0105540.1 | cellular process              | 0.63852  |
| unknown      | NA | NA       | NA       | SJC_S004488 | NA    | NA    | NA | Sjp_0105550.1 | NA                            | NA       |
| unknown      | NA | NA       | NA       | SJC_S004489 | NA    | NA    | NA | Sjp_0105560.1 | NA                            | NA       |
| unknown      | NA | NA       | NA       | SJC_S004490 | NA    | NA    | NA | Sjp_0105570.1 | NA                            | NA       |
| HSB10kb_1375 | 4  | 24630064 | 24652562 | SJC_S004494 | 29445 | 49705 | -  | Sjp_0105580.1 | NA                            | NA       |
| HSB10kb_1375 | 4  | 24630064 | 24652562 | SJC_S004494 | 29445 | 49705 | -  | Sjp_0105590.1 | NA                            | NA       |
| unknown      | NA | NA       | NA       | SJC_S004498 | NA    | NA    | NA | Sjp_0105600.1 | NA                            | NA       |
| unknown      | NA | NA       | NA       | SJC_S004499 | NA    | NA    | NA | Sjp_0105610.1 | NA                            | NA       |
| unknown      | NA | NA       | NA       | SJC_S004514 | NA    | NA    | NA | Sjp_0105630.1 | NA                            | NA       |
| unknown      | NA | NA       | NA       | SJC_S004529 | NA    | NA    | NA | Sjp_0105640.1 | NA                            | NA       |
| unknown      | NA | NA       | NA       | SJC_S004535 | NA    | NA    | NA | Sjp_0105650.1 | NA                            | NA       |

|         |    |    |    |             |    |    |    |               |                                               |          |
|---------|----|----|----|-------------|----|----|----|---------------|-----------------------------------------------|----------|
| unknown | NA | NA | NA | SJC_S004537 | NA | NA | NA | Sjp_0105660.1 | NA                                            | NA       |
| unknown | NA | NA | NA | SJC_S004539 | NA | NA | NA | Sjp_0105670.1 | NA                                            | NA       |
| unknown | NA | NA | NA | SJC_S004542 | NA | NA | NA | Sjp_0105680.1 | NA                                            | NA       |
| unknown | NA | NA | NA | SJC_S004547 | NA | NA | NA | Sjp_0105690.1 | NA                                            | NA       |
| unknown | NA | NA | NA | SJC_S004551 | NA | NA | NA | Sjp_0105700.1 | NA                                            | NA       |
| unknown | NA | NA | NA | SJC_S004553 | NA | NA | NA | Sjp_0105710.1 | NA                                            | NA       |
| unknown | NA | NA | NA | SJC_S004555 | NA | NA | NA | Sjp_0105720.1 | NA                                            | NA       |
| unknown | NA | NA | NA | SJC_S004556 | NA | NA | NA | Sjp_0105730.1 | cell part                                     | 0.009037 |
| unknown | NA | NA | NA | SJC_S004557 | NA | NA | NA | Sjp_0105740.1 | NA                                            | NA       |
| unknown | NA | NA | NA | SJC_S004559 | NA | NA | NA | Sjp_0105750.1 | catalytic activity                            | 0.035844 |
| unknown | NA | NA | NA | SJC_S004573 | NA | NA | NA | Sjp_0105760.1 | NA                                            | NA       |
| unknown | NA | NA | NA | SJC_S004581 | NA | NA | NA | Sjp_0105770.1 | NA                                            | NA       |
| unknown | NA | NA | NA | SJC_S004584 | NA | NA | NA | Sjp_0105780.1 | NA                                            | NA       |
| unknown | NA | NA | NA | SJC_S004585 | NA | NA | NA | Sjp_0105790.1 | NA                                            | NA       |
| unknown | NA | NA | NA | SJC_S004588 | NA | NA | NA | Sjp_0105800.1 | NA                                            | NA       |
| unknown | NA | NA | NA | SJC_S004592 | NA | NA | NA | Sjp_0105810.1 | NA                                            | NA       |
| unknown | NA | NA | NA | SJC_S004592 | NA | NA | NA | Sjp_0105820.1 | NA                                            | NA       |
| unknown | NA | NA | NA | SJC_S004601 | NA | NA | NA | Sjp_0105830.1 | catalytic activity                            | 0.035844 |
| unknown | NA | NA | NA | SJC_S004613 | NA | NA | NA | Sjp_0105840.1 | NA                                            | NA       |
| unknown | NA | NA | NA | SJC_S004616 | NA | NA | NA | Sjp_0105850.1 | catalytic activity                            | 0.035844 |
| unknown | NA | NA | NA | SJC_S004629 | NA | NA | NA | Sjp_0105860.1 | NA                                            | NA       |
| unknown | NA | NA | NA | SJC_S004634 | NA | NA | NA | Sjp_0105870.1 | NA                                            | NA       |
| unknown | NA | NA | NA | SJC_S004634 | NA | NA | NA | Sjp_0105880.1 | NA                                            | NA       |
| unknown | NA | NA | NA | SJC_S004635 | NA | NA | NA | Sjp_0105890.1 | binding                                       | 0.052762 |
| unknown | NA | NA | NA | SJC_S004640 | NA | NA | NA | Sjp_0105900.1 | cell part                                     | 0.009037 |
| unknown | NA | NA | NA | SJC_S004642 | NA | NA | NA | Sjp_0105910.1 | NA                                            | NA       |
| unknown | NA | NA | NA | SJC_S004644 | NA | NA | NA | Sjp_0105920.1 | cellular component organization or biogenesis | NA       |
| unknown | NA | NA | NA | SJC_S004652 | NA | NA | NA | Sjp_0105930.1 | NA                                            | NA       |
| unknown | NA | NA | NA | SJC_S004653 | NA | NA | NA | Sjp_0105940.1 | NA                                            | NA       |
| unknown | NA | NA | NA | SJC_S004653 | NA | NA | NA | Sjp_0105950.1 | NA                                            | NA       |
| unknown | NA | NA | NA | SJC_S004654 | NA | NA | NA | Sjp_0105960.1 | catalytic activity                            | 0.035844 |



|         |    |    |    |             |    |    |    |               |                       |          |
|---------|----|----|----|-------------|----|----|----|---------------|-----------------------|----------|
| unknown | NA | NA | NA | SJC_S004656 | NA | NA | NA | Sjp_0105970.1 | NA                    | NA       |
| unknown | NA | NA | NA | SJC_S004662 | NA | NA | NA | Sjp_0105980.1 | NA                    | NA       |
| unknown | NA | NA | NA | SJC_S004688 | NA | NA | NA | Sjp_0105990.1 | NA                    | NA       |
| unknown | NA | NA | NA | SJC_S004698 | NA | NA | NA | Sjp_0106000.1 | catalytic activity    | 0.035844 |
| unknown | NA | NA | NA | SJC_S004701 | NA | NA | NA | Sjp_0106010.1 | biological regulation | 0.76396  |
| unknown | NA | NA | NA | SJC_S004705 | NA | NA | NA | Sjp_0106020.1 | catalytic activity    | 0.035844 |
| unknown | NA | NA | NA | SJC_S004712 | NA | NA | NA | Sjp_0106030.1 | NA                    | NA       |
| unknown | NA | NA | NA | SJC_S004713 | NA | NA | NA | Sjp_0106040.1 | NA                    | NA       |
| unknown | NA | NA | NA | SJC_S004714 | NA | NA | NA | Sjp_0106050.1 | NA                    | NA       |
| unknown | NA | NA | NA | SJC_S004717 | NA | NA | NA | Sjp_0106060.1 | NA                    | NA       |
| unknown | NA | NA | NA | SJC_S004718 | NA | NA | NA | Sjp_0106070.1 | NA                    | NA       |
| unknown | NA | NA | NA | SJC_S004719 | NA | NA | NA | Sjp_0106080.1 | NA                    | NA       |
| unknown | NA | NA | NA | SJC_S004720 | NA | NA | NA | Sjp_0106090.1 | catalytic activity    | 0.035844 |
| unknown | NA | NA | NA | SJC_S004721 | NA | NA | NA | Sjp_0106100.1 | binding               | 0.052762 |
| unknown | NA | NA | NA | SJC_S004722 | NA | NA | NA | Sjp_0106110.1 | NA                    | NA       |
| unknown | NA | NA | NA | SJC_S004723 | NA | NA | NA | Sjp_0106120.1 | NA                    | NA       |
| unknown | NA | NA | NA | SJC_S004725 | NA | NA | NA | Sjp_0106130.1 | NA                    | NA       |
| unknown | NA | NA | NA | SJC_S004726 | NA | NA | NA | Sjp_0106140.1 | NA                    | NA       |
| unknown | NA | NA | NA | SJC_S004726 | NA | NA | NA | Sjp_0106150.1 | NA                    | NA       |
| unknown | NA | NA | NA | SJC_S004728 | NA | NA | NA | Sjp_0106160.1 | binding               | 0.052762 |
| unknown | NA | NA | NA | SJC_S004730 | NA | NA | NA | Sjp_0106170.1 | NA                    | NA       |
| unknown | NA | NA | NA | SJC_S004739 | NA | NA | NA | Sjp_0106190.1 | NA                    | NA       |
| unknown | NA | NA | NA | SJC_S004740 | NA | NA | NA | Sjp_0106200.1 | NA                    | NA       |
| unknown | NA | NA | NA | SJC_S004741 | NA | NA | NA | Sjp_0106210.1 | NA                    | NA       |
| unknown | NA | NA | NA | SJC_S004745 | NA | NA | NA | Sjp_0106220.1 | NA                    | NA       |
| unknown | NA | NA | NA | SJC_S004747 | NA | NA | NA | Sjp_0106230.1 | NA                    | NA       |
| unknown | NA | NA | NA | SJC_S004750 | NA | NA | NA | Sjp_0106240.1 | NA                    | NA       |
| unknown | NA | NA | NA | SJC_S004752 | NA | NA | NA | Sjp_0106250.1 | NA                    | NA       |
| unknown | NA | NA | NA | SJC_S004754 | NA | NA | NA | Sjp_0106260.1 | metabolic process     | 0.41934  |
| unknown | NA | NA | NA | SJC_S004756 | NA | NA | NA | Sjp_0106270.1 | NA                    | NA       |
| unknown | NA | NA | NA | SJC_S004757 | NA | NA | NA | Sjp_0106280.1 | NA                    | NA       |
| unknown | NA | NA | NA | SJC_S004765 | NA | NA | NA | Sjp_0106290.1 | cell part             | 0.009037 |

|              |    |          |          |             |    |       |    |               |                                               |          |
|--------------|----|----------|----------|-------------|----|-------|----|---------------|-----------------------------------------------|----------|
| unknown      | NA | NA       | NA       | SJC_S004767 | NA | NA    | NA | Sjp_0106300.1 | NA                                            | NA       |
| unknown      | NA | NA       | NA       | SJC_S004774 | NA | NA    | NA | Sjp_0106310.1 | cellular component organization or biogenesis | NA       |
| unknown      | NA | NA       | NA       | SJC_S004777 | NA | NA    | NA | Sjp_0106320.1 | NA                                            | NA       |
| unknown      | NA | NA       | NA       | SJC_S004778 | NA | NA    | NA | Sjp_0106330.1 | NA                                            | NA       |
| unknown      | NA | NA       | NA       | SJC_S004780 | NA | NA    | NA | Sjp_0106340.1 | NA                                            | NA       |
| unknown      | NA | NA       | NA       | SJC_S004781 | NA | NA    | NA | Sjp_0106350.1 | binding                                       | 0.052762 |
| unknown      | NA | NA       | NA       | SJC_S004781 | NA | NA    | NA | Sjp_0106360.1 | NA                                            | NA       |
| unknown      | NA | NA       | NA       | SJC_S004781 | NA | NA    | NA | Sjp_0106370.1 | NA                                            | NA       |
| unknown      | NA | NA       | NA       | SJC_S004784 | NA | NA    | NA | Sjp_0106380.1 | NA                                            | NA       |
| unknown      | NA | NA       | NA       | SJC_S004785 | NA | NA    | NA | Sjp_0106390.1 | molecular transducer activity                 | 0.50162  |
| unknown      | NA | NA       | NA       | SJC_S004787 | NA | NA    | NA | Sjp_0106400.1 | NA                                            | NA       |
| unknown      | NA | NA       | NA       | SJC_S004787 | NA | NA    | NA | Sjp_0106410.1 | NA                                            | NA       |
| HSB10kb_1376 | WZ | 18344690 | 18357959 | SJC_S004789 | 71 | 15894 | +  | Sjp_0106420.1 | NA                                            | NA       |
| unknown      | NA | NA       | NA       | SJC_S004790 | NA | NA    | NA | Sjp_0106430.1 | cell part                                     | 0.009037 |
| unknown      | NA | NA       | NA       | SJC_S004790 | NA | NA    | NA | Sjp_0106440.1 | NA                                            | NA       |
| unknown      | NA | NA       | NA       | SJC_S004791 | NA | NA    | NA | Sjp_0106450.1 | NA                                            | NA       |
| unknown      | NA | NA       | NA       | SJC_S004792 | NA | NA    | NA | Sjp_0106460.1 | NA                                            | NA       |
| unknown      | NA | NA       | NA       | SJC_S004795 | NA | NA    | NA | Sjp_0106470.1 | NA                                            | NA       |
| unknown      | NA | NA       | NA       | SJC_S004799 | NA | NA    | NA | Sjp_0106480.1 | establishment of localization                 | NA       |
| unknown      | NA | NA       | NA       | SJC_S004800 | NA | NA    | NA | Sjp_0106490.1 | NA                                            | NA       |
| unknown      | NA | NA       | NA       | SJC_S004801 | NA | NA    | NA | Sjp_0106500.1 | NA                                            | NA       |
| unknown      | NA | NA       | NA       | SJC_S004803 | NA | NA    | NA | Sjp_0106510.1 | NA                                            | NA       |
| unknown      | NA | NA       | NA       | SJC_S004804 | NA | NA    | NA | Sjp_0106520.1 | NA                                            | NA       |
| unknown      | NA | NA       | NA       | SJC_S004806 | NA | NA    | NA | Sjp_0106530.1 | NA                                            | NA       |
| unknown      | NA | NA       | NA       | SJC_S004807 | NA | NA    | NA | Sjp_0106540.1 | NA                                            | NA       |
| unknown      | NA | NA       | NA       | SJC_S004811 | NA | NA    | NA | Sjp_0106550.1 | transporter activity                          | 0.782    |
| unknown      | NA | NA       | NA       | SJC_S004813 | NA | NA    | NA | Sjp_0106560.1 | NA                                            | NA       |

|              |    |          |          |             |      |       |    |               |                                    |          |
|--------------|----|----------|----------|-------------|------|-------|----|---------------|------------------------------------|----------|
| unknown      | NA | NA       | NA       | SJC_S004815 | NA   | NA    | NA | Sjp_0106570.1 | NA                                 | NA       |
| unknown      | NA | NA       | NA       | SJC_S004816 | NA   | NA    | NA | Sjp_0106580.1 | catalytic activity                 | 0.035844 |
| unknown      | NA | NA       | NA       | SJC_S004817 | NA   | NA    | NA | Sjp_0106590.1 | NA                                 | NA       |
| HSB10kb_1377 | 1  | 37521389 | 37548191 | SJC_S004818 | 270  | 13333 |    | Sjp_0106600.1 | NA                                 | NA       |
| unknown      | NA | NA       | NA       | SJC_S004821 | NA   | NA    | NA | Sjp_0106610.1 | NA                                 | NA       |
| unknown      | NA | NA       | NA       | SJC_S004822 | NA   | NA    | NA | Sjp_0106620.1 | cellular process                   | 0.63852  |
| unknown      | NA | NA       | NA       | SJC_S004823 | NA   | NA    | NA | Sjp_0106630.1 | biological regulation              | 0.76396  |
| unknown      | NA | NA       | NA       | SJC_S004823 | NA   | NA    | NA | Sjp_0106640.1 | catalytic activity                 | 0.035844 |
| unknown      | NA | NA       | NA       | SJC_S004824 | NA   | NA    | NA | Sjp_0106650.1 | NA                                 | NA       |
| unknown      | NA | NA       | NA       | SJC_S004825 | NA   | NA    | NA | Sjp_0106660.1 | NA                                 | NA       |
| unknown      | NA | NA       | NA       | SJC_S004826 | NA   | NA    | NA | Sjp_0106670.1 | cell part                          | 0.009037 |
| unknown      | NA | NA       | NA       | SJC_S004827 | NA   | NA    | NA | Sjp_0106680.1 | catalytic activity                 | 0.035844 |
| unknown      | NA | NA       | NA       | SJC_S004828 | NA   | NA    | NA | Sjp_0106690.1 | catalytic activity                 | 0.035844 |
| unknown      | NA | NA       | NA       | SJC_S004830 | NA   | NA    | NA | Sjp_0106700.1 | NA                                 | NA       |
| unknown      | NA | NA       | NA       | SJC_S004832 | NA   | NA    | NA | Sjp_0106710.1 | NA                                 | NA       |
| unknown      | NA | NA       | NA       | SJC_S004833 | NA   | NA    | NA | Sjp_0106720.1 | NA                                 | NA       |
| unknown      | NA | NA       | NA       | SJC_S004834 | NA   | NA    | NA | Sjp_0106730.1 | NA                                 | NA       |
| unknown      | NA | NA       | NA       | SJC_S004835 | NA   | NA    | NA | Sjp_0106740.1 | metabolic process                  | 0.41934  |
| unknown      | NA | NA       | NA       | SJC_S004835 | NA   | NA    | NA | Sjp_0106750.1 | biological regulation              | 0.76396  |
| unknown      | NA | NA       | NA       | SJC_S004837 | NA   | NA    | NA | Sjp_0106760.1 | cell part                          | 0.009037 |
| unknown      | NA | NA       | NA       | SJC_S004838 | NA   | NA    | NA | Sjp_0106770.1 | NA                                 | NA       |
| unknown      | NA | NA       | NA       | SJC_S004840 | NA   | NA    | NA | Sjp_0106780.1 | NA                                 | NA       |
| unknown      | NA | NA       | NA       | SJC_S004842 | NA   | NA    | NA | Sjp_0106790.1 | NA                                 | NA       |
| unknown      | NA | NA       | NA       | SJC_S004844 | NA   | NA    | NA | Sjp_0106810.1 | NA                                 | NA       |
| unknown      | NA | NA       | NA       | SJC_S004845 | NA   | NA    | NA | Sjp_0106820.1 | response to stimulus               | NA       |
| unknown      | NA | NA       | NA       | SJC_S004847 | NA   | NA    | NA | Sjp_0106830.1 | NA                                 | NA       |
| HSB10kb_1378 | WZ | 16799849 | 16817201 | SJC_S004847 | 7773 | 24062 | -  | NA            | NA                                 | NA       |
| unknown      | NA | NA       | NA       | SJC_S004848 | NA   | NA    | NA | Sjp_0106840.1 | cellular component organization or | NA       |

|         |    |    |    |             |    |    |    |               |                       |          |
|---------|----|----|----|-------------|----|----|----|---------------|-----------------------|----------|
|         |    |    |    |             |    |    |    |               | biogenesis            |          |
| unknown | NA | NA | NA | SJC_S004851 | NA | NA | NA | Sjp_0106850.1 | NA                    | NA       |
| unknown | NA | NA | NA | SJC_S004852 | NA | NA | NA | Sjp_0106860.1 | NA                    | NA       |
| unknown | NA | NA | NA | SJC_S004855 | NA | NA | NA | Sjp_0106870.1 | NA                    | NA       |
| unknown | NA | NA | NA | SJC_S004857 | NA | NA | NA | Sjp_0106880.1 | NA                    | NA       |
| unknown | NA | NA | NA | SJC_S004860 | NA | NA | NA | Sjp_0106890.1 | NA                    | NA       |
| unknown | NA | NA | NA | SJC_S004861 | NA | NA | NA | Sjp_0106900.1 | NA                    | NA       |
| unknown | NA | NA | NA | SJC_S004862 | NA | NA | NA | Sjp_0106910.1 | NA                    | NA       |
| unknown | NA | NA | NA | SJC_S004865 | NA | NA | NA | Sjp_0106920.1 | NA                    | NA       |
| unknown | NA | NA | NA | SJC_S004866 | NA | NA | NA | Sjp_0106930.1 | cell part             | 0.009037 |
| unknown | NA | NA | NA | SJC_S004870 | NA | NA | NA | Sjp_0106940.1 | biological regulation | 0.76396  |
| unknown | NA | NA | NA | SJC_S004879 | NA | NA | NA | Sjp_0106950.1 | NA                    | NA       |
| unknown | NA | NA | NA | SJC_S004886 | NA | NA | NA | Sjp_0106960.1 | NA                    | NA       |
| unknown | NA | NA | NA | SJC_S004892 | NA | NA | NA | Sjp_0106970.1 | NA                    | NA       |
| unknown | NA | NA | NA | SJC_S004902 | NA | NA | NA | Sjp_0106980.1 | NA                    | NA       |
| unknown | NA | NA | NA | SJC_S004907 | NA | NA | NA | Sjp_0106990.1 | NA                    | NA       |
| unknown | NA | NA | NA | SJC_S004911 | NA | NA | NA | Sjp_0107000.1 | transporter activity  | 0.782    |
| unknown | NA | NA | NA | SJC_S004913 | NA | NA | NA | Sjp_0107010.1 | catalytic activity    | 0.035844 |
| unknown | NA | NA | NA | SJC_S004914 | NA | NA | NA | Sjp_0107020.1 | NA                    | NA       |
| unknown | NA | NA | NA | SJC_S004917 | NA | NA | NA | Sjp_0107030.1 | NA                    | NA       |
| unknown | NA | NA | NA | SJC_S004918 | NA | NA | NA | Sjp_0107040.1 | catalytic activity    | 0.035844 |
| unknown | NA | NA | NA | SJC_S004919 | NA | NA | NA | Sjp_0107050.1 | NA                    | NA       |
| unknown | NA | NA | NA | SJC_S004928 | NA | NA | NA | Sjp_0107060.1 | NA                    | NA       |
| unknown | NA | NA | NA | SJC_S004935 | NA | NA | NA | Sjp_0107070.1 | NA                    | NA       |
| unknown | NA | NA | NA | SJC_S004937 | NA | NA | NA | Sjp_0107080.1 | NA                    | NA       |
| unknown | NA | NA | NA | SJC_S004938 | NA | NA | NA | Sjp_0107090.1 | NA                    | NA       |
| unknown | NA | NA | NA | SJC_S004942 | NA | NA | NA | Sjp_0107100.1 | biological regulation | 0.76396  |
| unknown | NA | NA | NA | SJC_S004945 | NA | NA | NA | Sjp_0107110.1 | NA                    | NA       |
| unknown | NA | NA | NA | SJC_S004951 | NA | NA | NA | Sjp_0107120.1 | NA                    | NA       |
| unknown | NA | NA | NA | SJC_S004954 | NA | NA | NA | Sjp_0107130.1 | NA                    | NA       |
| unknown | NA | NA | NA | SJC_S004961 | NA | NA | NA | Sjp_0107140.1 | NA                    | NA       |

|         |    |    |    |             |    |    |    |               |                               |          |
|---------|----|----|----|-------------|----|----|----|---------------|-------------------------------|----------|
| unknown | NA | NA | NA | SJC_S004964 | NA | NA | NA | Sjp_0107150.1 | NA                            | NA       |
| unknown | NA | NA | NA | SJC_S004966 | NA | NA | NA | Sjp_0107160.1 | NA                            | NA       |
| unknown | NA | NA | NA | SJC_S004966 | NA | NA | NA | Sjp_0107170.1 | NA                            | NA       |
| unknown | NA | NA | NA | SJC_S004967 | NA | NA | NA | Sjp_0107180.1 | molecular transducer activity | 0.50162  |
| unknown | NA | NA | NA | SJC_S004969 | NA | NA | NA | Sjp_0107190.1 | establishment of localization | NA       |
| unknown | NA | NA | NA | SJC_S004970 | NA | NA | NA | Sjp_0107200.1 | NA                            | NA       |
| unknown | NA | NA | NA | SJC_S004973 | NA | NA | NA | Sjp_0107210.1 | catalytic activity            | 0.035844 |
| unknown | NA | NA | NA | SJC_S004989 | NA | NA | NA | Sjp_0107220.1 | NA                            | NA       |
| unknown | NA | NA | NA | SJC_S004999 | NA | NA | NA | Sjp_0107240.1 | NA                            | NA       |
| unknown | NA | NA | NA | SJC_S005001 | NA | NA | NA | Sjp_0107250.1 | NA                            | NA       |
| unknown | NA | NA | NA | SJC_S005005 | NA | NA | NA | Sjp_0107260.1 | NA                            | NA       |
| unknown | NA | NA | NA | SJC_S005006 | NA | NA | NA | Sjp_0107270.1 | NA                            | NA       |
| unknown | NA | NA | NA | SJC_S005007 | NA | NA | NA | Sjp_0107280.1 | biological regulation         | 0.76396  |
| unknown | NA | NA | NA | SJC_S005010 | NA | NA | NA | Sjp_0107290.1 | NA                            | NA       |
| unknown | NA | NA | NA | SJC_S005013 | NA | NA | NA | Sjp_0107300.1 | catalytic activity            | 0.035844 |
| unknown | NA | NA | NA | SJC_S005018 | NA | NA | NA | Sjp_0107310.1 | NA                            | NA       |
| unknown | NA | NA | NA | SJC_S005019 | NA | NA | NA | Sjp_0107320.1 | NA                            | NA       |
| unknown | NA | NA | NA | SJC_S005028 | NA | NA | NA | Sjp_0107330.1 | NA                            | NA       |
| unknown | NA | NA | NA | SJC_S005030 | NA | NA | NA | Sjp_0107340.1 | NA                            | NA       |
| unknown | NA | NA | NA | SJC_S005033 | NA | NA | NA | Sjp_0107350.1 | NA                            | NA       |
| unknown | NA | NA | NA | SJC_S005035 | NA | NA | NA | Sjp_0107360.1 | NA                            | NA       |
| unknown | NA | NA | NA | SJC_S005037 | NA | NA | NA | Sjp_0107370.1 | biological regulation         | 0.76396  |
| unknown | NA | NA | NA | SJC_S005044 | NA | NA | NA | Sjp_0107380.1 | NA                            | NA       |
| unknown | NA | NA | NA | SJC_S005045 | NA | NA | NA | Sjp_0107390.1 | NA                            | NA       |
| unknown | NA | NA | NA | SJC_S005049 | NA | NA | NA | Sjp_0107400.1 | NA                            | NA       |
| unknown | NA | NA | NA | SJC_S005050 | NA | NA | NA | Sjp_0107410.1 | cell part                     | 0.009037 |
| unknown | NA | NA | NA | SJC_S005060 | NA | NA | NA | Sjp_0107420.1 | NA                            | NA       |
| unknown | NA | NA | NA | SJC_S005061 | NA | NA | NA | Sjp_0107430.1 | binding                       | 0.052762 |
| unknown | NA | NA | NA | SJC_S005064 | NA | NA | NA | Sjp_0107440.1 | NA                            | NA       |

|         |    |    |    |             |    |    |    |               |                               |          |
|---------|----|----|----|-------------|----|----|----|---------------|-------------------------------|----------|
| unknown | NA | NA | NA | SJC_S005083 | NA | NA | NA | Sjp_0107450.1 | NA                            | NA       |
| unknown | NA | NA | NA | SJC_S005102 | NA | NA | NA | Sjp_0107460.1 | transporter activity          | 0.782    |
| unknown | NA | NA | NA | SJC_S005113 | NA | NA | NA | Sjp_0107470.1 | catalytic activity            | 0.035844 |
| unknown | NA | NA | NA | SJC_S005118 | NA | NA | NA | Sjp_0107480.1 | cellular process              | 0.63852  |
| unknown | NA | NA | NA | SJC_S005131 | NA | NA | NA | Sjp_0107500.1 | NA                            | NA       |
| unknown | NA | NA | NA | SJC_S005153 | NA | NA | NA | Sjp_0107510.1 | NA                            | NA       |
| unknown | NA | NA | NA | SJC_S005164 | NA | NA | NA | Sjp_0107520.1 | biological regulation         | 0.76396  |
| unknown | NA | NA | NA | SJC_S005167 | NA | NA | NA | Sjp_0107530.1 | NA                            | NA       |
| unknown | NA | NA | NA | SJC_S005169 | NA | NA | NA | Sjp_0107540.1 | NA                            | NA       |
| unknown | NA | NA | NA | SJC_S005171 | NA | NA | NA | Sjp_0107550.1 | NA                            | NA       |
| unknown | NA | NA | NA | SJC_S005173 | NA | NA | NA | Sjp_0107560.1 | cell part                     | 0.009037 |
| unknown | NA | NA | NA | SJC_S005183 | NA | NA | NA | Sjp_0107570.1 | NA                            | NA       |
| unknown | NA | NA | NA | SJC_S005192 | NA | NA | NA | Sjp_0107580.1 | NA                            | NA       |
| unknown | NA | NA | NA | SJC_S005202 | NA | NA | NA | Sjp_0107590.1 | cell part                     | 0.009037 |
| unknown | NA | NA | NA | SJC_S005203 | NA | NA | NA | Sjp_0107600.1 | NA                            | NA       |
| unknown | NA | NA | NA | SJC_S005204 | NA | NA | NA | Sjp_0107610.1 | NA                            | NA       |
| unknown | NA | NA | NA | SJC_S005205 | NA | NA | NA | Sjp_0107620.1 | catalytic activity            | 0.035844 |
| unknown | NA | NA | NA | SJC_S005208 | NA | NA | NA | Sjp_0107630.1 | NA                            | NA       |
| unknown | NA | NA | NA | SJC_S005216 | NA | NA | NA | Sjp_0107640.1 | NA                            | NA       |
| unknown | NA | NA | NA | SJC_S005221 | NA | NA | NA | Sjp_0107660.1 | NA                            | NA       |
| unknown | NA | NA | NA | SJC_S005222 | NA | NA | NA | Sjp_0107670.1 | NA                            | NA       |
| unknown | NA | NA | NA | SJC_S005246 | NA | NA | NA | Sjp_0107680.1 | NA                            | NA       |
| unknown | NA | NA | NA | SJC_S005258 | NA | NA | NA | Sjp_0107690.1 | NA                            | NA       |
| unknown | NA | NA | NA | SJC_S005259 | NA | NA | NA | Sjp_0107700.1 | NA                            | NA       |
| unknown | NA | NA | NA | SJC_S005292 | NA | NA | NA | Sjp_0107710.1 | NA                            | NA       |
| unknown | NA | NA | NA | SJC_S005311 | NA | NA | NA | Sjp_0107720.1 | molecular transducer activity | 0.50162  |
| unknown | NA | NA | NA | SJC_S005321 | NA | NA | NA | Sjp_0107730.1 | NA                            | NA       |
| unknown | NA | NA | NA | SJC_S005337 | NA | NA | NA | Sjp_0107740.1 | NA                            | NA       |
| unknown | NA | NA | NA | SJC_S005348 | NA | NA | NA | Sjp_0107750.1 | NA                            | NA       |
| unknown | NA | NA | NA | SJC_S005353 | NA | NA | NA | Sjp_0107760.1 | response to                   | NA       |

|              |    |         |         |             |      |       |    |               |                           |          |
|--------------|----|---------|---------|-------------|------|-------|----|---------------|---------------------------|----------|
|              |    |         |         |             |      |       |    |               | stimulus                  |          |
| unknown      | NA | NA      | NA      | SJC_S005368 | NA   | NA    | NA | Sjp_0107770.1 | NA                        | NA       |
| unknown      | NA | NA      | NA      | SJC_S005377 | NA   | NA    | NA | Sjp_0107780.1 | NA                        | NA       |
| unknown      | NA | NA      | NA      | SJC_S005404 | NA   | NA    | NA | Sjp_0107790.1 | NA                        | NA       |
| unknown      | NA | NA      | NA      | SJC_S005409 | NA   | NA    | NA | Sjp_0107800.1 | binding                   | 0.052762 |
| unknown      | NA | NA      | NA      | SJC_S005412 | NA   | NA    | NA | Sjp_0107810.1 | biological regulation     | 0.76396  |
| unknown      | NA | NA      | NA      | SJC_S005431 | NA   | NA    | NA | Sjp_0107820.1 | NA                        | NA       |
| unknown      | NA | NA      | NA      | SJC_S005447 | NA   | NA    | NA | Sjp_0107830.1 | biological regulation     | 0.76396  |
| unknown      | NA | NA      | NA      | SJC_S005456 | NA   | NA    | NA | Sjp_0107840.1 | NA                        | NA       |
| unknown      | NA | NA      | NA      | SJC_S005460 | NA   | NA    | NA | Sjp_0107850.1 | NA                        | NA       |
| unknown      | NA | NA      | NA      | SJC_S005464 | NA   | NA    | NA | Sjp_0107860.1 | biological regulation     | 0.76396  |
| unknown      | NA | NA      | NA      | SJC_S005467 | NA   | NA    | NA | Sjp_0107870.1 | NA                        | NA       |
| unknown      | NA | NA      | NA      | SJC_S005473 | NA   | NA    | NA | Sjp_0107880.1 | enzyme regulator activity | 0.1755   |
| unknown      | NA | NA      | NA      | SJC_S005476 | NA   | NA    | NA | Sjp_0107890.1 | NA                        | NA       |
| unknown      | NA | NA      | NA      | SJC_S005484 | NA   | NA    | NA | Sjp_0107900.1 | catalytic activity        | 0.035844 |
| unknown      | NA | NA      | NA      | SJC_S005496 | NA   | NA    | NA | Sjp_0107910.1 | NA                        | NA       |
| unknown      | NA | NA      | NA      | SJC_S005499 | NA   | NA    | NA | Sjp_0107920.1 | NA                        | NA       |
| unknown      | NA | NA      | NA      | SJC_S005501 | NA   | NA    | NA | Sjp_0107930.1 | cell part                 | 0.009037 |
| unknown      | NA | NA      | NA      | SJC_S005502 | NA   | NA    | NA | Sjp_0107940.1 | NA                        | NA       |
| unknown      | NA | NA      | NA      | SJC_S005503 | NA   | NA    | NA | Sjp_0107950.1 | binding                   | 0.052762 |
| unknown      | NA | NA      | NA      | SJC_S005509 | NA   | NA    | NA | Sjp_0107960.1 | NA                        | NA       |
| unknown      | NA | NA      | NA      | SJC_S005510 | NA   | NA    | NA | Sjp_0107970.1 | NA                        | NA       |
| unknown      | NA | NA      | NA      | SJC_S005513 | NA   | NA    | NA | Sjp_0107980.1 | NA                        | NA       |
| unknown      | NA | NA      | NA      | SJC_S005515 | NA   | NA    | NA | Sjp_0107990.1 | NA                        | NA       |
| HSB10kb_1379 | 4  | 8395171 | 8409279 | SJC_S005517 | 3571 | 18168 | -  | Sjp_0108000.1 | catalytic activity        | 0.035844 |
| unknown      | NA | NA      | NA      | SJC_S005518 | NA   | NA    | NA | Sjp_0108010.1 | cell part                 | 0.009037 |
| unknown      | NA | NA      | NA      | SJC_S005518 | NA   | NA    | NA | Sjp_0108020.1 | NA                        | NA       |
| unknown      | NA | NA      | NA      | SJC_S005519 | NA   | NA    | NA | Sjp_0108030.1 | NA                        | NA       |
| unknown      | NA | NA      | NA      | SJC_S005520 | NA   | NA    | NA | Sjp_0108040.1 | NA                        | NA       |

|         |    |    |    |             |    |    |    |               |                       |          |
|---------|----|----|----|-------------|----|----|----|---------------|-----------------------|----------|
| unknown | NA | NA | NA | SJC_S005521 | NA | NA | NA | Sjp_0108050.1 | NA                    | NA       |
| unknown | NA | NA | NA | SJC_S005522 | NA | NA | NA | Sjp_0108060.1 | NA                    | NA       |
| unknown | NA | NA | NA | SJC_S005524 | NA | NA | NA | Sjp_0108070.1 | NA                    | NA       |
| unknown | NA | NA | NA | SJC_S005529 | NA | NA | NA | Sjp_0108080.1 | NA                    | NA       |
| unknown | NA | NA | NA | SJC_S005531 | NA | NA | NA | Sjp_0108090.1 | binding               | 0.052762 |
| unknown | NA | NA | NA | SJC_S005535 | NA | NA | NA | Sjp_0108100.1 | binding               | 0.052762 |
| unknown | NA | NA | NA | SJC_S005541 | NA | NA | NA | Sjp_0108110.1 | NA                    | NA       |
| unknown | NA | NA | NA | SJC_S005542 | NA | NA | NA | Sjp_0108120.1 | NA                    | NA       |
| unknown | NA | NA | NA | SJC_S005544 | NA | NA | NA | Sjp_0108130.1 | NA                    | NA       |
| unknown | NA | NA | NA | SJC_S005547 | NA | NA | NA | Sjp_0108140.1 | biological regulation | 0.76396  |
| unknown | NA | NA | NA | SJC_S005548 | NA | NA | NA | Sjp_0108150.1 | NA                    | NA       |
| unknown | NA | NA | NA | SJC_S005553 | NA | NA | NA | Sjp_0108160.1 | NA                    | NA       |
| unknown | NA | NA | NA | SJC_S005568 | NA | NA | NA | Sjp_0108170.1 | cell part             | 0.009037 |
| unknown | NA | NA | NA | SJC_S005570 | NA | NA | NA | Sjp_0108180.1 | NA                    | NA       |
| unknown | NA | NA | NA | SJC_S005574 | NA | NA | NA | Sjp_0108190.1 | cell part             | 0.009037 |
| unknown | NA | NA | NA | SJC_S005575 | NA | NA | NA | Sjp_0108200.1 | NA                    | NA       |
| unknown | NA | NA | NA | SJC_S005580 | NA | NA | NA | Sjp_0108210.1 | NA                    | NA       |
| unknown | NA | NA | NA | SJC_S005583 | NA | NA | NA | Sjp_0108220.1 | biological regulation | 0.76396  |
| unknown | NA | NA | NA | SJC_S005584 | NA | NA | NA | Sjp_0108230.1 | NA                    | NA       |
| unknown | NA | NA | NA | SJC_S005595 | NA | NA | NA | Sjp_0108240.1 | binding               | 0.052762 |
| unknown | NA | NA | NA | SJC_S005599 | NA | NA | NA | Sjp_0108250.1 | NA                    | NA       |
| unknown | NA | NA | NA | SJC_S005607 | NA | NA | NA | Sjp_0108260.1 | NA                    | NA       |
| unknown | NA | NA | NA | SJC_S005614 | NA | NA | NA | Sjp_0108270.1 | cell part             | 0.009037 |
| unknown | NA | NA | NA | SJC_S005622 | NA | NA | NA | Sjp_0108280.1 | biological regulation | 0.76396  |
| unknown | NA | NA | NA | SJC_S005624 | NA | NA | NA | Sjp_0108290.1 | binding               | 0.052762 |
| unknown | NA | NA | NA | SJC_S005631 | NA | NA | NA | Sjp_0108300.1 | NA                    | NA       |
| unknown | NA | NA | NA | SJC_S005631 | NA | NA | NA | Sjp_0108310.1 | NA                    | NA       |
| unknown | NA | NA | NA | SJC_S005637 | NA | NA | NA | Sjp_0108320.1 | metabolic process     | 0.41934  |
| unknown | NA | NA | NA | SJC_S005641 | NA | NA | NA | Sjp_0108330.1 | NA                    | NA       |
| unknown | NA | NA | NA | SJC_S005644 | NA | NA | NA | Sjp_0108340.1 | catalytic activity    | 0.035844 |



|         |    |    |    |             |    |    |    |               |                                               |          |
|---------|----|----|----|-------------|----|----|----|---------------|-----------------------------------------------|----------|
| unknown | NA | NA | NA | SJC_S005647 | NA | NA | NA | Sjp_0108350.1 | NA                                            | NA       |
| unknown | NA | NA | NA | SJC_S005649 | NA | NA | NA | Sjp_0108360.1 | NA                                            | NA       |
| unknown | NA | NA | NA | SJC_S005649 | NA | NA | NA | Sjp_0108370.1 | catalytic activity                            | 0.035844 |
| unknown | NA | NA | NA | SJC_S005649 | NA | NA | NA | Sjp_0108380.1 | NA                                            | NA       |
| unknown | NA | NA | NA | SJC_S005651 | NA | NA | NA | Sjp_0108390.1 | response to stimulus                          | NA       |
| unknown | NA | NA | NA | SJC_S005654 | NA | NA | NA | Sjp_0108400.1 | NA                                            | NA       |
| unknown | NA | NA | NA | SJC_S005655 | NA | NA | NA | Sjp_0108410.1 | NA                                            | NA       |
| unknown | NA | NA | NA | SJC_S005656 | NA | NA | NA | Sjp_0108420.1 | NA                                            | NA       |
| unknown | NA | NA | NA | SJC_S005660 | NA | NA | NA | Sjp_0108430.1 | NA                                            | NA       |
| unknown | NA | NA | NA | SJC_S005660 | NA | NA | NA | Sjp_0108440.1 | catalytic activity                            | 0.035844 |
| unknown | NA | NA | NA | SJC_S005663 | NA | NA | NA | Sjp_0108450.1 | NA                                            | NA       |
| unknown | NA | NA | NA | SJC_S005667 | NA | NA | NA | Sjp_0108460.1 | NA                                            | NA       |
| unknown | NA | NA | NA | SJC_S005668 | NA | NA | NA | Sjp_0108470.1 | NA                                            | NA       |
| unknown | NA | NA | NA | SJC_S005669 | NA | NA | NA | Sjp_0108480.1 | NA                                            | NA       |
| unknown | NA | NA | NA | SJC_S005670 | NA | NA | NA | Sjp_0108490.1 | NA                                            | NA       |
| unknown | NA | NA | NA | SJC_S005674 | NA | NA | NA | Sjp_0108500.1 | NA                                            | NA       |
| unknown | NA | NA | NA | SJC_S005675 | NA | NA | NA | Sjp_0108510.1 | cellular component organization or biogenesis | NA       |
| unknown | NA | NA | NA | SJC_S005676 | NA | NA | NA | Sjp_0108520.1 | NA                                            | NA       |
| unknown | NA | NA | NA | SJC_S005682 | NA | NA | NA | Sjp_0108530.1 | NA                                            | NA       |
| unknown | NA | NA | NA | SJC_S005683 | NA | NA | NA | Sjp_0108540.1 | NA                                            | NA       |
| unknown | NA | NA | NA | SJC_S005684 | NA | NA | NA | Sjp_0108550.1 | NA                                            | NA       |
| unknown | NA | NA | NA | SJC_S005707 | NA | NA | NA | Sjp_0108560.1 | NA                                            | NA       |
| unknown | NA | NA | NA | SJC_S005708 | NA | NA | NA | Sjp_0108570.1 | catalytic activity                            | 0.035844 |
| unknown | NA | NA | NA | SJC_S005712 | NA | NA | NA | Sjp_0108580.1 | binding                                       | 0.052762 |
| unknown | NA | NA | NA | SJC_S005713 | NA | NA | NA | Sjp_0108590.1 | biological regulation                         | 0.76396  |
| unknown | NA | NA | NA | SJC_S005715 | NA | NA | NA | Sjp_0108600.1 | catalytic activity                            | 0.035844 |
| unknown | NA | NA | NA | SJC_S005718 | NA | NA | NA | Sjp_0108610.1 | transcription regulator activity              | NA       |

|         |    |    |    |             |    |    |    |               |                       |          |
|---------|----|----|----|-------------|----|----|----|---------------|-----------------------|----------|
| unknown | NA | NA | NA | SJC_S005721 | NA | NA | NA | Sjp_0108620.1 | biological regulation | 0.76396  |
| unknown | NA | NA | NA | SJC_S005722 | NA | NA | NA | Sjp_0108630.1 | binding               | 0.052762 |
| unknown | NA | NA | NA | SJC_S005723 | NA | NA | NA | Sjp_0108640.1 | catalytic activity    | 0.035844 |
| unknown | NA | NA | NA | SJC_S005725 | NA | NA | NA | Sjp_0108650.1 | binding               | 0.052762 |
| unknown | NA | NA | NA | SJC_S005729 | NA | NA | NA | Sjp_0108660.1 | NA                    | NA       |
| unknown | NA | NA | NA | SJC_S005730 | NA | NA | NA | Sjp_0108670.1 | cell part             | 0.009037 |
| unknown | NA | NA | NA | SJC_S005731 | NA | NA | NA | Sjp_0108680.1 | NA                    | NA       |
| unknown | NA | NA | NA | SJC_S005736 | NA | NA | NA | Sjp_0108690.1 | NA                    | NA       |
| unknown | NA | NA | NA | SJC_S005737 | NA | NA | NA | Sjp_0108700.1 | NA                    | NA       |
| unknown | NA | NA | NA | SJC_S005738 | NA | NA | NA | Sjp_0108710.1 | NA                    | NA       |
| unknown | NA | NA | NA | SJC_S005739 | NA | NA | NA | Sjp_0108720.1 | NA                    | NA       |
| unknown | NA | NA | NA | SJC_S005740 | NA | NA | NA | Sjp_0108730.1 | NA                    | NA       |
| unknown | NA | NA | NA | SJC_S005741 | NA | NA | NA | Sjp_0108740.1 | NA                    | NA       |
| unknown | NA | NA | NA | SJC_S005745 | NA | NA | NA | Sjp_0108750.1 | catalytic activity    | 0.035844 |
| unknown | NA | NA | NA | SJC_S005746 | NA | NA | NA | Sjp_0108760.1 | binding               | 0.052762 |
| unknown | NA | NA | NA | SJC_S005747 | NA | NA | NA | Sjp_0108770.1 | NA                    | NA       |
| unknown | NA | NA | NA | SJC_S005749 | NA | NA | NA | Sjp_0108780.1 | NA                    | NA       |
| unknown | NA | NA | NA | SJC_S005751 | NA | NA | NA | Sjp_0108790.1 | biological regulation | 0.76396  |
| unknown | NA | NA | NA | SJC_S005753 | NA | NA | NA | Sjp_0108800.1 | NA                    | NA       |
| unknown | NA | NA | NA | SJC_S005758 | NA | NA | NA | Sjp_0108810.1 | NA                    | NA       |
| unknown | NA | NA | NA | SJC_S005763 | NA | NA | NA | Sjp_0108820.1 | transporter activity  | 0.782    |
| unknown | NA | NA | NA | SJC_S005766 | NA | NA | NA | Sjp_0108830.1 | NA                    | NA       |
| unknown | NA | NA | NA | SJC_S005767 | NA | NA | NA | Sjp_0108840.1 | NA                    | NA       |
| unknown | NA | NA | NA | SJC_S005768 | NA | NA | NA | Sjp_0108850.1 | NA                    | NA       |
| unknown | NA | NA | NA | SJC_S005769 | NA | NA | NA | Sjp_0108860.1 | biological regulation | 0.76396  |
| unknown | NA | NA | NA | SJC_S005770 | NA | NA | NA | Sjp_0108870.1 | cell part             | 0.009037 |
| unknown | NA | NA | NA | SJC_S005771 | NA | NA | NA | Sjp_0108880.1 | NA                    | NA       |
| unknown | NA | NA | NA | SJC_S005772 | NA | NA | NA | Sjp_0108890.1 | NA                    | NA       |
| unknown | NA | NA | NA | SJC_S005774 | NA | NA | NA | Sjp_0108900.1 | NA                    | NA       |
| unknown | NA | NA | NA | SJC_S005780 | NA | NA | NA | Sjp_0108910.1 | NA                    | NA       |

|              |    |          |          |             |      |       |    |               |                                    |          |
|--------------|----|----------|----------|-------------|------|-------|----|---------------|------------------------------------|----------|
| unknown      | NA | NA       | NA       | SJC_S005780 | NA   | NA    | NA | Sjp_0108920.1 | catalytic activity                 | 0.035844 |
| unknown      | NA | NA       | NA       | SJC_S005781 | NA   | NA    | NA | Sjp_0108930.1 | NA                                 | NA       |
| unknown      | NA | NA       | NA       | SJC_S005781 | NA   | NA    | NA | Sjp_0108940.1 | cell part                          | 0.009037 |
| unknown      | NA | NA       | NA       | SJC_S005782 | NA   | NA    | NA | Sjp_0108950.1 | NA                                 | NA       |
| unknown      | NA | NA       | NA       | SJC_S005782 | NA   | NA    | NA | Sjp_0108960.1 | catalytic activity                 | 0.035844 |
| unknown      | NA | NA       | NA       | SJC_S005783 | NA   | NA    | NA | Sjp_0108970.1 | NA                                 | NA       |
| unknown      | NA | NA       | NA       | SJC_S005785 | NA   | NA    | NA | Sjp_0108980.1 | NA                                 | NA       |
| unknown      | NA | NA       | NA       | SJC_S005787 | NA   | NA    | NA | Sjp_0108990.1 | NA                                 | NA       |
| HSB10kb_1380 | 1  | 11839353 | 11855791 | SJC_S005791 | 1319 | 19160 | -  | Sjp_0109000.1 | binding                            | 0.052762 |
| unknown      | NA | NA       | NA       | SJC_S005792 | NA   | NA    | NA | Sjp_0109010.1 | NA                                 | NA       |
| unknown      | NA | NA       | NA       | SJC_S005793 | NA   | NA    | NA | Sjp_0109020.1 | NA                                 | NA       |
| unknown      | NA | NA       | NA       | SJC_S005794 | NA   | NA    | NA | Sjp_0109030.1 | NA                                 | NA       |
| unknown      | NA | NA       | NA       | SJC_S005797 | NA   | NA    | NA | Sjp_0109040.1 | biological regulation              | 0.76396  |
| unknown      | NA | NA       | NA       | SJC_S005800 | NA   | NA    | NA | Sjp_0109050.1 | transporter activity               | 0.782    |
| unknown      | NA | NA       | NA       | SJC_S005801 | NA   | NA    | NA | Sjp_0109060.1 | NA                                 | NA       |
| unknown      | NA | NA       | NA       | SJC_S005805 | NA   | NA    | NA | Sjp_0109080.1 | NA                                 | NA       |
| unknown      | NA | NA       | NA       | SJC_S005806 | NA   | NA    | NA | Sjp_0109090.1 | catalytic activity                 | 0.035844 |
| unknown      | NA | NA       | NA       | SJC_S005807 | NA   | NA    | NA | Sjp_0109100.1 | NA                                 | NA       |
| unknown      | NA | NA       | NA       | SJC_S005812 | NA   | NA    | NA | Sjp_0109110.1 | NA                                 | NA       |
| unknown      | NA | NA       | NA       | SJC_S005813 | NA   | NA    | NA | Sjp_0109120.1 | NA                                 | NA       |
| unknown      | NA | NA       | NA       | SJC_S005820 | NA   | NA    | NA | Sjp_0109140.1 | NA                                 | NA       |
| unknown      | NA | NA       | NA       | SJC_S005825 | NA   | NA    | NA | Sjp_0109150.1 | NA                                 | NA       |
| unknown      | NA | NA       | NA       | SJC_S005828 | NA   | NA    | NA | Sjp_0109160.1 | response to stimulus               | NA       |
| unknown      | NA | NA       | NA       | SJC_S005828 | NA   | NA    | NA | Sjp_0109170.1 | NA                                 | NA       |
| unknown      | NA | NA       | NA       | SJC_S005830 | NA   | NA    | NA | Sjp_0109180.1 | NA                                 | NA       |
| unknown      | NA | NA       | NA       | SJC_S005832 | NA   | NA    | NA | Sjp_0109190.1 | NA                                 | NA       |
| unknown      | NA | NA       | NA       | SJC_S005844 | NA   | NA    | NA | Sjp_0109200.1 | catalytic activity                 | 0.035844 |
| unknown      | NA | NA       | NA       | SJC_S005847 | NA   | NA    | NA | Sjp_0109210.1 | NA                                 | NA       |
| unknown      | NA | NA       | NA       | SJC_S005853 | NA   | NA    | NA | Sjp_0109220.1 | cellular component organization or | NA       |

|         |    |    |    |             |    |    |    |               |                      |          |
|---------|----|----|----|-------------|----|----|----|---------------|----------------------|----------|
|         |    |    |    |             |    |    |    |               | biogenesis           |          |
| unknown | NA | NA | NA | SJC_S005854 | NA | NA | NA | Sjp_0109230.1 | NA                   | NA       |
| unknown | NA | NA | NA | SJC_S005867 | NA | NA | NA | Sjp_0109240.1 | NA                   | NA       |
| unknown | NA | NA | NA | SJC_S005867 | NA | NA | NA | Sjp_0109250.1 | NA                   | NA       |
| unknown | NA | NA | NA | SJC_S005869 | NA | NA | NA | Sjp_0109260.1 | cell part            | 0.009037 |
| unknown | NA | NA | NA | SJC_S005874 | NA | NA | NA | Sjp_0109270.1 | NA                   | NA       |
| unknown | NA | NA | NA | SJC_S005880 | NA | NA | NA | Sjp_0109290.1 | NA                   | NA       |
| unknown | NA | NA | NA | SJC_S005884 | NA | NA | NA | Sjp_0109300.1 | catalytic activity   | 0.035844 |
| unknown | NA | NA | NA | SJC_S005885 | NA | NA | NA | Sjp_0109310.1 | NA                   | NA       |
| unknown | NA | NA | NA | SJC_S005915 | NA | NA | NA | Sjp_0109320.1 | NA                   | NA       |
| unknown | NA | NA | NA | SJC_S005920 | NA | NA | NA | Sjp_0109330.1 | NA                   | NA       |
| unknown | NA | NA | NA | SJC_S005922 | NA | NA | NA | Sjp_0109340.1 | NA                   | NA       |
| unknown | NA | NA | NA | SJC_S005935 | NA | NA | NA | Sjp_0109350.1 | transporter activity | 0.782    |
| unknown | NA | NA | NA | SJC_S005936 | NA | NA | NA | Sjp_0109360.1 | NA                   | NA       |
| unknown | NA | NA | NA | SJC_S005941 | NA | NA | NA | Sjp_0109370.1 | NA                   | NA       |
| unknown | NA | NA | NA | SJC_S005942 | NA | NA | NA | Sjp_0109380.1 | cellular process     | 0.63852  |
| unknown | NA | NA | NA | SJC_S005950 | NA | NA | NA | Sjp_0109390.1 | NA                   | NA       |
| unknown | NA | NA | NA | SJC_S005955 | NA | NA | NA | Sjp_0109400.1 | NA                   | NA       |
| unknown | NA | NA | NA | SJC_S005968 | NA | NA | NA | Sjp_0109410.1 | NA                   | NA       |
| unknown | NA | NA | NA | SJC_S005984 | NA | NA | NA | Sjp_0109420.1 | cell part            | 0.009037 |
| unknown | NA | NA | NA | SJC_S005987 | NA | NA | NA | Sjp_0109430.1 | cell part            | 0.009037 |
| unknown | NA | NA | NA | SJC_S005992 | NA | NA | NA | Sjp_0109440.1 | NA                   | NA       |
| unknown | NA | NA | NA | SJC_S005996 | NA | NA | NA | Sjp_0109450.1 | NA                   | NA       |
| unknown | NA | NA | NA | SJC_S006001 | NA | NA | NA | Sjp_0109460.1 | NA                   | NA       |
| unknown | NA | NA | NA | SJC_S006024 | NA | NA | NA | Sjp_0109470.1 | catalytic activity   | 0.035844 |
| unknown | NA | NA | NA | SJC_S006048 | NA | NA | NA | Sjp_0109490.1 | NA                   | NA       |
| unknown | NA | NA | NA | SJC_S006049 | NA | NA | NA | Sjp_0109500.1 | cell part            | 0.009037 |
| unknown | NA | NA | NA | SJC_S006070 | NA | NA | NA | Sjp_0109510.1 | NA                   | NA       |
| unknown | NA | NA | NA | SJC_S006072 | NA | NA | NA | Sjp_0109520.1 | cell part            | 0.009037 |
| unknown | NA | NA | NA | SJC_S006073 | NA | NA | NA | Sjp_0109530.1 | NA                   | NA       |
| unknown | NA | NA | NA | SJC_S006080 | NA | NA | NA | Sjp_0109540.1 | NA                   | NA       |
| unknown | NA | NA | NA | SJC_S006097 | NA | NA | NA | Sjp_0109550.1 | NA                   | NA       |
| unknown | NA | NA | NA | SJC_S006108 | NA | NA | NA | Sjp_0109560.1 | NA                   | NA       |

|         |    |    |    |             |    |    |    |               |                           |          |
|---------|----|----|----|-------------|----|----|----|---------------|---------------------------|----------|
| unknown | NA | NA | NA | SJC_S006111 | NA | NA | NA | Sjp_0109570.1 | NA                        | NA       |
| unknown | NA | NA | NA | SJC_S006115 | NA | NA | NA | Sjp_0109580.1 | NA                        | NA       |
| unknown | NA | NA | NA | SJC_S006132 | NA | NA | NA | Sjp_0109590.1 | NA                        | NA       |
| unknown | NA | NA | NA | SJC_S006140 | NA | NA | NA | Sjp_0109600.1 | NA                        | NA       |
| unknown | NA | NA | NA | SJC_S006144 | NA | NA | NA | Sjp_0109610.1 | cell part                 | 0.009037 |
| unknown | NA | NA | NA | SJC_S006145 | NA | NA | NA | Sjp_0109620.1 | NA                        | NA       |
| unknown | NA | NA | NA | SJC_S006154 | NA | NA | NA | Sjp_0109630.1 | catalytic activity        | 0.035844 |
| unknown | NA | NA | NA | SJC_S006167 | NA | NA | NA | Sjp_0109640.1 | binding                   | 0.052762 |
| unknown | NA | NA | NA | SJC_S006246 | NA | NA | NA | Sjp_0109650.1 | NA                        | NA       |
| unknown | NA | NA | NA | SJC_S006265 | NA | NA | NA | Sjp_0109660.1 | NA                        | NA       |
| unknown | NA | NA | NA | SJC_S006283 | NA | NA | NA | Sjp_0109670.1 | cell part                 | 0.009037 |
| unknown | NA | NA | NA | SJC_S006295 | NA | NA | NA | Sjp_0109680.1 | transporter activity      | 0.782    |
| unknown | NA | NA | NA | SJC_S006308 | NA | NA | NA | Sjp_0109690.1 | NA                        | NA       |
| unknown | NA | NA | NA | SJC_S006320 | NA | NA | NA | Sjp_0109700.1 | NA                        | NA       |
| unknown | NA | NA | NA | SJC_S006323 | NA | NA | NA | Sjp_0109710.1 | cellular process          | 0.63852  |
| unknown | NA | NA | NA | SJC_S006332 | NA | NA | NA | Sjp_0109720.1 | NA                        | NA       |
| unknown | NA | NA | NA | SJC_S006336 | NA | NA | NA | Sjp_0109730.1 | NA                        | NA       |
| unknown | NA | NA | NA | SJC_S006343 | NA | NA | NA | Sjp_0109740.1 | enzyme regulator activity | 0.1755   |
| unknown | NA | NA | NA | SJC_S006350 | NA | NA | NA | Sjp_0109750.1 | NA                        | NA       |
| unknown | NA | NA | NA | SJC_S006366 | NA | NA | NA | Sjp_0109760.1 | NA                        | NA       |
| unknown | NA | NA | NA | SJC_S006376 | NA | NA | NA | Sjp_0109770.1 | NA                        | NA       |
| unknown | NA | NA | NA | SJC_S006396 | NA | NA | NA | Sjp_0109780.1 | NA                        | NA       |
| unknown | NA | NA | NA | SJC_S006422 | NA | NA | NA | Sjp_0109790.1 | cell part                 | 0.009037 |
| unknown | NA | NA | NA | SJC_S006426 | NA | NA | NA | Sjp_0109800.1 | NA                        | NA       |
| unknown | NA | NA | NA | SJC_S006444 | NA | NA | NA | Sjp_0109810.1 | cell part                 | 0.009037 |
| unknown | NA | NA | NA | SJC_S006445 | NA | NA | NA | Sjp_0109820.1 | NA                        | NA       |
| unknown | NA | NA | NA | SJC_S006462 | NA | NA | NA | Sjp_0109830.1 | NA                        | NA       |
| unknown | NA | NA | NA | SJC_S006476 | NA | NA | NA | Sjp_0109860.1 | NA                        | NA       |
| unknown | NA | NA | NA | SJC_S006477 | NA | NA | NA | Sjp_0109870.1 | binding                   | 0.052762 |
| unknown | NA | NA | NA | SJC_S006482 | NA | NA | NA | Sjp_0109880.1 | catalytic activity        | 0.035844 |
| unknown | NA | NA | NA | SJC_S006487 | NA | NA | NA | Sjp_0109890.1 | catalytic activity        | 0.035844 |

|         |    |    |    |             |    |    |    |               |                    |          |
|---------|----|----|----|-------------|----|----|----|---------------|--------------------|----------|
| unknown | NA | NA | NA | SJC_S006494 | NA | NA | NA | Sjp_0109900.1 | NA                 | NA       |
| unknown | NA | NA | NA | SJC_S006496 | NA | NA | NA | Sjp_0109910.1 | NA                 | NA       |
| unknown | NA | NA | NA | SJC_S006506 | NA | NA | NA | Sjp_0109920.1 | NA                 | NA       |
| unknown | NA | NA | NA | SJC_S006507 | NA | NA | NA | Sjp_0109930.1 | NA                 | NA       |
| unknown | NA | NA | NA | SJC_S006510 | NA | NA | NA | Sjp_0109940.1 | NA                 | NA       |
| unknown | NA | NA | NA | SJC_S006525 | NA | NA | NA | Sjp_0109950.1 | NA                 | NA       |
| unknown | NA | NA | NA | SJC_S006537 | NA | NA | NA | Sjp_0109960.1 | NA                 | NA       |
| unknown | NA | NA | NA | SJC_S006539 | NA | NA | NA | Sjp_0109970.1 | NA                 | NA       |
| unknown | NA | NA | NA | SJC_S006544 | NA | NA | NA | Sjp_0109980.1 | cell part          | 0.009037 |
| unknown | NA | NA | NA | SJC_S006551 | NA | NA | NA | Sjp_0109990.1 | cellular process   | 0.63852  |
| unknown | NA | NA | NA | SJC_S006586 | NA | NA | NA | Sjp_0110000.1 | cellular process   | 0.63852  |
| unknown | NA | NA | NA | SJC_S006626 | NA | NA | NA | Sjp_0110010.1 | NA                 | NA       |
| unknown | NA | NA | NA | SJC_S006627 | NA | NA | NA | Sjp_0110020.1 | NA                 | NA       |
| unknown | NA | NA | NA | SJC_S006647 | NA | NA | NA | Sjp_0110030.1 | NA                 | NA       |
| unknown | NA | NA | NA | SJC_S006656 | NA | NA | NA | Sjp_0110040.1 | catalytic activity | 0.035844 |
| unknown | NA | NA | NA | SJC_S006675 | NA | NA | NA | Sjp_0110050.1 | NA                 | NA       |
| unknown | NA | NA | NA | SJC_S006706 | NA | NA | NA | Sjp_0110060.1 | NA                 | NA       |
| unknown | NA | NA | NA | SJC_S006721 | NA | NA | NA | Sjp_0110070.1 | NA                 | NA       |
| unknown | NA | NA | NA | SJC_S006725 | NA | NA | NA | Sjp_0110080.1 | NA                 | NA       |
| unknown | NA | NA | NA | SJC_S006734 | NA | NA | NA | Sjp_0110090.1 | catalytic activity | 0.035844 |
| unknown | NA | NA | NA | SJC_S006746 | NA | NA | NA | Sjp_0110100.1 | catalytic activity | 0.035844 |
| unknown | NA | NA | NA | SJC_S006754 | NA | NA | NA | Sjp_0110110.1 | NA                 | NA       |
| unknown | NA | NA | NA | SJC_S006757 | NA | NA | NA | Sjp_0110120.1 | NA                 | NA       |
| unknown | NA | NA | NA | SJC_S006759 | NA | NA | NA | Sjp_0110130.1 | NA                 | NA       |
| unknown | NA | NA | NA | SJC_S006762 | NA | NA | NA | Sjp_0110140.1 | catalytic activity | 0.035844 |
| unknown | NA | NA | NA | SJC_S006764 | NA | NA | NA | Sjp_0110150.1 | NA                 | NA       |
| unknown | NA | NA | NA | SJC_S006765 | NA | NA | NA | Sjp_0110160.1 | NA                 | NA       |
| unknown | NA | NA | NA | SJC_S006768 | NA | NA | NA | Sjp_0110170.1 | NA                 | NA       |
| unknown | NA | NA | NA | SJC_S006775 | NA | NA | NA | Sjp_0110180.1 | cell part          | 0.009037 |
| unknown | NA | NA | NA | SJC_S006784 | NA | NA | NA | Sjp_0110190.1 | NA                 | NA       |
| unknown | NA | NA | NA | SJC_S006796 | NA | NA | NA | Sjp_0110200.1 | NA                 | NA       |
| unknown | NA | NA | NA | SJC_S006804 | NA | NA | NA | Sjp_0110210.1 | NA                 | NA       |
| unknown | NA | NA | NA | SJC_S006815 | NA | NA | NA | Sjp_0110220.1 | catalytic activity | 0.035844 |
| unknown | NA | NA | NA | SJC_S006827 | NA | NA | NA | Sjp_0110230.1 | NA                 | NA       |

|         |    |    |    |             |    |    |    |               |                                               |          |
|---------|----|----|----|-------------|----|----|----|---------------|-----------------------------------------------|----------|
| unknown | NA | NA | NA | SJC_S006834 | NA | NA | NA | Sjp_0110250.1 | NA                                            | NA       |
| unknown | NA | NA | NA | SJC_S006840 | NA | NA | NA | Sjp_0110260.1 | cell part                                     | 0.009037 |
| unknown | NA | NA | NA | SJC_S006850 | NA | NA | NA | Sjp_0110270.1 | NA                                            | NA       |
| unknown | NA | NA | NA | SJC_S006858 | NA | NA | NA | Sjp_0110280.1 | catalytic activity                            | 0.035844 |
| unknown | NA | NA | NA | SJC_S006862 | NA | NA | NA | Sjp_0110290.1 | NA                                            | NA       |
| unknown | NA | NA | NA | SJC_S006870 | NA | NA | NA | Sjp_0110300.1 | NA                                            | NA       |
| unknown | NA | NA | NA | SJC_S006875 | NA | NA | NA | Sjp_0110310.1 | NA                                            | NA       |
| unknown | NA | NA | NA | SJC_S006879 | NA | NA | NA | Sjp_0110320.1 | NA                                            | NA       |
| unknown | NA | NA | NA | SJC_S006908 | NA | NA | NA | Sjp_0110340.1 | NA                                            | NA       |
| unknown | NA | NA | NA | SJC_S006935 | NA | NA | NA | Sjp_0110350.1 | NA                                            | NA       |
| unknown | NA | NA | NA | SJC_S006941 | NA | NA | NA | Sjp_0110360.1 | catalytic activity                            | 0.035844 |
| unknown | NA | NA | NA | SJC_S006944 | NA | NA | NA | Sjp_0110370.1 | NA                                            | NA       |
| unknown | NA | NA | NA | SJC_S006948 | NA | NA | NA | Sjp_0110380.1 | NA                                            | NA       |
| unknown | NA | NA | NA | SJC_S006966 | NA | NA | NA | Sjp_0110390.1 | NA                                            | NA       |
| unknown | NA | NA | NA | SJC_S006976 | NA | NA | NA | Sjp_0110400.1 | NA                                            | NA       |
| unknown | NA | NA | NA | SJC_S006977 | NA | NA | NA | Sjp_0110410.1 | NA                                            | NA       |
| unknown | NA | NA | NA | SJC_S006985 | NA | NA | NA | Sjp_0110420.1 | cell part                                     | 0.009037 |
| unknown | NA | NA | NA | SJC_S007043 | NA | NA | NA | Sjp_0110430.1 | catalytic activity                            | 0.035844 |
| unknown | NA | NA | NA | SJC_S007055 | NA | NA | NA | Sjp_0110440.1 | NA                                            | NA       |
| unknown | NA | NA | NA | SJC_S007056 | NA | NA | NA | Sjp_0110450.1 | NA                                            | NA       |
| unknown | NA | NA | NA | SJC_S007056 | NA | NA | NA | Sjp_0110460.1 | NA                                            | NA       |
| unknown | NA | NA | NA | SJC_S007058 | NA | NA | NA | Sjp_0110470.1 | binding                                       | 0.052762 |
| unknown | NA | NA | NA | SJC_S007060 | NA | NA | NA | Sjp_0110480.1 | NA                                            | NA       |
| unknown | NA | NA | NA | SJC_S007064 | NA | NA | NA | Sjp_0110490.1 | NA                                            | NA       |
| unknown | NA | NA | NA | SJC_S007065 | NA | NA | NA | Sjp_0110500.1 | NA                                            | NA       |
| unknown | NA | NA | NA | SJC_S007066 | NA | NA | NA | Sjp_0110510.1 | NA                                            | NA       |
| unknown | NA | NA | NA | SJC_S007073 | NA | NA | NA | Sjp_0110520.1 | NA                                            | NA       |
| unknown | NA | NA | NA | SJC_S007081 | NA | NA | NA | Sjp_0110540.1 | NA                                            | NA       |
| unknown | NA | NA | NA | SJC_S007088 | NA | NA | NA | Sjp_0110550.1 | cellular component organization or biogenesis | NA       |
| unknown | NA | NA | NA | SJC_S007091 | NA | NA | NA | Sjp_0110560.1 | binding                                       | 0.052762 |
| unknown | NA | NA | NA | SJC_S007096 | NA | NA | NA | Sjp_0110570.1 | NA                                            | NA       |

|         |    |    |    |             |    |    |    |               |                                               |          |
|---------|----|----|----|-------------|----|----|----|---------------|-----------------------------------------------|----------|
| unknown | NA | NA | NA | SJC_S007101 | NA | NA | NA | Sjp_0110580.1 | NA                                            | NA       |
| unknown | NA | NA | NA | SJC_S007106 | NA | NA | NA | Sjp_0110590.1 | NA                                            | NA       |
| unknown | NA | NA | NA | SJC_S007122 | NA | NA | NA | Sjp_0110600.1 | NA                                            | NA       |
| unknown | NA | NA | NA | SJC_S007125 | NA | NA | NA | Sjp_0110610.1 | catalytic activity                            | 0.035844 |
| unknown | NA | NA | NA | SJC_S007127 | NA | NA | NA | Sjp_0110620.1 | NA                                            | NA       |
| unknown | NA | NA | NA | SJC_S007129 | NA | NA | NA | Sjp_0110630.1 | transporter activity                          | 0.782    |
| unknown | NA | NA | NA | SJC_S007132 | NA | NA | NA | Sjp_0110640.1 | NA                                            | NA       |
| unknown | NA | NA | NA | SJC_S007141 | NA | NA | NA | Sjp_0110650.1 | biological regulation                         | 0.76396  |
| unknown | NA | NA | NA | SJC_S007143 | NA | NA | NA | Sjp_0110660.1 | catalytic activity                            | 0.035844 |
| unknown | NA | NA | NA | SJC_S007148 | NA | NA | NA | Sjp_0110670.1 | NA                                            | NA       |
| unknown | NA | NA | NA | SJC_S007149 | NA | NA | NA | Sjp_0110680.1 | NA                                            | NA       |
| unknown | NA | NA | NA | SJC_S007150 | NA | NA | NA | Sjp_0110690.1 | NA                                            | NA       |
| unknown | NA | NA | NA | SJC_S007152 | NA | NA | NA | Sjp_0110700.1 | NA                                            | NA       |
| unknown | NA | NA | NA | SJC_S007157 | NA | NA | NA | Sjp_0110710.1 | NA                                            | NA       |
| unknown | NA | NA | NA | SJC_S007161 | NA | NA | NA | Sjp_0110720.1 | NA                                            | NA       |
| unknown | NA | NA | NA | SJC_S007165 | NA | NA | NA | Sjp_0110730.1 | cell part                                     | 0.009037 |
| unknown | NA | NA | NA | SJC_S007190 | NA | NA | NA | Sjp_0110740.1 | NA                                            | NA       |
| unknown | NA | NA | NA | SJC_S007194 | NA | NA | NA | Sjp_0110750.1 | NA                                            | NA       |
| unknown | NA | NA | NA | SJC_S007199 | NA | NA | NA | Sjp_0110760.1 | catalytic activity                            | 0.035844 |
| unknown | NA | NA | NA | SJC_S007205 | NA | NA | NA | Sjp_0110770.1 | NA                                            | NA       |
| unknown | NA | NA | NA | SJC_S007213 | NA | NA | NA | Sjp_0110780.1 | NA                                            | NA       |
| unknown | NA | NA | NA | SJC_S007220 | NA | NA | NA | Sjp_0110790.1 | NA                                            | NA       |
| unknown | NA | NA | NA | SJC_S007229 | NA | NA | NA | Sjp_0110800.1 | binding                                       | 0.052762 |
| unknown | NA | NA | NA | SJC_S007246 | NA | NA | NA | Sjp_0110810.1 | NA                                            | NA       |
| unknown | NA | NA | NA | SJC_S007250 | NA | NA | NA | Sjp_0110820.1 | NA                                            | NA       |
| unknown | NA | NA | NA | SJC_S007271 | NA | NA | NA | Sjp_0110830.1 | NA                                            | NA       |
| unknown | NA | NA | NA | SJC_S007283 | NA | NA | NA | Sjp_0110840.1 | NA                                            | NA       |
| unknown | NA | NA | NA | SJC_S007293 | NA | NA | NA | Sjp_0110850.1 | NA                                            | NA       |
| unknown | NA | NA | NA | SJC_S007296 | NA | NA | NA | Sjp_0110860.1 | NA                                            | NA       |
| unknown | NA | NA | NA | SJC_S007303 | NA | NA | NA | Sjp_0110870.1 | protein binding transcription factor activity | NA       |



|         |    |    |    |             |    |    |    |               |                       |          |
|---------|----|----|----|-------------|----|----|----|---------------|-----------------------|----------|
| unknown | NA | NA | NA | SJC_S007307 | NA | NA | NA | Sjp_0110880.1 | NA                    | NA       |
| unknown | NA | NA | NA | SJC_S007308 | NA | NA | NA | Sjp_0110890.1 | NA                    | NA       |
| unknown | NA | NA | NA | SJC_S007339 | NA | NA | NA | Sjp_0110900.1 | NA                    | NA       |
| unknown | NA | NA | NA | SJC_S007340 | NA | NA | NA | Sjp_0110910.1 | NA                    | NA       |
| unknown | NA | NA | NA | SJC_S007341 | NA | NA | NA | Sjp_0110920.1 | transporter activity  | 0.782    |
| unknown | NA | NA | NA | SJC_S007343 | NA | NA | NA | Sjp_0110930.1 | NA                    | NA       |
| unknown | NA | NA | NA | SJC_S007357 | NA | NA | NA | Sjp_0110940.1 | NA                    | NA       |
| unknown | NA | NA | NA | SJC_S007373 | NA | NA | NA | Sjp_0110950.1 | NA                    | NA       |
| unknown | NA | NA | NA | SJC_S007378 | NA | NA | NA | Sjp_0110960.1 | binding               | 0.052762 |
| unknown | NA | NA | NA | SJC_S007389 | NA | NA | NA | Sjp_0110970.1 | transporter activity  | 0.782    |
| unknown | NA | NA | NA | SJC_S007393 | NA | NA | NA | Sjp_0110980.1 | NA                    | NA       |
| unknown | NA | NA | NA | SJC_S007396 | NA | NA | NA | Sjp_0110990.1 | NA                    | NA       |
| unknown | NA | NA | NA | SJC_S007401 | NA | NA | NA | Sjp_0111000.1 | catalytic activity    | 0.035844 |
| unknown | NA | NA | NA | SJC_S007404 | NA | NA | NA | Sjp_0111010.1 | catalytic activity    | 0.035844 |
| unknown | NA | NA | NA | SJC_S007418 | NA | NA | NA | Sjp_0111020.1 | metabolic process     | 0.41934  |
| unknown | NA | NA | NA | SJC_S007419 | NA | NA | NA | Sjp_0111030.1 | NA                    | NA       |
| unknown | NA | NA | NA | SJC_S007420 | NA | NA | NA | Sjp_0111040.1 | catalytic activity    | 0.035844 |
| unknown | NA | NA | NA | SJC_S007421 | NA | NA | NA | Sjp_0111050.1 | NA                    | NA       |
| unknown | NA | NA | NA | SJC_S007422 | NA | NA | NA | Sjp_0111060.1 | NA                    | NA       |
| unknown | NA | NA | NA | SJC_S007423 | NA | NA | NA | Sjp_0111070.1 | NA                    | NA       |
| unknown | NA | NA | NA | SJC_S007424 | NA | NA | NA | Sjp_0111080.1 | NA                    | NA       |
| unknown | NA | NA | NA | SJC_S007425 | NA | NA | NA | Sjp_0111090.1 | NA                    | NA       |
| unknown | NA | NA | NA | SJC_S007432 | NA | NA | NA | Sjp_0111100.1 | NA                    | NA       |
| unknown | NA | NA | NA | SJC_S007436 | NA | NA | NA | Sjp_0111110.1 | biological regulation | 0.76396  |
| unknown | NA | NA | NA | SJC_S007445 | NA | NA | NA | Sjp_0111120.1 | NA                    | NA       |
| unknown | NA | NA | NA | SJC_S007448 | NA | NA | NA | Sjp_0111130.1 | NA                    | NA       |
| unknown | NA | NA | NA | SJC_S007450 | NA | NA | NA | Sjp_0111140.1 | NA                    | NA       |
| unknown | NA | NA | NA | SJC_S007459 | NA | NA | NA | Sjp_0111150.1 | NA                    | NA       |
| unknown | NA | NA | NA | SJC_S007463 | NA | NA | NA | Sjp_0111160.1 | NA                    | NA       |
| unknown | NA | NA | NA | SJC_S007467 | NA | NA | NA | Sjp_0111170.1 | binding               | 0.052762 |

|         |    |    |    |             |    |    |    |               |                               |          |
|---------|----|----|----|-------------|----|----|----|---------------|-------------------------------|----------|
| unknown | NA | NA | NA | SJC_S007469 | NA | NA | NA | Sjp_0111180.1 | NA                            | NA       |
| unknown | NA | NA | NA | SJC_S007474 | NA | NA | NA | Sjp_0111190.1 | NA                            | NA       |
| unknown | NA | NA | NA | SJC_S007478 | NA | NA | NA | Sjp_0111200.1 | NA                            | NA       |
| unknown | NA | NA | NA | SJC_S007484 | NA | NA | NA | Sjp_0111210.1 | NA                            | NA       |
| unknown | NA | NA | NA | SJC_S007487 | NA | NA | NA | Sjp_0111220.1 | NA                            | NA       |
| unknown | NA | NA | NA | SJC_S007501 | NA | NA | NA | Sjp_0111230.1 | cell part                     | 0.009037 |
| unknown | NA | NA | NA | SJC_S007510 | NA | NA | NA | Sjp_0111240.1 | NA                            | NA       |
| unknown | NA | NA | NA | SJC_S007514 | NA | NA | NA | Sjp_0111250.1 | NA                            | NA       |
| unknown | NA | NA | NA | SJC_S007517 | NA | NA | NA | Sjp_0111260.1 | cell part                     | 0.009037 |
| unknown | NA | NA | NA | SJC_S007522 | NA | NA | NA | Sjp_0111270.1 | NA                            | NA       |
| unknown | NA | NA | NA | SJC_S007524 | NA | NA | NA | Sjp_0111280.1 | catalytic activity            | 0.035844 |
| unknown | NA | NA | NA | SJC_S007525 | NA | NA | NA | Sjp_0111290.1 | NA                            | NA       |
| unknown | NA | NA | NA | SJC_S007528 | NA | NA | NA | Sjp_0111300.1 | NA                            | NA       |
| unknown | NA | NA | NA | SJC_S007530 | NA | NA | NA | Sjp_0111310.1 | NA                            | NA       |
| unknown | NA | NA | NA | SJC_S007534 | NA | NA | NA | Sjp_0111320.1 | NA                            | NA       |
| unknown | NA | NA | NA | SJC_S007539 | NA | NA | NA | Sjp_0111330.1 | NA                            | NA       |
| unknown | NA | NA | NA | SJC_S007556 | NA | NA | NA | Sjp_0111340.1 | NA                            | NA       |
| unknown | NA | NA | NA | SJC_S007558 | NA | NA | NA | Sjp_0111350.1 | cellular process              | 0.63852  |
| unknown | NA | NA | NA | SJC_S007565 | NA | NA | NA | Sjp_0111360.1 | catalytic activity            | 0.035844 |
| unknown | NA | NA | NA | SJC_S007567 | NA | NA | NA | Sjp_0111370.1 | NA                            | NA       |
| unknown | NA | NA | NA | SJC_S007568 | NA | NA | NA | Sjp_0111380.1 | catalytic activity            | 0.035844 |
| unknown | NA | NA | NA | SJC_S007571 | NA | NA | NA | Sjp_0111390.1 | molecular transducer activity | 0.50162  |
| unknown | NA | NA | NA | SJC_S007574 | NA | NA | NA | Sjp_0111400.1 | catalytic activity            | 0.035844 |
| unknown | NA | NA | NA | SJC_S007582 | NA | NA | NA | Sjp_0111410.1 | NA                            | NA       |
| unknown | NA | NA | NA | SJC_S007586 | NA | NA | NA | Sjp_0111420.1 | NA                            | NA       |
| unknown | NA | NA | NA | SJC_S007592 | NA | NA | NA | Sjp_0111430.1 | NA                            | NA       |
| unknown | NA | NA | NA | SJC_S007596 | NA | NA | NA | Sjp_0111440.1 | NA                            | NA       |
| unknown | NA | NA | NA | SJC_S007597 | NA | NA | NA | Sjp_0111450.1 | NA                            | NA       |
| unknown | NA | NA | NA | SJC_S007598 | NA | NA | NA | Sjp_0111460.1 | NA                            | NA       |
| unknown | NA | NA | NA | SJC_S007601 | NA | NA | NA | Sjp_0111470.1 | binding                       | 0.052762 |
| unknown | NA | NA | NA | SJC_S007602 | NA | NA | NA | Sjp_0111480.1 | NA                            | NA       |
| unknown | NA | NA | NA | SJC_S007604 | NA | NA | NA | Sjp_0111490.1 | NA                            | NA       |

|         |    |    |    |             |    |    |    |               |                       |          |
|---------|----|----|----|-------------|----|----|----|---------------|-----------------------|----------|
| unknown | NA | NA | NA | SJC_S007605 | NA | NA | NA | Sjp_0111510.1 | NA                    | NA       |
| unknown | NA | NA | NA | SJC_S007606 | NA | NA | NA | Sjp_0111520.1 | NA                    | NA       |
| unknown | NA | NA | NA | SJC_S007607 | NA | NA | NA | Sjp_0111530.1 | NA                    | NA       |
| unknown | NA | NA | NA | SJC_S007611 | NA | NA | NA | Sjp_0111540.1 | NA                    | NA       |
| unknown | NA | NA | NA | SJC_S007613 | NA | NA | NA | Sjp_0111550.1 | biological regulation | 0.76396  |
| unknown | NA | NA | NA | SJC_S007614 | NA | NA | NA | Sjp_0111560.1 | NA                    | NA       |
| unknown | NA | NA | NA | SJC_S007615 | NA | NA | NA | Sjp_0111570.1 | NA                    | NA       |
| unknown | NA | NA | NA | SJC_S007617 | NA | NA | NA | Sjp_0111580.1 | NA                    | NA       |
| unknown | NA | NA | NA | SJC_S007624 | NA | NA | NA | Sjp_0111590.1 | biological regulation | 0.76396  |
| unknown | NA | NA | NA | SJC_S007625 | NA | NA | NA | Sjp_0111600.1 | biological regulation | 0.76396  |
| unknown | NA | NA | NA | SJC_S007626 | NA | NA | NA | Sjp_0111610.1 | NA                    | NA       |
| unknown | NA | NA | NA | SJC_S007626 | NA | NA | NA | Sjp_0111620.1 | NA                    | NA       |
| unknown | NA | NA | NA | SJC_S007627 | NA | NA | NA | Sjp_0111630.1 | response to stimulus  | NA       |
| unknown | NA | NA | NA | SJC_S007632 | NA | NA | NA | Sjp_0111640.1 | NA                    | NA       |
| unknown | NA | NA | NA | SJC_S007637 | NA | NA | NA | Sjp_0111650.1 | NA                    | NA       |
| unknown | NA | NA | NA | SJC_S007640 | NA | NA | NA | Sjp_0111660.1 | NA                    | NA       |
| unknown | NA | NA | NA | SJC_S007643 | NA | NA | NA | Sjp_0111670.1 | NA                    | NA       |
| unknown | NA | NA | NA | SJC_S007651 | NA | NA | NA | Sjp_0111680.1 | NA                    | NA       |
| unknown | NA | NA | NA | SJC_S007653 | NA | NA | NA | Sjp_0111690.1 | locomotion            | NA       |
| unknown | NA | NA | NA | SJC_S007655 | NA | NA | NA | Sjp_0111700.1 | biological regulation | 0.76396  |
| unknown | NA | NA | NA | SJC_S007658 | NA | NA | NA | Sjp_0111710.1 | NA                    | NA       |
| unknown | NA | NA | NA | SJC_S007662 | NA | NA | NA | Sjp_0111720.1 | catalytic activity    | 0.035844 |
| unknown | NA | NA | NA | SJC_S007670 | NA | NA | NA | Sjp_0111730.1 | NA                    | NA       |
| unknown | NA | NA | NA | SJC_S007671 | NA | NA | NA | Sjp_0111740.1 | cell part             | 0.009037 |
| unknown | NA | NA | NA | SJC_S007674 | NA | NA | NA | Sjp_0111750.1 | biological regulation | 0.76396  |
| unknown | NA | NA | NA | SJC_S007676 | NA | NA | NA | Sjp_0111760.1 | NA                    | NA       |
| unknown | NA | NA | NA | SJC_S007678 | NA | NA | NA | Sjp_0111770.1 | NA                    | NA       |
| unknown | NA | NA | NA | SJC_S007680 | NA | NA | NA | Sjp_0111780.1 | catalytic activity    | 0.035844 |

|              |    |          |          |             |      |       |    |               |                       |          |
|--------------|----|----------|----------|-------------|------|-------|----|---------------|-----------------------|----------|
| unknown      | NA | NA       | NA       | SJC_S007681 | NA   | NA    | NA | Sjp_0111790.1 | NA                    | NA       |
| unknown      | NA | NA       | NA       | SJC_S007684 | NA   | NA    | NA | Sjp_0111800.1 | NA                    | NA       |
| unknown      | NA | NA       | NA       | SJC_S007689 | NA   | NA    | NA | Sjp_0111810.1 | NA                    | NA       |
| unknown      | NA | NA       | NA       | SJC_S007692 | NA   | NA    | NA | Sjp_0111820.1 | NA                    | NA       |
| unknown      | NA | NA       | NA       | SJC_S007695 | NA   | NA    | NA | Sjp_0111830.1 | biological regulation | 0.76396  |
| unknown      | NA | NA       | NA       | SJC_S007697 | NA   | NA    | NA | Sjp_0111840.1 | NA                    | NA       |
| unknown      | NA | NA       | NA       | SJC_S007700 | NA   | NA    | NA | Sjp_0111850.1 | cell part             | 0.009037 |
| unknown      | NA | NA       | NA       | SJC_S007701 | NA   | NA    | NA | Sjp_0111860.1 | NA                    | NA       |
| unknown      | NA | NA       | NA       | SJC_S007704 | NA   | NA    | NA | Sjp_0111870.1 | NA                    | NA       |
| unknown      | NA | NA       | NA       | SJC_S007707 | NA   | NA    | NA | Sjp_0111880.1 | cell part             | 0.009037 |
| unknown      | NA | NA       | NA       | SJC_S007708 | NA   | NA    | NA | Sjp_0111890.1 | biological regulation | 0.76396  |
| unknown      | NA | NA       | NA       | SJC_S007710 | NA   | NA    | NA | Sjp_0111900.1 | NA                    | NA       |
| unknown      | NA | NA       | NA       | SJC_S007714 | NA   | NA    | NA | Sjp_0111910.1 | NA                    | NA       |
| unknown      | NA | NA       | NA       | SJC_S007715 | NA   | NA    | NA | Sjp_0111920.1 | NA                    | NA       |
| unknown      | NA | NA       | NA       | SJC_S007716 | NA   | NA    | NA | Sjp_0111930.1 | cell part             | 0.009037 |
| unknown      | NA | NA       | NA       | SJC_S007716 | NA   | NA    | NA | Sjp_0111940.1 | cell part             | 0.009037 |
| unknown      | NA | NA       | NA       | SJC_S007717 | NA   | NA    | NA | Sjp_0111950.1 | cellular process      | 0.63852  |
| unknown      | NA | NA       | NA       | SJC_S007718 | NA   | NA    | NA | Sjp_0111960.1 | NA                    | NA       |
| unknown      | NA | NA       | NA       | SJC_S007719 | NA   | NA    | NA | Sjp_0111970.1 | NA                    | NA       |
| unknown      | NA | NA       | NA       | SJC_S007719 | NA   | NA    | NA | Sjp_0111980.1 | NA                    | NA       |
| HSB10kb_1381 | 1  | 24444709 | 24462405 | SJC_S007720 | 1448 | 21466 | -  | NA            | NA                    | NA       |
| unknown      | NA | NA       | NA       | SJC_S007721 | NA   | NA    | NA | Sjp_0112000.1 | NA                    | NA       |
| unknown      | NA | NA       | NA       | SJC_S007722 | NA   | NA    | NA | Sjp_0112010.1 | biological regulation | 0.76396  |
| unknown      | NA | NA       | NA       | SJC_S007722 | NA   | NA    | NA | Sjp_0112020.1 | cellular process      | 0.63852  |
| unknown      | NA | NA       | NA       | SJC_S007722 | NA   | NA    | NA | Sjp_0112030.1 | NA                    | NA       |
| unknown      | NA | NA       | NA       | SJC_S007723 | NA   | NA    | NA | Sjp_0112040.1 | catalytic activity    | 0.035844 |
| unknown      | NA | NA       | NA       | SJC_S007725 | NA   | NA    | NA | Sjp_0112050.1 | NA                    | NA       |
| unknown      | NA | NA       | NA       | SJC_S007725 | NA   | NA    | NA | Sjp_0112060.1 | catalytic activity    | 0.035844 |
| unknown      | NA | NA       | NA       | SJC_S007728 | NA   | NA    | NA | Sjp_0112070.1 | catalytic activity    | 0.035844 |
| unknown      | NA | NA       | NA       | SJC_S007729 | NA   | NA    | NA | Sjp_0112080.1 | NA                    | NA       |
| unknown      | NA | NA       | NA       | SJC_S007729 | NA   | NA    | NA | Sjp_0112090.1 | NA                    | NA       |

|              |    |          |          |             |      |       |    |               |                       |          |
|--------------|----|----------|----------|-------------|------|-------|----|---------------|-----------------------|----------|
| unknown      | NA | NA       | NA       | SJC_S007730 | NA   | NA    | NA | Sjp_0112100.1 | NA                    | NA       |
| unknown      | NA | NA       | NA       | SJC_S007731 | NA   | NA    | NA | Sjp_0112110.1 | NA                    | NA       |
| HSB10kb_1382 | 3  | 10378392 | 10429355 | SJC_S007732 | 300  | 52207 | -  | Sjp_0112120.1 | NA                    | NA       |
| unknown      | NA | NA       | NA       | SJC_S007734 | NA   | NA    | NA | Sjp_0112130.1 | binding               | 0.052762 |
| unknown      | NA | NA       | NA       | SJC_S007735 | NA   | NA    | NA | Sjp_0112140.1 | catalytic activity    | 0.035844 |
| unknown      | NA | NA       | NA       | SJC_S007737 | NA   | NA    | NA | Sjp_0112180.1 | NA                    | NA       |
| unknown      | NA | NA       | NA       | SJC_S007741 | NA   | NA    | NA | Sjp_0112190.1 | binding               | 0.052762 |
| unknown      | NA | NA       | NA       | SJC_S007742 | NA   | NA    | NA | Sjp_0112200.1 | NA                    | NA       |
| HSB10kb_1383 | WZ | 45517011 | 45531135 | SJC_S007743 | 2850 | 15202 | -  | Sjp_0112210.1 | catalytic activity    | 0.035844 |
| unknown      | NA | NA       | NA       | SJC_S007744 | NA   | NA    | NA | Sjp_0112220.1 | NA                    | NA       |
| unknown      | NA | NA       | NA       | SJC_S007749 | NA   | NA    | NA | Sjp_0112230.1 | NA                    | NA       |
| unknown      | NA | NA       | NA       | SJC_S007749 | NA   | NA    | NA | Sjp_0112240.1 | NA                    | NA       |
| HSB10kb_1384 | 3  | 11475349 | 11495010 | SJC_S007750 | 9985 | 24529 | +  | Sjp_0112250.1 | NA                    | NA       |
| unknown      | NA | NA       | NA       | SJC_S007751 | NA   | NA    | NA | Sjp_0112260.1 | NA                    | NA       |
| unknown      | NA | NA       | NA       | SJC_S007754 | NA   | NA    | NA | Sjp_0112270.1 | NA                    | NA       |
| unknown      | NA | NA       | NA       | SJC_S007755 | NA   | NA    | NA | Sjp_0112280.1 | developmental process | NA       |
| unknown      | NA | NA       | NA       | SJC_S007757 | NA   | NA    | NA | Sjp_0112290.1 | NA                    | NA       |
| unknown      | NA | NA       | NA       | SJC_S007759 | NA   | NA    | NA | Sjp_0112300.1 | biological regulation | 0.76396  |
| unknown      | NA | NA       | NA       | SJC_S007766 | NA   | NA    | NA | Sjp_0112310.1 | transporter activity  | 0.782    |
| unknown      | NA | NA       | NA       | SJC_S007769 | NA   | NA    | NA | Sjp_0112320.1 | cell part             | 0.009037 |
| unknown      | NA | NA       | NA       | SJC_S007770 | NA   | NA    | NA | Sjp_0112330.1 | catalytic activity    | 0.035844 |
| unknown      | NA | NA       | NA       | SJC_S007771 | NA   | NA    | NA | Sjp_0112340.1 | NA                    | NA       |
| unknown      | NA | NA       | NA       | SJC_S007771 | NA   | NA    | NA | Sjp_0112350.1 | NA                    | NA       |
| unknown      | NA | NA       | NA       | SJC_S007772 | NA   | NA    | NA | Sjp_0112360.1 | NA                    | NA       |
| unknown      | NA | NA       | NA       | SJC_S007772 | NA   | NA    | NA | Sjp_0112370.1 | biological regulation | 0.76396  |
| unknown      | NA | NA       | NA       | SJC_S007773 | NA   | NA    | NA | Sjp_0112380.1 | NA                    | NA       |
| unknown      | NA | NA       | NA       | SJC_S007777 | NA   | NA    | NA | Sjp_0112390.1 | NA                    | NA       |
| unknown      | NA | NA       | NA       | SJC_S007777 | NA   | NA    | NA | Sjp_0112400.1 | NA                    | NA       |
| unknown      | NA | NA       | NA       | SJC_S007778 | NA   | NA    | NA | Sjp_0112410.1 | catalytic activity    | 0.035844 |
| unknown      | NA | NA       | NA       | SJC_S007782 | NA   | NA    | NA | Sjp_0112420.1 | NA                    | NA       |

|         |    |    |    |             |    |    |    |               |                       |          |
|---------|----|----|----|-------------|----|----|----|---------------|-----------------------|----------|
| unknown | NA | NA | NA | SJC_S007783 | NA | NA | NA | Sjp_0112430.1 | cellular process      | 0.63852  |
| unknown | NA | NA | NA | SJC_S007784 | NA | NA | NA | Sjp_0112440.1 | catalytic activity    | 0.035844 |
| unknown | NA | NA | NA | SJC_S007793 | NA | NA | NA | Sjp_0112450.1 | binding               | 0.052762 |
| unknown | NA | NA | NA | SJC_S007795 | NA | NA | NA | Sjp_0112460.1 | NA                    | NA       |
| unknown | NA | NA | NA | SJC_S007798 | NA | NA | NA | Sjp_0112470.1 | catalytic activity    | 0.035844 |
| unknown | NA | NA | NA | SJC_S007801 | NA | NA | NA | Sjp_0112480.1 | NA                    | NA       |
| unknown | NA | NA | NA | SJC_S007802 | NA | NA | NA | Sjp_0112490.1 | response to stimulus  | NA       |
| unknown | NA | NA | NA | SJC_S007802 | NA | NA | NA | Sjp_0112500.1 | NA                    | NA       |
| unknown | NA | NA | NA | SJC_S007804 | NA | NA | NA | Sjp_0112510.1 | NA                    | NA       |
| unknown | NA | NA | NA | SJC_S007804 | NA | NA | NA | Sjp_0112520.1 | catalytic activity    | 0.035844 |
| unknown | NA | NA | NA | SJC_S007805 | NA | NA | NA | Sjp_0112530.1 | binding               | 0.052762 |
| unknown | NA | NA | NA | SJC_S007807 | NA | NA | NA | Sjp_0112540.1 | binding               | 0.052762 |
| unknown | NA | NA | NA | SJC_S007807 | NA | NA | NA | Sjp_0112550.1 | NA                    | NA       |
| unknown | NA | NA | NA | SJC_S007813 | NA | NA | NA | Sjp_0112580.1 | biological regulation | 0.76396  |
| unknown | NA | NA | NA | SJC_S007814 | NA | NA | NA | Sjp_0112590.1 | NA                    | NA       |
| unknown | NA | NA | NA | SJC_S007815 | NA | NA | NA | Sjp_0112600.1 | NA                    | NA       |
| unknown | NA | NA | NA | SJC_S007816 | NA | NA | NA | Sjp_0112610.1 | NA                    | NA       |
| unknown | NA | NA | NA | SJC_S007816 | NA | NA | NA | Sjp_0112620.1 | NA                    | NA       |
| unknown | NA | NA | NA | SJC_S007818 | NA | NA | NA | Sjp_0112630.1 | NA                    | NA       |
| unknown | NA | NA | NA | SJC_S007818 | NA | NA | NA | Sjp_0112640.1 | NA                    | NA       |
| unknown | NA | NA | NA | SJC_S007822 | NA | NA | NA | Sjp_0112650.1 | NA                    | NA       |
| unknown | NA | NA | NA | SJC_S007823 | NA | NA | NA | Sjp_0112660.1 | binding               | 0.052762 |
| unknown | NA | NA | NA | SJC_S007836 | NA | NA | NA | Sjp_0112670.1 | NA                    | NA       |
| unknown | NA | NA | NA | SJC_S007840 | NA | NA | NA | Sjp_0112680.1 | NA                    | NA       |
| unknown | NA | NA | NA | SJC_S007841 | NA | NA | NA | Sjp_0112690.1 | NA                    | NA       |
| unknown | NA | NA | NA | SJC_S007843 | NA | NA | NA | Sjp_0112700.1 | catalytic activity    | 0.035844 |
| unknown | NA | NA | NA | SJC_S007843 | NA | NA | NA | Sjp_0112710.1 | NA                    | NA       |
| unknown | NA | NA | NA | SJC_S007844 | NA | NA | NA | Sjp_0112720.1 | metabolic process     | 0.41934  |
| unknown | NA | NA | NA | SJC_S007845 | NA | NA | NA | Sjp_0112730.1 | cell part             | 0.009037 |
| unknown | NA | NA | NA | SJC_S007846 | NA | NA | NA | Sjp_0112740.1 | NA                    | NA       |
| unknown | NA | NA | NA | SJC_S007847 | NA | NA | NA | Sjp_0112750.1 | NA                    | NA       |

|              |    |          |          |             |      |       |    |               |                               |          |
|--------------|----|----------|----------|-------------|------|-------|----|---------------|-------------------------------|----------|
| unknown      | NA | NA       | NA       | SJC_S007848 | NA   | NA    | NA | Sjp_0112760.1 | NA                            | NA       |
| unknown      | NA | NA       | NA       | SJC_S007851 | NA   | NA    | NA | Sjp_0112770.1 | NA                            | NA       |
| unknown      | NA | NA       | NA       | SJC_S007853 | NA   | NA    | NA | Sjp_0112780.1 | establishment of localization | NA       |
| unknown      | NA | NA       | NA       | SJC_S007853 | NA   | NA    | NA | Sjp_0112790.1 | NA                            | NA       |
| unknown      | NA | NA       | NA       | SJC_S007854 | NA   | NA    | NA | Sjp_0112800.1 | NA                            | NA       |
| unknown      | NA | NA       | NA       | SJC_S007855 | NA   | NA    | NA | Sjp_0112810.1 | NA                            | NA       |
| unknown      | NA | NA       | NA       | SJC_S007856 | NA   | NA    | NA | Sjp_0112820.1 | NA                            | NA       |
| unknown      | NA | NA       | NA       | SJC_S007857 | NA   | NA    | NA | Sjp_0112830.1 | NA                            | NA       |
| unknown      | NA | NA       | NA       | SJC_S007859 | NA   | NA    | NA | Sjp_0112840.1 | binding                       | 0.052762 |
| HSB10kb_1385 | WZ | 18466646 | 18478221 | SJC_S007860 | 2140 | 12373 | -  | Sjp_0112850.1 | biological regulation         | 0.76396  |
| HSB10kb_1385 | WZ | 18466646 | 18478221 | SJC_S007860 | 2140 | 12373 | -  | Sjp_0112860.1 | molecular transducer activity | 0.50162  |
| unknown      | NA | NA       | NA       | SJC_S007862 | NA   | NA    | NA | Sjp_0112870.1 | NA                            | NA       |
| unknown      | NA | NA       | NA       | SJC_S007864 | NA   | NA    | NA | Sjp_0112880.1 | NA                            | NA       |
| unknown      | NA | NA       | NA       | SJC_S007865 | NA   | NA    | NA | Sjp_0112890.1 | NA                            | NA       |
| HSB10kb_1386 | 1  | 17347593 | 17388994 | SJC_S007868 | 4740 | 18419 | -  | Sjp_0112900.1 | NA                            | NA       |
| HSB10kb_1386 | 1  | 17347593 | 17388994 | SJC_S007868 | 4740 | 18419 | -  | Sjp_0112910.1 | establishment of localization | NA       |
| HSB10kb_1387 | WZ | 42990279 | 43008257 | SJC_S007869 | 5877 | 22307 | -  | Sjp_0112920.1 | NA                            | NA       |
| HSB10kb_1387 | WZ | 42990279 | 43008257 | SJC_S007869 | 5877 | 22307 | -  | Sjp_0112930.1 | NA                            | NA       |
| unknown      | NA | NA       | NA       | SJC_S007870 | NA   | NA    | NA | Sjp_0112940.1 | NA                            | NA       |
| unknown      | NA | NA       | NA       | SJC_S007871 | NA   | NA    | NA | Sjp_0112950.1 | NA                            | NA       |
| unknown      | NA | NA       | NA       | SJC_S007873 | NA   | NA    | NA | Sjp_0112960.1 | NA                            | NA       |
| unknown      | NA | NA       | NA       | SJC_S007873 | NA   | NA    | NA | Sjp_0112970.1 | NA                            | NA       |
| unknown      | NA | NA       | NA       | SJC_S007874 | NA   | NA    | NA | Sjp_0112980.1 | NA                            | NA       |
| unknown      | NA | NA       | NA       | SJC_S007878 | NA   | NA    | NA | Sjp_0112990.1 | NA                            | NA       |
| unknown      | NA | NA       | NA       | SJC_S007879 | NA   | NA    | NA | Sjp_0113000.1 | NA                            | NA       |
| unknown      | NA | NA       | NA       | SJC_S007881 | NA   | NA    | NA | Sjp_0113010.1 | NA                            | NA       |
| unknown      | NA | NA       | NA       | SJC_S007882 | NA   | NA    | NA | Sjp_0113020.1 | biological regulation         | 0.76396  |
| unknown      | NA | NA       | NA       | SJC_S007885 | NA   | NA    | NA | Sjp_0113030.1 | NA                            | NA       |

|         |    |    |    |             |    |    |    |               |                               |          |
|---------|----|----|----|-------------|----|----|----|---------------|-------------------------------|----------|
| unknown | NA | NA | NA | SJC_S007890 | NA | NA | NA | Sjp_0113040.1 | NA                            | NA       |
| unknown | NA | NA | NA | SJC_S007893 | NA | NA | NA | Sjp_0113060.1 | NA                            | NA       |
| unknown | NA | NA | NA | SJC_S007893 | NA | NA | NA | Sjp_0113070.1 | cell part                     | 0.009037 |
| unknown | NA | NA | NA | SJC_S007896 | NA | NA | NA | Sjp_0113080.1 | NA                            | NA       |
| unknown | NA | NA | NA | SJC_S007902 | NA | NA | NA | Sjp_0113090.1 | biological regulation         | 0.76396  |
| unknown | NA | NA | NA | SJC_S007909 | NA | NA | NA | Sjp_0113100.1 | NA                            | NA       |
| unknown | NA | NA | NA | SJC_S007911 | NA | NA | NA | Sjp_0113110.1 | NA                            | NA       |
| unknown | NA | NA | NA | SJC_S007913 | NA | NA | NA | Sjp_0113120.1 | NA                            | NA       |
| unknown | NA | NA | NA | SJC_S007914 | NA | NA | NA | Sjp_0113130.1 | cell part                     | 0.009037 |
| unknown | NA | NA | NA | SJC_S007918 | NA | NA | NA | Sjp_0113140.1 | NA                            | NA       |
| unknown | NA | NA | NA | SJC_S007919 | NA | NA | NA | Sjp_0113150.1 | binding                       | 0.052762 |
| unknown | NA | NA | NA | SJC_S007920 | NA | NA | NA | Sjp_0113160.1 | biological regulation         | 0.76396  |
| unknown | NA | NA | NA | SJC_S007921 | NA | NA | NA | Sjp_0113170.1 | NA                            | NA       |
| unknown | NA | NA | NA | SJC_S007924 | NA | NA | NA | Sjp_0113180.1 | catalytic activity            | 0.035844 |
| unknown | NA | NA | NA | SJC_S007928 | NA | NA | NA | Sjp_0113190.1 | NA                            | NA       |
| unknown | NA | NA | NA | SJC_S007928 | NA | NA | NA | Sjp_0113200.1 | response to stimulus          | NA       |
| unknown | NA | NA | NA | SJC_S007933 | NA | NA | NA | Sjp_0113210.1 | NA                            | NA       |
| unknown | NA | NA | NA | SJC_S007937 | NA | NA | NA | Sjp_0113220.1 | NA                            | NA       |
| unknown | NA | NA | NA | SJC_S007938 | NA | NA | NA | Sjp_0113230.1 | NA                            | NA       |
| unknown | NA | NA | NA | SJC_S007946 | NA | NA | NA | Sjp_0113240.1 | catalytic activity            | 0.035844 |
| unknown | NA | NA | NA | SJC_S007947 | NA | NA | NA | Sjp_0113250.1 | NA                            | NA       |
| unknown | NA | NA | NA | SJC_S007948 | NA | NA | NA | Sjp_0113260.1 | molecular transducer activity | 0.50162  |
| unknown | NA | NA | NA | SJC_S007949 | NA | NA | NA | Sjp_0113270.1 | NA                            | NA       |
| unknown | NA | NA | NA | SJC_S007949 | NA | NA | NA | Sjp_0113280.1 | NA                            | NA       |
| unknown | NA | NA | NA | SJC_S007950 | NA | NA | NA | Sjp_0113290.1 | catalytic activity            | 0.035844 |
| unknown | NA | NA | NA | SJC_S007950 | NA | NA | NA | Sjp_0113300.1 | binding                       | 0.052762 |
| unknown | NA | NA | NA | SJC_S007951 | NA | NA | NA | Sjp_0113310.1 | binding                       | 0.052762 |
| unknown | NA | NA | NA | SJC_S007952 | NA | NA | NA | Sjp_0113320.1 | NA                            | NA       |
| unknown | NA | NA | NA | SJC_S007954 | NA | NA | NA | Sjp_0113330.1 | catalytic activity            | 0.035844 |



|         |    |    |    |             |    |    |    |               |                       |          |
|---------|----|----|----|-------------|----|----|----|---------------|-----------------------|----------|
| unknown | NA | NA | NA | SJC_S007954 | NA | NA | NA | Sjp_0113340.1 | binding               | 0.052762 |
| unknown | NA | NA | NA | SJC_S007956 | NA | NA | NA | Sjp_0113350.1 | NA                    | NA       |
| unknown | NA | NA | NA | SJC_S007957 | NA | NA | NA | Sjp_0113360.1 | NA                    | NA       |
| unknown | NA | NA | NA | SJC_S007958 | NA | NA | NA | Sjp_0113370.1 | NA                    | NA       |
| unknown | NA | NA | NA | SJC_S007959 | NA | NA | NA | Sjp_0113380.1 | NA                    | NA       |
| unknown | NA | NA | NA | SJC_S007960 | NA | NA | NA | Sjp_0113390.1 | NA                    | NA       |
| unknown | NA | NA | NA | SJC_S007961 | NA | NA | NA | Sjp_0113400.1 | cell part             | 0.009037 |
| unknown | NA | NA | NA | SJC_S007962 | NA | NA | NA | Sjp_0113410.1 | cell part             | 0.009037 |
| unknown | NA | NA | NA | SJC_S007963 | NA | NA | NA | Sjp_0113420.1 | catalytic activity    | 0.035844 |
| unknown | NA | NA | NA | SJC_S007965 | NA | NA | NA | Sjp_0113430.1 | NA                    | NA       |
| unknown | NA | NA | NA | SJC_S007968 | NA | NA | NA | Sjp_0113440.1 | NA                    | NA       |
| unknown | NA | NA | NA | SJC_S007973 | NA | NA | NA | Sjp_0113450.1 | NA                    | NA       |
| unknown | NA | NA | NA | SJC_S007974 | NA | NA | NA | Sjp_0113460.1 | NA                    | NA       |
| unknown | NA | NA | NA | SJC_S007975 | NA | NA | NA | Sjp_0113470.1 | cell part             | 0.009037 |
| unknown | NA | NA | NA | SJC_S007979 | NA | NA | NA | Sjp_0113480.1 | NA                    | NA       |
| unknown | NA | NA | NA | SJC_S007981 | NA | NA | NA | Sjp_0113490.1 | catalytic activity    | 0.035844 |
| unknown | NA | NA | NA | SJC_S007981 | NA | NA | NA | Sjp_0113500.1 | catalytic activity    | 0.035844 |
| unknown | NA | NA | NA | SJC_S007983 | NA | NA | NA | Sjp_0113510.1 | biological regulation | 0.76396  |
| unknown | NA | NA | NA | SJC_S007984 | NA | NA | NA | Sjp_0113520.1 | NA                    | NA       |
| unknown | NA | NA | NA | SJC_S007985 | NA | NA | NA | Sjp_0113530.1 | NA                    | NA       |
| unknown | NA | NA | NA | SJC_S007987 | NA | NA | NA | Sjp_0113550.1 | NA                    | NA       |
| unknown | NA | NA | NA | SJC_S007990 | NA | NA | NA | Sjp_0113560.1 | NA                    | NA       |
| unknown | NA | NA | NA | SJC_S007993 | NA | NA | NA | Sjp_0113570.1 | NA                    | NA       |
| unknown | NA | NA | NA | SJC_S007994 | NA | NA | NA | Sjp_0113580.1 | NA                    | NA       |
| unknown | NA | NA | NA | SJC_S007998 | NA | NA | NA | Sjp_0113590.1 | binding               | 0.052762 |
| unknown | NA | NA | NA | SJC_S008000 | NA | NA | NA | Sjp_0113600.1 | NA                    | NA       |
| unknown | NA | NA | NA | SJC_S008001 | NA | NA | NA | Sjp_0113610.1 | catalytic activity    | 0.035844 |
| unknown | NA | NA | NA | SJC_S008004 | NA | NA | NA | Sjp_0113620.1 | NA                    | NA       |
| unknown | NA | NA | NA | SJC_S008006 | NA | NA | NA | Sjp_0113630.1 | NA                    | NA       |
| unknown | NA | NA | NA | SJC_S008007 | NA | NA | NA | Sjp_0113640.1 | NA                    | NA       |
| unknown | NA | NA | NA | SJC_S008008 | NA | NA | NA | Sjp_0113650.1 | NA                    | NA       |
| unknown | NA | NA | NA | SJC_S008012 | NA | NA | NA | Sjp_0113660.1 | NA                    | NA       |
| unknown | NA | NA | NA | SJC_S008022 | NA | NA | NA | Sjp_0113670.1 | cell part             | 0.009037 |

|         |    |    |    |             |    |    |    |               |                       |          |
|---------|----|----|----|-------------|----|----|----|---------------|-----------------------|----------|
| unknown | NA | NA | NA | SJC_S008026 | NA | NA | NA | Sjp_0113680.1 | cell part             | 0.009037 |
| unknown | NA | NA | NA | SJC_S008028 | NA | NA | NA | Sjp_0113690.1 | cell part             | 0.009037 |
| unknown | NA | NA | NA | SJC_S008035 | NA | NA | NA | Sjp_0113700.1 | NA                    | NA       |
| unknown | NA | NA | NA | SJC_S008037 | NA | NA | NA | Sjp_0113710.1 | NA                    | NA       |
| unknown | NA | NA | NA | SJC_S008039 | NA | NA | NA | Sjp_0113720.1 | NA                    | NA       |
| unknown | NA | NA | NA | SJC_S008042 | NA | NA | NA | Sjp_0113730.1 | catalytic activity    | 0.035844 |
| unknown | NA | NA | NA | SJC_S008057 | NA | NA | NA | Sjp_0113740.1 | cell part             | 0.009037 |
| unknown | NA | NA | NA | SJC_S008058 | NA | NA | NA | Sjp_0113750.1 | cell part             | 0.009037 |
| unknown | NA | NA | NA | SJC_S008063 | NA | NA | NA | Sjp_0113760.1 | NA                    | NA       |
| unknown | NA | NA | NA | SJC_S008069 | NA | NA | NA | Sjp_0113770.1 | NA                    | NA       |
| unknown | NA | NA | NA | SJC_S008073 | NA | NA | NA | Sjp_0113780.1 | biological regulation | 0.76396  |
| unknown | NA | NA | NA | SJC_S008078 | NA | NA | NA | Sjp_0113790.1 | NA                    | NA       |
| unknown | NA | NA | NA | SJC_S008088 | NA | NA | NA | Sjp_0113800.1 | NA                    | NA       |
| unknown | NA | NA | NA | SJC_S008091 | NA | NA | NA | Sjp_0113810.1 | NA                    | NA       |
| unknown | NA | NA | NA | SJC_S008091 | NA | NA | NA | Sjp_0113820.1 | NA                    | NA       |
| unknown | NA | NA | NA | SJC_S008095 | NA | NA | NA | Sjp_0113840.1 | NA                    | NA       |
| unknown | NA | NA | NA | SJC_S008096 | NA | NA | NA | Sjp_0113850.1 | metabolic process     | 0.41934  |
| unknown | NA | NA | NA | SJC_S008096 | NA | NA | NA | Sjp_0113860.1 | NA                    | NA       |
| unknown | NA | NA | NA | SJC_S008097 | NA | NA | NA | Sjp_0113870.1 | binding               | 0.052762 |
| unknown | NA | NA | NA | SJC_S008099 | NA | NA | NA | Sjp_0113880.1 | NA                    | NA       |
| unknown | NA | NA | NA | SJC_S008102 | NA | NA | NA | Sjp_0113890.1 | NA                    | NA       |
| unknown | NA | NA | NA | SJC_S008106 | NA | NA | NA | Sjp_0113900.1 | cell part             | 0.009037 |
| unknown | NA | NA | NA | SJC_S008108 | NA | NA | NA | Sjp_0113910.1 | binding               | 0.052762 |
| unknown | NA | NA | NA | SJC_S008108 | NA | NA | NA | Sjp_0113920.1 | NA                    | NA       |
| unknown | NA | NA | NA | SJC_S008113 | NA | NA | NA | Sjp_0113930.1 | NA                    | NA       |
| unknown | NA | NA | NA | SJC_S008114 | NA | NA | NA | Sjp_0113940.1 | catalytic activity    | 0.035844 |
| unknown | NA | NA | NA | SJC_S008116 | NA | NA | NA | Sjp_0113950.1 | NA                    | NA       |
| unknown | NA | NA | NA | SJC_S008117 | NA | NA | NA | Sjp_0113960.1 | NA                    | NA       |
| unknown | NA | NA | NA | SJC_S008118 | NA | NA | NA | Sjp_0113970.1 | NA                    | NA       |
| unknown | NA | NA | NA | SJC_S008119 | NA | NA | NA | Sjp_0113980.1 | cellular process      | 0.63852  |
| unknown | NA | NA | NA | SJC_S008123 | NA | NA | NA | Sjp_0113990.1 | NA                    | NA       |
| unknown | NA | NA | NA | SJC_S008124 | NA | NA | NA | Sjp_0114000.1 | NA                    | NA       |

|              |    |          |          |             |    |       |    |               |                                               |          |
|--------------|----|----------|----------|-------------|----|-------|----|---------------|-----------------------------------------------|----------|
| unknown      | NA | NA       | NA       | SJC_S008126 | NA | NA    | NA | Sjp_0114010.1 | NA                                            | NA       |
| unknown      | NA | NA       | NA       | SJC_S008127 | NA | NA    | NA | Sjp_0114020.1 | NA                                            | NA       |
| unknown      | NA | NA       | NA       | SJC_S008127 | NA | NA    | NA | Sjp_0114030.1 | NA                                            | NA       |
| unknown      | NA | NA       | NA       | SJC_S008130 | NA | NA    | NA | Sjp_0114040.1 | binding                                       | 0.052762 |
| unknown      | NA | NA       | NA       | SJC_S008131 | NA | NA    | NA | Sjp_0114050.1 | NA                                            | NA       |
| unknown      | NA | NA       | NA       | SJC_S008132 | NA | NA    | NA | Sjp_0114060.1 | enzyme regulator activity                     | 0.1755   |
| unknown      | NA | NA       | NA       | SJC_S008133 | NA | NA    | NA | Sjp_0114070.1 | metabolic process                             | 0.41934  |
| unknown      | NA | NA       | NA       | SJC_S008134 | NA | NA    | NA | Sjp_0114080.1 | catalytic activity                            | 0.035844 |
| unknown      | NA | NA       | NA       | SJC_S008135 | NA | NA    | NA | Sjp_0114090.1 | NA                                            | NA       |
| unknown      | NA | NA       | NA       | SJC_S008138 | NA | NA    | NA | Sjp_0114100.1 | multi-organism process                        | NA       |
| unknown      | NA | NA       | NA       | SJC_S008139 | NA | NA    | NA | Sjp_0114110.1 | binding                                       | 0.052762 |
| unknown      | NA | NA       | NA       | SJC_S008139 | NA | NA    | NA | Sjp_0114120.1 | NA                                            | NA       |
| HSB10kb_1388 | WZ | 16523265 | 16540111 | SJC_S008140 | 45 | 20052 | +  | Sjp_0114130.1 | NA                                            | NA       |
| unknown      | NA | NA       | NA       | SJC_S008141 | NA | NA    | NA | Sjp_0114140.1 | protein binding transcription factor activity | NA       |
| unknown      | NA | NA       | NA       | SJC_S008143 | NA | NA    | NA | Sjp_0114150.1 | biological regulation                         | 0.76396  |
| unknown      | NA | NA       | NA       | SJC_S008144 | NA | NA    | NA | Sjp_0114160.1 | biological regulation                         | 0.76396  |
| unknown      | NA | NA       | NA       | SJC_S008153 | NA | NA    | NA | Sjp_0114170.1 | NA                                            | NA       |
| unknown      | NA | NA       | NA       | SJC_S008154 | NA | NA    | NA | Sjp_0114180.1 | NA                                            | NA       |
| unknown      | NA | NA       | NA       | SJC_S008159 | NA | NA    | NA | Sjp_0114190.1 | immune system process                         | NA       |
| unknown      | NA | NA       | NA       | SJC_S008161 | NA | NA    | NA | Sjp_0114200.1 | NA                                            | NA       |
| unknown      | NA | NA       | NA       | SJC_S008162 | NA | NA    | NA | Sjp_0114210.1 | NA                                            | NA       |
| unknown      | NA | NA       | NA       | SJC_S008169 | NA | NA    | NA | Sjp_0114220.1 | catalytic activity                            | 0.035844 |
| unknown      | NA | NA       | NA       | SJC_S008170 | NA | NA    | NA | Sjp_0114230.1 | NA                                            | NA       |
| unknown      | NA | NA       | NA       | SJC_S008171 | NA | NA    | NA | Sjp_0114240.1 | NA                                            | NA       |
| unknown      | NA | NA       | NA       | SJC_S008178 | NA | NA    | NA | Sjp_0114250.1 | NA                                            | NA       |

|         |    |    |    |             |    |    |    |               |                               |         |
|---------|----|----|----|-------------|----|----|----|---------------|-------------------------------|---------|
| unknown | NA | NA | NA | SJC_S008179 | NA | NA | NA | Sjp_0114260.1 | NA                            | NA      |
| unknown | NA | NA | NA | SJC_S008182 | NA | NA | NA | Sjp_0114270.1 | NA                            | NA      |
| unknown | NA | NA | NA | SJC_S008185 | NA | NA | NA | Sjp_0114280.1 | NA                            | NA      |
| unknown | NA | NA | NA | SJC_S008191 | NA | NA | NA | Sjp_0114290.1 | NA                            | NA      |
| unknown | NA | NA | NA | SJC_S008196 | NA | NA | NA | Sjp_0114300.1 | NA                            | NA      |
| unknown | NA | NA | NA | SJC_S008206 | NA | NA | NA | Sjp_0114310.1 | NA                            | NA      |
| unknown | NA | NA | NA | SJC_S008210 | NA | NA | NA | Sjp_0114320.1 | NA                            | NA      |
| unknown | NA | NA | NA | SJC_S008213 | NA | NA | NA | Sjp_0114330.1 | NA                            | NA      |
| unknown | NA | NA | NA | SJC_S008214 | NA | NA | NA | Sjp_0114340.1 | NA                            | NA      |
| unknown | NA | NA | NA | SJC_S008216 | NA | NA | NA | Sjp_0114350.1 | NA                            | NA      |
| unknown | NA | NA | NA | SJC_S008228 | NA | NA | NA | Sjp_0114360.1 | NA                            | NA      |
| unknown | NA | NA | NA | SJC_S008240 | NA | NA | NA | Sjp_0114370.1 | NA                            | NA      |
| unknown | NA | NA | NA | SJC_S008244 | NA | NA | NA | Sjp_0114380.1 | NA                            | NA      |
| unknown | NA | NA | NA | SJC_S008252 | NA | NA | NA | Sjp_0114390.1 | NA                            | NA      |
| unknown | NA | NA | NA | SJC_S008253 | NA | NA | NA | Sjp_0114400.1 | NA                            | NA      |
| unknown | NA | NA | NA | SJC_S008258 | NA | NA | NA | Sjp_0114410.1 | NA                            | NA      |
| unknown | NA | NA | NA | SJC_S008270 | NA | NA | NA | Sjp_0114420.1 | NA                            | NA      |
| unknown | NA | NA | NA | SJC_S008277 | NA | NA | NA | Sjp_0114430.1 | NA                            | NA      |
| unknown | NA | NA | NA | SJC_S008279 | NA | NA | NA | Sjp_0114440.1 | NA                            | NA      |
| unknown | NA | NA | NA | SJC_S008281 | NA | NA | NA | Sjp_0114450.1 | NA                            | NA      |
| unknown | NA | NA | NA | SJC_S008299 | NA | NA | NA | Sjp_0114460.1 | NA                            | NA      |
| unknown | NA | NA | NA | SJC_S008307 | NA | NA | NA | Sjp_0114470.1 | NA                            | NA      |
| unknown | NA | NA | NA | SJC_S008309 | NA | NA | NA | Sjp_0114480.1 | NA                            | NA      |
| unknown | NA | NA | NA | SJC_S008314 | NA | NA | NA | Sjp_0114490.1 | NA                            | NA      |
| unknown | NA | NA | NA | SJC_S008319 | NA | NA | NA | Sjp_0114500.1 | NA                            | NA      |
| unknown | NA | NA | NA | SJC_S008327 | NA | NA | NA | Sjp_0114510.1 | NA                            | NA      |
| unknown | NA | NA | NA | SJC_S008337 | NA | NA | NA | Sjp_0114530.1 | NA                            | NA      |
| unknown | NA | NA | NA | SJC_S008337 | NA | NA | NA | Sjp_0114540.1 | NA                            | NA      |
| unknown | NA | NA | NA | SJC_S008338 | NA | NA | NA | Sjp_0114550.1 | response to stimulus          | NA      |
| unknown | NA | NA | NA | SJC_S008343 | NA | NA | NA | Sjp_0114560.1 | NA                            | NA      |
| unknown | NA | NA | NA | SJC_S008346 | NA | NA | NA | Sjp_0114570.1 | molecular transducer activity | 0.50162 |

|         |    |    |    |             |    |    |    |               |                       |          |
|---------|----|----|----|-------------|----|----|----|---------------|-----------------------|----------|
| unknown | NA | NA | NA | SJC_S008348 | NA | NA | NA | Sjp_0114580.1 | NA                    | NA       |
| unknown | NA | NA | NA | SJC_S008351 | NA | NA | NA | Sjp_0114590.1 | NA                    | NA       |
| unknown | NA | NA | NA | SJC_S008357 | NA | NA | NA | Sjp_0114600.1 | NA                    | NA       |
| unknown | NA | NA | NA | SJC_S008358 | NA | NA | NA | Sjp_0114610.1 | metabolic process     | 0.41934  |
| unknown | NA | NA | NA | SJC_S008360 | NA | NA | NA | Sjp_0114620.1 | NA                    | NA       |
| unknown | NA | NA | NA | SJC_S008361 | NA | NA | NA | Sjp_0114630.1 | NA                    | NA       |
| unknown | NA | NA | NA | SJC_S008371 | NA | NA | NA | Sjp_0114650.1 | NA                    | NA       |
| unknown | NA | NA | NA | SJC_S008374 | NA | NA | NA | Sjp_0114660.1 | NA                    | NA       |
| unknown | NA | NA | NA | SJC_S008378 | NA | NA | NA | Sjp_0114670.1 | NA                    | NA       |
| unknown | NA | NA | NA | SJC_S008381 | NA | NA | NA | Sjp_0114680.1 | NA                    | NA       |
| unknown | NA | NA | NA | SJC_S008388 | NA | NA | NA | Sjp_0114690.1 | NA                    | NA       |
| unknown | NA | NA | NA | SJC_S008390 | NA | NA | NA | Sjp_0114700.1 | NA                    | NA       |
| unknown | NA | NA | NA | SJC_S008394 | NA | NA | NA | Sjp_0114710.1 | NA                    | NA       |
| unknown | NA | NA | NA | SJC_S008394 | NA | NA | NA | Sjp_0114720.1 | NA                    | NA       |
| unknown | NA | NA | NA | SJC_S008396 | NA | NA | NA | Sjp_0114730.1 | NA                    | NA       |
| unknown | NA | NA | NA | SJC_S008398 | NA | NA | NA | Sjp_0114740.1 | biological regulation | 0.76396  |
| unknown | NA | NA | NA | SJC_S008401 | NA | NA | NA | Sjp_0114750.1 | NA                    | NA       |
| unknown | NA | NA | NA | SJC_S008401 | NA | NA | NA | Sjp_0114760.1 | catalytic activity    | 0.035844 |
| unknown | NA | NA | NA | SJC_S008408 | NA | NA | NA | Sjp_0114770.1 | NA                    | NA       |
| unknown | NA | NA | NA | SJC_S008414 | NA | NA | NA | Sjp_0114780.1 | NA                    | NA       |
| unknown | NA | NA | NA | SJC_S008417 | NA | NA | NA | Sjp_0114790.1 | cellular process      | 0.63852  |
| unknown | NA | NA | NA | SJC_S008418 | NA | NA | NA | Sjp_0114800.1 | NA                    | NA       |
| unknown | NA | NA | NA | SJC_S008420 | NA | NA | NA | Sjp_0114810.1 | binding               | 0.052762 |
| unknown | NA | NA | NA | SJC_S008423 | NA | NA | NA | Sjp_0114820.1 | metabolic process     | 0.41934  |
| unknown | NA | NA | NA | SJC_S008425 | NA | NA | NA | Sjp_0114830.1 | NA                    | NA       |
| unknown | NA | NA | NA | SJC_S008426 | NA | NA | NA | Sjp_0114840.1 | NA                    | NA       |
| unknown | NA | NA | NA | SJC_S008427 | NA | NA | NA | Sjp_0114850.1 | NA                    | NA       |
| unknown | NA | NA | NA | SJC_S008428 | NA | NA | NA | Sjp_0114860.1 | NA                    | NA       |
| unknown | NA | NA | NA | SJC_S008430 | NA | NA | NA | Sjp_0114870.1 | NA                    | NA       |
| unknown | NA | NA | NA | SJC_S008432 | NA | NA | NA | Sjp_0114880.1 | NA                    | NA       |
| unknown | NA | NA | NA | SJC_S008437 | NA | NA | NA | Sjp_0114890.1 | NA                    | NA       |

|              |         |          |          |             |       |       |    |               |                               |          |
|--------------|---------|----------|----------|-------------|-------|-------|----|---------------|-------------------------------|----------|
| unknown      | NA      | NA       | NA       | SJC_S008438 | NA    | NA    | NA | Sjp_0114900.1 | NA                            | NA       |
| HSB10kb_1389 | WZ      | 35434704 | 35468071 | SJC_S008439 | 21330 | 60869 | -  | Sjp_0114910.1 | cellular process              | 0.63852  |
| HSB10kb_1389 | WZ      | 35434704 | 35468071 | SJC_S008439 | 21330 | 60869 | -  | Sjp_0114920.1 | cell part                     | 0.009037 |
| HSB10kb_1389 | WZ      | 35434704 | 35468071 | SJC_S008439 | 21330 | 60869 | -  | Sjp_0114930.1 | NA                            | NA       |
| HSB10kb_1390 | WZ      | 58826621 | 58840108 | SJC_S008440 | 6481  | 17735 | +  | Sjp_0114940.1 | NA                            | NA       |
| EBR10kb_477  | "WZ,WZ" | NA       | NA       | SJC_S008440 | 17736 | 22861 | NA | Sjp_0114940.1 | NA                            | NA       |
| EBR10kb_477  | "WZ,WZ" | NA       | NA       | SJC_S008440 | 17736 | 22861 | NA | Sjp_0114950.1 | NA                            | NA       |
| HSB10kb_1391 | WZ      | 58803244 | 58824168 | SJC_S008440 | 22862 | 40198 | -  | Sjp_0114950.1 | NA                            | NA       |
| HSB10kb_1392 | WZ      | 7370024  | 7404520  | SJC_S008441 | 40716 | 70121 | +  | Sjp_0114960.1 | NA                            | NA       |
| HSB10kb_1392 | WZ      | 7370024  | 7404520  | SJC_S008441 | 40716 | 70121 | +  | Sjp_0114970.1 | NA                            | NA       |
| unknown      | NA      | NA       | NA       | SJC_S008443 | NA    | NA    | NA | Sjp_0114980.1 | NA                            | NA       |
| unknown      | NA      | NA       | NA       | SJC_S008444 | NA    | NA    | NA | Sjp_0114990.1 | cell part                     | 0.009037 |
| unknown      | NA      | NA       | NA       | SJC_S008444 | NA    | NA    | NA | Sjp_0115000.1 | NA                            | NA       |
| unknown      | NA      | NA       | NA       | SJC_S008445 | NA    | NA    | NA | Sjp_0115010.1 | NA                            | NA       |
| unknown      | NA      | NA       | NA       | SJC_S008447 | NA    | NA    | NA | Sjp_0115020.1 | establishment of localization | NA       |
| unknown      | NA      | NA       | NA       | SJC_S008448 | NA    | NA    | NA | Sjp_0115030.1 | NA                            | NA       |
| unknown      | NA      | NA       | NA       | SJC_S008448 | NA    | NA    | NA | Sjp_0115040.1 | NA                            | NA       |
| unknown      | NA      | NA       | NA       | SJC_S008449 | NA    | NA    | NA | Sjp_0115050.1 | catalytic activity            | 0.035844 |
| unknown      | NA      | NA       | NA       | SJC_S008449 | NA    | NA    | NA | Sjp_0115060.1 | catalytic activity            | 0.035844 |
| unknown      | NA      | NA       | NA       | SJC_S008451 | NA    | NA    | NA | Sjp_0115070.1 | NA                            | NA       |
| unknown      | NA      | NA       | NA       | SJC_S008451 | NA    | NA    | NA | Sjp_0115080.1 | catalytic activity            | 0.035844 |
| unknown      | NA      | NA       | NA       | SJC_S008451 | NA    | NA    | NA | Sjp_0115090.1 | NA                            | NA       |
| unknown      | NA      | NA       | NA       | SJC_S008452 | NA    | NA    | NA | Sjp_0115100.1 | NA                            | NA       |
| unknown      | NA      | NA       | NA       | SJC_S008453 | NA    | NA    | NA | Sjp_0115110.1 | NA                            | NA       |
| unknown      | NA      | NA       | NA       | SJC_S008454 | NA    | NA    | NA | Sjp_0115120.1 | NA                            | NA       |
| HSB10kb_1393 | WZ      | 6054112  | 6110470  | SJC_S008455 | 26    | 81048 | +  | Sjp_0115130.1 | NA                            | NA       |
| HSB10kb_1393 | WZ      | 6054112  | 6110470  | SJC_S008455 | 26    | 81048 | +  | Sjp_0115140.1 | catalytic activity            | 0.035844 |
| HSB10kb_1394 | 4       | 28037115 | 28052857 | SJC_S008456 | 1959  | 22671 | -  | Sjp_0115150.1 | NA                            | NA       |
| unknown      | NA      | NA       | NA       | SJC_S008459 | NA    | NA    | NA | Sjp_0115160.1 | binding                       | 0.052762 |
| unknown      | NA      | NA       | NA       | SJC_S008459 | NA    | NA    | NA | Sjp_0115170.1 | NA                            | NA       |
| unknown      | NA      | NA       | NA       | SJC_S008460 | NA    | NA    | NA | Sjp_0115180.1 | NA                            | NA       |
| unknown      | NA      | NA       | NA       | SJC_S008462 | NA    | NA    | NA | Sjp_0115190.1 | NA                            | NA       |
| unknown      | NA      | NA       | NA       | SJC_S008462 | NA    | NA    | NA | Sjp_0115200.1 | response to                   | NA       |

|              |    |         |         |             |       |       |    |               |                       |          |
|--------------|----|---------|---------|-------------|-------|-------|----|---------------|-----------------------|----------|
|              |    |         |         |             |       |       |    |               | stimulus              |          |
| unknown      | NA | NA      | NA      | SJC_S008465 | NA    | NA    | NA | Sjp_0115210.1 | NA                    | NA       |
| unknown      | NA | NA      | NA      | SJC_S008468 | NA    | NA    | NA | Sjp_0115220.1 | NA                    | NA       |
| unknown      | NA | NA      | NA      | SJC_S008469 | NA    | NA    | NA | Sjp_0115230.1 | biological regulation | 0.76396  |
| unknown      | NA | NA      | NA      | SJC_S008470 | NA    | NA    | NA | Sjp_0115240.1 | NA                    | NA       |
| unknown      | NA | NA      | NA      | SJC_S008472 | NA    | NA    | NA | Sjp_0115250.1 | developmental process | NA       |
| unknown      | NA | NA      | NA      | SJC_S008474 | NA    | NA    | NA | Sjp_0115260.1 | NA                    | NA       |
| unknown      | NA | NA      | NA      | SJC_S008477 | NA    | NA    | NA | Sjp_0115270.1 | NA                    | NA       |
| unknown      | NA | NA      | NA      | SJC_S008484 | NA    | NA    | NA | Sjp_0115290.1 | catalytic activity    | 0.035844 |
| unknown      | NA | NA      | NA      | SJC_S008500 | NA    | NA    | NA | Sjp_0115320.1 | NA                    | NA       |
| unknown      | NA | NA      | NA      | SJC_S008500 | NA    | NA    | NA | Sjp_0115330.1 | NA                    | NA       |
| unknown      | NA | NA      | NA      | SJC_S008501 | NA    | NA    | NA | Sjp_0115340.1 | NA                    | NA       |
| unknown      | NA | NA      | NA      | SJC_S008502 | NA    | NA    | NA | Sjp_0115350.1 | NA                    | NA       |
| unknown      | NA | NA      | NA      | SJC_S008505 | NA    | NA    | NA | Sjp_0115360.1 | NA                    | NA       |
| unknown      | NA | NA      | NA      | SJC_S008506 | NA    | NA    | NA | Sjp_0115370.1 | NA                    | NA       |
| unknown      | NA | NA      | NA      | SJC_S008507 | NA    | NA    | NA | Sjp_0115380.1 | NA                    | NA       |
| unknown      | NA | NA      | NA      | SJC_S008510 | NA    | NA    | NA | Sjp_0115390.1 | catalytic activity    | 0.035844 |
| unknown      | NA | NA      | NA      | SJC_S008511 | NA    | NA    | NA | Sjp_0115400.1 | NA                    | NA       |
| unknown      | NA | NA      | NA      | SJC_S008516 | NA    | NA    | NA | Sjp_0115410.1 | NA                    | NA       |
| unknown      | NA | NA      | NA      | SJC_S008516 | NA    | NA    | NA | Sjp_0115420.1 | NA                    | NA       |
| unknown      | NA | NA      | NA      | SJC_S008518 | NA    | NA    | NA | Sjp_0115430.1 | NA                    | NA       |
| unknown      | NA | NA      | NA      | SJC_S008519 | NA    | NA    | NA | Sjp_0115440.1 | biological regulation | 0.76396  |
| unknown      | NA | NA      | NA      | SJC_S008520 | NA    | NA    | NA | Sjp_0115450.1 | NA                    | NA       |
| unknown      | NA | NA      | NA      | SJC_S008529 | NA    | NA    | NA | Sjp_0115460.1 | NA                    | NA       |
| unknown      | NA | NA      | NA      | SJC_S008530 | NA    | NA    | NA | Sjp_0115470.1 | NA                    | NA       |
| unknown      | NA | NA      | NA      | SJC_S008531 | NA    | NA    | NA | Sjp_0115480.1 | NA                    | NA       |
| unknown      | NA | NA      | NA      | SJC_S008532 | NA    | NA    | NA | Sjp_0115490.1 | cell part             | 0.009037 |
| unknown      | NA | NA      | NA      | SJC_S008537 | NA    | NA    | NA | Sjp_0115500.1 | NA                    | NA       |
| HSB10kb_1395 | 4  | 5912666 | 5941513 | SJC_S008538 | 11471 | 37897 | +  | Sjp_0115510.1 | cell part             | 0.009037 |
| HSB10kb_1395 | 4  | 5912666 | 5941513 | SJC_S008538 | 11471 | 37897 | +  | Sjp_0115520.1 | NA                    | NA       |
| HSB10kb_1395 | 4  | 5912666 | 5941513 | SJC_S008538 | 11471 | 37897 | +  | Sjp_0115530.1 | NA                    | NA       |

|              |    |          |          |             |       |       |    |               |                                               |          |
|--------------|----|----------|----------|-------------|-------|-------|----|---------------|-----------------------------------------------|----------|
| HSB10kb_1396 | WZ | 42428397 | 42462224 | SJC_S008539 | 2231  | 29256 | +  | Sjp_0115540.1 | NA                                            | NA       |
| unknown      | NA | NA       | NA       | SJC_S008540 | NA    | NA    | NA | Sjp_0115550.1 | NA                                            | NA       |
| unknown      | NA | NA       | NA       | SJC_S008542 | NA    | NA    | NA | Sjp_0115560.1 | NA                                            | NA       |
| unknown      | NA | NA       | NA       | SJC_S008543 | NA    | NA    | NA | Sjp_0115570.1 | cellular component organization or biogenesis | NA       |
| unknown      | NA | NA       | NA       | SJC_S008544 | NA    | NA    | NA | Sjp_0115580.1 | NA                                            | NA       |
| unknown      | NA | NA       | NA       | SJC_S008544 | NA    | NA    | NA | Sjp_0115590.1 | biological regulation                         | 0.76396  |
| unknown      | NA | NA       | NA       | SJC_S008546 | NA    | NA    | NA | Sjp_0115600.1 | NA                                            | NA       |
| unknown      | NA | NA       | NA       | SJC_S008546 | NA    | NA    | NA | Sjp_0115610.1 | NA                                            | NA       |
| unknown      | NA | NA       | NA       | SJC_S008547 | NA    | NA    | NA | Sjp_0115620.1 | NA                                            | NA       |
| unknown      | NA | NA       | NA       | SJC_S008548 | NA    | NA    | NA | Sjp_0115630.1 | NA                                            | NA       |
| unknown      | NA | NA       | NA       | SJC_S008549 | NA    | NA    | NA | Sjp_0115640.1 | NA                                            | NA       |
| unknown      | NA | NA       | NA       | SJC_S008551 | NA    | NA    | NA | Sjp_0115650.1 | NA                                            | NA       |
| unknown      | NA | NA       | NA       | SJC_S008553 | NA    | NA    | NA | Sjp_0115660.1 | NA                                            | NA       |
| unknown      | NA | NA       | NA       | SJC_S008556 | NA    | NA    | NA | Sjp_0115670.1 | NA                                            | NA       |
| unknown      | NA | NA       | NA       | SJC_S008558 | NA    | NA    | NA | Sjp_0115680.1 | NA                                            | NA       |
| unknown      | NA | NA       | NA       | SJC_S008559 | NA    | NA    | NA | Sjp_0115690.1 | NA                                            | NA       |
| unknown      | NA | NA       | NA       | SJC_S008559 | NA    | NA    | NA | Sjp_0115700.1 | binding                                       | 0.052762 |
| HSB10kb_1397 | 4  | 15655391 | 15693512 | SJC_S008559 | 20772 | 60118 | -  | Sjp_0115710.1 | catalytic activity                            | 0.035844 |
| HSB10kb_1397 | 4  | 15655391 | 15693512 | SJC_S008559 | 20772 | 60118 | -  | Sjp_0115720.1 | NA                                            | NA       |
| HSB10kb_1397 | 4  | 15655391 | 15693512 | SJC_S008559 | 20772 | 60118 | -  | Sjp_0115730.1 | NA                                            | NA       |
| unknown      | NA | NA       | NA       | SJC_S008561 | NA    | NA    | NA | Sjp_0115740.1 | NA                                            | NA       |
| unknown      | NA | NA       | NA       | SJC_S008562 | NA    | NA    | NA | Sjp_0115750.1 | NA                                            | NA       |
| unknown      | NA | NA       | NA       | SJC_S008563 | NA    | NA    | NA | Sjp_0115760.1 | NA                                            | NA       |
| unknown      | NA | NA       | NA       | SJC_S008566 | NA    | NA    | NA | Sjp_0115770.1 | NA                                            | NA       |
| unknown      | NA | NA       | NA       | SJC_S008566 | NA    | NA    | NA | Sjp_0115780.1 | biological regulation                         | 0.76396  |
| unknown      | NA | NA       | NA       | SJC_S008570 | NA    | NA    | NA | Sjp_0115790.1 | NA                                            | NA       |
| unknown      | NA | NA       | NA       | SJC_S008571 | NA    | NA    | NA | Sjp_0115800.1 | NA                                            | NA       |
| HSB10kb_1398 | WZ | 57887050 | 57900204 | SJC_S008573 | 4353  | 20554 | +  | Sjp_0115810.1 | NA                                            | NA       |
| unknown      | NA | NA       | NA       | SJC_S008582 | NA    | NA    | NA | Sjp_0115860.1 | NA                                            | NA       |



|         |    |    |    |             |    |    |    |               |                               |          |
|---------|----|----|----|-------------|----|----|----|---------------|-------------------------------|----------|
| unknown | NA | NA | NA | SJC_S008585 | NA | NA | NA | Sjp_0115870.1 | NA                            | NA       |
| unknown | NA | NA | NA | SJC_S008587 | NA | NA | NA | Sjp_0115880.1 | NA                            | NA       |
| unknown | NA | NA | NA | SJC_S008600 | NA | NA | NA | Sjp_0115890.1 | NA                            | NA       |
| unknown | NA | NA | NA | SJC_S008602 | NA | NA | NA | Sjp_0115900.1 | NA                            | NA       |
| unknown | NA | NA | NA | SJC_S008608 | NA | NA | NA | Sjp_0115910.1 | binding                       | 0.052762 |
| unknown | NA | NA | NA | SJC_S008611 | NA | NA | NA | Sjp_0115920.1 | NA                            | NA       |
| unknown | NA | NA | NA | SJC_S008614 | NA | NA | NA | Sjp_0115930.1 | NA                            | NA       |
| unknown | NA | NA | NA | SJC_S008614 | NA | NA | NA | Sjp_0115940.1 | NA                            | NA       |
| unknown | NA | NA | NA | SJC_S008615 | NA | NA | NA | Sjp_0115950.1 | NA                            | NA       |
| unknown | NA | NA | NA | SJC_S008619 | NA | NA | NA | Sjp_0115960.1 | establishment of localization | NA       |
| unknown | NA | NA | NA | SJC_S008619 | NA | NA | NA | Sjp_0115970.1 | NA                            | NA       |
| unknown | NA | NA | NA | SJC_S008620 | NA | NA | NA | Sjp_0115980.1 | catalytic activity            | 0.035844 |
| unknown | NA | NA | NA | SJC_S008621 | NA | NA | NA | Sjp_0115990.1 | NA                            | NA       |
| unknown | NA | NA | NA | SJC_S008629 | NA | NA | NA | Sjp_0116000.1 | NA                            | NA       |
| unknown | NA | NA | NA | SJC_S008639 | NA | NA | NA | Sjp_0116010.1 | NA                            | NA       |
| unknown | NA | NA | NA | SJC_S008645 | NA | NA | NA | Sjp_0116020.1 | NA                            | NA       |
| unknown | NA | NA | NA | SJC_S008646 | NA | NA | NA | Sjp_0116030.1 | NA                            | NA       |
| unknown | NA | NA | NA | SJC_S008650 | NA | NA | NA | Sjp_0116040.1 | NA                            | NA       |
| unknown | NA | NA | NA | SJC_S008655 | NA | NA | NA | Sjp_0116050.1 | NA                            | NA       |
| unknown | NA | NA | NA | SJC_S008657 | NA | NA | NA | Sjp_0116060.1 | NA                            | NA       |
| unknown | NA | NA | NA | SJC_S008659 | NA | NA | NA | Sjp_0116070.1 | NA                            | NA       |
| unknown | NA | NA | NA | SJC_S008660 | NA | NA | NA | Sjp_0116080.1 | NA                            | NA       |
| unknown | NA | NA | NA | SJC_S008662 | NA | NA | NA | Sjp_0116090.1 | cell part                     | 0.009037 |
| unknown | NA | NA | NA | SJC_S008673 | NA | NA | NA | Sjp_0116100.1 | binding                       | 0.052762 |
| unknown | NA | NA | NA | SJC_S008676 | NA | NA | NA | Sjp_0116110.1 | cell part                     | 0.009037 |
| unknown | NA | NA | NA | SJC_S008685 | NA | NA | NA | Sjp_0116120.1 | NA                            | NA       |
| unknown | NA | NA | NA | SJC_S008691 | NA | NA | NA | Sjp_0116130.1 | NA                            | NA       |
| unknown | NA | NA | NA | SJC_S008703 | NA | NA | NA | Sjp_0116140.1 | NA                            | NA       |
| unknown | NA | NA | NA | SJC_S008707 | NA | NA | NA | Sjp_0116150.1 | binding                       | 0.052762 |
| unknown | NA | NA | NA | SJC_S008708 | NA | NA | NA | Sjp_0116160.1 | NA                            | NA       |
| unknown | NA | NA | NA | SJC_S008709 | NA | NA | NA | Sjp_0116170.1 | NA                            | NA       |
| unknown | NA | NA | NA | SJC_S008711 | NA | NA | NA | Sjp_0116180.1 | NA                            | NA       |
| unknown | NA | NA | NA | SJC_S008712 | NA | NA | NA | Sjp_0116190.1 | NA                            | NA       |

|         |    |    |    |             |    |    |    |               |                                               |          |
|---------|----|----|----|-------------|----|----|----|---------------|-----------------------------------------------|----------|
| unknown | NA | NA | NA | SJC_S008714 | NA | NA | NA | Sjp_0116200.1 | transporter activity                          | 0.782    |
| unknown | NA | NA | NA | SJC_S008717 | NA | NA | NA | Sjp_0116210.1 | biological regulation                         | 0.76396  |
| unknown | NA | NA | NA | SJC_S008718 | NA | NA | NA | Sjp_0116220.1 | NA                                            | NA       |
| unknown | NA | NA | NA | SJC_S008719 | NA | NA | NA | Sjp_0116230.1 | binding                                       | 0.052762 |
| unknown | NA | NA | NA | SJC_S008722 | NA | NA | NA | Sjp_0116240.1 | NA                                            | NA       |
| unknown | NA | NA | NA | SJC_S008723 | NA | NA | NA | Sjp_0116250.1 | cellular component organization or biogenesis | NA       |
| unknown | NA | NA | NA | SJC_S008725 | NA | NA | NA | Sjp_0116260.1 | catalytic activity                            | 0.035844 |
| unknown | NA | NA | NA | SJC_S008726 | NA | NA | NA | Sjp_0116270.1 | NA                                            | NA       |
| unknown | NA | NA | NA | SJC_S008728 | NA | NA | NA | Sjp_0116280.1 | binding                                       | 0.052762 |
| unknown | NA | NA | NA | SJC_S008729 | NA | NA | NA | Sjp_0116290.1 | biological regulation                         | 0.76396  |
| unknown | NA | NA | NA | SJC_S008730 | NA | NA | NA | Sjp_0116300.1 | NA                                            | NA       |
| unknown | NA | NA | NA | SJC_S008732 | NA | NA | NA | Sjp_0116310.1 | NA                                            | NA       |
| unknown | NA | NA | NA | SJC_S008732 | NA | NA | NA | Sjp_0116320.1 | NA                                            | NA       |
| unknown | NA | NA | NA | SJC_S008732 | NA | NA | NA | Sjp_0116330.1 | NA                                            | NA       |
| unknown | NA | NA | NA | SJC_S008733 | NA | NA | NA | Sjp_0116340.1 | NA                                            | NA       |
| unknown | NA | NA | NA | SJC_S008734 | NA | NA | NA | Sjp_0116350.1 | biological regulation                         | 0.76396  |
| unknown | NA | NA | NA | SJC_S008736 | NA | NA | NA | Sjp_0116360.1 | NA                                            | NA       |
| unknown | NA | NA | NA | SJC_S008739 | NA | NA | NA | Sjp_0116370.1 | NA                                            | NA       |
| unknown | NA | NA | NA | SJC_S008751 | NA | NA | NA | Sjp_0116380.1 | NA                                            | NA       |
| unknown | NA | NA | NA | SJC_S008752 | NA | NA | NA | Sjp_0116390.1 | NA                                            | NA       |
| unknown | NA | NA | NA | SJC_S008754 | NA | NA | NA | Sjp_0116400.1 | NA                                            | NA       |
| unknown | NA | NA | NA | SJC_S008756 | NA | NA | NA | Sjp_0116410.1 | transporter activity                          | 0.782    |
| unknown | NA | NA | NA | SJC_S008762 | NA | NA | NA | Sjp_0116420.1 | NA                                            | NA       |
| unknown | NA | NA | NA | SJC_S008774 | NA | NA | NA | Sjp_0116430.1 | transporter activity                          | 0.782    |
| unknown | NA | NA | NA | SJC_S008780 | NA | NA | NA | Sjp_0116440.1 | NA                                            | NA       |

|         |    |    |    |             |    |    |    |               |                               |          |
|---------|----|----|----|-------------|----|----|----|---------------|-------------------------------|----------|
| unknown | NA | NA | NA | SJC_S008781 | NA | NA | NA | Sjp_0116450.1 | binding                       | 0.052762 |
| unknown | NA | NA | NA | SJC_S008795 | NA | NA | NA | Sjp_0116460.1 | binding                       | 0.052762 |
| unknown | NA | NA | NA | SJC_S008801 | NA | NA | NA | Sjp_0116470.1 | NA                            | NA       |
| unknown | NA | NA | NA | SJC_S008802 | NA | NA | NA | Sjp_0116480.1 | NA                            | NA       |
| unknown | NA | NA | NA | SJC_S008804 | NA | NA | NA | Sjp_0116490.1 | biological regulation         | 0.76396  |
| unknown | NA | NA | NA | SJC_S008807 | NA | NA | NA | Sjp_0116500.1 | NA                            | NA       |
| unknown | NA | NA | NA | SJC_S008819 | NA | NA | NA | Sjp_0116520.1 | NA                            | NA       |
| unknown | NA | NA | NA | SJC_S008820 | NA | NA | NA | Sjp_0116530.1 | molecular transducer activity | 0.50162  |
| unknown | NA | NA | NA | SJC_S008835 | NA | NA | NA | Sjp_0116540.1 | NA                            | NA       |
| unknown | NA | NA | NA | SJC_S008842 | NA | NA | NA | Sjp_0116550.1 | NA                            | NA       |
| unknown | NA | NA | NA | SJC_S008850 | NA | NA | NA | Sjp_0116570.1 | NA                            | NA       |
| unknown | NA | NA | NA | SJC_S008857 | NA | NA | NA | Sjp_0116580.1 | NA                            | NA       |
| unknown | NA | NA | NA | SJC_S008869 | NA | NA | NA | Sjp_0116590.1 | NA                            | NA       |
| unknown | NA | NA | NA | SJC_S008870 | NA | NA | NA | Sjp_0116600.1 | NA                            | NA       |
| unknown | NA | NA | NA | SJC_S008875 | NA | NA | NA | Sjp_0116610.1 | NA                            | NA       |
| unknown | NA | NA | NA | SJC_S008876 | NA | NA | NA | Sjp_0116620.1 | NA                            | NA       |
| unknown | NA | NA | NA | SJC_S008877 | NA | NA | NA | Sjp_0116630.1 | NA                            | NA       |
| unknown | NA | NA | NA | SJC_S008878 | NA | NA | NA | Sjp_0116640.1 | molecular transducer activity | 0.50162  |
| unknown | NA | NA | NA | SJC_S008894 | NA | NA | NA | Sjp_0116660.1 | NA                            | NA       |
| unknown | NA | NA | NA | SJC_S008900 | NA | NA | NA | Sjp_0116670.1 | binding                       | 0.052762 |
| unknown | NA | NA | NA | SJC_S008929 | NA | NA | NA | Sjp_0116690.1 | NA                            | NA       |
| unknown | NA | NA | NA | SJC_S008945 | NA | NA | NA | Sjp_0116710.1 | catalytic activity            | 0.035844 |
| unknown | NA | NA | NA | SJC_S008952 | NA | NA | NA | Sjp_0116720.1 | binding                       | 0.052762 |
| unknown | NA | NA | NA | SJC_S008953 | NA | NA | NA | Sjp_0116730.1 | NA                            | NA       |
| unknown | NA | NA | NA | SJC_S008959 | NA | NA | NA | Sjp_0116740.1 | NA                            | NA       |
| unknown | NA | NA | NA | SJC_S008964 | NA | NA | NA | Sjp_0116750.1 | NA                            | NA       |
| unknown | NA | NA | NA | SJC_S008964 | NA | NA | NA | Sjp_0116760.1 | NA                            | NA       |
| unknown | NA | NA | NA | SJC_S008982 | NA | NA | NA | Sjp_0116780.1 | NA                            | NA       |
| unknown | NA | NA | NA | SJC_S008986 | NA | NA | NA | Sjp_0116790.1 | developmental                 | NA       |

|              |    |          |          |             |      |       |    |               |                           |          |
|--------------|----|----------|----------|-------------|------|-------|----|---------------|---------------------------|----------|
|              |    |          |          |             |      |       |    |               | process                   |          |
| unknown      | NA | NA       | NA       | SJC_S008987 | NA   | NA    | NA | Sjp_0116800.1 | NA                        | NA       |
| unknown      | NA | NA       | NA       | SJC_S008991 | NA   | NA    | NA | Sjp_0116820.1 | NA                        | NA       |
| unknown      | NA | NA       | NA       | SJC_S008991 | NA   | NA    | NA | Sjp_0116830.1 | NA                        | NA       |
| unknown      | NA | NA       | NA       | SJC_S008992 | NA   | NA    | NA | Sjp_0116840.1 | NA                        | NA       |
| unknown      | NA | NA       | NA       | SJC_S008994 | NA   | NA    | NA | Sjp_0116850.1 | NA                        | NA       |
| unknown      | NA | NA       | NA       | SJC_S008995 | NA   | NA    | NA | Sjp_0116860.1 | enzyme regulator activity | 0.1755   |
| unknown      | NA | NA       | NA       | SJC_S008999 | NA   | NA    | NA | Sjp_0116870.1 | NA                        | NA       |
| unknown      | NA | NA       | NA       | SJC_S009006 | NA   | NA    | NA | Sjp_0116880.1 | NA                        | NA       |
| unknown      | NA | NA       | NA       | SJC_S009007 | NA   | NA    | NA | Sjp_0116890.1 | NA                        | NA       |
| unknown      | NA | NA       | NA       | SJC_S009011 | NA   | NA    | NA | Sjp_0116900.1 | NA                        | NA       |
| unknown      | NA | NA       | NA       | SJC_S009013 | NA   | NA    | NA | Sjp_0116910.1 | NA                        | NA       |
| unknown      | NA | NA       | NA       | SJC_S009019 | NA   | NA    | NA | Sjp_0116940.1 | NA                        | NA       |
| unknown      | NA | NA       | NA       | SJC_S009023 | NA   | NA    | NA | Sjp_0116960.1 | NA                        | NA       |
| unknown      | NA | NA       | NA       | SJC_S009034 | NA   | NA    | NA | Sjp_0116970.1 | NA                        | NA       |
| unknown      | NA | NA       | NA       | SJC_S009035 | NA   | NA    | NA | Sjp_0116980.1 | catalytic activity        | 0.035844 |
| HSB10kb_1399 | WZ | 30092537 | 30111973 | SJC_S009036 | 3945 | 15272 | +  | Sjp_0116990.1 | NA                        | NA       |
| unknown      | NA | NA       | NA       | SJC_S009039 | NA   | NA    | NA | Sjp_0117000.1 | NA                        | NA       |
| unknown      | NA | NA       | NA       | SJC_S009040 | NA   | NA    | NA | Sjp_0117020.1 | binding                   | 0.052762 |
| unknown      | NA | NA       | NA       | SJC_S009041 | NA   | NA    | NA | Sjp_0117030.1 | response to stimulus      | NA       |
| unknown      | NA | NA       | NA       | SJC_S009042 | NA   | NA    | NA | Sjp_0117040.1 | NA                        | NA       |
| unknown      | NA | NA       | NA       | SJC_S009044 | NA   | NA    | NA | Sjp_0117050.1 | NA                        | NA       |
| unknown      | NA | NA       | NA       | SJC_S009046 | NA   | NA    | NA | Sjp_0117060.1 | NA                        | NA       |
| unknown      | NA | NA       | NA       | SJC_S009047 | NA   | NA    | NA | Sjp_0117070.1 | NA                        | NA       |
| unknown      | NA | NA       | NA       | SJC_S009054 | NA   | NA    | NA | Sjp_0117080.1 | NA                        | NA       |
| unknown      | NA | NA       | NA       | SJC_S009066 | NA   | NA    | NA | Sjp_0117090.1 | biological regulation     | 0.76396  |
| unknown      | NA | NA       | NA       | SJC_S009066 | NA   | NA    | NA | Sjp_0117100.1 | NA                        | NA       |
| unknown      | NA | NA       | NA       | SJC_S009068 | NA   | NA    | NA | Sjp_0117110.1 | NA                        | NA       |
| unknown      | NA | NA       | NA       | SJC_S009079 | NA   | NA    | NA | Sjp_0117120.1 | NA                        | NA       |
| unknown      | NA | NA       | NA       | SJC_S009088 | NA   | NA    | NA | Sjp_0117130.1 | NA                        | NA       |

|         |    |    |    |             |    |    |    |               |                    |          |
|---------|----|----|----|-------------|----|----|----|---------------|--------------------|----------|
| unknown | NA | NA | NA | SJC_S009093 | NA | NA | NA | Sjp_0117150.1 | NA                 | NA       |
| unknown | NA | NA | NA | SJC_S009096 | NA | NA | NA | Sjp_0117160.1 | NA                 | NA       |
| unknown | NA | NA | NA | SJC_S009119 | NA | NA | NA | Sjp_0117170.1 | catalytic activity | 0.035844 |
| unknown | NA | NA | NA | SJC_S009134 | NA | NA | NA | Sjp_0117180.1 | NA                 | NA       |
| unknown | NA | NA | NA | SJC_S009143 | NA | NA | NA | Sjp_0117190.1 | binding            | 0.052762 |
| unknown | NA | NA | NA | SJC_S009162 | NA | NA | NA | Sjp_0117220.1 | NA                 | NA       |
| unknown | NA | NA | NA | SJC_S009184 | NA | NA | NA | Sjp_0117230.1 | NA                 | NA       |
| unknown | NA | NA | NA | SJC_S009184 | NA | NA | NA | Sjp_0117240.1 | NA                 | NA       |
| unknown | NA | NA | NA | SJC_S009195 | NA | NA | NA | Sjp_0117250.1 | NA                 | NA       |
| unknown | NA | NA | NA | SJC_S009196 | NA | NA | NA | Sjp_0117260.1 | NA                 | NA       |
| unknown | NA | NA | NA | SJC_S009203 | NA | NA | NA | Sjp_0117270.1 | cell part          | 0.009037 |
| unknown | NA | NA | NA | SJC_S009208 | NA | NA | NA | Sjp_0117280.1 | NA                 | NA       |
| unknown | NA | NA | NA | SJC_S009218 | NA | NA | NA | Sjp_0117290.1 | cell part          | 0.009037 |
| unknown | NA | NA | NA | SJC_S009224 | NA | NA | NA | Sjp_0117300.1 | NA                 | NA       |
| unknown | NA | NA | NA | SJC_S009225 | NA | NA | NA | Sjp_0117310.1 | NA                 | NA       |
| unknown | NA | NA | NA | SJC_S009245 | NA | NA | NA | Sjp_0117320.1 | NA                 | NA       |
| unknown | NA | NA | NA | SJC_S009250 | NA | NA | NA | Sjp_0117330.1 | catalytic activity | 0.035844 |
| unknown | NA | NA | NA | SJC_S009260 | NA | NA | NA | Sjp_0117340.1 | NA                 | NA       |
| unknown | NA | NA | NA | SJC_S009266 | NA | NA | NA | Sjp_0117350.1 | NA                 | NA       |
| unknown | NA | NA | NA | SJC_S009287 | NA | NA | NA | Sjp_0117360.1 | NA                 | NA       |
| unknown | NA | NA | NA | SJC_S009294 | NA | NA | NA | Sjp_0117370.1 | NA                 | NA       |
| unknown | NA | NA | NA | SJC_S009316 | NA | NA | NA | Sjp_0117390.1 | NA                 | NA       |
| unknown | NA | NA | NA | SJC_S009324 | NA | NA | NA | Sjp_0117400.1 | NA                 | NA       |
| unknown | NA | NA | NA | SJC_S009347 | NA | NA | NA | Sjp_0117410.1 | catalytic activity | 0.035844 |
| unknown | NA | NA | NA | SJC_S009373 | NA | NA | NA | Sjp_0117420.1 | NA                 | NA       |
| unknown | NA | NA | NA | SJC_S009376 | NA | NA | NA | Sjp_0117430.1 | catalytic activity | 0.035844 |
| unknown | NA | NA | NA | SJC_S009379 | NA | NA | NA | Sjp_0117440.1 | NA                 | NA       |
| unknown | NA | NA | NA | SJC_S009380 | NA | NA | NA | Sjp_0117450.1 | NA                 | NA       |
| unknown | NA | NA | NA | SJC_S009398 | NA | NA | NA | Sjp_0117460.1 | NA                 | NA       |
| unknown | NA | NA | NA | SJC_S009399 | NA | NA | NA | Sjp_0117470.1 | cell part          | 0.009037 |
| unknown | NA | NA | NA | SJC_S009403 | NA | NA | NA | Sjp_0117480.1 | NA                 | NA       |
| unknown | NA | NA | NA | SJC_S009405 | NA | NA | NA | Sjp_0117490.1 | NA                 | NA       |
| unknown | NA | NA | NA | SJC_S009413 | NA | NA | NA | Sjp_0117500.1 | NA                 | NA       |
| unknown | NA | NA | NA | SJC_S009430 | NA | NA | NA | Sjp_0117510.1 | NA                 | NA       |

|         |    |    |    |             |    |    |    |               |                    |          |
|---------|----|----|----|-------------|----|----|----|---------------|--------------------|----------|
| unknown | NA | NA | NA | SJC_S009441 | NA | NA | NA | Sjp_0117520.1 | NA                 | NA       |
| unknown | NA | NA | NA | SJC_S009443 | NA | NA | NA | Sjp_0117530.1 | NA                 | NA       |
| unknown | NA | NA | NA | SJC_S009456 | NA | NA | NA | Sjp_0117540.1 | NA                 | NA       |
| unknown | NA | NA | NA | SJC_S009460 | NA | NA | NA | Sjp_0117550.1 | NA                 | NA       |
| unknown | NA | NA | NA | SJC_S009477 | NA | NA | NA | Sjp_0117560.1 | NA                 | NA       |
| unknown | NA | NA | NA | SJC_S009481 | NA | NA | NA | Sjp_0117570.1 | NA                 | NA       |
| unknown | NA | NA | NA | SJC_S009531 | NA | NA | NA | Sjp_0117580.1 | NA                 | NA       |
| unknown | NA | NA | NA | SJC_S009532 | NA | NA | NA | Sjp_0117590.1 | catalytic activity | 0.035844 |
| unknown | NA | NA | NA | SJC_S009540 | NA | NA | NA | Sjp_0117600.1 | NA                 | NA       |
| unknown | NA | NA | NA | SJC_S009567 | NA | NA | NA | Sjp_0117610.1 | NA                 | NA       |
| unknown | NA | NA | NA | SJC_S009573 | NA | NA | NA | Sjp_0117620.1 | NA                 | NA       |
| unknown | NA | NA | NA | SJC_S009580 | NA | NA | NA | Sjp_0117630.1 | NA                 | NA       |
| unknown | NA | NA | NA | SJC_S009613 | NA | NA | NA | Sjp_0117640.1 | NA                 | NA       |
| unknown | NA | NA | NA | SJC_S009650 | NA | NA | NA | Sjp_0117650.1 | NA                 | NA       |
| unknown | NA | NA | NA | SJC_S009674 | NA | NA | NA | Sjp_0117660.1 | NA                 | NA       |
| unknown | NA | NA | NA | SJC_S009710 | NA | NA | NA | Sjp_0117680.1 | NA                 | NA       |
| unknown | NA | NA | NA | SJC_S009723 | NA | NA | NA | Sjp_0117690.1 | NA                 | NA       |
| unknown | NA | NA | NA | SJC_S009731 | NA | NA | NA | Sjp_0117700.1 | NA                 | NA       |
| unknown | NA | NA | NA | SJC_S009732 | NA | NA | NA | Sjp_0117710.1 | NA                 | NA       |
| unknown | NA | NA | NA | SJC_S009744 | NA | NA | NA | Sjp_0117720.1 | binding            | 0.052762 |
| unknown | NA | NA | NA | SJC_S009761 | NA | NA | NA | Sjp_0117730.1 | NA                 | NA       |
| unknown | NA | NA | NA | SJC_S009764 | NA | NA | NA | Sjp_0117740.1 | NA                 | NA       |
| unknown | NA | NA | NA | SJC_S009800 | NA | NA | NA | Sjp_0117750.1 | NA                 | NA       |
| unknown | NA | NA | NA | SJC_S009812 | NA | NA | NA | Sjp_0117760.1 | NA                 | NA       |
| unknown | NA | NA | NA | SJC_S009828 | NA | NA | NA | Sjp_0117770.1 | NA                 | NA       |
| unknown | NA | NA | NA | SJC_S009832 | NA | NA | NA | Sjp_0117780.1 | NA                 | NA       |
| unknown | NA | NA | NA | SJC_S009840 | NA | NA | NA | Sjp_0117790.1 | metabolic process  | 0.41934  |
| unknown | NA | NA | NA | SJC_S009852 | NA | NA | NA | Sjp_0117800.1 | NA                 | NA       |
| unknown | NA | NA | NA | SJC_S009859 | NA | NA | NA | Sjp_0117810.1 | NA                 | NA       |
| unknown | NA | NA | NA | SJC_S009863 | NA | NA | NA | Sjp_0117820.1 | NA                 | NA       |
| unknown | NA | NA | NA | SJC_S009888 | NA | NA | NA | Sjp_0117850.1 | NA                 | NA       |
| unknown | NA | NA | NA | SJC_S009892 | NA | NA | NA | Sjp_0117860.1 | NA                 | NA       |
| unknown | NA | NA | NA | SJC_S009900 | NA | NA | NA | Sjp_0117870.1 | NA                 | NA       |

|         |    |    |    |             |    |    |    |               |                               |          |
|---------|----|----|----|-------------|----|----|----|---------------|-------------------------------|----------|
| unknown | NA | NA | NA | SJC_S009902 | NA | NA | NA | Sjp_0117880.1 | cell part                     | 0.009037 |
| unknown | NA | NA | NA | SJC_S009910 | NA | NA | NA | Sjp_0117890.1 | NA                            | NA       |
| unknown | NA | NA | NA | SJC_S009926 | NA | NA | NA | Sjp_0117900.1 | NA                            | NA       |
| unknown | NA | NA | NA | SJC_S009934 | NA | NA | NA | Sjp_0117910.1 | establishment of localization | NA       |
| unknown | NA | NA | NA | SJC_S009940 | NA | NA | NA | Sjp_0117920.1 | catalytic activity            | 0.035844 |
| unknown | NA | NA | NA | SJC_S009952 | NA | NA | NA | Sjp_0117930.1 | NA                            | NA       |
| unknown | NA | NA | NA | SJC_S009964 | NA | NA | NA | Sjp_0117940.1 | NA                            | NA       |
| unknown | NA | NA | NA | SJC_S009975 | NA | NA | NA | Sjp_0117970.1 | NA                            | NA       |
| unknown | NA | NA | NA | SJC_S009975 | NA | NA | NA | Sjp_0117980.1 | catalytic activity            | 0.035844 |
| unknown | NA | NA | NA | SJC_S009980 | NA | NA | NA | Sjp_0117990.1 | NA                            | NA       |
| unknown | NA | NA | NA | SJC_S009980 | NA | NA | NA | Sjp_0118000.1 | NA                            | NA       |
| unknown | NA | NA | NA | SJC_S009984 | NA | NA | NA | Sjp_0118010.1 | catalytic activity            | 0.035844 |
| unknown | NA | NA | NA | SJC_S009987 | NA | NA | NA | Sjp_0118020.1 | NA                            | NA       |
| unknown | NA | NA | NA | SJC_S009993 | NA | NA | NA | Sjp_0118030.1 | NA                            | NA       |
| unknown | NA | NA | NA | SJC_S010002 | NA | NA | NA | Sjp_0118040.1 | NA                            | NA       |
| unknown | NA | NA | NA | SJC_S010005 | NA | NA | NA | Sjp_0118050.1 | cell part                     | 0.009037 |
| unknown | NA | NA | NA | SJC_S010009 | NA | NA | NA | Sjp_0118060.1 | NA                            | NA       |
| unknown | NA | NA | NA | SJC_S010014 | NA | NA | NA | Sjp_0118080.1 | catalytic activity            | 0.035844 |
| unknown | NA | NA | NA | SJC_S010015 | NA | NA | NA | Sjp_0118090.1 | NA                            | NA       |
| unknown | NA | NA | NA | SJC_S010024 | NA | NA | NA | Sjp_0118100.1 | NA                            | NA       |
| unknown | NA | NA | NA | SJC_S010027 | NA | NA | NA | Sjp_0118110.1 | cell part                     | 0.009037 |
| unknown | NA | NA | NA | SJC_S010029 | NA | NA | NA | Sjp_0118120.1 | NA                            | NA       |
| unknown | NA | NA | NA | SJC_S010030 | NA | NA | NA | Sjp_0118130.1 | NA                            | NA       |
| unknown | NA | NA | NA | SJC_S010034 | NA | NA | NA | Sjp_0118140.1 | NA                            | NA       |
| unknown | NA | NA | NA | SJC_S010036 | NA | NA | NA | Sjp_0118150.1 | NA                            | NA       |
| unknown | NA | NA | NA | SJC_S010043 | NA | NA | NA | Sjp_0118160.1 | NA                            | NA       |
| unknown | NA | NA | NA | SJC_S010055 | NA | NA | NA | Sjp_0118170.1 | catalytic activity            | 0.035844 |
| unknown | NA | NA | NA | SJC_S010060 | NA | NA | NA | Sjp_0118180.1 | NA                            | NA       |
| unknown | NA | NA | NA | SJC_S010063 | NA | NA | NA | Sjp_0118190.1 | NA                            | NA       |
| unknown | NA | NA | NA | SJC_S010068 | NA | NA | NA | Sjp_0118200.1 | NA                            | NA       |
| unknown | NA | NA | NA | SJC_S010069 | NA | NA | NA | Sjp_0118210.1 | NA                            | NA       |
| unknown | NA | NA | NA | SJC_S010071 | NA | NA | NA | Sjp_0118220.1 | NA                            | NA       |
| unknown | NA | NA | NA | SJC_S010074 | NA | NA | NA | Sjp_0118230.1 | NA                            | NA       |

|              |    |         |         |             |      |       |    |               |                       |          |
|--------------|----|---------|---------|-------------|------|-------|----|---------------|-----------------------|----------|
| unknown      | NA | NA      | NA      | SJC_S010080 | NA   | NA    | NA | Sjp_0118240.1 | NA                    | NA       |
| unknown      | NA | NA      | NA      | SJC_S010081 | NA   | NA    | NA | Sjp_0118250.1 | NA                    | NA       |
| unknown      | NA | NA      | NA      | SJC_S010086 | NA   | NA    | NA | Sjp_0118260.1 | NA                    | NA       |
| unknown      | NA | NA      | NA      | SJC_S010088 | NA   | NA    | NA | Sjp_0118270.1 | NA                    | NA       |
| unknown      | NA | NA      | NA      | SJC_S010095 | NA   | NA    | NA | Sjp_0118280.1 | NA                    | NA       |
| unknown      | NA | NA      | NA      | SJC_S010096 | NA   | NA    | NA | Sjp_0118290.1 | NA                    | NA       |
| unknown      | NA | NA      | NA      | SJC_S010103 | NA   | NA    | NA | Sjp_0118310.1 | biological regulation | 0.76396  |
| unknown      | NA | NA      | NA      | SJC_S010104 | NA   | NA    | NA | Sjp_0118320.1 | NA                    | NA       |
| unknown      | NA | NA      | NA      | SJC_S010106 | NA   | NA    | NA | Sjp_0118330.1 | NA                    | NA       |
| unknown      | NA | NA      | NA      | SJC_S010112 | NA   | NA    | NA | Sjp_0118340.1 | NA                    | NA       |
| unknown      | NA | NA      | NA      | SJC_S010120 | NA   | NA    | NA | Sjp_0118350.1 | cellular process      | 0.63852  |
| unknown      | NA | NA      | NA      | SJC_S010126 | NA   | NA    | NA | Sjp_0118360.1 | NA                    | NA       |
| unknown      | NA | NA      | NA      | SJC_S010128 | NA   | NA    | NA | Sjp_0118370.1 | NA                    | NA       |
| HSB10kb_1400 | 4  | 5616015 | 5670072 | SJC_S010130 | 2425 | 35758 | -  | Sjp_0118380.1 | NA                    | NA       |
| unknown      | NA | NA      | NA      | SJC_S010134 | NA   | NA    | NA | Sjp_0118390.1 | NA                    | NA       |
| unknown      | NA | NA      | NA      | SJC_S010135 | NA   | NA    | NA | Sjp_0118400.1 | NA                    | NA       |
| unknown      | NA | NA      | NA      | SJC_S010136 | NA   | NA    | NA | Sjp_0118410.1 | catalytic activity    | 0.035844 |
| unknown      | NA | NA      | NA      | SJC_S010139 | NA   | NA    | NA | Sjp_0118420.1 | NA                    | NA       |
| unknown      | NA | NA      | NA      | SJC_S010144 | NA   | NA    | NA | Sjp_0118440.1 | NA                    | NA       |
| unknown      | NA | NA      | NA      | SJC_S010146 | NA   | NA    | NA | Sjp_0118450.1 | NA                    | NA       |
| unknown      | NA | NA      | NA      | SJC_S010148 | NA   | NA    | NA | Sjp_0118460.1 | NA                    | NA       |
| unknown      | NA | NA      | NA      | SJC_S010149 | NA   | NA    | NA | Sjp_0118470.1 | NA                    | NA       |
| unknown      | NA | NA      | NA      | SJC_S010170 | NA   | NA    | NA | Sjp_0118510.1 | NA                    | NA       |
| unknown      | NA | NA      | NA      | SJC_S010189 | NA   | NA    | NA | Sjp_0118520.1 | NA                    | NA       |
| unknown      | NA | NA      | NA      | SJC_S010190 | NA   | NA    | NA | Sjp_0118530.1 | NA                    | NA       |
| unknown      | NA | NA      | NA      | SJC_S010194 | NA   | NA    | NA | Sjp_0118540.1 | NA                    | NA       |
| unknown      | NA | NA      | NA      | SJC_S010206 | NA   | NA    | NA | Sjp_0118560.1 | NA                    | NA       |
| unknown      | NA | NA      | NA      | SJC_S010206 | NA   | NA    | NA | Sjp_0118570.1 | binding               | 0.052762 |
| unknown      | NA | NA      | NA      | SJC_S010235 | NA   | NA    | NA | Sjp_0118580.1 | NA                    | NA       |
| unknown      | NA | NA      | NA      | SJC_S010270 | NA   | NA    | NA | Sjp_0118590.1 | biological regulation | 0.76396  |
| unknown      | NA | NA      | NA      | SJC_S010275 | NA   | NA    | NA | Sjp_0118600.1 | NA                    | NA       |
| unknown      | NA | NA      | NA      | SJC_S010279 | NA   | NA    | NA | Sjp_0118610.1 | NA                    | NA       |



|         |    |    |    |             |    |    |    |               |                           |          |
|---------|----|----|----|-------------|----|----|----|---------------|---------------------------|----------|
| unknown | NA | NA | NA | SJC_S010284 | NA | NA | NA | Sjp_0118620.1 | NA                        | NA       |
| unknown | NA | NA | NA | SJC_S010285 | NA | NA | NA | Sjp_0118630.1 | NA                        | NA       |
| unknown | NA | NA | NA | SJC_S010296 | NA | NA | NA | Sjp_0118640.1 | NA                        | NA       |
| unknown | NA | NA | NA | SJC_S010317 | NA | NA | NA | Sjp_0118650.1 | transporter activity      | 0.782    |
| unknown | NA | NA | NA | SJC_S010331 | NA | NA | NA | Sjp_0118660.1 | NA                        | NA       |
| unknown | NA | NA | NA | SJC_S010340 | NA | NA | NA | Sjp_0118670.1 | NA                        | NA       |
| unknown | NA | NA | NA | SJC_S010359 | NA | NA | NA | Sjp_0118680.1 | NA                        | NA       |
| unknown | NA | NA | NA | SJC_S010384 | NA | NA | NA | Sjp_0118690.1 | NA                        | NA       |
| unknown | NA | NA | NA | SJC_S010387 | NA | NA | NA | Sjp_0118700.1 | NA                        | NA       |
| unknown | NA | NA | NA | SJC_S010398 | NA | NA | NA | Sjp_0118730.1 | response to stimulus      | NA       |
| unknown | NA | NA | NA | SJC_S010399 | NA | NA | NA | Sjp_0118740.1 | catalytic activity        | 0.035844 |
| unknown | NA | NA | NA | SJC_S010431 | NA | NA | NA | Sjp_0118750.1 | virion part               | NA       |
| unknown | NA | NA | NA | SJC_S010431 | NA | NA | NA | Sjp_0118760.1 | catalytic activity        | 0.035844 |
| unknown | NA | NA | NA | SJC_S010463 | NA | NA | NA | Sjp_0118770.1 | NA                        | NA       |
| unknown | NA | NA | NA | SJC_S010465 | NA | NA | NA | Sjp_0118780.1 | NA                        | NA       |
| unknown | NA | NA | NA | SJC_S010466 | NA | NA | NA | Sjp_0118790.1 | catalytic activity        | 0.035844 |
| unknown | NA | NA | NA | SJC_S010507 | NA | NA | NA | Sjp_0118800.1 | catalytic activity        | 0.035844 |
| unknown | NA | NA | NA | SJC_S010508 | NA | NA | NA | Sjp_0118810.1 | NA                        | NA       |
| unknown | NA | NA | NA | SJC_S010517 | NA | NA | NA | Sjp_0118820.1 | NA                        | NA       |
| unknown | NA | NA | NA | SJC_S010527 | NA | NA | NA | Sjp_0118830.1 | NA                        | NA       |
| unknown | NA | NA | NA | SJC_S010547 | NA | NA | NA | Sjp_0118840.1 | NA                        | NA       |
| unknown | NA | NA | NA | SJC_S010549 | NA | NA | NA | Sjp_0118850.1 | biological regulation     | 0.76396  |
| unknown | NA | NA | NA | SJC_S010554 | NA | NA | NA | Sjp_0118860.1 | electron carrier activity | NA       |
| unknown | NA | NA | NA | SJC_S010568 | NA | NA | NA | Sjp_0118870.1 | NA                        | NA       |
| unknown | NA | NA | NA | SJC_S010575 | NA | NA | NA | Sjp_0118880.1 | NA                        | NA       |
| unknown | NA | NA | NA | SJC_S010578 | NA | NA | NA | Sjp_0118890.1 | NA                        | NA       |
| unknown | NA | NA | NA | SJC_S010586 | NA | NA | NA | Sjp_0118900.1 | cellular process          | 0.63852  |
| unknown | NA | NA | NA | SJC_S010593 | NA | NA | NA | Sjp_0118910.1 | catalytic activity        | 0.035844 |
| unknown | NA | NA | NA | SJC_S010604 | NA | NA | NA | Sjp_0118920.1 | NA                        | NA       |
| unknown | NA | NA | NA | SJC_S010631 | NA | NA | NA | Sjp_0118930.1 | NA                        | NA       |

|         |    |    |    |             |    |    |    |               |                                               |          |
|---------|----|----|----|-------------|----|----|----|---------------|-----------------------------------------------|----------|
| unknown | NA | NA | NA | SJC_S010632 | NA | NA | NA | Sjp_0118940.1 | catalytic activity                            | 0.035844 |
| unknown | NA | NA | NA | SJC_S010642 | NA | NA | NA | Sjp_0118960.1 | NA                                            | NA       |
| unknown | NA | NA | NA | SJC_S010647 | NA | NA | NA | Sjp_0118970.1 | NA                                            | NA       |
| unknown | NA | NA | NA | SJC_S010667 | NA | NA | NA | Sjp_0118980.1 | NA                                            | NA       |
| unknown | NA | NA | NA | SJC_S010679 | NA | NA | NA | Sjp_0118990.1 | catalytic activity                            | 0.035844 |
| unknown | NA | NA | NA | SJC_S010710 | NA | NA | NA | Sjp_0119010.1 | NA                                            | NA       |
| unknown | NA | NA | NA | SJC_S010769 | NA | NA | NA | Sjp_0119020.1 | NA                                            | NA       |
| unknown | NA | NA | NA | SJC_S010770 | NA | NA | NA | Sjp_0119030.1 | NA                                            | NA       |
| unknown | NA | NA | NA | SJC_S010811 | NA | NA | NA | Sjp_0119040.1 | cellular process                              | 0.63852  |
| unknown | NA | NA | NA | SJC_S010855 | NA | NA | NA | Sjp_0119050.1 | NA                                            | NA       |
| unknown | NA | NA | NA | SJC_S010873 | NA | NA | NA | Sjp_0119060.1 | NA                                            | NA       |
| unknown | NA | NA | NA | SJC_S010898 | NA | NA | NA | Sjp_0119070.1 | cell part                                     | 0.009037 |
| unknown | NA | NA | NA | SJC_S010900 | NA | NA | NA | Sjp_0119080.1 | NA                                            | NA       |
| unknown | NA | NA | NA | SJC_S010910 | NA | NA | NA | Sjp_0119090.1 | NA                                            | NA       |
| unknown | NA | NA | NA | SJC_S010914 | NA | NA | NA | Sjp_0119100.1 | NA                                            | NA       |
| unknown | NA | NA | NA | SJC_S010915 | NA | NA | NA | Sjp_0119110.1 | NA                                            | NA       |
| unknown | NA | NA | NA | SJC_S010917 | NA | NA | NA | Sjp_0119120.1 | NA                                            | NA       |
| unknown | NA | NA | NA | SJC_S010923 | NA | NA | NA | Sjp_0119130.1 | NA                                            | NA       |
| unknown | NA | NA | NA | SJC_S010937 | NA | NA | NA | Sjp_0119140.1 | binding                                       | 0.052762 |
| unknown | NA | NA | NA | SJC_S011036 | NA | NA | NA | Sjp_0119170.1 | NA                                            | NA       |
| unknown | NA | NA | NA | SJC_S011049 | NA | NA | NA | Sjp_0119180.1 | cellular component organization or biogenesis | NA       |
| unknown | NA | NA | NA | SJC_S011050 | NA | NA | NA | Sjp_0119190.1 | NA                                            | NA       |
| unknown | NA | NA | NA | SJC_S011058 | NA | NA | NA | Sjp_0119200.1 | NA                                            | NA       |
| unknown | NA | NA | NA | SJC_S011074 | NA | NA | NA | Sjp_0119210.1 | NA                                            | NA       |
| unknown | NA | NA | NA | SJC_S011078 | NA | NA | NA | Sjp_0119220.1 | developmental process                         | NA       |
| unknown | NA | NA | NA | SJC_S011089 | NA | NA | NA | Sjp_0119230.1 | NA                                            | NA       |
| unknown | NA | NA | NA | SJC_S011117 | NA | NA | NA | Sjp_0119240.1 | NA                                            | NA       |
| unknown | NA | NA | NA | SJC_S011139 | NA | NA | NA | Sjp_0119250.1 | NA                                            | NA       |
| unknown | NA | NA | NA | SJC_S011195 | NA | NA | NA | Sjp_0119260.1 | NA                                            | NA       |
| unknown | NA | NA | NA | SJC_S011202 | NA | NA | NA | Sjp_0119270.1 | NA                                            | NA       |

|         |    |    |    |             |    |    |    |               |                               |          |
|---------|----|----|----|-------------|----|----|----|---------------|-------------------------------|----------|
| unknown | NA | NA | NA | SJC_S011206 | NA | NA | NA | Sjp_0119280.1 | NA                            | NA       |
| unknown | NA | NA | NA | SJC_S011211 | NA | NA | NA | Sjp_0119290.1 | NA                            | NA       |
| unknown | NA | NA | NA | SJC_S011222 | NA | NA | NA | Sjp_0119300.1 | NA                            | NA       |
| unknown | NA | NA | NA | SJC_S011224 | NA | NA | NA | Sjp_0119310.1 | NA                            | NA       |
| unknown | NA | NA | NA | SJC_S011226 | NA | NA | NA | Sjp_0119320.1 | NA                            | NA       |
| unknown | NA | NA | NA | SJC_S011238 | NA | NA | NA | Sjp_0119330.1 | NA                            | NA       |
| unknown | NA | NA | NA | SJC_S011254 | NA | NA | NA | Sjp_0119340.1 | NA                            | NA       |
| unknown | NA | NA | NA | SJC_S011264 | NA | NA | NA | Sjp_0119350.1 | NA                            | NA       |
| unknown | NA | NA | NA | SJC_S011267 | NA | NA | NA | Sjp_0119360.1 | NA                            | NA       |
| unknown | NA | NA | NA | SJC_S011278 | NA | NA | NA | Sjp_0119370.1 | NA                            | NA       |
| unknown | NA | NA | NA | SJC_S011362 | NA | NA | NA | Sjp_0119380.1 | binding                       | 0.052762 |
| unknown | NA | NA | NA | SJC_S011363 | NA | NA | NA | Sjp_0119390.1 | NA                            | NA       |
| unknown | NA | NA | NA | SJC_S011381 | NA | NA | NA | Sjp_0119400.1 | NA                            | NA       |
| unknown | NA | NA | NA | SJC_S011385 | NA | NA | NA | Sjp_0119410.1 | NA                            | NA       |
| unknown | NA | NA | NA | SJC_S011389 | NA | NA | NA | Sjp_0119420.1 | molecular transducer activity | 0.50162  |
| unknown | NA | NA | NA | SJC_S011427 | NA | NA | NA | Sjp_0119450.1 | NA                            | NA       |
| unknown | NA | NA | NA | SJC_S011428 | NA | NA | NA | Sjp_0119460.1 | NA                            | NA       |
| unknown | NA | NA | NA | SJC_S011434 | NA | NA | NA | Sjp_0119470.1 | NA                            | NA       |
| unknown | NA | NA | NA | SJC_S011449 | NA | NA | NA | Sjp_0119480.1 | NA                            | NA       |
| unknown | NA | NA | NA | SJC_S011451 | NA | NA | NA | Sjp_0119490.1 | establishment of localization | NA       |
| unknown | NA | NA | NA | SJC_S011462 | NA | NA | NA | Sjp_0119500.1 | NA                            | NA       |
| unknown | NA | NA | NA | SJC_S011463 | NA | NA | NA | Sjp_0119510.1 | NA                            | NA       |
| unknown | NA | NA | NA | SJC_S011507 | NA | NA | NA | Sjp_0119520.1 | NA                            | NA       |
| unknown | NA | NA | NA | SJC_S011520 | NA | NA | NA | Sjp_0119530.1 | binding                       | 0.052762 |
| unknown | NA | NA | NA | SJC_S011521 | NA | NA | NA | Sjp_0119540.1 | NA                            | NA       |
| unknown | NA | NA | NA | SJC_S011659 | NA | NA | NA | Sjp_0119560.1 | NA                            | NA       |
| unknown | NA | NA | NA | SJC_S011668 | NA | NA | NA | Sjp_0119570.1 | NA                            | NA       |
| unknown | NA | NA | NA | SJC_S011708 | NA | NA | NA | Sjp_0119580.1 | biological regulation         | 0.76396  |
| unknown | NA | NA | NA | SJC_S011721 | NA | NA | NA | Sjp_0119590.1 | response to stimulus          | NA       |

|         |    |    |    |             |    |    |    |               |                                  |          |
|---------|----|----|----|-------------|----|----|----|---------------|----------------------------------|----------|
| unknown | NA | NA | NA | SJC_S011772 | NA | NA | NA | Sjp_0119600.1 | NA                               | NA       |
| unknown | NA | NA | NA | SJC_S011825 | NA | NA | NA | Sjp_0119610.1 | NA                               | NA       |
| unknown | NA | NA | NA | SJC_S011844 | NA | NA | NA | Sjp_0119620.1 | NA                               | NA       |
| unknown | NA | NA | NA | SJC_S011849 | NA | NA | NA | Sjp_0119630.1 | NA                               | NA       |
| unknown | NA | NA | NA | SJC_S011855 | NA | NA | NA | Sjp_0119640.1 | catalytic activity               | 0.035844 |
| unknown | NA | NA | NA | SJC_S011867 | NA | NA | NA | Sjp_0119650.1 | catalytic activity               | 0.035844 |
| unknown | NA | NA | NA | SJC_S011868 | NA | NA | NA | Sjp_0119660.1 | catalytic activity               | 0.035844 |
| unknown | NA | NA | NA | SJC_S011909 | NA | NA | NA | Sjp_0119670.1 | NA                               | NA       |
| unknown | NA | NA | NA | SJC_S011927 | NA | NA | NA | Sjp_0119680.1 | NA                               | NA       |
| unknown | NA | NA | NA | SJC_S011946 | NA | NA | NA | Sjp_0119700.1 | NA                               | NA       |
| unknown | NA | NA | NA | SJC_S011949 | NA | NA | NA | Sjp_0119710.1 | NA                               | NA       |
| unknown | NA | NA | NA | SJC_S011995 | NA | NA | NA | Sjp_0119720.1 | catalytic activity               | 0.035844 |
| unknown | NA | NA | NA | SJC_S012014 | NA | NA | NA | Sjp_0119730.1 | NA                               | NA       |
| unknown | NA | NA | NA | SJC_S012018 | NA | NA | NA | Sjp_0119740.1 | catalytic activity               | 0.035844 |
| unknown | NA | NA | NA | SJC_S012034 | NA | NA | NA | Sjp_0119750.1 | binding                          | 0.052762 |
| unknown | NA | NA | NA | SJC_S012045 | NA | NA | NA | Sjp_0119760.1 | developmental process            | NA       |
| unknown | NA | NA | NA | SJC_S012088 | NA | NA | NA | Sjp_0119770.1 | catalytic activity               | 0.035844 |
| unknown | NA | NA | NA | SJC_S012114 | NA | NA | NA | Sjp_0119780.1 | NA                               | NA       |
| unknown | NA | NA | NA | SJC_S012133 | NA | NA | NA | Sjp_0119790.1 | NA                               | NA       |
| unknown | NA | NA | NA | SJC_S012155 | NA | NA | NA | Sjp_0119800.1 | NA                               | NA       |
| unknown | NA | NA | NA | SJC_S012163 | NA | NA | NA | Sjp_0119810.1 | NA                               | NA       |
| unknown | NA | NA | NA | SJC_S012172 | NA | NA | NA | Sjp_0119820.1 | NA                               | NA       |
| unknown | NA | NA | NA | SJC_S012175 | NA | NA | NA | Sjp_0119830.1 | NA                               | NA       |
| unknown | NA | NA | NA | SJC_S012192 | NA | NA | NA | Sjp_0119840.1 | NA                               | NA       |
| unknown | NA | NA | NA | SJC_S012212 | NA | NA | NA | Sjp_0119850.1 | NA                               | NA       |
| unknown | NA | NA | NA | SJC_S012243 | NA | NA | NA | Sjp_0119860.1 | NA                               | NA       |
| unknown | NA | NA | NA | SJC_S012265 | NA | NA | NA | Sjp_0119870.1 | NA                               | NA       |
| unknown | NA | NA | NA | SJC_S012289 | NA | NA | NA | Sjp_0119880.1 | NA                               | NA       |
| unknown | NA | NA | NA | SJC_S012331 | NA | NA | NA | Sjp_0119890.1 | NA                               | NA       |
| unknown | NA | NA | NA | SJC_S012343 | NA | NA | NA | Sjp_0119900.1 | transcription regulator activity | NA       |
| unknown | NA | NA | NA | SJC_S012353 | NA | NA | NA | Sjp_0119910.1 | NA                               | NA       |

|         |    |    |    |             |    |    |    |               |                            |          |
|---------|----|----|----|-------------|----|----|----|---------------|----------------------------|----------|
| unknown | NA | NA | NA | SJC_S012410 | NA | NA | NA | Sjp_0119920.1 | catalytic activity         | 0.035844 |
| unknown | NA | NA | NA | SJC_S012417 | NA | NA | NA | Sjp_0119930.1 | NA                         | NA       |
| unknown | NA | NA | NA | SJC_S012440 | NA | NA | NA | Sjp_0119940.1 | binding                    | 0.052762 |
| unknown | NA | NA | NA | SJC_S012443 | NA | NA | NA | Sjp_0119950.1 | NA                         | NA       |
| unknown | NA | NA | NA | SJC_S012447 | NA | NA | NA | Sjp_0119960.1 | NA                         | NA       |
| unknown | NA | NA | NA | SJC_S012456 | NA | NA | NA | Sjp_0119970.1 | NA                         | NA       |
| unknown | NA | NA | NA | SJC_S012460 | NA | NA | NA | Sjp_0119980.1 | NA                         | NA       |
| unknown | NA | NA | NA | SJC_S012465 | NA | NA | NA | Sjp_0119990.1 | NA                         | NA       |
| unknown | NA | NA | NA | SJC_S012495 | NA | NA | NA | Sjp_0120020.1 | NA                         | NA       |
| unknown | NA | NA | NA | SJC_S012499 | NA | NA | NA | Sjp_0120030.1 | biological regulation      | 0.76396  |
| unknown | NA | NA | NA | SJC_S012526 | NA | NA | NA | Sjp_0120060.1 | NA                         | NA       |
| unknown | NA | NA | NA | SJC_S012527 | NA | NA | NA | Sjp_0120070.1 | immune system process      | NA       |
| unknown | NA | NA | NA | SJC_S012540 | NA | NA | NA | Sjp_0120080.1 | NA                         | NA       |
| unknown | NA | NA | NA | SJC_S012549 | NA | NA | NA | Sjp_0120090.1 | NA                         | NA       |
| unknown | NA | NA | NA | SJC_S012568 | NA | NA | NA | Sjp_0120100.1 | NA                         | NA       |
| unknown | NA | NA | NA | SJC_S012573 | NA | NA | NA | Sjp_0120110.1 | channel regulator activity | NA       |
| unknown | NA | NA | NA | SJC_S012589 | NA | NA | NA | Sjp_0120120.1 | NA                         | NA       |
| unknown | NA | NA | NA | SJC_S012606 | NA | NA | NA | Sjp_0120130.1 | NA                         | NA       |
| unknown | NA | NA | NA | SJC_S012669 | NA | NA | NA | Sjp_0120150.1 | NA                         | NA       |
| unknown | NA | NA | NA | SJC_S012673 | NA | NA | NA | Sjp_0120160.1 | NA                         | NA       |
| unknown | NA | NA | NA | SJC_S012730 | NA | NA | NA | Sjp_0120180.1 | biological regulation      | 0.76396  |
| unknown | NA | NA | NA | SJC_S012732 | NA | NA | NA | Sjp_0120190.1 | catalytic activity         | 0.035844 |
| unknown | NA | NA | NA | SJC_S012735 | NA | NA | NA | Sjp_0120200.1 | cell part                  | 0.009037 |
| unknown | NA | NA | NA | SJC_S012737 | NA | NA | NA | Sjp_0120210.1 | catalytic activity         | 0.035844 |
| unknown | NA | NA | NA | SJC_S012757 | NA | NA | NA | Sjp_0120220.1 | NA                         | NA       |
| unknown | NA | NA | NA | SJC_S012773 | NA | NA | NA | Sjp_0120230.1 | cellular process           | 0.63852  |
| unknown | NA | NA | NA | SJC_S012775 | NA | NA | NA | Sjp_0120240.1 | NA                         | NA       |
| unknown | NA | NA | NA | SJC_S012797 | NA | NA | NA | Sjp_0120250.1 | NA                         | NA       |
| unknown | NA | NA | NA | SJC_S012802 | NA | NA | NA | Sjp_0120260.1 | transporter                | 0.782    |

|         |    |    |    |             |    |    |    |               |                           |          |
|---------|----|----|----|-------------|----|----|----|---------------|---------------------------|----------|
|         |    |    |    |             |    |    |    |               | activity                  |          |
| unknown | NA | NA | NA | SJC_S012871 | NA | NA | NA | Sjp_0120270.1 | NA                        | NA       |
| unknown | NA | NA | NA | SJC_S012900 | NA | NA | NA | Sjp_0120280.1 | NA                        | NA       |
| unknown | NA | NA | NA | SJC_S012909 | NA | NA | NA | Sjp_0120290.1 | NA                        | NA       |
| unknown | NA | NA | NA | SJC_S012937 | NA | NA | NA | Sjp_0120300.1 | NA                        | NA       |
| unknown | NA | NA | NA | SJC_S012978 | NA | NA | NA | Sjp_0120310.1 | NA                        | NA       |
| unknown | NA | NA | NA | SJC_S012980 | NA | NA | NA | Sjp_0120320.1 | NA                        | NA       |
| unknown | NA | NA | NA | SJC_S012982 | NA | NA | NA | Sjp_0120330.1 | NA                        | NA       |
| unknown | NA | NA | NA | SJC_S012984 | NA | NA | NA | Sjp_0120340.1 | NA                        | NA       |
| unknown | NA | NA | NA | SJC_S012991 | NA | NA | NA | Sjp_0120350.1 | NA                        | NA       |
| unknown | NA | NA | NA | SJC_S012999 | NA | NA | NA | Sjp_0120360.1 | NA                        | NA       |
| unknown | NA | NA | NA | SJC_S013008 | NA | NA | NA | Sjp_0120370.1 | NA                        | NA       |
| unknown | NA | NA | NA | SJC_S013042 | NA | NA | NA | Sjp_0120380.1 | NA                        | NA       |
| unknown | NA | NA | NA | SJC_S013063 | NA | NA | NA | Sjp_0120410.1 | NA                        | NA       |
| unknown | NA | NA | NA | SJC_S013065 | NA | NA | NA | Sjp_0120420.1 | transporter activity      | 0.782    |
| unknown | NA | NA | NA | SJC_S013068 | NA | NA | NA | Sjp_0120430.1 | NA                        | NA       |
| unknown | NA | NA | NA | SJC_S013079 | NA | NA | NA | Sjp_0120440.1 | NA                        | NA       |
| unknown | NA | NA | NA | SJC_S013119 | NA | NA | NA | Sjp_0120450.1 | catalytic activity        | 0.035844 |
| unknown | NA | NA | NA | SJC_S013136 | NA | NA | NA | Sjp_0120460.1 | NA                        | NA       |
| unknown | NA | NA | NA | SJC_S013143 | NA | NA | NA | Sjp_0120470.1 | NA                        | NA       |
| unknown | NA | NA | NA | SJC_S013144 | NA | NA | NA | Sjp_0120480.1 | binding                   | 0.052762 |
| unknown | NA | NA | NA | SJC_S013148 | NA | NA | NA | Sjp_0120490.1 | NA                        | NA       |
| unknown | NA | NA | NA | SJC_S013155 | NA | NA | NA | Sjp_0120500.1 | NA                        | NA       |
| unknown | NA | NA | NA | SJC_S013157 | NA | NA | NA | Sjp_0120510.1 | NA                        | NA       |
| unknown | NA | NA | NA | SJC_S013169 | NA | NA | NA | Sjp_0120520.1 | NA                        | NA       |
| unknown | NA | NA | NA | SJC_S013174 | NA | NA | NA | Sjp_0120530.1 | NA                        | NA       |
| unknown | NA | NA | NA | SJC_S013199 | NA | NA | NA | Sjp_0120540.1 | binding                   | 0.052762 |
| unknown | NA | NA | NA | SJC_S013226 | NA | NA | NA | Sjp_0120550.1 | enzyme regulator activity | 0.1755   |
| unknown | NA | NA | NA | SJC_S013239 | NA | NA | NA | Sjp_0120560.1 | NA                        | NA       |
| unknown | NA | NA | NA | SJC_S013243 | NA | NA | NA | Sjp_0120570.1 | NA                        | NA       |
| unknown | NA | NA | NA | SJC_S013252 | NA | NA | NA | Sjp_0120580.1 | NA                        | NA       |

|         |    |    |    |             |    |    |    |               |                           |          |
|---------|----|----|----|-------------|----|----|----|---------------|---------------------------|----------|
| unknown | NA | NA | NA | SJC_S013283 | NA | NA | NA | Sjp_0120590.1 | NA                        | NA       |
| unknown | NA | NA | NA | SJC_S013285 | NA | NA | NA | Sjp_0120600.1 | NA                        | NA       |
| unknown | NA | NA | NA | SJC_S013322 | NA | NA | NA | Sjp_0120610.1 | NA                        | NA       |
| unknown | NA | NA | NA | SJC_S013326 | NA | NA | NA | Sjp_0120620.1 | NA                        | NA       |
| unknown | NA | NA | NA | SJC_S013341 | NA | NA | NA | Sjp_0120630.1 | NA                        | NA       |
| unknown | NA | NA | NA | SJC_S013357 | NA | NA | NA | Sjp_0120640.1 | NA                        | NA       |
| unknown | NA | NA | NA | SJC_S013377 | NA | NA | NA | Sjp_0120650.1 | NA                        | NA       |
| unknown | NA | NA | NA | SJC_S013408 | NA | NA | NA | Sjp_0120660.1 | NA                        | NA       |
| unknown | NA | NA | NA | SJC_S013419 | NA | NA | NA | Sjp_0120670.1 | metabolic process         | 0.41934  |
| unknown | NA | NA | NA | SJC_S013439 | NA | NA | NA | Sjp_0120680.1 | NA                        | NA       |
| unknown | NA | NA | NA | SJC_S013480 | NA | NA | NA | Sjp_0120690.1 | catalytic activity        | 0.035844 |
| unknown | NA | NA | NA | SJC_S013491 | NA | NA | NA | Sjp_0120700.1 | NA                        | NA       |
| unknown | NA | NA | NA | SJC_S013498 | NA | NA | NA | Sjp_0120710.1 | NA                        | NA       |
| unknown | NA | NA | NA | SJC_S013514 | NA | NA | NA | Sjp_0120720.1 | NA                        | NA       |
| unknown | NA | NA | NA | SJC_S013523 | NA | NA | NA | Sjp_0120730.1 | NA                        | NA       |
| unknown | NA | NA | NA | SJC_S013545 | NA | NA | NA | Sjp_0120740.1 | NA                        | NA       |
| unknown | NA | NA | NA | SJC_S013548 | NA | NA | NA | Sjp_0120750.1 | NA                        | NA       |
| unknown | NA | NA | NA | SJC_S013551 | NA | NA | NA | Sjp_0120760.1 | enzyme regulator activity | 0.1755   |
| unknown | NA | NA | NA | SJC_S013552 | NA | NA | NA | Sjp_0120770.1 | NA                        | NA       |
| unknown | NA | NA | NA | SJC_S013556 | NA | NA | NA | Sjp_0120780.1 | NA                        | NA       |
| unknown | NA | NA | NA | SJC_S013563 | NA | NA | NA | Sjp_0120790.1 | NA                        | NA       |
| unknown | NA | NA | NA | SJC_S013569 | NA | NA | NA | Sjp_0120800.1 | cell part                 | 0.009037 |
| unknown | NA | NA | NA | SJC_S013580 | NA | NA | NA | Sjp_0120810.1 | NA                        | NA       |
| unknown | NA | NA | NA | SJC_S013604 | NA | NA | NA | Sjp_0120830.1 | NA                        | NA       |
| unknown | NA | NA | NA | SJC_S013609 | NA | NA | NA | Sjp_0120840.1 | NA                        | NA       |
| unknown | NA | NA | NA | SJC_S013610 | NA | NA | NA | Sjp_0120850.1 | NA                        | NA       |
| unknown | NA | NA | NA | SJC_S013621 | NA | NA | NA | Sjp_0120860.1 | NA                        | NA       |
| unknown | NA | NA | NA | SJC_S013648 | NA | NA | NA | Sjp_0120870.1 | enzyme regulator activity | 0.1755   |
| unknown | NA | NA | NA | SJC_S013654 | NA | NA | NA | Sjp_0120880.1 | NA                        | NA       |

|         |    |    |    |             |    |    |    |               |                           |          |
|---------|----|----|----|-------------|----|----|----|---------------|---------------------------|----------|
| unknown | NA | NA | NA | SJC_S013669 | NA | NA | NA | Sjp_0120900.1 | NA                        | NA       |
| unknown | NA | NA | NA | SJC_S013669 | NA | NA | NA | Sjp_0120910.1 | NA                        | NA       |
| unknown | NA | NA | NA | SJC_S013671 | NA | NA | NA | Sjp_0120920.1 | NA                        | NA       |
| unknown | NA | NA | NA | SJC_S013684 | NA | NA | NA | Sjp_0120930.1 | NA                        | NA       |
| unknown | NA | NA | NA | SJC_S013685 | NA | NA | NA | Sjp_0120940.1 | NA                        | NA       |
| unknown | NA | NA | NA | SJC_S013685 | NA | NA | NA | Sjp_0120950.1 | NA                        | NA       |
| unknown | NA | NA | NA | SJC_S013686 | NA | NA | NA | Sjp_0120960.1 | biological regulation     | 0.76396  |
| unknown | NA | NA | NA | SJC_S013687 | NA | NA | NA | Sjp_0120970.1 | NA                        | NA       |
| unknown | NA | NA | NA | SJC_S013690 | NA | NA | NA | Sjp_0120980.1 | NA                        | NA       |
| unknown | NA | NA | NA | SJC_S013691 | NA | NA | NA | Sjp_0120990.1 | catalytic activity        | 0.035844 |
| unknown | NA | NA | NA | SJC_S013695 | NA | NA | NA | Sjp_0121000.1 | NA                        | NA       |
| unknown | NA | NA | NA | SJC_S013698 | NA | NA | NA | Sjp_0121010.1 | cell part                 | 0.009037 |
| unknown | NA | NA | NA | SJC_S013715 | NA | NA | NA | Sjp_0121020.1 | biological regulation     | 0.76396  |
| unknown | NA | NA | NA | SJC_S013720 | NA | NA | NA | Sjp_0121030.1 | NA                        | NA       |
| unknown | NA | NA | NA | SJC_S013725 | NA | NA | NA | Sjp_0121040.1 | NA                        | NA       |
| unknown | NA | NA | NA | SJC_S013730 | NA | NA | NA | Sjp_0121050.1 | NA                        | NA       |
| unknown | NA | NA | NA | SJC_S013735 | NA | NA | NA | Sjp_0121060.1 | NA                        | NA       |
| unknown | NA | NA | NA | SJC_S013741 | NA | NA | NA | Sjp_0121070.1 | NA                        | NA       |
| unknown | NA | NA | NA | SJC_S013744 | NA | NA | NA | Sjp_0121080.1 | NA                        | NA       |
| unknown | NA | NA | NA | SJC_S013747 | NA | NA | NA | Sjp_0121090.1 | NA                        | NA       |
| unknown | NA | NA | NA | SJC_S013748 | NA | NA | NA | Sjp_0121100.1 | locomotion                | NA       |
| unknown | NA | NA | NA | SJC_S013752 | NA | NA | NA | Sjp_0121110.1 | NA                        | NA       |
| unknown | NA | NA | NA | SJC_S013753 | NA | NA | NA | Sjp_0121120.1 | cell part                 | 0.009037 |
| unknown | NA | NA | NA | SJC_S013758 | NA | NA | NA | Sjp_0121130.1 | NA                        | NA       |
| unknown | NA | NA | NA | SJC_S013759 | NA | NA | NA | Sjp_0121140.1 | NA                        | NA       |
| unknown | NA | NA | NA | SJC_S013761 | NA | NA | NA | Sjp_0121150.1 | cell part                 | 0.009037 |
| unknown | NA | NA | NA | SJC_S013775 | NA | NA | NA | Sjp_0121160.1 | electron carrier activity | NA       |
| unknown | NA | NA | NA | SJC_S013783 | NA | NA | NA | Sjp_0121170.1 | NA                        | NA       |
| unknown | NA | NA | NA | SJC_S013792 | NA | NA | NA | Sjp_0121180.1 | NA                        | NA       |
| unknown | NA | NA | NA | SJC_S013803 | NA | NA | NA | Sjp_0121190.1 | NA                        | NA       |
| unknown | NA | NA | NA | SJC_S013814 | NA | NA | NA | Sjp_0121200.1 | NA                        | NA       |



|         |    |    |    |             |    |    |    |               |                               |          |
|---------|----|----|----|-------------|----|----|----|---------------|-------------------------------|----------|
| unknown | NA | NA | NA | SJC_S013822 | NA | NA | NA | Sjp_0121220.1 | NA                            | NA       |
| unknown | NA | NA | NA | SJC_S013840 | NA | NA | NA | Sjp_0121230.1 | NA                            | NA       |
| unknown | NA | NA | NA | SJC_S013848 | NA | NA | NA | Sjp_0121240.1 | NA                            | NA       |
| unknown | NA | NA | NA | SJC_S013860 | NA | NA | NA | Sjp_0121250.1 | NA                            | NA       |
| unknown | NA | NA | NA | SJC_S013886 | NA | NA | NA | Sjp_0121260.1 | NA                            | NA       |
| unknown | NA | NA | NA | SJC_S013910 | NA | NA | NA | Sjp_0121270.1 | NA                            | NA       |
| unknown | NA | NA | NA | SJC_S013916 | NA | NA | NA | Sjp_0121280.1 | NA                            | NA       |
| unknown | NA | NA | NA | SJC_S013923 | NA | NA | NA | Sjp_0121290.1 | NA                            | NA       |
| unknown | NA | NA | NA | SJC_S013925 | NA | NA | NA | Sjp_0121300.1 | catalytic activity            | 0.035844 |
| unknown | NA | NA | NA | SJC_S013936 | NA | NA | NA | Sjp_0121310.1 | NA                            | NA       |
| unknown | NA | NA | NA | SJC_S013951 | NA | NA | NA | Sjp_0121320.1 | molecular transducer activity | 0.50162  |
| unknown | NA | NA | NA | SJC_S013952 | NA | NA | NA | Sjp_0121330.1 | NA                            | NA       |
| unknown | NA | NA | NA | SJC_S013961 | NA | NA | NA | Sjp_0121340.1 | NA                            | NA       |
| unknown | NA | NA | NA | SJC_S013971 | NA | NA | NA | Sjp_0121350.1 | NA                            | NA       |
| unknown | NA | NA | NA | SJC_S013978 | NA | NA | NA | Sjp_0121360.1 | establishment of localization | NA       |
| unknown | NA | NA | NA | SJC_S013998 | NA | NA | NA | Sjp_0121370.1 | cellular process              | 0.63852  |
| unknown | NA | NA | NA | SJC_S014014 | NA | NA | NA | Sjp_0121380.1 | NA                            | NA       |
| unknown | NA | NA | NA | SJC_S014021 | NA | NA | NA | Sjp_0121390.1 | NA                            | NA       |
| unknown | NA | NA | NA | SJC_S014025 | NA | NA | NA | Sjp_0121400.1 | NA                            | NA       |
| unknown | NA | NA | NA | SJC_S014027 | NA | NA | NA | Sjp_0121410.1 | NA                            | NA       |
| unknown | NA | NA | NA | SJC_S014036 | NA | NA | NA | Sjp_0121420.1 | binding                       | 0.052762 |
| unknown | NA | NA | NA | SJC_S014040 | NA | NA | NA | Sjp_0121430.1 | catalytic activity            | 0.035844 |
| unknown | NA | NA | NA | SJC_S014053 | NA | NA | NA | Sjp_0121450.1 | NA                            | NA       |
| unknown | NA | NA | NA | SJC_S014056 | NA | NA | NA | Sjp_0121460.1 | NA                            | NA       |
| unknown | NA | NA | NA | SJC_S014068 | NA | NA | NA | Sjp_0121480.1 | NA                            | NA       |
| unknown | NA | NA | NA | SJC_S014080 | NA | NA | NA | Sjp_0121490.1 | binding                       | 0.052762 |
| unknown | NA | NA | NA | SJC_S014100 | NA | NA | NA | Sjp_0121500.1 | NA                            | NA       |
| unknown | NA | NA | NA | SJC_S014110 | NA | NA | NA | Sjp_0121510.1 | binding                       | 0.052762 |
| unknown | NA | NA | NA | SJC_S014114 | NA | NA | NA | Sjp_0121520.1 | NA                            | NA       |
| unknown | NA | NA | NA | SJC_S014122 | NA | NA | NA | Sjp_0121530.1 | enzyme regulator              | 0.1755   |

|         |    |    |    |             |    |    |    |               |                       |          |
|---------|----|----|----|-------------|----|----|----|---------------|-----------------------|----------|
|         |    |    |    |             |    |    |    |               | activity              |          |
| unknown | NA | NA | NA | SJC_S014151 | NA | NA | NA | Sjp_0121540.1 | biological regulation | 0.76396  |
| unknown | NA | NA | NA | SJC_S014159 | NA | NA | NA | Sjp_0121550.1 | transporter activity  | 0.782    |
| unknown | NA | NA | NA | SJC_S014161 | NA | NA | NA | Sjp_0121560.1 | NA                    | NA       |
| unknown | NA | NA | NA | SJC_S014172 | NA | NA | NA | Sjp_0121570.1 | NA                    | NA       |
| unknown | NA | NA | NA | SJC_S014200 | NA | NA | NA | Sjp_0121580.1 | NA                    | NA       |
| unknown | NA | NA | NA | SJC_S014203 | NA | NA | NA | Sjp_0121590.1 | NA                    | NA       |
| unknown | NA | NA | NA | SJC_S014206 | NA | NA | NA | Sjp_0121600.1 | response to stimulus  | NA       |
| unknown | NA | NA | NA | SJC_S014208 | NA | NA | NA | Sjp_0121610.1 | NA                    | NA       |
| unknown | NA | NA | NA | SJC_S014210 | NA | NA | NA | Sjp_0121620.1 | biological regulation | 0.76396  |
| unknown | NA | NA | NA | SJC_S014211 | NA | NA | NA | Sjp_0121630.1 | NA                    | NA       |
| unknown | NA | NA | NA | SJC_S014212 | NA | NA | NA | Sjp_0121640.1 | binding               | 0.052762 |
| unknown | NA | NA | NA | SJC_S014235 | NA | NA | NA | Sjp_0121660.1 | NA                    | NA       |
| unknown | NA | NA | NA | SJC_S014236 | NA | NA | NA | Sjp_0121670.1 | NA                    | NA       |
| unknown | NA | NA | NA | SJC_S014237 | NA | NA | NA | Sjp_0121680.1 | binding               | 0.052762 |
| unknown | NA | NA | NA | SJC_S014240 | NA | NA | NA | Sjp_0121690.1 | NA                    | NA       |
| unknown | NA | NA | NA | SJC_S014247 | NA | NA | NA | Sjp_0121700.1 | biological regulation | 0.76396  |
| unknown | NA | NA | NA | SJC_S014256 | NA | NA | NA | Sjp_0121710.1 | NA                    | NA       |
| unknown | NA | NA | NA | SJC_S014259 | NA | NA | NA | Sjp_0121720.1 | NA                    | NA       |
| unknown | NA | NA | NA | SJC_S014264 | NA | NA | NA | Sjp_0121730.1 | biological regulation | 0.76396  |
| unknown | NA | NA | NA | SJC_S014267 | NA | NA | NA | Sjp_0121740.1 | NA                    | NA       |
| unknown | NA | NA | NA | SJC_S014275 | NA | NA | NA | Sjp_0121750.1 | NA                    | NA       |
| unknown | NA | NA | NA | SJC_S014277 | NA | NA | NA | Sjp_0121760.1 | NA                    | NA       |
| unknown | NA | NA | NA | SJC_S014297 | NA | NA | NA | Sjp_0121770.1 | NA                    | NA       |
| unknown | NA | NA | NA | SJC_S014301 | NA | NA | NA | Sjp_0121780.1 | NA                    | NA       |
| unknown | NA | NA | NA | SJC_S014302 | NA | NA | NA | Sjp_0121790.1 | NA                    | NA       |
| unknown | NA | NA | NA | SJC_S014309 | NA | NA | NA | Sjp_0121800.1 | enzyme regulator      | 0.1755   |

|         |    |    |    |             |    |    |    |               |                       |          |
|---------|----|----|----|-------------|----|----|----|---------------|-----------------------|----------|
|         |    |    |    |             |    |    |    |               | activity              |          |
| unknown | NA | NA | NA | SJC_S014310 | NA | NA | NA | Sjp_0121810.1 | NA                    | NA       |
| unknown | NA | NA | NA | SJC_S014316 | NA | NA | NA | Sjp_0121820.1 | NA                    | NA       |
| unknown | NA | NA | NA | SJC_S014334 | NA | NA | NA | Sjp_0121830.1 | cellular process      | 0.63852  |
| unknown | NA | NA | NA | SJC_S014344 | NA | NA | NA | Sjp_0121840.1 | NA                    | NA       |
| unknown | NA | NA | NA | SJC_S014345 | NA | NA | NA | Sjp_0121850.1 | NA                    | NA       |
| unknown | NA | NA | NA | SJC_S014351 | NA | NA | NA | Sjp_0121860.1 | NA                    | NA       |
| unknown | NA | NA | NA | SJC_S014353 | NA | NA | NA | Sjp_0121870.1 | NA                    | NA       |
| unknown | NA | NA | NA | SJC_S014357 | NA | NA | NA | Sjp_0121880.1 | NA                    | NA       |
| unknown | NA | NA | NA | SJC_S014360 | NA | NA | NA | Sjp_0121890.1 | NA                    | NA       |
| unknown | NA | NA | NA | SJC_S014384 | NA | NA | NA | Sjp_0121900.1 | NA                    | NA       |
| unknown | NA | NA | NA | SJC_S014387 | NA | NA | NA | Sjp_0121910.1 | NA                    | NA       |
| unknown | NA | NA | NA | SJC_S014389 | NA | NA | NA | Sjp_0121920.1 | biological regulation | 0.76396  |
| unknown | NA | NA | NA | SJC_S014390 | NA | NA | NA | Sjp_0121930.1 | NA                    | NA       |
| unknown | NA | NA | NA | SJC_S014396 | NA | NA | NA | Sjp_0121940.1 | biological regulation | 0.76396  |
| unknown | NA | NA | NA | SJC_S014397 | NA | NA | NA | Sjp_0121950.1 | cell part             | 0.009037 |
| unknown | NA | NA | NA | SJC_S014399 | NA | NA | NA | Sjp_0121960.1 | cell part             | 0.009037 |
| unknown | NA | NA | NA | SJC_S014403 | NA | NA | NA | Sjp_0121970.1 | NA                    | NA       |
| unknown | NA | NA | NA | SJC_S014404 | NA | NA | NA | Sjp_0121980.1 | catalytic activity    | 0.035844 |
| unknown | NA | NA | NA | SJC_S014406 | NA | NA | NA | Sjp_0121990.1 | NA                    | NA       |
| unknown | NA | NA | NA | SJC_S014408 | NA | NA | NA | Sjp_0122000.1 | NA                    | NA       |
| unknown | NA | NA | NA | SJC_S014412 | NA | NA | NA | Sjp_0122010.1 | NA                    | NA       |
| unknown | NA | NA | NA | SJC_S014415 | NA | NA | NA | Sjp_0122020.1 | catalytic activity    | 0.035844 |
| unknown | NA | NA | NA | SJC_S014416 | NA | NA | NA | Sjp_0122030.1 | biological regulation | 0.76396  |
| unknown | NA | NA | NA | SJC_S014426 | NA | NA | NA | Sjp_0122040.1 | biological regulation | 0.76396  |
| unknown | NA | NA | NA | SJC_S014427 | NA | NA | NA | Sjp_0122050.1 | NA                    | NA       |
| unknown | NA | NA | NA | SJC_S014429 | NA | NA | NA | Sjp_0122060.1 | NA                    | NA       |
| unknown | NA | NA | NA | SJC_S014430 | NA | NA | NA | Sjp_0122070.1 | NA                    | NA       |
| unknown | NA | NA | NA | SJC_S014431 | NA | NA | NA | Sjp_0122080.1 | NA                    | NA       |
| unknown | NA | NA | NA | SJC_S014433 | NA | NA | NA | Sjp_0122090.1 | NA                    | NA       |

|         |    |    |    |             |    |    |    |               |                       |          |
|---------|----|----|----|-------------|----|----|----|---------------|-----------------------|----------|
| unknown | NA | NA | NA | SJC_S014435 | NA | NA | NA | Sjp_0122100.1 | NA                    | NA       |
| unknown | NA | NA | NA | SJC_S014439 | NA | NA | NA | Sjp_0122110.1 | NA                    | NA       |
| unknown | NA | NA | NA | SJC_S014441 | NA | NA | NA | Sjp_0122120.1 | binding               | 0.052762 |
| unknown | NA | NA | NA | SJC_S014446 | NA | NA | NA | Sjp_0122130.1 | NA                    | NA       |
| unknown | NA | NA | NA | SJC_S014446 | NA | NA | NA | Sjp_0122140.1 | NA                    | NA       |
| unknown | NA | NA | NA | SJC_S014450 | NA | NA | NA | Sjp_0122150.1 | biological regulation | 0.76396  |
| unknown | NA | NA | NA | SJC_S014452 | NA | NA | NA | Sjp_0122160.1 | NA                    | NA       |
| unknown | NA | NA | NA | SJC_S014453 | NA | NA | NA | Sjp_0122170.1 | NA                    | NA       |
| unknown | NA | NA | NA | SJC_S014459 | NA | NA | NA | Sjp_0122180.1 | NA                    | NA       |
| unknown | NA | NA | NA | SJC_S014460 | NA | NA | NA | Sjp_0122190.1 | transporter activity  | 0.782    |
| unknown | NA | NA | NA | SJC_S014464 | NA | NA | NA | Sjp_0122200.1 | NA                    | NA       |
| unknown | NA | NA | NA | SJC_S014477 | NA | NA | NA | Sjp_0122220.1 | NA                    | NA       |
| unknown | NA | NA | NA | SJC_S014483 | NA | NA | NA | Sjp_0122230.1 | biological regulation | 0.76396  |
| unknown | NA | NA | NA | SJC_S014506 | NA | NA | NA | Sjp_0122240.1 | NA                    | NA       |
| unknown | NA | NA | NA | SJC_S014521 | NA | NA | NA | Sjp_0122270.1 | NA                    | NA       |
| unknown | NA | NA | NA | SJC_S014535 | NA | NA | NA | Sjp_0122280.1 | NA                    | NA       |
| unknown | NA | NA | NA | SJC_S014536 | NA | NA | NA | Sjp_0122290.1 | NA                    | NA       |
| unknown | NA | NA | NA | SJC_S014537 | NA | NA | NA | Sjp_0122300.1 | NA                    | NA       |
| unknown | NA | NA | NA | SJC_S014547 | NA | NA | NA | Sjp_0122310.1 | NA                    | NA       |
| unknown | NA | NA | NA | SJC_S014569 | NA | NA | NA | Sjp_0122330.1 | NA                    | NA       |
| unknown | NA | NA | NA | SJC_S014575 | NA | NA | NA | Sjp_0122340.1 | NA                    | NA       |
| unknown | NA | NA | NA | SJC_S014586 | NA | NA | NA | Sjp_0122350.1 | NA                    | NA       |
| unknown | NA | NA | NA | SJC_S014608 | NA | NA | NA | Sjp_0122390.1 | NA                    | NA       |
| unknown | NA | NA | NA | SJC_S014620 | NA | NA | NA | Sjp_0122410.1 | NA                    | NA       |
| unknown | NA | NA | NA | SJC_S014630 | NA | NA | NA | Sjp_0122420.1 | NA                    | NA       |
| unknown | NA | NA | NA | SJC_S014646 | NA | NA | NA | Sjp_0122430.1 | catalytic activity    | 0.035844 |
| unknown | NA | NA | NA | SJC_S014654 | NA | NA | NA | Sjp_0122440.1 | NA                    | NA       |
| unknown | NA | NA | NA | SJC_S014664 | NA | NA | NA | Sjp_0122450.1 | NA                    | NA       |
| unknown | NA | NA | NA | SJC_S014671 | NA | NA | NA | Sjp_0122460.1 | NA                    | NA       |
| unknown | NA | NA | NA | SJC_S014689 | NA | NA | NA | Sjp_0122480.1 | NA                    | NA       |
| unknown | NA | NA | NA | SJC_S014692 | NA | NA | NA | Sjp_0122490.1 | NA                    | NA       |

|         |    |    |    |             |    |    |    |               |                               |          |
|---------|----|----|----|-------------|----|----|----|---------------|-------------------------------|----------|
| unknown | NA | NA | NA | SJC_S014702 | NA | NA | NA | Sjp_0122500.1 | NA                            | NA       |
| unknown | NA | NA | NA | SJC_S014705 | NA | NA | NA | Sjp_0122510.1 | NA                            | NA       |
| unknown | NA | NA | NA | SJC_S014760 | NA | NA | NA | Sjp_0122520.1 | metabolic process             | 0.41934  |
| unknown | NA | NA | NA | SJC_S014766 | NA | NA | NA | Sjp_0122540.1 | NA                            | NA       |
| unknown | NA | NA | NA | SJC_S014776 | NA | NA | NA | Sjp_0122550.1 | binding                       | 0.052762 |
| unknown | NA | NA | NA | SJC_S014787 | NA | NA | NA | Sjp_0122560.1 | NA                            | NA       |
| unknown | NA | NA | NA | SJC_S014808 | NA | NA | NA | Sjp_0122570.1 | catalytic activity            | 0.035844 |
| unknown | NA | NA | NA | SJC_S014832 | NA | NA | NA | Sjp_0122580.1 | NA                            | NA       |
| unknown | NA | NA | NA | SJC_S014847 | NA | NA | NA | Sjp_0122610.1 | NA                            | NA       |
| unknown | NA | NA | NA | SJC_S014853 | NA | NA | NA | Sjp_0122620.1 | NA                            | NA       |
| unknown | NA | NA | NA | SJC_S014854 | NA | NA | NA | Sjp_0122630.1 | binding                       | 0.052762 |
| unknown | NA | NA | NA | SJC_S014855 | NA | NA | NA | Sjp_0122640.1 | catalytic activity            | 0.035844 |
| unknown | NA | NA | NA | SJC_S014856 | NA | NA | NA | Sjp_0122650.1 | NA                            | NA       |
| unknown | NA | NA | NA | SJC_S014858 | NA | NA | NA | Sjp_0122660.1 | NA                            | NA       |
| unknown | NA | NA | NA | SJC_S014861 | NA | NA | NA | Sjp_0122680.1 | NA                            | NA       |
| unknown | NA | NA | NA | SJC_S014878 | NA | NA | NA | Sjp_0122690.1 | NA                            | NA       |
| unknown | NA | NA | NA | SJC_S014888 | NA | NA | NA | Sjp_0122700.1 | NA                            | NA       |
| unknown | NA | NA | NA | SJC_S014898 | NA | NA | NA | Sjp_0122710.1 | establishment of localization | NA       |
| unknown | NA | NA | NA | SJC_S014906 | NA | NA | NA | Sjp_0122720.1 | NA                            | NA       |
| unknown | NA | NA | NA | SJC_S014915 | NA | NA | NA | Sjp_0122730.1 | metabolic process             | 0.41934  |
| unknown | NA | NA | NA | SJC_S014925 | NA | NA | NA | Sjp_0122740.1 | NA                            | NA       |
| unknown | NA | NA | NA | SJC_S014930 | NA | NA | NA | Sjp_0122750.1 | cell part                     | 0.009037 |
| unknown | NA | NA | NA | SJC_S014939 | NA | NA | NA | Sjp_0122760.1 | NA                            | NA       |
| unknown | NA | NA | NA | SJC_S014947 | NA | NA | NA | Sjp_0122770.1 | catalytic activity            | 0.035844 |
| unknown | NA | NA | NA | SJC_S014949 | NA | NA | NA | Sjp_0122780.1 | NA                            | NA       |
| unknown | NA | NA | NA | SJC_S014958 | NA | NA | NA | Sjp_0122790.1 | catalytic activity            | 0.035844 |
| unknown | NA | NA | NA | SJC_S014974 | NA | NA | NA | Sjp_0122800.1 | metabolic process             | 0.41934  |
| unknown | NA | NA | NA | SJC_S014990 | NA | NA | NA | Sjp_0122810.1 | NA                            | NA       |
| unknown | NA | NA | NA | SJC_S015015 | NA | NA | NA | Sjp_0122820.1 | NA                            | NA       |
| unknown | NA | NA | NA | SJC_S015078 | NA | NA | NA | Sjp_0122840.1 | metabolic                     | 0.41934  |

|         |    |    |    |             |    |    |    |               |                           |          |
|---------|----|----|----|-------------|----|----|----|---------------|---------------------------|----------|
|         |    |    |    |             |    |    |    |               | process                   |          |
| unknown | NA | NA | NA | SJC_S015107 | NA | NA | NA | Sjp_0122850.1 | NA                        | NA       |
| unknown | NA | NA | NA | SJC_S015141 | NA | NA | NA | Sjp_0122870.1 | NA                        | NA       |
| unknown | NA | NA | NA | SJC_S015153 | NA | NA | NA | Sjp_0122880.1 | biological regulation     | 0.76396  |
| unknown | NA | NA | NA | SJC_S015193 | NA | NA | NA | Sjp_0122900.1 | NA                        | NA       |
| unknown | NA | NA | NA | SJC_S015199 | NA | NA | NA | Sjp_0122910.1 | NA                        | NA       |
| unknown | NA | NA | NA | SJC_S015212 | NA | NA | NA | Sjp_0122920.1 | NA                        | NA       |
| unknown | NA | NA | NA | SJC_S015217 | NA | NA | NA | Sjp_0122930.1 | NA                        | NA       |
| unknown | NA | NA | NA | SJC_S015233 | NA | NA | NA | Sjp_0122940.1 | NA                        | NA       |
| unknown | NA | NA | NA | SJC_S015249 | NA | NA | NA | Sjp_0122950.1 | NA                        | NA       |
| unknown | NA | NA | NA | SJC_S015259 | NA | NA | NA | Sjp_0122960.1 | NA                        | NA       |
| unknown | NA | NA | NA | SJC_S015265 | NA | NA | NA | Sjp_0122970.1 | NA                        | NA       |
| unknown | NA | NA | NA | SJC_S015267 | NA | NA | NA | Sjp_0122980.1 | electron carrier activity | NA       |
| unknown | NA | NA | NA | SJC_S015269 | NA | NA | NA | Sjp_0122990.1 | NA                        | NA       |
| unknown | NA | NA | NA | SJC_S015297 | NA | NA | NA | Sjp_0123020.1 | catalytic activity        | 0.035844 |
| unknown | NA | NA | NA | SJC_S015360 | NA | NA | NA | Sjp_0123040.1 | NA                        | NA       |
| unknown | NA | NA | NA | SJC_S015364 | NA | NA | NA | Sjp_0123050.1 | NA                        | NA       |
| unknown | NA | NA | NA | SJC_S015385 | NA | NA | NA | Sjp_0123060.1 | cell part                 | 0.009037 |
| unknown | NA | NA | NA | SJC_S015401 | NA | NA | NA | Sjp_0123070.1 | NA                        | NA       |
| unknown | NA | NA | NA | SJC_S015408 | NA | NA | NA | Sjp_0123080.1 | NA                        | NA       |
| unknown | NA | NA | NA | SJC_S015464 | NA | NA | NA | Sjp_0123110.1 | NA                        | NA       |
| unknown | NA | NA | NA | SJC_S015487 | NA | NA | NA | Sjp_0123130.1 | NA                        | NA       |
| unknown | NA | NA | NA | SJC_S015493 | NA | NA | NA | Sjp_0123140.1 | NA                        | NA       |
| unknown | NA | NA | NA | SJC_S015494 | NA | NA | NA | Sjp_0123150.1 | cell part                 | 0.009037 |
| unknown | NA | NA | NA | SJC_S015497 | NA | NA | NA | Sjp_0123160.1 | NA                        | NA       |
| unknown | NA | NA | NA | SJC_S015533 | NA | NA | NA | Sjp_0123180.1 | cellular process          | 0.63852  |
| unknown | NA | NA | NA | SJC_S015556 | NA | NA | NA | Sjp_0123190.1 | NA                        | NA       |
| unknown | NA | NA | NA | SJC_S015560 | NA | NA | NA | Sjp_0123200.1 | NA                        | NA       |
| unknown | NA | NA | NA | SJC_S015574 | NA | NA | NA | Sjp_0123210.1 | transporter activity      | 0.782    |
| unknown | NA | NA | NA | SJC_S015576 | NA | NA | NA | Sjp_0123230.1 | NA                        | NA       |
| unknown | NA | NA | NA | SJC_S015607 | NA | NA | NA | Sjp_0123240.1 | electron carrier          | NA       |

|         |    |    |    |             |    |    |    |               |                           |          |
|---------|----|----|----|-------------|----|----|----|---------------|---------------------------|----------|
|         |    |    |    |             |    |    |    |               | activity                  |          |
| unknown | NA | NA | NA | SJC_S015618 | NA | NA | NA | Sjp_0123250.1 | cellular process          | 0.63852  |
| unknown | NA | NA | NA | SJC_S015648 | NA | NA | NA | Sjp_0123260.1 | NA                        | NA       |
| unknown | NA | NA | NA | SJC_S015654 | NA | NA | NA | Sjp_0123270.1 | NA                        | NA       |
| unknown | NA | NA | NA | SJC_S015666 | NA | NA | NA | Sjp_0123280.1 | catalytic activity        | 0.035844 |
| unknown | NA | NA | NA | SJC_S015668 | NA | NA | NA | Sjp_0123290.1 | catalytic activity        | 0.035844 |
| unknown | NA | NA | NA | SJC_S015688 | NA | NA | NA | Sjp_0123300.1 | NA                        | NA       |
| unknown | NA | NA | NA | SJC_S015696 | NA | NA | NA | Sjp_0123310.1 | NA                        | NA       |
| unknown | NA | NA | NA | SJC_S015733 | NA | NA | NA | Sjp_0123340.1 | NA                        | NA       |
| unknown | NA | NA | NA | SJC_S015752 | NA | NA | NA | Sjp_0123350.1 | biological regulation     | 0.76396  |
| unknown | NA | NA | NA | SJC_S015761 | NA | NA | NA | Sjp_0123360.1 | NA                        | NA       |
| unknown | NA | NA | NA | SJC_S015779 | NA | NA | NA | Sjp_0123370.1 | NA                        | NA       |
| unknown | NA | NA | NA | SJC_S015791 | NA | NA | NA | Sjp_0123390.1 | NA                        | NA       |
| unknown | NA | NA | NA | SJC_S015814 | NA | NA | NA | Sjp_0123400.1 | NA                        | NA       |
| unknown | NA | NA | NA | SJC_S015822 | NA | NA | NA | Sjp_0123410.1 | NA                        | NA       |
| unknown | NA | NA | NA | SJC_S015834 | NA | NA | NA | Sjp_0123420.1 | NA                        | NA       |
| unknown | NA | NA | NA | SJC_S015836 | NA | NA | NA | Sjp_0123430.1 | NA                        | NA       |
| unknown | NA | NA | NA | SJC_S015850 | NA | NA | NA | Sjp_0123440.1 | cell part                 | 0.009037 |
| unknown | NA | NA | NA | SJC_S015859 | NA | NA | NA | Sjp_0123460.1 | catalytic activity        | 0.035844 |
| unknown | NA | NA | NA | SJC_S015876 | NA | NA | NA | Sjp_0123470.1 | NA                        | NA       |
| unknown | NA | NA | NA | SJC_S015878 | NA | NA | NA | Sjp_0123480.1 | NA                        | NA       |
| unknown | NA | NA | NA | SJC_S015890 | NA | NA | NA | Sjp_0123490.1 | electron carrier activity | NA       |
| unknown | NA | NA | NA | SJC_S015907 | NA | NA | NA | Sjp_0123500.1 | NA                        | NA       |
| unknown | NA | NA | NA | SJC_S015918 | NA | NA | NA | Sjp_0123510.1 | cell part                 | 0.009037 |
| unknown | NA | NA | NA | SJC_S015945 | NA | NA | NA | Sjp_0123520.1 | NA                        | NA       |
| unknown | NA | NA | NA | SJC_S015953 | NA | NA | NA | Sjp_0123530.1 | catalytic activity        | 0.035844 |
| unknown | NA | NA | NA | SJC_S015964 | NA | NA | NA | Sjp_0123540.1 | NA                        | NA       |
| unknown | NA | NA | NA | SJC_S016008 | NA | NA | NA | Sjp_0123570.1 | catalytic activity        | 0.035844 |
| unknown | NA | NA | NA | SJC_S016029 | NA | NA | NA | Sjp_0123580.1 | NA                        | NA       |
| unknown | NA | NA | NA | SJC_S016048 | NA | NA | NA | Sjp_0123590.1 | NA                        | NA       |
| unknown | NA | NA | NA | SJC_S016101 | NA | NA | NA | Sjp_0123600.1 | metabolic process         | 0.41934  |

|         |    |    |    |             |    |    |    |               |                           |          |
|---------|----|----|----|-------------|----|----|----|---------------|---------------------------|----------|
| unknown | NA | NA | NA | SJC_S016124 | NA | NA | NA | Sjp_0123610.1 | catalytic activity        | 0.035844 |
| unknown | NA | NA | NA | SJC_S016146 | NA | NA | NA | Sjp_0123620.1 | NA                        | NA       |
| unknown | NA | NA | NA | SJC_S016163 | NA | NA | NA | Sjp_0123630.1 | NA                        | NA       |
| unknown | NA | NA | NA | SJC_S016203 | NA | NA | NA | Sjp_0123640.1 | NA                        | NA       |
| unknown | NA | NA | NA | SJC_S016267 | NA | NA | NA | Sjp_0123650.1 | NA                        | NA       |
| unknown | NA | NA | NA | SJC_S016363 | NA | NA | NA | Sjp_0123690.1 | NA                        | NA       |
| unknown | NA | NA | NA | SJC_S016368 | NA | NA | NA | Sjp_0123700.1 | electron carrier activity | NA       |
| unknown | NA | NA | NA | SJC_S016372 | NA | NA | NA | Sjp_0123710.1 | NA                        | NA       |
| unknown | NA | NA | NA | SJC_S016375 | NA | NA | NA | Sjp_0123720.1 | NA                        | NA       |
| unknown | NA | NA | NA | SJC_S016472 | NA | NA | NA | Sjp_0123730.1 | electron carrier activity | NA       |
| unknown | NA | NA | NA | SJC_S016495 | NA | NA | NA | Sjp_0123740.1 | NA                        | NA       |
| unknown | NA | NA | NA | SJC_S016502 | NA | NA | NA | Sjp_0123750.1 | NA                        | NA       |
| unknown | NA | NA | NA | SJC_S016517 | NA | NA | NA | Sjp_0123760.1 | NA                        | NA       |
| unknown | NA | NA | NA | SJC_S016525 | NA | NA | NA | Sjp_0123780.1 | NA                        | NA       |
| unknown | NA | NA | NA | SJC_S016531 | NA | NA | NA | Sjp_0123790.1 | NA                        | NA       |
| unknown | NA | NA | NA | SJC_S016605 | NA | NA | NA | Sjp_0123800.1 | catalytic activity        | 0.035844 |
| unknown | NA | NA | NA | SJC_S016605 | NA | NA | NA | Sjp_0123810.1 | NA                        | NA       |
| unknown | NA | NA | NA | SJC_S016624 | NA | NA | NA | Sjp_0123820.1 | NA                        | NA       |
| unknown | NA | NA | NA | SJC_S016666 | NA | NA | NA | Sjp_0123830.1 | NA                        | NA       |
| unknown | NA | NA | NA | SJC_S016696 | NA | NA | NA | Sjp_0123840.1 | NA                        | NA       |
| unknown | NA | NA | NA | SJC_S016724 | NA | NA | NA | Sjp_0123850.1 | NA                        | NA       |
| unknown | NA | NA | NA | SJC_S016732 | NA | NA | NA | Sjp_0123860.1 | NA                        | NA       |
| unknown | NA | NA | NA | SJC_S016738 | NA | NA | NA | Sjp_0123870.1 | NA                        | NA       |
| unknown | NA | NA | NA | SJC_S016750 | NA | NA | NA | Sjp_0123880.1 | catalytic activity        | 0.035844 |
| unknown | NA | NA | NA | SJC_S016761 | NA | NA | NA | Sjp_0123890.1 | NA                        | NA       |
| unknown | NA | NA | NA | SJC_S016787 | NA | NA | NA | Sjp_0123900.1 | NA                        | NA       |
| unknown | NA | NA | NA | SJC_S016797 | NA | NA | NA | Sjp_0123910.1 | NA                        | NA       |
| unknown | NA | NA | NA | SJC_S016994 | NA | NA | NA | Sjp_0123950.1 | NA                        | NA       |
| unknown | NA | NA | NA | SJC_S016998 | NA | NA | NA | Sjp_0123960.1 | NA                        | NA       |
| unknown | NA | NA | NA | SJC_S017018 | NA | NA | NA | Sjp_0123970.1 | NA                        | NA       |
| unknown | NA | NA | NA | SJC_S017019 | NA | NA | NA | Sjp_0123980.1 | NA                        | NA       |
| unknown | NA | NA | NA | SJC_S017033 | NA | NA | NA | Sjp_0123990.1 | NA                        | NA       |



|         |    |    |    |             |    |    |    |               |                           |          |
|---------|----|----|----|-------------|----|----|----|---------------|---------------------------|----------|
| unknown | NA | NA | NA | SJC_S017041 | NA | NA | NA | Sjp_0124000.1 | NA                        | NA       |
| unknown | NA | NA | NA | SJC_S017082 | NA | NA | NA | Sjp_0124010.1 | NA                        | NA       |
| unknown | NA | NA | NA | SJC_S017104 | NA | NA | NA | Sjp_0124020.1 | NA                        | NA       |
| unknown | NA | NA | NA | SJC_S017148 | NA | NA | NA | Sjp_0124040.1 | NA                        | NA       |
| unknown | NA | NA | NA | SJC_S017154 | NA | NA | NA | Sjp_0124050.1 | NA                        | NA       |
| unknown | NA | NA | NA | SJC_S017236 | NA | NA | NA | Sjp_0124070.1 | NA                        | NA       |
| unknown | NA | NA | NA | SJC_S017240 | NA | NA | NA | Sjp_0124080.1 | catalytic activity        | 0.035844 |
| unknown | NA | NA | NA | SJC_S017247 | NA | NA | NA | Sjp_0124090.1 | NA                        | NA       |
| unknown | NA | NA | NA | SJC_S017250 | NA | NA | NA | Sjp_0124100.1 | NA                        | NA       |
| unknown | NA | NA | NA | SJC_S017267 | NA | NA | NA | Sjp_0124110.1 | binding                   | 0.052762 |
| unknown | NA | NA | NA | SJC_S017273 | NA | NA | NA | Sjp_0124120.1 | NA                        | NA       |
| unknown | NA | NA | NA | SJC_S017282 | NA | NA | NA | Sjp_0124130.1 | biological regulation     | 0.76396  |
| unknown | NA | NA | NA | SJC_S017285 | NA | NA | NA | Sjp_0124140.1 | NA                        | NA       |
| unknown | NA | NA | NA | SJC_S017287 | NA | NA | NA | Sjp_0124150.1 | catalytic activity        | 0.035844 |
| unknown | NA | NA | NA | SJC_S017297 | NA | NA | NA | Sjp_0124160.1 | NA                        | NA       |
| unknown | NA | NA | NA | SJC_S017299 | NA | NA | NA | Sjp_0124170.1 | NA                        | NA       |
| unknown | NA | NA | NA | SJC_S017302 | NA | NA | NA | Sjp_0124180.1 | NA                        | NA       |
| unknown | NA | NA | NA | SJC_S017304 | NA | NA | NA | Sjp_0124190.1 | NA                        | NA       |
| unknown | NA | NA | NA | SJC_S017328 | NA | NA | NA | Sjp_0124200.1 | electron carrier activity | NA       |
| unknown | NA | NA | NA | SJC_S017347 | NA | NA | NA | Sjp_0124210.1 | NA                        | NA       |
| unknown | NA | NA | NA | SJC_S017357 | NA | NA | NA | Sjp_0124230.1 | NA                        | NA       |
| unknown | NA | NA | NA | SJC_S017361 | NA | NA | NA | Sjp_0124240.1 | electron carrier activity | NA       |
| unknown | NA | NA | NA | SJC_S017368 | NA | NA | NA | Sjp_0124250.1 | NA                        | NA       |
| unknown | NA | NA | NA | SJC_S017412 | NA | NA | NA | Sjp_0124280.1 | NA                        | NA       |
| unknown | NA | NA | NA | SJC_S017436 | NA | NA | NA | Sjp_0124290.1 | NA                        | NA       |
| unknown | NA | NA | NA | SJC_S017437 | NA | NA | NA | Sjp_0124300.1 | electron carrier activity | NA       |
| unknown | NA | NA | NA | SJC_S017452 | NA | NA | NA | Sjp_0124320.1 | electron carrier activity | NA       |
| unknown | NA | NA | NA | SJC_S017458 | NA | NA | NA | Sjp_0124330.1 | NA                        | NA       |
| unknown | NA | NA | NA | SJC_S017460 | NA | NA | NA | Sjp_0124340.1 | catalytic activity        | 0.035844 |

|         |    |    |    |             |    |    |    |               |                           |          |
|---------|----|----|----|-------------|----|----|----|---------------|---------------------------|----------|
| unknown | NA | NA | NA | SJC_S017481 | NA | NA | NA | Sjp_0124360.1 | NA                        | NA       |
| unknown | NA | NA | NA | SJC_S017482 | NA | NA | NA | Sjp_0124370.1 | electron carrier activity | NA       |
| unknown | NA | NA | NA | SJC_S017484 | NA | NA | NA | Sjp_0124380.1 | NA                        | NA       |
| unknown | NA | NA | NA | SJC_S017498 | NA | NA | NA | Sjp_0124400.1 | electron carrier activity | NA       |
| unknown | NA | NA | NA | SJC_S017521 | NA | NA | NA | Sjp_0124410.1 | NA                        | NA       |
| unknown | NA | NA | NA | SJC_S017565 | NA | NA | NA | Sjp_0124420.1 | NA                        | NA       |
| unknown | NA | NA | NA | SJC_S017567 | NA | NA | NA | Sjp_0124430.1 | NA                        | NA       |
| unknown | NA | NA | NA | SJC_S017573 | NA | NA | NA | Sjp_0124440.1 | electron carrier activity | NA       |
| unknown | NA | NA | NA | SJC_S017584 | NA | NA | NA | Sjp_0124450.1 | NA                        | NA       |
| unknown | NA | NA | NA | SJC_S017592 | NA | NA | NA | Sjp_0124460.1 | NA                        | NA       |
| unknown | NA | NA | NA | SJC_S017597 | NA | NA | NA | Sjp_0124470.1 | NA                        | NA       |
| unknown | NA | NA | NA | SJC_S017601 | NA | NA | NA | Sjp_0124490.1 | NA                        | NA       |
| unknown | NA | NA | NA | SJC_S017607 | NA | NA | NA | Sjp_0124500.1 | catalytic activity        | 0.035844 |
| unknown | NA | NA | NA | SJC_S017625 | NA | NA | NA | Sjp_0124510.1 | electron carrier activity | NA       |
| unknown | NA | NA | NA | SJC_S017635 | NA | NA | NA | Sjp_0124530.1 | biological regulation     | 0.76396  |
| unknown | NA | NA | NA | SJC_S017650 | NA | NA | NA | Sjp_0124540.1 | transporter activity      | 0.782    |
| unknown | NA | NA | NA | SJC_S017651 | NA | NA | NA | Sjp_0124550.1 | NA                        | NA       |
| unknown | NA | NA | NA | SJC_S017658 | NA | NA | NA | Sjp_0124560.1 | catalytic activity        | 0.035844 |
| unknown | NA | NA | NA | SJC_S017667 | NA | NA | NA | Sjp_0124570.1 | NA                        | NA       |
| unknown | NA | NA | NA | SJC_S017683 | NA | NA | NA | Sjp_0124590.1 | NA                        | NA       |
| unknown | NA | NA | NA | SJC_S017688 | NA | NA | NA | Sjp_0124600.1 | electron carrier activity | NA       |
| unknown | NA | NA | NA | SJC_S017694 | NA | NA | NA | Sjp_0124610.1 | NA                        | NA       |
| unknown | NA | NA | NA | SJC_S017694 | NA | NA | NA | Sjp_0124620.1 | NA                        | NA       |
| unknown | NA | NA | NA | SJC_S017754 | NA | NA | NA | Sjp_0124630.1 | electron carrier activity | NA       |
| unknown | NA | NA | NA | SJC_S017755 | NA | NA | NA | Sjp_0124640.1 | NA                        | NA       |
| unknown | NA | NA | NA | SJC_S017759 | NA | NA | NA | Sjp_0124650.1 | NA                        | NA       |

|         |    |    |    |             |    |    |    |               |                           |          |
|---------|----|----|----|-------------|----|----|----|---------------|---------------------------|----------|
| unknown | NA | NA | NA | SJC_S017781 | NA | NA | NA | Sjp_0124660.1 | NA                        | NA       |
| unknown | NA | NA | NA | SJC_S017798 | NA | NA | NA | Sjp_0124670.1 | NA                        | NA       |
| unknown | NA | NA | NA | SJC_S017803 | NA | NA | NA | Sjp_0124680.1 | NA                        | NA       |
| unknown | NA | NA | NA | SJC_S017840 | NA | NA | NA | Sjp_0124700.1 | catalytic activity        | 0.035844 |
| unknown | NA | NA | NA | SJC_S017844 | NA | NA | NA | Sjp_0124710.1 | NA                        | NA       |
| unknown | NA | NA | NA | SJC_S017855 | NA | NA | NA | Sjp_0124720.1 | NA                        | NA       |
| unknown | NA | NA | NA | SJC_S017885 | NA | NA | NA | Sjp_0124730.1 | NA                        | NA       |
| unknown | NA | NA | NA | SJC_S017947 | NA | NA | NA | Sjp_0124760.1 | NA                        | NA       |
| unknown | NA | NA | NA | SJC_S017953 | NA | NA | NA | Sjp_0124770.1 | catalytic activity        | 0.035844 |
| unknown | NA | NA | NA | SJC_S017985 | NA | NA | NA | Sjp_0124780.1 | NA                        | NA       |
| unknown | NA | NA | NA | SJC_S017998 | NA | NA | NA | Sjp_0124800.1 | catalytic activity        | 0.035844 |
| unknown | NA | NA | NA | SJC_S018035 | NA | NA | NA | Sjp_0124820.1 | biological regulation     | 0.76396  |
| unknown | NA | NA | NA | SJC_S018088 | NA | NA | NA | Sjp_0124840.1 | NA                        | NA       |
| unknown | NA | NA | NA | SJC_S018116 | NA | NA | NA | Sjp_0124850.1 | NA                        | NA       |
| unknown | NA | NA | NA | SJC_S018129 | NA | NA | NA | Sjp_0124860.1 | NA                        | NA       |
| unknown | NA | NA | NA | SJC_S018132 | NA | NA | NA | Sjp_0124870.1 | NA                        | NA       |
| unknown | NA | NA | NA | SJC_S018159 | NA | NA | NA | Sjp_0124890.1 | NA                        | NA       |
| unknown | NA | NA | NA | SJC_S018231 | NA | NA | NA | Sjp_0124970.1 | NA                        | NA       |
| unknown | NA | NA | NA | SJC_S018237 | NA | NA | NA | Sjp_0124980.1 | NA                        | NA       |
| unknown | NA | NA | NA | SJC_S018239 | NA | NA | NA | Sjp_0124990.1 | NA                        | NA       |
| unknown | NA | NA | NA | SJC_S018261 | NA | NA | NA | Sjp_0125010.1 | NA                        | NA       |
| unknown | NA | NA | NA | SJC_S018273 | NA | NA | NA | Sjp_0125020.1 | cell part                 | 0.009037 |
| unknown | NA | NA | NA | SJC_S018274 | NA | NA | NA | Sjp_0125030.1 | NA                        | NA       |
| unknown | NA | NA | NA | SJC_S018370 | NA | NA | NA | Sjp_0125070.1 | catalytic activity        | 0.035844 |
| unknown | NA | NA | NA | SJC_S018390 | NA | NA | NA | Sjp_0125080.1 | virion part               | NA       |
| unknown | NA | NA | NA | SJC_S018445 | NA | NA | NA | Sjp_0125100.1 | NA                        | NA       |
| unknown | NA | NA | NA | SJC_S018448 | NA | NA | NA | Sjp_0125110.1 | catalytic activity        | 0.035844 |
| unknown | NA | NA | NA | SJC_S018521 | NA | NA | NA | Sjp_0125150.1 | binding                   | 0.052762 |
| unknown | NA | NA | NA | SJC_S018556 | NA | NA | NA | Sjp_0125170.1 | electron carrier activity | NA       |
| unknown | NA | NA | NA | SJC_S018581 | NA | NA | NA | Sjp_0125180.1 | electron carrier activity | NA       |
| unknown | NA | NA | NA | SJC_S018724 | NA | NA | NA | Sjp_0125210.1 | NA                        | NA       |

|         |    |    |    |             |    |    |    |               |                           |          |
|---------|----|----|----|-------------|----|----|----|---------------|---------------------------|----------|
| unknown | NA | NA | NA | SJC_S018736 | NA | NA | NA | Sjp_0125220.1 | NA                        | NA       |
| unknown | NA | NA | NA | SJC_S018768 | NA | NA | NA | Sjp_0125230.1 | NA                        | NA       |
| unknown | NA | NA | NA | SJC_S018782 | NA | NA | NA | Sjp_0125240.1 | NA                        | NA       |
| unknown | NA | NA | NA | SJC_S018790 | NA | NA | NA | Sjp_0125250.1 | NA                        | NA       |
| unknown | NA | NA | NA | SJC_S018861 | NA | NA | NA | Sjp_0125280.1 | NA                        | NA       |
| unknown | NA | NA | NA | SJC_S018886 | NA | NA | NA | Sjp_0125290.1 | NA                        | NA       |
| unknown | NA | NA | NA | SJC_S018923 | NA | NA | NA | Sjp_0125300.1 | catalytic activity        | 0.035844 |
| unknown | NA | NA | NA | SJC_S019036 | NA | NA | NA | Sjp_0125340.1 | NA                        | NA       |
| unknown | NA | NA | NA | SJC_S019052 | NA | NA | NA | Sjp_0125360.1 | NA                        | NA       |
| unknown | NA | NA | NA | SJC_S019054 | NA | NA | NA | Sjp_0125370.1 | NA                        | NA       |
| unknown | NA | NA | NA | SJC_S019082 | NA | NA | NA | Sjp_0125380.1 | NA                        | NA       |
| unknown | NA | NA | NA | SJC_S019271 | NA | NA | NA | Sjp_0125420.1 | NA                        | NA       |
| unknown | NA | NA | NA | SJC_S019282 | NA | NA | NA | Sjp_0125430.1 | NA                        | NA       |
| unknown | NA | NA | NA | SJC_S019293 | NA | NA | NA | Sjp_0125440.1 | NA                        | NA       |
| unknown | NA | NA | NA | SJC_S019299 | NA | NA | NA | Sjp_0125450.1 | NA                        | NA       |
| unknown | NA | NA | NA | SJC_S019353 | NA | NA | NA | Sjp_0125470.1 | NA                        | NA       |
| unknown | NA | NA | NA | SJC_S019419 | NA | NA | NA | Sjp_0125500.1 | NA                        | NA       |
| unknown | NA | NA | NA | SJC_S019426 | NA | NA | NA | Sjp_0125510.1 | electron carrier activity | NA       |
| unknown | NA | NA | NA | SJC_S019453 | NA | NA | NA | Sjp_0125520.1 | NA                        | NA       |
| unknown | NA | NA | NA | SJC_S019478 | NA | NA | NA | Sjp_0125530.1 | electron carrier activity | NA       |
| unknown | NA | NA | NA | SJC_S019482 | NA | NA | NA | Sjp_0125540.1 | NA                        | NA       |
| unknown | NA | NA | NA | SJC_S019509 | NA | NA | NA | Sjp_0125570.1 | NA                        | NA       |
| unknown | NA | NA | NA | SJC_S019514 | NA | NA | NA | Sjp_0125580.1 | NA                        | NA       |
| unknown | NA | NA | NA | SJC_S019598 | NA | NA | NA | Sjp_0125600.1 | NA                        | NA       |
| unknown | NA | NA | NA | SJC_S019610 | NA | NA | NA | Sjp_0125610.1 | NA                        | NA       |
| unknown | NA | NA | NA | SJC_S019626 | NA | NA | NA | Sjp_0125630.1 | NA                        | NA       |
| unknown | NA | NA | NA | SJC_S019660 | NA | NA | NA | Sjp_0125650.1 | NA                        | NA       |
| unknown | NA | NA | NA | SJC_S019743 | NA | NA | NA | Sjp_0125700.1 | cellular process          | 0.63852  |
| unknown | NA | NA | NA | SJC_S019766 | NA | NA | NA | Sjp_0125710.1 | NA                        | NA       |
| unknown | NA | NA | NA | SJC_S019804 | NA | NA | NA | Sjp_0125740.1 | NA                        | NA       |
| unknown | NA | NA | NA | SJC_S019815 | NA | NA | NA | Sjp_0125760.1 | NA                        | NA       |
| unknown | NA | NA | NA | SJC_S019849 | NA | NA | NA | Sjp_0125770.1 | NA                        | NA       |

|         |    |    |    |             |    |    |    |               |                           |          |
|---------|----|----|----|-------------|----|----|----|---------------|---------------------------|----------|
| unknown | NA | NA | NA | SJC_S019856 | NA | NA | NA | Sjp_0125790.1 | electron carrier activity | NA       |
| unknown | NA | NA | NA | SJC_S019861 | NA | NA | NA | Sjp_0125800.1 | NA                        | NA       |
| unknown | NA | NA | NA | SJC_S019899 | NA | NA | NA | Sjp_0125830.1 | catalytic activity        | 0.035844 |
| unknown | NA | NA | NA | SJC_S019927 | NA | NA | NA | Sjp_0125840.1 | NA                        | NA       |
| unknown | NA | NA | NA | SJC_S019949 | NA | NA | NA | Sjp_0125850.1 | catalytic activity        | 0.035844 |
| unknown | NA | NA | NA | SJC_S019957 | NA | NA | NA | Sjp_0125860.1 | NA                        | NA       |
| unknown | NA | NA | NA | SJC_S019966 | NA | NA | NA | Sjp_0125870.1 | electron carrier activity | NA       |
| unknown | NA | NA | NA | SJC_S020004 | NA | NA | NA | Sjp_0125910.1 | NA                        | NA       |
| unknown | NA | NA | NA | SJC_S020017 | NA | NA | NA | Sjp_0125920.1 | NA                        | NA       |
| unknown | NA | NA | NA | SJC_S020096 | NA | NA | NA | Sjp_0125980.1 | NA                        | NA       |
| unknown | NA | NA | NA | SJC_S020121 | NA | NA | NA | Sjp_0126000.1 | NA                        | NA       |
| unknown | NA | NA | NA | SJC_S020133 | NA | NA | NA | Sjp_0126020.1 | NA                        | NA       |
| unknown | NA | NA | NA | SJC_S020160 | NA | NA | NA | Sjp_0126050.1 | catalytic activity        | 0.035844 |
| unknown | NA | NA | NA | SJC_S020214 | NA | NA | NA | Sjp_0126060.1 | electron carrier activity | NA       |
| unknown | NA | NA | NA | SJC_S020222 | NA | NA | NA | Sjp_0126080.1 | electron carrier activity | NA       |
| unknown | NA | NA | NA | SJC_S020240 | NA | NA | NA | Sjp_0126130.1 | NA                        | NA       |
| unknown | NA | NA | NA | SJC_S020259 | NA | NA | NA | Sjp_0126150.1 | NA                        | NA       |
| unknown | NA | NA | NA | SJC_S020302 | NA | NA | NA | Sjp_0126200.1 | NA                        | NA       |
| unknown | NA | NA | NA | SJC_S020311 | NA | NA | NA | Sjp_0126220.1 | NA                        | NA       |
| unknown | NA | NA | NA | SJC_S020348 | NA | NA | NA | Sjp_0126280.1 | NA                        | NA       |
| unknown | NA | NA | NA | SJC_S020357 | NA | NA | NA | Sjp_0126290.1 | electron carrier activity | NA       |
| unknown | NA | NA | NA | SJC_S020367 | NA | NA | NA | Sjp_0126300.1 | NA                        | NA       |
| unknown | NA | NA | NA | SJC_S020374 | NA | NA | NA | Sjp_0126320.1 | NA                        | NA       |
| unknown | NA | NA | NA | SJC_S020433 | NA | NA | NA | Sjp_0126330.1 | catalytic activity        | 0.035844 |
| unknown | NA | NA | NA | SJC_S020495 | NA | NA | NA | Sjp_0126370.1 | electron carrier activity | NA       |
| unknown | NA | NA | NA | SJC_S020497 | NA | NA | NA | Sjp_0126380.1 | catalytic activity        | 0.035844 |
| unknown | NA | NA | NA | SJC_S020500 | NA | NA | NA | Sjp_0126390.1 | catalytic activity        | 0.035844 |
| unknown | NA | NA | NA | SJC_S020513 | NA | NA | NA | Sjp_0126410.1 | NA                        | NA       |

|         |    |    |    |             |    |    |    |               |                           |          |
|---------|----|----|----|-------------|----|----|----|---------------|---------------------------|----------|
| unknown | NA | NA | NA | SJC_S020523 | NA | NA | NA | Sjp_0126420.1 | NA                        | NA       |
| unknown | NA | NA | NA | SJC_S020531 | NA | NA | NA | Sjp_0126430.1 | NA                        | NA       |
| unknown | NA | NA | NA | SJC_S020573 | NA | NA | NA | Sjp_0126470.1 | NA                        | NA       |
| unknown | NA | NA | NA | SJC_S020607 | NA | NA | NA | Sjp_0126500.1 | NA                        | NA       |
| unknown | NA | NA | NA | SJC_S020617 | NA | NA | NA | Sjp_0126510.1 | NA                        | NA       |
| unknown | NA | NA | NA | SJC_S020651 | NA | NA | NA | Sjp_0126520.1 | catalytic activity        | 0.035844 |
| unknown | NA | NA | NA | SJC_S020652 | NA | NA | NA | Sjp_0126530.1 | NA                        | NA       |
| unknown | NA | NA | NA | SJC_S020686 | NA | NA | NA | Sjp_0126570.1 | electron carrier activity | NA       |
| unknown | NA | NA | NA | SJC_S020693 | NA | NA | NA | Sjp_0126580.1 | electron carrier activity | NA       |
| unknown | NA | NA | NA | SJC_S020709 | NA | NA | NA | Sjp_0126600.1 | catalytic activity        | 0.035844 |
| unknown | NA | NA | NA | SJC_S020728 | NA | NA | NA | Sjp_0126620.1 | NA                        | NA       |
| unknown | NA | NA | NA | SJC_S020735 | NA | NA | NA | Sjp_0126630.1 | cellular process          | 0.63852  |
| unknown | NA | NA | NA | SJC_S020742 | NA | NA | NA | Sjp_0126640.1 | NA                        | NA       |
| unknown | NA | NA | NA | SJC_S020746 | NA | NA | NA | Sjp_0126650.1 | metabolic process         | 0.41934  |
| unknown | NA | NA | NA | SJC_S020781 | NA | NA | NA | Sjp_0126680.1 | NA                        | NA       |
| unknown | NA | NA | NA | SJC_S020799 | NA | NA | NA | Sjp_0126700.1 | NA                        | NA       |
| unknown | NA | NA | NA | SJC_S020819 | NA | NA | NA | Sjp_0126720.1 | NA                        | NA       |
| unknown | NA | NA | NA | SJC_S020863 | NA | NA | NA | Sjp_0126750.1 | NA                        | NA       |
| unknown | NA | NA | NA | SJC_S020898 | NA | NA | NA | Sjp_0126760.1 | cellular process          | 0.63852  |
| unknown | NA | NA | NA | SJC_S020918 | NA | NA | NA | Sjp_0126800.1 | catalytic activity        | 0.035844 |
| unknown | NA | NA | NA | SJC_S020919 | NA | NA | NA | Sjp_0126810.1 | electron carrier activity | NA       |
| unknown | NA | NA | NA | SJC_S020935 | NA | NA | NA | Sjp_0126820.1 | NA                        | NA       |
| unknown | NA | NA | NA | SJC_S021095 | NA | NA | NA | Sjp_0126930.1 | NA                        | NA       |
| unknown | NA | NA | NA | SJC_S021117 | NA | NA | NA | Sjp_0126950.1 | NA                        | NA       |
| unknown | NA | NA | NA | SJC_S021148 | NA | NA | NA | Sjp_0126970.1 | NA                        | NA       |
| unknown | NA | NA | NA | SJC_S021150 | NA | NA | NA | Sjp_0126980.1 | NA                        | NA       |
| unknown | NA | NA | NA | SJC_S021188 | NA | NA | NA | Sjp_0127020.1 | catalytic activity        | 0.035844 |
| unknown | NA | NA | NA | SJC_S021260 | NA | NA | NA | Sjp_0127050.1 | catalytic activity        | 0.035844 |
| unknown | NA | NA | NA | SJC_S021260 | NA | NA | NA | Sjp_0127060.1 | NA                        | NA       |
| unknown | NA | NA | NA | SJC_S021288 | NA | NA | NA | Sjp_0127090.1 | NA                        | NA       |

|         |    |    |    |             |    |    |    |               |                                                    |          |
|---------|----|----|----|-------------|----|----|----|---------------|----------------------------------------------------|----------|
| unknown | NA | NA | NA | SJC_S021289 | NA | NA | NA | Sjp_0127100.1 | electron carrier activity                          | NA       |
| unknown | NA | NA | NA | SJC_S021329 | NA | NA | NA | Sjp_0127130.1 | NA                                                 | NA       |
| unknown | NA | NA | NA | SJC_S021359 | NA | NA | NA | Sjp_0127140.1 | NA                                                 | NA       |
| unknown | NA | NA | NA | SJC_S021439 | NA | NA | NA | Sjp_0127200.1 | biological regulation                              | 0.76396  |
| unknown | NA | NA | NA | SJC_S021504 | NA | NA | NA | Sjp_0127270.1 | NA                                                 | NA       |
| unknown | NA | NA | NA | SJC_S021551 | NA | NA | NA | Sjp_0127300.1 | NA                                                 | NA       |
| unknown | NA | NA | NA | SJC_S021595 | NA | NA | NA | Sjp_0127340.1 | catalytic activity                                 | 0.035844 |
| unknown | NA | NA | NA | SJC_S021615 | NA | NA | NA | Sjp_0127360.1 | electron carrier activity                          | NA       |
| unknown | NA | NA | NA | SJC_S021622 | NA | NA | NA | Sjp_0127380.1 | nucleic acid binding transcription factor activity | NA       |
| unknown | NA | NA | NA | SJC_S021624 | NA | NA | NA | Sjp_0127390.1 | NA                                                 | NA       |
| unknown | NA | NA | NA | SJC_S021630 | NA | NA | NA | Sjp_0127400.1 | electron carrier activity                          | NA       |
| unknown | NA | NA | NA | SJC_S021633 | NA | NA | NA | Sjp_0127420.1 | binding                                            | 0.052762 |
| unknown | NA | NA | NA | SJC_S021730 | NA | NA | NA | Sjp_0127480.1 | NA                                                 | NA       |
| unknown | NA | NA | NA | SJC_S021776 | NA | NA | NA | Sjp_0127500.1 | NA                                                 | NA       |
| unknown | NA | NA | NA | SJC_S021793 | NA | NA | NA | Sjp_0127530.1 | NA                                                 | NA       |
| unknown | NA | NA | NA | SJC_S021891 | NA | NA | NA | Sjp_0127560.1 | biological regulation                              | 0.76396  |
| unknown | NA | NA | NA | SJC_S021918 | NA | NA | NA | Sjp_0127570.1 | binding                                            | 0.052762 |
| unknown | NA | NA | NA | SJC_S022088 | NA | NA | NA | Sjp_0127660.1 | catalytic activity                                 | 0.035844 |
| unknown | NA | NA | NA | SJC_S022092 | NA | NA | NA | Sjp_0127670.1 | NA                                                 | NA       |
| unknown | NA | NA | NA | SJC_S022119 | NA | NA | NA | Sjp_0127690.1 | NA                                                 | NA       |
| unknown | NA | NA | NA | SJC_S022138 | NA | NA | NA | Sjp_0127700.1 | NA                                                 | NA       |
| unknown | NA | NA | NA | SJC_S022188 | NA | NA | NA | Sjp_0127750.1 | NA                                                 | NA       |
| unknown | NA | NA | NA | SJC_S022346 | NA | NA | NA | Sjp_0127840.1 | NA                                                 | NA       |
| unknown | NA | NA | NA | SJC_S022371 | NA | NA | NA | Sjp_0127850.1 | NA                                                 | NA       |
| unknown | NA | NA | NA | SJC_S022451 | NA | NA | NA | Sjp_0127860.1 | establishment of localization                      | NA       |

|         |    |    |    |             |    |    |    |               |                               |          |
|---------|----|----|----|-------------|----|----|----|---------------|-------------------------------|----------|
| unknown | NA | NA | NA | SJC_S022458 | NA | NA | NA | Sjp_0127870.1 | metabolic process             | 0.41934  |
| unknown | NA | NA | NA | SJC_S022467 | NA | NA | NA | Sjp_0127880.1 | binding                       | 0.052762 |
| unknown | NA | NA | NA | SJC_S022472 | NA | NA | NA | Sjp_0127890.1 | NA                            | NA       |
| unknown | NA | NA | NA | SJC_S022508 | NA | NA | NA | Sjp_0127910.1 | NA                            | NA       |
| unknown | NA | NA | NA | SJC_S022515 | NA | NA | NA | Sjp_0127920.1 | NA                            | NA       |
| unknown | NA | NA | NA | SJC_S022519 | NA | NA | NA | Sjp_0127930.1 | NA                            | NA       |
| unknown | NA | NA | NA | SJC_S022529 | NA | NA | NA | Sjp_0127940.1 | cell part                     | 0.009037 |
| unknown | NA | NA | NA | SJC_S022563 | NA | NA | NA | Sjp_0127960.1 | biological regulation         | 0.76396  |
| unknown | NA | NA | NA | SJC_S022578 | NA | NA | NA | Sjp_0127990.1 | NA                            | NA       |
| unknown | NA | NA | NA | SJC_S022593 | NA | NA | NA | Sjp_0128000.1 | NA                            | NA       |
| unknown | NA | NA | NA | SJC_S022646 | NA | NA | NA | Sjp_0128010.1 | NA                            | NA       |
| unknown | NA | NA | NA | SJC_S022690 | NA | NA | NA | Sjp_0128030.1 | NA                            | NA       |
| unknown | NA | NA | NA | SJC_S022692 | NA | NA | NA | Sjp_0128040.1 | NA                            | NA       |
| unknown | NA | NA | NA | SJC_S022712 | NA | NA | NA | Sjp_0128060.1 | cell part                     | 0.009037 |
| unknown | NA | NA | NA | SJC_S022770 | NA | NA | NA | Sjp_0128080.1 | NA                            | NA       |
| unknown | NA | NA | NA | SJC_S022790 | NA | NA | NA | Sjp_0128090.1 | NA                            | NA       |
| unknown | NA | NA | NA | SJC_S022794 | NA | NA | NA | Sjp_0128100.1 | cell part                     | 0.009037 |
| unknown | NA | NA | NA | SJC_S022867 | NA | NA | NA | Sjp_0128150.1 | NA                            | NA       |
| unknown | NA | NA | NA | SJC_S022897 | NA | NA | NA | Sjp_0128170.1 | cell part                     | 0.009037 |
| unknown | NA | NA | NA | SJC_S022941 | NA | NA | NA | Sjp_0128180.1 | NA                            | NA       |
| unknown | NA | NA | NA | SJC_S023001 | NA | NA | NA | Sjp_0128200.1 | establishment of localization | NA       |
| unknown | NA | NA | NA | SJC_S023031 | NA | NA | NA | Sjp_0128210.1 | NA                            | NA       |
| unknown | NA | NA | NA | SJC_S023036 | NA | NA | NA | Sjp_0128220.1 | biological regulation         | 0.76396  |
| unknown | NA | NA | NA | SJC_S023037 | NA | NA | NA | Sjp_0128230.1 | metabolic process             | 0.41934  |
| unknown | NA | NA | NA | SJC_S023041 | NA | NA | NA | Sjp_0128240.1 | catalytic activity            | 0.035844 |
| unknown | NA | NA | NA | SJC_S023065 | NA | NA | NA | Sjp_0128260.1 | cell part                     | 0.009037 |
| unknown | NA | NA | NA | SJC_S023084 | NA | NA | NA | Sjp_0128280.1 | NA                            | NA       |
| unknown | NA | NA | NA | SJC_S023086 | NA | NA | NA | Sjp_0128290.1 | enzyme regulator              | 0.1755   |



|         |    |    |    |             |    |    |    |               |                           |          |
|---------|----|----|----|-------------|----|----|----|---------------|---------------------------|----------|
|         |    |    |    |             |    |    |    |               | activity                  |          |
| unknown | NA | NA | NA | SJC_S023096 | NA | NA | NA | Sjp_0128300.1 | NA                        | NA       |
| unknown | NA | NA | NA | SJC_S023141 | NA | NA | NA | Sjp_0128310.1 | catalytic activity        | 0.035844 |
| unknown | NA | NA | NA | SJC_S023153 | NA | NA | NA | Sjp_0128320.1 | NA                        | NA       |
| unknown | NA | NA | NA | SJC_S023163 | NA | NA | NA | Sjp_0128330.1 | catalytic activity        | 0.035844 |
| unknown | NA | NA | NA | SJC_S023190 | NA | NA | NA | Sjp_0128350.1 | NA                        | NA       |
| unknown | NA | NA | NA | SJC_S023208 | NA | NA | NA | Sjp_0128360.1 | cell part                 | 0.009037 |
| unknown | NA | NA | NA | SJC_S023213 | NA | NA | NA | Sjp_0128370.1 | cell part                 | 0.009037 |
| unknown | NA | NA | NA | SJC_S023218 | NA | NA | NA | Sjp_0128390.1 | NA                        | NA       |
| unknown | NA | NA | NA | SJC_S023269 | NA | NA | NA | Sjp_0128430.1 | NA                        | NA       |
| unknown | NA | NA | NA | SJC_S023277 | NA | NA | NA | Sjp_0128440.1 | NA                        | NA       |
| unknown | NA | NA | NA | SJC_S023356 | NA | NA | NA | Sjp_0128450.1 | NA                        | NA       |
| unknown | NA | NA | NA | SJC_S023361 | NA | NA | NA | Sjp_0128460.1 | developmental process     | NA       |
| unknown | NA | NA | NA | SJC_S023362 | NA | NA | NA | Sjp_0128470.1 | metabolic process         | 0.41934  |
| unknown | NA | NA | NA | SJC_S023414 | NA | NA | NA | Sjp_0128480.1 | NA                        | NA       |
| unknown | NA | NA | NA | SJC_S023421 | NA | NA | NA | Sjp_0128490.1 | NA                        | NA       |
| unknown | NA | NA | NA | SJC_S023432 | NA | NA | NA | Sjp_0128500.1 | NA                        | NA       |
| unknown | NA | NA | NA | SJC_S023444 | NA | NA | NA | Sjp_0128510.1 | binding                   | 0.052762 |
| unknown | NA | NA | NA | SJC_S023449 | NA | NA | NA | Sjp_0128520.1 | cell part                 | 0.009037 |
| unknown | NA | NA | NA | SJC_S023457 | NA | NA | NA | Sjp_0128540.1 | NA                        | NA       |
| unknown | NA | NA | NA | SJC_S023459 | NA | NA | NA | Sjp_0128550.1 | binding                   | 0.052762 |
| unknown | NA | NA | NA | SJC_S023483 | NA | NA | NA | Sjp_0128570.1 | NA                        | NA       |
| unknown | NA | NA | NA | SJC_S023485 | NA | NA | NA | Sjp_0128580.1 | NA                        | NA       |
| unknown | NA | NA | NA | SJC_S023499 | NA | NA | NA | Sjp_0128590.1 | NA                        | NA       |
| unknown | NA | NA | NA | SJC_S023503 | NA | NA | NA | Sjp_0128600.1 | catalytic activity        | 0.035844 |
| unknown | NA | NA | NA | SJC_S023503 | NA | NA | NA | Sjp_0128610.1 | catalytic activity        | 0.035844 |
| unknown | NA | NA | NA | SJC_S023522 | NA | NA | NA | Sjp_0128640.1 | NA                        | NA       |
| unknown | NA | NA | NA | SJC_S023545 | NA | NA | NA | Sjp_0128650.1 | NA                        | NA       |
| unknown | NA | NA | NA | SJC_S023574 | NA | NA | NA | Sjp_0128660.1 | electron carrier activity | NA       |
| unknown | NA | NA | NA | SJC_S023575 | NA | NA | NA | Sjp_0128670.1 | NA                        | NA       |
| unknown | NA | NA | NA | SJC_S023578 | NA | NA | NA | Sjp_0128680.1 | NA                        | NA       |

|         |    |    |    |             |    |    |    |               |                                  |          |
|---------|----|----|----|-------------|----|----|----|---------------|----------------------------------|----------|
| unknown | NA | NA | NA | SJC_S023579 | NA | NA | NA | Sjp_0128690.1 | NA                               | NA       |
| unknown | NA | NA | NA | SJC_S023584 | NA | NA | NA | Sjp_0128700.1 | catalytic activity               | 0.035844 |
| unknown | NA | NA | NA | SJC_S023587 | NA | NA | NA | Sjp_0128710.1 | molecular transducer activity    | 0.50162  |
| unknown | NA | NA | NA | SJC_S023588 | NA | NA | NA | Sjp_0128720.1 | NA                               | NA       |
| unknown | NA | NA | NA | SJC_S023589 | NA | NA | NA | Sjp_0128730.1 | transcription regulator activity | NA       |
| unknown | NA | NA | NA | SJC_S023591 | NA | NA | NA | Sjp_0128740.1 | transporter activity             | 0.782    |
| unknown | NA | NA | NA | SJC_S023601 | NA | NA | NA | Sjp_0128760.1 | NA                               | NA       |
| unknown | NA | NA | NA | SJC_S023607 | NA | NA | NA | Sjp_0128770.1 | NA                               | NA       |
| unknown | NA | NA | NA | SJC_S023614 | NA | NA | NA | Sjp_0128780.1 | NA                               | NA       |
| unknown | NA | NA | NA | SJC_S023615 | NA | NA | NA | Sjp_0128790.1 | electron carrier activity        | NA       |
| unknown | NA | NA | NA | SJC_S023615 | NA | NA | NA | Sjp_0128800.1 | NA                               | NA       |
| unknown | NA | NA | NA | SJC_S023617 | NA | NA | NA | Sjp_0128810.1 | response to stimulus             | NA       |
| unknown | NA | NA | NA | SJC_S023617 | NA | NA | NA | Sjp_0128820.1 | NA                               | NA       |
| unknown | NA | NA | NA | SJC_S023623 | NA | NA | NA | Sjp_0128830.1 | NA                               | NA       |
| unknown | NA | NA | NA | SJC_S023624 | NA | NA | NA | Sjp_0128840.1 | NA                               | NA       |
| unknown | NA | NA | NA | SJC_S023652 | NA | NA | NA | Sjp_0128880.1 | NA                               | NA       |
| unknown | NA | NA | NA | SJC_S023664 | NA | NA | NA | Sjp_0128890.1 | electron carrier activity        | NA       |
| unknown | NA | NA | NA | SJC_S023665 | NA | NA | NA | Sjp_0128900.1 | NA                               | NA       |
| unknown | NA | NA | NA | SJC_S023674 | NA | NA | NA | Sjp_0128910.1 | NA                               | NA       |
| unknown | NA | NA | NA | SJC_S023726 | NA | NA | NA | Sjp_0128920.1 | catalytic activity               | 0.035844 |
| unknown | NA | NA | NA | SJC_S023734 | NA | NA | NA | Sjp_0128940.1 | NA                               | NA       |
| unknown | NA | NA | NA | SJC_S023735 | NA | NA | NA | Sjp_0128950.1 | NA                               | NA       |
| unknown | NA | NA | NA | SJC_S023737 | NA | NA | NA | Sjp_0128960.1 | NA                               | NA       |
| unknown | NA | NA | NA | SJC_S023744 | NA | NA | NA | Sjp_0128970.1 | NA                               | NA       |
| unknown | NA | NA | NA | SJC_S023746 | NA | NA | NA | Sjp_0128980.1 | NA                               | NA       |
| unknown | NA | NA | NA | SJC_S023748 | NA | NA | NA | Sjp_0128990.1 | binding                          | 0.052762 |

|         |    |    |    |             |    |    |    |               |                       |          |
|---------|----|----|----|-------------|----|----|----|---------------|-----------------------|----------|
| unknown | NA | NA | NA | SJC_S023751 | NA | NA | NA | Sjp_0129000.1 | NA                    | NA       |
| unknown | NA | NA | NA | SJC_S023756 | NA | NA | NA | Sjp_0129010.1 | NA                    | NA       |
| unknown | NA | NA | NA | SJC_S023765 | NA | NA | NA | Sjp_0129020.1 | biological regulation | 0.76396  |
| unknown | NA | NA | NA | SJC_S023768 | NA | NA | NA | Sjp_0129030.1 | NA                    | NA       |
| unknown | NA | NA | NA | SJC_S023770 | NA | NA | NA | Sjp_0129040.1 | NA                    | NA       |
| unknown | NA | NA | NA | SJC_S023779 | NA | NA | NA | Sjp_0129050.1 | binding               | 0.052762 |
| unknown | NA | NA | NA | SJC_S023781 | NA | NA | NA | Sjp_0129060.1 | NA                    | NA       |
| unknown | NA | NA | NA | SJC_S023793 | NA | NA | NA | Sjp_0129070.1 | NA                    | NA       |
| unknown | NA | NA | NA | SJC_S023794 | NA | NA | NA | Sjp_0129080.1 | NA                    | NA       |
| unknown | NA | NA | NA | SJC_S023798 | NA | NA | NA | Sjp_0129100.1 | cellular process      | 0.63852  |
| unknown | NA | NA | NA | SJC_S023806 | NA | NA | NA | Sjp_0129110.1 | NA                    | NA       |
| unknown | NA | NA | NA | SJC_S023813 | NA | NA | NA | Sjp_0129120.1 | NA                    | NA       |
| unknown | NA | NA | NA | SJC_S023837 | NA | NA | NA | Sjp_0129130.1 | NA                    | NA       |
| unknown | NA | NA | NA | SJC_S023842 | NA | NA | NA | Sjp_0129140.1 | NA                    | NA       |
| unknown | NA | NA | NA | SJC_S023843 | NA | NA | NA | Sjp_0129150.1 | NA                    | NA       |
| unknown | NA | NA | NA | SJC_S023866 | NA | NA | NA | Sjp_0129160.1 | NA                    | NA       |
| unknown | NA | NA | NA | SJC_S023879 | NA | NA | NA | Sjp_0129170.1 | NA                    | NA       |
| unknown | NA | NA | NA | SJC_S023903 | NA | NA | NA | Sjp_0129180.1 | NA                    | NA       |
| unknown | NA | NA | NA | SJC_S023920 | NA | NA | NA | Sjp_0129190.1 | NA                    | NA       |
| unknown | NA | NA | NA | SJC_S023935 | NA | NA | NA | Sjp_0129210.1 | NA                    | NA       |
| unknown | NA | NA | NA | SJC_S023938 | NA | NA | NA | Sjp_0129220.1 | developmental process | NA       |
| unknown | NA | NA | NA | SJC_S023965 | NA | NA | NA | Sjp_0129230.1 | NA                    | NA       |
| unknown | NA | NA | NA | SJC_S024029 | NA | NA | NA | Sjp_0129240.1 | catalytic activity    | 0.035844 |
| unknown | NA | NA | NA | SJC_S024039 | NA | NA | NA | Sjp_0129250.1 | NA                    | NA       |
| unknown | NA | NA | NA | SJC_S024082 | NA | NA | NA | Sjp_0129270.1 | NA                    | NA       |
| unknown | NA | NA | NA | SJC_S024084 | NA | NA | NA | Sjp_0129280.1 | NA                    | NA       |
| unknown | NA | NA | NA | SJC_S024089 | NA | NA | NA | Sjp_0129290.1 | NA                    | NA       |
| unknown | NA | NA | NA | SJC_S024102 | NA | NA | NA | Sjp_0129300.1 | NA                    | NA       |
| unknown | NA | NA | NA | SJC_S024131 | NA | NA | NA | Sjp_0129310.1 | NA                    | NA       |
| unknown | NA | NA | NA | SJC_S024146 | NA | NA | NA | Sjp_0129320.1 | NA                    | NA       |
| unknown | NA | NA | NA | SJC_S024185 | NA | NA | NA | Sjp_0129350.1 | NA                    | NA       |
| unknown | NA | NA | NA | SJC_S024188 | NA | NA | NA | Sjp_0129360.1 | establishment         | NA       |

|         |    |    |    |             |    |    |    |               |                               |          |
|---------|----|----|----|-------------|----|----|----|---------------|-------------------------------|----------|
|         |    |    |    |             |    |    |    |               | of localization               |          |
| unknown | NA | NA | NA | SJC_S024200 | NA | NA | NA | Sjp_0129370.1 | electron carrier activity     | NA       |
| unknown | NA | NA | NA | SJC_S024277 | NA | NA | NA | Sjp_0129410.1 | NA                            | NA       |
| unknown | NA | NA | NA | SJC_S024286 | NA | NA | NA | Sjp_0129420.1 | NA                            | NA       |
| unknown | NA | NA | NA | SJC_S024287 | NA | NA | NA | Sjp_0129430.1 | cellular process              | 0.63852  |
| unknown | NA | NA | NA | SJC_S024309 | NA | NA | NA | Sjp_0129440.1 | NA                            | NA       |
| unknown | NA | NA | NA | SJC_S024329 | NA | NA | NA | Sjp_0129450.1 | NA                            | NA       |
| unknown | NA | NA | NA | SJC_S024334 | NA | NA | NA | Sjp_0129460.1 | NA                            | NA       |
| unknown | NA | NA | NA | SJC_S024340 | NA | NA | NA | Sjp_0129470.1 | electron carrier activity     | NA       |
| unknown | NA | NA | NA | SJC_S024350 | NA | NA | NA | Sjp_0129480.1 | NA                            | NA       |
| unknown | NA | NA | NA | SJC_S024352 | NA | NA | NA | Sjp_0129490.1 | extracellular region part     | NA       |
| unknown | NA | NA | NA | SJC_S024353 | NA | NA | NA | Sjp_0129500.1 | NA                            | NA       |
| unknown | NA | NA | NA | SJC_S024402 | NA | NA | NA | Sjp_0129510.1 | NA                            | NA       |
| unknown | NA | NA | NA | SJC_S024403 | NA | NA | NA | Sjp_0129520.1 | NA                            | NA       |
| unknown | NA | NA | NA | SJC_S024414 | NA | NA | NA | Sjp_0129530.1 | NA                            | NA       |
| unknown | NA | NA | NA | SJC_S024437 | NA | NA | NA | Sjp_0129540.1 | molecular transducer activity | 0.50162  |
| unknown | NA | NA | NA | SJC_S024440 | NA | NA | NA | Sjp_0129550.1 | cellular process              | 0.63852  |
| unknown | NA | NA | NA | SJC_S024443 | NA | NA | NA | Sjp_0129560.1 | catalytic activity            | 0.035844 |
| unknown | NA | NA | NA | SJC_S024452 | NA | NA | NA | Sjp_0129570.1 | binding                       | 0.052762 |
| unknown | NA | NA | NA | SJC_S024486 | NA | NA | NA | Sjp_0129580.1 | catalytic activity            | 0.035844 |
| unknown | NA | NA | NA | SJC_S024493 | NA | NA | NA | Sjp_0129590.1 | NA                            | NA       |
| unknown | NA | NA | NA | SJC_S024512 | NA | NA | NA | Sjp_0129600.1 | catalytic activity            | 0.035844 |
| unknown | NA | NA | NA | SJC_S024514 | NA | NA | NA | Sjp_0129610.1 | binding                       | 0.052762 |
| unknown | NA | NA | NA | SJC_S024552 | NA | NA | NA | Sjp_0129620.1 | NA                            | NA       |
| unknown | NA | NA | NA | SJC_S024557 | NA | NA | NA | Sjp_0129630.1 | NA                            | NA       |
| unknown | NA | NA | NA | SJC_S024567 | NA | NA | NA | Sjp_0129640.1 | NA                            | NA       |
| unknown | NA | NA | NA | SJC_S024594 | NA | NA | NA | Sjp_0129650.1 | NA                            | NA       |
| unknown | NA | NA | NA | SJC_S024607 | NA | NA | NA | Sjp_0129660.1 | NA                            | NA       |
| unknown | NA | NA | NA | SJC_S024616 | NA | NA | NA | Sjp_0129670.1 | cell part                     | 0.009037 |

|         |    |    |    |             |    |    |    |               |                           |          |
|---------|----|----|----|-------------|----|----|----|---------------|---------------------------|----------|
| unknown | NA | NA | NA | SJC_S024618 | NA | NA | NA | Sjp_0129680.1 | NA                        | NA       |
| unknown | NA | NA | NA | SJC_S024620 | NA | NA | NA | Sjp_0129690.1 | NA                        | NA       |
| unknown | NA | NA | NA | SJC_S024621 | NA | NA | NA | Sjp_0129700.1 | NA                        | NA       |
| unknown | NA | NA | NA | SJC_S024632 | NA | NA | NA | Sjp_0129710.1 | NA                        | NA       |
| unknown | NA | NA | NA | SJC_S024662 | NA | NA | NA | Sjp_0129720.1 | NA                        | NA       |
| unknown | NA | NA | NA | SJC_S024667 | NA | NA | NA | Sjp_0129730.1 | binding                   | 0.052762 |
| unknown | NA | NA | NA | SJC_S024668 | NA | NA | NA | Sjp_0129740.1 | biological regulation     | 0.76396  |
| unknown | NA | NA | NA | SJC_S024687 | NA | NA | NA | Sjp_0129750.1 | NA                        | NA       |
| unknown | NA | NA | NA | SJC_S024699 | NA | NA | NA | Sjp_0129760.1 | NA                        | NA       |
| unknown | NA | NA | NA | SJC_S024706 | NA | NA | NA | Sjp_0129770.1 | electron carrier activity | NA       |
| unknown | NA | NA | NA | SJC_S024709 | NA | NA | NA | Sjp_0129780.1 | NA                        | NA       |
| unknown | NA | NA | NA | SJC_S024728 | NA | NA | NA | Sjp_0129800.1 | binding                   | 0.052762 |
| unknown | NA | NA | NA | SJC_S024729 | NA | NA | NA | Sjp_0129810.1 | NA                        | NA       |
| unknown | NA | NA | NA | SJC_S024759 | NA | NA | NA | Sjp_0129830.1 | NA                        | NA       |
| unknown | NA | NA | NA | SJC_S024787 | NA | NA | NA | Sjp_0129840.1 | NA                        | NA       |
| unknown | NA | NA | NA | SJC_S024791 | NA | NA | NA | Sjp_0129850.1 | NA                        | NA       |
| unknown | NA | NA | NA | SJC_S024807 | NA | NA | NA | Sjp_0129860.1 | electron carrier activity | NA       |
| unknown | NA | NA | NA | SJC_S024821 | NA | NA | NA | Sjp_0129880.1 | NA                        | NA       |
| unknown | NA | NA | NA | SJC_S024843 | NA | NA | NA | Sjp_0129900.1 | NA                        | NA       |
| unknown | NA | NA | NA | SJC_S024869 | NA | NA | NA | Sjp_0129910.1 | binding                   | 0.052762 |
| unknown | NA | NA | NA | SJC_S024870 | NA | NA | NA | Sjp_0129920.1 | enzyme regulator activity | 0.1755   |
| unknown | NA | NA | NA | SJC_S024881 | NA | NA | NA | Sjp_0129930.1 | NA                        | NA       |
| unknown | NA | NA | NA | SJC_S024950 | NA | NA | NA | Sjp_0129950.1 | NA                        | NA       |
| unknown | NA | NA | NA | SJC_S024951 | NA | NA | NA | Sjp_0129960.1 | NA                        | NA       |
| unknown | NA | NA | NA | SJC_S024952 | NA | NA | NA | Sjp_0129970.1 | catalytic activity        | 0.035844 |
| unknown | NA | NA | NA | SJC_S024955 | NA | NA | NA | Sjp_0129980.1 | NA                        | NA       |
| unknown | NA | NA | NA | SJC_S024968 | NA | NA | NA | Sjp_0129990.1 | NA                        | NA       |
| unknown | NA | NA | NA | SJC_S024974 | NA | NA | NA | Sjp_0130000.1 | NA                        | NA       |
| unknown | NA | NA | NA | SJC_S024976 | NA | NA | NA | Sjp_0130010.1 | catalytic activity        | 0.035844 |

|         |    |    |    |             |    |    |    |               |                           |          |
|---------|----|----|----|-------------|----|----|----|---------------|---------------------------|----------|
| unknown | NA | NA | NA | SJC_S024982 | NA | NA | NA | Sjp_0130020.1 | catalytic activity        | 0.035844 |
| unknown | NA | NA | NA | SJC_S024985 | NA | NA | NA | Sjp_0130030.1 | binding                   | 0.052762 |
| unknown | NA | NA | NA | SJC_S024996 | NA | NA | NA | Sjp_0130040.1 | binding                   | 0.052762 |
| unknown | NA | NA | NA | SJC_S025008 | NA | NA | NA | Sjp_0130050.1 | NA                        | NA       |
| unknown | NA | NA | NA | SJC_S025015 | NA | NA | NA | Sjp_0130060.1 | electron carrier activity | NA       |
| unknown | NA | NA | NA | SJC_S025021 | NA | NA | NA | Sjp_0130070.1 | enzyme regulator activity | 0.1755   |
| unknown | NA | NA | NA | SJC_S025037 | NA | NA | NA | Sjp_0130080.1 | binding                   | 0.052762 |
| unknown | NA | NA | NA | SJC_S025045 | NA | NA | NA | Sjp_0130090.1 | NA                        | NA       |
| unknown | NA | NA | NA | SJC_S025058 | NA | NA | NA | Sjp_0130110.1 | NA                        | NA       |
| unknown | NA | NA | NA | SJC_S025061 | NA | NA | NA | Sjp_0130120.1 | NA                        | NA       |
| unknown | NA | NA | NA | SJC_S025070 | NA | NA | NA | Sjp_0130140.1 | NA                        | NA       |
| unknown | NA | NA | NA | SJC_S025109 | NA | NA | NA | Sjp_0130150.1 | NA                        | NA       |
| unknown | NA | NA | NA | SJC_S025124 | NA | NA | NA | Sjp_0130160.1 | NA                        | NA       |
| unknown | NA | NA | NA | SJC_S025128 | NA | NA | NA | Sjp_0130170.1 | biological regulation     | 0.76396  |
| unknown | NA | NA | NA | SJC_S025132 | NA | NA | NA | Sjp_0130180.1 | binding                   | 0.052762 |
| unknown | NA | NA | NA | SJC_S025140 | NA | NA | NA | Sjp_0130200.1 | NA                        | NA       |
| unknown | NA | NA | NA | SJC_S025145 | NA | NA | NA | Sjp_0130210.1 | biological regulation     | 0.76396  |
| unknown | NA | NA | NA | SJC_S025147 | NA | NA | NA | Sjp_0130220.1 | binding                   | 0.052762 |
| unknown | NA | NA | NA | SJC_S025160 | NA | NA | NA | Sjp_0130230.1 | NA                        | NA       |
| unknown | NA | NA | NA | SJC_S025174 | NA | NA | NA | Sjp_0130240.1 | cell part                 | 0.009037 |
| unknown | NA | NA | NA | SJC_S025174 | NA | NA | NA | Sjp_0130250.1 | cell part                 | 0.009037 |
| unknown | NA | NA | NA | SJC_S025179 | NA | NA | NA | Sjp_0130260.1 | electron carrier activity | NA       |
| unknown | NA | NA | NA | SJC_S025180 | NA | NA | NA | Sjp_0130270.1 | NA                        | NA       |
| unknown | NA | NA | NA | SJC_S025184 | NA | NA | NA | Sjp_0130280.1 | NA                        | NA       |
| unknown | NA | NA | NA | SJC_S025188 | NA | NA | NA | Sjp_0130290.1 | catalytic activity        | 0.035844 |
| unknown | NA | NA | NA | SJC_S025211 | NA | NA | NA | Sjp_0130300.1 | NA                        | NA       |
| unknown | NA | NA | NA | SJC_S025215 | NA | NA | NA | Sjp_0130310.1 | NA                        | NA       |
| unknown | NA | NA | NA | SJC_S025216 | NA | NA | NA | Sjp_0130320.1 | NA                        | NA       |

|         |    |    |    |             |    |    |    |               |                      |          |
|---------|----|----|----|-------------|----|----|----|---------------|----------------------|----------|
| unknown | NA | NA | NA | SJC_S025231 | NA | NA | NA | Sjp_0130330.1 | NA                   | NA       |
| unknown | NA | NA | NA | SJC_S025232 | NA | NA | NA | Sjp_0130340.1 | NA                   | NA       |
| unknown | NA | NA | NA | SJC_S025238 | NA | NA | NA | Sjp_0130350.1 | NA                   | NA       |
| unknown | NA | NA | NA | SJC_S025240 | NA | NA | NA | Sjp_0130360.1 | NA                   | NA       |
| unknown | NA | NA | NA | SJC_S025244 | NA | NA | NA | Sjp_0130370.1 | NA                   | NA       |
| unknown | NA | NA | NA | SJC_S025245 | NA | NA | NA | Sjp_0130380.1 | NA                   | NA       |
| unknown | NA | NA | NA | SJC_S025249 | NA | NA | NA | Sjp_0130390.1 | NA                   | NA       |
| unknown | NA | NA | NA | SJC_S025266 | NA | NA | NA | Sjp_0130400.1 | NA                   | NA       |
| unknown | NA | NA | NA | SJC_S025278 | NA | NA | NA | Sjp_0130420.1 | NA                   | NA       |
| unknown | NA | NA | NA | SJC_S025281 | NA | NA | NA | Sjp_0130430.1 | response to stimulus | NA       |
| unknown | NA | NA | NA | SJC_S025282 | NA | NA | NA | Sjp_0130440.1 | binding              | 0.052762 |
| unknown | NA | NA | NA | SJC_S025289 | NA | NA | NA | Sjp_0130450.1 | NA                   | NA       |
| unknown | NA | NA | NA | SJC_S025320 | NA | NA | NA | Sjp_0130470.1 | NA                   | NA       |
| unknown | NA | NA | NA | SJC_S025328 | NA | NA | NA | Sjp_0130480.1 | NA                   | NA       |
| unknown | NA | NA | NA | SJC_S025346 | NA | NA | NA | Sjp_0130490.1 | NA                   | NA       |
| unknown | NA | NA | NA | SJC_S025354 | NA | NA | NA | Sjp_0130500.1 | NA                   | NA       |
| unknown | NA | NA | NA | SJC_S025375 | NA | NA | NA | Sjp_0130510.1 | NA                   | NA       |
| unknown | NA | NA | NA | SJC_S025376 | NA | NA | NA | Sjp_0130520.1 | NA                   | NA       |
| unknown | NA | NA | NA | SJC_S025380 | NA | NA | NA | Sjp_0130530.1 | catalytic activity   | 0.035844 |
| unknown | NA | NA | NA | SJC_S025402 | NA | NA | NA | Sjp_0130540.1 | NA                   | NA       |
| unknown | NA | NA | NA | SJC_S025412 | NA | NA | NA | Sjp_0130550.1 | NA                   | NA       |
| unknown | NA | NA | NA | SJC_S025422 | NA | NA | NA | Sjp_0130560.1 | NA                   | NA       |
| unknown | NA | NA | NA | SJC_S025435 | NA | NA | NA | Sjp_0130570.1 | binding              | 0.052762 |
| unknown | NA | NA | NA | SJC_S025436 | NA | NA | NA | Sjp_0130580.1 | NA                   | NA       |
| unknown | NA | NA | NA | SJC_S025438 | NA | NA | NA | Sjp_0130590.1 | NA                   | NA       |
| unknown | NA | NA | NA | SJC_S025443 | NA | NA | NA | Sjp_0130600.1 | NA                   | NA       |
| unknown | NA | NA | NA | SJC_S025453 | NA | NA | NA | Sjp_0130610.1 | NA                   | NA       |
| unknown | NA | NA | NA | SJC_S025466 | NA | NA | NA | Sjp_0130620.1 | catalytic activity   | 0.035844 |
| unknown | NA | NA | NA | SJC_S025475 | NA | NA | NA | Sjp_0130630.1 | NA                   | NA       |
| unknown | NA | NA | NA | SJC_S025484 | NA | NA | NA | Sjp_0130640.1 | NA                   | NA       |
| unknown | NA | NA | NA | SJC_S025516 | NA | NA | NA | Sjp_0130650.1 | NA                   | NA       |
| unknown | NA | NA | NA | SJC_S025530 | NA | NA | NA | Sjp_0130660.1 | cell part            | 0.009037 |
| unknown | NA | NA | NA | SJC_S025547 | NA | NA | NA | Sjp_0130670.1 | biological           | 0.76396  |

|         |    |    |    |             |    |    |    |               |                       |          |
|---------|----|----|----|-------------|----|----|----|---------------|-----------------------|----------|
|         |    |    |    |             |    |    |    |               | regulation            |          |
| unknown | NA | NA | NA | SJC_S025559 | NA | NA | NA | Sjp_0130680.1 | NA                    | NA       |
| unknown | NA | NA | NA | SJC_S025570 | NA | NA | NA | Sjp_0130690.1 | NA                    | NA       |
| unknown | NA | NA | NA | SJC_S025591 | NA | NA | NA | Sjp_0130700.1 | NA                    | NA       |
| unknown | NA | NA | NA | SJC_S025592 | NA | NA | NA | Sjp_0130710.1 | NA                    | NA       |
| unknown | NA | NA | NA | SJC_S025610 | NA | NA | NA | Sjp_0130720.1 | NA                    | NA       |
| unknown | NA | NA | NA | SJC_S025619 | NA | NA | NA | Sjp_0130730.1 | NA                    | NA       |
| unknown | NA | NA | NA | SJC_S025624 | NA | NA | NA | Sjp_0130740.1 | NA                    | NA       |
| unknown | NA | NA | NA | SJC_S025632 | NA | NA | NA | Sjp_0130750.1 | NA                    | NA       |
| unknown | NA | NA | NA | SJC_S025645 | NA | NA | NA | Sjp_0130760.1 | biological regulation | 0.76396  |
| unknown | NA | NA | NA | SJC_S025655 | NA | NA | NA | Sjp_0130780.1 | biological regulation | 0.76396  |
| unknown | NA | NA | NA | SJC_S025657 | NA | NA | NA | Sjp_0130790.1 | NA                    | NA       |
| unknown | NA | NA | NA | SJC_S025661 | NA | NA | NA | Sjp_0130800.1 | NA                    | NA       |
| unknown | NA | NA | NA | SJC_S025664 | NA | NA | NA | Sjp_0130810.1 | NA                    | NA       |
| unknown | NA | NA | NA | SJC_S025676 | NA | NA | NA | Sjp_0130820.1 | NA                    | NA       |
| unknown | NA | NA | NA | SJC_S025679 | NA | NA | NA | Sjp_0130830.1 | NA                    | NA       |
| unknown | NA | NA | NA | SJC_S025694 | NA | NA | NA | Sjp_0130840.1 | binding               | 0.052762 |
| unknown | NA | NA | NA | SJC_S025697 | NA | NA | NA | Sjp_0130850.1 | NA                    | NA       |
| unknown | NA | NA | NA | SJC_S025703 | NA | NA | NA | Sjp_0130860.1 | NA                    | NA       |
| unknown | NA | NA | NA | SJC_S025704 | NA | NA | NA | Sjp_0130870.1 | transporter activity  | 0.782    |
| unknown | NA | NA | NA | SJC_S025711 | NA | NA | NA | Sjp_0130880.1 | NA                    | NA       |
| unknown | NA | NA | NA | SJC_S025712 | NA | NA | NA | Sjp_0130890.1 | binding               | 0.052762 |
| unknown | NA | NA | NA | SJC_S025726 | NA | NA | NA | Sjp_0130900.1 | NA                    | NA       |
| unknown | NA | NA | NA | SJC_S025738 | NA | NA | NA | Sjp_0130910.1 | NA                    | NA       |
| unknown | NA | NA | NA | SJC_S025748 | NA | NA | NA | Sjp_0130920.1 | NA                    | NA       |
| unknown | NA | NA | NA | SJC_S025758 | NA | NA | NA | Sjp_0130940.1 | NA                    | NA       |
| unknown | NA | NA | NA | SJC_S025765 | NA | NA | NA | Sjp_0130950.1 | NA                    | NA       |
| unknown | NA | NA | NA | SJC_S025768 | NA | NA | NA | Sjp_0130960.1 | NA                    | NA       |
| unknown | NA | NA | NA | SJC_S025770 | NA | NA | NA | Sjp_0130970.1 | biological regulation | 0.76396  |
| unknown | NA | NA | NA | SJC_S025774 | NA | NA | NA | Sjp_0130980.1 | NA                    | NA       |



|              |    |          |          |             |      |       |    |               |                                               |          |
|--------------|----|----------|----------|-------------|------|-------|----|---------------|-----------------------------------------------|----------|
| unknown      | NA | NA       | NA       | SJC_S025785 | NA   | NA    | NA | Sjp_0130990.1 | NA                                            | NA       |
| unknown      | NA | NA       | NA       | SJC_S025786 | NA   | NA    | NA | Sjp_0131000.1 | NA                                            | NA       |
| HSB10kb_1401 | 1  | 16582835 | 16593137 | SJC_S025795 | 4456 | 18805 | -  | Sjp_0131020.1 | cellular component organization or biogenesis | NA       |
| unknown      | NA | NA       | NA       | SJC_S025799 | NA   | NA    | NA | Sjp_0131030.1 | NA                                            | NA       |
| unknown      | NA | NA       | NA       | SJC_S025800 | NA   | NA    | NA | Sjp_0131040.1 | catalytic activity                            | 0.035844 |
| HSB10kb_1402 | 1  | 15276789 | 15295337 | SJC_S025801 | 5366 | 17330 | -  | Sjp_0131050.1 | binding                                       | 0.052762 |
| unknown      | NA | NA       | NA       | SJC_S025804 | NA   | NA    | NA | Sjp_0131060.1 | NA                                            | NA       |
| unknown      | NA | NA       | NA       | SJC_S025814 | NA   | NA    | NA | Sjp_0131070.1 | catalytic activity                            | 0.035844 |
| unknown      | NA | NA       | NA       | SJC_S025817 | NA   | NA    | NA | Sjp_0131080.1 | NA                                            | NA       |
| unknown      | NA | NA       | NA       | SJC_S025829 | NA   | NA    | NA | Sjp_0131090.1 | NA                                            | NA       |
| unknown      | NA | NA       | NA       | SJC_S025830 | NA   | NA    | NA | Sjp_0131100.1 | NA                                            | NA       |
| unknown      | NA | NA       | NA       | SJC_S025833 | NA   | NA    | NA | Sjp_0131110.1 | NA                                            | NA       |
| unknown      | NA | NA       | NA       | SJC_S025853 | NA   | NA    | NA | Sjp_0131120.1 | NA                                            | NA       |
| unknown      | NA | NA       | NA       | SJC_S025879 | NA   | NA    | NA | Sjp_0131130.1 | NA                                            | NA       |
| unknown      | NA | NA       | NA       | SJC_S025894 | NA   | NA    | NA | Sjp_0131140.1 | NA                                            | NA       |
| unknown      | NA | NA       | NA       | SJC_S025897 | NA   | NA    | NA | Sjp_0131150.1 | NA                                            | NA       |
| unknown      | NA | NA       | NA       | SJC_S025901 | NA   | NA    | NA | Sjp_0131160.1 | cellular process                              | 0.63852  |
| unknown      | NA | NA       | NA       | SJC_S025902 | NA   | NA    | NA | Sjp_0131170.1 | NA                                            | NA       |
| unknown      | NA | NA       | NA       | SJC_S025909 | NA   | NA    | NA | Sjp_0131180.1 | biological regulation                         | 0.76396  |
| unknown      | NA | NA       | NA       | SJC_S025919 | NA   | NA    | NA | Sjp_0131190.1 | NA                                            | NA       |
| unknown      | NA | NA       | NA       | SJC_S025921 | NA   | NA    | NA | Sjp_0131200.1 | binding                                       | 0.052762 |
| unknown      | NA | NA       | NA       | SJC_S025924 | NA   | NA    | NA | Sjp_0131210.1 | cell part                                     | 0.009037 |
| unknown      | NA | NA       | NA       | SJC_S025936 | NA   | NA    | NA | Sjp_0131220.1 | NA                                            | NA       |
| unknown      | NA | NA       | NA       | SJC_S025950 | NA   | NA    | NA | Sjp_0131230.1 | binding                                       | 0.052762 |
| unknown      | NA | NA       | NA       | SJC_S025951 | NA   | NA    | NA | Sjp_0131240.1 | catalytic activity                            | 0.035844 |
| unknown      | NA | NA       | NA       | SJC_S025956 | NA   | NA    | NA | Sjp_0131250.1 | NA                                            | NA       |
| unknown      | NA | NA       | NA       | SJC_S025957 | NA   | NA    | NA | Sjp_0131260.1 | NA                                            | NA       |
| unknown      | NA | NA       | NA       | SJC_S025960 | NA   | NA    | NA | Sjp_0131270.1 | NA                                            | NA       |
| unknown      | NA | NA       | NA       | SJC_S025960 | NA   | NA    | NA | Sjp_0131280.1 | NA                                            | NA       |
| unknown      | NA | NA       | NA       | SJC_S025968 | NA   | NA    | NA | Sjp_0131290.1 | binding                                       | 0.052762 |

|         |    |    |    |             |    |    |    |               |                    |          |
|---------|----|----|----|-------------|----|----|----|---------------|--------------------|----------|
| unknown | NA | NA | NA | SJC_S025968 | NA | NA | NA | Sjp_0131300.1 | catalytic activity | 0.035844 |
| unknown | NA | NA | NA | SJC_S025973 | NA | NA | NA | Sjp_0131310.1 | NA                 | NA       |
| unknown | NA | NA | NA | SJC_S025978 | NA | NA | NA | Sjp_0131320.1 | cell part          | 0.009037 |
| unknown | NA | NA | NA | SJC_S025992 | NA | NA | NA | Sjp_0131330.1 | NA                 | NA       |
| unknown | NA | NA | NA | SJC_S025993 | NA | NA | NA | Sjp_0131340.1 | NA                 | NA       |
| unknown | NA | NA | NA | SJC_S026013 | NA | NA | NA | Sjp_0131350.1 | NA                 | NA       |
| unknown | NA | NA | NA | SJC_S026020 | NA | NA | NA | Sjp_0131360.1 | NA                 | NA       |
| unknown | NA | NA | NA | SJC_S026024 | NA | NA | NA | Sjp_0131370.1 | NA                 | NA       |
| unknown | NA | NA | NA | SJC_S026027 | NA | NA | NA | Sjp_0131380.1 | NA                 | NA       |
| unknown | NA | NA | NA | SJC_S026028 | NA | NA | NA | Sjp_0131390.1 | NA                 | NA       |
| unknown | NA | NA | NA | SJC_S026035 | NA | NA | NA | Sjp_0131400.1 | cell part          | 0.009037 |
| unknown | NA | NA | NA | SJC_S026039 | NA | NA | NA | Sjp_0131410.1 | NA                 | NA       |
| unknown | NA | NA | NA | SJC_S026040 | NA | NA | NA | Sjp_0131420.1 | NA                 | NA       |
| unknown | NA | NA | NA | SJC_S026041 | NA | NA | NA | Sjp_0131430.1 | NA                 | NA       |
| unknown | NA | NA | NA | SJC_S026042 | NA | NA | NA | Sjp_0131440.1 | NA                 | NA       |
| unknown | NA | NA | NA | SJC_S026043 | NA | NA | NA | Sjp_0131450.1 | NA                 | NA       |
| unknown | NA | NA | NA | SJC_S026045 | NA | NA | NA | Sjp_0131460.1 | NA                 | NA       |
| unknown | NA | NA | NA | SJC_S026046 | NA | NA | NA | Sjp_0131470.1 | binding            | 0.052762 |
| unknown | NA | NA | NA | SJC_S026048 | NA | NA | NA | Sjp_0131480.1 | NA                 | NA       |
| unknown | NA | NA | NA | SJC_S026049 | NA | NA | NA | Sjp_0131490.1 | cellular process   | 0.63852  |
| unknown | NA | NA | NA | SJC_S026050 | NA | NA | NA | Sjp_0131510.1 | NA                 | NA       |
| unknown | NA | NA | NA | SJC_S026051 | NA | NA | NA | Sjp_0131520.1 | NA                 | NA       |
| unknown | NA | NA | NA | SJC_S026054 | NA | NA | NA | Sjp_0131530.1 | catalytic activity | 0.035844 |
| unknown | NA | NA | NA | SJC_S026055 | NA | NA | NA | Sjp_0131540.1 | NA                 | NA       |
| unknown | NA | NA | NA | SJC_S026056 | NA | NA | NA | Sjp_0131550.1 | NA                 | NA       |
| unknown | NA | NA | NA | SJC_S026056 | NA | NA | NA | Sjp_0131560.1 | NA                 | NA       |
| unknown | NA | NA | NA | SJC_S026056 | NA | NA | NA | Sjp_0131570.1 | NA                 | NA       |
| unknown | NA | NA | NA | SJC_S026057 | NA | NA | NA | Sjp_0131580.1 | NA                 | NA       |
| unknown | NA | NA | NA | SJC_S026059 | NA | NA | NA | Sjp_0131590.1 | NA                 | NA       |
| unknown | NA | NA | NA | SJC_S026060 | NA | NA | NA | Sjp_0131600.1 | NA                 | NA       |
| unknown | NA | NA | NA | SJC_S026063 | NA | NA | NA | Sjp_0131610.1 | NA                 | NA       |
| unknown | NA | NA | NA | SJC_S026063 | NA | NA | NA | Sjp_0131620.1 | NA                 | NA       |
| unknown | NA | NA | NA | SJC_S026067 | NA | NA | NA | Sjp_0131630.1 | NA                 | NA       |
| unknown | NA | NA | NA | SJC_S026069 | NA | NA | NA | Sjp_0131640.1 | NA                 | NA       |

|              |    |          |          |             |       |       |    |               |                               |          |
|--------------|----|----------|----------|-------------|-------|-------|----|---------------|-------------------------------|----------|
| unknown      | NA | NA       | NA       | SJC_S026070 | NA    | NA    | NA | Sjp_0131650.1 | NA                            | NA       |
| unknown      | NA | NA       | NA       | SJC_S026071 | NA    | NA    | NA | Sjp_0131660.1 | NA                            | NA       |
| unknown      | NA | NA       | NA       | SJC_S026071 | NA    | NA    | NA | Sjp_0131670.1 | NA                            | NA       |
| unknown      | NA | NA       | NA       | SJC_S026074 | NA    | NA    | NA | Sjp_0131680.1 | NA                            | NA       |
| unknown      | NA | NA       | NA       | SJC_S026078 | NA    | NA    | NA | Sjp_0131690.1 | NA                            | NA       |
| unknown      | NA | NA       | NA       | SJC_S026082 | NA    | NA    | NA | Sjp_0131700.1 | NA                            | NA       |
| unknown      | NA | NA       | NA       | SJC_S026086 | NA    | NA    | NA | Sjp_0131730.1 | molecular transducer activity | 0.50162  |
| unknown      | NA | NA       | NA       | SJC_S026088 | NA    | NA    | NA | Sjp_0131740.1 | NA                            | NA       |
| unknown      | NA | NA       | NA       | SJC_S026091 | NA    | NA    | NA | Sjp_0131750.1 | binding                       | 0.052762 |
| unknown      | NA | NA       | NA       | SJC_S026091 | NA    | NA    | NA | Sjp_0131760.1 | NA                            | NA       |
| unknown      | NA | NA       | NA       | SJC_S026092 | NA    | NA    | NA | Sjp_0131770.1 | biological regulation         | 0.76396  |
| unknown      | NA | NA       | NA       | SJC_S026097 | NA    | NA    | NA | Sjp_0131780.1 | cell part                     | 0.009037 |
| unknown      | NA | NA       | NA       | SJC_S026100 | NA    | NA    | NA | Sjp_0131790.1 | NA                            | NA       |
| unknown      | NA | NA       | NA       | SJC_S026102 | NA    | NA    | NA | Sjp_0131800.1 | NA                            | NA       |
| unknown      | NA | NA       | NA       | SJC_S026105 | NA    | NA    | NA | Sjp_0131810.1 | catalytic activity            | 0.035844 |
| unknown      | NA | NA       | NA       | SJC_S026108 | NA    | NA    | NA | Sjp_0131820.1 | binding                       | 0.052762 |
| unknown      | NA | NA       | NA       | SJC_S026109 | NA    | NA    | NA | Sjp_0131830.1 | catalytic activity            | 0.035844 |
| unknown      | NA | NA       | NA       | SJC_S026109 | NA    | NA    | NA | Sjp_0131840.1 | NA                            | NA       |
| unknown      | NA | NA       | NA       | SJC_S026110 | NA    | NA    | NA | Sjp_0131850.1 | NA                            | NA       |
| HSB10kb_1403 | 4  | 7890397  | 7911297  | SJC_S026111 | 13244 | 30770 | +  | Sjp_0131860.1 | NA                            | NA       |
| HSB10kb_1403 | 4  | 7890397  | 7911297  | SJC_S026111 | 13244 | 30770 | +  | Sjp_0131870.1 | NA                            | NA       |
| unknown      | NA | NA       | NA       | SJC_S026112 | NA    | NA    | NA | Sjp_0131880.1 | NA                            | NA       |
| unknown      | NA | NA       | NA       | SJC_S026114 | NA    | NA    | NA | Sjp_0131890.1 | cellular process              | 0.63852  |
| unknown      | NA | NA       | NA       | SJC_S026115 | NA    | NA    | NA | Sjp_0131900.1 | NA                            | NA       |
| unknown      | NA | NA       | NA       | SJC_S026120 | NA    | NA    | NA | Sjp_0131910.1 | NA                            | NA       |
| unknown      | NA | NA       | NA       | SJC_S026124 | NA    | NA    | NA | Sjp_0131930.1 | NA                            | NA       |
| unknown      | NA | NA       | NA       | SJC_S026129 | NA    | NA    | NA | Sjp_0131950.1 | NA                            | NA       |
| HSB10kb_1404 | WZ | 25679613 | 25698714 | SJC_S026135 | 193   | 12823 | +  | Sjp_0131960.1 | molecular transducer activity | 0.50162  |
| unknown      | NA | NA       | NA       | SJC_S026137 | NA    | NA    | NA | Sjp_0131970.1 | NA                            | NA       |

|              |    |          |          |             |       |       |    |               |                       |          |
|--------------|----|----------|----------|-------------|-------|-------|----|---------------|-----------------------|----------|
| unknown      | NA | NA       | NA       | SJC_S026140 | NA    | NA    | NA | Sjp_0131980.1 | cell part             | 0.009037 |
| unknown      | NA | NA       | NA       | SJC_S026141 | NA    | NA    | NA | Sjp_0131990.1 | NA                    | NA       |
| unknown      | NA | NA       | NA       | SJC_S026153 | NA    | NA    | NA | Sjp_0132000.1 | NA                    | NA       |
| unknown      | NA | NA       | NA       | SJC_S026157 | NA    | NA    | NA | Sjp_0132010.1 | NA                    | NA       |
| unknown      | NA | NA       | NA       | SJC_S026158 | NA    | NA    | NA | Sjp_0132020.1 | NA                    | NA       |
| unknown      | NA | NA       | NA       | SJC_S026162 | NA    | NA    | NA | Sjp_0132030.1 | NA                    | NA       |
| unknown      | NA | NA       | NA       | SJC_S026166 | NA    | NA    | NA | Sjp_0132040.1 | NA                    | NA       |
| unknown      | NA | NA       | NA       | SJC_S026167 | NA    | NA    | NA | Sjp_0132050.1 | cellular process      | 0.63852  |
| unknown      | NA | NA       | NA       | SJC_S026169 | NA    | NA    | NA | Sjp_0132060.1 | NA                    | NA       |
| unknown      | NA | NA       | NA       | SJC_S026170 | NA    | NA    | NA | Sjp_0132070.1 | NA                    | NA       |
| unknown      | NA | NA       | NA       | SJC_S026170 | NA    | NA    | NA | Sjp_0132080.1 | NA                    | NA       |
| unknown      | NA | NA       | NA       | SJC_S026173 | NA    | NA    | NA | Sjp_0132090.1 | binding               | 0.052762 |
| HSB10kb_1405 | 1  | 42447323 | 42468780 | SJC_S026175 | 21256 | 38729 | -  | Sjp_0132100.1 | NA                    | NA       |
| unknown      | NA | NA       | NA       | SJC_S026180 | NA    | NA    | NA | Sjp_0132120.1 | NA                    | NA       |
| unknown      | NA | NA       | NA       | SJC_S026181 | NA    | NA    | NA | Sjp_0132130.1 | biological regulation | 0.76396  |
| unknown      | NA | NA       | NA       | SJC_S026185 | NA    | NA    | NA | Sjp_0132140.1 | NA                    | NA       |
| unknown      | NA | NA       | NA       | SJC_S026206 | NA    | NA    | NA | Sjp_0132160.1 | NA                    | NA       |
| unknown      | NA | NA       | NA       | SJC_S026219 | NA    | NA    | NA | Sjp_0132170.1 | NA                    | NA       |
| unknown      | NA | NA       | NA       | SJC_S026223 | NA    | NA    | NA | Sjp_0132180.1 | binding               | 0.052762 |
| unknown      | NA | NA       | NA       | SJC_S026233 | NA    | NA    | NA | Sjp_0132190.1 | NA                    | NA       |
| unknown      | NA | NA       | NA       | SJC_S026254 | NA    | NA    | NA | Sjp_0132200.1 | NA                    | NA       |
| unknown      | NA | NA       | NA       | SJC_S026275 | NA    | NA    | NA | Sjp_0132210.1 | NA                    | NA       |
| unknown      | NA | NA       | NA       | SJC_S026280 | NA    | NA    | NA | Sjp_0132220.1 | catalytic activity    | 0.035844 |
| unknown      | NA | NA       | NA       | SJC_S026284 | NA    | NA    | NA | Sjp_0132230.1 | NA                    | NA       |
| HSB10kb_1406 | 3  | 12574720 | 12595199 | SJC_S026286 | 984   | 16241 | -  | Sjp_0132240.1 | NA                    | NA       |
| HSB10kb_1406 | 3  | 12574720 | 12595199 | SJC_S026286 | 984   | 16241 | -  | Sjp_0132250.1 | NA                    | NA       |
| HSB10kb_1406 | 3  | 12574720 | 12595199 | SJC_S026286 | 984   | 16241 | -  | Sjp_0132260.1 | NA                    | NA       |
| HSB10kb_1406 | 3  | 12574720 | 12595199 | SJC_S026286 | 984   | 16241 | -  | Sjp_0132270.1 | NA                    | NA       |
| unknown      | NA | NA       | NA       | SJC_S026287 | NA    | NA    | NA | Sjp_0132280.1 | biological regulation | 0.76396  |
| unknown      | NA | NA       | NA       | SJC_S026292 | NA    | NA    | NA | Sjp_0132290.1 | NA                    | NA       |
| unknown      | NA | NA       | NA       | SJC_S026295 | NA    | NA    | NA | Sjp_0132300.1 | NA                    | NA       |
| unknown      | NA | NA       | NA       | SJC_S026296 | NA    | NA    | NA | Sjp_0132310.1 | NA                    | NA       |

|         |    |    |    |             |    |    |    |               |                       |          |
|---------|----|----|----|-------------|----|----|----|---------------|-----------------------|----------|
| unknown | NA | NA | NA | SJC_S026299 | NA | NA | NA | Sjp_0132320.1 | NA                    | NA       |
| unknown | NA | NA | NA | SJC_S026300 | NA | NA | NA | Sjp_0132330.1 | NA                    | NA       |
| unknown | NA | NA | NA | SJC_S026304 | NA | NA | NA | Sjp_0132340.1 | biological regulation | 0.76396  |
| unknown | NA | NA | NA | SJC_S026307 | NA | NA | NA | Sjp_0132350.1 | NA                    | NA       |
| unknown | NA | NA | NA | SJC_S026309 | NA | NA | NA | Sjp_0132360.1 | binding               | 0.052762 |
| unknown | NA | NA | NA | SJC_S026310 | NA | NA | NA | Sjp_0132370.1 | NA                    | NA       |
| unknown | NA | NA | NA | SJC_S026314 | NA | NA | NA | Sjp_0132380.1 | NA                    | NA       |
| unknown | NA | NA | NA | SJC_S026322 | NA | NA | NA | Sjp_0132390.1 | metabolic process     | 0.41934  |
| unknown | NA | NA | NA | SJC_S026326 | NA | NA | NA | Sjp_0132400.1 | NA                    | NA       |
| unknown | NA | NA | NA | SJC_S026331 | NA | NA | NA | Sjp_0132410.1 | catalytic activity    | 0.035844 |
| unknown | NA | NA | NA | SJC_S026339 | NA | NA | NA | Sjp_0132420.1 | NA                    | NA       |
| unknown | NA | NA | NA | SJC_S026339 | NA | NA | NA | Sjp_0132430.1 | NA                    | NA       |
| unknown | NA | NA | NA | SJC_S026340 | NA | NA | NA | Sjp_0132440.1 | NA                    | NA       |
| unknown | NA | NA | NA | SJC_S026341 | NA | NA | NA | Sjp_0132450.1 | NA                    | NA       |
| unknown | NA | NA | NA | SJC_S026342 | NA | NA | NA | Sjp_0132460.1 | NA                    | NA       |
| unknown | NA | NA | NA | SJC_S026342 | NA | NA | NA | Sjp_0132470.1 | NA                    | NA       |
| unknown | NA | NA | NA | SJC_S026346 | NA | NA | NA | Sjp_0132480.1 | catalytic activity    | 0.035844 |
| unknown | NA | NA | NA | SJC_S026350 | NA | NA | NA | Sjp_0132490.1 | catalytic activity    | 0.035844 |
| unknown | NA | NA | NA | SJC_S026357 | NA | NA | NA | Sjp_0132500.1 | NA                    | NA       |
| unknown | NA | NA | NA | SJC_S026367 | NA | NA | NA | Sjp_0132510.1 | catalytic activity    | 0.035844 |
| unknown | NA | NA | NA | SJC_S026374 | NA | NA | NA | Sjp_0132520.1 | NA                    | NA       |
| unknown | NA | NA | NA | SJC_S026392 | NA | NA | NA | Sjp_0132530.1 | NA                    | NA       |
| unknown | NA | NA | NA | SJC_S026399 | NA | NA | NA | Sjp_0132540.1 | NA                    | NA       |
| unknown | NA | NA | NA | SJC_S026406 | NA | NA | NA | Sjp_0132550.1 | catalytic activity    | 0.035844 |
| unknown | NA | NA | NA | SJC_S026413 | NA | NA | NA | Sjp_0132560.1 | NA                    | NA       |
| unknown | NA | NA | NA | SJC_S026418 | NA | NA | NA | Sjp_0132570.1 | binding               | 0.052762 |
| unknown | NA | NA | NA | SJC_S026419 | NA | NA | NA | Sjp_0132580.1 | NA                    | NA       |
| unknown | NA | NA | NA | SJC_S026422 | NA | NA | NA | Sjp_0132590.1 | NA                    | NA       |
| unknown | NA | NA | NA | SJC_S026430 | NA | NA | NA | Sjp_0132600.1 | NA                    | NA       |
| unknown | NA | NA | NA | SJC_S026441 | NA | NA | NA | Sjp_0132620.1 | NA                    | NA       |
| unknown | NA | NA | NA | SJC_S026448 | NA | NA | NA | Sjp_0132630.1 | catalytic activity    | 0.035844 |
| unknown | NA | NA | NA | SJC_S026460 | NA | NA | NA | Sjp_0132640.1 | NA                    | NA       |

|         |    |    |    |             |    |    |    |               |                       |          |
|---------|----|----|----|-------------|----|----|----|---------------|-----------------------|----------|
| unknown | NA | NA | NA | SJC_S026474 | NA | NA | NA | Sjp_0132650.1 | binding               | 0.052762 |
| unknown | NA | NA | NA | SJC_S026479 | NA | NA | NA | Sjp_0132660.1 | NA                    | NA       |
| unknown | NA | NA | NA | SJC_S026485 | NA | NA | NA | Sjp_0132670.1 | NA                    | NA       |
| unknown | NA | NA | NA | SJC_S026488 | NA | NA | NA | Sjp_0132680.1 | NA                    | NA       |
| unknown | NA | NA | NA | SJC_S026493 | NA | NA | NA | Sjp_0132690.1 | NA                    | NA       |
| unknown | NA | NA | NA | SJC_S026497 | NA | NA | NA | Sjp_0132700.1 | NA                    | NA       |
| unknown | NA | NA | NA | SJC_S026498 | NA | NA | NA | Sjp_0132710.1 | NA                    | NA       |
| unknown | NA | NA | NA | SJC_S026502 | NA | NA | NA | Sjp_0132720.1 | biological regulation | 0.76396  |
| unknown | NA | NA | NA | SJC_S026507 | NA | NA | NA | Sjp_0132730.1 | NA                    | NA       |
| unknown | NA | NA | NA | SJC_S026516 | NA | NA | NA | Sjp_0132740.1 | NA                    | NA       |
| unknown | NA | NA | NA | SJC_S026518 | NA | NA | NA | Sjp_0132750.1 | metabolic process     | 0.41934  |
| unknown | NA | NA | NA | SJC_S026527 | NA | NA | NA | Sjp_0132760.1 | catalytic activity    | 0.035844 |
| unknown | NA | NA | NA | SJC_S026537 | NA | NA | NA | Sjp_0132770.1 | NA                    | NA       |
| unknown | NA | NA | NA | SJC_S026542 | NA | NA | NA | Sjp_0132780.1 | binding               | 0.052762 |
| unknown | NA | NA | NA | SJC_S026575 | NA | NA | NA | Sjp_0132800.1 | NA                    | NA       |
| unknown | NA | NA | NA | SJC_S026585 | NA | NA | NA | Sjp_0132810.1 | biological regulation | 0.76396  |
| unknown | NA | NA | NA | SJC_S026588 | NA | NA | NA | Sjp_0132820.1 | transporter activity  | 0.782    |
| unknown | NA | NA | NA | SJC_S026605 | NA | NA | NA | Sjp_0132830.1 | NA                    | NA       |
| unknown | NA | NA | NA | SJC_S026618 | NA | NA | NA | Sjp_0132840.1 | NA                    | NA       |
| unknown | NA | NA | NA | SJC_S026629 | NA | NA | NA | Sjp_0132850.1 | cellular process      | 0.63852  |
| unknown | NA | NA | NA | SJC_S026630 | NA | NA | NA | Sjp_0132860.1 | NA                    | NA       |
| unknown | NA | NA | NA | SJC_S026631 | NA | NA | NA | Sjp_0132870.1 | NA                    | NA       |
| unknown | NA | NA | NA | SJC_S026633 | NA | NA | NA | Sjp_0132880.1 | catalytic activity    | 0.035844 |
| unknown | NA | NA | NA | SJC_S026646 | NA | NA | NA | Sjp_0132890.1 | biological regulation | 0.76396  |
| unknown | NA | NA | NA | SJC_S026649 | NA | NA | NA | Sjp_0132900.1 | catalytic activity    | 0.035844 |
| unknown | NA | NA | NA | SJC_S026652 | NA | NA | NA | Sjp_0132910.1 | NA                    | NA       |
| unknown | NA | NA | NA | SJC_S026653 | NA | NA | NA | Sjp_0132920.1 | binding               | 0.052762 |
| unknown | NA | NA | NA | SJC_S026673 | NA | NA | NA | Sjp_0132930.1 | NA                    | NA       |
| unknown | NA | NA | NA | SJC_S026673 | NA | NA | NA | Sjp_0132940.1 | NA                    | NA       |

|         |    |    |    |             |    |    |    |               |                                               |          |
|---------|----|----|----|-------------|----|----|----|---------------|-----------------------------------------------|----------|
| unknown | NA | NA | NA | SJC_S026677 | NA | NA | NA | Sjp_0132950.1 | cellular process                              | 0.63852  |
| unknown | NA | NA | NA | SJC_S026678 | NA | NA | NA | Sjp_0132960.1 | binding                                       | 0.052762 |
| unknown | NA | NA | NA | SJC_S026680 | NA | NA | NA | Sjp_0132970.1 | NA                                            | NA       |
| unknown | NA | NA | NA | SJC_S026682 | NA | NA | NA | Sjp_0132980.1 | NA                                            | NA       |
| unknown | NA | NA | NA | SJC_S026704 | NA | NA | NA | Sjp_0132990.1 | NA                                            | NA       |
| unknown | NA | NA | NA | SJC_S026705 | NA | NA | NA | Sjp_0133000.1 | NA                                            | NA       |
| unknown | NA | NA | NA | SJC_S026712 | NA | NA | NA | Sjp_0133010.1 | NA                                            | NA       |
| unknown | NA | NA | NA | SJC_S026722 | NA | NA | NA | Sjp_0133020.1 | NA                                            | NA       |
| unknown | NA | NA | NA | SJC_S026724 | NA | NA | NA | Sjp_0133030.1 | metabolic process                             | 0.41934  |
| unknown | NA | NA | NA | SJC_S026730 | NA | NA | NA | Sjp_0133040.1 | NA                                            | NA       |
| unknown | NA | NA | NA | SJC_S026735 | NA | NA | NA | Sjp_0133050.1 | NA                                            | NA       |
| unknown | NA | NA | NA | SJC_S026736 | NA | NA | NA | Sjp_0133060.1 | NA                                            | NA       |
| unknown | NA | NA | NA | SJC_S026737 | NA | NA | NA | Sjp_0133070.1 | NA                                            | NA       |
| unknown | NA | NA | NA | SJC_S026738 | NA | NA | NA | Sjp_0133080.1 | NA                                            | NA       |
| unknown | NA | NA | NA | SJC_S026739 | NA | NA | NA | Sjp_0133090.1 | binding                                       | 0.052762 |
| unknown | NA | NA | NA | SJC_S026741 | NA | NA | NA | Sjp_0133100.1 | NA                                            | NA       |
| unknown | NA | NA | NA | SJC_S026745 | NA | NA | NA | Sjp_0133110.1 | binding                                       | 0.052762 |
| unknown | NA | NA | NA | SJC_S026748 | NA | NA | NA | Sjp_0133120.1 | cellular component organization or biogenesis | NA       |
| unknown | NA | NA | NA | SJC_S026750 | NA | NA | NA | Sjp_0133130.1 | NA                                            | NA       |
| unknown | NA | NA | NA | SJC_S026753 | NA | NA | NA | Sjp_0133140.1 | NA                                            | NA       |
| unknown | NA | NA | NA | SJC_S026757 | NA | NA | NA | Sjp_0133150.1 | NA                                            | NA       |
| unknown | NA | NA | NA | SJC_S026761 | NA | NA | NA | Sjp_0133160.1 | NA                                            | NA       |
| unknown | NA | NA | NA | SJC_S026763 | NA | NA | NA | Sjp_0133170.1 | NA                                            | NA       |
| unknown | NA | NA | NA | SJC_S026766 | NA | NA | NA | Sjp_0133180.1 | NA                                            | NA       |
| unknown | NA | NA | NA | SJC_S026767 | NA | NA | NA | Sjp_0133190.1 | cell part                                     | 0.009037 |
| unknown | NA | NA | NA | SJC_S026768 | NA | NA | NA | Sjp_0133200.1 | NA                                            | NA       |
| unknown | NA | NA | NA | SJC_S026769 | NA | NA | NA | Sjp_0133210.1 | biological regulation                         | 0.76396  |
| unknown | NA | NA | NA | SJC_S026770 | NA | NA | NA | Sjp_0133220.1 | cellular process                              | 0.63852  |
| unknown | NA | NA | NA | SJC_S026772 | NA | NA | NA | Sjp_0133230.1 | NA                                            | NA       |

|         |    |    |    |             |    |    |    |               |                               |          |
|---------|----|----|----|-------------|----|----|----|---------------|-------------------------------|----------|
| unknown | NA | NA | NA | SJC_S026775 | NA | NA | NA | Sjp_0133250.1 | NA                            | NA       |
| unknown | NA | NA | NA | SJC_S026776 | NA | NA | NA | Sjp_0133260.1 | biological regulation         | 0.76396  |
| unknown | NA | NA | NA | SJC_S026780 | NA | NA | NA | Sjp_0133270.1 | NA                            | NA       |
| unknown | NA | NA | NA | SJC_S026794 | NA | NA | NA | Sjp_0133280.1 | catalytic activity            | 0.035844 |
| unknown | NA | NA | NA | SJC_S026803 | NA | NA | NA | Sjp_0133290.1 | establishment of localization | NA       |
| unknown | NA | NA | NA | SJC_S026806 | NA | NA | NA | Sjp_0133300.1 | NA                            | NA       |
| unknown | NA | NA | NA | SJC_S026807 | NA | NA | NA | Sjp_0133310.1 | binding                       | 0.052762 |
| unknown | NA | NA | NA | SJC_S026812 | NA | NA | NA | Sjp_0133320.1 | NA                            | NA       |
| unknown | NA | NA | NA | SJC_S026815 | NA | NA | NA | Sjp_0133330.1 | NA                            | NA       |
| unknown | NA | NA | NA | SJC_S026826 | NA | NA | NA | Sjp_0133350.1 | NA                            | NA       |
| unknown | NA | NA | NA | SJC_S026830 | NA | NA | NA | Sjp_0133360.1 | NA                            | NA       |
| unknown | NA | NA | NA | SJC_S026841 | NA | NA | NA | Sjp_0133370.1 | NA                            | NA       |
| unknown | NA | NA | NA | SJC_S026848 | NA | NA | NA | Sjp_0133380.1 | NA                            | NA       |
| unknown | NA | NA | NA | SJC_S026852 | NA | NA | NA | Sjp_0133390.1 | NA                            | NA       |
| unknown | NA | NA | NA | SJC_S026858 | NA | NA | NA | Sjp_0133400.1 | NA                            | NA       |
| unknown | NA | NA | NA | SJC_S026933 | NA | NA | NA | Sjp_0133420.1 | NA                            | NA       |
| unknown | NA | NA | NA | SJC_S026935 | NA | NA | NA | Sjp_0133430.1 | binding                       | 0.052762 |
| unknown | NA | NA | NA | SJC_S026938 | NA | NA | NA | Sjp_0133440.1 | NA                            | NA       |
| unknown | NA | NA | NA | SJC_S026940 | NA | NA | NA | Sjp_0133450.1 | NA                            | NA       |
| unknown | NA | NA | NA | SJC_S026943 | NA | NA | NA | Sjp_0133460.1 | NA                            | NA       |
| unknown | NA | NA | NA | SJC_S026948 | NA | NA | NA | Sjp_0133470.1 | NA                            | NA       |
| unknown | NA | NA | NA | SJC_S026956 | NA | NA | NA | Sjp_0133480.1 | NA                            | NA       |
| unknown | NA | NA | NA | SJC_S026962 | NA | NA | NA | Sjp_0133490.1 | biological regulation         | 0.76396  |
| unknown | NA | NA | NA | SJC_S026969 | NA | NA | NA | Sjp_0133500.1 | NA                            | NA       |
| unknown | NA | NA | NA | SJC_S026987 | NA | NA | NA | Sjp_0133510.1 | cellular process              | 0.63852  |
| unknown | NA | NA | NA | SJC_S026988 | NA | NA | NA | Sjp_0133520.1 | NA                            | NA       |
| unknown | NA | NA | NA | SJC_S027031 | NA | NA | NA | Sjp_0133530.1 | NA                            | NA       |
| unknown | NA | NA | NA | SJC_S027054 | NA | NA | NA | Sjp_0133550.1 | NA                            | NA       |
| unknown | NA | NA | NA | SJC_S027067 | NA | NA | NA | Sjp_0133560.1 | NA                            | NA       |
| unknown | NA | NA | NA | SJC_S027105 | NA | NA | NA | Sjp_0133570.1 | NA                            | NA       |
| unknown | NA | NA | NA | SJC_S027106 | NA | NA | NA | Sjp_0133580.1 | NA                            | NA       |



|         |    |    |    |             |    |    |    |               |                       |          |
|---------|----|----|----|-------------|----|----|----|---------------|-----------------------|----------|
| unknown | NA | NA | NA | SJC_S027121 | NA | NA | NA | Sjp_0133590.1 | transporter activity  | 0.782    |
| unknown | NA | NA | NA | SJC_S027131 | NA | NA | NA | Sjp_0133600.1 | NA                    | NA       |
| unknown | NA | NA | NA | SJC_S027134 | NA | NA | NA | Sjp_0133610.1 | biological regulation | 0.76396  |
| unknown | NA | NA | NA | SJC_S027139 | NA | NA | NA | Sjp_0133620.1 | NA                    | NA       |
| unknown | NA | NA | NA | SJC_S027142 | NA | NA | NA | Sjp_0133630.1 | NA                    | NA       |
| unknown | NA | NA | NA | SJC_S027169 | NA | NA | NA | Sjp_0133640.1 | NA                    | NA       |
| unknown | NA | NA | NA | SJC_S027192 | NA | NA | NA | Sjp_0133650.1 | NA                    | NA       |
| unknown | NA | NA | NA | SJC_S027199 | NA | NA | NA | Sjp_0133660.1 | NA                    | NA       |
| unknown | NA | NA | NA | SJC_S027200 | NA | NA | NA | Sjp_0133670.1 | metabolic process     | 0.41934  |
| unknown | NA | NA | NA | SJC_S027207 | NA | NA | NA | Sjp_0133680.1 | NA                    | NA       |
| unknown | NA | NA | NA | SJC_S027217 | NA | NA | NA | Sjp_0133690.1 | NA                    | NA       |
| unknown | NA | NA | NA | SJC_S027240 | NA | NA | NA | Sjp_0133700.1 | NA                    | NA       |
| unknown | NA | NA | NA | SJC_S027261 | NA | NA | NA | Sjp_0133710.1 | binding               | 0.052762 |
| unknown | NA | NA | NA | SJC_S027350 | NA | NA | NA | Sjp_0133740.1 | NA                    | NA       |
| unknown | NA | NA | NA | SJC_S027354 | NA | NA | NA | Sjp_0133750.1 | NA                    | NA       |
| unknown | NA | NA | NA | SJC_S027358 | NA | NA | NA | Sjp_0133760.1 | binding               | 0.052762 |
| unknown | NA | NA | NA | SJC_S027378 | NA | NA | NA | Sjp_0133780.1 | NA                    | NA       |
| unknown | NA | NA | NA | SJC_S027379 | NA | NA | NA | Sjp_0133790.1 | NA                    | NA       |
| unknown | NA | NA | NA | SJC_S027402 | NA | NA | NA | Sjp_0133810.1 | NA                    | NA       |
| unknown | NA | NA | NA | SJC_S027433 | NA | NA | NA | Sjp_0133830.1 | binding               | 0.052762 |
| unknown | NA | NA | NA | SJC_S027435 | NA | NA | NA | Sjp_0133840.1 | NA                    | NA       |
| unknown | NA | NA | NA | SJC_S027437 | NA | NA | NA | Sjp_0133850.1 | NA                    | NA       |
| unknown | NA | NA | NA | SJC_S027438 | NA | NA | NA | Sjp_0133860.1 | NA                    | NA       |
| unknown | NA | NA | NA | SJC_S027469 | NA | NA | NA | Sjp_0133870.1 | NA                    | NA       |
| unknown | NA | NA | NA | SJC_S027470 | NA | NA | NA | Sjp_0133880.1 | NA                    | NA       |
| unknown | NA | NA | NA | SJC_S027491 | NA | NA | NA | Sjp_0133890.1 | NA                    | NA       |
| unknown | NA | NA | NA | SJC_S027507 | NA | NA | NA | Sjp_0133910.1 | NA                    | NA       |
| unknown | NA | NA | NA | SJC_S027518 | NA | NA | NA | Sjp_0133920.1 | NA                    | NA       |
| unknown | NA | NA | NA | SJC_S027520 | NA | NA | NA | Sjp_0133930.1 | catalytic activity    | 0.035844 |
| unknown | NA | NA | NA | SJC_S027522 | NA | NA | NA | Sjp_0133940.1 | NA                    | NA       |
| unknown | NA | NA | NA | SJC_S027549 | NA | NA | NA | Sjp_0133950.1 | enzyme                | 0.1755   |

|         |    |    |    |             |    |    |    |               |                                               |          |
|---------|----|----|----|-------------|----|----|----|---------------|-----------------------------------------------|----------|
|         |    |    |    |             |    |    |    |               | regulator activity                            |          |
| unknown | NA | NA | NA | SJC_S027602 | NA | NA | NA | Sjp_0133960.1 | cell part                                     | 0.009037 |
| unknown | NA | NA | NA | SJC_S027604 | NA | NA | NA | Sjp_0133970.1 | biological regulation                         | 0.76396  |
| unknown | NA | NA | NA | SJC_S027606 | NA | NA | NA | Sjp_0133980.1 | cell part                                     | 0.009037 |
| unknown | NA | NA | NA | SJC_S027611 | NA | NA | NA | Sjp_0133990.1 | NA                                            | NA       |
| unknown | NA | NA | NA | SJC_S027632 | NA | NA | NA | Sjp_0134000.1 | NA                                            | NA       |
| unknown | NA | NA | NA | SJC_S027646 | NA | NA | NA | Sjp_0134010.1 | cell part                                     | 0.009037 |
| unknown | NA | NA | NA | SJC_S027673 | NA | NA | NA | Sjp_0134020.1 | NA                                            | NA       |
| unknown | NA | NA | NA | SJC_S027676 | NA | NA | NA | Sjp_0134030.1 | NA                                            | NA       |
| unknown | NA | NA | NA | SJC_S027730 | NA | NA | NA | Sjp_0134050.1 | NA                                            | NA       |
| unknown | NA | NA | NA | SJC_S027734 | NA | NA | NA | Sjp_0134060.1 | NA                                            | NA       |
| unknown | NA | NA | NA | SJC_S027746 | NA | NA | NA | Sjp_0134080.1 | cellular process                              | 0.63852  |
| unknown | NA | NA | NA | SJC_S027754 | NA | NA | NA | Sjp_0134090.1 | cellular process                              | 0.63852  |
| unknown | NA | NA | NA | SJC_S027762 | NA | NA | NA | Sjp_0134100.1 | NA                                            | NA       |
| unknown | NA | NA | NA | SJC_S027782 | NA | NA | NA | Sjp_0134110.1 | response to stimulus                          | NA       |
| unknown | NA | NA | NA | SJC_S027790 | NA | NA | NA | Sjp_0134130.1 | NA                                            | NA       |
| unknown | NA | NA | NA | SJC_S027791 | NA | NA | NA | Sjp_0134140.1 | NA                                            | NA       |
| unknown | NA | NA | NA | SJC_S027793 | NA | NA | NA | Sjp_0134150.1 | biological regulation                         | 0.76396  |
| unknown | NA | NA | NA | SJC_S027803 | NA | NA | NA | Sjp_0134160.1 | NA                                            | NA       |
| unknown | NA | NA | NA | SJC_S027804 | NA | NA | NA | Sjp_0134170.1 | NA                                            | NA       |
| unknown | NA | NA | NA | SJC_S027809 | NA | NA | NA | Sjp_0134180.1 | NA                                            | NA       |
| unknown | NA | NA | NA | SJC_S027812 | NA | NA | NA | Sjp_0134190.1 | cellular component organization or biogenesis | NA       |
| unknown | NA | NA | NA | SJC_S027813 | NA | NA | NA | Sjp_0134200.1 | NA                                            | NA       |
| unknown | NA | NA | NA | SJC_S027815 | NA | NA | NA | Sjp_0134210.1 | NA                                            | NA       |
| unknown | NA | NA | NA | SJC_S027823 | NA | NA | NA | Sjp_0134220.1 | NA                                            | NA       |
| unknown | NA | NA | NA | SJC_S027827 | NA | NA | NA | Sjp_0134230.1 | molecular transducer                          | 0.50162  |

|         |    |    |    |             |    |    |    |               |                                 |          |
|---------|----|----|----|-------------|----|----|----|---------------|---------------------------------|----------|
|         |    |    |    |             |    |    |    |               | activity                        |          |
| unknown | NA | NA | NA | SJC_S027832 | NA | NA | NA | Sjp_0134240.1 | NA                              | NA       |
| unknown | NA | NA | NA | SJC_S027845 | NA | NA | NA | Sjp_0134250.1 | NA                              | NA       |
| unknown | NA | NA | NA | SJC_S027861 | NA | NA | NA | Sjp_0134270.1 | NA                              | NA       |
| unknown | NA | NA | NA | SJC_S027862 | NA | NA | NA | Sjp_0134280.1 | NA                              | NA       |
| unknown | NA | NA | NA | SJC_S027877 | NA | NA | NA | Sjp_0134290.1 | catalytic activity              | 0.035844 |
| unknown | NA | NA | NA | SJC_S027878 | NA | NA | NA | Sjp_0134300.1 | NA                              | NA       |
| unknown | NA | NA | NA | SJC_S027883 | NA | NA | NA | Sjp_0134320.1 | binding                         | 0.052762 |
| unknown | NA | NA | NA | SJC_S027886 | NA | NA | NA | Sjp_0134330.1 | cell part                       | 0.009037 |
| unknown | NA | NA | NA | SJC_S027892 | NA | NA | NA | Sjp_0134340.1 | multi-organism<br>process       | NA       |
| unknown | NA | NA | NA | SJC_S027895 | NA | NA | NA | Sjp_0134350.1 | NA                              | NA       |
| unknown | NA | NA | NA | SJC_S027914 | NA | NA | NA | Sjp_0134360.1 | NA                              | NA       |
| unknown | NA | NA | NA | SJC_S027916 | NA | NA | NA | Sjp_0134370.1 | NA                              | NA       |
| unknown | NA | NA | NA | SJC_S027917 | NA | NA | NA | Sjp_0134380.1 | catalytic activity              | 0.035844 |
| unknown | NA | NA | NA | SJC_S027922 | NA | NA | NA | Sjp_0134390.1 | NA                              | NA       |
| unknown | NA | NA | NA | SJC_S027928 | NA | NA | NA | Sjp_0134400.1 | NA                              | NA       |
| unknown | NA | NA | NA | SJC_S027935 | NA | NA | NA | Sjp_0134410.1 | NA                              | NA       |
| unknown | NA | NA | NA | SJC_S027937 | NA | NA | NA | Sjp_0134420.1 | NA                              | NA       |
| unknown | NA | NA | NA | SJC_S027944 | NA | NA | NA | Sjp_0134430.1 | NA                              | NA       |
| unknown | NA | NA | NA | SJC_S027947 | NA | NA | NA | Sjp_0134440.1 | NA                              | NA       |
| unknown | NA | NA | NA | SJC_S027949 | NA | NA | NA | Sjp_0134450.1 | NA                              | NA       |
| unknown | NA | NA | NA | SJC_S027952 | NA | NA | NA | Sjp_0134460.1 | NA                              | NA       |
| unknown | NA | NA | NA | SJC_S027953 | NA | NA | NA | Sjp_0134470.1 | catalytic activity              | 0.035844 |
| unknown | NA | NA | NA | SJC_S027958 | NA | NA | NA | Sjp_0134480.1 | NA                              | NA       |
| unknown | NA | NA | NA | SJC_S027965 | NA | NA | NA | Sjp_0134490.1 | enzyme<br>regulator<br>activity | 0.1755   |
| unknown | NA | NA | NA | SJC_S027968 | NA | NA | NA | Sjp_0134500.1 | multi-organism<br>process       | NA       |
| unknown | NA | NA | NA | SJC_S027970 | NA | NA | NA | Sjp_0134510.1 | NA                              | NA       |
| unknown | NA | NA | NA | SJC_S027971 | NA | NA | NA | Sjp_0134520.1 | NA                              | NA       |
| unknown | NA | NA | NA | SJC_S027973 | NA | NA | NA | Sjp_0134530.1 | catalytic activity              | 0.035844 |
| unknown | NA | NA | NA | SJC_S027973 | NA | NA | NA | Sjp_0134540.1 | electron carrier                | NA       |

|              |    |          |          |             |      |       |    |               |                                               |          |
|--------------|----|----------|----------|-------------|------|-------|----|---------------|-----------------------------------------------|----------|
|              |    |          |          |             |      |       |    |               | activity                                      |          |
| unknown      | NA | NA       | NA       | SJC_S027977 | NA   | NA    | NA | Sjp_0134550.1 | NA                                            | NA       |
| unknown      | NA | NA       | NA       | SJC_S027978 | NA   | NA    | NA | Sjp_0134560.1 | biological regulation                         | 0.76396  |
| unknown      | NA | NA       | NA       | SJC_S027979 | NA   | NA    | NA | Sjp_0134570.1 | enzyme regulator activity                     | 0.1755   |
| unknown      | NA | NA       | NA       | SJC_S027980 | NA   | NA    | NA | Sjp_0134580.1 | biological regulation                         | 0.76396  |
| unknown      | NA | NA       | NA       | SJC_S027981 | NA   | NA    | NA | Sjp_0134590.1 | NA                                            | NA       |
| unknown      | NA | NA       | NA       | SJC_S027986 | NA   | NA    | NA | Sjp_0134600.1 | NA                                            | NA       |
| unknown      | NA | NA       | NA       | SJC_S028009 | NA   | NA    | NA | Sjp_0134610.1 | cell part                                     | 0.009037 |
| unknown      | NA | NA       | NA       | SJC_S028012 | NA   | NA    | NA | Sjp_0134620.1 | biological regulation                         | 0.76396  |
| unknown      | NA | NA       | NA       | SJC_S028014 | NA   | NA    | NA | Sjp_0134630.1 | NA                                            | NA       |
| unknown      | NA | NA       | NA       | SJC_S028022 | NA   | NA    | NA | Sjp_0134640.1 | binding                                       | 0.052762 |
| unknown      | NA | NA       | NA       | SJC_S028026 | NA   | NA    | NA | Sjp_0134650.1 | cell part                                     | 0.009037 |
| HSB10kb_1407 | WZ | 16545139 | 16561865 | SJC_S028032 | 1578 | 12452 | -  | NA            | NA                                            | NA       |
| unknown      | NA | NA       | NA       | SJC_S028037 | NA   | NA    | NA | Sjp_0134670.1 | NA                                            | NA       |
| unknown      | NA | NA       | NA       | SJC_S028041 | NA   | NA    | NA | Sjp_0134680.1 | protein binding transcription factor activity | NA       |
| unknown      | NA | NA       | NA       | SJC_S028042 | NA   | NA    | NA | Sjp_0134690.1 | NA                                            | NA       |
| unknown      | NA | NA       | NA       | SJC_S028044 | NA   | NA    | NA | Sjp_0134700.1 | NA                                            | NA       |
| unknown      | NA | NA       | NA       | SJC_S028045 | NA   | NA    | NA | Sjp_0134710.1 | NA                                            | NA       |
| unknown      | NA | NA       | NA       | SJC_S028048 | NA   | NA    | NA | Sjp_0134720.1 | NA                                            | NA       |
| unknown      | NA | NA       | NA       | SJC_S028049 | NA   | NA    | NA | Sjp_0134730.1 | NA                                            | NA       |
| unknown      | NA | NA       | NA       | SJC_S028059 | NA   | NA    | NA | Sjp_0134740.1 | NA                                            | NA       |
| unknown      | NA | NA       | NA       | SJC_S028061 | NA   | NA    | NA | Sjp_0134750.1 | NA                                            | NA       |
| unknown      | NA | NA       | NA       | SJC_S028066 | NA   | NA    | NA | Sjp_0134760.1 | NA                                            | NA       |
| unknown      | NA | NA       | NA       | SJC_S028067 | NA   | NA    | NA | Sjp_0134770.1 | NA                                            | NA       |
| unknown      | NA | NA       | NA       | SJC_S028068 | NA   | NA    | NA | Sjp_0134780.1 | binding                                       | 0.052762 |
| unknown      | NA | NA       | NA       | SJC_S028069 | NA   | NA    | NA | Sjp_0134790.1 | NA                                            | NA       |
| unknown      | NA | NA       | NA       | SJC_S028069 | NA   | NA    | NA | Sjp_0134800.1 | NA                                            | NA       |

|              |    |          |          |             |       |        |    |               |                               |          |
|--------------|----|----------|----------|-------------|-------|--------|----|---------------|-------------------------------|----------|
| unknown      | NA | NA       | NA       | SJC_S028070 | NA    | NA     | NA | Sjp_0134810.1 | NA                            | NA       |
| unknown      | NA | NA       | NA       | SJC_S028071 | NA    | NA     | NA | Sjp_0134820.1 | cell part                     | 0.009037 |
| HSB10kb_1408 | 4  | 13980240 | 14020566 | SJC_S028071 | 98484 | 132615 | +  | Sjp_0134830.1 | NA                            | NA       |
| HSB10kb_1408 | 4  | 13980240 | 14020566 | SJC_S028071 | 98484 | 132615 | +  | Sjp_0134840.1 | NA                            | NA       |
| unknown      | NA | NA       | NA       | SJC_S028074 | NA    | NA     | NA | Sjp_0134850.1 | NA                            | NA       |
| unknown      | NA | NA       | NA       | SJC_S028075 | NA    | NA     | NA | Sjp_0134860.1 | NA                            | NA       |
| unknown      | NA | NA       | NA       | SJC_S028077 | NA    | NA     | NA | Sjp_0134870.1 | NA                            | NA       |
| unknown      | NA | NA       | NA       | SJC_S028078 | NA    | NA     | NA | Sjp_0134880.1 | biological regulation         | 0.76396  |
| unknown      | NA | NA       | NA       | SJC_S028079 | NA    | NA     | NA | Sjp_0134890.1 | NA                            | NA       |
| unknown      | NA | NA       | NA       | SJC_S028082 | NA    | NA     | NA | Sjp_0134900.1 | NA                            | NA       |
| HSB10kb_1409 | 1  | 17899584 | 17913996 | SJC_S028083 | 1666  | 17482  | -  | Sjp_0134910.1 | molecular transducer activity | 0.50162  |
| HSB10kb_1409 | 1  | 17899584 | 17913996 | SJC_S028083 | 1666  | 17482  | -  | Sjp_0134920.1 | cell part                     | 0.009037 |
| unknown      | NA | NA       | NA       | SJC_S028084 | NA    | NA     | NA | Sjp_0134930.1 | NA                            | NA       |
| unknown      | NA | NA       | NA       | SJC_S028086 | NA    | NA     | NA | Sjp_0134940.1 | binding                       | 0.052762 |
| unknown      | NA | NA       | NA       | SJC_S028088 | NA    | NA     | NA | Sjp_0134950.1 | cellular process              | 0.63852  |
| unknown      | NA | NA       | NA       | SJC_S028095 | NA    | NA     | NA | Sjp_0134960.1 | NA                            | NA       |
| unknown      | NA | NA       | NA       | SJC_S028096 | NA    | NA     | NA | Sjp_0134970.1 | cell part                     | 0.009037 |
| unknown      | NA | NA       | NA       | SJC_S028100 | NA    | NA     | NA | Sjp_0134980.1 | NA                            | NA       |
| unknown      | NA | NA       | NA       | SJC_S028107 | NA    | NA     | NA | Sjp_0134990.1 | catalytic activity            | 0.035844 |
| unknown      | NA | NA       | NA       | SJC_S028113 | NA    | NA     | NA | Sjp_0135000.1 | NA                            | NA       |
| unknown      | NA | NA       | NA       | SJC_S028120 | NA    | NA     | NA | Sjp_0135010.1 | NA                            | NA       |
| unknown      | NA | NA       | NA       | SJC_S028121 | NA    | NA     | NA | Sjp_0135020.1 | binding                       | 0.052762 |
| unknown      | NA | NA       | NA       | SJC_S028121 | NA    | NA     | NA | Sjp_0135030.1 | NA                            | NA       |
| unknown      | NA | NA       | NA       | SJC_S028122 | NA    | NA     | NA | Sjp_0135040.1 | NA                            | NA       |
| unknown      | NA | NA       | NA       | SJC_S028131 | NA    | NA     | NA | Sjp_0135060.1 | NA                            | NA       |
| unknown      | NA | NA       | NA       | SJC_S028136 | NA    | NA     | NA | Sjp_0135070.1 | NA                            | NA       |
| unknown      | NA | NA       | NA       | SJC_S028140 | NA    | NA     | NA | Sjp_0135080.1 | NA                            | NA       |
| unknown      | NA | NA       | NA       | SJC_S028162 | NA    | NA     | NA | Sjp_0135100.1 | NA                            | NA       |
| unknown      | NA | NA       | NA       | SJC_S028171 | NA    | NA     | NA | Sjp_0135110.1 | cell part                     | 0.009037 |
| unknown      | NA | NA       | NA       | SJC_S028208 | NA    | NA     | NA | Sjp_0135120.1 | NA                            | NA       |
| unknown      | NA | NA       | NA       | SJC_S028210 | NA    | NA     | NA | Sjp_0135130.1 | NA                            | NA       |

|         |    |    |    |             |    |    |    |               |                       |    |
|---------|----|----|----|-------------|----|----|----|---------------|-----------------------|----|
| unknown | NA | NA | NA | SJC_S028210 | NA | NA | NA | Sjp_0135140.1 | NA                    | NA |
| unknown | NA | NA | NA | SJC_S028211 | NA | NA | NA | Sjp_0135150.1 | immune system process | NA |
| unknown | NA | NA | NA | SJC_S028214 | NA | NA | NA | Sjp_0135180.1 | NA                    | NA |
| unknown | NA | NA | NA | SJC_S028214 | NA | NA | NA | Sjp_0135190.1 | NA                    | NA |
| unknown | NA | NA | NA | SJC_S028215 | NA | NA | NA | Sjp_0135200.1 | NA                    | NA |
| unknown | NA | NA | NA | SJC_S028217 | NA | NA | NA | Sjp_0135210.1 | NA                    | NA |
| unknown | NA | NA | NA | SJC_S028225 | NA | NA | NA | Sjp_0135260.1 | NA                    | NA |
| unknown | NA | NA | NA | SJC_S028227 | NA | NA | NA | Sjp_0135270.1 | NA                    | NA |
