# Supplementary material
Source: PubMed Central journal article supplement (PMC3223292)
Supplement: NIHMS328607-supplement-03.pdf [file NIHMS328607-supplement-03.pdf]

**Table S3.** Density of *S. japonicum* retrotransposable elements found in EBRs (Evolutionary Breakpoint Regions) and non-EBR intervals (determined from homologous synteny blocks at 10 kb resolution).

| Element type <sup>1</sup> | Density EBRs <sup>2</sup> | Density non-EBRs <sup>3</sup> | <i>p</i> -value <sup>4</sup> |
|---------------------------|---------------------------|-------------------------------|------------------------------|
| LTR                       | 0.53                      | 0.48                          | 0.0002                       |
| non-LTR                   | 1.04                      | 0.97                          | 0.0004                       |
| Penelope-like             | 0.14                      | 0.16                          | 0.01                         |

<sup>1</sup> Twenty-five retrotransposable elements detected in the *S. japonicum* genome were used (SjCHGCS1 to SjCHGCS22, and Sj-penelope1 to Sj-penelope3). Of these, 18 were classified as LTR, 4 as non-LTR, and 3 as Penelope-like. Positions of the retrotransposable elements were identified in the *S. japonicum* genome using the RepeatMasker (<http://www.repeatmasker.org/>) program with the *-s* option.

<sup>2</sup> Average no. of retrotransposable elements found in the 10 kb intervals overlapping with EBRs.

<sup>3</sup> Average no. of retrotransposable elements found in the non-EBR regions.

<sup>4</sup> Statistically significant differences in retrotransposable elements in the EBR regions as compared to the rest of *S. japonicum* genome were calculated using the Student's *t*-test with uneven variances.
